# Supplementary material for: Multimodal single-cell/nucleus RNA sequencing data analysis uncovers molecular networks between disease-associated microglia and astrocytes with implications for drug repurposing in Alzheimer's disease
Source: HighWire-hosted journal article supplement (doi:10.1101/gr.272484.120), 2021-02-24
Supplement: Supplemental_Table_S4.zip [file Supplemental_Table_S4.xlsx]

## Sheet: DESCRIPTION
Supplemental Table S4. Disease molecular network results for a mouse snRNA-seq dataset (GSE140511).
PATHWAY ENRICHMENT	Enrichr/Pathways/KEGG 2019 Mouse (FDR <= 0.05)
DISEASE GENE	Enrichr/Diseases or Drugs/DisGeNET (Alzheimer's Disease, FDR <= 0.05)

## Sheet: DEG
mouse gene symbol	avg_logFC	p_val_adj	avg_log2FC
Apoe	1.65542	3.68e-93	2.38827
Cst7	1.34747	1.29e-57	1.94399
Ctsd	0.871388	2.38e-57	1.25715
Myo1e	1.24328	1.72e-54	1.79368
Csf1	1.37714	2.52e-51	1.9868
Ctsb	0.755927	2.9e-47	1.09057
Igf1	1.19668	6.41e-46	1.72645
Baiap2l2	0.940026	1.14e-40	1.35617
Hif1a	0.932959	4.67e-38	1.34597
Srgap2	-0.576282	1.87e-36	-0.831399
Lpl	1.01687	1.21e-33	1.46704
Cd9	0.757682	2.62e-33	1.0931
Trem2	0.61317	1.65e-31	0.884617
Phyhd1	-0.664246	1.38e-30	-0.958304
Cd68	0.769981	1.59e-30	1.11085
Cacna1a	0.653026	2.55e-30	0.942117
P2ry12	-0.632421	6.16e-30	-0.91239
Apbb2	0.705274	6.56e-30	1.0175
Cd74	1.51466	9.65e-29	2.18519
Serpine2	0.670829	1.89e-28	0.967801
Itgax	0.93099	4.56e-28	1.34313
Nrp1	0.765173	2.48e-27	1.10391
Myo5a	0.748063	7.4e-27	1.07923
Zfhx3	-0.617272	2.02e-26	-0.890535
Lpcat2	-0.515506	3.85e-26	-0.743718
Nrip1	-0.608539	6.18e-26	-0.877936
Fchsd2	-0.703294	2.63e-25	-1.01464
Ivns1abp	-0.527479	3.59e-25	-0.760992
Ctsz	0.611222	1.24e-24	0.881807
Crlf2	0.72477	2.39e-24	1.04562
Fgf13	0.736605	3.73e-24	1.0627
Elmo1	-0.541731	5.01e-24	-0.781553
Acaca	0.754151	6.89e-24	1.08801
Cd63	0.755006	7.02e-24	1.08924
Dock4	-0.553249	1.63e-23	-0.798169
Fam105a	-0.6245	1.09e-21	-0.900964
Chd9	-0.583859	1.38e-21	-0.842331
Csf1r	-0.320248	5.39e-20	-0.46202
Lgals3bp	0.692721	1.36e-19	0.999385
Ccl4	0.950819	4.26e-19	1.37174
Selplg	-0.521745	1.72e-18	-0.75272
Ch25h	0.683651	2.73e-18	0.9863
Axl	0.629095	6.27e-18	0.907593
Plau	0.704262	1.31e-17	1.01604
Tyrobp	0.537051	3.48e-17	0.774801
Slc25a25	0.558464	1.3e-16	0.805693
Ltc4s	-0.656829	1.74e-16	-0.947604
Hpse	0.552868	2.7e-16	0.79762
Tnfsf8	0.655182	3.69e-16	0.945228
Ctnna3	0.807758	4.14e-16	1.16535
Dock10	-0.48464	2.38e-15	-0.699187
Fgd2	-0.535425	2.7e-15	-0.772455
Ssh2	-0.395765	2.78e-15	-0.570969
Rftn1	0.572345	4.87e-15	0.82572
Mef2a	-0.343462	5.43e-15	-0.495512
Dgkz	0.493785	6.06e-15	0.712381
Ccl3	0.590514	5.7e-14	0.851931
Fam49b	-0.37474	8.88e-14	-0.540635
Ctsa	0.370481	9.29e-14	0.534491
Frmd4a	-0.441523	1.75e-13	-0.636982
Cd83	0.651203	2.02e-13	0.939487
Ifngr1	-0.496944	2.24e-13	-0.716938
Cadm1	0.457967	2.8e-13	0.660707
Gnas	0.198003	3.88e-13	0.285657
Klhl6	0.454926	4e-13	0.65632
Plekha1	0.437056	4.99e-13	0.630538
Mamdc2	0.714647	9.87e-13	1.03102
Dnajb14	0.365818	1.65e-12	0.527764
Lmo2	0.334163	2.51e-12	0.482096
Usp12	0.562301	3.7e-12	0.811229
Vps13c	0.510506	4.29e-12	0.736504
Celf2	-0.328157	4.37e-12	-0.473431
B2m	0.546986	4.43e-12	0.789135
Pnn	0.0316497	5.5e-12	0.0456608
Fam46c	0.499942	5.92e-12	0.721263
Cacnb2	-0.66761	6.72e-12	-0.963157
Gusb	0.449017	7.46e-12	0.647795
Kcnj2	0.594251	7.5e-12	0.857323
Cpd	0.40669	1.62e-11	0.586729
Plaur	0.54415	3.54e-11	0.785042
Sipa1l2	0.174624	4.08e-11	0.251929
Bcl2	0.569388	5.04e-11	0.821453
Asph	0.434249	5.46e-11	0.626488
Ptprc	0.354898	5.55e-11	0.512009
Arhgap24	0.47291	5.91e-11	0.682265
Tmem206	0.200049	7.08e-11	0.288609
Wnk1	-0.368341	7.42e-11	-0.531404
Ophn1	-0.433812	7.88e-11	-0.625858
Rapgef5	-0.4205	7.93e-11	-0.606653
Lamp2	0.16552	7.94e-11	0.238795
Cd52	0.532522	1.06e-10	0.768267
Hook3	-0.152742	1.12e-10	-0.22036
Rasgrp3	0.339524	1.19e-10	0.48983
Numb	-0.289482	1.32e-10	-0.417634
Tanc2	-0.339563	1.45e-10	-0.489886
Srek1	0.157221	1.52e-10	0.226821
Lgmn	-0.292234	1.88e-10	-0.421605
Cd300lf	0.551225	2.5e-10	0.79525
Aplp2	0.484741	2.92e-10	0.699333
Slco2b1	-0.328818	3.79e-10	-0.474384
Ccr5	-0.618372	4.42e-10	-0.892123
Gtf2h2	-0.269291	5.15e-10	-0.388505
Flt1	0.518855	7.18e-10	0.74855
Npc2	0.378897	7.18e-10	0.546633
Fam20c	0.502877	7.32e-10	0.725498
Anxa3	0.367782	7.8e-10	0.530598
Abhd15	-0.627907	8.62e-10	-0.905878
Il10ra	-0.372921	8.68e-10	-0.538011
Soga1	-0.430303	1.02e-09	-0.620797
Slc40a1	-0.642314	1.11e-09	-0.926663
Asb10	0.502963	1.26e-09	0.725622
Map4	-0.184852	1.28e-09	-0.266685
Csf2ra	0.433406	1.63e-09	0.625273
Cd180	0.391335	2.75e-09	0.564577
Dgkd	0.40455	2.99e-09	0.583642
Sp100	0.479287	3.04e-09	0.691465
Rpl10a	0.381141	3.15e-09	0.54987
Setd2	-0.296119	3.4e-09	-0.42721
Tbc1d9	-0.49294	3.48e-09	-0.711162
Atp6v1b2	0.166006	4.73e-09	0.239496
Lyst	0.403485	4.99e-09	0.582106
Nav2	-0.339468	5.23e-09	-0.489749
Cebpz	-0.281513	5.47e-09	-0.406138
Wdfy2	-0.346385	5.62e-09	-0.499728
Adap2	-0.386477	5.78e-09	-0.557569
Smg1	-0.151748	6.13e-09	-0.218926
Dip2b	-0.378281	6.34e-09	-0.545744
Abca9	-0.340695	6.62e-09	-0.491519
Litaf	0.464081	6.94e-09	0.669528
Anxa5	0.394763	7.56e-09	0.569522
Pfkl	0.300738	7.93e-09	0.433873
Gabbr1	-0.355685	8.38e-09	-0.513144
Tecpr1	0.440214	8.76e-09	0.635094
Slc6a6	0.138051	1.11e-08	0.199166
Rnf144b	0.36294	1.17e-08	0.523612
Timp2	0.463269	1.21e-08	0.668356
Cdk8	0.188229	1.33e-08	0.271557
Hexa	0.514557	1.35e-08	0.742348
Cybb	0.507897	1.37e-08	0.73274
Myo1f	0.278887	1.49e-08	0.402349
Lrpap1	0.350855	1.52e-08	0.506176
Plek	0.34641	1.59e-08	0.499764
Lrba	-0.552806	1.6e-08	-0.79753
Inpp5d	-0.176642	1.71e-08	-0.254841
Plekhh2	0.458695	1.76e-08	0.661757
Ewsr1	-0.0493636	1.77e-08	-0.0712167
Il6st	0.220164	2.31e-08	0.317629
Cx3cr1	-0.345458	2.71e-08	-0.49839
Pkm	0.270916	2.81e-08	0.39085
Wls	0.0233706	2.91e-08	0.0337166
Pwwp2a	-0.307964	3.52e-08	-0.444298
Rassf3	0.426732	3.81e-08	0.615644
Osbpl8	0.23505	4.12e-08	0.339105
Arrdc4	0.495364	4.61e-08	0.71466
St8sia4	0.485493	4.65e-08	0.700419
Tnks2	0.134378	4.83e-08	0.193867
Ecscr	-0.538784	5.14e-08	-0.777301
Dnajc1	-0.0801821	5.28e-08	-0.115678
Cd33	-0.387653	5.35e-08	-0.559266
Asxl2	0.0551626	5.45e-08	0.0795828
Krit1	-0.0200232	5.82e-08	-0.0288873
Erp29	0.218925	6.19e-08	0.315842
Rpl23	0.0840157	6.55e-08	0.121209
Rhobtb1	-0.416249	6.75e-08	-0.600521
Bst2	0.508227	6.9e-08	0.733217
Gpr137b	0.349705	9.01e-08	0.504518
Ddhd1	0.391344	9.63e-08	0.56459
Pld1	-0.529734	1.06e-07	-0.764245
Serinc3	-0.323153	1.06e-07	-0.466211
Itga6	-0.357718	1.24e-07	-0.516077
Adarb1	0.41428	1.41e-07	0.597679
Pdcd1	0.397203	1.57e-07	0.573043
Hsp90aa1	-0.337936	1.59e-07	-0.487539
Ldlr	0.394051	1.65e-07	0.568496
Sh3pxd2b	0.45742	1.69e-07	0.659918
Tec	0.433756	1.72e-07	0.625778
Socs6	0.371401	1.78e-07	0.535818
Glul	-0.388504	1.84e-07	-0.560493
Srsf5	-0.224897	1.85e-07	-0.324457
Far1	0.114948	1.91e-07	0.165834
Krcc1	-0.156245	2.08e-07	-0.225414
Cyba	0.39085	2.44e-07	0.563877
Rap1gds1	-0.246183	2.5e-07	-0.355167
Ncf2	0.105891	2.63e-07	0.152769
Eef1a1	-0.00648485	2.7e-07	-0.00935567
Camk2d	-0.261076	2.78e-07	-0.376654
Dapp1	-0.397562	3.07e-07	-0.573561
Gnptab	0.349828	3.12e-07	0.504695
Cflar	-0.267997	3.13e-07	-0.386637
Smarca2	-0.17945	3.43e-07	-0.258892
Bhlhe40	0.412089	3.63e-07	0.594519
Syngr1	0.239645	4.11e-07	0.345735
Nipbl	-0.0275635	4.19e-07	-0.0397657
Gcnt2	0.395562	4.47e-07	0.570676
Hnrnpk	0.126901	4.66e-07	0.183079
Eml4	0.317835	5.03e-07	0.458539
Creb3l2	0.345481	5.18e-07	0.498424
St3gal6	-0.213277	5.61e-07	-0.307693
Arhgap4	-0.512395	6.61e-07	-0.739229
Man1a2	-0.0310593	6.81e-07	-0.0448091
Lrrk1	-0.210718	6.91e-07	-0.304002
Gng12	0.238959	7.33e-07	0.344744
Nav3	-0.328858	7.67e-07	-0.474441
Rtn1	-0.282796	7.73e-07	-0.407988
Arhgap26	0.368606	7.79e-07	0.531786
Colgalt1	0.248675	8.04e-07	0.358762
Acin1	-0.0385588	8.26e-07	-0.0556286
Arf4	0.258447	8.3e-07	0.37286
Phka2	0.299605	8.34e-07	0.432239
Xylt1	0.455939	8.55e-07	0.657781
Mvb12b	-0.214389	8.74e-07	-0.309298
Plekhm2	0.431278	8.75e-07	0.622202
Nktr	0.244673	9.42e-07	0.352989
Olfm1	-0.208316	9.72e-07	-0.300536
Tpi1	0.206025	1.03e-06	0.297231
Ppt1	0.0233382	1.08e-06	0.03367
Dhx32	0.382776	1.27e-06	0.55223
Slmap	0.058348	1.29e-06	0.0841783
Fnip2	0.384926	1.36e-06	0.555331
Rsrc2	-0.0146759	1.39e-06	-0.0211729
Arhgap17	0.154127	1.42e-06	0.222359
Skil	0.0846868	1.43e-06	0.122177
Ndfip1	-0.21694	1.52e-06	-0.312979
Atp1b3	0.261502	1.54e-06	0.377268
Rplp0	0.127008	1.54e-06	0.183234
Srebf2	0.206327	1.59e-06	0.297667
Spp1	1.29811	1.64e-06	1.87278
Tep1	0.0917895	1.68e-06	0.132424
Unc93b1	-0.22664	1.69e-06	-0.326973
Trim2	-0.353032	1.74e-06	-0.509318
Gas2l3	0.395864	1.8e-06	0.571111
Rap2b	0.298235	1.8e-06	0.430263
Tbc1d4	0.474211	1.91e-06	0.684142
Grn	0.349425	1.96e-06	0.504114
Zcchc7	-0.0961969	1.97e-06	-0.138783
Arhgef40	-0.331649	2.03e-06	-0.478469
Vdac2	0.122877	2.08e-06	0.177274
Nckap1l	-0.150432	2.21e-06	-0.217027
Zfc3h1	0.103044	2.32e-06	0.148661
Ylpm1	-0.249137	2.39e-06	-0.359429
Rpsa	0.146512	2.47e-06	0.211373
Ikbkb	0.114955	2.53e-06	0.165845
Klhl24	0.280631	2.89e-06	0.404866
Matr3	-0.084073	3.02e-06	-0.121292
Srsf7	-0.028052	3.03e-06	-0.0404705
Gsk3b	0.0950824	3.04e-06	0.137175
Rap1a	0.0453026	3.27e-06	0.0653578
Tmem55b	-0.177584	3.38e-06	-0.256199
Zc3h7a	-0.21052	3.4e-06	-0.303716
Atp6v0a1	0.147955	3.46e-06	0.213453
Epb41l2	-0.273499	3.51e-06	-0.394576
Trpm7	-0.000837006	3.71e-06	-0.00120754
Plxdc2	0.282096	3.75e-06	0.406979
Rpl3	0.180614	3.76e-06	0.26057
Itsn2	0.102625	3.83e-06	0.148056
Lrrc58	0.0939728	3.87e-06	0.135574
Golm1	-0.320191	4.27e-06	-0.461938
Paip2	0.116091	4.41e-06	0.167484
Klf3	-0.32292	4.92e-06	-0.465875
Dock8	-0.237055	5.07e-06	-0.341997
Tpd52	0.321387	5.15e-06	0.463663
Map3k2	-0.0169829	5.74e-06	-0.0245011
Capn3	-0.346493	5.85e-06	-0.499884
Vamp4	-0.00785685	6.06e-06	-0.011335
Tbc1d5	-0.231785	6.22e-06	-0.334395
Rbpj	0.183921	6.23e-06	0.265342
Safb2	0.0558698	6.67e-06	0.080603
Soat1	0.39985	6.68e-06	0.576861
Zfp62	-0.0910052	6.75e-06	-0.131293
Sh3bp2	0.275962	6.91e-06	0.398129
Cdk11b	0.132188	7.24e-06	0.190708
Mfsd12	0.432866	7.32e-06	0.624494
Rsbn1l	0.0107951	7.65e-06	0.015574
Btbd9	0.0466873	7.71e-06	0.0673555
Myo9b	0.384334	7.8e-06	0.554476
Mms19	-0.0136134	7.95e-06	-0.0196399
Gria2	-0.178488	8.07e-06	-0.257504
Ptpn1	-0.225593	8.07e-06	-0.325461
Ktn1	-0.191226	8.18e-06	-0.275881
Dusp3	0.239747	8.24e-06	0.345882
Serbp1	-0.0796116	8.33e-06	-0.114855
Tmbim6	0.0414776	8.33e-06	0.0598395
Ubb	-0.0739849	8.4e-06	-0.106738
Oxct1	0.130765	8.75e-06	0.188654
Cab39	0.192489	8.92e-06	0.277703
Il4i1	0.403645	9.11e-06	0.582336
Tardbp	-0.111836	1e-05	-0.161346
Bmp2k	-0.193337	1.03e-05	-0.278927
Rpl27a	0.0961309	1.03e-05	0.138687
Cyth1	0.332272	1.04e-05	0.479368
Tgfbr2	0.315186	1.05e-05	0.454718
Mtdh	-0.10308	1.07e-05	-0.148713
Hnrnpl	0.0549517	1.12e-05	0.0792785
Fgr	0.393787	1.15e-05	0.568114
Mtus1	-0.299249	1.16e-05	-0.431725
Samsn1	0.306139	1.18e-05	0.441665
Dcakd	-0.0554825	1.23e-05	-0.0800443
Cyb5r1	0.265614	1.26e-05	0.3832
Uvrag	0.102244	1.33e-05	0.147506
Sel1l	0.0643495	1.39e-05	0.0928367
Nfatc1	0.12035	1.4e-05	0.173628
Cspp1	0.0632548	1.49e-05	0.0912574
Ctsh	-0.0260774	1.52e-05	-0.0376218
Zdhhc20	-0.246968	1.53e-05	-0.356299
Nlrc5	0.416182	1.55e-05	0.600424
Dpy19l4	0.312688	1.56e-05	0.451114
Atp6v1c1	0.260577	1.58e-05	0.375933
Lpar6	-0.433153	1.61e-05	-0.624907
Abcd2	0.357498	1.63e-05	0.515761
Rpl18a	0.257539	1.63e-05	0.37155
Lat2	0.258298	1.64e-05	0.372646
Syt1	-0.195293	1.64e-05	-0.281748
Man1c1	0.0838862	1.67e-05	0.121022
Dpp7	0.318217	1.68e-05	0.459091
Capzb	-0.00323671	1.71e-05	-0.00466959
Nup98	0.147169	1.71e-05	0.21232
Kdm3b	-0.156101	1.77e-05	-0.225207
St6gal1	0.30737	1.8e-05	0.443441
Uso1	0.156903	1.81e-05	0.226363
Slc44a2	0.228884	1.82e-05	0.33021
Gpnmb	0.57229	1.85e-05	0.82564
Wasl	-0.0989622	1.99e-05	-0.142772
Psme1	0.151394	2.01e-05	0.218415
Csnk2a1	-0.159625	2.03e-05	-0.230291
Entpd1	-0.362677	2.07e-05	-0.523232
Dna2	0.373856	2.15e-05	0.53936
Rpl37	0.0047691	2.15e-05	0.00688035
Nek7	0.0570706	2.18e-05	0.0823355
Rere	-0.186847	2.23e-05	-0.269563
Tef	-0.122776	2.25e-05	-0.177128
Ptpra	0.197836	2.26e-05	0.285417
P4hb	0.104342	2.3e-05	0.150534
Rpl15	0.148664	2.31e-05	0.214476
Dtx3	0.205802	2.32e-05	0.296909
Rbms1	0.31755	2.41e-05	0.458128
Tcf25	0.100124	2.44e-05	0.144448
Nrbf2	0.324241	2.5e-05	0.46778
Taf15	0.002286	2.5e-05	0.003298
Slfn5	0.334764	2.51e-05	0.482963
Crlf3	-0.261859	2.52e-05	-0.377783
Efr3a	-0.0015872	2.55e-05	-0.00228984
Atf3	0.376998	2.57e-05	0.543893
Clta	0.044162	2.6e-05	0.0637123
Nptn	0.082143	2.63e-05	0.118507
Ncoa3	-0.0537343	2.64e-05	-0.0775222
Kif13b	0.0480668	2.66e-05	0.0693457
Rplp1	0.0754331	2.7e-05	0.108827
Ogt	0.136045	2.71e-05	0.196272
Eea1	0.114097	2.75e-05	0.164608
Tmem50a	0.19204	2.76e-05	0.277054
Snrnp48	-0.0332478	2.77e-05	-0.0479665
Rps2	0.100331	2.79e-05	0.144747
Pld3	0.319068	2.82e-05	0.460318
Cbl	-0.167961	2.84e-05	-0.242317
Copa	0.0879087	2.87e-05	0.126825
Rnf149	0.264388	2.9e-05	0.381432
Lmbrd1	0.151847	2.98e-05	0.219069
Mapk1	-0.0625707	3.09e-05	-0.0902705
Dab2	0.722477	3.1e-05	1.04231
Gtf2a2	-0.0335214	3.1e-05	-0.0483612
Maf	-0.407267	3.1e-05	-0.587562
Rgl2	0.0754842	3.12e-05	0.108901
Plekha2	0.072267	3.17e-05	0.104259
Pafah1b1	-0.0220076	3.19e-05	-0.0317502
Ncor1	0.0196606	3.36e-05	0.0283642
Rab11fip5	0.220972	3.39e-05	0.318795
Camk2n1	-0.290532	3.43e-05	-0.419149
Rad23b	-0.0498038	3.45e-05	-0.0718517
Fam91a1	-0.296634	3.53e-05	-0.427952
Got1	0.333513	3.68e-05	0.481157
Rbm5	-0.0906144	3.68e-05	-0.130729
Ppib	0.189644	3.71e-05	0.273598
Rps15a	0.189661	3.86e-05	0.273623
Cdk13	-0.00169577	3.89e-05	-0.00244647
Arl6ip5	0.159784	3.97e-05	0.23052
Evl	-0.045446	3.97e-05	-0.0655647
Ank2	-0.102023	3.98e-05	-0.147188
Efhd2	0.0823742	4.06e-05	0.118841
Pmp22	0.349669	4.35e-05	0.504466
Fabp5	0.293972	4.39e-05	0.424112
Ash1l	-0.100931	4.6e-05	-0.145613
Ndufa10	-0.197737	4.78e-05	-0.285274
Arnt	0.0644069	4.82e-05	0.0929195
Ctbp2	0.108541	4.86e-05	0.156591
Ptbp3	-0.0196539	4.94e-05	-0.0283546
Alkbh1	0.262076	5.12e-05	0.378095
Clip1	0.203783	5.13e-05	0.293997
Phip	0.208394	5.14e-05	0.300648
Grb2	0.218602	5.24e-05	0.315376
Pten	-0.320969	5.41e-05	-0.46306
Sirt7	-0.231832	5.55e-05	-0.334463
Ppp3ca	-0.210938	5.58e-05	-0.304319
Mitf	0.221719	5.65e-05	0.319873
Osbpl11	-0.156095	5.65e-05	-0.225197
Mbnl2	-0.0268424	5.75e-05	-0.0387253
Mier1	-0.0900741	5.79e-05	-0.129949
Tmod3	-0.0746072	5.8e-05	-0.107635
Rbm47	0.207961	5.83e-05	0.300024
Insig1	0.391079	5.84e-05	0.564208
Cttnbp2nl	-0.127288	5.88e-05	-0.183637
Psmd11	0.146769	5.9e-05	0.211742
Atp6v0c	0.143758	6.01e-05	0.207399
Mgrn1	-0.0849134	6.04e-05	-0.122504
Ckb	-0.218298	6.07e-05	-0.314938
Lyn	-0.160037	6.13e-05	-0.230884
Rasa4	0.325624	6.22e-05	0.469776
Slc4a7	-0.163018	6.35e-05	-0.235185
Ap3b1	0.00237612	6.43e-05	0.00342802
Mpeg1	0.242895	6.52e-05	0.350423
Sfpq	-0.111617	6.7e-05	-0.16103
Atp8a1	0.0978322	6.79e-05	0.141142
Ddx42	-0.0248489	6.89e-05	-0.0358495
Srsf3	0.0672971	6.94e-05	0.0970892
Srpr	-0.0426647	7.03e-05	-0.0615521
Insr	-0.166905	7.22e-05	-0.240793
Cdc37l1	-0.0483446	7.32e-05	-0.0697465
Atp5j2	-0.0104742	7.33e-05	-0.0151111
Eif5	0.169106	7.34e-05	0.243969
Galc	0.304464	7.38e-05	0.439249
Itgb5	-0.202665	7.39e-05	-0.292383
Bnip2	-0.0244924	7.4e-05	-0.0353351
Anapc15	0.158165	7.47e-05	0.228184
Cerk	0.048036	7.51e-05	0.0693013
Slc12a9	-0.23264	7.53e-05	-0.335628
Mecp2	-0.0622905	7.57e-05	-0.0898662
Cd34	0.398654	7.76e-05	0.575137
Slc25a3	0.054634	8.21e-05	0.0788202
Ogfrl1	-0.10364	8.39e-05	-0.149521
Akap10	0.12987	8.41e-05	0.187362
Alg8	0.242567	8.46e-05	0.34995
Aplp1	-0.146408	8.49e-05	-0.211222
Nfat5	-0.173405	8.6e-05	-0.250171
Arl4c	-0.153031	8.68e-05	-0.220777
Rnf216	-0.0983006	8.72e-05	-0.141818
Eno1	0.148135	8.93e-05	0.213713
Rps6ka1	-0.399212	8.98e-05	-0.575942
Cdk19	0.165235	9.12e-05	0.238383
Cnot4	0.0313632	9.14e-05	0.0452475
Leng8	-0.0305065	9.14e-05	-0.0440116
Wwp1	0.413279	9.43e-05	0.596235
Rab2a	-0.0563037	9.49e-05	-0.0812291
Tcerg1	0.159774	9.61e-05	0.230504
Scmh1	-0.268782	9.62e-05	-0.38777
Nfkbiz	0.203992	9.66e-05	0.294298
Gnl3	0.230773	9.69e-05	0.332935
Slc3a2	0.2765	9.71e-05	0.398905
Tspan7	-0.204573	9.78e-05	-0.295136
Fbxw4	0.196838	0.000101501	0.283978
Nufip2	0.0909297	0.000102356	0.131184
Itm2c	0.0787186	0.00010353	0.113567
Mdm2	-0.0807432	0.000104015	-0.116488
Sqstm1	0.0104683	0.00010528	0.0151026
Scpep1	0.304932	0.000106503	0.439924
Fcgr2b	0.365351	0.000111945	0.52709
Trip12	-0.045737	0.000114212	-0.0659845
Ep300	-0.143624	0.000119142	-0.207205
Ctnnb1	0.202308	0.000119732	0.291868
Tgs1	-0.0783908	0.000120491	-0.113094
Prkcd	-0.250562	0.000125088	-0.361485
Pdk1	0.149135	0.000134424	0.215156
Arhgef1	-0.124663	0.000135753	-0.179851
Ddx24	0.00458479	0.000137763	0.00661446
Elf2	0.128249	0.000139449	0.185024
Rcsd1	-0.230008	0.000139811	-0.331831
Samd9l	0.370764	0.000139973	0.534899
Med13	0.0502801	0.000140791	0.0725389
Clasp2	-0.150306	0.000144069	-0.216845
Snrnp70	-0.113508	0.000144178	-0.163757
Rptor	-0.188917	0.000148079	-0.27255
Dkk2	0.33184	0.000148595	0.478744
Zfr	0.0124844	0.000149242	0.0180112
Sort1	-0.322926	0.00015395	-0.465884
Top1	0.0300758	0.000156272	0.0433901
Arrb2	0.0129435	0.000157144	0.0186735
Sh3kbp1	-0.00202806	0.000157611	-0.00292587
Slc1a3	-0.256222	0.000160775	-0.369651
Pdcd10	-0.208986	0.00016333	-0.301503
Nceh1	0.301091	0.000163373	0.434382
Peak1	0.297171	0.000164458	0.428727
Slc25a36	-0.1649	0.00016491	-0.2379
Mgea5	0.00394518	0.000164912	0.00569169
Grina	0.0899975	0.000166111	0.129839
Rtn3	-0.129542	0.000166519	-0.18689
Mycbp2	-0.182104	0.000168396	-0.262721
Sla	-0.144563	0.000168955	-0.208561
Celf1	0.0458869	0.000171813	0.0662008
Slc38a6	0.259824	0.000171851	0.374847
Atf6	-6.11e-05	0.000175644	-8.81487e-05
Fam133b	0.099506	0.000176946	0.143557
Tmem135	-0.129337	0.000186725	-0.186594
Stambpl1	-0.269201	0.000194429	-0.388375
Rhob	-0.335484	0.000195272	-0.484002
Snta1	-0.413891	0.000197271	-0.597119
Commd3	0.0603347	0.000197403	0.0870445
Smg9	0.170766	0.000199361	0.246363
Fbrsl1	-0.360323	0.000200642	-0.519836
Bank1	-0.478928	0.000200747	-0.690947
Taok3	0.00980289	0.00020331	0.0141426
P2rx4	0.300395	0.000205047	0.433378
Asap3	-0.0280068	0.000205498	-0.0404052
Ddx50	-0.0106865	0.000205903	-0.0154173
Cnot7	0.0635121	0.00021187	0.0916286
Napa	0.146171	0.000212303	0.21088
Senp2	-0.105576	0.000222182	-0.152314
Pts	-0.134678	0.000224887	-0.194299
Ralgapa2	0.110196	0.000225896	0.15898
Dpp8	-0.0220936	0.000230595	-0.0318743
Taf1d	-0.110103	0.000231083	-0.158846
Snx30	0.21217	0.000241043	0.306097
Coro1b	0.0233721	0.000243422	0.0337188
Prpf38b	-0.0164908	0.0002456	-0.0237913
Cd84	0.302485	0.000248666	0.436393
Fam208a	0.0487588	0.000249133	0.0703441
Mafg	0.0598764	0.000249698	0.0863833
Pan3	-0.0469351	0.000254834	-0.0677131
Prpf4b	-0.076183	0.000255289	-0.109909
Hectd2	0.322155	0.000256775	0.464771
Arid1a	-0.178799	0.000258682	-0.257952
Prkar1a	-0.041735	0.000263364	-0.0602108
Tmem165	-0.0655307	0.000264203	-0.0945408
Tecr	0.038352	0.000267882	0.0553302
Ago3	0.140429	0.000270434	0.202597
Arpc4	-0.230342	0.000273157	-0.332313
Rps14	0.0712272	0.000273555	0.102759
Rai1	0.0872771	0.000273809	0.125914
Fau	0.0923577	0.000277756	0.133244
Ccdc50	-0.100563	0.000284889	-0.145082
Ncl	-0.0118906	0.000288995	-0.0171545
Wac	0.0458719	0.00029	0.0661792
Fnip1	0.0785908	0.000291695	0.113383
Atp5c1	0.0139435	0.000294895	0.0201163
Vdac1	0.143794	0.00029988	0.207451
Inpp4b	-0.231362	0.000305352	-0.333784
Sc5d	0.234186	0.000305877	0.33786
Rell1	0.331928	0.000308627	0.47887
Acap2	0.111049	0.000309912	0.16021
Sec24b	0.0588697	0.000315176	0.084931
H2afj	-0.0759785	0.000318231	-0.109614
Rab31	-0.0887116	0.000322786	-0.127984
Malsu1	-0.00463793	0.00032675	-0.00669112
Ifnar2	0.130603	0.000330158	0.188421
Eif3a	0.0486301	0.000335054	0.0701584
H2afy	-0.0972255	0.000337194	-0.140267
Ddi2	0.21991	0.000342883	0.317263
Eif4h	-0.0232995	0.000343338	-0.0336141
Slc7a8	-0.225835	0.000349174	-0.325811
Syk	-0.281703	0.000349322	-0.406412
Rnf13	0.130185	0.000363716	0.187817
Ldlrad3	0.309701	0.000364327	0.446805
Dtnbp1	0.27694	0.000368844	0.39954
Kpnb1	-0.247785	0.00037066	-0.357478
Tbxas1	0.231089	0.000371777	0.333391
Rps27	0.102598	0.000375114	0.148017
Smg6	-0.137846	0.000375355	-0.19887
Gapdh	0.118393	0.000379059	0.170805
Dcstamp	0.472462	0.000381354	0.681619
Scamp5	-0.335955	0.000384815	-0.48468
Tnrc6b	-0.126221	0.00038719	-0.182099
Rogdi	-0.297725	0.000388624	-0.429527
Nsmce2	0.11928	0.000390038	0.172084
Dnmt3a	0.184757	0.000391642	0.266548
Stk38	0.113404	0.000392744	0.163608
St14	0.346379	0.000395198	0.499719
Ranbp2	0.118478	0.000395294	0.170927
Daglb	-0.111774	0.000396842	-0.161256
Hspa8	-0.134214	0.000399786	-0.19363
Dusp12	-0.104272	0.000400312	-0.150433
Ikzf1	-0.2347	0.000402321	-0.338601
Rps12	0.0906873	0.000405795	0.130834
Phf3	-0.197035	0.00040805	-0.284262
Gtf2i	-0.0443601	0.000409947	-0.0639981
Atrx	-0.0223457	0.000416932	-0.032238
Cul1	-0.169937	0.000418353	-0.245168
Kcnma1	0.173115	0.000419489	0.249752
Atp5a1	0.00613331	0.000440818	0.00884849
Larp4b	0.000376467	0.000446634	0.000543127
Prkg1	0.235112	0.000447445	0.339196
Pak1	-0.271127	0.000450854	-0.391154
Cep68	-0.401252	0.000456716	-0.578884
Pbrm1	0.0888427	0.000459652	0.128173
Dnajb12	-0.10888	0.000463927	-0.15708
Zfp36l2	-0.345667	0.000468754	-0.498693
Fmn1	0.421191	0.000475732	0.60765
Acer3	0.214427	0.000484395	0.309353
Bbs9	-0.199585	0.000487509	-0.287941
Ywhah	0.100927	0.000487597	0.145607
Srsf1	-0.0703584	0.000490958	-0.101506
Dram2	-0.0508746	0.00049214	-0.0733966
Aup1	-0.010843	0.000494282	-0.0156432
Sdha	-0.0611958	0.000496708	-0.0882868
H3f3b	0.245405	0.000502253	0.354044
Ets1	-0.24704	0.000504753	-0.356403
Ypel3	-0.136977	0.00050839	-0.197617
Syncrip	0.0320873	0.000529715	0.0462922
Cox7c	0.121589	0.000531503	0.175415
Gnaq	-0.0208797	0.000535445	-0.030123
Rpl26	0.15674	0.000543703	0.226127
Cmtm7	-0.421982	0.000549609	-0.608792
Srsf2	0.0360381	0.000551724	0.0519919
Rab43	-0.0638303	0.000552922	-0.0920876
Slc2a1	0.326047	0.000566163	0.470386
Pkib	0.328755	0.000580002	0.474293
Fkbp2	0.0612151	0.00058252	0.0883147
Usp15	-0.0320621	0.000582848	-0.0462558
Pde3b	-0.268595	0.000584324	-0.387501
Pacsin1	0.18277	0.000590998	0.263682
Malt1	-0.145744	0.00059372	-0.210264
Lpp	-0.0817873	0.000595392	-0.117994
Stt3a	0.143778	0.000596272	0.207427
Sgce	-0.233213	0.000615731	-0.336456
Atp5d	0.0210782	0.000622314	0.0304094
Bax	0.0571668	0.000624259	0.0824743
Tgfb1	-0.259018	0.000635147	-0.373684
Raf1	0.187624	0.000649006	0.270685
Rpl19	0.192175	0.000671553	0.27725
Arl10	-0.0701683	0.000671966	-0.101232
Ttc14	-0.0445544	0.000683272	-0.0642784
Ilkap	-0.122223	0.000683911	-0.17633
Ist1	0.163422	0.000723013	0.235768
Kctd12	-0.328291	0.000724765	-0.473624
Sf3b2	-0.0550905	0.000725572	-0.0794787
Wdr44	-0.297961	0.000725823	-0.429867
Ccnt2	0.0303025	0.000737338	0.0437172
Tspan5	-0.0362919	0.000752372	-0.0523581
Atxn10	0.248451	0.000753649	0.358439
Pcm1	-0.0205625	0.000760026	-0.0296654
Atp6v0d2	0.320961	0.000760663	0.463049
Tet2	0.114648	0.000760911	0.165402
Abcc5	0.120142	0.000764554	0.173328
Rpl35a	0.104911	0.000768195	0.151354
Ankrd44	-0.154745	0.000778006	-0.22325
Pank2	0.0112334	0.000791096	0.0162063
Zmynd8	-0.190313	0.000792694	-0.274564
Rnf4	-0.0728227	0.000793327	-0.105061
Asb3	-0.105786	0.000795912	-0.152617
Apba1	-0.230356	0.000796203	-0.332333
Adam10	-0.190958	0.000805643	-0.275494
Gon4l	0.073244	0.000811313	0.105669
Crtc3	0.0455369	0.000850231	0.0656958
Cnbp	0.103161	0.000852369	0.14883
Txndc16	0.366305	0.000860486	0.528466
Sptlc2	0.037306	0.000866849	0.0538212
Nudcd3	0.124077	0.000874273	0.179005
Nrp2	0.171389	0.000880471	0.247262
Rab14	-0.126544	0.000885106	-0.182565
Chd7	0.091908	0.000885728	0.132595
Kif21b	-0.128111	0.00088726	-0.184825
Ilf2	0.0545564	0.000890015	0.0787083
Masp1	0.300969	0.000923705	0.434207
Cpsf6	0.023522	0.000926355	0.0339351
Apc	-0.175139	0.000931262	-0.252672
Dcaf8	-0.0703813	0.000978217	-0.101539
Irf2	0.161564	0.000983051	0.233088
Plxna4	-0.285959	0.000984396	-0.412551
Mettl25	0.163029	0.000995767	0.235201
Nono	0.118818	0.00100819	0.171418
Pycard	-0.0445243	0.00101063	-0.0642349
Zfyve26	0.0917942	0.00102582	0.132431
Rhoa	-0.0374965	0.00103206	-0.054096
Tmem176b	0.21733	0.00103215	0.313541
Cdc42se2	0.289564	0.00104094	0.417752
Capg	0.224086	0.00104131	0.323288
Tia1	-0.165606	0.00104892	-0.238918
Tsc22d4	-0.00199325	0.00105698	-0.00287565
Ap3d1	0.0707347	0.00105724	0.102049
Jmjd1c	-0.0491985	0.00107146	-0.0709785
Bfar	0.00532595	0.00107604	0.00768372
Herc1	-0.173711	0.00111486	-0.250613
Cd2ap	-0.227075	0.00111553	-0.3276
Psmc6	-0.093048	0.00111902	-0.13424
Wbp1l	-0.152636	0.00113292	-0.220208
Ubl3	-0.0932362	0.00113585	-0.134511
Acp2	-0.291356	0.00114049	-0.420338
Csmd3	-0.229769	0.00114753	-0.331487
Mapk14	-0.292868	0.00114973	-0.422519
Trappc6b	-0.0592821	0.00115228	-0.085526
Ehd4	0.218659	0.00117292	0.315458
Spag9	0.066026	0.00117453	0.0952554
Scoc	-0.30264	0.00117545	-0.436618
Dnajc13	0.1122	0.0011825	0.16187
Diaph2	-0.110434	0.00119423	-0.159322
Iscu	-0.0968749	0.00119522	-0.139761
Akap11	-0.154743	0.00120952	-0.223247
Tjp1	-0.301326	0.00121566	-0.434722
Adipor1	0.160345	0.00122315	0.231328
Rps7	0.0659225	0.00123333	0.0951061
Camta1	-0.0689665	0.00124761	-0.0994976
Rmdn1	-0.0496184	0.00126498	-0.0715842
Stx7	0.117918	0.00127797	0.170119
Dnajb11	0.116596	0.00129	0.168213
Atg16l2	0.108713	0.00130361	0.156839
Wasf2	-0.159721	0.00130542	-0.230429
Hnrnpdl	0.0533597	0.00132485	0.0769817
Rgs11	0.198412	0.00134368	0.286248
Tpst2	-0.32622	0.00141132	-0.470636
Cd244	0.358068	0.00141472	0.516583
Hnrnpa2b1	-0.17523	0.00142289	-0.252804
Git2	-0.153143	0.00142444	-0.220939
Dcun1d5	-0.101375	0.00142738	-0.146253
Ppia	0.0505757	0.00145724	0.0729654
Tmem234	-0.070476	0.00146869	-0.101675
Mpp1	0.103757	0.00147199	0.14969
Padi2	-0.0635422	0.00147417	-0.091672
Rpl7	-0.020248	0.00147543	-0.0292117
Iws1	0.0585301	0.00148751	0.0844411
Slain2	0.0310769	0.00149827	0.0448345
Hmgxb3	0.148891	0.00152587	0.214804
Dennd2c	0.219925	0.00154161	0.317285
Tacc1	-0.23395	0.00156211	-0.337519
Rlf	0.0866328	0.001565	0.124985
Trmt1l	-0.11825	0.00158089	-0.170599
Bcar3	0.204357	0.00160818	0.294825
Tnfrsf21	-0.306907	0.00161192	-0.442773
Senp1	0.0250693	0.00164934	0.0361674
Skap2	0.11489	0.00165606	0.165751
Ube2j1	0.107935	0.00165736	0.155718
Spen	-0.179653	0.00165787	-0.259185
Ms4a7	0.56156	0.00167835	0.81016
Gbf1	-0.0758944	0.00168034	-0.109492
Apbb1ip	0.233614	0.00168132	0.337033
Tmem164	-0.024833	0.00170138	-0.0358265
Plekhj1	0.041742	0.00171141	0.060221
Specc1	-0.104367	0.00172343	-0.150569
Gsap	0.0402891	0.0017377	0.0581248
Nfkb1	-0.0142082	0.00174835	-0.0204981
Atf2	0.0589442	0.00175958	0.0850385
Mkln1	-0.0194144	0.00176066	-0.028009
Ctse	0.241715	0.00178801	0.348722
Ifi27	0.099552	0.00178953	0.143623
Serp1	0.201083	0.00179005	0.290101
Camkk2	-0.0660238	0.00179748	-0.0952522
Psenen	0.0876307	0.00180924	0.126424
Cables1	0.352542	0.00180926	0.50861
Rnase4	-0.155641	0.0018167	-0.224542
Ttc17	-0.107694	0.00182322	-0.15537
Ppid	-0.0526786	0.00184245	-0.0759992
Exoc6b	0.0110276	0.00184309	0.0159094
Arpc1b	0.14953	0.00185784	0.215726
Anapc5	0.0566295	0.00186508	0.0816991
Fcer1g	0.245103	0.00189196	0.353609
Pdia3	0.121881	0.00190161	0.175838
U2surp	0.013479	0.00190417	0.0194461
Nck1	0.0839267	0.00191275	0.121081
Prr14l	-0.00268044	0.00193337	-0.00386706
Stk25	-0.0668275	0.00193936	-0.0964116
Alkbh2	0.295444	0.00195148	0.426235
Prickle1	0.240555	0.00197029	0.347048
Csnk1a1	-0.154409	0.0019822	-0.222764
Sars	0.102989	0.00198409	0.148582
Tgif1	0.186129	0.00201443	0.268527
Phlpp2	-0.246161	0.00205374	-0.355136
Cd274	0.153942	0.00206045	0.222091
Sparc	-0.224283	0.0020649	-0.323572
Lipa	0.224479	0.00207074	0.323855
Rab1a	-0.0899523	0.00208434	-0.129774
Hps3	-0.250862	0.00209479	-0.361917
Heatr6	0.180214	0.00210297	0.259994
Lactb2	0.0561022	0.00210916	0.0809384
Zcchc6	0.0364387	0.00211159	0.0525699
Wdfy3	-0.147996	0.00212498	-0.213513
Lims1	0.215991	0.00215495	0.311609
Foxj3	0.0650258	0.00220225	0.0938124
Lrch1	-0.0955652	0.00223053	-0.137871
Speg	0.272777	0.00224206	0.393535
Tbc1d1	0.310298	0.00224424	0.447666
Ppp1cc	0.0182526	0.00227893	0.0263329
Nsd1	-0.167456	0.00229185	-0.241588
Kansl1	0.00437661	0.00231793	0.00631411
Gas7	0.337399	0.00232619	0.486763
Mknk1	-0.0286459	0.00233812	-0.0413272
Atp8a2	-0.365653	0.00236212	-0.527526
Rps23	0.0241183	0.00236842	0.0347954
Ankrd12	0.0154763	0.00237373	0.0223276
Ccl25	-0.0394014	0.0024006	-0.0568442
Mgat5	-0.181779	0.00240894	-0.262252
Ptgs1	-0.25827	0.00242759	-0.372604
Stx6	-0.0854328	0.00243797	-0.123253
Stub1	0.0733737	0.00244811	0.105856
Myo9a	-0.0281374	0.00247064	-0.0405937
Ifi35	0.186073	0.00250426	0.268447
Ttc9c	-0.0811786	0.00252107	-0.117116
Basp1	0.206543	0.00254119	0.297979
Trmt6	-0.138894	0.00255233	-0.200382
Actr1b	0.137598	0.00255625	0.198512
Atad2b	0.0226163	0.00258142	0.0326284
Sec62	0.0214021	0.00261613	0.0308767
Clock	-0.210279	0.00263643	-0.303369
Emc3	0.134776	0.0026646	0.194441
Gna15	-0.284634	0.00266877	-0.41064
Ptgds	-0.204115	0.00267669	-0.294476
Numa1	-0.126368	0.00267834	-0.18231
Tnip2	0.331248	0.00269415	0.477889
Cnrip1	0.197461	0.00270639	0.284876
Eif4a1	0.158084	0.00271767	0.228068
Cwf19l2	-0.0110611	0.00274272	-0.0159578
F13a1	1.09055	0.0027454	1.57333
Arhgef2	0.16081	0.00275493	0.232
Vps13b	0.0151218	0.0027874	0.0218161
Maz	0.13659	0.00278865	0.197058
Eif3h	-0.0186566	0.00279579	-0.0269157
Tpd52l2	-0.0247648	0.00280948	-0.035728
Atp6v1a	0.0278939	0.00281	0.0402425
Pitpna	-0.0345612	0.00281781	-0.0498612
Ahcyl1	0.110905	0.00283285	0.160002
Hectd1	-0.00375786	0.00284166	-0.00542144
Fam168a	-0.0882162	0.00284356	-0.127269
Cltc	0.0757059	0.00289291	0.109221
Tns3	0.0903663	0.00290423	0.130371
Tomm34	0.10652	0.00290474	0.153676
Ntpcr	-0.372638	0.0029092	-0.537603
Smchd1	-0.0615848	0.00293208	-0.0888481
Ccnl1	0.0409174	0.00293261	0.0590313
Dst	-0.24788	0.00294378	-0.357616
Fbxw11	0.130999	0.00301551	0.188992
Fam120b	-0.0178643	0.00303541	-0.0257728
Hspa4	0.186114	0.00304748	0.268506
Mlec	0.0227832	0.00304769	0.0328693
Apobec1	0.552222	0.00310213	0.796688
Psma1	0.119976	0.00310364	0.173088
Chd6	-0.164078	0.00313671	-0.236714
Morf4l1	-0.0144054	0.00316436	-0.0207826
Plaa	0.0748277	0.00319462	0.107954
Cndp2	0.104713	0.00328543	0.15107
Nrxn1	-0.282223	0.00331549	-0.407162
Cap1	0.204197	0.00334545	0.294594
Frmd4b	-0.0950529	0.00337362	-0.137132
Creb1	-0.0474798	0.00337795	-0.0684989
Clk4	0.0509417	0.00338975	0.0734934
Chpf2	0.130609	0.00341801	0.188429
Sdcbp	0.0945296	0.00341987	0.136377
Rab11a	0.0723732	0.00344394	0.104412
Npepps	-0.0109809	0.00347135	-0.015842
Hnrnpa1	0.0422882	0.00355362	0.0610089
Calm1	-0.0162346	0.00355814	-0.0234216
Ndufs4	-0.181504	0.00360238	-0.261855
Fth1	-0.00633694	0.00360852	-0.00914227
Orc3	-0.0692562	0.00361544	-0.0999156
Creg1	0.23482	0.00361757	0.338774
Cep192	0.0803665	0.00364122	0.115944
Rnft1	-0.0808095	0.00364605	-0.116583
Dnajc7	-0.124525	0.00366127	-0.179652
Lsm14a	0.0319267	0.00366327	0.0460605
Smarcc2	-0.05172	0.00367049	-0.0746162
Heatr5a	-0.280782	0.00370307	-0.405083
Snx24	0.295863	0.00376844	0.42684
Ggnbp2	0.02873	0.00379182	0.0414486
Spcs1	0.0751369	0.00379268	0.1084
Akap8l	-0.150507	0.00382477	-0.217136
Neu1	0.199328	0.0038676	0.287569
Eif1	-0.02153	0.00387799	-0.0310612
Clint1	0.237421	0.0038856	0.342526
Cnot2	-0.0183046	0.00397882	-0.0264079
Abcb4	-0.391365	0.00400213	-0.564621
Ergic3	0.131985	0.00405484	0.190414
Urgcp	-0.0424804	0.00405505	-0.0612863
Spop	0.0183995	0.00406692	0.0265449
Ctdspl2	-0.0420053	0.00409151	-0.0606008
Cdc42bpa	0.0109687	0.00409872	0.0158245
Fgf1	0.26501	0.00411265	0.382328
Mdfic	0.292892	0.00413959	0.422553
Ppp1r2	0.00321607	0.00416733	0.0046398
Hck	-0.311904	0.00419164	-0.449982
Pcsk1n	-0.173949	0.00419249	-0.250955
Slc15a3	0.354493	0.00432114	0.511425
Ddx5	-0.0993949	0.00435971	-0.143397
Pik3cd	-0.144568	0.00446209	-0.208568
Scn2a	-0.186195	0.00447758	-0.268623
Golgb1	0.00201803	0.00449781	0.00291141
Poldip3	-0.10881	0.00460355	-0.15698
Mif	0.0411954	0.00460447	0.0594324
Ppp6r3	-0.184908	0.00462463	-0.266766
Knop1	-0.0676067	0.00463606	-0.0975359
Rabep1	0.06165	0.00464335	0.0889421
Glg1	-0.025275	0.00464354	-0.0364642
Pkn2	0.015856	0.00467379	0.0228754
Ttc3	-0.0504674	0.00472448	-0.072809
Slc8a1	-0.244087	0.00477751	-0.352143
Fxr1	-0.0954571	0.00483839	-0.137715
Ddx31	0.32415	0.00484207	0.467649
Thrap3	-0.0171206	0.00489594	-0.0246998
Ptpn6	0.272638	0.0049158	0.393334
Mylip	0.0397426	0.00492059	0.0573364
Dlgap4	-0.0726687	0.00495236	-0.104839
Meaf6	0.0684377	0.0050112	0.0987347
Bin1	-0.235752	0.0050124	-0.340118
Tra2b	0.0243234	0.00501998	0.0350913
Pkn1	-0.174696	0.00504397	-0.252032
Dguok	0.070482	0.00505951	0.101684
Anapc1	0.0962071	0.00506463	0.138797
Gng5	0.195936	0.00508492	0.282677
Atad2	0.360651	0.00513724	0.520309
Ube2i	0.00391935	0.00520721	0.00565443
Arpc2	0.0517616	0.00524441	0.0746763
Snx18	0.00855962	0.00527	0.0123489
Sppl3	-0.165659	0.00527013	-0.238996
Lcp1	-0.0678427	0.00527201	-0.0978763
Srgn	0.374297	0.00529974	0.539997
Itpkb	0.192352	0.00530712	0.277505
Pdcd11	0.12297	0.00532298	0.177408
Rbm26	-0.0210661	0.00534159	-0.030392
Secisbp2l	-0.0523421	0.00535085	-0.0755137
Plekho1	-0.253413	0.00536418	-0.365598
Kmt2e	0.0145339	0.00537311	0.020968
Trim25	0.242876	0.00537623	0.350396
Rps6kb1	-0.018608	0.00540445	-0.0268457
Vps18	-0.000700811	0.00541903	-0.00101106
Mark3	-0.0729825	0.00544481	-0.105291
Cisd2	0.0646961	0.00549245	0.0933367
Mrps15	-0.19323	0.00553201	-0.278772
Med15	-0.0494589	0.00553734	-0.0713541
Osbpl1a	0.0302663	0.00555877	0.043665
Sltm	-0.135956	0.00566272	-0.196143
Rap1b	-0.0855556	0.00571042	-0.123431
Mettl17	0.181075	0.00581023	0.261236
Znrf2	0.197593	0.00581573	0.285066
Ensa	-0.169241	0.00582766	-0.244163
Chn1	-0.15822	0.0058588	-0.228263
Bcl2l1	0.14052	0.00594106	0.202728
Itch	0.00975232	0.00596723	0.0140696
Ncf1	-0.373414	0.005977	-0.538722
Mbd5	-0.195383	0.00597876	-0.281879
Cfl2	0.0213277	0.00607844	0.0307693
Zbtb20	0.00527256	0.00607963	0.00760669
Fcho2	-0.17036	0.00611823	-0.245777
Arl11	0.0393244	0.00622449	0.0567332
Pex1	-0.0404087	0.00623402	-0.0582974
Brd2	0.000773844	0.00625957	0.00111642
Sipa1l1	-0.118319	0.00628409	-0.170699
Arfgap1	0.11263	0.00629473	0.16249
Canx	0.140782	0.00636061	0.203105
Rabgap1	0.0312794	0.00638117	0.0451267
Eepd1	0.242558	0.0065183	0.349937
Ccdc88a	0.195482	0.00652239	0.282021
Rbm3	0.0202753	0.00659212	0.029251
Tlk1	0.195197	0.00661605	0.281609
Eya4	0.211927	0.00671566	0.305746
Rbm33	-0.127489	0.00685971	-0.183928
Nxf1	0.0475222	0.00688632	0.0685601
Dennd6a	0.0688913	0.0068987	0.0993891
Zcrb1	-0.0249692	0.00690942	-0.036023
Kansl2	0.0727273	0.00693519	0.104923
Tmem106b	-0.0479311	0.00710642	-0.0691499
Ctso	-0.103495	0.00710966	-0.149312
Mapk1ip1l	-0.0254343	0.00711066	-0.0366939
Gna13	0.0384665	0.00714449	0.0554955
Abca1	-0.268068	0.00716752	-0.38674
Dcp1a	0.0893681	0.00719593	0.128931
Ndrg4	-0.203956	0.00720282	-0.294246
Rint1	-0.0202507	0.0072312	-0.0292156
Os9	0.0323126	0.007233	0.0466172
Oaz1	-0.0206292	0.00724489	-0.0297616
Tpm3	-0.0154082	0.00735854	-0.0222293
Zmiz1	-0.14158	0.00740326	-0.204256
Tmed3	0.114105	0.00741261	0.164619
Macf1	-0.0543068	0.00755862	-0.0783481
Immt	0.0787211	0.00758639	0.113571
Arih1	0.124181	0.00759775	0.179156
Gorasp2	0.0650149	0.00765624	0.0937967
Cd37	-0.0215566	0.00766576	-0.0310996
Nhlrc3	0.104651	0.00767529	0.15098
Dhrs3	0.242972	0.0076805	0.350535
Mlf2	-0.0513517	0.00779125	-0.0740849
Nagk	0.234211	0.00780973	0.337895
Dlg1	-0.0276955	0.00783393	-0.0399562
Vcp	0.097075	0.00786953	0.14005
Zscan26	-0.0118397	0.00803822	-0.0170811
Gps2	0.187045	0.00807738	0.269849
Pik3r1	-0.163782	0.00810965	-0.236287
Setd5	-0.0228591	0.00828681	-0.0329787
Casp8	-0.114626	0.00829936	-0.165371
Fubp1	-0.047146	0.00830599	-0.0680173
Sdf2l1	0.26487	0.0083698	0.382127
Slc38a10	0.164273	0.00842741	0.236996
N4bp2l2	-0.109703	0.00844801	-0.158268
Secisbp2	-0.0522989	0.00849816	-0.0754514
Strn	0.0944784	0.00851109	0.136304
Ube2f	0.0378664	0.00854974	0.0546297
Baz2a	-0.0385647	0.00858176	-0.055637
Aftph	-0.105757	0.00862043	-0.152575
Smap1	-0.103569	0.00863148	-0.149419
Mertk	-0.144085	0.00873455	-0.20787
Scaf1	0.016304	0.00882793	0.0235217
Ube2w	0.0105388	0.00883129	0.0152043
Zranb2	-0.101384	0.00884892	-0.146267
Zc3h13	0.12205	0.00885729	0.17608
Lamp1	0.19378	0.00889164	0.279566
Fam76a	0.108561	0.00893666	0.15662
Akt3	0.202589	0.00899586	0.292274
Stab1	-0.0605759	0.00908841	-0.0873925
Rnpc3	-0.0156555	0.00909166	-0.0225861
Arnt2	0.251569	0.00909674	0.362937
Arhgap12	-0.189346	0.00914066	-0.273169
Elavl1	0.015086	0.00935817	0.0217645
Rnf169	-0.0777009	0.00940692	-0.112099
Slc30a9	0.0200071	0.00948883	0.0288641
Zzz3	0.0602276	0.00950913	0.08689
Polr2e	0.0567192	0.00959017	0.0818286
Alpk1	0.12053	0.00962016	0.173888
Gm2a	0.243705	0.00968289	0.351592
Cdkn1b	0.0314305	0.00977779	0.0453446
Chd1	-0.139119	0.00987899	-0.200707
Hnrnpr	-0.187151	0.00988284	-0.270002
Qrich1	-0.124732	0.00990018	-0.17995
Cers6	0.0951011	0.00992	0.137202
Plcg2	-0.185	0.00995309	-0.266899
Prkch	0.11435	0.0100616	0.164973
Cfl1	0.0213769	0.0101132	0.0308404
Arpc3	0.10218	0.0102354	0.147414
Pfkfb3	0.144983	0.010265	0.209167
Ptpro	0.0979859	0.0102856	0.141364
Tbc1d22a	0.170174	0.0103216	0.245509
Pkd2	0.119774	0.0103943	0.172797
Rpl14	0.123913	0.010427	0.178769
Bsg	0.0406459	0.010447	0.0586396
Papola	-0.0876278	0.01055	-0.12642
Sacm1l	0.0568411	0.0105625	0.0820043
Fndc3a	0.24649	0.0105862	0.35561
Itfg1	-0.125324	0.0106011	-0.180805
Dad1	0.254905	0.0106093	0.36775
Ythdc1	0.0571014	0.0108091	0.0823799
Rmnd1	0.0540553	0.0108945	0.0779854
Gpr183	0.145934	0.0109105	0.210539
Mlph	-0.299292	0.0109605	-0.431787
Ifngr2	0.11663	0.0111987	0.168261
Eef2k	-0.282349	0.011231	-0.407343
Egln3	0.208581	0.0112919	0.300919
Mtmr6	0.0237022	0.0114042	0.0341951
Sdc3	0.288463	0.0114047	0.416165
Phkg2	-0.110596	0.0116302	-0.159556
Rpl28	0.0954964	0.0116383	0.137772
Amz1	0.213758	0.0116582	0.308388
Iqgap1	0.340924	0.0116739	0.49185
Gtf3c4	0.305463	0.0116921	0.44069
Ddx6	-0.136625	0.0119131	-0.197109
Mcl1	0.146465	0.0119454	0.211304
Sf1	-0.0157405	0.0120784	-0.0227087
Cpeb1	0.211317	0.0121047	0.304866
Ttc5	0.0218221	0.0121466	0.0314826
Ramp1	0.250178	0.0122381	0.36093
Mbtps2	-0.101981	0.0123295	-0.147127
Hdac5	0.0826923	0.0123455	0.1193
Rpl32	0.0840211	0.0125103	0.121217
Adam15	-0.0761562	0.0125501	-0.10987
Tnpo3	-0.00606532	0.0126139	-0.00875041
Proser1	0.0890004	0.0127359	0.1284
Pdia4	0.132975	0.0127408	0.191843
Rplp2	0.304095	0.0128318	0.438717
Pura	-0.0268447	0.0128573	-0.0387286
Cd48	0.273525	0.012889	0.394614
Kidins220	0.0185046	0.0129626	0.0266966
Polb	-0.19699	0.0130316	-0.284197
Huwe1	-0.0645045	0.0131207	-0.0930603
Sema4d	0.10536	0.013245	0.152002
Capza2	-0.15691	0.0132607	-0.226374
Nav1	0.254567	0.0134722	0.367263
Mtch2	0.00481936	0.0136137	0.00695287
Ctcf	-0.00814025	0.0136328	-0.0117439
Rps16	0.123542	0.0137022	0.178233
Gga3	0.0380977	0.013718	0.0549633
Tsc22d2	0.0912628	0.0139199	0.131664
Stat2	0.388591	0.0142528	0.560618
Rpl11	0.15019	0.0142713	0.216678
Uhrf2	-0.0403323	0.0142896	-0.0581872
Ncstn	0.0865797	0.0144843	0.124908
Btrc	0.000756819	0.0145222	0.00109186
Tmem176a	0.226544	0.0146461	0.326835
Map4k4	-0.263349	0.0147489	-0.379932
Nfs1	0.00636528	0.0147562	0.00918316
Anapc11	-0.0322077	0.0148261	-0.0464659
Nudt3	0.0831724	0.0148374	0.119992
Rin2	0.175605	0.0148708	0.253345
Hspa9	0.036057	0.0149328	0.0520192
Sbno2	0.0426342	0.0150103	0.0615082
Lrrc8d	0.0533659	0.0152059	0.0769907
Timmdc1	-0.0778802	0.0152764	-0.112357
Commd4	0.258486	0.0154402	0.372917
Tmem173	-0.372068	0.0155036	-0.536781
Vti1b	-0.0279453	0.0155191	-0.0403165
Aff4	0.00383652	0.0158844	0.00553493
Snd1	0.0300312	0.0159349	0.0433258
Setd3	-0.058497	0.0160436	-0.0843933
Cd53	-0.0266781	0.0161025	-0.0384884
Dhx15	-0.0966818	0.0161638	-0.139482
Fam13b	0.0404322	0.0163862	0.0583314
Rab8b	-0.0704349	0.0164332	-0.101616
Tor1aip2	-0.000773	0.0166014	-0.0011152
Mysm1	-0.0411468	0.0167552	-0.0593623
M6pr	0.141026	0.0168133	0.203458
Gatad2b	-0.123964	0.0168674	-0.178843
Snhg11	-0.11519	0.0168757	-0.166183
Actr3	0.131763	0.0169642	0.190093
Usp14	0.0750665	0.0169997	0.108298
Kdm2b	-0.00223286	0.0170201	-0.00322134
Wsb1	0.126515	0.0173884	0.182522
Aff1	0.11113	0.0174983	0.160326
Picalm	-0.0866944	0.0176818	-0.125074
Ppcdc	-0.176826	0.0176924	-0.255106
Pdss2	0.0736727	0.0179638	0.106287
Bmpr2	0.0824169	0.0181055	0.118902
Rock2	-0.16839	0.0181325	-0.242935
Srpk2	0.0382083	0.018182	0.0551229
Bdp1	-0.0657658	0.0182375	-0.09488
Laptm4a	0.142874	0.0183325	0.206124
Sec11c	0.11818	0.0184473	0.170497
Spcs2	-0.0222613	0.0186257	-0.0321163
Larp4	0.0122058	0.0187726	0.0176093
Psip1	-0.00931691	0.0188076	-0.0134415
Ppip5k2	-0.0746247	0.0188167	-0.107661
Rabep2	0.142848	0.0191474	0.206087
Stau1	0.123284	0.0192175	0.177861
Ncoa5	-0.202061	0.0192709	-0.291513
Fam172a	0.0420328	0.0193981	0.0606406
Slc38a2	0.0445473	0.0194657	0.0642681
Vav1	-0.158021	0.0195708	-0.227976
Prex1	-0.192383	0.0195744	-0.27755
App	-0.0698713	0.0196047	-0.100803
Gramd1a	-0.0385376	0.0196313	-0.055598
Tmed10	0.0730729	0.0196525	0.105422
Chfr	0.00220533	0.019758	0.00318161
Bin2	-0.214576	0.0198365	-0.309568
Adsl	0.0337744	0.0198604	0.0487261
N4bp1	0.0822652	0.0199872	0.118684
Alg1	-0.0549842	0.0203099	-0.0793255
Ddx3x	0.121603	0.0203946	0.175436
Rpl7a	0.119999	0.0204477	0.173122
Actr3b	0.318367	0.0204715	0.459306
Snx10	-0.140658	0.0205306	-0.202927
Rbm28	0.0553046	0.0205875	0.0797876
Rpl12	0.0449479	0.0207765	0.0648461
Ip6k1	-0.0518729	0.0208274	-0.0748367
Lman1	-0.0418405	0.0208496	-0.0603631
Tpcn1	-0.150991	0.0209123	-0.217833
P2ry6	-0.199706	0.0211514	-0.288115
Psmd1	0.108693	0.0212335	0.156811
Plgrkt	-0.0658455	0.0212396	-0.094995
Rev3l	0.0585188	0.0212488	0.0844248
Hnrnpll	0.171345	0.0214036	0.247198
Tmem208	-0.0568073	0.0214331	-0.0819555
Rassf1	-0.0176629	0.0214466	-0.0254822
Rasa1	-0.037624	0.0215228	-0.05428
Atf7	0.0933519	0.0217252	0.134678
Map2k5	0.119552	0.0220865	0.172477
Ppp4c	-0.00490215	0.0223706	-0.00707231
Trak1	0.18149	0.0224998	0.261835
Rps20	0.0882543	0.0225873	0.127324
Atp2a2	-0.0340334	0.0226842	-0.0490998
Rpl24	0.138784	0.0228068	0.200223
Maml3	-0.111172	0.0228929	-0.160387
Arglu1	-0.0645512	0.0230663	-0.0931277
Tpp1	0.203584	0.0231611	0.29371
Rpl34	0.0696425	0.02324	0.100473
Ppp1r9a	-0.158771	0.0232507	-0.229058
Epb41	0.0494572	0.0233055	0.0713516
Vps9d1	-0.0808375	0.0234894	-0.116624
Brd4	-0.152565	0.0237295	-0.220104
Psat1	0.245468	0.0237401	0.354135
Atg16l1	0.0174284	0.0237773	0.0251439
Rpl8	0.101664	0.023855	0.14667
Rap2a	0.158053	0.0238974	0.228022
Snx6	-0.137237	0.0240393	-0.197991
Adrb2	-0.359297	0.024117	-0.518357
Ndst2	-0.0871071	0.0241318	-0.125669
Map2k2	-0.0797478	0.0242105	-0.115052
Pfkfb4	0.277875	0.0244187	0.400889
Csde1	-0.104137	0.0246998	-0.150238
Dido1	-0.205402	0.0249718	-0.296332
Mon2	-0.078706	0.0249944	-0.113549
Srsf10	0.109566	0.0250369	0.158071
Atp2b1	-0.0862621	0.0251044	-0.12445
Set	-0.185918	0.0252234	-0.268223
Nsmaf	-0.135026	0.0254906	-0.194801
Oxr1	0.0272488	0.0256233	0.0393118
Marcks	-0.157175	0.0257149	-0.226756
Arid5b	0.221116	0.0257507	0.319003
Mob4	-0.122076	0.0257859	-0.176119
Map2k4	0.00787958	0.0259242	0.0113678
Pdhb	0.0806905	0.0259609	0.116412
Fblim1	0.229605	0.0261587	0.33125
Ankrd11	-0.126649	0.0262495	-0.182716
Ppp1r10	0.0797036	0.0263756	0.114988
Aebp2	-0.0495025	0.0265119	-0.071417
Idh3g	-0.0783696	0.0265525	-0.113063
Epm2a	0.207125	0.0272859	0.298818
Gcn1l1	-0.172303	0.0272959	-0.248581
Map3k3	-0.245435	0.0274278	-0.354088
Prpf39	-0.0475998	0.0274286	-0.068672
Cdip1	0.101572	0.0275098	0.146537
Aim2	0.00419137	0.0275758	0.00604687
Map1a	-0.262575	0.0276005	-0.378816
Ssb	0.056938	0.0276227	0.0821442
Gpatch8	-0.0161629	0.0276951	-0.0233182
Abi3	-0.0741836	0.0279614	-0.107024
Hmgb1	0.141132	0.028078	0.20361
Dennd4a	-0.132176	0.0282033	-0.19069
Ybx1	0.0873764	0.0282486	0.126058
Cyld	-0.104744	0.0284382	-0.151114
Hp1bp3	0.00429915	0.0286647	0.00620237
Ly9	0.113293	0.0288206	0.163447
Snrpa	-0.0166844	0.0296001	-0.0240705
Ercc6	0.25381	0.0296044	0.36617
Rab7b	0.306208	0.0298705	0.441764
Slc36a1	-0.173711	0.0298961	-0.250612
Ccnd3	-0.251863	0.029977	-0.363362
Pdia6	-0.0427498	0.0300674	-0.0616749
Ssbp1	-0.0279417	0.030361	-0.0403113
Fam117b	-0.118232	0.0304804	-0.170573
Gnpda1	0.145626	0.0306776	0.210093
Sclt1	0.0633029	0.0311344	0.0913268
Echs1	0.194804	0.0314376	0.281043
Pgls	0.153716	0.0314848	0.221765
Mapk3	0.101026	0.0315065	0.145749
Polr3c	0.048885	0.0315304	0.0705262
Izumo4	-0.0906671	0.0317407	-0.130805
Usp46	-0.201686	0.0318098	-0.290972
Fkbp15	-0.106167	0.0319144	-0.153166
Pcyt2	0.151513	0.0321127	0.218588
Ube2d3	-0.046974	0.0321621	-0.0677691
Ostf1	0.0534973	0.0323047	0.0771802
Tusc3	-0.0423675	0.0323984	-0.0611234
Micu2	-0.0297547	0.032652	-0.0429269
Wdr37	-0.117618	0.0329623	-0.169687
Gdi1	0.00305658	0.0329759	0.00440971
Mfsd11	0.302167	0.0331368	0.435935
Usp4	-0.159098	0.0331918	-0.22953
Edf1	-0.0415856	0.0335084	-0.0599954
Zfyve19	-0.0285724	0.0335609	-0.0412212
Akna	-0.213721	0.0335947	-0.308334
Mdh1	0.0599505	0.0336254	0.0864903
Sh3bp1	-0.238968	0.0339482	-0.344759
Bnip3l	0.00525463	0.0341971	0.00758083
Nuak1	-0.232938	0.0343376	-0.336059
Zkscan3	0.0399188	0.0344611	0.0575906
Tulp4	-0.0279583	0.0344701	-0.0403354
Ldhb	-0.342201	0.0345786	-0.493692
Clip2	0.10696	0.0347579	0.15431
Rasal2	-0.0740974	0.0351679	-0.1069
Chic2	-0.195429	0.0352835	-0.281945
Ppp3cb	-0.00801403	0.0352959	-0.0115618
Dclk1	-0.363802	0.0355541	-0.524856
Camk1	0.0260432	0.0358714	0.0375724
Tmem183a	0.205011	0.0365008	0.295768
Fnbp1	0.0809362	0.0367371	0.116766
Atp1a1	0.10247	0.0367433	0.147833
Stx3	0.214779	0.036824	0.309861
Ubac2	-0.235758	0.0368669	-0.340127
Rsf1	-0.101581	0.0369081	-0.14655
Vrk2	-0.299818	0.0369243	-0.432546
Rrbp1	-0.122038	0.037018	-0.176063
Srcap	0.0962951	0.0373563	0.138924
Spi1	-0.101553	0.0377135	-0.146509
Gigyf2	0.132332	0.0377486	0.190915
Wipf1	0.245187	0.0378036	0.35373
Sik2	-0.24268	0.0378567	-0.350113
Phf20l1	0.104194	0.0379884	0.15032
Arl8b	0.0608399	0.0383702	0.0877735
Ppm1l	-0.423008	0.0385861	-0.610272
Zcchc11	-0.151301	0.0385956	-0.218281
Eno2	-0.0973877	0.0387408	-0.140501
Ywhaz	-0.0183906	0.0388327	-0.0265321
Phc3	-0.0366858	0.0389696	-0.0529265
Rpl21	0.00228047	0.039049	0.00329002
Trip11	-0.194162	0.0392348	-0.280117
Pros1	-0.156228	0.0394694	-0.22539
Dctn4	0.0173639	0.0396414	0.0250508
Zc3h14	-0.143042	0.0396431	-0.206366
Tmem65	-0.0380941	0.0396974	-0.0549581
Snx5	-0.168207	0.0398089	-0.242672
Vps13a	-0.0768091	0.0399731	-0.110812
Agps	-0.24342	0.0400304	-0.351181
Ndfip2	-0.0460267	0.0401156	-0.0664024
Comt	-0.0218818	0.0401337	-0.0315688
Gxylt1	-0.21533	0.0406757	-0.310655
Mbnl1	-0.0774217	0.0407009	-0.111696
Herc2	-0.136229	0.0407921	-0.196537
Itpr2	-0.130909	0.0410693	-0.188862
Metap1d	0.0084423	0.0413275	0.0121797
Cux1	0.0409775	0.0415539	0.0591181
Smad7	0.107917	0.0416548	0.155691
Tmem243	0.0475083	0.0417927	0.06854
Baz2b	-0.202417	0.0421049	-0.292026
Preb	-0.107557	0.0425276	-0.155172
Stard3nl	-0.0511301	0.0427379	-0.0737652
Fam173a	0.0357195	0.0430217	0.0515323
Arap3	-0.232002	0.0430531	-0.334708
Slc12a2	0.134114	0.0431898	0.193486
Tmem30a	-0.0452905	0.0434495	-0.0653404
R3hdm1	-0.121539	0.0436327	-0.175344
Zfyve21	0.213091	0.0437565	0.307426
Atl3	-0.0415213	0.0440897	-0.0599025
Sdccag3	-0.0522777	0.0440966	-0.0754208
Taz	-0.0676256	0.0441328	-0.097563
Helz	-0.199045	0.0452998	-0.287161
Scarb1	0.199939	0.0454179	0.288451
Mdm4	-0.0177939	0.0454507	-0.0256711
Ate1	-0.132245	0.0454828	-0.190789
Tln2	-0.0811989	0.045578	-0.117145
Gpcpd1	0.13869	0.0456699	0.200088
Gapvd1	-0.0815825	0.0458043	-0.117699
Naa50	0.154249	0.0458973	0.222534
Rpl36a	0.093605	0.0459032	0.135044
Ahcyl2	0.021116	0.0461066	0.0304639
Tnfaip8	-0.102388	0.0461457	-0.147715
Ctsc	0.307269	0.046428	0.443296
Dpf2	0.0745206	0.0468967	0.10751
Mapre2	-0.016905	0.0469665	-0.0243888
Atxn2	-0.0109483	0.04706	-0.0157951
Olfml3	-0.223463	0.0473284	-0.322389
Fyco1	-0.183323	0.0476126	-0.264479
Ppfia4	0.108386	0.0477475	0.156368
Atp6ap2	0.0426646	0.0478541	0.061552
Arhgap5	-0.150586	0.0480325	-0.21725
Mapre1	-0.177721	0.0481017	-0.256397
Atp2b2	-0.0935411	0.0484965	-0.134951
Plcl2	-0.238409	0.048728	-0.343952
Ank3	-0.0719632	0.0487943	-0.103821
Nfam1	-0.299705	0.0492504	-0.432383
Rbmx	-0.220478	0.0493014	-0.318083
Fgf2	0.208378	0.049471	0.300626
B4galt4	-0.226926	0.0494881	-0.327385
Tcirg1	-0.00135236	0.0502187	-0.00195104
Snx20	0.13502	0.0504821	0.194793
Lcor	-0.061844	0.0507631	-0.0892221
Chd8	0.0382997	0.0510301	0.0552548
Trim35	-0.117706	0.0511076	-0.169814
Tkt	0.175848	0.0513668	0.253694
Capza1	0.0496677	0.0515936	0.0716553
Mroh1	0.234528	0.0516264	0.338352
Vps28	-0.000800868	0.0517826	-0.00115541
Cox4i1	0.0712955	0.0518019	0.102858
Lrig2	0.0455823	0.0518383	0.0657614
Rpl6	0.213572	0.052739	0.30812
Aldh2	0.309417	0.0528772	0.446394
Slc23a2	0.193513	0.0529069	0.27918
C1qb	0.287952	0.0531473	0.415427
Rps18	-0.00226969	0.0532679	-0.00327448
Gab2	-0.091496	0.0537402	-0.132001
Kdm5a	-0.149806	0.0539756	-0.216125
Etv6	0.0679217	0.0546636	0.0979903
Rps10	-0.100999	0.0546676	-0.145711
Akap9	0.00390138	0.0548098	0.0056285
Rbm25	0.0552075	0.0549008	0.0796476
Slco4a1	-0.270274	0.0561063	-0.389922
Cog8	-0.129334	0.0561286	-0.18659
Fbxl20	-0.0830946	0.0561405	-0.11988
Ccnl2	0.125947	0.0564264	0.181704
Gspt1	-0.232865	0.05665	-0.335953
Birc6	-0.0507202	0.0568543	-0.0731738
Tmem87b	0.0780719	0.056949	0.112634
Lrp10	0.0597565	0.0577511	0.0862104
Ankzf1	0.00267812	0.0579126	0.00386371
Vps35	0.0225528	0.0590522	0.0325369
Atp5f1	-0.11722	0.0591721	-0.169112
Pou2f2	-0.23369	0.0591761	-0.337143
Hnrnph1	0.00587334	0.0591801	0.00847344
Xpr1	0.0289212	0.0592641	0.0417245
Camk2a	-0.0696806	0.0594868	-0.100528
Ascc3	0.204115	0.059786	0.294476
Dhx9	-0.0880667	0.0599981	-0.127053
Rc3h1	0.0232312	0.060195	0.0335155
Elk3	0.211106	0.0603125	0.304562
Sowahc	0.108804	0.0604113	0.156971
Zfand6	0.0546473	0.0620898	0.0788394
Rps21	0.254713	0.0621614	0.367473
Cebpg	0.00358705	0.0623034	0.00517502
Stard9	-0.140347	0.0624766	-0.202477
Ncoa2	0.0128062	0.062628	0.0184755
Mrps10	-0.0153546	0.0629389	-0.0221521
Dis3l2	0.067162	0.0629639	0.0968943
Lman2l	-0.15948	0.0631281	-0.23008
Ptbp2	-0.0462008	0.0631988	-0.0666537
Golga1	-0.118303	0.0633301	-0.170676
Dync1li2	-0.0258212	0.0634505	-0.0372521
Btbd1	0.00250849	0.0640374	0.00361898
Ndufa4	0.0156159	0.0643238	0.022529
Ywhag	-0.101496	0.0646199	-0.146428
Gdi2	-0.146417	0.0651939	-0.211235
Jtb	-0.0836519	0.0652645	-0.120684
Parp11	-0.178908	0.0658666	-0.25811
Scamp2	-0.131104	0.0658848	-0.189142
Rab3gap2	0.0905191	0.0660281	0.130591
Irak2	0.152689	0.0660651	0.220284
Yy1	-0.010956	0.0664003	-0.0158062
Clcn4	-0.127006	0.0665112	-0.18323
Wdr26	-0.0977761	0.0666614	-0.141061
Plp1	-0.176649	0.0674043	-0.25485
Hmg20b	0.150479	0.067905	0.217096
Gaa	0.0277076	0.0680423	0.0399737
Grin1	-0.235008	0.0680482	-0.339045
Clcn3	0.0918004	0.068184	0.13244
Tomm40	0.0565253	0.0684716	0.0815488
Hbs1l	0.0210752	0.0687554	0.030405
Plekhh1	0.159235	0.0687582	0.229728
Tmbim4	0.234791	0.0688939	0.338732
Kdm2a	-0.0277254	0.0689377	-0.0399992
Nmt1	-0.0344428	0.0692132	-0.0496904
Slc25a37	-0.307959	0.0699636	-0.444291
Irf8	0.231039	0.0699779	0.333319
Ufsp2	-0.0198092	0.0716322	-0.0285787
Lonp2	0.129139	0.0719376	0.186308
Chuk	-0.126674	0.072289	-0.182752
Sulf2	0.309552	0.0727698	0.446589
Chd2	-0.00238923	0.0729503	-0.00344693
Ipo9	-0.112768	0.0734135	-0.16269
Fut8	-0.0157984	0.0740595	-0.0227922
Fnbp4	0.010712	0.0754434	0.0154541
Aig1	0.162456	0.0772492	0.234375
Itm2b	0.127781	0.0777968	0.184349
Phf14	-0.0852375	0.0783778	-0.122972
Rpl13	-0.0479233	0.0787679	-0.0691386
Caap1	-0.0647791	0.0788575	-0.0934565
Fam219a	0.0930388	0.078884	0.134227
Pi4kb	0.0225181	0.0792792	0.0324868
Brf1	-0.0181244	0.0795621	-0.026148
Sall1	-0.253214	0.0798722	-0.36531
Pnisr	-0.0693911	0.0803316	-0.10011
Foxred1	-0.0358947	0.0813343	-0.051785
Slc16a6	-0.246052	0.0816412	-0.354978
Plod1	-0.0873524	0.0821021	-0.126023
Zcchc8	0.0018936	0.0825443	0.00273189
Evi5	-0.125593	0.082636	-0.181192
Ptprs	0.088489	0.0827925	0.127663
Naa20	0.253266	0.0836104	0.365386
Tmem106a	0.313007	0.0842075	0.451574
Ccni	-0.061866	0.0857386	-0.0892538
Tbc1d10a	0.108416	0.0863959	0.156411
Notch2	-8.13e-05	0.0864114	-0.000117291
Pag1	-0.129062	0.0866108	-0.186197
Csnk1e	-0.186467	0.0866856	-0.269016
Gabarap	-0.0179526	0.0867244	-0.0259001
Dennd1a	-0.0496301	0.0869209	-0.071601
Hmbox1	0.00473354	0.0874824	0.00682905
Hsp90ab1	-0.0203385	0.0890201	-0.0293422
Lrrcc1	0.0358221	0.0893791	0.0516804
Clptm1	-0.017004	0.0894426	-0.0245316
Sumo2	-0.0541459	0.0894528	-0.078116
Spns1	0.148768	0.0896939	0.214627
Cdk17	-0.0498446	0.0897488	-0.0719105
Ddx39b	0.0774137	0.0904265	0.111684
Sh3gl1	0.0486318	0.0906231	0.0701608
Eef1a2	-0.176381	0.0911778	-0.254464
Tfe3	-0.109474	0.0911989	-0.157937
Rps5	0.139199	0.0913031	0.200822
Pom121	-0.0660016	0.0935893	-0.0952201
Cpsf3	-0.18016	0.0939591	-0.259917
Fam171b	-0.155963	0.094205	-0.225008
Ppil2	-0.139613	0.0948954	-0.20142
Spint1	-0.131512	0.095143	-0.189731
Trim5	-0.0186685	0.0960245	-0.0269329
Mdn1	0.0252027	0.0962404	0.0363598
Acbd3	0.0664002	0.096284	0.0957953
Rps9	-0.00621755	0.0964672	-0.00897003
Ssr4	0.045998	0.0965158	0.066361
Naca	0.0454842	0.0966896	0.0656198
Atp6v1h	0.145879	0.0969323	0.210459
Rnf220	0.0305673	0.0972552	0.0440993
Myl6	0.0662194	0.0979381	0.0955345
Mff	0.0239756	0.0981533	0.0345895
Klf12	-0.138509	0.0986212	-0.199827
Synj1	-0.0559253	0.0989438	-0.0806831
Pias1	-0.0608083	0.100012	-0.0877278
Exosc10	0.0662343	0.100104	0.0955559
Mef2d	0.232858	0.10072	0.335943
Ifitm3	0.27379	0.101086	0.394996
Efcab14	0.215612	0.101436	0.311062
Fmnl3	0.0177542	0.102092	0.0256139
Tax1bp1	-0.0102717	0.102334	-0.0148189
Lgals9	-0.0294609	0.102387	-0.0425031
Ptk2b	0.0428004	0.102634	0.0617479
Zwint	-0.182161	0.102938	-0.262803
Senp7	-0.152601	0.104032	-0.220157
Cln3	0.0144888	0.104185	0.0209029
Senp6	-0.0986821	0.10433	-0.142368
Esco1	-0.0548134	0.104494	-0.079079
Irf7	0.343523	0.104702	0.495599
Mkl1	0.141125	0.104991	0.203601
Mfhas1	0.128556	0.105304	0.185467
Ythdf3	0.120257	0.105752	0.173494
Arpp21	-0.0832562	0.105773	-0.120113
Sf3b3	0.0949335	0.106078	0.13696
Rabac1	0.0232694	0.107693	0.0335706
Cyth4	-0.137345	0.108906	-0.198147
Cog3	0.0861177	0.109255	0.124242
Rb1cc1	-0.147743	0.109429	-0.213148
Psma7	-0.0664986	0.110489	-0.0959373
Smc6	0.0539841	0.111346	0.0778825
Cd81	-0.025209	0.111724	-0.0363689
Clic1	-0.0696513	0.112772	-0.100486
Pibf1	-0.0547968	0.113953	-0.079055
Btf3l4	-0.0835239	0.114166	-0.1205
Cycs	0.155983	0.114684	0.225036
Pspc1	-0.0112849	0.114749	-0.0162807
Tfcp2	-0.0888209	0.115087	-0.128141
Scarb2	-0.108799	0.115228	-0.156964
Tomm70a	-0.0172565	0.115364	-0.0248958
Klc4	0.14876	0.11624	0.214615
Tra2a	-0.0769121	0.116308	-0.110961
Lrrfip2	-0.0115462	0.117343	-0.0166576
Atp5g3	0.0169454	0.117844	0.024447
Pik3cb	0.0449217	0.117957	0.0648083
Itga9	-0.343228	0.118312	-0.495173
Peli2	0.183495	0.118637	0.264728
Hnrnpul1	0.0829529	0.118834	0.119676
Rpl29	0.0300791	0.121059	0.043395
Fam45a	-0.120502	0.121266	-0.173847
Srp72	-0.137438	0.121865	-0.198281
Itgb3	0.190333	0.122078	0.274593
Thra	-0.117223	0.124631	-0.169116
Cacul1	-0.118187	0.126014	-0.170508
Ubr5	0.0780461	0.126197	0.112597
Faf2	-0.117903	0.126662	-0.170098
Ly86	0.161032	0.126983	0.232321
Ncor2	-0.00699319	0.12741	-0.010089
Irf3	-0.00936161	0.127481	-0.0135059
Ptma	0.111672	0.13028	0.161108
Usp8	-0.106469	0.130859	-0.153603
Mrpl15	-0.0699324	0.131258	-0.100891
Aagab	-0.0596842	0.133032	-0.0861061
Ndrg3	-0.0122511	0.133234	-0.0176747
Hsd17b12	0.181232	0.133909	0.261463
Zfp36l1	-0.127428	0.134192	-0.18384
Rps8	0.199546	0.134224	0.287884
Sgpl1	0.115812	0.134387	0.167082
Rps4x	-0.0857444	0.135013	-0.123703
Tmcc3	0.101994	0.135571	0.147146
Fkbp3	-0.163612	0.135648	-0.236042
Reep3	0.0735554	0.136152	0.106118
Rpl38	0.0508948	0.137067	0.0734256
Ctc1	-0.183296	0.139245	-0.26444
Gga2	0.0849026	0.139261	0.122489
Ap2m1	-0.0534652	0.139272	-0.077134
Eef1b2	0.189036	0.139529	0.272721
Ccny	0.0694041	0.139588	0.100129
Dnm2	-0.00154483	0.140014	-0.00222872
Dync1li1	0.118864	0.140396	0.171485
Tmed2	0.131881	0.141166	0.190264
Grin2b	-0.114096	0.141531	-0.164605
Slc46a3	-0.0882609	0.141765	-0.127334
Cox6c	-0.211238	0.142043	-0.304751
Tbl1xr1	-0.0222048	0.142144	-0.0320348
Hnrnpa3	-0.0100999	0.143387	-0.014571
Blm	0.0731078	0.143496	0.105472
Serf2	-0.0837626	0.144549	-0.120844
Ctbp1	-0.0793742	0.144945	-0.114513
Atf1	0.0381253	0.145862	0.0550032
C1qtnf4	-0.0243068	0.147654	-0.0350673
Vps41	0.0691087	0.147673	0.0997027
Dync1h1	-0.0737343	0.147728	-0.106376
Ppm1h	0.109181	0.147763	0.157515
Rhog	-0.226418	0.147907	-0.326652
Taf6l	0.0202554	0.148149	0.0292223
Prkca	-0.287201	0.148371	-0.414344
Gabra1	-0.16327	0.149099	-0.235549
Ldha	0.0855494	0.149977	0.123422
Map4k5	-0.105747	0.151011	-0.152561
Rpl13a	0.12487	0.151595	0.180149
Sun1	0.0499056	0.152041	0.0719986
Kat6b	-0.0908133	0.152252	-0.131016
Lcorl	0.106855	0.152456	0.154159
Pum2	0.124449	0.15447	0.179542
Nprl3	0.0477421	0.154472	0.0688772
Becn1	0.0844314	0.155849	0.121809
Mrc1	0.72951	0.156164	1.05246
Slc44a1	0.179917	0.156354	0.259566
Runx1	0.0877931	0.157167	0.126659
Mapk8ip3	-0.0207704	0.157817	-0.0299654
Elp2	0.102285	0.159477	0.147566
Txndc15	0.00840413	0.160721	0.0121246
Gak	0.098417	0.162429	0.141986
Tet3	0.0456217	0.16304	0.0658182
Brd8	0.0675893	0.163623	0.0975108
Pgam1	0.0774501	0.164674	0.111737
Mto1	0.1011	0.164804	0.145856
Tmem205	0.269192	0.164847	0.388362
Plekhn1	0.0232643	0.166716	0.0335633
G3bp1	0.128019	0.167255	0.184692
Arl15	0.104424	0.167397	0.150652
Otud7b	0.00443532	0.170355	0.00639881
Ahctf1	-0.0520601	0.170602	-0.0751068
Brat1	-0.0649611	0.172897	-0.093719
Fli1	-0.210479	0.173023	-0.303656
Pkig	-0.22148	0.1754	-0.319528
Vti1a	0.0970029	0.176073	0.139946
Ptprj	-0.149276	0.17629	-0.21536
Ube2k	-0.0555622	0.177471	-0.0801594
Vps37b	-0.115773	0.179035	-0.167025
Esf1	-0.0419891	0.179566	-0.0605775
Eif2s1	0.0666481	0.180355	0.0961529
Rnf10	0.0331868	0.180924	0.0478784
Prdm2	-0.0237487	0.180963	-0.0342621
Pum1	-0.140934	0.181394	-0.203325
Pacsin2	-0.0190763	0.181725	-0.0275213
Pgrmc1	-0.16551	0.181786	-0.238781
Baz1b	-0.0597	0.182856	-0.0861289
Avl9	0.205222	0.182885	0.296073
Inpp4a	0.103754	0.183424	0.149685
Tpr	0.00977078	0.183844	0.0140963
Tmco6	0.0376269	0.185305	0.0542841
Epn1	-0.066503	0.185394	-0.0959436
Vcl	0.266759	0.187822	0.384852
Cdc42	0.0205183	0.188462	0.0296017
Ankrd52	0.0877247	0.188808	0.12656
Bptf	-0.159136	0.189906	-0.229585
Ccdc12	-0.175471	0.190236	-0.253152
Cacna1d	0.00656114	0.190412	0.00946572
Strada	-0.0925373	0.192334	-0.133503
Fuca1	0.121713	0.193065	0.175595
Fam193a	-0.0539322	0.193313	-0.0778078
Mitd1	0.0939712	0.193324	0.135572
Fbxw2	-0.0647517	0.194827	-0.0934169
Pex6	-0.00820479	0.194902	-0.011837
Btf3	0.106921	0.196419	0.154255
Sharpin	-0.0284328	0.197064	-0.0410198
Pml	0.0630165	0.198053	0.0909135
Ezh1	-0.102034	0.199138	-0.147204
Rpn2	0.137212	0.200476	0.197954
Iffo1	0.0684829	0.202028	0.0987999
Map3k1	0.326755	0.202206	0.471409
Taf2	-0.0807925	0.202898	-0.116559
Reep5	-0.0217211	0.203251	-0.0313369
Eri1	-0.0126195	0.203783	-0.0182061
Rab6b	-0.00373437	0.204327	-0.00538755
Btg1	0.242261	0.204822	0.349509
Zswim8	0.0855472	0.205393	0.123419
Pcbp2	-0.0650483	0.209021	-0.0938449
Bhlhe41	0.0972551	0.210192	0.140309
Pphln1	-0.0637612	0.211858	-0.0919879
Tmf1	-0.154342	0.212324	-0.222668
Ppm1b	0.147561	0.212634	0.212886
Tmem41b	-0.061132	0.214257	-0.0881949
Ppp2r2a	-0.108365	0.21443	-0.156338
Sp110	0.122987	0.216015	0.177433
Strn3	-0.102075	0.216259	-0.147264
Tlr7	0.194097	0.217911	0.280023
Ube2e3	-0.256768	0.219162	-0.370438
Herc4	-0.144165	0.219426	-0.207986
Myadm	-0.262815	0.219506	-0.379162
Sox4	-0.322758	0.220728	-0.465642
Coq2	0.0392039	0.221334	0.0565593
Nfx1	0.0346224	0.222475	0.0499495
Yes1	-0.0440229	0.225767	-0.0635116
Hspa5	0.129907	0.225826	0.187416
Pofut1	0.0221252	0.226236	0.03192
Ugcg	-0.041283	0.226558	-0.0595587
Calr	0.128589	0.226891	0.185515
Kdm4c	-0.110501	0.227112	-0.159419
Cx3cl1	-0.211367	0.228238	-0.304938
Pvr	0.119233	0.228848	0.172017
Cs	0.127242	0.231057	0.183571
Pnpla7	0.183269	0.231098	0.264401
Mzt1	-0.0223217	0.233043	-0.0322034
Dnajc3	-0.0574376	0.234901	-0.082865
Ppp1r13b	0.163481	0.23497	0.235854
Htt	-0.0475995	0.235065	-0.0686715
Prrc2c	-0.00976775	0.235701	-0.0140919
Blmh	0.0752272	0.236104	0.10853
Dnajc5	-0.0186601	0.236161	-0.0269208
Ikbkap	-0.0586569	0.236483	-0.084624
Rcor1	0.243361	0.242021	0.351095
Dhps	0.213815	0.243113	0.30847
Cep350	0.0642156	0.24384	0.0926435
Prelid1	0.202075	0.244139	0.291532
Rbl2	-0.0920713	0.244472	-0.132831
Rnf14	0.0566743	0.245977	0.0817638
Asap1	0.239956	0.246916	0.346183
Appl2	0.0883049	0.247055	0.127397
Wdr33	0.092581	0.247351	0.133566
Cr1l	-0.113437	0.247367	-0.163654
Polr2m	-0.0732018	0.248714	-0.105608
Cd86	-0.178569	0.248731	-0.25762
Abhd12	0.171117	0.249017	0.24687
Fyttd1	0.0670605	0.249278	0.0967478
Smox	0.0389976	0.249502	0.0562616
Ahnak2	0.171691	0.24952	0.247697
Riok3	0.0353872	0.250074	0.051053
Arrdc1	-0.0716656	0.251306	-0.103392
Ptn	-0.302536	0.254461	-0.436467
Ube2s	0.146101	0.255745	0.210779
Per1	0.209007	0.256242	0.301534
Dusp11	0.0322868	0.258426	0.04658
Uty	0.039976	0.259107	0.0576732
Ppp1r21	-0.246499	0.259933	-0.355623
Akr1a1	0.0116652	0.26037	0.0168294
C3ar1	0.259234	0.260604	0.373996
Hbp1	0.196061	0.260696	0.282856
Pigk	0.0165036	0.260888	0.0238097
Scamp1	-0.0569647	0.261129	-0.0821827
Gpbp1	0.0065709	0.261837	0.0094798
Fam102b	-0.110378	0.262673	-0.159242
Naa15	0.0164256	0.262818	0.0236971
Ppp1r11	0.0497752	0.262886	0.0718105
Pex14	-0.0453678	0.263561	-0.0654519
Idh3b	0.0637405	0.264265	0.0919581
Dnajb6	0.0618109	0.264606	0.0891743
Hnrnpf	0.235552	0.264768	0.33983
Mtm1	0.0177118	0.265694	0.0255527
Hnrnph3	-0.0505323	0.268213	-0.0729026
Lrmp	0.155226	0.268304	0.223944
Scaf8	-0.0929567	0.269407	-0.134108
Anapc2	0.0381153	0.269806	0.0549888
Brox	-0.076415	0.272931	-0.110244
Trmt1	0.0847573	0.273149	0.122279
Fip1l1	0.033592	0.27319	0.048463
Vamp2	-0.10363	0.273824	-0.149506
Kdm5d	-0.0954358	0.275738	-0.137685
Gtf3c2	-0.0943265	0.276613	-0.136084
Pcmt1	-0.0279469	0.277463	-0.0403189
Tmem260	0.151503	0.279169	0.218572
Nlk	0.0310933	0.279274	0.0448581
Ppp2r5c	-0.190256	0.27954	-0.274482
Vgll4	-0.0378684	0.281379	-0.0546326
Rspry1	0.0687496	0.282467	0.0991846
Nfe2l2	0.26093	0.282782	0.376442
Bet1	-0.0777262	0.282843	-0.112135
Tspan3	0.125499	0.283901	0.181056
Mbtps1	0.0399284	0.286049	0.0576044
Atp1b1	-0.193227	0.287312	-0.278768
Csk	-0.196301	0.288192	-0.283203
Apod	-0.039001	0.288387	-0.0562666
Fgfr1op2	-0.0488133	0.291082	-0.0704227
Cd72	0.215073	0.2919	0.310284
Nudt5	0.0299186	0.293025	0.0431634
Mtg2	0.0478767	0.29402	0.0690714
Amdhd2	0.133745	0.295268	0.192953
Ell2	0.267136	0.295928	0.385396
Etv4	0.221083	0.296474	0.318956
Lsamp	-0.234409	0.297588	-0.33818
Cln5	0.186758	0.299015	0.269435
Gsdmd	-0.109337	0.299178	-0.15774
Armcx3	0.108964	0.304348	0.157202
Slc39a10	-0.219132	0.305193	-0.316141
Gabarapl2	-0.119715	0.305897	-0.172712
Med12l	-0.00800796	0.306201	-0.011553
Fyn	0.135245	0.308817	0.195117
Rsrc1	-0.0949549	0.309067	-0.136991
Xrn2	0.100324	0.310303	0.144736
Rassf2	-0.155107	0.310409	-0.223772
Atp6v0a2	-0.312847	0.313442	-0.451343
Pard3b	-0.151978	0.314149	-0.219257
Ahi1	-0.141052	0.314705	-0.203494
Naa35	0.0176077	0.322865	0.0254025
St7l	-0.00313619	0.323117	-0.00452456
Ppp1r12a	-0.0371544	0.326096	-0.0536024
Cdk14	0.287	0.326243	0.414054
Parp9	0.172778	0.326943	0.249265
Pfn1	-0.148099	0.32805	-0.213662
Purb	-0.0652517	0.330994	-0.0941383
Fam76b	-0.0964441	0.331348	-0.139139
Tmem184b	0.166976	0.331459	0.240895
Fars2	0.0611486	0.332891	0.0882188
Adprh	-0.0862488	0.333667	-0.124431
Prepl	-0.126621	0.333792	-0.182676
Clic4	0.274387	0.338196	0.395856
Tbl1x	0.119718	0.338565	0.172717
Rpl22l1	0.11541	0.339182	0.166501
Xpo6	0.0812206	0.340377	0.117177
Abr	-0.0206877	0.342171	-0.029846
Rps24	0.0633308	0.343229	0.0913671
Rabl6	0.00939212	0.344126	0.01355
Fance	0.222874	0.3463	0.32154
Arpp19	0.0372329	0.346618	0.0537157
Tm9sf3	0.101095	0.350887	0.145849
Bnip3	0.0479945	0.351944	0.0692414
Il7r	-0.278931	0.353891	-0.402412
Dph5	0.201469	0.353903	0.290658
Penk	-0.0868862	0.354932	-0.12535
Pitpnc1	-0.0396682	0.355061	-0.0572291
Ubr3	-0.136479	0.356	-0.196897
Ppig	-0.11241	0.356389	-0.162173
Eftud2	0.00305597	0.356941	0.00440884
Stk24	-0.0203438	0.358226	-0.0293499
Slc2a8	0.109189	0.360756	0.157527
Lrif1	-0.0554637	0.363067	-0.0800171
Tor1aip1	-0.0153779	0.363781	-0.0221857
Sh2b1	0.11925	0.364214	0.172041
Fes	-0.117559	0.364423	-0.169601
Nrd1	-0.0628306	0.365308	-0.0906454
Mrpl4	0.151582	0.367002	0.218687
Tspan18	-0.239379	0.36711	-0.345351
Pbx3	-0.146	0.36733	-0.210634
Uba52	0.134236	0.367461	0.193661
Cdk12	-0.0237657	0.36802	-0.0342867
Mllt10	0.112339	0.371902	0.16207
Tcf12	-0.0055652	0.371971	-0.00802888
Psme2	-0.000587599	0.372245	-0.000847726
Mx1	0.333682	0.372927	0.481401
Rnf213	0.0105774	0.373477	0.01526
Spire1	-0.0109716	0.375503	-0.0158287
Mbd1	0.0669167	0.375852	0.0965404
Havcr2	0.0417651	0.377511	0.0602543
Kif1a	0.125516	0.379335	0.181081
Timm13	0.00708563	0.380701	0.0102224
Slc12a5	-0.176137	0.383061	-0.254112
Aldoa	0.0802799	0.385887	0.115819
Emg1	0.0849107	0.386049	0.1225
Tmem170b	-0.244054	0.388637	-0.352095
Hivep3	0.0500632	0.38961	0.0722259
Sgk1	0.298123	0.390287	0.430101
C1qa	0.227561	0.391555	0.328301
Bcas2	0.0176347	0.393084	0.0254415
Gpr108	-0.0476623	0.396138	-0.0687621
Ralgapa1	0.113076	0.396167	0.163135
Stk19	-0.0467766	0.396743	-0.0674844
Braf	0.020993	0.397242	0.0302865
Arhgap39	-0.0613467	0.397428	-0.0885046
Ndufa6	-0.013267	0.397499	-0.0191402
Pla2g15	-0.267143	0.399255	-0.385406
Ptpre	0.146126	0.399833	0.210815
Rpl9	0.060208	0.399999	0.0868617
Papd4	0.0268622	0.40115	0.0387539
Suds3	-0.199335	0.403236	-0.287579
Pabpn1	0.0873013	0.408607	0.125949
Slc17a7	-0.234165	0.409721	-0.337829
Rnf180	-0.170155	0.412972	-0.245482
Msn	0.0210246	0.413762	0.0303321
Ly6e	0.0306982	0.415256	0.0442882
Taf7	0.0286134	0.415818	0.0412805
Tmed9	-0.166752	0.415823	-0.240572
Nup88	0.0198429	0.415874	0.0286272
Mtmr3	0.158309	0.416254	0.228391
Pdxdc1	0.0320347	0.416309	0.0462163
Mthfs	-0.0789453	0.416601	-0.113894
Pnrc1	-0.0795388	0.416813	-0.11475
Yae1d1	2.53e-05	0.417897	3.65002e-05
Rab5a	-0.129607	0.420077	-0.186983
Rpl18	0.183137	0.420485	0.26421
Cfh	-0.0344756	0.421086	-0.0497377
Lypla2	0.0499146	0.422411	0.0720115
Gbe1	0.0535332	0.423224	0.077232
Abhd6	-0.136771	0.424073	-0.197318
Snx29	-0.0412837	0.425435	-0.0595598
Crk	0.0831736	0.427975	0.119994
Clk1	-0.172715	0.428064	-0.249175
Chchd3	0.000993732	0.431012	0.00143365
Tuba1a	0.0802703	0.43384	0.115806
Rab22a	0.0282863	0.436039	0.0408086
Hsp90b1	0.0823651	0.438057	0.118828
Rragc	0.18296	0.438128	0.263956
Rb1	-0.0222446	0.43814	-0.0320921
Rps11	0.055044	0.440481	0.0794117
Tox4	0.101135	0.440697	0.145907
Srgap3	0.154728	0.444716	0.223226
Rp9	-0.0877489	0.445879	-0.126595
Tmem199	0.0968919	0.446703	0.139785
Tmem140	-0.0472993	0.44748	-0.0682385
Rnf31	0.019521	0.448124	0.0281628
Tmem245	0.113375	0.44975	0.163565
Scaf11	0.126802	0.449946	0.182937
Zfyve16	-0.0541403	0.450594	-0.078108
Glud1	0.0877917	0.454426	0.126657
Ccz1	-0.0319539	0.45548	-0.0460997
Sec24a	0.0606985	0.459583	0.0875695
Cox8a	0.0840554	0.459616	0.121266
Uqcrc1	0.0601753	0.460628	0.0868147
Zbtb7a	-0.103119	0.462651	-0.148769
Gde1	0.0431033	0.465761	0.0621849
Ipo7	-0.104837	0.469157	-0.151248
Mbp	-0.0746201	0.471049	-0.107654
Nipa2	-0.102681	0.472256	-0.148137
G6pc3	-0.0319924	0.47388	-0.0461553
Lyve1	0.324934	0.475718	0.468781
Pf4	0.260008	0.475718	0.375112
Mob1b	0.0122494	0.47918	0.0176721
Ganab	-0.0157901	0.481564	-0.0227804
Luc7l	0.0889919	0.481672	0.128388
Trim26	-0.063097	0.483133	-0.0910298
Usp48	0.0149807	0.483445	0.0216125
Tarbp2	0.144036	0.483857	0.2078
Stat3	0.0542867	0.486766	0.0783191
Mafb	-0.122801	0.488496	-0.177165
Iah1	0.0997162	0.490892	0.14386
Sp140	0.0641943	0.491572	0.0926128
Arap1	0.0616237	0.491612	0.0889043
Golga3	-0.121097	0.49181	-0.174707
Serinc1	0.017533	0.495139	0.0252947
Eefsec	0.0544839	0.499401	0.0786036
Yars	-0.00384435	0.500461	-0.00554622
Glb1	0.113337	0.501166	0.16351
Zdhhc21	0.153192	0.502392	0.22101
Slc35a3	-0.0879872	0.504273	-0.126939
Rnf111	-0.0587887	0.504702	-0.0848142
Khnyn	-0.165527	0.505456	-0.238806
Timm8b	0.0607261	0.505594	0.0876092
Ireb2	-0.10798	0.505686	-0.155782
Coq10a	0.0693143	0.51599	0.0999994
Tnpo1	-0.19842	0.516903	-0.28626
Map1b	-0.119489	0.519502	-0.172386
Ddost	-0.0383974	0.52052	-0.0553958
Extl3	-0.256537	0.526391	-0.370104
Asah1	-0.00684574	0.526683	-0.00987632
Arid4a	-0.0471208	0.527308	-0.0679809
Akt1	-0.135345	0.531855	-0.195261
Yeats4	0.120642	0.533068	0.17405
Kpna1	0.0293166	0.533848	0.0422949
Zufsp	0.0815757	0.535579	0.117689
Tmed7	0.0629266	0.536239	0.090784
Prpsap1	0.030138	0.537389	0.0434799
Dcaf17	0.00480931	0.538119	0.00693836
Usp40	-0.0846299	0.540396	-0.122095
Top3b	-0.00225749	0.540681	-0.00325688
Fryl	-0.00126198	0.541212	-0.00182065
Sec31a	0.106782	0.542535	0.154054
Nfe2l1	0.101821	0.543519	0.146897
Adam17	-0.106066	0.544691	-0.153021
Ik	0.0362109	0.544852	0.0522413
Tyk2	-0.0409151	0.549849	-0.059028
Smarca5	-0.0508351	0.551749	-0.0733396
Rlim	0.0111358	0.552637	0.0160656
Igsf8	0.0311172	0.553137	0.0448926
Desi2	0.0284042	0.555519	0.0409786
Psmb9	0.0778856	0.555857	0.112365
Ttc13	-0.107245	0.563419	-0.154722
Fry	-0.176345	0.565765	-0.254413
Mia3	-0.038637	0.568107	-0.0557415
Slc46a1	-0.241811	0.568652	-0.34886
Sp3	-0.0375652	0.569332	-0.0541951
Gpr146	0.00920351	0.569527	0.0132779
Man2b2	0.0634657	0.569993	0.0915617
Araf	-0.0626892	0.570087	-0.0904414
Ehmt1	0.0215493	0.571522	0.031089
Crbn	-0.0219111	0.575809	-0.031611
Slc30a5	0.184092	0.575908	0.265588
Crybb1	-0.315297	0.581193	-0.454878
Slc16a10	0.0952508	0.584495	0.137418
St3gal5	-0.218434	0.58454	-0.315133
Pbxip1	0.0553989	0.586912	0.0799237
Stx12	-0.0186675	0.592695	-0.0269315
Ephx1	0.199469	0.593834	0.287773
Ccar1	-0.00159518	0.595862	-0.00230135
Cnpy3	-0.204289	0.595944	-0.294727
Gramd1b	0.172045	0.596568	0.248208
Abl2	0.0986362	0.60016	0.142302
Xbp1	0.022844	0.602587	0.0329569
Gmps	0.0898876	0.602873	0.12968
Hvcn1	0.111685	0.603753	0.161127
Mtch1	0.029152	0.60589	0.0420575
Pi4ka	-0.0613121	0.605993	-0.0884546
Cstf3	-0.0548115	0.607884	-0.0790763
Dnaja1	-0.0627208	0.608188	-0.090487
Cbx3	-0.0430405	0.612489	-0.0620943
Tango2	-0.080848	0.612787	-0.116639
Orc4	-0.135377	0.61336	-0.195307
Nfia	-0.133883	0.614404	-0.193152
Bcap31	0.0770957	0.614533	0.111226
Rps3	0.116096	0.615794	0.167491
Snapc3	-0.0545901	0.618151	-0.0787569
S1pr1	0.214419	0.618372	0.309341
Ap2b1	0.10237	0.618374	0.147689
Ccdc82	0.123449	0.618969	0.178099
Ddrgk1	0.0796444	0.619277	0.114903
Twf2	-0.20141	0.619324	-0.290573
Tnrc18	0.00464658	0.620421	0.0067036
Stt3b	0.161218	0.625215	0.232589
Exoc1	0.101078	0.626283	0.145825
Limk1	0.0928327	0.62798	0.133929
Flna	0.170799	0.628702	0.24641
Atp2c1	0.0790421	0.629622	0.114034
Dhx36	-0.0696005	0.630411	-0.100412
Tgfbr1	-0.107931	0.634356	-0.155711
Prkacb	-0.0690647	0.634883	-0.0996393
Rtf1	0.0433856	0.636085	0.0625922
Rpl39	-0.0666275	0.636466	-0.0961232
Pknox1	-0.280949	0.63828	-0.405323
Fat3	0.29449	0.639466	0.42486
Liph	-0.273044	0.641311	-0.39392
Arid3b	-0.227328	0.641418	-0.327964
Uggt1	-0.105023	0.642868	-0.151515
Atxn7l3b	0.0276308	0.642944	0.0398628
Cxxc5	-0.0394976	0.643189	-0.0569829
Slc22a17	-0.0861759	0.643458	-0.124326
Rgl1	-0.266718	0.645256	-0.384793
Rnf11	0.0306416	0.646994	0.0442064
Rapgef6	-0.0929203	0.651633	-0.134056
Foxp1	-0.127636	0.653837	-0.184139
Dnm1l	0.0490029	0.654678	0.0706962
Iars2	-0.0939146	0.657282	-0.13549
Plod3	-0.00620866	0.659081	-0.0089572
Cabin1	-0.0494361	0.662496	-0.0713211
Gnpat	0.051342	0.665797	0.0740709
Usp22	-0.0635256	0.666497	-0.0916481
Prkcb	-0.0225632	0.674598	-0.0325518
Rpl30	0.181266	0.676436	0.261511
Arl5a	-0.220714	0.676666	-0.318423
Parvg	-0.0899899	0.682857	-0.129828
Timm10b	0.08623	0.686093	0.124404
Arhgef7	0.0885966	0.687375	0.127818
Glrx3	0.123188	0.687414	0.177723
Nos1ap	-0.268531	0.68861	-0.387408
Ubfd1	-0.0741145	0.693089	-0.106925
Wbp11	-0.00982447	0.6945	-0.0141737
Derl2	-0.112786	0.695996	-0.162716
Ndufs2	0.0684798	0.697673	0.0987955
Dmxl1	-0.00377308	0.701463	-0.0054434
Ogdh	0.0173889	0.701713	0.0250868
Acsl5	-0.133813	0.703413	-0.193051
Hps1	0.141388	0.704484	0.203979
Rpl41	0.0680241	0.70546	0.0981381
Mga	0.079187	0.71622	0.114243
Rexo1	-0.0818315	0.722063	-0.118058
Psmb2	0.149455	0.72232	0.215618
[truncated: 10,092 more rows]

## Sheet: INTERACTOME GENE
Gene symbol
ACACA
ADAM10
ADRB2
AKT3
ARRDC4
AXL
BCL2
BIN1
CD244
CD2AP
CD300LF
CD33
CD9
CKB
CSF1R
CTNNB1
CYBA
CYBB
CYTH1
DAB2
DUSP3
EEF2K
EGLN3
ETS1
FCER1G
FCGR2B
FGR
FLT1
GRB2
HCK
HIF1A
HNRNPA2B1
HNRNPR
HSP90AA1
HSPA4
IL6ST
INPP5D
IQGAP1
ITGA6
LAT2
LDHB
LGALS3BP
MAPK14
MITF
NCF1
PAK1
PHLPP2
PKM
PLCG2
PLD1
PPP3CA
PRKCD
PTEN
PTPN6
PTPRA
PTPRC
RAF1
RGS11
RPLP2
RPS15A
RPS6KA1
RPTOR
SH3BP1
SH3BP2
SNTA1
SOCS6
SRSF5
SYK
TEC
TGFBR2
WDR44
WWP1

## Sheet: INTERACTOME PPI
Protein A	Protein B
ACACA	LGALS3BP
CD9	LGALS3BP
GRB2	LGALS3BP
HSP90AA1	LGALS3BP
ITGA6	LGALS3BP
ACACA	PRKCD
HSP90AA1	PRKCD
ITGA6	PRKCD
ADRB2	PRKCD
MAPK14	PRKCD
CTNNB1	PRKCD
CYBA	PRKCD
DAB2	PRKCD
HSPA4	PRKCD
IL6ST	PRKCD
INPP5D	PRKCD
PAK1	PRKCD
PKM	PRKCD
ACACA	PTEN
HSP90AA1	PTEN
CTNNB1	PTEN
PKM	PTEN
ETS1	PTEN
LDHB	PTEN
PPP3CA	PTEN
ACACA	RPS6KA1
GRB2	RPS6KA1
HSP90AA1	RPS6KA1
HSPA4	RPS6KA1
LDHB	RPS6KA1
MITF	RPS6KA1
RPLP2	RPS6KA1
ACACA	SOCS6
HSP90AA1	SOCS6
ACACA	EEF2K
MAPK14	EEF2K
HSPA4	EEF2K
RPS6KA1	EEF2K
CKB	EEF2K
HNRNPA2B1	EEF2K
SNTA1	EEF2K
HNRNPR	EEF2K
CD9	ITGA6
GRB2	ITGA6
BIN1	ITGA6
ADRB2	GRB2
MAPK14	GRB2
DAB2	GRB2
ADAM10	GRB2
AXL	GRB2
BIN1	GRB2
CSF1R	GRB2
FCGR2B	GRB2
FLT1	GRB2
GRB2	HNRNPA2B1
ADRB2	HNRNPA2B1
CTNNB1	HNRNPA2B1
GRB2	PPP3CA
ADRB2	PPP3CA
BCL2	PPP3CA
GRB2	PKM
HSP90AA1	PKM
ETS1	PKM
BIN1	PKM
CSF1R	PKM
FLT1	PKM
HIF1A	PKM
GRB2	HSP90AA1
MAPK14	HSP90AA1
HSPA4	HSP90AA1
AXL	HSP90AA1
CSF1R	HSP90AA1
BCL2	HSP90AA1
HIF1A	HSP90AA1
FGR	HSP90AA1
HCK	HSP90AA1
GRB2	PTPN6
CTNNB1	PTPN6
IL6ST	PTPN6
PRKCD	PTPN6
FCGR2B	PTPN6
CD33	PTPN6
GRB2	SYK
MAPK14	SYK
INPP5D	SYK
PKM	SYK
ETS1	SYK
RPS6KA1	SYK
PLCG2	SYK
FGR	SYK
CD33	SYK
PTPN6	SYK
DUSP3	SYK
FCER1G	SYK
SH3BP2	SYK
GRB2	RPLP2
MAPK14	RPLP2
CTNNB1	RPLP2
PTEN	RPLP2
GRB2	IQGAP1
MAPK14	IQGAP1
CTNNB1	IQGAP1
DAB2	IQGAP1
CYBB	IQGAP1
TGFBR2	IQGAP1
GRB2	INPP5D
DAB2	INPP5D
CSF1R	INPP5D
FCGR2B	INPP5D
FGR	INPP5D
HCK	INPP5D
GRB2	PAK1
HSP90AA1	PAK1
CTNNB1	PAK1
FGR	PAK1
GRB2	PTPRC
CTNNB1	PTPRC
PTPN6	PTPRC
GRB2	PLCG2
FLT1	PLCG2
HCK	PLCG2
FCER1G	PLCG2
GRB2	IL6ST
HCK	IL6ST
GRB2	PTPRA
PRKCD	PTPRA
GRB2	RPS15A
HSP90AA1	RPS15A
PTEN	RPS15A
RPLP2	RPS15A
GRB2	SH3BP2
PLCG2	SH3BP2
PTPN6	SH3BP2
GRB2	SNTA1
GRB2	TEC
PLCG2	TEC
PTPRC	TEC
GRB2	LAT2
PLCG2	LAT2
SYK	LAT2
GRB2	HNRNPR
RPS6KA1	HNRNPR
SRSF5	HNRNPR
GRB2	CD2AP
INPP5D	CD2AP
HNRNPR	CD2AP
HCK	CD2AP
IQGAP1	CD2AP
GRB2	CD244
INPP5D	CD244
PLCG2	CD244
PTPN6	CD244
SH3BP2	CD244
GRB2	WDR44
TGFBR2	WDR44
HSP90AA1	RGS11
ADRB2	RGS11
SNTA1	RGS11
HSP90AA1	RAF1
HSPA4	RAF1
PAK1	RAF1
PKM	RAF1
PRKCD	RAF1
BCL2	RAF1
HSP90AA1	TGFBR2
CTNNB1	TGFBR2
DAB2	TGFBR2
PAK1	TGFBR2
FGR	TGFBR2
HSP90AA1	AKT3
PKM	AKT3
PRKCD	AKT3
PTEN	AKT3
TGFBR2	AKT3
HSP90AA1	WWP1
PTEN	WWP1
SYK	WWP1
ADRB2	CD9
ADAM10	CD9
ADRB2	MAPK14
BCL2	MAPK14
ADRB2	ARRDC4
PAK1	ARRDC4
ADRB2	EGLN3
PKM	EGLN3
HIF1A	EGLN3
MAPK14	DUSP3
MAPK14	ETS1
CTNNB1	ETS1
MAPK14	MITF
CTNNB1	MITF
MAPK14	SRSF5
RPS6KA1	SRSF5
HNRNPA2B1	SRSF5
MAPK14	NCF1
CYBA	NCF1
PAK1	NCF1
PRKCD	NCF1
PTEN	NCF1
CYBB	NCF1
CTNNB1	HIF1A
BCL2	HIF1A
CTNNB1	LDHB
CKB	LDHB
HNRNPA2B1	LDHB
CTNNB1	FLT1
CYBA	CYBB
DAB2	FGR
ETS1	FGR
HSPA4	RPTOR
RPS6KA1	RPTOR
HIF1A	RPTOR
IQGAP1	RPTOR
INPP5D	CD300LF
PTPN6	CD300LF
PKM	CYTH1
PRKCD	CYTH1
PPP3CA	PHLPP2
AKT3	PHLPP2
ADAM10	AXL
BIN1	PLD1
HIF1A	PLD1
PLCG2	PLD1
FLT1	HCK
HIF1A	HSPA4
HCK	SH3BP1
CD2AP	SH3BP1

## Sheet: PATHWAY ENRICHMENT
Pathway Term	# Overlapped genes	Adjusted P-value	Overlap Genes
Fc gamma R-mediated phagocytosis	13	7.44905e-16	NCF1;SYK;PRKCD;PLD1;HCK;PAK1;PTPRC;BIN1;INPP5D;AKT3;PLCG2;RAF1;FCGR2B
Osteoclast differentiation	13	6.88458e-14	CSF1R;NCF1;SYK;CYBA;MITF;MAPK14;TGFBR2;PPP3CA;TEC;AKT3;PLCG2;GRB2;FCGR2B
B cell receptor signaling pathway	9	2.36447e-10	PPP3CA;SYK;INPP5D;AKT3;PLCG2;PTPN6;GRB2;RAF1;FCGR2B
Pathways in cancer	16	2.34488e-09	CSF1R;HSP90AA1;EGLN3;PTEN;MITF;ETS1;HIF1A;TGFBR2;AKT3;PLCG2;BCL2;CTNNB1;ITGA6;GRB2;IL6ST;RAF1
T cell receptor signaling pathway	9	3.20554e-09	PPP3CA;PAK1;PTPRC;TEC;AKT3;GRB2;PTPN6;RAF1;MAPK14
Fc epsilon RI signaling pathway	8	3.23339e-09	FCER1G;SYK;INPP5D;AKT3;PLCG2;GRB2;RAF1;MAPK14
C-type lectin receptor signaling pathway	9	5.83887e-09	PPP3CA;PAK1;FCER1G;SYK;AKT3;PRKCD;PLCG2;RAF1;MAPK14
Natural killer cell mediated cytotoxicity	9	8.17281e-09	PPP3CA;PAK1;FCER1G;SYK;SH3BP2;PLCG2;GRB2;PTPN6;RAF1
Proteoglycans in cancer	10	5.28645e-08	PAK1;AKT3;PLCG2;CTNNB1;GRB2;PTPN6;IQGAP1;RAF1;MAPK14;HIF1A
Renal cell carcinoma	7	7.20734e-08	PAK1;EGLN3;AKT3;GRB2;RAF1;ETS1;HIF1A
PI3K-Akt signaling pathway	12	7.20734e-08	RPTOR;PHLPP2;CSF1R;HSP90AA1;FLT1;SYK;AKT3;PTEN;BCL2;ITGA6;GRB2;RAF1
Kaposi sarcoma-associated herpesvirus infection	10	7.20734e-08	PPP3CA;HCK;SYK;AKT3;PLCG2;CTNNB1;IL6ST;RAF1;MAPK14;HIF1A
MAPK signaling pathway	11	9.94742e-08	PPP3CA;CSF1R;PAK1;FLT1;DUSP3;AKT3;RPS6KA1;GRB2;RAF1;MAPK14;TGFBR2
Neurotrophin signaling pathway	8	1.45024e-07	AKT3;RPS6KA1;PRKCD;PLCG2;BCL2;GRB2;RAF1;MAPK14
Focal adhesion	9	4.34598e-07	PAK1;FLT1;AKT3;PTEN;BCL2;CTNNB1;ITGA6;GRB2;RAF1
Prostate cancer	7	5.95185e-07	HSP90AA1;AKT3;PTEN;BCL2;CTNNB1;GRB2;RAF1
Phospholipase D signaling pathway	8	6.09923e-07	FCER1G;SYK;AKT3;PLCG2;GRB2;RAF1;PLD1;CYTH1
AGE-RAGE signaling pathway in diabetic complications	7	7.00319e-07	AKT3;PRKCD;PLCG2;BCL2;CYBB;MAPK14;TGFBR2
HIF-1 signaling pathway	7	8.12474e-07	EGLN3;FLT1;AKT3;PLCG2;BCL2;CYBB;HIF1A
Ras signaling pathway	9	1.25716e-06	CSF1R;PAK1;FLT1;AKT3;PLCG2;GRB2;RAF1;PLD1;ETS1
Tuberculosis	8	1.94613e-06	PPP3CA;FCER1G;SYK;AKT3;BCL2;RAF1;MAPK14;FCGR2B
Sphingolipid signaling pathway	7	2.34876e-06	FCER1G;AKT3;PTEN;BCL2;RAF1;PLD1;MAPK14
Autophagy	7	3.09943e-06	RPTOR;AKT3;PRKCD;PTEN;BCL2;RAF1;HIF1A
Chemokine signaling pathway	8	3.68791e-06	FGR;HCK;PAK1;NCF1;AKT3;PRKCD;GRB2;RAF1
Colorectal cancer	6	4.98742e-06	AKT3;BCL2;CTNNB1;GRB2;RAF1;TGFBR2
Fluid shear stress and atherosclerosis	7	5.22756e-06	HSP90AA1;NCF1;AKT3;BCL2;CTNNB1;CYBA;MAPK14
Th17 cell differentiation	6	1.10289e-05	PPP3CA;HSP90AA1;IL6ST;MAPK14;HIF1A;TGFBR2
JAK-STAT signaling pathway	7	1.14079e-05	AKT3;BCL2;GRB2;PTPN6;IL6ST;RAF1;SOCS6
VEGF signaling pathway	5	1.14079e-05	PPP3CA;AKT3;PLCG2;RAF1;MAPK14
Endometrial cancer	5	1.14079e-05	AKT3;PTEN;CTNNB1;GRB2;RAF1
Hepatocellular carcinoma	7	1.45096e-05	AKT3;PTEN;PLCG2;CTNNB1;GRB2;RAF1;TGFBR2
Central carbon metabolism in cancer	5	1.75007e-05	PKM;AKT3;PTEN;RAF1;HIF1A
Leukocyte transendothelial migration	6	1.81752e-05	NCF1;PLCG2;CYBB;CTNNB1;CYBA;MAPK14
Leishmaniasis	5	2.06896e-05	NCF1;CYBB;CYBA;PTPN6;MAPK14
Cellular senescence	7	2.16275e-05	PPP3CA;AKT3;PTEN;RAF1;MAPK14;ETS1;TGFBR2
Prolactin signaling pathway	5	2.7917e-05	AKT3;GRB2;RAF1;SOCS6;MAPK14
Glioma	5	3.32274e-05	AKT3;PTEN;PLCG2;GRB2;RAF1
FoxO signaling pathway	6	3.50038e-05	AKT3;PTEN;GRB2;RAF1;MAPK14;TGFBR2
Estrogen signaling pathway	6	3.71811e-05	HSP90AA1;AKT3;PRKCD;BCL2;GRB2;RAF1
Signaling pathways regulating pluripotency of stem cells	6	4.1156e-05	AKT3;CTNNB1;GRB2;IL6ST;RAF1;MAPK14
ErbB signaling pathway	5	5.23069e-05	PAK1;AKT3;PLCG2;GRB2;RAF1
Gastric cancer	6	6.57268e-05	AKT3;BCL2;CTNNB1;GRB2;RAF1;TGFBR2
GnRH signaling pathway	5	6.82363e-05	PRKCD;GRB2;RAF1;PLD1;MAPK14
Progesterone-mediated oocyte maturation	5	6.82363e-05	HSP90AA1;AKT3;RPS6KA1;RAF1;MAPK14
mTOR signaling pathway	6	7.12203e-05	RPTOR;AKT3;RPS6KA1;PTEN;GRB2;RAF1
Human immunodeficiency virus 1 infection	7	8.46942e-05	PPP3CA;PAK1;AKT3;PLCG2;BCL2;RAF1;MAPK14
Hepatitis B	6	9.39873e-05	AKT3;BCL2;GRB2;RAF1;MAPK14;TGFBR2
Choline metabolism in cancer	5	9.92734e-05	AKT3;GRB2;RAF1;PLD1;HIF1A
Glucagon signaling pathway	5	0.000112306	PPP3CA;LDHB;PKM;AKT3;ACACA
Thyroid hormone signaling pathway	5	0.000195592	AKT3;PLCG2;CTNNB1;RAF1;HIF1A
Platelet activation	5	0.000284986	FCER1G;SYK;AKT3;PLCG2;MAPK14
Non-small cell lung cancer	4	0.000298255	AKT3;PLCG2;GRB2;RAF1
NOD-like receptor signaling pathway	6	0.000298637	HSP90AA1;PRKCD;BCL2;CYBB;CYBA;MAPK14
Rap1 signaling pathway	6	0.00032591	CSF1R;FLT1;AKT3;CTNNB1;RAF1;MAPK14
Relaxin signaling pathway	5	0.000329511	AKT3;GRB2;RAF1;MAPK14;TGFBR2
Acute myeloid leukemia	4	0.000329511	CSF1R;AKT3;GRB2;RAF1
Adherens junction	4	0.000375544	CTNNB1;PTPN6;IQGAP1;TGFBR2
Melanoma	4	0.000375544	AKT3;PTEN;MITF;RAF1
Insulin signaling pathway	5	0.000406196	RPTOR;AKT3;GRB2;RAF1;ACACA
Pancreatic cancer	4	0.000425419	AKT3;RAF1;PLD1;TGFBR2
Chronic myeloid leukemia	4	0.000440497	AKT3;GRB2;RAF1;TGFBR2
Breast cancer	5	0.000502096	AKT3;PTEN;CTNNB1;GRB2;RAF1
Human papillomavirus infection	7	0.000807322	PKM;AKT3;PTEN;CTNNB1;ITGA6;GRB2;RAF1
Human cytomegalovirus infection	6	0.000807322	PPP3CA;AKT3;CTNNB1;GRB2;RAF1;MAPK14
Small cell lung cancer	4	0.000861845	AKT3;PTEN;BCL2;ITGA6
Pyruvate metabolism	3	0.000861845	LDHB;PKM;ACACA
Hematopoietic cell lineage	4	0.000907914	CSF1R;CD9;ITGA6;CD33
Endocytosis	6	0.00100973	DAB2;BIN1;WWP1;PLD1;CYTH1;TGFBR2
MicroRNAs in cancer	6	0.00125301	RPTOR;PTEN;PLCG2;BCL2;GRB2;RAF1
Toxoplasmosis	4	0.00147043	AKT3;BCL2;ITGA6;MAPK14
Insulin resistance	4	0.00155332	AKT3;RPS6KA1;PRKCD;PTEN
Amyotrophic lateral sclerosis (ALS)	3	0.00199633	PPP3CA;BCL2;MAPK14
cAMP signaling pathway	5	0.00222156	PAK1;AKT3;ADRB2;RAF1;PLD1
AMPK signaling pathway	4	0.0024746	RPTOR;EEF2K;AKT3;ACACA
Epstein-Barr virus infection	5	0.00310937	SYK;AKT3;PLCG2;BCL2;MAPK14
Long-term potentiation	3	0.0039445	PPP3CA;RPS6KA1;RAF1
Human T-cell leukemia virus 1 infection	5	0.00407306	PPP3CA;AKT3;PTEN;ETS1;TGFBR2
Adrenergic signaling in cardiomyocytes	4	0.00424206	AKT3;BCL2;ADRB2;MAPK14
Inositol phosphate metabolism	3	0.00485143	INPP5D;PTEN;PLCG2
Hepatitis C	4	0.00548688	AKT3;CTNNB1;GRB2;RAF1
cGMP-PKG signaling pathway	4	0.0070259	PPP3CA;AKT3;ADRB2;RAF1
Axon guidance	4	0.00806181	PPP3CA;PAK1;PLCG2;RAF1
Phagosome	4	0.00806181	NCF1;CYBB;CYBA;FCGR2B
Transcriptional misregulation in cancer	4	0.0084467	CSF1R;FLT1;MITF;TGFBR2
Phosphatidylinositol signaling system	3	0.0103424	INPP5D;PTEN;PLCG2
Propanoate metabolism	2	0.0106578	LDHB;ACACA
Melanogenesis	3	0.0106879	CTNNB1;MITF;RAF1
NF-kappa B signaling pathway	3	0.0111627	SYK;PLCG2;BCL2
Chagas disease (American trypanosomiasis)	3	0.0113394	AKT3;MAPK14;TGFBR2
Parathyroid hormone synthesis, secretion and action	3	0.0124572	BCL2;RAF1;PLD1
Regulation of actin cytoskeleton	4	0.0141458	PAK1;ITGA6;IQGAP1;RAF1
Viral carcinogenesis	4	0.0168298	PKM;SYK;GRB2;IL6ST
Thermogenesis	4	0.0171501	RPTOR;RPS6KA1;GRB2;MAPK14
Inflammatory mediator regulation of TRP channels	3	0.0190367	PRKCD;PLCG2;MAPK14
Dopaminergic synapse	3	0.0222005	PPP3CA;AKT3;MAPK14
Type II diabetes mellitus	2	0.0222673	PKM;PRKCD
Apoptosis	3	0.024421	AKT3;BCL2;RAF1
Measles	3	0.0255637	AKT3;BCL2;FCGR2B
Regulation of lipolysis in adipocytes	2	0.0289403	AKT3;ADRB2
Oxytocin signaling pathway	3	0.0299157	PPP3CA;EEF2K;RAF1
Hippo signaling pathway	3	0.0322087	PAK1;CTNNB1;TGFBR2
Mitophagy	2	0.0350528	MITF;HIF1A
Influenza A	3	0.0364537	AKT3;RAF1;MAPK14
Glycolysis / Gluconeogenesis	2	0.0385641	LDHB;PKM
Necroptosis	3	0.0403248	HSP90AA1;BCL2;CYBB
p53 signaling pathway	2	0.0421367	PTEN;BCL2
Arrhythmogenic right ventricular cardiomyopathy (ARVC)	2	0.0428372	CTNNB1;ITGA6
Bacterial invasion of epithelial cells	2	0.044643	CTNNB1;CD2AP
Renin secretion	2	0.0461828	PPP3CA;ADRB2
Calcium signaling pathway	3	0.0461828	PPP3CA;PLCG2;ADRB2

## Sheet: DISEASE GENE
Gene symbol (AD-assocated genes)
CSF1R
NCF1
PTEN
ADRB2
PLD1
HIF1A
PPP3CA
PAK1
EEF2K
INPP5D
PLCG2
CKB
SOCS6
CD33
HSP90AA1
HSPA4
CYBB
ADAM10
MAPK14
TGFBR2
CD2AP
PTPRC
BIN1
PTPRA
HNRNPA2B1
BCL2
CTNNB1
GRB2
SRSF5
IL6ST
RAF1

## Sheet: GPSnet_parameter
	top 0.00010	top 0.00020	top 0.00030	top 0.00040	top 0.00050
0	245	293	328	388	420
0.1	170	164	174	180	170
0.2	141	148	138	130	132
0.3	129	127	126	126	124
0.4	124	126	124	122	119
0.5	119	119	116	114	108
0.6	115	113	109	99	98
0.7	109	103	99	95	95
0.8	103	86	87	90	89
0.9	77	77	76	72	72
