# Supplementary material for: Multimodal single-cell/nucleus RNA sequencing data analysis uncovers molecular networks between disease-associated microglia and astrocytes with implications for drug repurposing in Alzheimer's disease
Source: HighWire-hosted journal article supplement (doi:10.1101/gr.272484.120), 2021-02-24
Supplement: Supplemental_Table_S5.zip [file Supplemental_Table_S5.xlsx]

## Sheet: DESCRIPTION
Supplemental Table S5. Disease molecular network results for a mouse scRNA-seq dataset (GSE98969).
PATHWAY ENRICHMENT	Enrichr/Pathways/KEGG 2019 Mouse (FDR < 0.05)
DISEASE GENE	Enrichr/Diseases or Drugs/DisGeNET (Alzheimer's Disease, FDR < 0.05)

## Sheet: DEG
mouse gene symbol	avg_logFC	p_val_adj	avg_log2FC
Cst7	2.71481	2.88e-202	3.91664
Apoe	2.34706	6.3e-200	3.38608
Lpl	2.25011	7.26e-134	3.24623
Ctsd	0.906329	2.42e-109	1.30756
Clec7a	1.72689	3.81e-86	2.49138
Ctsb	0.910052	8.89e-84	1.31293
Tyrobp	0.946655	2.55e-83	1.36573
Lyz2	1.33134	5.52e-76	1.92072
P2ry12	-0.951995	1.79e-75	-1.37344
Ccl3	1.90095	2.19e-65	2.7425
Axl	1.41426	1.05e-61	2.04034
Gnas	1.08147	1.3e-61	1.56024
Itgax	1.3194	4.07e-58	1.90348
Ccl6	1.48716	1.29e-56	2.14552
Spp1	1.6765	5.51e-56	2.41868
Ank	1.398	1.25e-55	2.01689
Fth1	0.788886	8.08e-53	1.13812
Cd9	0.802787	1.75e-48	1.15818
Tmem119	-0.924209	1.25e-47	-1.33335
Selplg	-0.632006	2.03e-45	-0.911792
Igf1	1.15715	1.01e-43	1.66942
Fam20c	1.24822	2.31e-43	1.80079
Csf1	1.28534	1.88e-40	1.85435
Ctsz	0.703484	1.45e-38	1.01491
Cx3cr1	-0.533096	1.61e-37	-0.769095
Cd63	0.982017	2.71e-37	1.41675
mmu-mir-703	0.608148	1.31e-31	0.877371
Ccl4	1.35277	2.27e-31	1.95164
B2m	0.506209	3.01e-31	0.730306
Cd63-ps	0.861594	4.63e-28	1.24302
Cd68	0.706023	4.89e-27	1.01858
Serpine2	0.766187	6.26e-27	1.10537
Ctsl	0.615431	7.58e-27	0.88788
Gusb	0.80571	2.8e-23	1.16239
Ch25h	0.785585	5.19e-23	1.13336
AC151602.1	0.609601	1.42e-22	0.879468
Cd52	0.857799	2.42e-22	1.23754
Lgi2	0.854575	6.9e-22	1.23289
Serinc3	-0.422196	4.32e-21	-0.6091
Gm10076	0.636283	7.7e-21	0.917963
Trem2	0.617681	1.83e-20	0.891125
Hexa	0.598773	2.11e-17	0.863847
Malat1	-0.719863	2.58e-17	-1.03854
Lgals3bp	0.758441	4.99e-17	1.0942
Marcks	-0.468977	8.09e-17	-0.676591
Glul	-0.613187	1.02e-16	-0.884642
Gm7331	0.614752	1.58e-16	0.886899
Rpsa-ps10	0.600796	2.38e-16	0.866765
4632428N05Rik	-0.546852	4.06e-16	-0.788941
Npc2	0.533817	7.39e-16	0.770135
Cox6a2	0.602224	7.71e-16	0.868826
Rplp1	0.506654	1.14e-15	0.730948
Gm15772	0.54557	4.75e-15	0.787091
Gm13456	0.521302	5.63e-15	0.75208
Rpsa	0.506339	6.65e-15	0.730493
Gm16238	0.530382	7.63e-15	0.76518
Gm5559	0.574164	1.22e-14	0.828344
Syngr1	0.578137	2.06e-14	0.834075
Aldoa	0.456094	2.23e-14	0.658005
H2-D1	0.578598	2.72e-14	0.834741
Gm10925	0.513077	3.02e-14	0.740214
Ramp1	0.487547	3.84e-14	0.703381
Capg	0.577241	5.36e-14	0.832783
Gm5054	0.531286	6.75e-14	0.766484
Hpse	0.460936	2.08e-13	0.664991
Lgmn	-0.33415	3.36e-13	-0.482076
Cox6a1	0.655564	5.03e-13	0.945779
Timp2	0.50415	1.31e-12	0.727335
Kcnj2	0.622966	1.67e-12	0.89875
Gm15500	0.510584	3.13e-12	0.736618
Ctsa	0.541937	3.53e-12	0.78185
Cd34	0.655512	4.09e-12	0.945704
Pld3	0.544032	4.64e-12	0.784873
Maf	-0.77539	4.87e-12	-1.11865
5430435G22Rik	0.468468	5.34e-12	0.675856
Mif	0.551318	6.89e-12	0.795384
Lilrb4	0.629302	7.14e-12	0.907891
ERCC-00096	-0.187225	1.36e-11	-0.270108
Hif1a	0.742405	1.48e-11	1.07106
Gm14456	0.441348	2.1e-11	0.63673
Cadm1	0.494144	2.34e-11	0.712899
Gm4149	0.445369	2.64e-11	0.642531
Mpeg1	0.39391	2.7e-11	0.568292
Psat1	0.573403	4.97e-11	0.827245
Slco2b1	-0.560828	6.42e-11	-0.809103
ERCC-00002	-0.184914	1.59e-10	-0.266774
ERCC-00130	-0.158651	2.85e-10	-0.228885
Cd83	0.661345	3.58e-10	0.95412
Gm8730	0.505583	3.86e-10	0.729403
Pabpc1	0.573888	5.05e-10	0.827946
P2ry13	-0.487567	6.01e-10	-0.70341
Eef1b2	0.453508	6.29e-10	0.654273
Csf1r	-0.270656	7.54e-10	-0.390473
Rplp2	0.47227	9.32e-10	0.681342
Sulf2	0.552969	1.19e-09	0.797766
Gm13340	0.533914	1.27e-09	0.770275
Gm15710	0.408436	1.37e-09	0.589249
Gm10154	0.341642	1.45e-09	0.492885
Baiap2l2	0.359745	1.48e-09	0.519002
Gm11410	0.450996	1.65e-09	0.65065
Lpcat2	-0.52812	1.97e-09	-0.761916
Fam46c	0.536788	2.07e-09	0.774421
Myo1e	0.504482	2.1e-09	0.727813
Grn	0.408622	2.46e-09	0.589517
Ndufa1	0.542854	2.58e-09	0.783172
Gm13408	0.411732	3.48e-09	0.594004
Gm5963	0.457637	3.59e-09	0.66023
Cd164	-0.588712	4.6e-09	-0.849332
Siglech	-0.402238	4.99e-09	-0.580307
Gm13192	0.396387	6.42e-09	0.571866
Gm10073	0.469499	6.7e-09	0.677345
Gm6030	0.357396	7.7e-09	0.515613
Gm10269	0.378013	9.71e-09	0.545357
Cox4i1	0.277941	9.81e-09	0.400984
Gm3511	0.314977	1.07e-08	0.454416
Csf2ra	0.237575	1.11e-08	0.342749
Srgap2	-0.700542	1.19e-08	-1.01067
Gm9000	0.387566	1.22e-08	0.55914
Gm15427	0.36172	1.23e-08	0.521851
Nceh1	0.602939	1.27e-08	0.869856
Gm11361	0.464527	1.84e-08	0.670171
Pea15a	0.543294	1.85e-08	0.783807
2810422J05Rik	0.300144	2.5e-08	0.433016
Entpd1	-0.684491	2.69e-08	-0.987511
Mir682	0.36864	2.8e-08	0.531835
Gm13436	0.387411	3.75e-08	0.558916
Gm11263	0.368335	4.25e-08	0.531395
Rplp2-ps1	0.417507	4.26e-08	0.602335
Lrpap1	0.420393	4.55e-08	0.606499
Pkm2	0.661029	4.85e-08	0.953663
Gm10443	0.394766	5.87e-08	0.569527
AC119211.1	0.373914	6.27e-08	0.539444
Ifi27l2b	0.5897	7.16e-08	0.850757
Gm8759	0.327833	7.59e-08	0.472963
Anxa5	0.522295	7.84e-08	0.753512
Il4i1	0.470334	8.33e-08	0.678548
Gm12630	0.31374	8.39e-08	0.452631
Gpr34	-0.358207	1.1e-07	-0.516783
Gm10186	0.441567	1.11e-07	0.637046
Cxcl16	0.5501	1.13e-07	0.793626
Gm15430	0.406083	1.19e-07	0.585854
Gm11428	0.730302	1.34e-07	1.0536
Gm10136	0.321354	1.35e-07	0.463616
Cox8a	0.452748	1.35e-07	0.653178
ERCC-00004	-0.169337	1.52e-07	-0.244302
Gm7363	0.365823	2.17e-07	0.527771
ERCC-00171	-0.244411	2.23e-07	-0.352611
Atp1a3	0.333473	2.47e-07	0.481099
Sall1	-0.615215	3.14e-07	-0.887568
Gm9843	0.447872	3.46e-07	0.646142
Anxa3	0.483212	3.7e-07	0.697127
Creg1	0.487251	4.27e-07	0.702954
Gpr65	0.632251	4.92e-07	0.912146
ERCC-00113	-0.179765	6.06e-07	-0.259346
Crlf2	0.446394	6.39e-07	0.64401
ERCC-00074	-0.139109	7.52e-07	-0.200692
Rhob	-0.482384	8.4e-07	-0.695933
Gm13048	0.323507	1.12e-06	0.466722
Gm13532	0.287151	1.23e-06	0.414271
Scd2	0.55805	1.36e-06	0.805096
Gm2000	0.345708	1.43e-06	0.498752
Txnip	-0.585468	1.5e-06	-0.844652
Tpi1	0.394032	1.69e-06	0.568467
Unc93b1	-0.380341	1.94e-06	-0.548716
Tmem173	-0.637532	1.98e-06	-0.919764
Myo5a	0.520926	2.24e-06	0.751537
Gm11741	0.179295	3.46e-06	0.258669
Aplp2	0.579098	3.61e-06	0.835462
Ephx1	0.373129	3.63e-06	0.538312
Atp6v0c	0.328768	3.65e-06	0.474312
Rplp0	0.381612	3.87e-06	0.55055
Slamf9	0.395946	4.09e-06	0.571229
Gm14303	0.285271	4.3e-06	0.411559
Gm5805	0.295917	4.56e-06	0.426918
Gm10059	0.297221	5.87e-06	0.428799
Tmed3	0.414603	6.74e-06	0.598146
Gm6863	0.213481	7.76e-06	0.307988
Gm5239	0.397778	8.26e-06	0.573873
Adssl1	0.515964	8.35e-06	0.744379
Nrp1	0.407139	9.46e-06	0.587377
Olfml3	-0.342122	1.02e-05	-0.493578
Gm13826	0.263611	1.04e-05	0.38031
Gm12005	0.212248	1.29e-05	0.306209
Gm4604	0.382593	1.38e-05	0.551965
Atp1b3	0.434584	1.39e-05	0.626972
Plbd2	0.285147	1.48e-05	0.41138
Mt1	0.460703	1.57e-05	0.664654
Scamp2	-0.503789	1.59e-05	-0.726813
H2-K1	0.382629	1.69e-05	0.552017
Tspo	0.420099	1.7e-05	0.606075
Atf3	0.429204	2.01e-05	0.619211
Cmtm6	-0.520387	2.14e-05	-0.75076
Gm10294	0.452154	2.32e-05	0.65232
Tpt1	0.310327	2.38e-05	0.447707
Cpd	0.449625	2.53e-05	0.648672
Gm5244	0.33424	2.75e-05	0.482207
Gm10689	0.27161	2.76e-05	0.39185
Gm13226	0.280052	2.86e-05	0.40403
Calm2	-0.476124	2.92e-05	-0.686902
Gba	0.195567	3e-05	0.282144
Gm11478	0.283857	3.05e-05	0.409519
Shisa5	0.451688	3.5e-05	0.651648
Gm10288	0.235003	3.52e-05	0.339038
Scpep1	0.302612	3.91e-05	0.436577
Gm11942	0.350026	3.92e-05	0.504981
Apbb2	0.491355	4.06e-05	0.708876
Npm1	0.375541	5.39e-05	0.541792
Akr1a4	0.413487	5.52e-05	0.596535
Ecscr	-0.72572	5.8e-05	-1.04699
Dad1	0.325567	5.85e-05	0.469693
Gm10086	0.257791	7.18e-05	0.371914
Vps13c	0.378538	7.21e-05	0.546115
Ifngr1	-0.510622	7.97e-05	-0.736672
Slc11a1	0.422744	9.01e-05	0.609891
Ldha	0.353255	9.12e-05	0.509639
Cd74	0.507055	9.52e-05	0.731526
Eef1a1	0.333619	9.81e-05	0.481311
Chst11	0.353663	0.000100779	0.510229
Ssr4	0.349274	0.000101149	0.503897
Sparc	-0.232739	0.000120676	-0.335772
Slc2a5	-0.632824	0.00012403	-0.912972
Naca	0.183962	0.000130632	0.265401
AL663027.1	0.354475	0.000151692	0.5114
AL928935.1	0.289347	0.000181311	0.417439
Ivns1abp	-0.491872	0.000197231	-0.709622
ERCC-00136	-0.14161	0.000217357	-0.204299
Gm16477	0.267937	0.000229415	0.386551
Gm10116	0.255815	0.000240752	0.369063
Gm15536	0.0702265	0.000289512	0.101315
Eef2	0.310132	0.000298377	0.447425
Rpsa-ps9	0.214005	0.000302479	0.308743
Gm1673	0.46044	0.000327377	0.664274
Gm10222	0.414937	0.000352407	0.598628
Lipa	0.176867	0.00037551	0.255166
Pgam1	0.320711	0.000397067	0.462688
Cstb	0.433795	0.000434806	0.625834
Atp6v0e	0.258601	0.000437559	0.373082
Gm2a	0.349006	0.000465817	0.50351
Slc40a1	-0.695392	0.00047573	-1.00324
Gm11808	0.242281	0.00049571	0.349538
Sdf4	0.348762	0.000559498	0.503156
Tmem176b	0.151224	0.000575924	0.218171
Gm15590	0.309021	0.000603508	0.445823
Sh3bgrl3	0.417278	0.000687862	0.602005
Fabp5	0.251702	0.000723057	0.363129
Gm11518	0.192132	0.000724973	0.277188
Fxyd5	0.454116	0.000824907	0.655151
Calr	0.322241	0.000840532	0.464895
Gm10012	0.228265	0.000854917	0.329316
Dnajb14	0.402452	0.000948283	0.580615
Plaur	0.212257	0.000970159	0.306222
9530068E07Rik	0.136281	0.000985956	0.196612
Cox7a2l	0.306196	0.00101748	0.441748
RP24-92H14.2	0.210226	0.00103692	0.303292
Lyn	-0.376977	0.00118283	-0.543864
Rgs2	-0.385641	0.00128872	-0.556363
Hsp90ab1	0.300413	0.00129183	0.433404
Gm10119	0.347371	0.0013116	0.50115
Dpp7	0.246408	0.00134284	0.355491
Ndufa6	0.395648	0.00139248	0.5708
Ptma	0.291456	0.00139346	0.420482
Taf10	0.203687	0.00145657	0.293858
Gm13341	0.415779	0.00157089	0.599843
Gas2l3	0.259553	0.00163715	0.374456
Cox6b1	0.231223	0.00171686	0.333584
Gm12174	0.285868	0.00177027	0.41242
Wasf2	-0.541613	0.00181358	-0.781382
Uqcr11	0.333751	0.00187212	0.481501
S1pr1	0.19392	0.00197987	0.279767
Ptgs1	-0.414338	0.00202299	-0.597764
Pde3b	-0.555445	0.00208363	-0.801338
Gm16247	0.363812	0.00221482	0.52487
Pdcd1	0.206413	0.00223698	0.29779
Gpr84	0.281791	0.00237343	0.406538
Tmem176a	0.385266	0.00258975	0.555821
Ost4	0.283143	0.00262566	0.408489
Gstm5	0.201152	0.00263758	0.290201
Frmd4a	-0.569701	0.00266168	-0.821904
Ccr5	-0.419592	0.00267876	-0.605344
Sdf2l1	0.373012	0.00282304	0.538143
Fcer1g	0.241652	0.00289937	0.34863
Cotl1	0.383748	0.00304076	0.553632
Crybb1	-0.597182	0.00377787	-0.861552
Ddx5	-0.383939	0.00378267	-0.553908
Fgr	0.288527	0.00381971	0.416256
Gm15148	0.222663	0.00406142	0.321235
Cnot2	-0.63224	0.00415989	-0.91213
Comt	-0.282859	0.00433312	-0.408079
Atp6v1f	0.286846	0.0043975	0.413831
Ppt1	0.324679	0.00441418	0.468413
Gm10275	0.113996	0.00459612	0.164461
Gm6202	0.218797	0.0048922	0.315657
Gm13841	0.404469	0.00552548	0.583526
Arpc1b	0.398449	0.00567972	0.574841
Gnb2l1	0.211859	0.00578028	0.305648
Fam105a	-0.51266	0.00589236	-0.739611
Atox1	0.341453	0.00622594	0.492612
Glb1	0.336275	0.00656965	0.485142
Pip4k2a	-0.578664	0.00660798	-0.834835
Mamdc2	0.29195	0.00665889	0.421195
Gm7290	0.224926	0.00671335	0.3245
Pld4	-0.322018	0.00678174	-0.464574
Clic4	0.359111	0.00678177	0.518087
Spcs1	0.343396	0.00679058	0.495415
Ggta1	-0.527697	0.00731133	-0.761306
Abi3	-0.391333	0.00810335	-0.564575
Pgk1	0.318217	0.00838963	0.45909
Arhgap5	-0.486666	0.00856664	-0.70211
Ckb	-0.332466	0.00864265	-0.479647
Tlr2	0.451379	0.00865752	0.651202
Tpd52	0.35852	0.00867269	0.517235
Plcl2	-0.622037	0.00873396	-0.89741
Ms4a6b	-0.505902	0.00885108	-0.729862
Gm6286	0.206815	0.00894067	0.29837
Susd3	-0.549607	0.00936983	-0.792915
Lrba	-0.546372	0.00945561	-0.788248
Gng5	0.143434	0.010343	0.206932
Rpn2	0.130269	0.0112895	0.187938
Sel1l	0.0604294	0.0113025	0.0871812
Psme2b-ps	-0.0627657	0.0119174	-0.0905517
Ltc4s	-0.527563	0.0122151	-0.761112
Gm6023	0.202495	0.0123989	0.292138
Ccl12	0.359854	0.0125691	0.51916
Ucp2	0.221024	0.0146256	0.31887
Slc25a3	0.44206	0.0149377	0.637757
Ddost	0.118761	0.0149802	0.171336
Atp5j2	0.179607	0.0149809	0.259118
Dgkz	0.22505	0.0158757	0.324678
Dhrs3	0.251853	0.0163126	0.363347
Flt1	0.223907	0.0165163	0.32303
Gm7079	0.22351	0.0177525	0.322457
Lyz1	0.146742	0.0186539	0.211704
Gm12334	0.180109	0.0187447	0.259842
Pebp1	0.302052	0.0188605	0.435769
Itgb2	0.246747	0.0201104	0.35598
Fgl2	0.122406	0.0207966	0.176594
Tubb6	0.222994	0.0218619	0.321712
Gm10036	0.284951	0.0229913	0.411097
Arpc5	0.0773346	0.0232197	0.11157
Gm9396	0.213582	0.0244767	0.308134
Ppib	0.0242983	0.0265324	0.035055
Gng12	0.333786	0.0269624	0.481552
Mertk	-0.372945	0.0280301	-0.538046
Atp6v1c1	0.413182	0.028503	0.596096
Inpp5d	-0.431814	0.0291408	-0.622976
Plek	0.267185	0.030513	0.385467
Bcl2a1d	0.255506	0.0321535	0.368618
Gm6252	0.160454	0.0343478	0.231487
Arrdc4	0.230539	0.0348621	0.332597
H2-DMa	0.169234	0.0352821	0.244153
Eef1g	0.212532	0.036818	0.306618
Prdx4	0.408632	0.0376944	0.589532
Slc2a1	0.188866	0.0384192	0.272476
Bri3	0.12602	0.0386551	0.181808
ERCC-00046	-0.161349	0.039141	-0.232778
Snn	-0.522979	0.0393698	-0.754499
Gm8430	0.219282	0.0396516	0.316358
Gm9493	0.245879	0.0400221	0.354729
Gm6977	0.216833	0.0400459	0.312824
Hmha1	-0.530702	0.0405928	-0.765642
Gm10260	0.240729	0.0406991	0.347298
Got1	0.150541	0.0410742	0.217185
ERCC-00009	-0.262216	0.0425181	-0.378297
ERCC-00111	-0.213211	0.0430576	-0.307599
Cybb	0.497003	0.0431538	0.717023
Ly86	0.234179	0.0432575	0.337849
Zbtb7a	-0.60377	0.0458058	-0.871056
Ndufb6	0.270533	0.0465707	0.390297
Zfhx3	-0.402576	0.0466817	-0.580795
Gm10243	0.16309	0.0477883	0.235289
6330512M04Rik	0.0284899	0.0482262	0.0411022
Gm8129	0.259836	0.0483054	0.374865
Gsto1	0.191358	0.0484566	0.276071
Bcl2a1a	0.153667	0.0499001	0.221694
Rnase4	-0.283666	0.0504574	-0.409243
0610031J06Rik	0.318589	0.051977	0.459627
Gabarap	0.237515	0.0547159	0.342661
D4Wsu53e	-0.302058	0.0560485	-0.435777
1700017B05Rik	-0.486682	0.0560947	-0.702134
Rassf3	0.41118	0.0562474	0.593207
Ncf1	-0.440492	0.05631	-0.635496
Slc15a3	0.301432	0.0564286	0.434875
Morf4l1	-0.0593359	0.057868	-0.0856036
Rpsa-ps4	0.192048	0.0664224	0.277066
Gm9846	0.18276	0.0669513	0.263667
Atn1	0.427179	0.0674723	0.616289
Glipr1	0.494244	0.0713773	0.713043
Pon3	-0.00145908	0.0740162	-0.00210501
Fscn1	-0.34988	0.0809361	-0.50477
Gm12944	0.264787	0.0816365	0.382007
AC154650.1	0.133163	0.0821961	0.192113
SNORD81	0.0111096	0.0915462	0.0160278
Csnk1e	-0.318014	0.0928447	-0.458797
Rftn1	0.322439	0.0928581	0.465182
Dock10	-0.571503	0.0935505	-0.824504
Fam46a	-0.516516	0.0951457	-0.745175
Fgd2	-0.459903	0.100621	-0.6635
Cox7a2	0.190342	0.10168	0.274605
Rgs10	-0.228754	0.103577	-0.330023
Sema4d	-0.0884211	0.108473	-0.127565
Scoc	-0.436257	0.111172	-0.629386
Atp6ap1	0.117685	0.112319	0.169783
Cxcr4	0.142086	0.121677	0.204987
Man2b1	0.227904	0.12418	0.328796
Lamp1	0.239156	0.126046	0.345029
Cd274	0.214886	0.127044	0.310015
Rnaset2a	0.233614	0.12791	0.337033
ERCC-00145	-0.206261	0.130338	-0.297572
Fau	0.353378	0.131858	0.509816
Il1b	0.179497	0.139802	0.25896
Snord35a	0.246683	0.146753	0.355888
Cd84	0.249626	0.147536	0.360134
7SK	-0.447872	0.151699	-0.646143
Lamp2	0.227527	0.154202	0.328251
Myh9	0.0855085	0.155804	0.123363
Lrrc3	-0.512211	0.161963	-0.738964
Hnrnpc	-0.00550471	0.166413	-0.00794161
Sh2b3	-0.47717	0.171398	-0.688411
Ndufs6	0.248859	0.171477	0.359028
Gm12165	0.222076	0.177378	0.320387
Evi2a	0.246917	0.181781	0.356226
Cd33	-0.499062	0.182459	-0.719994
Tapbp	-0.0349571	0.187089	-0.0504324
Gm4613	0.220445	0.187699	0.318035
Gpr56	-0.332793	0.188147	-0.480119
Anp32b	0.326618	0.196707	0.47121
Adap2	-0.539884	0.205592	-0.778888
Ubl5	0.11136	0.20884	0.160659
Pla2g15	-0.324977	0.209286	-0.468842
Ifi27l2a	0.344199	0.219282	0.496574
Gm7536	0.202886	0.222543	0.292703
Naglu	0.236796	0.224611	0.341625
Gm16020	0.14968	0.225812	0.215943
Galc	0.333027	0.230543	0.480456
Pcna	0.199893	0.234856	0.288384
Hsbp1	-0.0156744	0.241806	-0.0226134
Bhlhe40	0.14674	0.245372	0.211701
Rnasek	0.218612	0.247422	0.31539
Zfp622	0.295946	0.253681	0.426959
1500010J02Rik	-0.588027	0.262843	-0.848343
Elk3	-0.0915995	0.263068	-0.13215
Il16	-0.494029	0.265253	-0.712734
ERCC-00042	-0.256378	0.267416	-0.369875
Oxct1	0.289249	0.279529	0.417298
Gm10159	0.254328	0.281547	0.366918
Itm2c	0.135737	0.293274	0.195827
Tnfrsf1b	-0.442232	0.301996	-0.638006
Gm16418	0.183297	0.307921	0.264442
Cdc42	-0.267656	0.308009	-0.386145
Fbxw4	0.316081	0.308605	0.456009
Sun2	0.0731272	0.317544	0.1055
Tmem66	0.0432249	0.327499	0.0623603
Capzb	0.00055546	0.341483	0.000801359
Ccrl2	0.340022	0.343752	0.490548
Sepp1	-0.231996	0.352708	-0.3347
Ssh2	-0.433431	0.355153	-0.625309
Etl4	0.141611	0.356826	0.204302
Sox4	-0.616501	0.362289	-0.889423
Tpm3	-0.33256	0.36793	-0.479782
Tanc2	-0.492016	0.372446	-0.709828
Hprt	0.111474	0.372499	0.160823
Il6ra	-0.508899	0.37692	-0.734187
Gm8841	0.17777	0.383112	0.256469
Ptpra	0.103962	0.385637	0.149985
Fam102b	-0.366584	0.387136	-0.528868
Brp44l	0.0169212	0.394061	0.0244121
C1qb	-0.15182	0.403736	-0.21903
2410015M20Rik	0.141118	0.407216	0.20359
Gm14059	0.277038	0.413568	0.399682
Ccl9	0.432441	0.417421	0.623881
Hnrnpf	0.128491	0.418266	0.185374
Gltp	0.283254	0.424064	0.408649
Mef2a	-0.401856	0.429559	-0.579755
Gm15501	0.14646	0.437158	0.211297
Tjp1	-0.521077	0.441747	-0.751754
2020-03-01	-0.526739	0.443039	-0.759924
Prdx1	0.269563	0.449128	0.388898
Gpx1	0.18516	0.456985	0.267129
Herc2	-0.210661	0.467749	-0.30392
Usp12	0.281034	0.469695	0.405447
Gm15421	0.177059	0.474914	0.255442
Sdcbp	0.0576322	0.478215	0.0831457
Sash3	-0.383231	0.497819	-0.552886
Csf3r	0.0709561	0.517579	0.102368
Gm10051	0.163994	0.520733	0.236593
Casp8	-0.480297	0.522872	-0.692922
Adamts1	0.17983	0.524059	0.25944
Cd72	0.371261	0.543789	0.535616
Hnrnpul1	-0.0451514	0.545734	-0.0651397
Med28	0.290093	0.56606	0.418516
Tln1	0.0800508	0.568298	0.115489
Ndufa13	0.269705	0.574793	0.389102
Pnp	-0.403703	0.588601	-0.582421
AC115697.1	0.198139	0.594569	0.285855
Haus5	-0.277052	0.601974	-0.399702
Sat1	0.0420415	0.604937	0.060653
Tgm2	-0.392648	0.605037	-0.566472
Perp	0.200489	0.609079	0.289244
C530028O21Rik	0.199361	0.616709	0.287617
Capza2	-0.38804	0.633631	-0.559824
Cttnbp2nl	-0.358473	0.641865	-0.517167
Psme2	0.148376	0.645512	0.214062
BC004004	-0.050168	0.64785	-0.0723772
Rtn1	-0.475277	0.653663	-0.68568
Plekhm2	0.164381	0.666594	0.237151
Zfp706	-0.26165	0.67114	-0.377481
Gm15725	-0.0184245	0.672834	-0.026581
Gm11281	0.199507	0.677697	0.287828
Cyba	0.201646	0.678447	0.290914
Pfdn5	0.222431	0.687482	0.3209
Phyhd1	-0.500048	0.707178	-0.721416
Ndufa3	0.350398	0.724111	0.505518
Gm9294	0.179012	0.726651	0.258259
Suds3	0.0358618	0.734492	0.0517377
Gm15450	0.164608	0.73893	0.237479
Plin2	0.295239	0.77731	0.42594
Tgfb1	-0.0584201	0.792325	-0.0842825
Bank1	-0.441447	0.822604	-0.636873
Cndp2	-0.0162999	0.84445	-0.0235157
Atp2b1	0.0279871	0.852606	0.0403769
2700060E02Rik	-0.0590287	0.854338	-0.0851604
Gm5644	0.170101	0.872921	0.245403
Gdi2	-0.110604	0.878441	-0.159568
Soat1	0.0698626	0.880375	0.10079
Man1c1	0.092696	0.883378	0.133732
St14	0.229217	0.903106	0.33069
Pdcd6	-0.10481	0.912998	-0.151208
Chchd2	0.114727	0.914627	0.165516
Atp5a1	-0.0728815	0.928646	-0.105146
Arap2	0.389071	0.953196	0.561311
Lars2	0.162059	0.973715	0.233802
Edf1	0.0431783	0.98543	0.062293
Cox7b	0.183583	0.991094	0.264855
Mlf2	0.147187	0.994768	0.212345
Sla	-0.439347	0.999195	-0.633843
Dbi	0.120603	1	0.173993
Cmtm3	-0.0781265	1	-0.112713
Gm885	0.191841	1	0.276767
H2-T23	0.0412534	1	0.059516
Slc12a2	0.0505682	1	0.0729545
Clip1	0.212054	1	0.305929
Hint1	0.313109	1	0.45172
Creb3l2	0.320415	1	0.462261
Cebpa	0.0481702	1	0.069495
Son	-0.471589	1	-0.68036
Gm17511	0.151842	1	0.219062
Atp5c1	0.22506	1	0.324693
Plxdc2	0.265832	1	0.383515
Kcnma1	0.295699	1	0.426603
Gaa	0.275071	1	0.396844
ERCC-00108	-0.229119	1	-0.330548
Gm8017	0.216234	1	0.311959
Gm11407	0.30269	1	0.436689
Ncl	0.221013	1	0.318854
Uqcrh	0.338196	1	0.487913
H3f3a	0.048291	1	0.0696692
Fuca1	0.227082	1	0.32761
Tm6sf1	-0.475741	1	-0.686349
Tnfsf8	0.154197	1	0.222459
Treml2	0.251783	1	0.363246
Gm11828	0.142014	1	0.204882
Cfh	-0.0239553	1	-0.0345602
Tcn2	-0.0701485	1	-0.101203
Gm4294	0.176534	1	0.254685
Ttc3	0.375583	1	0.541851
Klf3	-0.480274	1	-0.692888
Ftl1	0.198369	1	0.286187
2010107E04Rik	0.333483	1	0.481114
Pmepa1	-0.29205	1	-0.42134
Prex1	-0.380749	1	-0.549304
Hvcn1	0.128823	1	0.185853
Alox5ap	-0.335835	1	-0.484507
Lrrc58	-0.0025477	1	-0.00367556
Cfl1	0.193216	1	0.278752
Uqcr10	0.285721	1	0.412209
Sfpi1	-0.147606	1	-0.212951
Ppp1r3b	-0.165508	1	-0.238778
Ptpmt1	0.0958641	1	0.138303
Clec4a2	-0.388103	1	-0.559914
St8sia6	0.283901	1	0.409583
D10Wsu52e	0.156575	1	0.22589
Gm9703	0.199777	1	0.288217
Sod1	0.126218	1	0.182094
Rab3il1	-0.348099	1	-0.5022
Gm13196	0.078255	1	0.112898
Ptafr	-0.426847	1	-0.61581
Hmgn3	0.108931	1	0.157154
Cenpb	0.17114	1	0.246903
Ndfip2	-0.288908	1	-0.416806
Ergic3	0.364182	1	0.525404
Ptpn11	0.181407	1	0.261716
Hnrnpd	-0.0859912	1	-0.124059
Ngfrap1	0.153848	1	0.221956
Tecr	0.136296	1	0.196634
Gm6483	-0.268178	1	-0.386899
Ski	-0.221877	1	-0.320101
Gm7336	0.12557	1	0.18116
Gm4987	0.156919	1	0.226386
Mbnl1	-0.256722	1	-0.370371
Clptm1l	0.196098	1	0.282909
Slc6a6	0.044592	1	0.0643326
Gm4997	0.14223	1	0.205195
Atp5e	0.159383	1	0.229941
Slc25a4	0.341947	1	0.493326
Tpm4	0.165018	1	0.238071
Gpnmb	0.497939	1	0.718373
Gpr183	-0.413033	1	-0.595881
Cd37	-0.0663723	1	-0.095755
Arhgef2	-0.307112	1	-0.443069
Gm5921	0.211956	1	0.305788
Romo1	0.201501	1	0.290704
Hs6st1	-0.397471	1	-0.57343
Pfkl	0.173453	1	0.25024
Gm8292	0.12281	1	0.177178
Nop56	0.198186	1	0.285923
Il10ra	-0.318593	1	-0.459633
Itga6	-0.227159	1	-0.327722
Bin1	-0.320859	1	-0.462901
Gm15661	0.105224	1	0.151807
Pcbp1	-0.272139	1	-0.392614
Ifnar2	0.224057	1	0.323245
Rbm5	-0.472833	1	-0.682154
Gm7206	0.119917	1	0.173004
F630111L10Rik	-0.173054	1	-0.249663
Atp2a2	0.0642931	1	0.0927553
2900010M23Rik	0.277203	1	0.39992
Cox7c	0.156089	1	0.225189
Gm13268	0.171288	1	0.247117
Ptplb	0.341478	1	0.492648
Nrip1	-0.488185	1	-0.704302
Mylip	-0.26334	1	-0.379919
Ndufa2	0.318278	1	0.459178
Vcp	0.177208	1	0.255658
Mafb	-0.194306	1	-0.280324
2810474O19Rik	-0.323754	1	-0.467079
Arpc3	0.0370952	1	0.0535171
St3gal6	-0.372041	1	-0.536742
Fis1	0.181969	1	0.262525
Kcnk6	-0.374138	1	-0.539767
Uqcrb	0.245591	1	0.354313
Nucb1	0.101092	1	0.145845
Cebpd	-0.42768	1	-0.617012
Adam9	0.367701	1	0.53048
Nexn	0.221463	1	0.319503
Lgals3	0.201366	1	0.29051
Sft2d2	-0.442228	1	-0.638
Epn1	-0.273201	1	-0.394145
Stab1	-0.424614	1	-0.612589
Coro1b	0.0247362	1	0.0356868
Cct8	-0.075895	1	-0.109493
Myl6	0.235555	1	0.339835
Gpi1	0.0832849	1	0.120155
Abcd2	0.324521	1	0.468185
Lcp2	-0.260019	1	-0.375128
P4ha1	0.0832828	1	0.120152
Gm9808	0.14209	1	0.204992
Lhfpl2	0.161572	1	0.233099
M6pr	-0.023471	1	-0.0338615
Sfr1	-0.50555	1	-0.729355
Plxna4	-0.394217	1	-0.568735
C3ar1	0.291119	1	0.419996
F11r	-0.250445	1	-0.361316
Hspd1	0.238399	1	0.343938
Prmt10	-0.272427	1	-0.393029
Gm14044	0.115132	1	0.166101
Hspa8	0.164762	1	0.237702
Gm5451	0.12938	1	0.186656
Prr5l	0.0912957	1	0.131712
Lag3	0.161649	1	0.23321
Nme2	0.15207	1	0.219391
Brp44	-0.0707973	1	-0.102139
Faim	-0.0946295	1	-0.136522
Nfe2l2	-0.0177339	1	-0.0255847
Gm5453	0.151693	1	0.218846
Vav1	-0.183098	1	-0.264154
Sdc3	0.102637	1	0.148074
Chst2	0.0674231	1	0.097271
Wbp5	0.222556	1	0.32108
Coq2	0.112374	1	0.162122
Uqcrq	0.366857	1	0.529262
Gm8805	0.085038	1	0.122684
Gm12166	-0.220054	1	-0.31747
Asah1	-0.1455	1	-0.209913
Wdr45l	-0.227975	1	-0.328898
Ndufv3	0.178882	1	0.258072
Gm10093	-0.225799	1	-0.32576
Tmem90a	0.098011	1	0.1414
Snx17	-0.378263	1	-0.545718
Irf5	-0.17659	1	-0.254765
Chd9	-0.131763	1	-0.190094
Set	0.0988973	1	0.142679
Gm6136	0.216762	1	0.312722
Tmcc3	-0.0659636	1	-0.0951653
Gpc2	-0.315945	1	-0.455812
Lpar6	-0.361474	1	-0.521497
Tgfbr1	-0.190532	1	-0.27488
Pros1	0.101825	1	0.146903
Eif5a	0.239516	1	0.345549
Gm13092	0.190959	1	0.275495
Eef1d	-0.117982	1	-0.170213
S100a9	-0.231535	1	-0.334035
Casc3	-0.345236	1	-0.49807
Bcl2l13	0.369951	1	0.533727
Abca9	-0.388187	1	-0.560036
Tardbp	-0.289744	1	-0.418013
Erp29	0.123804	1	0.178612
Fam49b	-0.251231	1	-0.36245
Chst7	-0.348671	1	-0.503025
Iars	0.0108868	1	0.0157063
Abca7	0.262154	1	0.378208
Dtnbp1	0.194299	1	0.280315
Asb10	0.0589449	1	0.0850396
Ccng2	-0.435796	1	-0.62872
Arf3	-0.141618	1	-0.204311
Grina	0.104707	1	0.15106
Eif3l	-0.109824	1	-0.158442
1110003E01Rik	0.206856	1	0.29843
Bsg	0.0958743	1	0.138317
Tnfaip8l2	-0.400273	1	-0.577473
Clta	0.0534004	1	0.0770404
Hcls1	-0.159656	1	-0.230334
Stk4	-0.371169	1	-0.535484
Qk	-0.203572	1	-0.293692
Ntpcr	-0.43529	1	-0.62799
Gm15459	0.142648	1	0.205798
Cnbp	-0.169448	1	-0.244462
Slc45a4	0.180192	1	0.259963
Rhog	-0.367639	1	-0.53039
Pnpla7	-0.00130005	1	-0.00187558
Fblim1	0.131458	1	0.189653
Gm3386	0.186543	1	0.269124
Srp14	0.172843	1	0.249359
Klf2	-0.328407	1	-0.473792
Utp3	-0.368862	1	-0.532155
Tcf7l2	-0.385025	1	-0.555473
Gm13827	0.0856277	1	0.123535
Upk1b	-0.431987	1	-0.623225
ERCC-00003	-0.177036	1	-0.255409
Chst12	0.0916317	1	0.132197
Slc2a6	0.166328	1	0.239961
Gm5601	0.132219	1	0.190752
Trf	0.187252	1	0.270148
Spg21	0.192847	1	0.27822
Smap2	-0.269376	1	-0.388628
0610012G03Rik	0.387568	1	0.559143
Tmem147	0.0406599	1	0.0586598
Apool	-0.206765	1	-0.298299
Dbr1	0.223258	1	0.322093
Gm13835	-0.0220685	1	-0.0318381
Nptn	0.168919	1	0.243699
Zfp36l2	-0.258562	1	-0.373026
Use1	0.365424	1	0.527196
Atp5g3	0.039303	1	0.0567022
Gna15	-0.264718	1	-0.381908
Gm13339	0.287936	1	0.415403
Cul4b	0.123835	1	0.178656
Kdm2a	-0.179374	1	-0.258782
Cd86	0.0511816	1	0.0738394
Adcy3	0.109407	1	0.15784
Atxn10	0.164591	1	0.237455
Macf1	-0.0551471	1	-0.0795604
Stag1	-0.134585	1	-0.194165
Prickle4	0.266663	1	0.384713
Cd22	0.11923	1	0.172013
X99384	-0.352467	1	-0.508502
Gm12990	0.13354	1	0.192657
Gnptab	0.299049	1	0.431436
Pogk	0.262365	1	0.378513
Myst3	-0.423577	1	-0.611092
Chsy1	-0.430187	1	-0.620629
Nat8l	0.152884	1	0.220565
0610040J01Rik	-0.357709	1	-0.516065
Coro1c	0.158684	1	0.228933
Tgoln1	0.12904	1	0.186165
Il7r	-0.282272	1	-0.407232
Hnrnpk	-0.0885923	1	-0.127812
Sgk1	0.144457	1	0.208407
Usf2	-0.341322	1	-0.492424
Slc15a4	-0.0981045	1	-0.141535
Atp8a1	-0.062386	1	-0.0900039
Hnrnph3	-0.273359	1	-0.394374
Gm2574	0.0365574	1	0.0527412
Cxcl11	0.0582761	1	0.0840747
Csrp1	0.0629241	1	0.0907803
Mocos	0.053008	1	0.0764743
Psmc2	-0.119226	1	-0.172007
Atp5k	0.1215	1	0.175287
Ube2l3	-0.167065	1	-0.241024
Plekho1	-0.228533	1	-0.329704
Arpc1a	0.298164	1	0.43016
ERCC-00165	-0.291227	1	-0.420151
Gtf2b	-0.215062	1	-0.310269
Pik3r5	-0.360203	1	-0.519663
Tln2	-0.174792	1	-0.252172
Nmt1	-0.12891	1	-0.185978
Hsd17b11	-0.18817	1	-0.271472
Scamp5	-0.432773	1	-0.624359
Adprh	0.0201454	1	0.0290637
Trim47	-0.320785	1	-0.462794
Ctnnb1	0.0879976	1	0.126954
Myeov2	0.230592	1	0.332673
Sc4mol	0.160793	1	0.231976
Tmem170b	-0.388495	1	-0.560479
AW112010	0.326083	1	0.470438
Gm9432	0.13825	1	0.199452
Slc7a8	-0.154341	1	-0.222667
Wbscr22	0.128864	1	0.185911
Mrpl54	0.168543	1	0.243157
Acp2	-0.418874	1	-0.604307
Cox17	0.125654	1	0.181281
Cldn25	-0.336611	1	-0.485627
Pgcp	0.21723	1	0.313396
Gcnt2	0.175001	1	0.252473
Gm13935	0.117195	1	0.169076
Slu7	-0.340014	1	-0.490536
Tifa	-0.31643	1	-0.456512
Galnt7	0.186613	1	0.269225
Plekha1	0.379137	1	0.546979
Git2	-0.344315	1	-0.496742
Mdk	0.0531589	1	0.0766921
Rgs19	-0.388193	1	-0.560045
Plxdc1	0.114276	1	0.164865
Nfkb2	0.0616116	1	0.0888867
SNORD79	0.0806659	1	0.116376
Rin2	-0.128661	1	-0.185618
Fubp1	-0.383665	1	-0.553511
Cuta	0.113564	1	0.163838
P2rx4	0.157838	1	0.227712
Dnase2a	0.281643	1	0.406325
Fcgr2b	-0.154734	1	-0.223233
Serp1	0.300473	1	0.43349
Slc29a3	-0.312556	1	-0.450923
Abhd12	0.144209	1	0.208049
2010106G01Rik	-0.0443993	1	-0.0640546
Gm10071	0.101396	1	0.146284
Ptchd1	0.0953543	1	0.137567
Tpp1	0.11341	1	0.163617
Flcn	-0.144456	1	-0.208405
ERCC-00043	-0.176207	1	-0.254213
Cd48	0.215102	1	0.310327
Plxnb2	-0.00653591	1	-0.00942933
Zfp715	-0.350483	1	-0.50564
Nav3	-0.411866	1	-0.594197
Dusp7	-0.136112	1	-0.196369
Sirt2	0.341053	1	0.492035
Ppp4c	-0.311892	1	-0.449965
Asb2	-0.350964	1	-0.506333
Ubc	-0.143084	1	-0.206426
Kif21b	-0.292664	1	-0.422225
Slc13a3	-0.152375	1	-0.21983
Smarca4	0.0585833	1	0.0845179
Rasgef1b	0.108435	1	0.156438
Galnt2	-0.241344	1	-0.348185
Gm17241	0.123262	1	0.177829
Fam73a	0.0822955	1	0.118727
Prkcsh	-0.12892	1	-0.185992
Pmpcb	-0.125941	1	-0.181695
Gm14681	0.130067	1	0.187647
Vash1	-0.24825	1	-0.358149
Rap1b	-0.266369	1	-0.384289
Tnfrsf11a	-0.430558	1	-0.621164
Eif3f	0.111444	1	0.160779
Plxnc1	0.114197	1	0.164751
Gm12338	0.210743	1	0.304037
Apoc4	0.192921	1	0.278327
Tubb5	-0.243796	1	-0.351723
Tmf1	-0.0618504	1	-0.0892313
Entpd4	0.181832	1	0.262328
Lox	0.0730402	1	0.105375
Atp5h	0.199267	1	0.287481
Lsp1	-0.0676855	1	-0.0976495
Ndufb7	0.295978	1	0.427007
Gm11953	0.0667941	1	0.0963635
4933434E20Rik	0.0336786	1	0.0485879
Rasgrp3	-0.0667501	1	-0.0963001
Clint1	0.252431	1	0.364181
Rab11a	-0.244558	1	-0.352822
Wls	0.0354351	1	0.051122
Shoc2	-0.224823	1	-0.324351
Naa20	0.107426	1	0.154983
Hist1h1e	-0.477327	1	-0.688637
Stoml2	0.0241672	1	0.034866
Cd5	0.126893	1	0.183068
Srpk2	0.0776232	1	0.111987
Adarb1	0.149694	1	0.215963
Leprel2	0.198644	1	0.286583
Eno1	0.0772537	1	0.111453
Golm1	-0.306868	1	-0.442718
1110038B12Rik	0.233998	1	0.337587
Tmsb4x	0.153411	1	0.221325
Tspan31	-0.00258961	1	-0.00373601
Eif4b	0.170248	1	0.245615
Echs1	0.179166	1	0.258482
Ick	-0.216321	1	-0.312085
Nfam1	-0.383916	1	-0.553874
St3gal5	-0.358439	1	-0.517119
Rab39	-0.330934	1	-0.477437
2310014H01Rik	-0.290394	1	-0.418951
Bcap31	0.101467	1	0.146386
Rcsd1	-0.393034	1	-0.567029
Man2c1	0.0225231	1	0.032494
Srgn	0.213694	1	0.308296
Gpr77	-0.241793	1	-0.348834
Cbx1	-0.121716	1	-0.175598
Plcd1	-0.158996	1	-0.229382
Twf2	-0.272844	1	-0.39363
Bcl2a1b	0.294727	1	0.425202
Canx	0.0593254	1	0.0855885
Mical1	0.205736	1	0.296814
AF251705	-0.149774	1	-0.216079
Magt1	-0.381544	1	-0.550452
Afg3l1	-0.253408	1	-0.365591
Zfp36	-0.0951272	1	-0.13724
Gm4902	0.10741	1	0.154959
Mea1	0.132031	1	0.19048
Gm8623	0.122627	1	0.176914
Mtus1	-0.335364	1	-0.483828
Mybbp1a	0.134357	1	0.193837
F9	0.224707	1	0.324184
Gtf2i	-0.279432	1	-0.403136
Tmem205	0.170587	1	0.246104
Psma2	0.131768	1	0.190102
Pxn	-0.367507	1	-0.530201
Gla	0.0856795	1	0.123609
Prelid1	0.318706	1	0.459795
Notch2	-0.339997	1	-0.490513
Rapgef6	-0.450215	1	-0.649522
Syt11	0.156229	1	0.225391
Dpy19l4	0.123738	1	0.178516
Hscb	0.063343	1	0.0913846
Arl6ip1	0.144099	1	0.207891
Eif3a	0.207604	1	0.299509
Fam18b	-0.121292	1	-0.174987
Clptm1	0.232025	1	0.334741
Cap1	0.00218784	1	0.00315638
Gm10123	-0.0490126	1	-0.0707102
Gm6155	0.0894244	1	0.129012
Arl1	-0.329008	1	-0.474659
Nfic	-0.0858514	1	-0.123857
Tnni2	0.264751	1	0.381955
Akirin2	-0.383981	1	-0.553967
Cct7	0.0620271	1	0.0894862
Trim28	-0.0401409	1	-0.057911
Tbc1d14	-0.294063	1	-0.424244
Glt25d1	0.167994	1	0.242364
Fam162a	0.182631	1	0.263481
Ggnbp2	-0.1767	1	-0.254924
Snta1	-0.317047	1	-0.457403
Stat3	-0.211708	1	-0.30543
Stk24	-0.102409	1	-0.147745
Pten	-0.397772	1	-0.573863
Gm14586	0.234987	1	0.339014
Atp13a1	0.0259329	1	0.0374132
Sar1a	0.157318	1	0.226963
Ranbp9	0.230095	1	0.331957
Gapvd1	-0.280943	1	-0.405315
Trim26	-0.323941	1	-0.467348
Zfp444	-0.157321	1	-0.226966
Arrb2	-0.334043	1	-0.481922
Gm10279	0.0866899	1	0.125067
Ptp4a2	0.00349439	1	0.00504133
Cyth4	-0.197036	1	-0.284263
Zswim6	-0.397671	1	-0.573717
St6gal1	0.316851	1	0.457119
Gcnt1	-0.327353	1	-0.472271
Uap1l1	0.147904	1	0.21338
Chd2	-0.366356	1	-0.52854
Nisch	-0.362711	1	-0.523282
Eif4g2	-0.0613789	1	-0.0885511
Tomm20	0.0836808	1	0.120726
Edem1	0.124654	1	0.179837
Gm9858	0.0690295	1	0.0995885
Gm13864	0.0689991	1	0.0995447
Mkln1	-0.293808	1	-0.423876
Rhoa	0.00333623	1	0.00481316
Lrch4	-0.239063	1	-0.344895
Gm6807	0.143142	1	0.206511
Il10rb	-0.1264	1	-0.182357
Gm9385	0.0955384	1	0.137833
Ubash3b	-0.409228	1	-0.590392
Gm11688	0.0687731	1	0.0992186
D4Ertd22e	-0.0468578	1	-0.0676016
Slc16a3	0.121505	1	0.175294
Tspan5	0.24117	1	0.347935
H2-Ab1	0.134501	1	0.194044
Cklf	0.0113874	1	0.0164286
Ddx21	-0.020537	1	-0.0296286
Slc39a7	0.0674628	1	0.0973283
Vat1	0.0497001	1	0.0717021
Ncstn	0.105985	1	0.152904
Gp9	-0.330132	1	-0.476279
1200011I18Rik	-0.285411	1	-0.411762
Vkorc1	0.282018	1	0.406866
Gm17415	0.0814708	1	0.117538
Prpsap2	-0.380684	1	-0.54921
Gm5321	0.0648533	1	0.0935636
Scarb1	0.0965888	1	0.139348
Mlxipl	-0.125194	1	-0.180617
Psmc5	-0.0474323	1	-0.0684304
Tnks2	0.11372	1	0.164064
Zfp36l1	-0.281975	1	-0.406804
Esyt2	-0.201123	1	-0.29016
Slc44a2	0.127802	1	0.184379
Tuba1c	0.178361	1	0.257321
Tmem219	0.112984	1	0.163001
Siglec5	0.320665	1	0.462622
Rbm39	-0.409016	1	-0.590085
Ywhaz	0.0592636	1	0.0854993
Dusp6	-0.266957	1	-0.385137
Flot2	0.0352885	1	0.0509106
ERCC-00092	-0.222689	1	-0.321272
Ttyh3	-0.277166	1	-0.399866
Gbp7	-0.425305	1	-0.613585
B3gnt7	0.168574	1	0.243201
Irgm2	-0.343765	1	-0.495947
Sdhd	0.0738276	1	0.106511
Smad3	-0.323035	1	-0.466041
Atp1a1	0.194605	1	0.280756
Znrf2	0.135411	1	0.195357
Il6st	0.180584	1	0.260527
Eea1	-0.027184	1	-0.0392183
C1qc	-0.117	1	-0.168796
Os9	0.201726	1	0.291028
Pmp22	0.18461	1	0.266336
Cd300lb	0.0794911	1	0.114681
Tmbim4	-0.133618	1	-0.19277
Tsg101	-0.252803	1	-0.364717
Gm5879	-0.0529328	1	-0.0763659
Gm11353	0.0518464	1	0.0747986
Gatad1	0.23035	1	0.332325
Ophn1	-0.409695	1	-0.591065
Gm8566	0.0528278	1	0.0762144
Myd88	-0.342989	1	-0.494828
Tsc22d4	-0.318696	1	-0.459782
Irf8	0.0791614	1	0.114206
Hpgd	-0.198047	1	-0.285722
Grap	-0.376897	1	-0.543747
Zfp467	-0.236472	1	-0.341157
Ppid	-0.179101	1	-0.258388
Dpysl2	0.0686709	1	0.0990712
Mllt10	-0.0422273	1	-0.0609212
Arhgef40	-0.301496	1	-0.434967
Fam193a	-0.081673	1	-0.117829
2310044H10Rik	-0.0218222	1	-0.0314827
BC024479	-0.142579	1	-0.205699
Pwwp2a	-0.334382	1	-0.482411
Irak1	-0.026017	1	-0.0375346
Itgb5	0.118062	1	0.170328
Rtn4rl1	-0.348597	1	-0.502919
Ctss	0.130305	1	0.187991
Bmpr2	-0.182708	1	-0.263592
Gns	0.0851431	1	0.122835
Vps37b	-0.395101	1	-0.57001
Dap	0.122131	1	0.176197
Ankrd13a	0.184178	1	0.265713
Tcp1	0.227969	1	0.32889
Morf4l2	0.0415934	1	0.0600065
Gm6415	0.158144	1	0.228153
Mapkapk2	0.263363	1	0.379953
Ddx31	0.198899	1	0.286951
Stk11	-0.324581	1	-0.468272
Ehmt1	-0.0809394	1	-0.116771
Ap1s2	-0.241729	1	-0.348742
Mdh1	0.106716	1	0.153959
Gm16288	0.0736938	1	0.106318
Mast3	-0.242349	1	-0.349636
Cdk4	0.0440753	1	0.0635872
Rnaseh2b	0.0370561	1	0.0534607
Coro1a	-0.276083	1	-0.398303
Ptplad2	-0.26557	1	-0.383137
Etnk1	-0.352492	1	-0.508538
Nhlrc1	0.118286	1	0.170651
Hpcal1	0.215022	1	0.310211
Prdx2	0.120499	1	0.173843
Adam17	-0.16146	1	-0.232937
Agap1	0.179284	1	0.258652
Mfsd1	-0.018336	1	-0.0264533
Eif4a2	-0.0933798	1	-0.134719
Il18bp	0.0766057	1	0.110519
Cdk2ap2	0.0802389	1	0.11576
Abl1	-0.328586	1	-0.474049
Asap1	0.198371	1	0.286188
Manf	0.227887	1	0.328772
Crk	-0.109586	1	-0.158099
Ppp1ca	0.182336	1	0.263055
Bcl2l1	0.190469	1	0.274789
Prkar1a	0.309653	1	0.446734
Evi2b	0.19772	1	0.28525
Pttg1ip	-0.19434	1	-0.280374
Gm12254	0.271185	1	0.391237
Tecpr1	-0.109432	1	-0.157877
Ly9	0.0862188	1	0.124387
Btg2	-0.326628	1	-0.471224
Plod3	0.00437838	1	0.00631667
Synj2bp	0.052048	1	0.0750893
Aprt	0.273627	1	0.39476
Srsf7	-0.00814311	1	-0.011748
Rplp0-ps1	0.06623	1	0.0955496
Prkca	-0.249816	1	-0.360409
Ndufb8	0.117684	1	0.169782
Ipo5	0.229313	1	0.330829
Cd300a	-0.0718731	1	-0.103691
Icam1	-0.296343	1	-0.427533
Aig1	0.271465	1	0.391642
Eif1ax	0.196143	1	0.282975
Xpo6	0.111378	1	0.160685
Anxa4	-0.0436049	1	-0.0629086
Ier5	-0.304794	1	-0.439725
Dnajc14	0.0172501	1	0.0248867
Gm14173	0.0496111	1	0.0715737
Fundc2	0.298933	1	0.431269
Crip1	0.256771	1	0.370443
Cox6c	0.403699	1	0.582414
Adora3	-0.307315	1	-0.443362
Klf13	0.0280421	1	0.0404562
ERCC-00116	-0.266725	1	-0.384803
Wtip	0.148647	1	0.214452
Tnfsf12	-0.0785429	1	-0.113314
Arpc4	-0.266368	1	-0.384287
Sri	0.226835	1	0.327254
Gnptg	0.182488	1	0.263274
Nup188	0.213224	1	0.307617
Tmem59	0.0215644	1	0.0311109
Sh3glb1	-0.0642621	1	-0.0927106
Tbca	0.0661402	1	0.0954202
Nenf	0.245581	1	0.354298
B4galnt1	0.0676695	1	0.0976264
BC035044	-0.325636	1	-0.469794
N4bp1	-0.280275	1	-0.404352
Otub1	0.126447	1	0.182425
Cyfip1	-0.00243364	1	-0.003511
Snx29	-0.139285	1	-0.200946
Efcab4a	-0.0933355	1	-0.134655
2610005L07Rik	-0.212221	1	-0.30617
Rnf181	-0.0887538	1	-0.128045
Rnf7	-0.0206566	1	-0.0298011
Zfp91	-0.337171	1	-0.486435
H2afz	0.161955	1	0.233652
Ppa1	0.278189	1	0.401343
Mfap3	-0.116358	1	-0.167869
Aimp1	0.0723047	1	0.104314
Orai2	-0.223857	1	-0.322957
Mmgt2	-0.0451692	1	-0.0651654
Ybx1	0.169777	1	0.244936
Zbtb20	-0.38698	1	-0.558294
Ssr2	0.156471	1	0.22574
Fcgr1	-0.31184	1	-0.44989
Rnf19b	-0.227273	1	-0.327886
Elmo1	-0.280028	1	-0.403995
Evl	-0.262136	1	-0.378182
Dbnl	-0.33446	1	-0.482524
Sema4b	-0.182311	1	-0.263019
Tlr13	-0.212252	1	-0.306216
Mtpn	-0.0606574	1	-0.0875101
Gm12346	0.135257	1	0.195134
Gm13493	0.0565873	1	0.0816383
Eif4h	-0.0342414	1	-0.0493999
Reep3	0.0471784	1	0.068064
6230427J02Rik	-0.215337	1	-0.310666
Anp32b-ps1	0.0921653	1	0.132966
Psme1	0.115262	1	0.166288
Cbfa2t3	-0.320713	1	-0.462692
Ncf2	0.0495115	1	0.07143
Ap2s1	0.0124915	1	0.0180215
Arf1	0.106463	1	0.153593
Gm6457	0.0840317	1	0.121232
Bst2	0.103717	1	0.149632
Mtdh	-0.134616	1	-0.19421
Sf1	-0.042723	1	-0.0616362
Pigyl	0.193855	1	0.279674
Eng	-0.373939	1	-0.53948
Guf1	-0.145324	1	-0.209658
Abi1	-0.185791	1	-0.268039
Sgpl1	0.207279	1	0.299041
Copb1	0.0442098	1	0.0637812
Ube2j1	-0.0654317	1	-0.0943979
Mrgpre	0.295732	1	0.426651
Hcst	0.152113	1	0.219452
Pigs	0.152659	1	0.220241
Dnajc25	0.167484	1	0.241628
Ptpn18	0.0364028	1	0.0525181
Jam3	-0.275791	1	-0.397882
Uba7	-0.265947	1	-0.383681
Asxl2	-0.260258	1	-0.375473
Tagap	-0.298005	1	-0.429931
D15Ertd621e	-0.323483	1	-0.466687
Nnt	-0.0027562	1	-0.00397635
Pycard	-0.190808	1	-0.275277
Txndc9	-0.261496	1	-0.377259
Pilra	0.173673	1	0.250557
Sypl	-0.137669	1	-0.198615
St6galnac4	-0.171405	1	-0.247285
Pmpca	-0.0830648	1	-0.119837
Ptger4	0.159576	1	0.23022
Acer3	-0.0437834	1	-0.0631661
Sft2d1	-0.196555	1	-0.283568
Tmbim6	-0.0435655	1	-0.0628517
Idh2	-0.297799	1	-0.429633
Mrps21	0.0554441	1	0.079989
Mrpl33	0.269559	1	0.388891
Tgfbr2	0.235184	1	0.339299
0910001L09Rik	0.161658	1	0.233223
B3gnt1	-0.154435	1	-0.222802
Aurkaip1	0.0510086	1	0.0735899
Arhgdib	-0.0182168	1	-0.0262813
Atp6v1d	0.104487	1	0.150743
Cd82	-0.317706	1	-0.458352
Cln3	0.00717554	1	0.0103521
Ttc28	-0.342955	1	-0.494779
Myh10	0.106527	1	0.153686
Tmem175	-0.180407	1	-0.260272
Golga4	0.155069	1	0.223717
Itprip	0.0383397	1	0.0553125
Gm14166	0.120608	1	0.174001
Rfxank	-0.110856	1	-0.159932
Mex3c	0.0824447	1	0.118943
Spsb1	-0.306018	1	-0.44149
Gm16379	0.0890027	1	0.128404
Fkbp4	0.0241535	1	0.0348462
Mrpl52	0.116195	1	0.167634
Hsp90aa1	0.0843081	1	0.121631
Dusp3	0.216009	1	0.311635
Nup205	0.124751	1	0.179978
Gm6969	0.0590178	1	0.0851448
Cyp51	0.201061	1	0.29007
Gm15032	0.0669471	1	0.0965843
Rab11b	-0.0269678	1	-0.0389063
2510009E07Rik	-0.0421654	1	-0.0608317
Herpud1	-0.200219	1	-0.288854
Mgat4a	-0.321121	1	-0.46328
Gm7670	0.0748597	1	0.108
Cpeb2	0.0975491	1	0.140734
Tmem30a	-0.151202	1	-0.218138
Adipor1	0.257895	1	0.372064
Leprotl1	0.0818658	1	0.118107
Ak3	-0.117281	1	-0.169201
Psmb6	0.129256	1	0.186476
Fez2	-0.348364	1	-0.502583
Dkc1	0.101372	1	0.146248
Gm8724	0.142802	1	0.20602
Retnlg	-0.103815	1	-0.149774
Ppp2ca	-0.269818	1	-0.389266
Calm1	0.14688	1	0.211903
Tlr7	-0.268918	1	-0.387967
Mdfic	0.104539	1	0.150818
Arhgap30	-0.358086	1	-0.516609
Pfkfb3	0.0573928	1	0.0828002
Ostc	0.019061	1	0.0274992
Dido1	-0.329825	1	-0.475837
2020-09-02	0.0617286	1	0.0890556
Wipf1	0.0941191	1	0.135785
Tmem63a	-0.256713	1	-0.370358
Ncor1	-0.227771	1	-0.328604
Rtn4	-0.0211273	1	-0.0304802
Gpbp1	-0.160477	1	-0.23152
Cep68	-0.370369	1	-0.534329
Ptpn1	-0.294969	1	-0.42555
Gm12471	0.157553	1	0.2273
Alas1	0.0634471	1	0.0915347
Lpcat1	0.0179327	1	0.0258714
Smek1	-0.235685	1	-0.340022
2900073G15Rik	0.0642407	1	0.0926798
Psmb2	-0.0258223	1	-0.0372537
Spata13	-0.235864	1	-0.34028
Trub2	-0.118635	1	-0.171154
Wrn	-0.149108	1	-0.215117
Gm6356	-0.0899337	1	-0.129747
Bri3bp	0.217839	1	0.314275
Zfand2a	-0.000653097	1	-0.000942219
Tmem180	0.203808	1	0.294032
Ddx47	-0.185029	1	-0.26694
Dopey2	-0.266805	1	-0.384919
ERCC-00163	-0.308135	1	-0.444545
Zfp385a	-0.193146	1	-0.27865
Gpr146	-0.261522	1	-0.377297
Lemd2	-0.275328	1	-0.397214
Pdia3	0.0452347	1	0.0652599
Ppp1r10	-0.273852	1	-0.395085
S100a8	-0.19453	1	-0.280648
Gm12481	0.175718	1	0.253507
Gm14000	0.00770747	1	0.0111195
Mknk2	-0.245586	1	-0.354306
Cnpy2	0.0336634	1	0.0485661
Mgat1	-0.316765	1	-0.456995
Zfp384	-0.00439864	1	-0.0063459
Tab2	-0.339741	1	-0.490142
Zyg11b	-0.05617	1	-0.0810362
Gm11539	0.0980565	1	0.141466
Pid1	-0.250346	1	-0.361172
P2ry6	-0.209899	1	-0.302821
Picalm	-0.173225	1	-0.249911
Prkacb	-0.195348	1	-0.281827
Tmem100	-0.318524	1	-0.459532
Cd2ap	-0.293366	1	-0.423238
Ppp2r1b	-0.259536	1	-0.374432
Atp6v0b	-0.0205211	1	-0.0296057
Flii	-0.10891	1	-0.157124
Tsc22d3	-0.288288	1	-0.415912
Vps25	-0.013342	1	-0.0192484
Kdelr2	0.00820017	1	0.0118303
Fam174a	0.0337452	1	0.048684
Rwdd1	0.00347238	1	0.00500958
Jak1	-0.296901	1	-0.428338
Tppp	-0.256877	1	-0.370596
Abcf1	0.0619712	1	0.0894056
Gm7589	0.0948935	1	0.136902
Aldh9a1	0.104396	1	0.150612
Apobec1	0.0507763	1	0.0732547
Myo1f	0.115737	1	0.166974
Anapc4	0.0344319	1	0.0496747
Gpr155	-0.286951	1	-0.413982
Ubap2l	0.0105052	1	0.0151559
Polr3e	0.144482	1	0.208443
Mrpl43	-0.284526	1	-0.410484
H47	-0.0180479	1	-0.0260376
Pafah1b1	-0.206692	1	-0.298194
Xpot	-0.0793346	1	-0.114456
Snrpg	0.0614892	1	0.0887102
Fkbp15	-0.335444	1	-0.483943
Arhgap4	-0.31103	1	-0.448721
Gm3362	0.115143	1	0.166117
Ube2k	0.0557942	1	0.080494
Sub1	-0.042677	1	-0.0615699
Sap30	0.0715072	1	0.103163
Dvl1	-0.091848	1	-0.132509
Tbk1	-0.284587	1	-0.410573
Chst10	0.0396607	1	0.0572182
Commd8	-0.323607	1	-0.466866
Arhgef10l	-0.202311	1	-0.291872
Fermt3	-0.236317	1	-0.340934
Cope	0.0992107	1	0.143131
Txndc5	-0.0358634	1	-0.05174
Gm10263	0.0530921	1	0.0765957
Poldip3	-0.327041	1	-0.47182
Igsf10	0.0779374	1	0.11244
Gm7749	0.0252299	1	0.036399
Ctse	0.121752	1	0.17565
Gm13216	0.0166467	1	0.0240161
Fxyd6	0.158069	1	0.228045
Gm17682	0.103126	1	0.148779
Cdo1	0.220536	1	0.318166
Ecm1	0.0323656	1	0.0466937
Fcer2a	0.128335	1	0.185148
Rp2h	-0.114553	1	-0.165266
Tmed7	-0.0207902	1	-0.0299939
Atp6v1e1	-0.100052	1	-0.144345
Zc3h15	0.0633456	1	0.0913883
Ptp4a3	-0.263647	1	-0.380362
Arid1a	-0.271308	1	-0.391415
Ss18	-0.334008	1	-0.481872
Cp	0.156768	1	0.226169
Cpt1a	0.249264	1	0.359612
Havcr2	-0.186182	1	-0.268604
Gm6368	0.0297136	1	0.0428677
Nup214	0.0869549	1	0.125449
Cd47	-0.261842	1	-0.377757
Ptprc	0.211154	1	0.304631
Dynll1	-0.0400579	1	-0.0577914
Plod1	-0.317754	1	-0.458422
Lama3	0.248443	1	0.358428
Lass6	0.315588	1	0.455297
Asph	0.0824329	1	0.118925
Abhd13	-0.0779054	1	-0.112394
Taok1	-0.375973	1	-0.542415
Etv5	-0.317312	1	-0.457784
Hnrnph1	-0.306943	1	-0.442825
Cpsf6	-0.123089	1	-0.177579
Hat1	0.151766	1	0.218952
Gart	-0.137348	1	-0.198151
Nfu1	-0.152939	1	-0.220644
Sertad2	-0.236918	1	-0.341801
Lactb2	-0.124302	1	-0.17933
Itpripl2	0.0988902	1	0.142668
Lbr	-0.25162	1	-0.36301
Slc16a1	0.165926	1	0.239381
Diap2	-0.100842	1	-0.145484
Hdlbp	0.180788	1	0.260822
Rbm8a	-0.20192	1	-0.291309
Pskh1	-0.166603	1	-0.240357
Dnmt3a	0.0458585	1	0.0661598
Gm16118	-0.0850855	1	-0.122752
2010007H12Rik	-0.0910132	1	-0.131304
Chn2	0.126401	1	0.182358
Srebf1	0.172926	1	0.24948
Fam134b	-0.0243502	1	-0.0351299
Sidt2	-0.0133247	1	-0.0192234
Prdx6	0.117167	1	0.169037
Mef2c	-0.0173126	1	-0.0249769
Ddb1	0.269198	1	0.38837
Gm12739	0.0548282	1	0.0791004
Csnk1g3	0.167745	1	0.242005
Nucks1	0.133441	1	0.192515
Cdc5l	-0.226298	1	-0.326479
9030625A04Rik	-0.0798621	1	-0.115217
Snd1	0.0514411	1	0.0742138
Gas5	0.0677629	1	0.0977612
Rcbtb2	0.0308915	1	0.044567
Rnf167	-0.260872	1	-0.376359
Abcc5	-0.283544	1	-0.409068
Pecam1	-0.353876	1	-0.510536
Actr1a	-0.103062	1	-0.148688
Eif4a1	0.0548071	1	0.07907
Hps3	-0.352071	1	-0.507931
Klhdc2	-0.060887	1	-0.0878414
Gm13889	0.146408	1	0.211222
Rnf139	-0.264749	1	-0.381952
Ssfa2	0.071052	1	0.102506
Rac2	-0.342316	1	-0.493858
Sertad1	0.0819384	1	0.118212
Atp6v0a1	0.0284608	1	0.0410603
Slc35e1	-0.0513793	1	-0.0741247
Dennd5a	0.0616794	1	0.0889845
Coro2a	0.18028	1	0.260089
Eps15	-0.144477	1	-0.208436
Dhx9	-0.096167	1	-0.13874
Acox3	-0.131349	1	-0.189497
Glrx3	-0.00292914	1	-0.00422585
Apc	-0.308488	1	-0.445054
Bmyc	-0.133268	1	-0.192265
Rab35	-0.172745	1	-0.249218
Renbp	0.146992	1	0.212065
Rpn1	0.0244116	1	0.0352185
Ell2	0.191312	1	0.276005
Atp2c1	0.0480201	1	0.0692784
Klf12	-0.260092	1	-0.375234
Plcg2	-0.299452	1	-0.432018
Pde2a	-0.188344	1	-0.271723
D19Bwg1357e	0.177264	1	0.255738
Ccdc72	0.113305	1	0.163464
Pag1	-0.286801	1	-0.413766
RP24-327G7.3	0.0446664	1	0.06444
Atp6ap2	0.28249	1	0.407547
B4galt1	-0.227221	1	-0.327811
Fndc3a	-0.108922	1	-0.157141
Fam129b	0.207889	1	0.299921
Cd180	0.11817	1	0.170483
Sec11c	-0.0861384	1	-0.124271
Eif1	0.0199425	1	0.028771
Pin4	0.059555	1	0.0859198
Pa2g4	-0.193736	1	-0.279502
Nsa2	0.0597832	1	0.0862489
Exoc5	-0.0942104	1	-0.135917
Vdac2	0.029674	1	0.0428106
Ampd3	-0.0954337	1	-0.137682
Rgl3	-0.109581	1	-0.158092
Mycl1	-0.101823	1	-0.1469
Qrsl1	-0.131243	1	-0.189344
Sgta	-0.214082	1	-0.308855
Sike1	0.0841619	1	0.12142
Ergic1	-0.114847	1	-0.165689
Ddx39b	-0.130066	1	-0.187645
Dld	0.252244	1	0.363911
Lrrc8d	-0.0514666	1	-0.0742506
Vps26b	0.0736442	1	0.106246
Scarb2	0.108525	1	0.156569
Hcfc1r1	0.0404398	1	0.0583423
Arf4	-0.189559	1	-0.273476
Gm12715	0.0539419	1	0.0778217
Ddx17	-0.222853	1	-0.321509
Sepn1	0.205371	1	0.296288
Txn1	0.0756671	1	0.109165
Eif3i	0.181484	1	0.261826
Snrpf	0.118933	1	0.171583
Ifi27l1	0.0500906	1	0.0722654
Stat1	-0.160279	1	-0.231234
4732418C07Rik	0.123487	1	0.178155
Eif3m	-0.127963	1	-0.184611
Tmed5	-0.222739	1	-0.321344
Tex2	0.128235	1	0.185003
Mta2	-0.2497	1	-0.36024
Gtf2e2	-0.0578054	1	-0.0833956
Tprgl	-0.153629	1	-0.22164
Agmo	-0.274943	1	-0.39666
Sh3bp2	0.158682	1	0.22893
2900064A13Rik	0.137527	1	0.198409
Hlx	0.0406567	1	0.0586552
Mthfs	0.129755	1	0.187197
Tmem123	0.136799	1	0.197359
Tm2d2	-0.0362809	1	-0.0523423
Dirc2	-0.312978	1	-0.451531
Ppp2r1a	-0.102335	1	-0.147638
2810021B07Rik	-0.153524	1	-0.221489
Eef2k	-0.285558	1	-0.411972
Filip1l	-0.305815	1	-0.441198
Vegfb	0.215767	1	0.311286
Basp1	-0.0552869	1	-0.0797622
Gm10250	0.11912	1	0.171853
Bcl6	0.190984	1	0.275531
Tmx4	-0.279309	1	-0.402958
Gm16580	0.174244	1	0.251381
Ifngr2	0.0821742	1	0.118552
Wars	0.264592	1	0.381725
Arhgap22	-0.239467	1	-0.345478
Gm13680	0.0874816	1	0.126209
Stt3a	0.172227	1	0.248471
Rgs1	0.184509	1	0.26619
Lrch3	0.0400848	1	0.0578301
Tmem189	0.131266	1	0.189376
Hadha	-0.162448	1	-0.234363
Slc37a2	0.156137	1	0.225258
Fkbp9	-0.0102003	1	-0.014716
Kdelr1	-0.210926	1	-0.304301
Clec4a3	-0.275867	1	-0.397992
Numb	-0.298591	1	-0.430775
Rbbp7	0.0999965	1	0.144264
Bloc1s1	0.301165	1	0.43449
Gm4342	0.0663787	1	0.0957642
Hist1h2bc	0.10576	1	0.15258
Nsd1	-0.0422698	1	-0.0609824
Lasp1	-0.141295	1	-0.203846
Bach1	-0.326454	1	-0.470974
Gm9025	-0.0626646	1	-0.090406
Atp6v1a	0.171309	1	0.247147
Gnb4	-0.253868	1	-0.366253
Zfp748	-0.200911	1	-0.289853
Snx6	-0.27824	1	-0.401416
Slc16a6	-0.277783	1	-0.400756
Gm17383	-0.0781567	1	-0.112756
Slc38a7	-0.0183186	1	-0.0264281
Daglb	-0.165	1	-0.238045
Ltn1	-0.303877	1	-0.438402
Ndufb9	0.3702	1	0.534086
Elf4	-0.165726	1	-0.239093
Ptk2b	-0.0139956	1	-0.0201914
Bax	0.100532	1	0.145037
Irf2	-0.327132	1	-0.471951
Ran	0.0414837	1	0.0598483
Ktn1	0.00715725	1	0.0103257
Rnf4	-0.0868527	1	-0.125302
Il17ra	-0.334166	1	-0.4821
Sykb	-0.26265	1	-0.378924
Tmem111	-0.225087	1	-0.324731
Htra3	0.101363	1	0.146236
Gm3788	0.125531	1	0.181103
Gde1	0.111004	1	0.160146
Nuak1	-0.338938	1	-0.488985
Rmi1	0.0614486	1	0.0886517
Ethe1	0.0707544	1	0.102077
Dock8	-0.26331	1	-0.379875
Rac1	-0.0725432	1	-0.104658
2610029G23Rik	0.203922	1	0.294198
Igsf8	0.0401195	1	0.0578802
Lpgat1	-0.271323	1	-0.391437
Psmd13	0.250812	1	0.361845
Heatr1	-0.192635	1	-0.277913
Nolc1	0.125418	1	0.180939
1600002K03Rik	0.109911	1	0.158568
Hdac1	-0.220162	1	-0.317626
Zcchc11	-0.260628	1	-0.376006
Uggt1	0.160802	1	0.231988
Phax	-0.32013	1	-0.46185
Sqrdl	-0.305466	1	-0.440694
Plcb2	-0.142024	1	-0.204897
Icmt	0.11578	1	0.167036
Adrbk1	-0.291143	1	-0.420031
Tsc22d1	0.161966	1	0.233667
Cxxc5	-0.244081	1	-0.352134
Gm12251	0.0231875	1	0.0334525
Tmem206	0.0759354	1	0.109552
Qars	0.0891708	1	0.128646
Dnajc3	-0.00264687	1	-0.00381863
Gm9153	0.105038	1	0.151538
Iah1	0.0967299	1	0.139552
Relb	0.180824	1	0.260873
Brcc3	-0.00665739	1	-0.00960459
Eprs	0.326675	1	0.471292
Napsa	-0.0805572	1	-0.116219
Nup107	-0.08406	1	-0.121273
Kcnmb4	-0.061675	1	-0.0889782
2310004N24Rik	0.203723	1	0.29391
AI607873	0.0669675	1	0.0966136
St8sia4	0.208508	1	0.300814
Uckl1	-0.0947894	1	-0.136752
Serf2	0.201423	1	0.290592
Sec61b	0.275653	1	0.397683
Gpcpd1	-0.191025	1	-0.275591
Atp13a2	0.0721114	1	0.104035
Chst8	-0.264221	1	-0.38119
Mtch2	0.0913769	1	0.131829
Atp6v1g1	0.0428122	1	0.061765
Smg7	-0.213911	1	-0.308608
Dgkd	-0.00222612	1	-0.00321161
Ndufs3	-0.0492279	1	-0.0710209
Mat2b	-0.318403	1	-0.459358
Bnip3l	-0.108628	1	-0.156718
Eif2ak3	0.266993	1	0.385189
Nrp2	0.040663	1	0.0586643
Rnf13	-0.0374054	1	-0.0539645
Cxxc1	-0.16727	1	-0.241319
Rel	-0.269347	1	-0.388585
Fyn	0.0665537	1	0.0960167
Nsf	0.0426852	1	0.0615817
Nufip2	-0.270204	1	-0.389823
Sult1a1	-0.37959	1	-0.547632
Nap1l1	0.216219	1	0.311938
Gm13253	-0.0161584	1	-0.0233116
Dnajb1	-0.345495	1	-0.498444
Ube2a	-0.225279	1	-0.325009
Gmfg	-0.264359	1	-0.381389
Gm6542	0.0546059	1	0.0787796
Smc2	0.0931314	1	0.13436
Tnrc6b	-0.242512	1	-0.34987
Gyg	0.223523	1	0.322476
Ythdf2	-0.248983	1	-0.359207
Txndc15	-0.264937	1	-0.382223
Lrpprc	-0.176131	1	-0.254103
Ndufs5	0.0688374	1	0.0993114
Arpc2	0.0400771	1	0.057819
Mrpl24	0.0293779	1	0.0423833
Kbtbd2	-0.135177	1	-0.195019
Ccdc97	-0.178111	1	-0.25696
Abhd15	-0.251302	1	-0.362552
Ilvbl	-0.0832803	1	-0.120148
Nhsl2	-0.148338	1	-0.214006
Ikzf1	-0.186716	1	-0.269375
Med12l	-0.320108	1	-0.461818
Gm14078	0.0972735	1	0.140336
Stard4	0.0348761	1	0.0503156
Map4k1	0.0847954	1	0.122334
Il27ra	0.0840908	1	0.121317
Ogdh	0.0230747	1	0.0332898
Appbp2	0.105366	1	0.15201
Snx19	0.00905492	1	0.0130635
Gm14541	0.0522309	1	0.0753533
Fam110a	-0.262616	1	-0.378874
Fdps	0.177795	1	0.256505
Gltscr2	0.0870007	1	0.125515
Tspan18	-0.199388	1	-0.287657
Stx4a	-0.307601	1	-0.443775
Pi4ka	0.202686	1	0.292414
C230081A13Rik	-0.104652	1	-0.15098
Hsdl1	-0.241057	1	-0.347771
D6Wsu163e	-0.18668	1	-0.269322
Atp5o	0.144307	1	0.208192
Sfpq	-0.118772	1	-0.171352
Gm7429	0.0423698	1	0.0611268
Bivm	-0.0830062	1	-0.119753
Slc39a12	-0.101605	1	-0.146585
Tecpr2	-0.0888798	1	-0.128226
Sepsecs	-0.116577	1	-0.168186
Arhgap17	-0.0342435	1	-0.0494029
Asna1	-0.07939	1	-0.114536
Gas7	0.138806	1	0.200255
Ywhae	0.0490939	1	0.0708276
Psmb1	0.114449	1	0.165115
Dhx58	0.0900537	1	0.12992
Tpcn1	-0.175403	1	-0.253053
Ang	0.158103	1	0.228094
Ercc4	-0.00559414	1	-0.00807063
Litaf	0.0574538	1	0.0828883
P2rx7	-0.265747	1	-0.383392
Mrpl39	-0.133692	1	-0.192877
Rab11fip2	0.0661714	1	0.0954651
Tob2	-0.268277	1	-0.387042
9130011J15Rik	0.00829998	1	0.0119743
Als2	0.170861	1	0.2465
Txnl1	0.157245	1	0.226857
Gna13	-0.122101	1	-0.176155
Mfng	-0.228073	1	-0.32904
Sssca1	-0.0247415	1	-0.0356945
Kdm6a	-0.319224	1	-0.460543
Cd24a	0.108791	1	0.156952
Fuca2	0.0137725	1	0.0198695
BC013712	-0.300264	1	-0.43319
Actr10	-0.0156881	1	-0.0226332
Ndufa7	0.214696	1	0.309741
Amdhd2	0.217459	1	0.313727
Sgsh	-0.220898	1	-0.318689
Jrk	0.127874	1	0.184483
Alg1	-0.121375	1	-0.175107
Clcn3	0.137137	1	0.197847
Pcdhgc5	0.0948109	1	0.136783
Npepps	-0.0620178	1	-0.0894728
Tm2d1	-0.0590408	1	-0.0851778
Lmf2	0.101953	1	0.147086
Snx2	-0.211271	1	-0.3048
ERCC-00022	-0.164461	1	-0.237267
Ostf1	-0.241866	1	-0.348938
Med1	-0.206376	1	-0.297738
Chd4	0.0244926	1	0.0353354
Gm10196	0.0388071	1	0.0559868
Ifi44	0.0835452	1	0.12053
AC132082.1	0.0697044	1	0.100562
Trafd1	-0.290216	1	-0.418693
Ehbp1l1	-0.140707	1	-0.202997
Cc2d1a	0.0684974	1	0.0988209
Cwc25	0.0886669	1	0.127919
Tubgcp5	-0.283692	1	-0.409281
Zfp740	-0.267434	1	-0.385825
Mknk1	-0.267933	1	-0.386545
Irf2bp1	-0.179865	1	-0.259491
Kif3c	0.0756155	1	0.10909
Sfxn3	0.00770807	1	0.0111204
Jak2	0.0146327	1	0.0211105
Stard3	-0.33906	1	-0.48916
4632419I22Rik	-0.0770689	1	-0.111187
Hbp1	-0.164299	1	-0.237033
Zfp292	-0.173206	1	-0.249884
Phf15	-0.00938991	1	-0.0135468
ERCC-00095	-0.264785	1	-0.382004
Tbcc	-0.163443	1	-0.235798
Neurl1a	-0.181226	1	-0.261454
Zfp81	-0.210853	1	-0.304196
Dag1	0.1969	1	0.284067
Gfer	-0.167927	1	-0.242268
Zeb2	-0.247384	1	-0.356899
Mid1ip1	-0.116289	1	-0.167769
Krcc1	-0.232985	1	-0.336126
Rpsa-ps11	0.0698636	1	0.100792
Lman2	0.0405872	1	0.058555
Hck	-0.226123	1	-0.326226
Abhd4	0.210623	1	0.303865
Npnt	0.291739	1	0.42089
Gm8995	0.101494	1	0.146425
Kbtbd8	0.0343813	1	0.0496018
Cxcl14	0.0741779	1	0.107016
BC016423	-0.205232	1	-0.296087
Vps53	0.0671394	1	0.0968616
Trmt2b	0.134759	1	0.194416
Ubb	0.0801017	1	0.115562
Bambi	0.0486463	1	0.0701818
Cdk13	-0.12473	1	-0.179947
Nagpa	0.145612	1	0.210074
6720456B07Rik	0.0891526	1	0.12862
Gm6905	0.11378	1	0.16415
Vps35	-0.181455	1	-0.261784
Npat	-0.232342	1	-0.335199
Abcf2	0.055773	1	0.0804634
Csk	-0.238708	1	-0.344383
Phlda1	0.110612	1	0.159579
Vamp3	-0.119224	1	-0.172004
C1rl	-0.189496	1	-0.273385
Psap	0.108391	1	0.156376
Trmu	-0.0824361	1	-0.11893
Slc12a7	-0.0756411	1	-0.109127
Nubpl	-0.085619	1	-0.123522
Atp5j	0.192652	1	0.277939
Tmem135	-0.227665	1	-0.328451
Krt17	0.0677561	1	0.0977514
Gm9892	-0.00805175	1	-0.0116162
Srpk1	0.01626	1	0.0234582
Arsb	-0.0184024	1	-0.0265491
Jhdm1d	-0.200794	1	-0.289684
Eepd1	0.0106597	1	0.0153786
Wdr26	-0.172982	1	-0.249561
Mlec	0.0390541	1	0.0563431
Zyx	-0.240291	1	-0.346667
Cxcl13	0.351634	1	0.5073
Gm11196	0.0842926	1	0.121608
Rnf130	-0.225349	1	-0.32511
Srebf2	0.0373372	1	0.0538662
Rp9	-0.264989	1	-0.382298
Bag1	0.363062	1	0.523788
Slc50a1	-0.135486	1	-0.195465
2700029M09Rik	0.146002	1	0.210636
Gm12760	0.0578994	1	0.0835312
Tex261	0.0862281	1	0.124401
Epb4.1l2	-0.205389	1	-0.296314
Ggt5	-0.236666	1	-0.341436
Mob1a	-0.118068	1	-0.170336
Ankrd44	-0.237718	1	-0.342955
Zfp710	-0.28904	1	-0.416996
Gm5277	0.135411	1	0.195356
Cenpa	0.119622	1	0.172578
Nagk	0.249709	1	0.360254
Nfix	-0.255384	1	-0.368441
Gm9774	0.0405818	1	0.0585472
Egr2	0.0718422	1	0.103646
Cnot3	-0.198897	1	-0.286948
Tmem204	-0.249922	1	-0.360561
C230096C10Rik	0.114465	1	0.165138
2610036A22Rik	0.00309189	1	0.00446065
Klrb1b	0.0919263	1	0.132622
ERCC-00060	-0.213193	1	-0.307572
Cryl1	-0.167244	1	-0.241283
Fyb	-0.00629584	1	-0.00908297
Impact	0.00739342	1	0.0106664
Ankhd1	-0.138994	1	-0.200526
Got2	0.0647367	1	0.0933953
Mboat7	0.223968	1	0.323118
Lap3	-0.278295	1	-0.401495
G3bp2	-0.101945	1	-0.147075
Srsf5	-0.288372	1	-0.416033
Luc7l	0.05349	1	0.0771698
Rela	-0.146904	1	-0.211937
Klhl7	0.0962543	1	0.138866
Gm12396	-0.0257271	1	-0.0371164
Gm4950	0.0113808	1	0.0164191
Tmem29	0.0739944	1	0.106751
Hnrnpab	0.0895867	1	0.129246
Znrf1	-0.186691	1	-0.269338
Ttyh2	0.13525	1	0.195125
Csnk2b	0.102379	1	0.147701
Dpcd	0.280634	1	0.404869
Ndufb10	0.111037	1	0.160193
Eif3g	-0.0774568	1	-0.111747
Baz2b	-0.290481	1	-0.419076
Nfatc3	-0.226206	1	-0.326346
Gm5908	0.0531237	1	0.0766413
Gse1	-0.113441	1	-0.163661
Vps18	-0.0494108	1	-0.0712848
Fam175b	-0.261589	1	-0.377394
Tmed2	0.0737551	1	0.106406
A430084P05Rik	0.12847	1	0.185343
Amz1	-0.00189568	1	-0.00273488
Wdr48	-0.217224	1	-0.313388
Rabac1	0.145257	1	0.209562
Gnb1	-0.0900217	1	-0.129874
Gm13573	0.0191451	1	0.0276205
Rap1gds1	-0.25765	1	-0.37171
Sh3tc1	-0.194618	1	-0.280774
Ifi30	-0.271027	1	-0.391009
Prrc2b	0.0716704	1	0.103398
Mrps9	-0.0371402	1	-0.0535819
Fkbp1a	0.127195	1	0.183504
Capns1	0.0085037	1	0.0122682
Mcmbp	-0.173821	1	-0.250771
H1f0	-0.101157	1	-0.145938
Ubl7	-0.0614031	1	-0.088586
Stxbp4	-0.103042	1	-0.148658
Gm11221	-0.0607322	1	-0.0876181
Tef	-0.28759	1	-0.414905
Neu1	0.0152792	1	0.0220432
Rnaset2b	0.0628169	1	0.0906256
B3galtl	-0.278475	1	-0.401754
Irak2	-0.0595615	1	-0.0859291
Cyb5r1	0.037391	1	0.0539438
Gtf3c4	0.168121	1	0.242547
Htt	-0.162321	1	-0.23418
Tmc6	-0.0520601	1	-0.0751068
Aco2	0.0795582	1	0.114778
Slc25a45	-0.250524	1	-0.36143
Slc35a5	0.122623	1	0.176908
Gdi1	-0.25431	1	-0.366892
Cops4	0.0839537	1	0.12112
H2-Q7	0.0388295	1	0.0560191
Gm5428	0.0950066	1	0.137066
Rbbp6	-0.346643	1	-0.500099
Cpne3	-0.0698242	1	-0.100735
Dab2	0.0272245	1	0.0392766
Manbal	-0.0238627	1	-0.0344266
Suclg2	0.190695	1	0.275115
Ppcdc	-0.326489	1	-0.471024
Rabep2	-0.0893111	1	-0.128849
Ddx24	-0.101852	1	-0.146941
Csnk2a1	-0.180607	1	-0.26056
S100a1	0.058226	1	0.0840024
Sppl3	-0.161551	1	-0.233069
Snx3	0.146223	1	0.210955
Gm11836	0.166439	1	0.240121
8430406I07Rik	-0.166781	1	-0.240614
Gm10020	0.0491144	1	0.0708571
Rnf149	0.131559	1	0.189799
Setd7	0.0812387	1	0.117203
Fmn1	0.35446	1	0.511378
Agpat6	0.00308553	1	0.00445147
Cd53	-0.0507988	1	-0.0732871
C130050O18Rik	0.100015	1	0.144292
Zswim7	0.0901359	1	0.130039
Gm12328	0.00455515	1	0.00657169
Fgf13	0.173684	1	0.250573
Gm11603	0.118395	1	0.170808
Smpdl3a	0.232004	1	0.334712
Gm7618	0.0723584	1	0.104391
Ccdc22	-0.0392042	1	-0.0565597
Ube2g2	-0.274818	1	-0.396479
Myadm	-0.286919	1	-0.413937
Ggh	0.124644	1	0.179823
Clk3	-0.204134	1	-0.294503
Nes	0.168563	1	0.243185
Serpine1	0.0310282	1	0.0447643
Gm8526	0.0969872	1	0.139923
Rab7	-0.0106594	1	-0.0153782
Rnf138	-0.151548	1	-0.218638
Tcf20	0.228856	1	0.33017
Dennd4a	-0.341952	1	-0.493333
Slc44a1	0.214213	1	0.309044
Otud1	0.143903	1	0.207608
Sfxn1	0.0410194	1	0.0591784
2810006K23Rik	-0.288849	1	-0.416721
Kcnk12	-0.268207	1	-0.386941
Stxbp2	0.191592	1	0.276408
Slc38a1	0.245744	1	0.354533
Fgd3	-0.238512	1	-0.344101
H2-Ob	0.203915	1	0.294187
Gm3355	0.0768644	1	0.110892
AI467606	-0.0328299	1	-0.0473636
Pip5k1a	-0.202813	1	-0.292597
Samsn1	0.106623	1	0.153825
Yipf5	-0.158727	1	-0.228995
Twistnb	-0.0868843	1	-0.125348
Chek2	0.163441	1	0.235795
Man1a	-0.252412	1	-0.364153
2410006H16Rik	0.147424	1	0.212689
Gm10126	0.147583	1	0.212917
C1qbp	0.199244	1	0.287448
Pccb	0.0224038	1	0.0323218
Peli1	-0.219744	1	-0.317023
Gm6476	0.115027	1	0.165949
Pi4k2a	-0.287754	1	-0.415142
Topbp1	0.249196	1	0.359513
2510006D16Rik	0.0342062	1	0.0493491
Hspbap1	-0.0756835	1	-0.109188
BC088983	-0.0668947	1	-0.0965087
Gm4951	-0.0926042	1	-0.1336
Zfp455	-0.102307	1	-0.147598
E430018J23Rik	-0.0899082	1	-0.12971
Tcf25	-0.0168949	1	-0.0243742
Rnf5	0.068082	1	0.0982216
Clock	-0.16359	1	-0.23601
Cbx5	0.0322295	1	0.0464974
Zfand6	-0.265691	1	-0.383311
Drap1	-0.0669614	1	-0.0966049
Vipar	-0.0806617	1	-0.11637
Pkig	-0.269338	1	-0.388573
Tpst2	-0.230194	1	-0.3321
Polr1d	-0.148872	1	-0.214777
Slc1a3	-0.201539	1	-0.290759
Psmg4	0.0923661	1	0.133256
Acp5	0.0950029	1	0.13706
Tmsb10	0.0845068	1	0.121918
1810029B16Rik	0.0311257	1	0.0449049
Abca2	0.0827786	1	0.119424
Pgd	0.329166	1	0.474886
5S-rRNA	-0.124179	1	-0.179153
Id2	0.214892	1	0.310023
1110018J18Rik	-0.055578	1	-0.0801821
Tgif1	0.16389	1	0.236443
Brd7	-0.28572	1	-0.412207
Ndufb11	0.139417	1	0.201137
Atf6	0.106661	1	0.153879
Atp6v1b2	0.0599753	1	0.0865261
Smad4	-0.113807	1	-0.164189
Limd2	0.017183	1	0.0247898
Cwc15	-0.136127	1	-0.196389
1700012B15Rik	0.0962762	1	0.138897
Tcfe3	-0.264673	1	-0.381842
Tax1bp1	-0.0245096	1	-0.0353599
Elp2	-0.0990183	1	-0.142853
Galnt10	-0.144661	1	-0.208702
Snrpc	0.0873626	1	0.126038
Inpp4b	-0.263667	1	-0.38039
Efhd2	0.100558	1	0.145074
Bcap29	0.0121991	1	0.0175995
Ppp1r7	-0.184201	1	-0.265745
Rasgrf2	-0.28196	1	-0.406783
1110002B05Rik	-0.0033765	1	-0.00487126
BC031781	-0.275543	1	-0.397524
Lsmd1	0.240679	1	0.347227
1810006K21Rik	-0.00776343	1	-0.0112003
Tomm22	0.0516753	1	0.0745517
Pgls	0.00139895	1	0.00201826
Mbd3	0.0724103	1	0.104466
Lfng	-0.168375	1	-0.242914
Nol11	-0.144549	1	-0.20854
Abca3	-0.0668712	1	-0.0964748
Wdr33	0.0373639	1	0.0539048
Chchd1	-0.16259	1	-0.234568
Pja2	-0.17372	1	-0.250626
Ly6e	-0.0118401	1	-0.0170816
Slc7a5	0.0229848	1	0.0331601
Gm14323	0.097937	1	0.141293
Vdac1	-0.0566111	1	-0.0816726
Psmd11	-0.10813	1	-0.155998
Tspan3	-0.0328015	1	-0.0473226
Agpat5	0.0457583	1	0.0660152
Atrx	0.073234	1	0.105654
Galk1	0.149167	1	0.215202
Tpst1	-0.0742582	1	-0.107132
Ccdc55	-0.235161	1	-0.339266
Samm50	-0.139236	1	-0.200875
Aftph	-0.236419	1	-0.34108
Mbnl2	-0.275767	1	-0.397847
Adi1	-0.0514837	1	-0.0742753
Ppp1r8	-0.176058	1	-0.253998
Mrfap1	0.0982377	1	0.141727
Arap1	-0.0406139	1	-0.0585935
Ddit4	-0.0967503	1	-0.139581
Pknox1	-0.243397	1	-0.351147
Taf12	0.00290717	1	0.00419416
Abca1	-0.233773	1	-0.337264
0610007P22Rik	0.145312	1	0.209641
Pcbp2	0.0700402	1	0.101047
Cln5	0.115382	1	0.166461
Psmc6	-0.098787	1	-0.14252
Zc3hav1	0.151476	1	0.218534
Arl4c	-0.0183627	1	-0.0264917
Camk1	-0.0990864	1	-0.142951
Atad1	-0.146244	1	-0.210985
Parp9	0.216803	1	0.31278
Nipa2	-0.161963	1	-0.233663
Pkib	0.150591	1	0.217256
Ermap	-0.0710057	1	-0.10244
Tctn3	-0.0835474	1	-0.120533
Zfp438	-0.0826466	1	-0.119234
Zfp869	-0.0782133	1	-0.112838
Fkbp2	0.113188	1	0.163296
Hltf	-0.289414	1	-0.417536
Gnai2	-0.125498	1	-0.181055
[truncated: 9,487 more rows]

## Sheet: INTERACTOME GENE
Gene symbol
ALDOA
APOE
ARHGAP5
ATF3
ATP6V1C1
AXL
CALM2
CCL3
CCL4
CCR5
CD63
CD9
CKB
CLEC7A
CLIC4
CMTM6
COMT
COX8A
CSF1
CSF1R
CST7
CSTB
CTSA
CTSB
CTSD
DPP7
EEF1A1
EEF1B2
EEF1G
EEF2
FGR
FTH1
GLB1
GNAS
GNG5
HIF1A
HSP90AB1
IGF1
INPP5D
IVNS1ABP
LDHA
LGALS3BP
LYN
MARCKS
MERTK
NDUFA1
NDUFA6
NPM1
P2RY12
PABPC1
PGK1
PLAUR
PLD3
PPT1
PRDX4
PSAT1
RGS2
RPLP0
RPLP1
RPLP2
RPSA
SLC25A3
SLC2A5
SPP1
SSR4
TIMP2
TPI1
TPT1
ZBTB7A

## Sheet: INTERACTOME PPI
Protein A	Protein B
CCR5	CCL3
CCL3	CCL4
CCR5	CCL4
CD9	CD63
CD63	CLEC7A
HSP90AB1	CLIC4
CSF1	CSF1R
CTSB	CST7
TPT1	CST7
CTSD	CTSA
GLB1	CTSA
PLAUR	CTSA
APOE	CTSB
CSTB	CTSB
CSTB	CTSD
CTSB	CTSD
CSTB	DPP7
EEF1A1	EEF1B2
EEF1A1	EEF1G
EEF1B2	EEF1G
CKB	EEF2
EEF1A1	EEF2
GNAS	GNG5
ALDOA	HSP90AB1
ATF3	HSP90AB1
AXL	HSP90AB1
CSF1R	HSP90AB1
EEF2	HSP90AB1
FGR	HSP90AB1
HIF1A	HSP90AB1
CTSB	IGF1
CSF1R	INPP5D
FGR	INPP5D
ATP6V1C1	IVNS1ABP
HSP90AB1	IVNS1ABP
HIF1A	LDHA
HSP90AB1	LDHA
CD9	LGALS3BP
HSP90AB1	LGALS3BP
CSF1R	LYN
HSP90AB1	LYN
INPP5D	LYN
CALM2	MARCKS
CTSB	MARCKS
HSP90AB1	MERTK
NDUFA1	NDUFA6
ARHGAP5	NPM1
COX8A	NPM1
EEF1A1	NPM1
EEF1B2	NPM1
EEF1G	NPM1
EEF2	NPM1
FGR	NPM1
HSP90AB1	NPM1
RPSA	NPM1
CMTM6	P2RY12
EEF1A1	PABPC1
EEF2	PABPC1
RPSA	PABPC1
ALDOA	PGK1
HIF1A	PGK1
HSP90AB1	PGK1
EEF1A1	PLAUR
GLB1	PLAUR
LYN	PLAUR
SPP1	PLD3
CTSD	PPT1
NPM1	PRDX4
HSP90AB1	PSAT1
TIMP2	PSAT1
COMT	RGS2
CTSB	RGS2
GNAS	RGS2
HSP90AB1	RPLP0
NPM1	RPLP0
RPSA	RPLP0
EEF1A1	RPLP1
NPM1	RPLP1
RPLP0	RPLP1
RPSA	RPLP1
RPLP0	RPLP2
RPLP1	RPLP2
RPSA	RPLP2
EEF1A1	RPSA
HSP90AB1	RPSA
NPM1	SLC25A3
RPSA	SLC2A5
EEF1A1	SPP1
FTH1	SPP1
MARCKS	SPP1
RPSA	SSR4
PGK1	TPI1
EEF1A1	TPT1
EEF1B2	TPT1
RPLP1	TPT1
SPP1	TPT1
EEF1A1	ZBTB7A

## Sheet: PATHWAY ENRICHMENT
The pathway enrichment analysis is based on genes from disease network (INTERACOME GENE)
Pathway Term	# Overlapped genes	Adjusted P-value	Overlap Genes
Lysosome	6	0.000709718	CTSA;CD63;GLB1;PPT1;CTSD;CTSB
HIF-1 signaling pathway	5	0.00241209	LDHA;PGK1;IGF1;ALDOA;HIF1A
Chemokine signaling pathway	6	0.00327085	FGR;LYN;GNG5;CCL4;CCL3;CCR5
Glycolysis / Gluconeogenesis	4	0.00341847	LDHA;TPI1;PGK1;ALDOA
Human cytomegalovirus infection	6	0.00803601	GNG5;CCL4;CCL3;GNAS;CCR5;CALM2
Alzheimer disease	5	0.00934767	COX8A;NDUFA6;NDUFA1;APOE;CALM2
Rap1 signaling pathway	5	0.0157045	CSF1R;CSF1;GNAS;IGF1;CALM2
Kaposi sarcoma-associated herpesvirus infection	5	0.0157045	LYN;GNG5;CCR5;HIF1A;CALM2
Estrogen signaling pathway	4	0.0157045	HSP90AB1;GNAS;CTSD;CALM2
Oxidative phosphorylation	4	0.0157045	COX8A;NDUFA6;NDUFA1;ATP6V1C1
Dopaminergic synapse	4	0.0157045	GNG5;GNAS;COMT;CALM2
Long-term depression	3	0.0157045	LYN;GNAS;IGF1
Ras signaling pathway	5	0.0157045	CSF1R;CSF1;GNG5;IGF1;CALM2
PI3K-Akt signaling pathway	6	0.0167078	CSF1R;HSP90AB1;CSF1;GNG5;SPP1;IGF1
Oxytocin signaling pathway	4	0.0214039	RGS2;GNAS;EEF2;CALM2
Renin secretion	3	0.0231326	GNAS;CALM2;CTSB
Pathways in cancer	7	0.0231326	CSF1R;HSP90AB1;GNG5;GNAS;IGF1;HIF1A;CALM2
Ribosome	4	0.0255127	RPLP1;RPLP0;RPLP2;RPSA
Rheumatoid arthritis	3	0.0261246	CSF1;CCL3;ATP6V1C1
Cytokine-cytokine receptor interaction	5	0.0261246	CSF1R;CSF1;CCL4;CCL3;CCR5
Fc gamma R-mediated phagocytosis	3	0.0261246	LYN;MARCKS;INPP5D
Hematopoietic cell lineage	3	0.0309999	CSF1R;CSF1;CD9
Toll-like receptor signaling pathway	3	0.0328466	CCL4;CCL3;SPP1
Circadian entrainment	3	0.0328466	GNG5;GNAS;CALM2
Glucagon signaling pathway	3	0.0331862	LDHA;GNAS;CALM2
Proteoglycans in cancer	4	0.0331862	CD63;PLAUR;IGF1;HIF1A
Fructose and mannose metabolism	2	0.03891	TPI1;ALDOA
Thermogenesis	4	0.0482678	COX8A;NDUFA6;NDUFA1;GNAS

## Sheet: DISEASE GENE
Gene symbol (AD-assocated genes)
CSF1R
CSF1
COMT
HIF1A
PLD3
RGS2
LDHA
INPP5D
TIMP2
CCL3
APOE
CKB
CCR5
CTSD
CTSB
COX8A
TPI1
NDUFA6
PLAUR
RPSA
IGF1
EEF2
MARCKS
GLB1
PPT1
CALM2
TPT1

## Sheet: GPSnet parameters
	top 0.0010	top 0.0020	top 0.0030	top 0.0040	top 0.0045	top 0.0048	top 0.0050
0	5	5	5	11	61	68	69
0.1	4	4	4	4	17	18	18
0.2	4	4	4	4	4	16	16
0.3	4	4	4	4	4	4	4
0.4	4	4	4	4	4	4	4
0.5	4	4	4	4	4	4	4
0.6	4	4	4	4	4	3	3
0.7	4	4	4	4	3	3	3
0.8	4	4	4	4	3	0	0
0.9	4	4	4	4	0	0	0
