# Supplementary material for: Multimodal single-cell/nucleus RNA sequencing data analysis uncovers molecular networks between disease-associated microglia and astrocytes with implications for drug repurposing in Alzheimer's disease
Source: HighWire-hosted journal article supplement (doi:10.1101/gr.272484.120), 2021-02-24
Supplement: Supplemental_Table_S7.zip [file Supplemental_Table_S7.xlsx]

## Sheet: DESCRIPTION
Supplemental Table S7. Disease molecular network results for a mouse snRNA-seq dataset (GSE143758).
PATHWAY ENRICHMENT	Enrichr/Pathways/KEGG 2019 Mouse (FDR < 0.05)
DISEASE GENE	Enrichr/Diseases or Drugs/DisGeNET (Alzheimer's Disease, FDR < 0.05)

## Sheet: DEG
mouse gene symbol	avg_logFC	p_val_adj	avg_log2FC
Gfap	0.886719	5e-131	1.27926
Vim	1.17534	1.9e-90	1.69566
Plce1	0.949302	5.88e-80	1.36955
Sbno2	0.936741	2.54e-79	1.35143
Gsn	0.916099	6.17e-75	1.32165
Igfbp5	0.669712	1.02e-73	0.96619
Sorbs1	0.631219	1.45e-61	0.910656
Osmr	0.823949	4.58e-61	1.18871
Fxyd1	0.891457	3.86e-60	1.2861
Sgcd	0.664339	3.19e-57	0.958439
Enox1	0.632813	2.11e-55	0.912956
Cnn3	0.735776	5.22e-55	1.0615
C4b	0.60883	8.83e-54	0.878356
Ncam2	0.534282	1.52e-52	0.770805
Serping1	0.695009	9.66e-52	1.00269
Chl1	0.628784	1.04e-50	0.907144
Fos	0.651903	1.09e-49	0.940498
Sparc	0.477727	3.3e-47	0.689214
Mlc1	0.575331	3.7e-47	0.830027
Glis3	0.597941	9.85e-47	0.862647
Slc39a14	0.513833	1.39e-46	0.741305
Usp53	0.61963	1.46e-46	0.893938
Shroom3	0.596634	5.43e-46	0.860761
Sulf1	0.412847	8.37e-45	0.595613
Syt1	-0.560365	8.27e-44	-0.808436
Abca1	0.536199	2.16e-43	0.773571
Csmd1	0.42837	2.98e-43	0.618007
Ctsb	0.761308	3.95e-43	1.09834
Cd9	0.726497	4.57e-43	1.04811
Dst	0.431534	7.96e-43	0.622571
Cyr61	0.705351	8.03e-43	1.01761
S1pr3	0.406651	8.54e-43	0.586674
Grin2b	-0.591899	3.41e-42	-0.85393
Gria1	-0.572474	7.58e-42	-0.825905
Opcml	-0.638851	1.25e-41	-0.921667
Myoc	-1.04417	2.31e-41	-1.50642
Matn4	0.55721	2.8e-41	0.803885
Add3	0.503011	5.52e-41	0.725692
Prdx6	0.523895	6.9e-41	0.755821
Dlg2	-0.530527	9.1e-41	-0.765388
Aqp4	0.224245	1.26e-40	0.323517
Ppp3ca	-0.138945	2.68e-40	-0.200455
Anxa2	0.397864	3.38e-40	0.573997
Clu	0.735381	1.37e-39	1.06093
Hsd17b4	0.483447	2.09e-39	0.697466
Slc1a3	0.621473	2.1e-39	0.896596
Tspan3	0.419651	2.69e-39	0.605429
Dhrs1	0.590906	2.84e-39	0.852497
Cebpb	0.515953	3.5e-39	0.744363
Rbfox1	-0.462046	5.62e-39	-0.666592
Lrrc7	-0.454134	5.89e-39	-0.655177
Angpt1	0.426576	1.09e-38	0.615419
Cst3	0.559126	1.09e-38	0.806648
Pdpn	0.438861	2e-38	0.633142
Fam19a1	-0.506146	2.12e-38	-0.730214
Slc1a5	0.343749	2.24e-38	0.495924
Rgl1	0.34727	2.75e-38	0.501005
Meis2	0.36871	6.21e-38	0.531936
Thbs4	0.652379	6.88e-38	0.941184
Hrsp12	0.453537	7.32e-38	0.654315
Dcc	-0.480401	7.87e-38	-0.693073
Ank3	-0.422501	8.97e-38	-0.60954
Scg3	0.417651	1.17e-37	0.602542
Tmem176b	0.343355	1.25e-37	0.495357
Lingo2	-0.482564	1.78e-37	-0.696192
Pde10a	0.440908	1.8e-37	0.636096
Aebp1	0.441408	1.99e-37	0.636817
Lrrtm4	-0.592071	2.6e-37	-0.854178
Tmem47	0.310764	2.61e-37	0.448338
Nckap5	0.368357	3.5e-37	0.531427
Ntrk2	0.424151	3.73e-37	0.61192
S100b	0.321888	4.32e-37	0.464386
Slc35f1	0.420417	4.92e-37	0.606533
Lgals1	0.720325	5.16e-37	1.03921
Frmpd4	-0.412064	7.62e-37	-0.594482
Unc5c	-0.386874	1.01e-36	-0.558141
Tenm2	-0.539733	1.15e-36	-0.77867
Bcl3	0.309825	2.33e-36	0.446983
Lgals3bp	0.403585	2.47e-36	0.582251
Gria2	-0.328916	2.78e-36	-0.474525
Pdzd2	0.333299	3.16e-36	0.480849
Grin2a	-0.414947	5.18e-36	-0.598642
Kctd16	-0.215033	5.97e-36	-0.310226
Slc43a3	0.337995	7.34e-36	0.487624
Lamp2	0.335518	9.26e-36	0.48405
Kcnj3	-0.426015	9.58e-36	-0.61461
Cttnbp2	-0.318382	1.11e-35	-0.459328
Nrg3	-0.585203	1.23e-35	-0.844269
Epha6	-0.424226	2.84e-35	-0.612029
Kcnd2	-0.618623	3.11e-35	-0.892484
Tmbim6	0.283256	3.33e-35	0.408653
Shisa6	0.414875	4.27e-35	0.598539
Arhgap6	0.433491	4.34e-35	0.625395
Kalrn	-0.463337	7.12e-35	-0.668454
Gstm1	0.470996	7.45e-35	0.679503
S100a6	0.606858	1.13e-34	0.875512
Dkk3	0.303695	1.2e-34	0.438139
Kif1a	0.17841	1.21e-34	0.257391
Tnfrsf1a	0.41261	1.85e-34	0.59527
Gpc5	-0.450164	1.96e-34	-0.649449
Itm2c	0.397144	2.06e-34	0.572957
Sema6d	0.455383	2.18e-34	0.656978
Erbb2ip	0.340888	2.46e-34	0.491797
Dock10	-0.283213	2.57e-34	-0.40859
Ptprd	-0.505275	2.57e-34	-0.728958
Prune2	0.294696	3.31e-34	0.425156
Bcl2	0.247428	3.46e-34	0.356963
Ddr1	0.332228	3.52e-34	0.479304
Cav2	0.341685	3.71e-34	0.492948
Junb	0.447556	3.93e-34	0.645686
Plcb1	-0.345996	3.95e-34	-0.499167
Nfe2l2	0.368793	4.07e-34	0.532056
Cdh9	-0.302113	4.17e-34	-0.435858
Dpysl3	0.348251	5.84e-34	0.50242
Dscam	-0.285065	6.96e-34	-0.411261
Chst2	0.330573	8.09e-34	0.476916
Fstl1	0.392083	8.22e-34	0.565657
Rgs17	0.277924	8.99e-34	0.40096
Rims1	-0.282314	9.16e-34	-0.407293
Mgst1	0.382881	9.32e-34	0.552381
Grm5	0.248021	9.87e-34	0.357819
Tmem108	-0.297444	1.3e-33	-0.429122
Pde4b	-0.0382337	1.31e-33	-0.0551595
Ryr3	-0.310624	1.4e-33	-0.448136
Ube2e2	0.260274	1.53e-33	0.375495
Atp1b2	0.482023	1.69e-33	0.695413
Snap25	-0.365261	1.77e-33	-0.52696
Erc2	-0.336311	2.02e-33	-0.485195
Slit3	-0.267908	2.35e-33	-0.386509
Dgkb	-0.399049	2.42e-33	-0.575706
Ryr2	-0.294346	2.62e-33	-0.424651
Srebf1	0.467634	3.36e-33	0.674653
Kctd1	0.415919	3.43e-33	0.600044
Cd109	0.22512	3.68e-33	0.32478
Rfx4	0.207871	3.95e-33	0.299895
Kcnma1	-0.34394	4.11e-33	-0.4962
Igfbp7	0.28415	4.17e-33	0.409941
Cntn5	-0.356797	5.36e-33	-0.514749
Aff1	0.406839	5.63e-33	0.586944
Ahnak	0.314273	6.01e-33	0.4534
C3	0.395439	6.67e-33	0.570497
Tmem176a	0.479235	7.11e-33	0.69139
Abcd3	0.109925	8e-33	0.158589
Slc3a2	0.332564	8.17e-33	0.479789
Fgfr1	0.304393	9.17e-33	0.439147
Mgat5	0.176197	1.05e-32	0.254199
Dtx3	-0.151188	1.22e-32	-0.218118
Nrgn	-0.18739	1.29e-32	-0.270347
Matk	-0.33617	1.34e-32	-0.484991
Ptx3	0.102509	1.34e-32	0.147889
Ssfa2	0.392142	1.45e-32	0.565741
Stat3	0.416926	1.47e-32	0.601497
Phkb	0.226583	1.53e-32	0.326889
Prkd1	0.0481985	1.81e-32	0.0695357
Cd151	0.309869	1.96e-32	0.447046
Ahnak2	0.154279	2e-32	0.222578
Syt11	0.222417	2.34e-32	0.32088
Sntg1	-0.319515	2.36e-32	-0.460963
Gdpd2	0.581835	2.62e-32	0.83941
Gfra1	0.298052	2.63e-32	0.429998
Cd44	0.368158	2.7e-32	0.53114
Tubb2b	0.439315	2.93e-32	0.633798
Hivep2	0.252556	2.95e-32	0.364361
Efr3b	0.192463	2.99e-32	0.277665
Sptbn1	0.0795803	3.08e-32	0.11481
Csmd3	-0.236486	3.25e-32	-0.341177
Ldhb	0.148604	3.31e-32	0.21439
Grm7	-0.260191	3.45e-32	-0.375377
Fas	0.209372	3.48e-32	0.30206
Prickle2	0.136628	3.83e-32	0.197112
Glp2r	-0.193055	3.99e-32	-0.27852
Vcam1	0.38546	4.06e-32	0.556102
Stox2	0.204643	4.47e-32	0.295238
Camk2d	0.242041	4.69e-32	0.349192
Cybrd1	0.259929	4.87e-32	0.374999
Etv6	0.24088	5.28e-32	0.347516
Net1	0.285591	7.1e-32	0.41202
Arhgef4	0.30685	7.6e-32	0.442691
Mid1	0.316299	7.98e-32	0.456322
Gpx4	0.122311	8.07e-32	0.176458
Icam1	0.247372	8.34e-32	0.356883
Dlgap2	-0.235215	8.68e-32	-0.339343
Rgs20	0.305578	9e-32	0.440856
Thy1	-0.10491	9.21e-32	-0.151354
Socs3	0.183305	9.76e-32	0.264454
Slc1a4	0.217977	9.85e-32	0.314474
Rcn2	0.186813	9.99e-32	0.269514
Col16a1	0.31012	1.21e-31	0.447409
Nrxn2	0.0364334	1.25e-31	0.0525623
Slc22a4	0.257693	1.3e-31	0.371773
Robo2	-0.323777	1.32e-31	-0.467112
Atxn7l3b	0.04323	1.4e-31	0.0623677
Adarb2	-0.180801	1.49e-31	-0.26084
Timp1	0.120882	1.5e-31	0.174396
Tnrc6c	-0.124616	1.5e-31	-0.179783
Cntnap2	-0.370639	1.52e-31	-0.534719
Stk40	0.239767	1.54e-31	0.345911
Naaladl2	0.297361	1.7e-31	0.429002
Mid1ip1	0.111461	1.79e-31	0.160804
Grin3a	-0.439097	2.02e-31	-0.633483
Pros1	0.24165	2.29e-31	0.348628
P4ha3	0.274199	2.37e-31	0.395586
Rhbdf1	0.347213	2.62e-31	0.500922
Sik2	0.274747	2.67e-31	0.396376
Nnat	-0.422184	2.78e-31	-0.609083
Cd63	0.406668	2.9e-31	0.586697
Adora2b	0.275135	3.09e-31	0.396935
Gabrb3	-0.300421	3.13e-31	-0.433416
Ctnnbip1	0.124426	3.22e-31	0.179508
Nav3	-0.353221	3.46e-31	-0.50959
Prickle1	-0.376106	3.46e-31	-0.542607
Lamp1	0.336737	3.53e-31	0.485809
Cox6a1	0.165589	3.59e-31	0.238895
Kcnq3	-0.271531	3.65e-31	-0.391736
Dgki	-0.086374	3.67e-31	-0.124611
Map4	-0.0930844	3.72e-31	-0.134292
Ppfia2	-0.197097	3.74e-31	-0.284351
Atp11a	0.252478	4.03e-31	0.364248
Mobp	0.0743069	4.36e-31	0.107202
Chn1	-0.263097	4.46e-31	-0.379569
H2afj	-0.0532668	4.9e-31	-0.0768478
Kcnb2	-0.212342	4.97e-31	-0.306345
Tmed2	0.0852326	5.5e-31	0.122965
Map1b	-0.172466	5.64e-31	-0.248816
Fxyd7	0.497097	6.38e-31	0.71716
Rsrc2	-0.00163821	6.44e-31	-0.00236344
Dbndd2	0.365785	6.45e-31	0.527717
Ifitm3	0.302372	6.73e-31	0.43623
Capza2	0.11344	7.43e-31	0.16366
Pdlim4	0.389374	7.66e-31	0.561748
Pdzrn3	0.340813	7.67e-31	0.491689
Spcs1	0.0456242	7.68e-31	0.0658218
Syf2	0.259942	7.78e-31	0.375017
Fgf14	-0.256381	8.35e-31	-0.36988
Gem	0.342875	8.69e-31	0.494664
Nlrc5	0.151002	8.76e-31	0.21785
Fam189a1	-0.175972	9.4e-31	-0.253874
Ly6h	-0.253644	9.41e-31	-0.36593
Lgi1	-0.377599	1.01e-30	-0.54476
Ahcyl2	-0.159732	1.09e-30	-0.230445
Tom1l2	0.049775	1.13e-30	0.0718101
Sdf4	0.216735	1.2e-30	0.312683
Elovl7	0.154853	1.23e-30	0.223406
Scmh1	0.01308	1.27e-30	0.0188705
Grm1	-0.233645	1.3e-30	-0.337079
Cela1	0.164625	1.35e-30	0.237504
Zeb2	-0.133966	1.4e-30	-0.193272
Gna13	0.185149	1.41e-30	0.267113
Grik2	-0.0888954	1.41e-30	-0.128249
Rtn1	-0.118126	1.54e-30	-0.17042
Nbeal1	0.140506	1.73e-30	0.202707
Slc4a4	-0.0102959	1.79e-30	-0.0148538
Zswim6	0.37289	1.84e-30	0.537966
Prkg1	-0.169946	1.96e-30	-0.245181
Hsp90b1	0.174428	2.05e-30	0.251646
Ube3a	-0.0643515	2.08e-30	-0.0928396
Usp24	0.2597	2.08e-30	0.374668
Klc1	0.0408633	2.1e-30	0.0589533
Sh3d21	0.223617	2.32e-30	0.322611
Tro	0.247824	2.33e-30	0.357534
Aplp1	-0.114937	2.38e-30	-0.16582
Zfand5	0.23308	2.61e-30	0.336263
Cntn4	-0.178084	2.74e-30	-0.256921
Laptm4a	0.218003	2.75e-30	0.314512
Adamtsl4	0.151247	2.82e-30	0.218203
Camta1	0.161615	2.84e-30	0.233161
Grin1	-0.262713	2.93e-30	-0.379015
Pak7	-0.152783	2.94e-30	-0.22042
Zcchc16	-0.190084	3.02e-30	-0.274233
Crebbp	-0.0305785	3.1e-30	-0.0441155
Ifi27	0.269259	3.26e-30	0.388459
Slc24a2	-0.293311	3.26e-30	-0.423158
Mtdh	0.106955	3.37e-30	0.154303
Cldnd1	0.183438	3.43e-30	0.264645
Afap1l2	0.230837	3.44e-30	0.333027
Atp2a2	0.116905	3.44e-30	0.168658
Cnih2	-0.116749	3.45e-30	-0.168433
Sox9	0.348798	3.48e-30	0.503209
Myt1l	-0.265149	3.59e-30	-0.382529
Kcnk10	0.191001	3.6e-30	0.275556
Rbpj	0.17951	3.61e-30	0.258978
Cacna1c	-0.257773	3.65e-30	-0.371888
Dpp6	-0.11187	3.69e-30	-0.161394
Kcnip4	0.101176	3.72e-30	0.145966
Gng12	0.259209	3.74e-30	0.37396
Pdlim5	0.180522	3.9e-30	0.260438
Zbtb38	0.193769	3.93e-30	0.279549
Neto2	0.273448	3.98e-30	0.394502
Mast4	-0.34248	4e-30	-0.494094
Adam23	0.157326	4.24e-30	0.226974
Hmgcll1	0.245079	4.24e-30	0.353575
Ptprt	0.0209517	4.3e-30	0.0302269
Cdh8	-0.169763	4.36e-30	-0.244916
Adamtsl3	0.211262	4.85e-30	0.304786
Mbnl2	0.114334	4.87e-30	0.164949
Camk2a	-0.203628	5.05e-30	-0.293773
Hivep3	0.13452	5.2e-30	0.194071
Anks1b	-0.207209	5.42e-30	-0.298939
Nek6	0.229583	5.42e-30	0.331219
Nebl	0.214514	5.44e-30	0.309479
Ezr	0.412241	5.64e-30	0.594738
Arhgap31	0.119933	6.53e-30	0.173027
Rasa2	0.077183	6.58e-30	0.111351
Hdac4	0.222798	6.62e-30	0.321429
Tmco1	0.170805	6.77e-30	0.246419
St6galnac3	-0.215151	6.78e-30	-0.310397
Mblac2	0.162993	6.92e-30	0.235149
Tagln2	0.231795	7.38e-30	0.334409
Itpkb	0.335571	7.42e-30	0.484127
Antxr1	0.229253	7.49e-30	0.330742
Sybu	0.276329	7.66e-30	0.398659
Tecr	-0.177139	8.17e-30	-0.255558
Aff3	0.297514	8.2e-30	0.429221
Pip5k1b	-0.248847	8.3e-30	-0.359011
Tmod3	0.132612	8.34e-30	0.191319
Ndfip2	0.0805584	8.87e-30	0.116221
Tmeff1	0.230897	8.92e-30	0.333114
Crip2	0.0622024	9.05e-30	0.0897391
Mpped2	-0.131179	9.31e-30	-0.189251
Pdia4	0.282275	9.88e-30	0.407237
Tuba1a	0.236936	9.91e-30	0.341827
Degs1	0.121897	1.01e-29	0.17586
Pja2	-0.0224703	1.02e-29	-0.0324178
Xkr4	-0.0917021	1.04e-29	-0.132298
Btbd9	-0.0973691	1.05e-29	-0.140474
Orc5	-0.0153625	1.05e-29	-0.0221635
Ptk2	-0.0282238	1.14e-29	-0.0407183
Csf1	0.199215	1.15e-29	0.287407
Enah	-0.238843	1.15e-29	-0.344577
Hnrnpa2b1	0.10415	1.15e-29	0.150257
Kcnq5	-0.201352	1.19e-29	-0.290489
Myh3	0.324374	1.2e-29	0.467973
Cyc1	0.0224367	1.29e-29	0.0323694
Nfkb1	0.240975	1.34e-29	0.347654
Prdx1	0.33026	1.41e-29	0.476465
Dcun1d4	0.158351	1.44e-29	0.228452
Notch3	0.169317	1.44e-29	0.244272
Mmp16	0.0913384	1.49e-29	0.131773
Plekho1	0.238283	1.5e-29	0.34377
Oaz2	-0.0406908	1.58e-29	-0.0587044
Ptpn12	0.268897	1.62e-29	0.387936
Tpp1	0.274488	1.67e-29	0.396002
Timm13	-0.0272191	1.81e-29	-0.0392689
Endou	0.255294	1.82e-29	0.368311
Pigt	0.0780375	1.82e-29	0.112584
Trim47	0.185344	1.84e-29	0.267395
Ndufb9	0.0378361	1.85e-29	0.054586
Tsc22d4	0.168032	1.85e-29	0.242419
Syt7	-0.243229	1.87e-29	-0.350905
Tnr	-0.152607	1.92e-29	-0.220165
Rab11b	0.129113	1.95e-29	0.186271
Psd3	0.0151175	2e-29	0.02181
Gjb6	0.323328	2.03e-29	0.466463
Pik3ip1	0.146207	2.09e-29	0.210932
Arl6ip1	0.193206	2.14e-29	0.278737
Tspan4	0.168595	2.14e-29	0.243231
Hsd17b12	0.11621	2.16e-29	0.167656
Fam120c	0.169339	2.18e-29	0.244304
Efemp1	0.0642559	2.2e-29	0.0927017
Snca	-0.218116	2.22e-29	-0.314675
Cntn3	-0.119434	2.23e-29	-0.172306
Cyfip1	-0.0986959	2.23e-29	-0.142388
Lrp1	0.197522	2.33e-29	0.284964
Gabbr2	-0.188153	2.35e-29	-0.271447
Iqgap2	-0.100635	2.43e-29	-0.145185
Osbpl1a	0.0666372	2.59e-29	0.0961371
Kif21a	0.153354	2.61e-29	0.221243
S100a16	0.458459	2.62e-29	0.661416
Pik3r1	-0.252358	2.69e-29	-0.364076
Garem	-0.246437	2.7e-29	-0.355534
Alcam	-0.197924	2.71e-29	-0.285544
Glo1	0.140834	2.72e-29	0.20318
Glipr2	0.277658	2.74e-29	0.400575
Acox1	0.0839749	2.75e-29	0.12115
Gabarapl2	-0.192932	2.79e-29	-0.278342
Mcl1	0.194153	2.82e-29	0.280104
Reep5	0.147905	2.86e-29	0.213382
Cchcr1	0.235491	2.95e-29	0.339741
Rpl41	-0.0138924	2.96e-29	-0.0200425
Serpinh1	0.0274552	2.96e-29	0.0396095
Pter	0.186561	3e-29	0.269151
Gpm6b	0.0629954	3.02e-29	0.0908832
Kifc3	0.262414	3.03e-29	0.378583
Actl6b	-0.227428	3.04e-29	-0.328109
Tgm1	0.139486	3.05e-29	0.201236
Kctd13	-0.0293032	3.08e-29	-0.0422755
Rpl22l1	-0.141316	3.14e-29	-0.203876
Adk	0.317121	3.15e-29	0.457509
Hecw2	-0.156082	3.26e-29	-0.225178
Sema6a	0.212272	3.28e-29	0.306244
Rps15	-0.0672321	3.43e-29	-0.0969954
Pex5l	-0.251318	3.49e-29	-0.362575
Cyp7b1	0.093912	3.52e-29	0.135486
Ppp1r9b	0.0628786	3.64e-29	0.0907146
Pink1	-0.0818523	3.71e-29	-0.118088
Immp2l	0.171993	3.75e-29	0.248134
Adck4	0.302723	3.77e-29	0.436737
Ypel3	-0.0418674	3.78e-29	-0.060402
Vsnl1	-0.177199	3.89e-29	-0.255644
Irs1	0.169929	3.97e-29	0.245156
Cox7c	-0.0716474	3.98e-29	-0.103365
Ube2r2	0.144157	4.11e-29	0.207975
Ap1s1	0.0624254	4.15e-29	0.0900608
Fbxo2	-0.0330182	4.25e-29	-0.0476352
Plxna4	-0.12742	4.35e-29	-0.183828
Tmcc1	0.0308514	4.45e-29	0.0445091
Kcnj6	-0.139611	4.54e-29	-0.201415
Dennd3	0.159558	4.56e-29	0.230194
Serpinf2	0.236016	4.65e-29	0.340499
Igfbp2	0.539798	4.66e-29	0.778763
Tjp1	0.23864	4.7e-29	0.344285
Camk2b	-0.316428	4.73e-29	-0.45651
Plscr2	0.14872	4.82e-29	0.214558
Uqcrh	-0.0294014	5.07e-29	-0.0424172
Rpl13a	0.0158248	5.08e-29	0.0228304
Shank1	-0.0512105	5.16e-29	-0.0738811
Fhit	0.086117	5.21e-29	0.124241
Tnrc6b	0.090891	5.22e-29	0.131128
Sema3c	0.140613	5.26e-29	0.202862
Glud1	-0.0779625	5.35e-29	-0.112476
Gldc	0.159866	5.49e-29	0.230638
Eps15l1	-0.0326687	5.52e-29	-0.047131
Bax	0.113704	5.55e-29	0.16404
Cacnb2	0.155513	5.63e-29	0.224358
Rps25	-0.136752	5.66e-29	-0.197292
Nln	0.209883	5.71e-29	0.302797
Pum2	0.0226055	5.76e-29	0.0326129
Ifit3	0.234872	5.84e-29	0.338849
Celf4	-0.185522	5.93e-29	-0.267652
Elovl5	0.017583	6.01e-29	0.0253669
Golgb1	0.0286256	6.02e-29	0.0412981
Uqcr10	0.0159486	6.14e-29	0.0230089
Bst2	0.2108	6.3e-29	0.30412
Cdc42bpa	0.00147347	6.51e-29	0.00212576
Gab2	0.211303	6.71e-29	0.304846
Rbms3	0.20653	6.72e-29	0.29796
Spire1	-0.154097	6.83e-29	-0.222315
Canx	0.0639877	7.16e-29	0.0923147
Echdc2	0.237809	7.16e-29	0.343086
Cadm4	0.258118	7.2e-29	0.372386
Rabep1	0.133341	7.38e-29	0.192371
Rtf1	0.191152	7.41e-29	0.275775
Srgap3	-0.0957183	7.45e-29	-0.138092
Ppm1b	0.0589758	7.54e-29	0.0850841
Rassf8	0.333052	7.57e-29	0.480493
Nr3c2	-0.174169	7.78e-29	-0.251273
Nell2	-0.255587	7.79e-29	-0.368733
Pxdn	0.119311	8.11e-29	0.17213
Ccdc136	0.139895	8.19e-29	0.201825
Agpat3	0.0267133	8.22e-29	0.0385392
Ccnd2	0.0625929	8.28e-29	0.0903025
Spcs2	0.221942	8.41e-29	0.320194
Rtn4	0.0728971	8.57e-29	0.105168
Atp6v0b	-0.046336	8.58e-29	-0.0668488
Ksr2	-0.126739	8.69e-29	-0.182845
Chrm3	-0.244679	8.81e-29	-0.352997
Necap2	0.149943	9.3e-29	0.216322
Rab18	0.107931	9.32e-29	0.155712
Ank2	0.247713	9.34e-29	0.357375
Cdh2	0.202891	9.52e-29	0.29271
Timp2	0.339683	9.7e-29	0.49006
Gadd45g	0.257599	9.8e-29	0.371636
Jakmip1	-0.231146	9.92e-29	-0.333474
Dclk2	-0.0599997	1.02e-28	-0.0865613
Pdia6	0.0758452	1.02e-28	0.109422
Plcd3	0.197597	1.02e-28	0.285073
Asb3	-0.122669	1.04e-28	-0.176974
Cnksr2	-0.168024	1.1e-28	-0.242408
Itga5	0.0973365	1.14e-28	0.140427
Pkia	0.127652	1.14e-28	0.184163
Gpr137	0.0895551	1.18e-28	0.129201
E4f1	-0.228634	1.2e-28	-0.329849
Cacna2d3	0.128751	1.21e-28	0.185749
Plekhb1	0.108637	1.23e-28	0.15673
Smyd3	0.0121754	1.25e-28	0.0175654
Soga3	0.0333752	1.25e-28	0.0481502
Rgs7bp	-0.190654	1.29e-28	-0.275056
Tenm1	-0.171621	1.29e-28	-0.247597
Clstn1	0.0390537	1.3e-28	0.0563426
Clic1	0.224326	1.36e-28	0.323633
Synpo2	0.295227	1.36e-28	0.425923
Leprot	0.173135	1.37e-28	0.249782
Nphp1	0.0953384	1.4e-28	0.137544
Slc2a1	0.0414801	1.4e-28	0.0598432
Plxnb1	0.128663	1.43e-28	0.185622
Trip6	0.197092	1.43e-28	0.284344
Eif3f	0.0365774	1.44e-28	0.0527701
Bmp6	0.285143	1.46e-28	0.411375
Psenen	0.0832462	1.52e-28	0.120099
Arsk	0.13659	1.58e-28	0.197058
Cacna1e	-0.227918	1.58e-28	-0.328816
Sox5	-0.225845	1.58e-28	-0.325825
Caprin1	0.0229561	1.59e-28	0.0331186
Derl1	0.091573	1.59e-28	0.132112
Eef2	-0.0247726	1.61e-28	-0.0357393
Tm9sf3	0.181417	1.63e-28	0.261729
Hsd11b1	-0.244511	1.64e-28	-0.352755
Lrpap1	-0.046395	1.64e-28	-0.0669338
Eid1	0.184522	1.65e-28	0.266209
Lrba	0.0498742	1.67e-28	0.0719532
Rab2a	0.0775212	1.68e-28	0.111839
Gbp2	0.118204	1.69e-28	0.170533
Rapgefl1	-0.175884	1.7e-28	-0.253747
Dync1i1	-0.113938	1.72e-28	-0.164377
Ptpn4	0.148124	1.73e-28	0.213698
Stxbp5l	-0.162572	1.76e-28	-0.234541
Mtss1l	0.0845835	1.77e-28	0.122028
Fgfrl1	-0.0151862	1.8e-28	-0.0219091
Mycbp2	-0.0677922	1.8e-28	-0.0978034
Tusc3	0.100062	1.82e-28	0.14436
Ghr	0.140483	1.84e-28	0.202674
Atp2b1	-0.204339	1.92e-28	-0.294798
Nrbp2	0.239597	1.94e-28	0.345666
Dazap2	0.0125388	1.98e-28	0.0180897
Vangl2	0.12232	2.01e-28	0.17647
Efcab14	0.14424	2.04e-28	0.208095
Hmgcs1	-0.185313	2.07e-28	-0.26735
Osbpl6	0.019545	2.07e-28	0.0281974
Scg5	-0.132332	2.08e-28	-0.190915
Dner	-0.114192	2.09e-28	-0.164744
Pygb	0.0474084	2.09e-28	0.0683958
Cyp46a1	0.0888326	2.12e-28	0.128158
Col5a2	0.146765	2.13e-28	0.211738
Nr3c1	0.150843	2.16e-28	0.217621
Pnn	-0.0580664	2.2e-28	-0.0837721
Arl1	0.0769827	2.21e-28	0.111063
Pla2g3	-0.190143	2.23e-28	-0.274318
Stk25	0.0351386	2.24e-28	0.0506943
Col4a5	0.13971	2.31e-28	0.201559
Ppm1e	-0.179135	2.31e-28	-0.258437
Cttnbp2nl	0.116694	2.32e-28	0.168354
Mgll	-0.0739726	2.33e-28	-0.10672
Id4	0.391023	2.35e-28	0.564127
Mapkap1	0.0546881	2.35e-28	0.0788982
Ndufb8	-0.638869	2.37e-28	-0.921693
Ocrl	-0.254508	2.42e-28	-0.367177
Phyhipl	-0.0760866	2.45e-28	-0.10977
Eml6	-0.0210942	2.46e-28	-0.0304325
Thsd7a	-0.201547	2.46e-28	-0.290771
Selk	0.123711	2.52e-28	0.178477
Csmd2	-0.147056	2.56e-28	-0.212158
Pcbp1	0.020737	2.58e-28	0.0299171
Mboat2	-0.0485483	2.6e-28	-0.0700403
Calm2	-0.224352	2.62e-28	-0.323672
Trmt1	0.173981	2.62e-28	0.251001
Axl	0.142442	2.63e-28	0.2055
Itgb8	0.16435	2.63e-28	0.237107
Med13l	0.136917	2.65e-28	0.19753
B2m	0.201887	2.66e-28	0.291262
Tiam1	-0.134755	2.76e-28	-0.19441
Large	0.0316164	2.8e-28	0.0456128
Nbea	-0.168736	2.81e-28	-0.243435
Nsf	-0.33937	2.87e-28	-0.489608
Tnc	-0.315937	2.89e-28	-0.455801
Slc25a4	0.148514	2.91e-28	0.21426
Edil3	-0.139852	2.98e-28	-0.201764
Col4a6	0.130819	2.99e-28	0.188732
Caly	-0.238631	3.02e-28	-0.344271
Dmxl2	-0.124138	3.03e-28	-0.179093
Atp6v1e1	-0.0459503	3.04e-28	-0.0662923
Pigk	-0.293151	3.07e-28	-0.422928
Tpbg	0.187957	3.08e-28	0.271164
Vps41	-0.137782	3.09e-28	-0.198777
Daam1	0.0723611	3.1e-28	0.104395
Setbp1	-0.151837	3.11e-28	-0.219054
Rab35	0.143137	3.13e-28	0.206503
Abca3	0.169953	3.16e-28	0.245191
Pfkp	0.168045	3.18e-28	0.242438
Zbtb7a	0.062531	3.18e-28	0.0902132
Tpra1	-0.0949608	3.19e-28	-0.137
Mcm9	0.122275	3.21e-28	0.176405
Abhd4	0.219883	3.23e-28	0.317224
Bcl6	0.00125582	3.23e-28	0.00181176
Rps17	-0.173235	3.23e-28	-0.249925
Sra1	0.190811	3.24e-28	0.275282
Reps2	-0.140409	3.31e-28	-0.202568
Gbe1	0.154509	3.32e-28	0.22291
Myo18a	0.059225	3.36e-28	0.0854436
Usp4	0.107754	3.36e-28	0.155456
Camk2n1	-0.184119	3.37e-28	-0.265627
Pclo	-0.190184	3.4e-28	-0.274377
Akap6	-0.136855	3.43e-28	-0.19744
Tmem126a	-0.0904906	3.44e-28	-0.13055
Irak1	0.165198	3.49e-28	0.23833
Nox4	0.13023	3.49e-28	0.187882
Igf1r	0.00901427	3.53e-28	0.0130048
Crot	0.0157962	3.57e-28	0.0227892
Acvr1	0.161392	3.59e-28	0.232839
Pard3	0.0367407	3.64e-28	0.0530056
Myo1e	0.21387	3.66e-28	0.308549
Klf9	0.0518412	3.68e-28	0.074791
Nrg2	0.208026	3.74e-28	0.300118
Dgkg	-0.173732	3.78e-28	-0.250642
Khdrbs2	-0.207444	3.78e-28	-0.299278
Lrriq1	0.115881	3.82e-28	0.16718
Ddx60	0.157023	3.85e-28	0.226536
Tspan5	-0.117569	3.89e-28	-0.169617
Epha7	-0.211239	3.9e-28	-0.304753
Scarb2	0.17463	3.91e-28	0.251937
Phlda3	0.31332	3.97e-28	0.452025
S100a1	0.406616	3.98e-28	0.586623
Trpc6	-0.135988	4.07e-28	-0.19619
Fkbp5	0.207651	4.08e-28	0.299578
Rps8	-0.0294563	4.09e-28	-0.0424965
Rae1	0.0388275	4.1e-28	0.0560162
Anapc11	-0.0191391	4.11e-28	-0.0276119
Kirrel3	-0.365844	4.12e-28	-0.527802
Sobp	0.0656645	4.15e-28	0.0947339
Rab1a	0.109277	4.16e-28	0.157654
Atp2b2	-0.196208	4.24e-28	-0.283069
Dek	0.0933962	4.31e-28	0.134742
Ubr1	0.117526	4.33e-28	0.169555
Sdc2	0.193291	4.36e-28	0.27886
Dnajb9	0.0399784	4.4e-28	0.0576766
Iqgap1	0.17377	4.41e-28	0.250698
Palm	0.171192	4.45e-28	0.246977
St13	0.0557004	4.47e-28	0.0803587
Mxi1	-0.0188607	4.5e-28	-0.0272103
Cadps	0.0669752	4.61e-28	0.0966248
Pfn2	0.167882	4.7e-28	0.242202
Asxl1	0.0462742	4.75e-28	0.0667596
Erc1	0.0291086	4.85e-28	0.0419948
Sncb	-0.255688	4.89e-28	-0.368879
Ywhae	0.0747666	4.93e-28	0.107865
Klf6	0.143478	4.95e-28	0.206995
Parp3	0.222708	5.06e-28	0.3213
Mgmt	0.163201	5.09e-28	0.235449
Pbxip1	0.424787	5.25e-28	0.612838
Grk4	0.179314	5.28e-28	0.258695
Mical3	-0.0288409	5.39e-28	-0.0416086
Trib1	0.13605	5.47e-28	0.196279
Ttll11	-0.0591917	5.47e-28	-0.0853956
Arl3	0.0063363	5.49e-28	0.00914135
Scai	0.121073	5.5e-28	0.174671
Capn2	0.0894052	5.51e-28	0.128984
Mras	-0.030404	5.52e-28	-0.0438637
Rab5c	0.263382	5.54e-28	0.37998
Rbfox3	-0.195126	5.65e-28	-0.281507
Clcn3	0.0652066	5.67e-28	0.0940732
Fxyd6	-0.321893	5.83e-28	-0.464393
Rps23	-0.0300812	5.85e-28	-0.043398
Adamtsl5	0.233816	5.89e-28	0.337325
Arl2bp	0.0457872	5.92e-28	0.066057
Gli2	0.0066389	5.96e-28	0.00957791
Isg15	0.190388	6.08e-28	0.274672
St6gal1	0.153912	6.08e-28	0.222049
Ube4b	0.078355	6.08e-28	0.113042
Rnf130	0.13413	6.15e-28	0.193508
Tmed5	0.156464	6.24e-28	0.22573
Mob3b	0.187071	6.27e-28	0.269886
Unc5d	-0.112828	6.27e-28	-0.162776
Dhrs7	0.0542069	6.31e-28	0.078204
Phip	0.0932228	6.31e-28	0.134492
Atp6v0a2	-0.0155366	6.33e-28	-0.0224146
Tomm70a	0.061531	6.54e-28	0.0887704
Gabrb2	-0.094207	6.56e-28	-0.135912
Rorc	0.25533	6.6e-28	0.368363
Nrg1	0.0568049	6.63e-28	0.0819521
Rapgef5	-0.159262	6.74e-28	-0.229766
Ndufv3	-0.0364231	6.77e-28	-0.0525474
Usp19	0.0330164	6.81e-28	0.0476327
Mecp2	0.0444621	6.82e-28	0.0641453
Eef1b2	0.035253	6.94e-28	0.0508593
Nhs	0.162337	6.98e-28	0.234203
Hspa2	0.24223	7.01e-28	0.349465
Ak2	0.0882801	7.09e-28	0.127361
Elavl1	-0.0227856	7.11e-28	-0.0328727
Rap1b	0.168484	7.11e-28	0.243071
Serhl	0.194507	7.13e-28	0.280614
Smoc1	0.337319	7.13e-28	0.486648
Appl1	-0.0334687	7.16e-28	-0.0482851
Orai1	0.0718286	7.18e-28	0.103627
Cldn10	0.499883	7.19e-28	0.721179
Rasal2	0.14292	7.19e-28	0.206189
Tmeff2	0.04143	7.3e-28	0.0597708
Med12l	-0.0998343	7.33e-28	-0.14403
Sgk1	0.041914	7.34e-28	0.0604692
Slc39a1	0.141265	7.38e-28	0.203803
Tspan13	-0.123156	7.4e-28	-0.177676
Sirt2	0.0316682	7.45e-28	0.0456875
Erbb4	-0.335703	7.53e-28	-0.484317
Plec	-0.0759707	7.54e-28	-0.109603
Mdm4	0.0166747	7.57e-28	0.0240565
Msi1	0.159053	7.61e-28	0.229464
Ptov1	-0.0422343	7.62e-28	-0.0609312
Smim7	0.0814291	7.64e-28	0.117477
Herc6	0.184645	7.65e-28	0.266387
Wsb1	0.313372	7.79e-28	0.452101
Fut9	0.0604655	7.81e-28	0.0872332
Gprc5b	-0.138156	7.81e-28	-0.199318
Wfs1	0.247055	7.85e-28	0.356425
Fgfr3	0.0521297	7.87e-28	0.0752072
Coq10b	0.245089	7.89e-28	0.353588
Syde1	0.153509	7.89e-28	0.221466
Adamts1	0.144104	7.92e-28	0.207898
Celf3	-0.0963877	8.01e-28	-0.139058
Cyb5a	-0.0659341	8.01e-28	-0.0951228
Ccdc14	0.0698231	8.08e-28	0.100733
Ttc12	0.158171	8.08e-28	0.228192
Mdh2	-0.0479466	8.11e-28	-0.0691723
Atl2	-0.00388958	8.14e-28	-0.00561147
Dnaaf3	0.144236	8.15e-28	0.208088
Cd302	0.343959	8.17e-28	0.496228
Ptprn	-0.052517	8.26e-28	-0.0757661
Fkbp1a	-0.0502523	8.31e-28	-0.0724988
Oxr1	0.140596	8.41e-28	0.202837
Them4	0.19917	8.41e-28	0.287342
Eno1	0.134209	8.59e-28	0.193623
Casp12	0.0535838	8.64e-28	0.0773051
Pard6g	0.133644	8.66e-28	0.192808
Dad1	0.0415902	8.73e-28	0.060002
Tmem18	0.0838995	8.81e-28	0.121041
Ptma	0.269166	8.91e-28	0.388324
Itpr2	0.157224	8.93e-28	0.226827
Bmp1	0.179188	8.98e-28	0.258514
Ptbp1	0.211547	8.99e-28	0.305197
Snapc3	0.00738989	9e-28	0.0106614
Ntrk3	-0.219122	9.12e-28	-0.316126
Ehd2	0.172644	9.2e-28	0.249073
Ywhah	-0.0793602	9.21e-28	-0.114493
Sh3pxd2b	0.21813	9.23e-28	0.314695
Tmem246	-0.0222287	9.32e-28	-0.0320693
Rnf182	-0.0616668	9.38e-28	-0.0889663
Ephb1	0.156598	9.42e-28	0.225924
Smim1	0.128229	9.44e-28	0.184996
Adcy9	0.100106	9.46e-28	0.144423
Msra	-0.184662	9.48e-28	-0.266411
Crb2	0.0902837	9.5e-28	0.130252
Emp1	0.0742472	9.51e-28	0.107116
Purb	0.12498	9.56e-28	0.180308
Dhrs7b	0.164132	9.58e-28	0.236793
Samd12	-0.0841948	9.65e-28	-0.121467
Tgfbr2	0.154661	9.66e-28	0.223128
Larp1	0.109323	9.67e-28	0.157719
Atp5g2	-0.0772142	9.74e-28	-0.111396
Ddx3x	0.011666	9.79e-28	0.0168304
Tceb1	-0.0549803	9.83e-28	-0.0793198
Ampd3	0.163169	1e-27	0.235403
Creb3l2	0.0156678	1e-27	0.0226039
Rasgrf1	-0.263508	1e-27	-0.380161
Gna12	-0.037867	1.01e-27	-0.0546305
Tap2	0.108842	1.01e-27	0.157025
Optn	0.136236	1.03e-27	0.196547
Slc30a9	0.0453048	1.03e-27	0.0653611
Ahcyl1	-0.184841	1.04e-27	-0.266669
Wipf3	-0.132564	1.08e-27	-0.191249
Cdh12	-0.139424	1.09e-27	-0.201147
Map7	-0.203429	1.09e-27	-0.293486
Pcdh15	-0.180246	1.09e-27	-0.26004
Bcas1	0.0866938	1.1e-27	0.125073
Slc16a11	-0.212379	1.11e-27	-0.306398
Ctso	0.0889064	1.12e-27	0.128265
Guk1	0.0898573	1.12e-27	0.129637
Kcnq1	-0.141476	1.12e-27	-0.204107
Arfip2	0.0517792	1.13e-27	0.0747016
Tuba1b	-0.086054	1.13e-27	-0.12415
Prox1	-0.183756	1.14e-27	-0.265103
Cntn1	-0.129673	1.15e-27	-0.187079
Flnc	0.137476	1.15e-27	0.198336
B4galt5	0.150157	1.19e-27	0.21663
Cnbp	0.04945	1.23e-27	0.0713413
Kdelr1	0.145339	1.23e-27	0.209681
Atat1	0.156859	1.24e-27	0.226299
Mroh5	0.159033	1.24e-27	0.229436
Ppt1	-0.0346942	1.24e-27	-0.0500531
Cdk5rap2	0.188878	1.25e-27	0.272494
Lrrc58	0.163825	1.25e-27	0.23635
Gucd1	0.0444851	1.27e-27	0.0641784
Rpl26	0.0744787	1.28e-27	0.10745
Ano3	-0.0556154	1.3e-27	-0.080236
Kif1b	0.0859639	1.3e-27	0.12402
Mrpl41	-0.0876909	1.31e-27	-0.126511
Ube2k	-0.0525876	1.32e-27	-0.0758678
Fbln5	0.145149	1.33e-27	0.209405
Acadsb	0.111134	1.34e-27	0.160333
Cebpg	0.165641	1.34e-27	0.238969
Rpl28	-0.0808073	1.34e-27	-0.11658
Baiap2	-0.2046	1.36e-27	-0.295176
Fkbp8	-0.0533235	1.36e-27	-0.0769295
Sipa1l3	-0.0913862	1.36e-27	-0.131842
Atp6ap1	0.125247	1.37e-27	0.180694
Alg8	0.148823	1.4e-27	0.214706
Sec61a2	-0.0221716	1.41e-27	-0.0319869
Trim9	-0.238186	1.41e-27	-0.343629
Gatsl2	0.116515	1.42e-27	0.168095
Nisch	0.085315	1.43e-27	0.123084
Apcdd1	0.0992258	1.44e-27	0.143153
Sorl1	0.0666754	1.44e-27	0.0961923
Brd2	0.246453	1.45e-27	0.355556
Snrnp27	-0.0549787	1.45e-27	-0.0793175
Yipf1	-0.0759144	1.45e-27	-0.109521
Armc2	0.181266	1.46e-27	0.261512
Gabbr1	0.0360914	1.46e-27	0.0520688
Kcnh7	-0.23147	1.46e-27	-0.333941
Sort1	0.111246	1.47e-27	0.160494
Sptbn4	-0.119041	1.48e-27	-0.17174
Btg1	0.0842855	1.49e-27	0.121598
Fam76a	0.107305	1.49e-27	0.154808
Hk1	0.0750571	1.5e-27	0.108284
Ltbr	0.172284	1.5e-27	0.248554
Aida	0.0746516	1.51e-27	0.1077
Tap1	0.0660103	1.54e-27	0.0952328
Trip11	0.01492	1.54e-27	0.021525
Ctnna2	-0.315987	1.55e-27	-0.455873
Pcdh11x	-0.142642	1.55e-27	-0.205788
Krcc1	0.089168	1.59e-27	0.128642
Lix1	-0.0576276	1.6e-27	-0.083139
Sertad2	0.0315887	1.6e-27	0.0455729
Col4a4	0.118923	1.61e-27	0.171569
Ctsz	0.223961	1.61e-27	0.323107
Clcf1	0.11433	1.62e-27	0.164943
Igdcc4	0.239932	1.62e-27	0.346148
Aak1	-0.0703065	1.63e-27	-0.101431
Gria4	-0.172653	1.63e-27	-0.249085
Adm	0.0516966	1.64e-27	0.0745824
Dync1h1	-0.0675792	1.64e-27	-0.0974961
Cap2	-0.218336	1.65e-27	-0.314992
Ugdh	0.21613	1.66e-27	0.31181
Celsr2	0.180105	1.69e-27	0.259837
Fbxl17	-0.0325114	1.69e-27	-0.0469041
Arhgef25	0.135108	1.7e-27	0.19492
Col9a2	0.135259	1.71e-27	0.195138
Mitd1	0.0591833	1.71e-27	0.0853835
Rbbp8	0.107125	1.71e-27	0.154549
Rundc3a	-0.125939	1.71e-27	-0.181692
Tomm40	0.108314	1.71e-27	0.156264
Lpin3	0.159031	1.72e-27	0.229434
Rela	0.0878799	1.72e-27	0.126784
Man2b2	0.0666847	1.73e-27	0.0962057
Aup1	-0.0774628	1.74e-27	-0.111755
Cacna2d1	-0.19323	1.74e-27	-0.278772
Trio	0.0487098	1.74e-27	0.0702733
Emc10	0.0750206	1.76e-27	0.108232
Mprip	0.108449	1.76e-27	0.156459
Snrnp40	0.0299873	1.77e-27	0.0432626
Mapk8ip2	0.0267099	1.79e-27	0.0385342
Thsd7b	-0.085828	1.8e-27	-0.123824
Inf2	0.109198	1.81e-27	0.15754
Lgmn	0.138703	1.83e-27	0.200106
Vmp1	0.0106958	1.84e-27	0.0154308
Cebpa	0.08812	1.86e-27	0.12713
Col9a3	-0.0691404	1.86e-27	-0.0997486
Aktip	0.0872066	1.87e-27	0.125813
Chd7	0.164031	1.87e-27	0.236647
Mfhas1	0.0523197	1.88e-27	0.0754814
Cdc27	0.118712	1.94e-27	0.171265
Med6	0.0612838	1.94e-27	0.0884138
Dnajb14	0.121069	1.95e-27	0.174666
Cxcl5	0.25665	1.99e-27	0.370268
Itga2b	0.0971445	1.99e-27	0.14015
Vwa1	0.205608	2e-27	0.29663
Xrcc5	0.19652	2.02e-27	0.283519
Dpysl2	-0.0506044	2.06e-27	-0.0730067
Mtx3	0.13679	2.07e-27	0.197347
Ccser1	-0.0162795	2.09e-27	-0.0234864
Ogfod2	0.0121347	2.09e-27	0.0175067
Emid1	0.148647	2.1e-27	0.214452
Pdgfc	0.127329	2.12e-27	0.183696
Dennd4a	0.118171	2.13e-27	0.170485
Helz2	0.0564668	2.13e-27	0.0814644
Ndufc2	0.135521	2.14e-27	0.195516
Add1	0.0114371	2.17e-27	0.0165003
Cldn11	0.0926496	2.17e-27	0.133665
Wars	0.0732243	2.17e-27	0.10564
Lmtk2	0.0402033	2.18e-27	0.058001
Kdm1a	-0.196327	2.19e-27	-0.28324
Rp9	0.0308706	2.21e-27	0.0445368
Cox14	-0.194024	2.22e-27	-0.279918
Igsf1	0.0994569	2.22e-27	0.143486
Ncam1	-0.0929876	2.22e-27	-0.134153
Cnot6	0.0653252	2.23e-27	0.0942443
Tceal3	-0.0930035	2.25e-27	-0.134176
Atp5j2	0.0509574	2.27e-27	0.073516
Erp29	0.102577	2.28e-27	0.147988
Asah1	0.0451135	2.31e-27	0.065085
Fam124a	0.077419	2.31e-27	0.111692
Rpl5	0.113519	2.32e-27	0.163773
Npc2	0.031585	2.33e-27	0.0455675
Pdzrn4	-0.105725	2.33e-27	-0.152529
Ak5	-0.210556	2.34e-27	-0.303768
Ccdc50	0.0567986	2.34e-27	0.081943
Ddah1	0.478624	2.35e-27	0.690508
Trpm6	0.0648372	2.35e-27	0.0935403
Adcyap1r1	-0.0193299	2.4e-27	-0.0278871
Kif5b	0.0320355	2.41e-27	0.0462174
Nf1	-0.00947025	2.42e-27	-0.0136627
Cav1	0.141874	2.43e-27	0.204681
Ston2	0.0358362	2.43e-27	0.0517007
Adprhl2	0.0152897	2.44e-27	0.0220583
Serinc3	0.0771953	2.45e-27	0.111369
Clptm1	0.082328	2.46e-27	0.118774
Ggt7	0.00164438	2.47e-27	0.00237234
Kidins220	0.14173	2.47e-27	0.204472
Hspa9	0.0502254	2.48e-27	0.0724599
Abcc4	0.141649	2.49e-27	0.204356
Plch1	0.166043	2.49e-27	0.239549
Mag	-0.207879	2.52e-27	-0.299905
Pdia3	0.0874548	2.52e-27	0.126171
Sccpdh	0.0917613	2.52e-27	0.132384
Gng5	-0.0436774	2.53e-27	-0.0630132
Mafk	0.0487839	2.53e-27	0.0703803
Ddhd1	0.0970719	2.54e-27	0.140045
Tspyl2	-0.107486	2.55e-27	-0.15507
Arl15	-0.113066	2.57e-27	-0.16312
Trappc6b	-0.159184	2.57e-27	-0.229654
Acyp2	0.0852496	2.59e-27	0.122989
Ror1	-0.0811002	2.6e-27	-0.117003
Ddx58	0.109146	2.62e-27	0.157464
Impa1	0.128569	2.62e-27	0.185487
Clpx	-0.0332138	2.64e-27	-0.0479174
Nav2	0.0126955	2.64e-27	0.0183157
Lamtor1	0.109735	2.65e-27	0.158314
Unc50	0.133321	2.66e-27	0.192341
Micu1	0.118063	2.67e-27	0.170329
Atf4	0.153399	2.69e-27	0.221308
Ccdc80	0.120346	2.69e-27	0.173623
Lsm14a	0.0966788	2.71e-27	0.139478
Bcap31	0.228436	2.73e-27	0.329564
Selt	0.0540285	2.73e-27	0.0779467
Traf3	0.0612019	2.73e-27	0.0882957
Vwa8	0.0212914	2.73e-27	0.0307171
Ascc3	0.10041	2.74e-27	0.144861
Sumf2	0.0827363	2.78e-27	0.119363
Exoc6b	0.0156572	2.8e-27	0.0225886
Fggy	0.0479224	2.81e-27	0.0691374
Ppp1cb	0.0161244	2.81e-27	0.0232626
Cxxc5	0.0418762	2.82e-27	0.0604146
Slc22a17	-0.0697574	2.89e-27	-0.100639
Has2	0.04722	2.91e-27	0.0681241
Eva1b	0.107738	2.93e-27	0.155433
Tsc22d3	-0.119888	2.93e-27	-0.172962
Grik5	-0.123092	3.03e-27	-0.177585
Il13ra1	0.0921041	3.03e-27	0.132878
Os9	-0.0233672	3.03e-27	-0.0337117
Rassf2	-0.121411	3.05e-27	-0.175159
S100a10	0.294726	3.05e-27	0.4252
Kifc2	-0.255883	3.06e-27	-0.369161
Slc25a3	0.177509	3.07e-27	0.256091
Slc7a14	-0.131211	3.07e-27	-0.189298
Cmss1	0.0972373	3.08e-27	0.140284
Pde4dip	-0.0881666	3.08e-27	-0.127198
Pttg1ip	-0.0371676	3.09e-27	-0.0536215
Suds3	-0.051859	3.12e-27	-0.0748167
Clmn	0.107974	3.14e-27	0.155773
Usp50	0.098861	3.17e-27	0.142626
Spin1	0.117456	3.2e-27	0.169453
Arid5a	0.155451	3.23e-27	0.224269
Dpysl4	0.184968	3.24e-27	0.266852
Abr	-0.257228	3.25e-27	-0.371102
Ago2	0.170213	3.27e-27	0.245565
Ormdl3	0.0687817	3.31e-27	0.099231
Rplp1	0.0433012	3.32e-27	0.0624704
Bms1	0.0698417	3.34e-27	0.10076
Hace1	0.0573545	3.34e-27	0.0827451
Sft2d1	0.0295101	3.36e-27	0.042574
Usp25	0.142265	3.37e-27	0.205245
Atp5b	0.0388993	3.4e-27	0.0561198
Spock3	-0.170693	3.4e-27	-0.246258
Cmpk1	0.0319149	3.41e-27	0.0460435
Sez6l2	-0.176699	3.42e-27	-0.254923
Dbi	0.248657	3.43e-27	0.358736
Ptprs	0.0170167	3.43e-27	0.02455
Arntl	-0.220516	3.44e-27	-0.318137
Pkd1	0.0666295	3.46e-27	0.0961261
Itga6	0.0879435	3.48e-27	0.126876
Zmat2	-0.0217504	3.53e-27	-0.0313792
Ncoa7	0.0829062	3.57e-27	0.119608
Cd27	0.0841885	3.58e-27	0.121458
Gtf3c3	0.13687	3.59e-27	0.197461
Kmt2d	-0.00584744	3.59e-27	-0.00843608
Grip1	0.18007	3.61e-27	0.259786
Vps35	0.0637909	3.61e-27	0.0920309
Rps19	0.0288516	3.63e-27	0.0416241
Tfcp2l1	0.185545	3.64e-27	0.267685
Erlec1	-0.0310409	3.66e-27	-0.0447826
Tssc4	0.0408545	3.66e-27	0.0589405
Cdk14	-0.101453	3.67e-27	-0.146366
Atxn2	0.0512342	3.7e-27	0.0739154
Derl2	0.153843	3.74e-27	0.221949
Synpr	-0.237113	3.75e-27	-0.342082
Pou2f1	-0.0986797	3.76e-27	-0.142365
Rnf5	0.133144	3.76e-27	0.192086
Dock1	0.163856	3.85e-27	0.236394
Rsad2	0.109107	3.86e-27	0.157408
Ccnl2	-0.128594	3.87e-27	-0.185521
Mef2c	-0.186652	3.87e-27	-0.269282
Hes5	-0.179413	3.88e-27	-0.258838
Usp45	-0.0714887	3.9e-27	-0.103136
Sctr	0.154623	3.93e-27	0.223074
Rin3	0.0456311	3.98e-27	0.0658318
Map3k10	0.107857	4.01e-27	0.155605
Ints6	0.0395686	4.03e-27	0.0570855
Kank2	0.199082	4.03e-27	0.287215
Cers6	-0.124015	4.04e-27	-0.178916
Clip1	-0.112351	4.04e-27	-0.162088
Rtca	0.064658	4.04e-27	0.0932818
Zfpm2	0.0307824	4.04e-27	0.0444096
Cript	0.00831978	4.05e-27	0.0120029
Flna	0.274164	4.05e-27	0.395535
Papd4	0.114541	4.09e-27	0.165247
Ust	-0.101377	4.09e-27	-0.146257
Pla2g12a	0.0901174	4.1e-27	0.130012
Arel1	-0.0235135	4.11e-27	-0.0339228
Hk2	0.0586593	4.11e-27	0.0846275
Smg1	0.0141902	4.13e-27	0.0204721
Hipk1	0.0657768	4.15e-27	0.0948958
Nr1h2	0.0463615	4.17e-27	0.0668855
Actl6a	-0.0518129	4.19e-27	-0.0747502
Spon1	-0.156313	4.19e-27	-0.225513
Capzb	-0.0105071	4.21e-27	-0.0151585
Cyb5b	0.142042	4.22e-27	0.204923
Zcchc7	0.00371649	4.27e-27	0.00536177
Hipk2	0.0131557	4.29e-27	0.0189797
Atf2	-0.0754023	4.3e-27	-0.108782
Gltp	0.105267	4.31e-27	0.151868
Phtf1	0.111106	4.31e-27	0.160292
Iscu	0.0942715	4.43e-27	0.136005
Fbxw7	-0.0967587	4.47e-27	-0.139593
Golim4	-0.0697002	4.47e-27	-0.100556
Creb5	0.0947959	4.48e-27	0.136762
Gfpt2	0.0922126	4.5e-27	0.133035
St18	-0.188049	4.5e-27	-0.271297
Cacnb4	-0.159442	4.52e-27	-0.230026
Lmo7	-0.0684264	4.52e-27	-0.0987184
Dusp22	0.0212181	4.53e-27	0.0306112
Phactr1	-0.234081	4.53e-27	-0.337707
Ephx1	0.14128	4.56e-27	0.203823
Tspyl1	-0.171377	4.61e-27	-0.247245
Met	0.143358	4.63e-27	0.206821
Slc30a5	0.0497006	4.63e-27	0.0717027
Kif9	0.0836674	4.67e-27	0.120706
Prkag2	-0.155059	4.7e-27	-0.223702
Fam32a	0.0775722	4.74e-27	0.111913
Tmcc3	-0.0245179	4.74e-27	-0.0353719
Kxd1	0.14438	4.78e-27	0.208297
Wipf2	0.0983375	4.78e-27	0.141871
Sfxn1	0.19262	4.79e-27	0.277892
Jarid2	-0.0942916	4.81e-27	-0.136034
Taldo1	0.0747304	4.81e-27	0.107813
Frmd5	-0.12403	4.83e-27	-0.178938
Lypla2	0.153511	4.83e-27	0.22147
Myo16	0.14372	4.85e-27	0.207344
Tulp4	0.0121243	4.86e-27	0.0174916
Fuca1	0.0949877	4.95e-27	0.137038
Eif4e	-0.100867	4.96e-27	-0.14552
Lyrm5	0.14324	4.97e-27	0.206651
Wasf1	-0.181868	4.98e-27	-0.26238
Cacna1a	-0.113921	4.99e-27	-0.164353
Myo6	0.183835	5e-27	0.265218
Gemin7	-0.00988306	5.01e-27	-0.0142582
Ndel1	0.0104395	5.01e-27	0.015061
Slc6a6	-0.169371	5.01e-27	-0.24435
Nrsn1	-0.06478	5.05e-27	-0.0934578
Rpl35a	-0.137961	5.07e-27	-0.199035
Abhd16a	0.0690847	5.09e-27	0.0996682
Sh3glb1	0.0789995	5.12e-27	0.113972
Mpp5	0.0156316	5.13e-27	0.0225517
Kmt2e	-0.0446577	5.16e-27	-0.0644275
Rps12	0.132485	5.18e-27	0.191136
Tagln3	0.524206	5.18e-27	0.75627
Txlnb	0.107141	5.19e-27	0.154572
Fam69b	-0.239782	5.21e-27	-0.345933
Napa	0.0721178	5.21e-27	0.104044
Cltc	-0.0577752	5.27e-27	-0.0833519
Mfsd10	0.0657989	5.29e-27	0.0949277
Dcun1d5	0.130788	5.33e-27	0.188687
Etnk1	-0.125431	5.33e-27	-0.180959
Pfdn5	0.0593287	5.33e-27	0.0855932
Pip4k2a	0.0595437	5.34e-27	0.0859034
Gaa	0.105115	5.36e-27	0.151649
Esrrg	-0.141108	5.39e-27	-0.203575
Timp4	-0.113723	5.42e-27	-0.164068
Il1r1	0.0993469	5.53e-27	0.143327
Nalcn	0.142606	5.53e-27	0.205737
Tomm7	0.172864	5.53e-27	0.249391
Klhl29	-0.0673271	5.54e-27	-0.0971324
Kcnn2	-0.102603	5.62e-27	-0.148025
Pigp	0.114869	5.64e-27	0.165721
Csrnp3	-0.0928451	5.67e-27	-0.133947
Gpr107	0.0371337	5.68e-27	0.0535726
Id3	0.224662	5.69e-27	0.324119
Hnrnph2	0.0166998	5.7e-27	0.0240927
Chst11	0.0338366	5.77e-27	0.0488159
Myo1c	0.0406877	5.78e-27	0.0586999
Ranbp10	0.0795927	5.79e-27	0.114828
Usf2	-0.0807034	5.85e-27	-0.11643
Tsn	-0.00028532	5.86e-27	-0.00041163
Arpp21	-0.111239	5.92e-27	-0.160483
Nr2f1	0.164241	5.93e-27	0.23695
Nfic	-0.0806702	5.96e-27	-0.116382
Lrrk1	0.127257	6e-27	0.183593
Pdzd4	-0.0727362	6.01e-27	-0.104936
Slc17a7	-0.176627	6.02e-27	-0.254819
Heg1	0.0868776	6.03e-27	0.125338
Casp8	0.0949476	6.04e-27	0.13698
Setd5	-0.048786	6.04e-27	-0.0703833
Cdh13	-0.134014	6.05e-27	-0.193341
Kcnk2	-0.245937	6.06e-27	-0.354812
Lmo4	0.0107433	6.06e-27	0.0154992
Mbtps1	0.0872542	6.11e-27	0.125881
Tmem106a	0.0855419	6.13e-27	0.123411
Luc7l3	0.0182088	6.16e-27	0.0262698
Dpyd	0.0888912	6.26e-27	0.128243
Dscaml1	-0.0800589	6.26e-27	-0.115501
Ly6e	-0.142475	6.27e-27	-0.205548
Emc6	0.107898	6.28e-27	0.155664
Pqlc3	0.0666834	6.28e-27	0.0962038
Inpp5f	0.0330035	6.3e-27	0.047614
Scrn1	0.0890885	6.31e-27	0.128528
Hecw1	-0.0993821	6.33e-27	-0.143378
Pias2	-0.161628	6.34e-27	-0.233179
Rrp12	0.068216	6.34e-27	0.0984149
Vamp4	-0.0435637	6.35e-27	-0.0628491
Rnf122	0.116116	6.36e-27	0.167519
Zfyve21	-0.100745	6.36e-27	-0.145345
Arhgef9	0.00869052	6.38e-27	0.0125378
Tbce	0.0900939	6.42e-27	0.129978
Dnm1	-0.142183	6.5e-27	-0.205126
Prr7	0.0692462	6.51e-27	0.0999012
Cers4	0.163932	6.56e-27	0.236504
Itga7	0.0374753	6.58e-27	0.0540655
Mmp19	0.0934363	6.58e-27	0.1348
Sema4d	0.0572861	6.58e-27	0.0826463
Exoc4	0.162506	6.64e-27	0.234447
Ankrd55	-0.169216	6.66e-27	-0.244128
Atraid	0.111367	6.66e-27	0.160669
Otud7b	0.0233345	6.67e-27	0.0336646
Atxn3	0.0936346	6.69e-27	0.135086
Rnd3	0.0795102	6.69e-27	0.114709
Aox1	-0.00833511	6.7e-27	-0.012025
Ppp1r12b	0.152795	6.72e-27	0.220436
Adra1a	0.0897858	6.79e-27	0.129534
Khdrbs3	-0.063417	6.86e-27	-0.0914914
Ptprk	-0.0715067	6.86e-27	-0.103162
Gucy1a2	0.0507021	6.89e-27	0.0731476
Bop1	0.112404	6.95e-27	0.162164
Tmem14c	-0.0780965	6.95e-27	-0.112669
Thbs2	0.074876	6.97e-27	0.108023
Gprasp1	0.110366	7e-27	0.159225
Mapk15	0.0523291	7.01e-27	0.075495
Cdc73	0.0986496	7.06e-27	0.142321
Rhot1	-0.0522094	7.07e-27	-0.0753223
Zfyve26	-0.0516797	7.09e-27	-0.074558
Sgcz	-0.163815	7.13e-27	-0.236335
Ccbe1	-0.096322	7.14e-27	-0.138963
Epb41	0.0843084	7.14e-27	0.121631
Sars	0.011301	7.14e-27	0.0163039
Ttc3	-0.0917254	7.16e-27	-0.132332
Rttn	0.0903426	7.19e-27	0.130337
Tob1	0.0533596	7.21e-27	0.0769817
Asna1	0.15841	7.23e-27	0.228538
Shroom2	0.109994	7.24e-27	0.158688
Tmem101	0.113284	7.24e-27	0.163435
Ywhaz	-0.0416873	7.28e-27	-0.0601421
Wasf2	0.100139	7.32e-27	0.14447
Cyb5d2	-0.0455056	7.33e-27	-0.0656507
Tm9sf2	0.0620125	7.33e-27	0.0894651
Lemd2	0.120948	7.34e-27	0.174491
Mex3c	0.110299	7.34e-27	0.159129
Spred3	0.115522	7.4e-27	0.166662
Malsu1	-0.0460101	7.41e-27	-0.0663786
Gatad2b	-0.124036	7.44e-27	-0.178946
Stau1	0.00208475	7.44e-27	0.00300766
Adrbk2	-0.19983	7.45e-27	-0.288294
Rabgap1l	-0.113562	7.5e-27	-0.163835
Arhgap35	-0.110148	7.52e-27	-0.158911
Cluh	0.176708	7.52e-27	0.254936
Kctd6	-0.0477602	7.52e-27	-0.0689033
Wdfy2	0.0498723	7.53e-27	0.0719505
Klhdc2	-0.037311	7.54e-27	-0.0538283
Zfand6	0.0906347	7.54e-27	0.130758
Camk2n2	0.101081	7.56e-27	0.14583
Wdr47	0.0699792	7.58e-27	0.100959
Ctnna1	0.237126	7.6e-27	0.342101
Stradb	0.0666717	7.61e-27	0.0961869
Ssh2	0.107208	7.66e-27	0.154669
Szrd1	0.163175	7.75e-27	0.235412
Rrbp1	0.16276	7.76e-27	0.234813
Fam69a	-0.098944	7.77e-27	-0.142746
Akap8l	-0.130303	7.78e-27	-0.187987
Sec24d	0.108659	7.84e-27	0.156762
Wdr73	0.172803	7.85e-27	0.249302
Napg	0.127933	7.87e-27	0.184568
Sox6	0.222968	7.88e-27	0.321675
Parp8	-0.105842	7.89e-27	-0.152697
Gnai1	-0.211169	7.9e-27	-0.304652
Paqr6	-0.0705438	7.92e-27	-0.101773
Ltbp3	0.0744559	7.93e-27	0.107417
Atxn10	-0.029122	7.95e-27	-0.0420141
Gskip	0.00653345	7.96e-27	0.00942577
Usp47	0.059468	7.97e-27	0.0857941
Coa3	-0.103166	7.98e-27	-0.148838
Pkd1l1	0.0327341	7.99e-27	0.0472253
Rogdi	-0.172547	8.01e-27	-0.248933
Ss18	0.140372	8.05e-27	0.202514
Tmem192	0.0204387	8.05e-27	0.0294868
Acadl	0.113803	8.06e-27	0.164182
Hgf	0.151862	8.06e-27	0.21909
Itfg1	0.128071	8.07e-27	0.184767
Gata4	0.0840668	8.1e-27	0.121283
Btaf1	-0.021905	8.16e-27	-0.0316022
Kcnt2	-0.0720009	8.16e-27	-0.103875
Plxnb2	0.0920962	8.16e-27	0.132867
Sirpa	0.151123	8.17e-27	0.218024
Rusc2	0.0165348	8.18e-27	0.0238547
Polr2g	0.0114939	8.2e-27	0.0165822
Wnk2	-0.451985	8.21e-27	-0.652076
Mpp6	0.0690996	8.22e-27	0.0996897
Hdac7	0.0475622	8.27e-27	0.0686178
Csde1	0.06439	8.33e-27	0.0928951
Bhlhe41	0.0517278	8.34e-27	0.0746275
Tmx3	-0.118524	8.37e-27	-0.170994
Grid2	-0.191529	8.45e-27	-0.276317
Pvrl3	0.137759	8.48e-27	0.198745
Lpcat3	0.11507	8.5e-27	0.166011
Rtn3	0.0493688	8.51e-27	0.0712241
Eif3a	0.125402	8.52e-27	0.180917
Wbp1l	0.133118	8.53e-27	0.192049
Sorcs1	-0.08652	8.55e-27	-0.124822
Zwint	-0.0717775	8.55e-27	-0.103553
Cnih4	0.110783	8.59e-27	0.159827
Nrf1	-0.0007251	8.63e-27	-0.0010461
Arhgef26	0.09653	8.7e-27	0.139263
Dbp	-0.0856133	8.7e-27	-0.123514
Ergic2	-0.0318614	8.73e-27	-0.0459662
Ybx3	0.135743	8.73e-27	0.195836
Fam135b	-0.124183	8.74e-27	-0.179158
Plscr4	0.201861	8.76e-27	0.291224
Porcn	-0.0765919	8.78e-27	-0.110499
Evi5	0.056781	8.81e-27	0.0819177
Ranbp1	-0.00456426	8.85e-27	-0.00658484
Klc3	0.168447	8.86e-27	0.243018
Fam174a	0.0863487	8.89e-27	0.124575
Atpif1	-0.146726	8.91e-27	-0.211681
Cops2	0.0601385	9.01e-27	0.0867615
Pde2a	-0.0447711	9.01e-27	-0.0645911
Rgma	0.140198	9.05e-27	0.202263
Mtch1	-0.0435978	9.08e-27	-0.0628984
Nr1h3	0.0429124	9.14e-27	0.0619095
Ribc2	0.050252	9.15e-27	0.0724983
Fbxl12	0.154072	9.28e-27	0.222279
Mapk1	-0.237286	9.29e-27	-0.342332
Arl10	0.0821985	9.32e-27	0.118587
Cdkn2d	0.0660651	9.34e-27	0.0953118
Idh2	0.151327	9.36e-27	0.218318
Ddx24	-0.115384	9.4e-27	-0.166464
Dynll2	0.0304957	9.42e-27	0.043996
Sez6l	-0.0844719	9.44e-27	-0.121867
Tmem30a	-0.0269319	9.45e-27	-0.0388546
Arpc5	0.324069	9.46e-27	0.467533
Scnm1	0.0162016	9.46e-27	0.023374
Fam195b	-0.0229358	9.48e-27	-0.0330893
Rapgef1	-0.00926096	9.5e-27	-0.0133607
Iffo1	-0.0485671	9.53e-27	-0.0700676
Psmb2	-0.250234	9.54e-27	-0.361011
Lman2	0.0405279	9.58e-27	0.0584695
Epha10	-0.0842706	9.59e-27	-0.121577
Myl6	-0.0627323	9.63e-27	-0.0905036
Prkce	-0.258556	9.67e-27	-0.373017
Ppp2r5c	0.0895674	9.69e-27	0.129218
Zmynd8	-0.251447	9.69e-27	-0.362762
Naca	-0.0602085	9.72e-27	-0.0868625
Stau2	0.0766705	9.77e-27	0.110612
Pigs	0.0712546	9.79e-27	0.102799
Sptan1	0.0114838	9.79e-27	0.0165676
Syne3	0.112304	9.79e-27	0.16202
Tcf4	0.0453152	9.79e-27	0.065376
Abhd3	0.0579764	9.8e-27	0.0836423
Twf1	0.078197	9.84e-27	0.112814
Ppp1r9a	-0.0188066	9.86e-27	-0.0271322
Lamc1	0.0516298	9.95e-27	0.0744861
Ddx3y	-0.0561019	1.02e-26	-0.080938
M6pr	0.0695439	1.02e-26	0.100331
Mbd5	7.33e-05	1.02e-26	0.00010575
Actr2	-0.105618	1.03e-26	-0.152375
Gpr158	-0.154672	1.03e-26	-0.223145
Atp6v1g1	-0.00635428	1.04e-26	-0.00916729
Cdon	-0.0949387	1.04e-26	-0.136968
Ptpn3	-0.0815484	1.04e-26	-0.117649
Usp9x	0.0190017	1.04e-26	0.0274136
Aes	-0.150113	1.05e-26	-0.216567
Rhobtb3	-0.0753451	1.05e-26	-0.1087
Gabrg3	-0.088455	1.06e-26	-0.127614
Mecr	-0.152575	1.06e-26	-0.22012
Parp4	0.105685	1.06e-26	0.152472
Pum1	0.0180662	1.06e-26	0.0260641
Rnf220	-0.064284	1.06e-26	-0.0927422
Heatr1	0.0854802	1.07e-26	0.123322
Insig2	0.170576	1.08e-26	0.24609
Ost4	-0.0671825	1.08e-26	-0.0969239
Pigm	0.074775	1.08e-26	0.107877
Socs1	0.0613166	1.08e-26	0.0884612
Suco	0.0656593	1.08e-26	0.0947263
Dpagt1	0.0116682	1.09e-26	0.0168337
Mrps33	-0.00138909	1.09e-26	-0.00200404
Mtmr6	0.0469502	1.09e-26	0.0677349
Rhbdl3	0.0945487	1.09e-26	0.136405
Tbck	0.102735	1.09e-26	0.148215
Asap3	0.102941	1.1e-26	0.148512
Ddx54	0.0904587	1.1e-26	0.130504
Inpp4b	-0.11627	1.1e-26	-0.167743
Srebf2	0.0928875	1.1e-26	0.134008
Cacybp	-0.0866231	1.11e-26	-0.124971
Fpgs	0.0868928	1.11e-26	0.12536
Mnat1	-0.092632	1.11e-26	-0.13364
Psmd6	0.0122223	1.11e-26	0.0176331
Rc3h2	0.00764852	1.11e-26	0.0110345
Chmp4b	0.0972199	1.13e-26	0.140259
Hectd1	0.0920358	1.13e-26	0.13278
Lamtor3	0.00604362	1.13e-26	0.0087191
Mllt4	-0.0378447	1.13e-26	-0.0545984
Ptpn5	0.06064	1.13e-26	0.0874851
Trappc10	0.093408	1.13e-26	0.134759
Lsm1	0.053213	1.14e-26	0.0767701
Mdh1	-0.0975102	1.14e-26	-0.140677
Prkar1a	0.0576599	1.14e-26	0.0831857
Sirt5	-0.129785	1.14e-26	-0.18724
Arhgef33	0.04598	1.15e-26	0.0663351
Flot2	0.10188	1.15e-26	0.146982
Ncdn	-0.0129153	1.15e-26	-0.0186328
Prelid1	0.0830535	1.15e-26	0.119821
Slc44a2	0.0659542	1.15e-26	0.0951518
Sv2b	-0.030964	1.15e-26	-0.0446716
Wbscr27	0.0998019	1.15e-26	0.143984
Cul2	0.133749	1.16e-26	0.19296
Kpna3	0.0567513	1.17e-26	0.0818748
Pex5	0.0993712	1.17e-26	0.143362
Pfkfb3	0.0612286	1.17e-26	0.0883342
Serpini1	-0.195512	1.17e-26	-0.282065
Ankrd27	-0.00184371	1.19e-26	-0.00265991
Armc8	0.0307636	1.2e-26	0.0443825
Cuedc2	0.0394	1.2e-26	0.0568422
Ndufaf6	0.118821	1.2e-26	0.171422
Tbc1d19	0.000383318	1.2e-26	0.000553011
Amd1	-0.0379336	1.21e-26	-0.0547266
Galnt16	-0.0422552	1.21e-26	-0.0609613
Tcf12	-0.134097	1.21e-26	-0.193461
Ap1b1	0.0894599	1.22e-26	0.129063
Zfp64	0.0668393	1.22e-26	0.0964287
Gbp5	0.0598494	1.23e-26	0.0863444
Grn	0.107131	1.23e-26	0.154557
Pcca	-0.117828	1.23e-26	-0.169989
Sphkap	-0.106263	1.23e-26	-0.153306
Gspt1	0.0119375	1.24e-26	0.0172221
Pde1a	-0.227655	1.24e-26	-0.328436
Trove2	0.0215511	1.24e-26	0.0310916
Bloc1s2	0.0213232	1.25e-26	0.0307629
Dok6	0.0934042	1.25e-26	0.134754
Chsy3	-0.0726063	1.26e-26	-0.104749
Fcgr2b	0.188845	1.26e-26	0.272445
Gnptg	-0.0737642	1.26e-26	-0.106419
Nefl	0.0500434	1.26e-26	0.0721973
Sp1	0.0910792	1.26e-26	0.1314
Iqch	0.0179671	1.27e-26	0.025921
Mllt3	0.0444038	1.27e-26	0.0640612
Cnpy3	-0.0196237	1.28e-26	-0.0283111
Smad1	0.182151	1.28e-26	0.262788
Pdcd10	0.0282452	1.29e-26	0.0407492
Ramp2	-0.0828408	1.29e-26	-0.119514
Pigv	0.0778266	1.3e-26	0.11228
Abcc5	0.023754	1.31e-26	0.0342698
Coq4	0.121167	1.31e-26	0.174807
Faim	0.0408312	1.32e-26	0.0589069
Gde1	-0.160382	1.32e-26	-0.231383
Pdlim2	0.0681445	1.32e-26	0.0983118
Cbfb	0.121232	1.33e-26	0.1749
Lin52	0.0829027	1.34e-26	0.119603
Rps11	0.0659655	1.34e-26	0.0951681
Scrg1	0.506119	1.34e-26	0.730176
Lamb2	0.0596706	1.36e-26	0.0860865
Atxn1	0.0468804	1.37e-26	0.0676341
Rprd2	0.0238579	1.37e-26	0.0344197
Tmem132a	-0.0802362	1.37e-26	-0.115756
Vps45	-0.0133906	1.38e-26	-0.0193186
Ctbp1	0.0789252	1.39e-26	0.113865
Mpc1	0.106956	1.39e-26	0.154305
Ppp1r12a	0.033578	1.39e-26	0.0484428
Rmdn2	0.13646	1.39e-26	0.19687
Slc16a1	0.151833	1.39e-26	0.219049
Snapin	0.112563	1.39e-26	0.162394
Dnlz	0.0887201	1.4e-26	0.127996
Htt	0.162169	1.4e-26	0.23396
Phyh	0.0625354	1.4e-26	0.0902195
Yeats2	0.000505949	1.4e-26	0.00072993
Bola2	-0.189789	1.41e-26	-0.273808
Gk5	0.0706071	1.41e-26	0.101865
Katnb1	0.137897	1.41e-26	0.198943
Kcna2	-0.0356963	1.41e-26	-0.0514989
Ndufa7	0.134208	1.41e-26	0.193621
Trrap	0.00210415	1.41e-26	0.00303565
Nmnat2	-0.164254	1.42e-26	-0.236969
Prkcg	-0.0839003	1.43e-26	-0.121043
Etv5	-0.144749	1.44e-26	-0.208828
Ppm1f	0.0698669	1.44e-26	0.100797
Rlf	-0.0471081	1.44e-26	-0.0679626
Sun1	0.0410483	1.44e-26	0.0592201
Rufy2	-0.0709787	1.45e-26	-0.102401
Stat1	0.1287	1.45e-26	0.185675
Ybx1	-0.0309631	1.45e-26	-0.0446703
Cgrrf1	0.142264	1.46e-26	0.205243
Cpsf4	0.0426888	1.46e-26	0.0615869
Idh3g	-0.110839	1.46e-26	-0.159907
Igsf10	0.0292359	1.46e-26	0.0421785
Ap2a2	-0.0100212	1.47e-26	-0.0144575
Cope	0.0205438	1.47e-26	0.0296384
Lta4h	0.104452	1.47e-26	0.150692
Myo5a	-0.0645296	1.47e-26	-0.0930965
Bhlhe40	0.141963	1.48e-26	0.20481
Ccdc171	0.0577272	1.48e-26	0.0832827
Kcnip1	-0.12768	1.48e-26	-0.184203
Rnf213	0.0518097	1.48e-26	0.0747455
Gnb2l1	-0.0342043	1.49e-26	-0.0493463
Trim33	0.0066448	1.49e-26	0.00958642
Usmg5	0.0312373	1.49e-26	0.0450659
Daw1	0.0578549	1.5e-26	0.0834669
Ncald	-0.14477	1.5e-26	-0.20886
Bet1l	-0.101723	1.51e-26	-0.146756
Hey2	0.0981538	1.51e-26	0.141606
Insr	0.0461205	1.51e-26	0.0665378
Nmt2	-0.00577216	1.51e-26	-0.00832747
Smox	-0.194376	1.51e-26	-0.280426
Mtmr11	0.131383	1.52e-26	0.189546
Cops4	-0.121699	1.53e-26	-0.175575
Heca	0.0523379	1.53e-26	0.0755076
Pcyt2	-0.456191	1.53e-26	-0.658144
Abhd12	-0.00674951	1.54e-26	-0.00973748
Bcap29	0.0506328	1.54e-26	0.0730477
Ctif	0.0276324	1.54e-26	0.0398651
Taf15	0.0158977	1.54e-26	0.0229355
Zmat4	-0.0854671	1.54e-26	-0.123303
Eef2k	0.0944227	1.55e-26	0.136223
Bptf	0.0120675	1.56e-26	0.0174097
Col5a3	0.072453	1.56e-26	0.104528
Fam120a	-0.0344821	1.56e-26	-0.0497471
Tbc1d9b	0.0282316	1.56e-26	0.0407296
Usp9y	0.0358036	1.56e-26	0.0516537
Men1	0.0377087	1.57e-26	0.0544021
Slc35a2	0.0458238	1.57e-26	0.0661098
Tmed10	0.0498006	1.57e-26	0.0718471
Sfrp1	0.197564	1.58e-26	0.285024
Trak2	0.00745048	1.58e-26	0.0107488
Emc3	-0.00984741	1.6e-26	-0.0142068
Arpc1b	0.0744576	1.61e-26	0.10742
Uqcrc1	-0.049655	1.61e-26	-0.0716371
Agap1	-0.0382532	1.62e-26	-0.0551877
Ctnna3	-0.248983	1.62e-26	-0.359206
Tinf2	0.10154	1.62e-26	0.146491
Gmps	-0.0138157	1.63e-26	-0.0199318
Syne2	0.152515	1.63e-26	0.220033
Atp5f1	0.0343295	1.64e-26	0.049527
Exoc5	0.0357638	1.64e-26	0.0515963
Bin1	-0.103222	1.65e-26	-0.148917
Cxcl10	0.0707457	1.65e-26	0.102064
Nadk	-0.0210521	1.65e-26	-0.0303717
Slc12a2	0.104417	1.66e-26	0.150642
Atp13a1	-0.119167	1.67e-26	-0.171922
Lpgat1	0.0734435	1.67e-26	0.105957
Rnf38	0.124266	1.67e-26	0.179278
Pkp4	-0.00078687	1.68e-26	-0.00113521
Sdhc	-0.00928486	1.68e-26	-0.0133952
Unc13b	-0.127371	1.68e-26	-0.183758
Dennd6b	-0.085538	1.69e-26	-0.123405
Mapk8ip1	-0.0134687	1.69e-26	-0.0194313
Mrpl38	0.0135153	1.69e-26	0.0194984
Pcmtd2	0.0187573	1.69e-26	0.027061
Git2	0.0736757	1.7e-26	0.106292
Smpdl3a	0.407628	1.71e-26	0.588083
Spock1	-0.0795539	1.72e-26	-0.114772
Cd82	0.00586955	1.73e-26	0.00846797
Slc25a35	0.0837592	1.73e-26	0.120839
Slc26a6	0.0239939	1.73e-26	0.0346159
Fbxo11	0.0436959	1.74e-26	0.0630399
Lsm4	-0.0864329	1.74e-26	-0.124696
Sgpl1	0.114182	1.74e-26	0.16473
Cenpv	-0.0472604	1.75e-26	-0.0681823
Nedd4l	-0.00870635	1.75e-26	-0.0125606
Serf2	0.0055351	1.75e-26	0.00798547
Dbnl	0.0585403	1.76e-26	0.0844559
Lfng	-0.158484	1.76e-26	-0.228643
Limk2	0.135071	1.76e-26	0.194866
Usp38	0.0826669	1.77e-26	0.119263
Dpcd	0.0337803	1.78e-26	0.0487347
Gdi1	-0.131966	1.78e-26	-0.190387
Gipc1	0.0869605	1.78e-26	0.125457
Hadh	0.195494	1.78e-26	0.282039
Psmb4	0.0361696	1.78e-26	0.0521816
Ccs	0.0278475	1.79e-26	0.0401755
Stard3nl	-0.0756912	1.8e-26	-0.109199
Apold1	0.0396902	1.81e-26	0.0572608
Wbp2	0.0333333	1.81e-26	0.0480898
Epdr1	0.233829	1.82e-26	0.337344
Rpsa	0.0875333	1.82e-26	0.126284
Abhd17b	0.0362967	1.83e-26	0.0523651
Ptk2b	-0.179567	1.83e-26	-0.259061
Rtn4rl1	-0.0792548	1.83e-26	-0.114341
Smc4	0.116792	1.83e-26	0.168495
Trim8	0.102383	1.83e-26	0.147708
Atp1a3	-0.198217	1.84e-26	-0.285966
Gna14	0.0431866	1.84e-26	0.0623051
Trap1	0.0945168	1.84e-26	0.136359
Trim24	-0.129582	1.84e-26	-0.186948
Apod	-0.174838	1.85e-26	-0.252239
Cped1	-0.190642	1.85e-26	-0.275038
Fars2	0.145566	1.85e-26	0.210008
Rac1	-0.0517167	1.85e-26	-0.0746114
Elavl3	-0.149175	1.86e-26	-0.215214
Epb41l1	0.0711219	1.86e-26	0.102607
Piezo1	0.0875053	1.86e-26	0.126243
Rpl37a	0.122368	1.86e-26	0.176539
Rpl4	-0.0536622	1.86e-26	-0.0774182
Ryk	-0.0268221	1.86e-26	-0.0386962
Med27	-0.0696749	1.87e-26	-0.10052
Pycr2	-0.0120775	1.87e-26	-0.0174241
Crebzf	0.0455506	1.88e-26	0.0657157
Pacrg	0.174047	1.88e-26	0.251097
Arhgap20	-0.081356	1.89e-26	-0.117372
Dpy19l3	0.085132	1.89e-26	0.12282
Usp37	0.0398702	1.89e-26	0.0575206
Adora1	0.0643009	1.91e-26	0.0927666
Tnrc6a	0.0260326	1.91e-26	0.0375571
Tshz2	-0.179705	1.91e-26	-0.259259
Atad1	-0.0649508	1.92e-26	-0.0937041
Ccdc25	-0.000556866	1.93e-26	-0.000803388
Zscan26	-0.203609	1.93e-26	-0.293746
Lmln	0.030145	1.94e-26	0.0434901
Ptpn2	0.149349	1.94e-26	0.215465
Rab11fip3	-0.00776315	1.94e-26	-0.0111999
Atp9a	-0.0508248	1.95e-26	-0.0733247
Kcnd3	-0.0222073	1.95e-26	-0.0320384
Anxa7	0.119249	1.96e-26	0.172041
Nrp2	-0.160263	1.96e-26	-0.23121
Tnks1bp1	0.0571387	1.97e-26	0.0824337
Anapc10	0.00740511	1.99e-26	0.0106833
Smarcc1	0.0278223	1.99e-26	0.0401391
Timm17a	-0.105599	1.99e-26	-0.152347
Zc3h14	-0.0662975	1.99e-26	-0.0956471
Ppdpf	0.0636214	2e-26	0.0917862
Sox4	0.179451	2e-26	0.258894
Dusp18	0.0501314	2.01e-26	0.0723244
Klf7	0.13745	2.01e-26	0.198298
Magt1	0.0541629	2.01e-26	0.0781406
Cherp	0.113576	2.02e-26	0.163855
Hnrnpd	0.0693249	2.02e-26	0.100015
Ubl3	0.113403	2.02e-26	0.163607
Fam163a	-0.294888	2.03e-26	-0.425434
Tst	0.20021	2.03e-26	0.288842
Carhsp1	0.191274	2.04e-26	0.275951
Cd300lf	0.0819283	2.04e-26	0.118198
Ptpn11	-0.196053	2.04e-26	-0.282845
Sptssa	0.207018	2.04e-26	0.298664
Tmem128	0.0861398	2.04e-26	0.124273
Hes1	-0.071447	2.05e-26	-0.103076
Pls3	-0.0742868	2.05e-26	-0.107173
Atp1a1	-0.0834602	2.06e-26	-0.120408
Csnk1g1	-0.0380853	2.06e-26	-0.0549455
Klf3	0.105205	2.06e-26	0.151778
Siah3	0.142557	2.08e-26	0.205667
Slc35b4	-0.0384935	2.08e-26	-0.0555344
Sv2a	-0.090818	2.08e-26	-0.131023
Ankrd33b	0.00135617	2.09e-26	0.00195655
Bsg	0.0987421	2.09e-26	0.142455
Kif5a	-0.0522208	2.09e-26	-0.0753387
Lxn	0.237319	2.1e-26	0.342378
Acss3	0.274886	2.11e-26	0.396577
Arid5b	0.0661747	2.11e-26	0.0954699
Csnk1d	0.0720816	2.11e-26	0.103992
Mrpl49	0.0268229	2.11e-26	0.0386973
Rpl15	0.108383	2.11e-26	0.156364
Abtb2	0.194393	2.12e-26	0.28045
Sos2	0.0989357	2.12e-26	0.142734
Tspan12	0.117315	2.12e-26	0.16925
Cdk5rap3	0.150388	2.14e-26	0.216964
Cog4	0.0991204	2.15e-26	0.143001
Hspa8	0.127926	2.15e-26	0.184558
Fech	0.0725295	2.16e-26	0.104638
Fyn	0.0871987	2.16e-26	0.125801
Tbl1xr1	0.0705999	2.16e-26	0.101854
Cog1	-0.00406387	2.17e-26	-0.00586293
Bin3	0.0524872	2.19e-26	0.075723
Ica1	-0.110296	2.19e-26	-0.159123
Nop16	0.0673113	2.19e-26	0.0971096
Plekhg5	-0.116679	2.19e-26	-0.168332
Slco2a1	0.0873356	2.19e-26	0.125999
Tmem147	-0.0378939	2.19e-26	-0.0546694
Ccdc73	0.0309792	2.2e-26	0.0446935
Mthfd2l	0.0931565	2.2e-26	0.134396
Fbxw9	0.0543526	2.21e-26	0.0784143
Polr2d	0.0281748	2.21e-26	0.0406477
Tbcel	-0.0666595	2.21e-26	-0.0961694
Zdhhc14	-0.0147923	2.21e-26	-0.0213407
Rsu1	0.101883	2.22e-26	0.146986
Chic2	-0.0343695	2.24e-26	-0.0495846
Vhl	-0.0309011	2.24e-26	-0.0445809
Cbx5	0.0688346	2.25e-26	0.0993073
Dgkz	-0.119087	2.25e-26	-0.171807
Rmdn3	-0.151244	2.25e-26	-0.218199
Sltm	-0.000713307	2.25e-26	-0.00102908
Timm9	0.120383	2.25e-26	0.173676
P4htm	-0.00859653	2.26e-26	-0.0124022
Ube2g1	0.0795158	2.26e-26	0.114717
Arf4	0.174273	2.27e-26	0.251422
Sipa1l1	-0.0509783	2.27e-26	-0.0735462
Tle2	-0.265604	2.27e-26	-0.383186
Apbb2	0.00175687	2.28e-26	0.00253463
Setd2	0.0673827	2.28e-26	0.0972126
Tsen54	0.0627995	2.29e-26	0.0906005
Snrpd3	0.000400597	2.3e-26	0.000577939
Tmed7	0.0587969	2.31e-26	0.0848261
Txlng	0.0343119	2.31e-26	0.0495017
Gsap	0.323469	2.32e-26	0.466667
Tshz1	-0.00670193	2.32e-26	-0.00966883
Prrx2	0.136548	2.33e-26	0.196998
Ccdc30	0.0522041	2.34e-26	0.0753146
Dnajc10	-0.00321491	2.34e-26	-0.00463814
Dync1li2	-0.0309569	2.34e-26	-0.0446613
Mark4	0.11155	2.34e-26	0.160932
Nedd4	0.132452	2.34e-26	0.191088
Nfib	-0.0101866	2.34e-26	-0.0146961
Cabin1	0.0210411	2.35e-26	0.0303559
Max	-0.0717681	2.35e-26	-0.10354
Srgn	0.105974	2.35e-26	0.152889
Add2	-0.0693581	2.37e-26	-0.100063
Crlf1	-0.140534	2.38e-26	-0.202747
Dnajb4	0.0914547	2.4e-26	0.131941
Otud4	0.14838	2.4e-26	0.214067
Spata2	0.0519742	2.4e-26	0.0749829
Cdc14a	0.179366	2.41e-26	0.258771
Chfr	-0.0465004	2.41e-26	-0.0670859
Elmo1	-0.046753	2.41e-26	-0.0674503
Gid8	-0.133612	2.41e-26	-0.192761
Ndufa2	-0.0670939	2.41e-26	-0.096796
Oraov1	0.0603489	2.41e-26	0.0870651
Ubr3	-0.0200952	2.42e-26	-0.0289912
Gsta4	-0.0402727	2.43e-26	-0.0581012
Wdr59	0.0236021	2.43e-26	0.0340506
Pcid2	-0.0346315	2.44e-26	-0.0499627
Adamts9	-0.0639257	2.45e-26	-0.0922253
Banf2	-0.0235116	2.45e-26	-0.0339201
Gphn	-0.118003	2.45e-26	-0.170243
Traf6	0.0875574	2.46e-26	0.126319
Arnt2	0.141209	2.47e-26	0.203721
Pon2	0.0986099	2.47e-26	0.142264
Hopx	0.0386132	2.48e-26	0.055707
Mapre1	0.0412282	2.48e-26	0.0594797
Slco3a1	-0.0856918	2.48e-26	-0.123627
Coq7	0.0925616	2.49e-26	0.133538
Eif5	0.0817619	2.49e-26	0.117958
Foxo3	0.084136	2.49e-26	0.121383
Mcph1	0.0900147	2.5e-26	0.129864
Rcan1	0.0700745	2.5e-26	0.101096
Smurf1	0.0770503	2.5e-26	0.11116
Cdh10	-0.204063	2.51e-26	-0.294401
Tbl1x	0.0438513	2.52e-26	0.0632641
Vwa9	0.142794	2.52e-26	0.206008
Arl6	0.0519474	2.53e-26	0.0749442
Luc7l2	0.0119622	2.53e-26	0.0172577
Setd1b	0.0959113	2.54e-26	0.138371
Glrx	0.037931	2.55e-26	0.0547228
Ralgds	0.0397487	2.55e-26	0.0573453
Serac1	-0.112432	2.55e-26	-0.162206
Abhd6	-0.233965	2.56e-26	-0.33754
Cdh11	-0.0648017	2.56e-26	-0.0934891
Lmf1	0.0648719	2.56e-26	0.0935903
Tango2	-0.0902449	2.56e-26	-0.130196
Fam71e1	0.0157272	2.57e-26	0.0226896
Map7d1	0.128651	2.57e-26	0.185604
Surf4	0.0214808	2.57e-26	0.0309902
Arrb1	0.039093	2.58e-26	0.0563993
Tmem68	-0.00144198	2.59e-26	-0.00208034
Cmip	0.0884572	2.6e-26	0.127617
Vwa5a	0.043531	2.6e-26	0.0628019
Cflar	-0.0803656	2.61e-26	-0.115943
Rnf139	0.0259105	2.61e-26	0.037381
Wdr7	-0.00349953	2.62e-26	-0.00504876
Ranbp6	0.014021	2.64e-26	0.020228
Fam107b	0.0445847	2.65e-26	0.0643221
Lix1l	0.079369	2.65e-26	0.114505
Anapc5	-0.0440111	2.66e-26	-0.0634946
Mfsd9	0.0535136	2.66e-26	0.0772038
Zcchc9	0.15502	2.66e-26	0.223646
Atp5l	-0.0179691	2.67e-26	-0.0259239
Kpna2	0.0419764	2.68e-26	0.0605591
Tmem8b	0.0141019	2.68e-26	0.0203448
Dhx9	0.0621264	2.69e-26	0.0896294
Rab24	-0.0623267	2.69e-26	-0.0899185
Rps5	0.0403612	2.69e-26	0.0582289
Ndrg1	0.16894	2.7e-26	0.243729
Slc35f5	0.0681279	2.7e-26	0.0982877
Spred1	-0.0738001	2.7e-26	-0.106471
Padi2	0.0943812	2.71e-26	0.136163
Exoc2	-0.00887477	2.72e-26	-0.0128036
Sdha	-0.0418323	2.72e-26	-0.0603513
Rab31	0.00962974	2.73e-26	0.0138928
Prpsap1	-0.0824085	2.74e-26	-0.11889
Ndufs5	-0.0730634	2.75e-26	-0.105408
Invs	0.0210069	2.76e-26	0.0303066
Jph1	-0.118373	2.76e-26	-0.170776
Ralbp1	0.13554	2.76e-26	0.195543
Caln1	-0.153486	2.77e-26	-0.221433
Ccdc6	0.0757376	2.77e-26	0.109266
H2afv	0.12053	2.77e-26	0.173889
Hey1	0.0424949	2.77e-26	0.0613072
Nip7	-0.032668	2.77e-26	-0.0471299
Sult6b1	0.0797397	2.77e-26	0.11504
Trhde	-0.0703936	2.77e-26	-0.101556
Kmt2c	-0.0936871	2.78e-26	-0.135162
Mbnl1	0.129693	2.78e-26	0.187108
Prelp	0.180713	2.78e-26	0.260713
Zbtb4	0.103221	2.78e-26	0.148917
Fam175b	0.0867784	2.79e-26	0.125195
Itih3	0.202131	2.8e-26	0.291613
Ndufa1	-0.0929741	2.82e-26	-0.134133
Slc25a27	0.0190198	2.82e-26	0.0274397
Nt5c3b	0.0404712	2.83e-26	0.0583876
Brd4	-0.0568056	2.84e-26	-0.0819532
Fam63b	0.0691838	2.85e-26	0.0998111
Hs3st3a1	0.10786	2.85e-26	0.155609
Arih2	0.038546	2.86e-26	0.0556101
Bcar1	0.102439	2.86e-26	0.147788
Ctage5	-0.0150364	2.86e-26	-0.021693
Rab11a	0.0527059	2.86e-26	0.0760385
Gpbp1	-0.0242532	2.87e-26	-0.0349899
Negr1	-0.348123	2.87e-26	-0.502236
Bcl2l13	0.0371841	2.88e-26	0.0536453
Ephb6	0.102814	2.88e-26	0.14833
Eri3	-0.0776848	2.88e-26	-0.112075
Gm2a	0.18101	2.88e-26	0.261142
Npffr1	0.0429666	2.88e-26	0.0619877
Gpr37	0.0327832	2.89e-26	0.0472961
Osbp2	-0.0677596	2.89e-26	-0.0977565
Wdr92	-0.109736	2.9e-26	-0.158316
Cd14	0.0724344	2.91e-26	0.104501
Ddhd2	-0.0460537	2.91e-26	-0.0664414
Med28	0.0722066	2.91e-26	0.104172
Pcnx	-0.134226	2.91e-26	-0.193647
Rcan2	0.301073	2.91e-26	0.434357
Abcc1	0.0784961	2.92e-26	0.113246
Phb2	-0.0735186	2.93e-26	-0.106065
Eif4h	-0.0459162	2.94e-26	-0.0662431
Med15	-0.101404	2.94e-26	-0.146295
Ski	0.224649	2.94e-26	0.324099
Eva1c	0.0916793	2.97e-26	0.132265
Rpl19	-0.0526524	2.97e-26	-0.0759613
Nfia	0.0914651	2.99e-26	0.131956
Fcer1g	-0.146585	3.01e-26	-0.211478
Ncoa1	-0.117279	3.01e-26	-0.169197
Nos1ap	-0.187954	3.01e-26	-0.27116
Ralb	0.134186	3.01e-26	0.193589
Socs6	0.120778	3.01e-26	0.174246
Galnt13	-0.0743809	3.02e-26	-0.107309
Kcnn3	0.0371348	3.03e-26	0.0535743
Cd320	-0.0850893	3.04e-26	-0.122758
Foxo1	0.114331	3.04e-26	0.164945
Hibadh	0.0161095	3.04e-26	0.023241
Kptn	-0.165492	3.04e-26	-0.238754
Cachd1	0.0778966	3.05e-26	0.112381
Smarcc2	-0.0619266	3.05e-26	-0.0893413
Sssca1	0.0779466	3.05e-26	0.112453
Cacna1b	-0.00902222	3.06e-26	-0.0130163
Plscr1	0.0548653	3.06e-26	0.0791539
Wdr34	-0.00868781	3.06e-26	-0.0125339
Wipf1	0.0852326	3.06e-26	0.122965
Rhoj	0.227869	3.08e-26	0.328745
Tmod2	0.202049	3.08e-26	0.291495
Msantd3	0.0705676	3.09e-26	0.101807
Pdcd6	0.0794961	3.09e-26	0.114689
Smad5	0.0595812	3.09e-26	0.0859575
Paics	-0.00161075	3.1e-26	-0.00232381
Sepp1	0.0715363	3.1e-26	0.103205
Fam188a	0.0598583	3.11e-26	0.0863572
Tfb2m	-0.108623	3.11e-26	-0.15671
Fez2	0.175091	3.13e-26	0.252603
Rpl39	0.0832506	3.13e-26	0.120105
Vps13c	-0.0775793	3.13e-26	-0.111923
Gpx7	0.0740348	3.14e-26	0.10681
Tmem56	0.0616762	3.14e-26	0.08898
Aimp2	0.111584	3.15e-26	0.160981
Smim11	-0.0216238	3.15e-26	-0.0311966
Sntg2	0.0799027	3.15e-26	0.115275
Tmem219	0.0459133	3.15e-26	0.0662389
Pabpc1	0.0659667	3.16e-26	0.0951699
Rdx	0.115611	3.16e-26	0.166791
Egfr	0.114528	3.17e-26	0.165228
Dlx2	0.027015	3.19e-26	0.0389745
Limd2	-0.095607	3.19e-26	-0.137932
Ube2d1	-0.0543582	3.19e-26	-0.0784223
Nin	0.0161747	3.2e-26	0.0233351
Ddb1	0.132209	3.21e-26	0.190737
Nup214	0.049436	3.21e-26	0.0713211
Chrm1	-0.0471871	3.22e-26	-0.0680766
Col25a1	-0.110639	3.22e-26	-0.159619
Eif4b	0.175449	3.22e-26	0.253119
Nars2	-0.0718656	3.22e-26	-0.10368
S100a13	0.134748	3.22e-26	0.1944
Kctd3	0.0618933	3.23e-26	0.0892932
Ssr3	0.0301216	3.24e-26	0.0434563
Hmgn3	-0.0458825	3.25e-26	-0.0661945
Ntmt1	0.0601408	3.25e-26	0.0867649
Parp11	0.0465479	3.26e-26	0.0671544
Fbxo33	0.00123354	3.27e-26	0.00177962
Gpld1	0.164121	3.27e-26	0.236777
Loxl1	0.0708062	3.27e-26	0.102152
Odc1	0.101582	3.27e-26	0.146552
Rbmxl1	0.080144	3.27e-26	0.115623
Bicc1	0.10329	3.28e-26	0.149016
Fbxl19	-0.0315606	3.28e-26	-0.0455323
Prrc2a	0.0491311	3.28e-26	0.0708812
Haghl	-0.0499522	3.29e-26	-0.0720658
Tgfbr1	0.0359842	3.29e-26	0.0519142
Reps1	0.026275	3.31e-26	0.0379068
Mcur1	0.148411	3.32e-26	0.214112
Pawr	0.17619	3.32e-26	0.254188
Basp1	-0.143797	3.33e-26	-0.207456
Rundc1	0.0461555	3.33e-26	0.0665883
Zc3h12a	0.0556333	3.33e-26	0.0802618
Gpd1l	0.0857934	3.34e-26	0.123774
Spry3	0.0121284	3.34e-26	0.0174975
Slc22a18	0.0794011	3.35e-26	0.114552
Sod1	-0.0552045	3.35e-26	-0.0796432
Hspb6	0.108698	3.36e-26	0.156818
Ndufa12	-0.125084	3.36e-26	-0.180458
Cops3	0.0308449	3.37e-26	0.0444998
Proca1	0.120098	3.37e-26	0.173265
Mtss1	0.00662144	3.38e-26	0.00955272
Cthrc1	0.0426595	3.39e-26	0.0615447
Dtnb	-0.0707545	3.39e-26	-0.102077
Galnt18	-0.240057	3.39e-26	-0.346329
Wbp5	-0.184355	3.39e-26	-0.265968
Nck1	-0.00530537	3.4e-26	-0.00765403
Rpl6	-0.110511	3.4e-26	-0.159434
Snx14	-0.00744319	3.4e-26	-0.0107383
Speg	-0.0170225	3.4e-26	-0.0245583
Trak1	-0.055005	3.4e-26	-0.0793555
Zfp36l1	0.2533	3.4e-26	0.365434
Slc43a2	0.140448	3.41e-26	0.202624
Bola1	0.142445	3.42e-26	0.205505
Nanos1	0.0322194	3.42e-26	0.0464828
Plekhj1	-0.106945	3.42e-26	-0.154289
Suox	0.0672902	3.42e-26	0.0970792
Rab14	0.090207	3.43e-26	0.130141
Hormad2	0.0765483	3.44e-26	0.110436
Pank2	-0.115429	3.44e-26	-0.166528
Vps26a	0.036918	3.44e-26	0.0532614
Fam173b	0.134189	3.45e-26	0.193595
Elmod1	-0.135052	3.46e-26	-0.194838
Rgl2	0.0504971	3.46e-26	0.0728519
Top2a	0.0652377	3.46e-26	0.0941181
Rpl18a	-0.0434654	3.47e-26	-0.0627073
Dnajc2	0.0572331	3.48e-26	0.0825699
Kcnq2	-0.081394	3.48e-26	-0.117427
Tgfbr3	-0.0236505	3.48e-26	-0.0341205
Dnajc24	-0.059247	3.49e-26	-0.0854754
Lman1	0.128473	3.49e-26	0.185348
Polr3f	-0.0266343	3.49e-26	-0.0384252
Prkcb	-0.180911	3.49e-26	-0.260999
Slc16a2	-0.0412369	3.5e-26	-0.0594923
Dhdds	0.000219209	3.51e-26	0.000316252
Ndufa10	-0.109212	3.51e-26	-0.157559
Akap11	0.0487217	3.52e-26	0.0702906
Fyb	0.0778158	3.52e-26	0.112264
Phka1	-0.190421	3.52e-26	-0.27472
Klhl15	-0.0231304	3.53e-26	-0.0333701
Mapkapk2	0.0495815	3.53e-26	0.071531
Zfp62	0.0793318	3.53e-26	0.114452
Faim2	-0.104521	3.54e-26	-0.150793
Mgst3	0.132263	3.55e-26	0.190815
Dcakd	0.120497	3.57e-26	0.17384
Rbm11	0.0870765	3.57e-26	0.125625
Zxdc	0.0977826	3.57e-26	0.141071
Ddx1	-0.0861784	3.58e-26	-0.124329
Tanc1	-0.121952	3.59e-26	-0.17594
Armcx3	0.0850639	3.6e-26	0.122721
Pfn1	-0.0389088	3.6e-26	-0.0561336
Sf3b3	-0.0342951	3.6e-26	-0.0494774
Tmem214	0.0027769	3.61e-26	0.00400622
Hspb11	0.0199265	3.62e-26	0.0287479
Man1c1	0.0800882	3.62e-26	0.115543
Polr2l	-0.0170608	3.62e-26	-0.0246136
Rpl24	0.0278376	3.62e-26	0.0401611
Selo	0.00131163	3.62e-26	0.00189228
Usp18	0.078233	3.63e-26	0.112866
Chd1l	-0.074463	3.64e-26	-0.107427
Gpr161	0.101287	3.64e-26	0.146126
Syt13	-0.0743429	3.64e-26	-0.107254
Gtpbp4	0.0307868	3.65e-26	0.044416
Zbtb11	-0.0655077	3.66e-26	-0.0945076
Dync2h1	-0.0412499	3.67e-26	-0.059511
Bmper	0.163124	3.69e-26	0.235338
Hsdl2	-0.0144525	3.69e-26	-0.0208505
Mien1	-0.148423	3.71e-26	-0.214129
Tmem185b	0.0769609	3.71e-26	0.111031
Cdk2ap1	-0.0496319	3.73e-26	-0.0716037
Skap2	0.190528	3.73e-26	0.274874
Ctdsp2	0.022425	3.74e-26	0.0323524
Khnyn	0.070816	3.75e-26	0.102166
Ranbp9	0.137882	3.76e-26	0.198922
Ssbp4	-0.00215059	3.76e-26	-0.00310265
Vash1	-0.018821	3.76e-26	-0.027153
Eny2	0.143365	3.77e-26	0.206833
Rheb	-0.0224539	3.77e-26	-0.0323942
Tpcn2	0.0643996	3.79e-26	0.092909
Dph5	0.142843	3.81e-26	0.206078
Nxph1	-0.0293163	3.81e-26	-0.0422944
Rpl18	0.049876	3.82e-26	0.0719559
Usp29	-0.0300797	3.83e-26	-0.0433959
Atp5e	0.181186	3.85e-26	0.261396
Rragc	0.0876826	3.85e-26	0.126499
Psmc5	-0.0956065	3.86e-26	-0.137931
Spock2	-0.140567	3.86e-26	-0.202796
Acsl6	0.159751	3.87e-26	0.230472
Prmt6	0.0595603	3.87e-26	0.0859273
Elac1	0.0457162	3.89e-26	0.0659545
Ptpn21	0.0691489	3.89e-26	0.0997607
Rpain	-0.0430944	3.9e-26	-0.062172
Tiprl	0.0520729	3.9e-26	0.0751253
Cers5	0.0600232	3.91e-26	0.0865952
Emp3	0.0879285	3.91e-26	0.126854
Kremen1	0.115742	3.91e-26	0.166981
Rplp0	-0.0810308	3.92e-26	-0.116903
Emb	-0.11169	3.93e-26	-0.161135
Pdpr	-0.104898	3.94e-26	-0.151336
Snx2	0.0205032	3.94e-26	0.0295799
Otud7a	-0.24708	3.95e-26	-0.356461
Trpc5	-0.121388	3.98e-26	-0.175126
Ccdc90b	0.0631009	3.99e-26	0.0910353
Lrrc8b	0.022744	3.99e-26	0.0328126
Nle1	-0.0957849	4e-26	-0.138188
Ttc8	0.186225	4e-26	0.268666
Asf1a	-0.0678296	4.01e-26	-0.0978574
Pde4a	0.0229891	4.01e-26	0.0331663
Commd8	0.20158	4.02e-26	0.290818
Inpp5j	-0.116584	4.02e-26	-0.168195
Cnot10	-0.0189757	4.03e-26	-0.0273761
Dnm2	0.0121996	4.03e-26	0.0176002
Pias3	0.0110042	4.03e-26	0.0158758
Trank1	-0.105008	4.04e-26	-0.151494
Ankrd52	0.0661074	4.05e-26	0.0953728
Mtpap	0.038281	4.05e-26	0.0552278
Atf5	0.0860467	4.08e-26	0.124139
Gfpt1	-0.00535429	4.09e-26	-0.00772461
Ppp2r5b	0.152456	4.1e-26	0.219948
Rfx3	0.0742197	4.11e-26	0.107076
Sfmbt1	0.1071	4.11e-26	0.154513
Bub3	-0.00549139	4.12e-26	-0.0079224
Chchd6	-0.108019	4.13e-26	-0.155839
Prr14l	-0.0581732	4.14e-26	-0.0839262
Fzr1	-0.00839612	4.15e-26	-0.012113
Ubqln2	0.228373	4.15e-26	0.329473
Wdfy3	0.110161	4.15e-26	0.158929
Abat	-0.116475	4.16e-26	-0.168038
Pon3	0.0509054	4.16e-26	0.073441
Ppp3cc	0.111709	4.16e-26	0.161162
Ralgps1	-0.0910933	4.17e-26	-0.13142
Grm8	-0.115119	4.18e-26	-0.166082
Tnk2	0.0663633	4.19e-26	0.095742
Prkcz	-0.0820565	4.2e-26	-0.118382
Pigb	0.0833381	4.21e-26	0.120232
Lamb3	0.0498418	4.22e-26	0.0719066
Tmem65	0.0963137	4.22e-26	0.138951
Tspo	0.100872	4.24e-26	0.145528
Ctnnbl1	-0.0292008	4.25e-26	-0.0421279
Ccp110	0.0476945	4.26e-26	0.0688086
Flnb	0.0841942	4.26e-26	0.121467
Pigq	0.13414	4.26e-26	0.193523
Npepps	0.131457	4.27e-26	0.189653
Sucla2	-0.0420979	4.27e-26	-0.0607345
Arl5a	0.0354462	4.29e-26	0.0511381
Stat6	0.0212515	4.3e-26	0.0306594
Rock1	0.138557	4.31e-26	0.199896
Acer3	-0.0275126	4.32e-26	-0.0396923
Scamp2	0.0415326	4.32e-26	0.0599189
Hpca	-0.0382342	4.34e-26	-0.0551603
Psme2	0.0550449	4.34e-26	0.079413
Raver1	-0.135151	4.35e-26	-0.194981
Birc6	0.0402364	4.36e-26	0.0580488
Qpctl	0.0550009	4.37e-26	0.0793495
Srpr	-0.156575	4.37e-26	-0.225889
Dzank1	-0.0483202	4.38e-26	-0.0697113
Rbms1	0.11476	4.39e-26	0.165564
Rrp7a	-0.045746	4.39e-26	-0.0659975
Mkl1	-0.0691205	4.41e-26	-0.0997199
Tdrd3	0.067869	4.41e-26	0.0979143
Pcgf5	0.00472901	4.43e-26	0.00682253
Plxna1	0.0510852	4.43e-26	0.0737004
Nrxn3	-0.323052	4.45e-26	-0.466065
Snph	0.0267007	4.45e-26	0.038521
Spop	0.0677064	4.45e-26	0.0976796
Abcg2	-0.142511	4.46e-26	-0.2056
Haus2	0.0566668	4.46e-26	0.0817529
Camta2	-0.0845772	4.51e-26	-0.122019
Eif2ak1	0.0906704	4.51e-26	0.13081
Ankib1	0.032019	4.53e-26	0.0461937
Stx17	0.0594791	4.53e-26	0.0858103
Trim35	-0.111327	4.53e-26	-0.160611
Ifnk	0.109946	4.54e-26	0.158619
Parp2	-0.0743705	4.54e-26	-0.107294
App	-0.0186159	4.55e-26	-0.0268571
Tor2a	0.107094	4.55e-26	0.154503
Txn2	0.050602	4.55e-26	0.0730033
[truncated: 10,512 more rows]

## Sheet: INTERACTOME GENE
Gene symbol
A2M
ADORA2B
AHNAK
ANK2
ANK3
ANKS1B
ANTXR1
ANXA2
APOE
BCL3
CALM2
CAMK2A
CAMK2B
CAMK2D
CAMK2N1
CD44
CD63
CD81
CD9
CDH2
CEBPB
CHL1
CLIC1
CLU
CST3
CTNNA1
CTSB
CTSD
CYBRD1
DCC
DDOST
DDR1
DDX5
DLG2
DLGAP2
DMD
DST
ENAH
EPHA4
EPHA7
ERBB2IP
ERBB4
EZR
FAM171B
FAS
FGFR1
FGFR2
FLNA
FOS
GAB2
GABARAPL2
GFAP
GRIA1
GRID2
GRIN1
GRIN2A
GRIN2B
GRIN3A
GRM5
GRM7
GSN
GSTP1
HDAC4
HSPA5
ICAM1
IFIT3
ILF2
IQGAP1
ISG15
LGALS1
LGALS3BP
LRP1
LRRC7
MAP2
MAPK1
MSN
MYO10
MYO6
MYOC
NEK6
NFKB1
NRG2
NRG3
PDZD2
PHKB
PIK3R1
PRDX1
PRDX6
PRKCB
PRKCE
PTBP1
PTPN11
PTPN12
RPL23A
RPS6KB2
S100A10
S100B
SKI
SLC1A5
SLC3A2
SNCA
SRA1
SSFA2
STAT3
TCP1
TJP1
TNFRSF1A
TNIK
TSPAN3
TUBA1A
TUBA4A
TUBB2A
TUBB2B
VCAM1
VIM
XRCC5

## Sheet: INTERACTOME PPI
Protein A	Protein B
A2M	APOE
A2M	CTSB
A2M	DDOST
A2M	HSPA5
A2M	IFIT3
A2M	LRP1
A2M	MYOC
A2M	STAT3
ADORA2B	EZR
ADORA2B	DCC
ANK2	GABARAPL2
ANK2	TNIK
ANK2	DMD
ANK2	CHL1
ANK3	PIK3R1
ANK3	FAS
ANK3	CHL1
ANXA2	CTSB
ANXA2	MYOC
ANXA2	VCAM1
ANXA2	GABARAPL2
ANXA2	TNIK
ANXA2	FGFR1
ANXA2	FLNA
ANXA2	NFKB1
ANXA2	PRKCB
ANXA2	RPS6KB2
ANXA2	S100A10
ANXA2	IQGAP1
ANXA2	ISG15
ANXA2	AHNAK
APOE	CTSB
APOE	IFIT3
APOE	LRP1
APOE	VCAM1
APOE	MAP2
BCL3	STAT3
BCL3	NFKB1
BCL3	FOS
BCL3	FGFR2
CALM2	MYO6
CALM2	GRM5
CALM2	GRM7
CAMK2A	FLNA
CAMK2A	VIM
CAMK2A	GFAP
CAMK2A	GRIA1
CAMK2A	CD44
CAMK2A	CEBPB
CAMK2A	SNCA
CAMK2A	GRIN1
CAMK2A	LRRC7
CAMK2A	CAMK2B
CAMK2A	CAMK2D
CAMK2A	GRIN2A
CAMK2A	GRIN2B
CAMK2B	PHKB
CAMK2B	CAMK2D
CAMK2B	GRIN2A
CAMK2B	GRIN2B
CAMK2D	VIM
CAMK2D	MAPK1
CAMK2D	HDAC4
CAMK2D	FAM171B
CAMK2D	GRIN2B
CD44	STAT3
CD44	FGFR1
CD44	FLNA
CD44	IQGAP1
CD44	LGALS1
CD44	MSN
CD44	FGFR2
CD44	EZR
CD44	SLC3A2
CD44	ERBB4
CD63	CD81
CD63	TSPAN3
CD81	MYOC
CD81	FLNA
CD81	S100A10
CD81	TUBA1A
CD81	TUBA4A
CD81	MSN
CD81	TUBB2A
CD81	TUBB2B
CD81	DDX5
CD81	RPL23A
CD81	XRCC5
CD9	LGALS3BP
CD9	CD81
CD9	SLC3A2
CD9	CD63
CDH2	PIK3R1
CDH2	CTNNA1
CDH2	PTPN12
CDH2	GRIN1
CDH2	LRRC7
CEBPB	STAT3
CEBPB	NFKB1
CEBPB	MAPK1
CEBPB	HDAC4
CLIC1	MYOC
CLIC1	VCAM1
CLIC1	IQGAP1
CLIC1	ISG15
CLU	HSPA5
CLU	TNIK
CLU	NFKB1
CLU	FOS
CST3	CTSB
CST3	CTSD
CST3	PDZD2
CTNNA1	HSPA5
CTNNA1	DMD
CTNNA1	PIK3R1
CTNNA1	TUBA1A
CTNNA1	TJP1
CTSB	S100A10
CTSB	CTSD
CTSD	VCAM1
CTSD	MAPK1
CTSD	SNCA
DCC	MAPK1
DCC	EZR
DCC	MYO10
DDOST	VCAM1
DDOST	TNFRSF1A
DDOST	VIM
DDOST	ILF2
DDR1	NEK6
DDR1	PTPN11
DDR1	CDH2
DDX5	VCAM1
DDX5	GABARAPL2
DDX5	RPS6KB2
DDX5	FOS
DDX5	SKI
DDX5	SRA1
DLG2	GRID2
DLG2	MAPK1
DLG2	ERBB4
DLG2	DLGAP2
DLG2	GRIN1
DLG2	GRIN2A
DLG2	GRIN2B
DMD	AHNAK
DST	TNIK
DST	NFKB1
DST	IQGAP1
DST	ERBB2IP
EPHA4	FGFR1
EPHA4	EPHA7
EPHA4	TUBB2B
EPHA4	FGFR2
EPHA4	TSPAN3
EPHA7	HSPA5
EPHA7	TUBA4A
ERBB4	ANKS1B
ERBB4	PTPN11
ERBB4	GRIN1
ERBB4	NRG2
ERBB4	NRG3
EZR	GABARAPL2
EZR	IQGAP1
EZR	ISG15
EZR	AHNAK
FAS	TNFRSF1A
FAS	LGALS1
FAS	MSN
FAS	TUBB2A
FAS	TUBB2B
FAS	EZR
FAS	PTBP1
FGFR1	STAT3
FGFR1	PIK3R1
FGFR1	MAPK1
FGFR1	FGFR2
FGFR1	TSPAN3
FGFR1	PRKCE
FGFR2	STAT3
FGFR2	PIK3R1
FGFR2	TSPAN3
FGFR2	FAM171B
FLNA	VCAM1
FLNA	S100A10
FLNA	IQGAP1
FLNA	ISG15
FLNA	ILF2
FLNA	PIK3R1
FLNA	TUBA1A
FLNA	TJP1
FLNA	LGALS1
FLNA	ANTXR1
FLNA	ICAM1
FLNA	MYO6
FLNA	GSN
FLNA	GRM5
FLNA	GRM7
FLNA	SSFA2
FLNA	CYBRD1
FOS	NFKB1
FOS	MAPK1
FOS	TUBB2B
FOS	SRA1
GFAP	HSPA5
GFAP	GABARAPL2
GFAP	VIM
GFAP	NEK6
GFAP	S100B
GRIA1	HSPA5
GRIA1	GRID2
GRIN1	MAP2
GRIN1	PRKCB
GRIN1	TJP1
GRIN1	NEK6
GRIN1	PRKCE
GRIN1	GRIN2A
GRIN1	GRIN2B
GRIN1	GRIN3A
GRIN2A	GRIN3A
GRIN2B	PRKCB
GRIN2B	PTPN11
GRIN2B	PTPN12
GRIN2B	ERBB2IP
GRIN2B	GRIN3A
GRIN2B	CAMK2N1
GRM5	PRKCB
GRM5	PRKCE
GRM7	TUBA1A
GRM7	TUBA4A
GSN	TNIK
GSN	IQGAP1
GSN	PTPN12
GSN	MYO6
GSTP1	IFIT3
GSTP1	VCAM1
GSTP1	GABARAPL2
GSTP1	ISG15
GSTP1	MAPK1
GSTP1	PRDX6
HSPA5	LRP1
HSPA5	VCAM1
HSPA5	GABARAPL2
HSPA5	NFKB1
HSPA5	RPS6KB2
HSPA5	IQGAP1
HSPA5	AHNAK
HSPA5	TNFRSF1A
HSPA5	VIM
HSPA5	ILF2
HSPA5	TUBA4A
HSPA5	LGALS1
HSPA5	MSN
HSPA5	LGALS3BP
HSPA5	SKI
HSPA5	ANTXR1
ICAM1	ILF2
ICAM1	TUBA4A
ICAM1	MSN
ICAM1	RPL23A
ICAM1	XRCC5
ICAM1	EZR
ICAM1	SLC3A2
IFIT3	ISG15
ILF2	VCAM1
ILF2	GABARAPL2
ILF2	IQGAP1
ILF2	RPL23A
ILF2	XRCC5
ILF2	PTBP1
IQGAP1	ISG15
IQGAP1	CYBRD1
ISG15	AHNAK
LGALS1	VCAM1
LGALS1	NFKB1
LGALS1	LGALS3BP
LGALS1	CHL1
LGALS3BP	GABARAPL2
LGALS3BP	TUBA1A
LGALS3BP	TCP1
LGALS3BP	ENAH
LGALS3BP	PHKB
LRP1	TUBA1A
LRP1	TUBA4A
LRP1	TUBB2A
LRP1	TUBB2B
LRP1	ANKS1B
MAP2	TUBA1A
MAP2	RPL23A
MAPK1	STAT3
MAPK1	VCAM1
MAPK1	TNIK
MAPK1	IQGAP1
MAPK1	TNFRSF1A
MAPK1	PRDX6
MAPK1	HDAC4
MAPK1	GAB2
MAPK1	SNCA
MAPK1	PTPN12
MAPK1	ENAH
MSN	VCAM1
MSN	ISG15
MSN	TNFRSF1A
MSN	EZR
MYO10	TUBA1A
MYO10	TUBB2B
MYO10	ENAH
MYO6	TNFRSF1A
MYOC	TNFRSF1A
MYOC	VIM
NFKB1	STAT3
NFKB1	GABARAPL2
NFKB1	ISG15
NFKB1	VIM
NFKB1	TUBA1A
NFKB1	TUBA4A
NFKB1	TUBB2A
NFKB1	TUBB2B
NFKB1	HDAC4
NFKB1	TCP1
NFKB1	PRDX1
NFKB1	SLC1A5
PDZD2	ERBB2IP
PHKB	HDAC4
PIK3R1	STAT3
PIK3R1	TNFRSF1A
PIK3R1	EZR
PIK3R1	PTPN11
PIK3R1	DLGAP2
PIK3R1	GAB2
PRDX1	VCAM1
PRDX1	GABARAPL2
PRDX1	RPS6KB2
PRDX1	ISG15
PRDX1	TUBA1A
PRDX1	SKI
PRDX1	PRDX6
PRDX6	GABARAPL2
PRDX6	ISG15
PRKCB	STAT3
PRKCB	RPS6KB2
PRKCB	TNFRSF1A
PRKCB	PTPN11
PRKCE	STAT3
PRKCE	RPS6KB2
PRKCE	IQGAP1
PRKCE	MAPK1
PRKCE	SNCA
PTBP1	VCAM1
PTBP1	GABARAPL2
PTBP1	IQGAP1
PTBP1	ISG15
PTPN11	STAT3
PTPN11	VCAM1
PTPN11	TNFRSF1A
PTPN11	GAB2
RPL23A	VCAM1
RPL23A	GABARAPL2
RPL23A	RPS6KB2
RPS6KB2	IQGAP1
RPS6KB2	XRCC5
RPS6KB2	SLC3A2
RPS6KB2	TCP1
S100A10	AHNAK
S100B	IQGAP1
S100B	AHNAK
SKI	AHNAK
SKI	TUBA1A
SKI	TUBA4A
SKI	TUBB2A
SKI	TCP1
SLC1A5	TNFRSF1A
SLC1A5	NEK6
SLC3A2	NEK6
SNCA	VIM
SNCA	TUBA1A
SRA1	NEK6
SSFA2	IQGAP1
STAT3	NEK6
STAT3	ERBB2IP
TCP1	VCAM1
TCP1	GABARAPL2
TCP1	TUBA1A
TCP1	TUBA4A
TJP1	VIM
TJP1	TUBA1A
TNFRSF1A	TUBB2B
TNFRSF1A	EZR
TUBA1A	ANTXR1
TUBA4A	VCAM1
TUBA4A	GABARAPL2
TUBA4A	TUBA1A
TUBA4A	ANTXR1
TUBA4A	TUBB2A
TUBB2A	TNIK
TUBB2A	TUBA1A
VCAM1	IQGAP1
VCAM1	VIM
VCAM1	PRDX6
VCAM1	XRCC5
VCAM1	EZR
VIM	GABARAPL2
VIM	ISG15
VIM	NEK6
VIM	HDAC4
XRCC5	GABARAPL2
XRCC5	ISG15

## Sheet: PATHWAY ENRICHMENT
The pathway enrichment analysis is based on genes from disease network (INTERACOME GENE)
Pathway Term	# Overlapped genes	Adjusted P-value	Overlap Genes
Proteoglycans in cancer	21	2.10459e-18	CAMK2B;CD63;DDX5;CAMK2D;PRKCB;CAMK2A;STAT3;MSN;ANK2;PTPN11;ANK3;IQGAP1;PIK3R1;ERBB4;RPS6KB2;FLNA;MAPK1;FAS;EZR;CD44;FGFR1
Long-term potentiation	11	1.16806e-11	GRIA1;CAMK2B;GRM5;CAMK2D;GRIN2A;PRKCB;CAMK2A;MAPK1;GRIN2B;CALM2;GRIN1
Amphetamine addiction	11	1.16806e-11	GRIA1;CAMK2B;CAMK2D;GRIN2A;GRIN3A;PRKCB;CAMK2A;FOS;GRIN2B;CALM2;GRIN1
Circadian entrainment	11	4.94149e-10	GRIA1;CAMK2B;GRIN2A;CAMK2D;PRKCB;CAMK2A;MAPK1;FOS;GRIN2B;CALM2;GRIN1
ErbB signaling pathway	10	2.47263e-09	CAMK2B;CAMK2D;NRG3;PRKCB;ERBB4;CAMK2A;RPS6KB2;MAPK1;NRG2;PIK3R1
cAMP signaling pathway	13	1.01575e-08	GRIA1;CAMK2B;CAMK2D;CAMK2A;PIK3R1;FOS;GRIN2B;NFKB1;GRIN1;GRIN2A;GRIN3A;MAPK1;CALM2
TNF signaling pathway	10	2.34581e-08	CEBPB;VCAM1;BCL3;MAPK1;FAS;PIK3R1;FOS;NFKB1;ICAM1;TNFRSF1A
HIF-1 signaling pathway	9	1.62552e-07	CAMK2B;CAMK2D;PRKCB;CAMK2A;STAT3;RPS6KB2;MAPK1;PIK3R1;NFKB1
Ras signaling pathway	12	1.96089e-07	GRIN2A;PRKCB;MAPK1;PTPN11;PIK3R1;GAB2;GRIN2B;CALM2;NFKB1;FGFR2;FGFR1;GRIN1
Apoptosis	10	1.96089e-07	TUBA1A;MAPK1;FAS;PIK3R1;FOS;CTSD;TUBA4A;NFKB1;CTSB;TNFRSF1A
Pathways in cancer	17	1.96089e-07	CAMK2B;CAMK2D;PRKCB;DCC;GSTP1;CAMK2A;STAT3;PIK3R1;FOS;NFKB1;RPS6KB2;CTNNA1;MAPK1;FAS;CALM2;FGFR2;FGFR1
Calcium signaling pathway	11	2.05678e-07	CAMK2B;GRIN2A;GRM5;CAMK2D;PRKCB;ADORA2B;ERBB4;CAMK2A;PHKB;CALM2;GRIN1
Glutamatergic synapse	9	3.18591e-07	GRIA1;GRIN2A;GRM5;GRIN3A;GRM7;PRKCB;MAPK1;GRIN2B;GRIN1
Gap junction	8	6.13569e-07	TJP1;GRM5;TUBB2B;TUBA1A;TUBB2A;PRKCB;MAPK1;TUBA4A
Fc gamma R-mediated phagocytosis	8	7.34206e-07	GSN;MYO10;PRKCB;PRKCE;RPS6KB2;MAPK1;GAB2;PIK3R1
Alzheimer disease	10	7.34206e-07	GRIN2A;LRP1;MAPK1;FAS;APOE;GRIN2B;CALM2;TNFRSF1A;SNCA;GRIN1
Dopaminergic synapse	9	8.18612e-07	GRIA1;CAMK2B;GRIN2A;CAMK2D;PRKCB;CAMK2A;FOS;GRIN2B;CALM2
Axon guidance	10	1.11442e-06	ENAH;CAMK2B;EPHA4;EPHA7;CAMK2D;DCC;CAMK2A;MAPK1;PTPN11;PIK3R1
AGE-RAGE signaling pathway in diabetic complications	8	1.23555e-06	VCAM1;PRKCB;PRKCE;STAT3;MAPK1;PIK3R1;NFKB1;ICAM1
Kaposi sarcoma-associated herpesvirus infection	10	1.29463e-06	GABARAPL2;STAT3;MAPK1;FAS;PIK3R1;FOS;CALM2;NFKB1;ICAM1;TNFRSF1A
Insulin resistance	8	2.03498e-06	PRKCB;PRKCE;STAT3;RPS6KB2;PTPN11;PIK3R1;NFKB1;TNFRSF1A
Glioma	7	2.34838e-06	CAMK2B;CAMK2D;PRKCB;CAMK2A;MAPK1;PIK3R1;CALM2
Leukocyte transendothelial migration	8	2.46192e-06	VCAM1;PRKCB;CTNNA1;MSN;PTPN11;PIK3R1;EZR;ICAM1
Rap1 signaling pathway	10	2.78656e-06	GRIN2A;PRKCB;ADORA2B;MAPK1;PIK3R1;GRIN2B;CALM2;FGFR2;FGFR1;GRIN1
Neurotrophin signaling pathway	8	3.47326e-06	CAMK2B;CAMK2D;CAMK2A;MAPK1;PTPN11;PIK3R1;CALM2;NFKB1
Sphingolipid signaling pathway	8	3.47326e-06	PRKCB;PRKCE;MAPK1;PIK3R1;GAB2;CTSD;NFKB1;TNFRSF1A
Tuberculosis	9	7.33008e-06	CAMK2B;CAMK2D;CEBPB;CAMK2A;MAPK1;CALM2;CTSD;NFKB1;TNFRSF1A
Fluid shear stress and atherosclerosis	8	1.0517e-05	VCAM1;GSTP1;PIK3R1;FOS;CALM2;NFKB1;ICAM1;TNFRSF1A
Inflammatory mediator regulation of TRP channels	7	1.27536e-05	CAMK2B;CAMK2D;PRKCB;PRKCE;CAMK2A;PIK3R1;CALM2
Nicotine addiction	5	2.19981e-05	GRIA1;GRIN2A;GRIN3A;GRIN2B;GRIN1
B cell receptor signaling pathway	6	2.22586e-05	CD81;PRKCB;MAPK1;FOS;PIK3R1;NFKB1
Cholinergic synapse	7	2.42221e-05	CAMK2B;CAMK2D;PRKCB;CAMK2A;MAPK1;PIK3R1;FOS
Human immunodeficiency virus 1 infection	9	2.42221e-05	PRKCB;RPS6KB2;MAPK1;FAS;PIK3R1;FOS;CALM2;NFKB1;TNFRSF1A
Regulation of actin cytoskeleton	9	2.53787e-05	ENAH;GSN;MSN;MAPK1;IQGAP1;PIK3R1;EZR;FGFR2;FGFR1
Gastric acid secretion	6	2.7201e-05	CAMK2B;CAMK2D;PRKCB;CAMK2A;EZR;CALM2
Human cytomegalovirus infection	9	3.5992e-05	PRKCB;STAT3;RPS6KB2;MAPK1;FAS;PIK3R1;CALM2;NFKB1;TNFRSF1A
MAPK signaling pathway	10	4.56257e-05	PRKCB;ERBB4;FLNA;MAPK1;FAS;FOS;NFKB1;FGFR2;FGFR1;TNFRSF1A
Cocaine addiction	5	4.82794e-05	GRIN2A;GRIN3A;GRIN2B;NFKB1;GRIN1
Alcoholism	8	5.14268e-05	HDAC4;GRIN2A;GRIN3A;ADORA2B;MAPK1;GRIN2B;CALM2;GRIN1
Amyotrophic lateral sclerosis (ALS)	5	5.59816e-05	GRIA1;GRIN2A;GRIN2B;TNFRSF1A;GRIN1
Pathogenic Escherichia coli infection	5	7.88407e-05	TUBB2B;TUBA1A;TUBB2A;EZR;TUBA4A
GnRH signaling pathway	6	7.88407e-05	CAMK2B;CAMK2D;PRKCB;CAMK2A;MAPK1;CALM2
Prostate cancer	6	9.79721e-05	GSTP1;MAPK1;PIK3R1;NFKB1;FGFR2;FGFR1
Epstein-Barr virus infection	8	9.92556e-05	STAT3;FAS;ISG15;PIK3R1;VIM;NFKB1;CD44;ICAM1
Aldosterone synthesis and secretion	6	9.92556e-05	CAMK2B;CAMK2D;PRKCB;PRKCE;CAMK2A;CALM2
Melanogenesis	6	0.000115268	CAMK2B;CAMK2D;PRKCB;CAMK2A;MAPK1;CALM2
Chagas disease (American trypanosomiasis)	6	0.00012609	MAPK1;FAS;PIK3R1;FOS;NFKB1;TNFRSF1A
Oxytocin signaling pathway	7	0.000126715	CAMK2B;CAMK2D;PRKCB;CAMK2A;MAPK1;FOS;CALM2
C-type lectin receptor signaling pathway	6	0.000127747	BCL3;MAPK1;PTPN11;PIK3R1;CALM2;NFKB1
Hepatitis C	7	0.000132203	CD81;STAT3;MAPK1;FAS;PIK3R1;NFKB1;TNFRSF1A
Central carbon metabolism in cancer	5	0.000144733	MAPK1;SLC1A5;PIK3R1;FGFR2;FGFR1
Acute myeloid leukemia	5	0.000152878	STAT3;RPS6KB2;MAPK1;PIK3R1;NFKB1
Hepatitis B	7	0.000171941	PRKCB;STAT3;MAPK1;FAS;PIK3R1;FOS;NFKB1
Prolactin signaling pathway	5	0.000195729	STAT3;MAPK1;FOS;PIK3R1;NFKB1
Tight junction	7	0.000209237	TJP1;DLG2;TUBA1A;PRKCE;MSN;EZR;TUBA4A
African trypanosomiasis	4	0.000209237	VCAM1;PRKCB;FAS;ICAM1
Adherens junction	5	0.000209237	TJP1;CTNNA1;MAPK1;IQGAP1;FGFR1
MicroRNAs in cancer	9	0.000209237	HDAC4;PRKCB;PRKCE;STAT3;MAPK1;VIM;EZR;NFKB1;CD44
Influenza A	7	0.000209237	PRKCB;MAPK1;FAS;PIK3R1;NFKB1;ICAM1;TNFRSF1A
Pancreatic cancer	5	0.000245485	STAT3;RPS6KB2;MAPK1;PIK3R1;NFKB1
Chronic myeloid leukemia	5	0.000257278	MAPK1;PTPN11;GAB2;PIK3R1;NFKB1
Osteoclast differentiation	6	0.000308746	MAPK1;PIK3R1;FOS;GAB2;NFKB1;TNFRSF1A
Autophagy	6	0.000317296	GABARAPL2;RPS6KB2;MAPK1;PIK3R1;CTSD;CTSB
Natural killer cell mediated cytotoxicity	6	0.00035488	PRKCB;MAPK1;FAS;PTPN11;PIK3R1;ICAM1
Colorectal cancer	5	0.00042808	DCC;RPS6KB2;MAPK1;FOS;PIK3R1
Salmonella infection	5	0.00042808	TJP1;FLNA;MAPK1;FOS;NFKB1
Apelin signaling pathway	6	0.000433415	HDAC4;GABARAPL2;PRKCE;RPS6KB2;MAPK1;CALM2
Measles	6	0.000444364	STAT3;MSN;FAS;PIK3R1;FOS;NFKB1
Neuroactive ligand-receptor interaction	9	0.000448418	GRIA1;GRIN2A;GRM5;GRID2;GRIN3A;GRM7;ADORA2B;GRIN2B;GRIN1
Malaria	4	0.000521067	VCAM1;LRP1;CD81;ICAM1
Phospholipase D signaling pathway	6	0.000622597	GRM5;GRM7;MAPK1;PTPN11;PIK3R1;GAB2
NF-kappa B signaling pathway	5	0.00062638	VCAM1;PRKCB;NFKB1;ICAM1;TNFRSF1A
mTOR signaling pathway	6	0.000699334	PRKCB;RPS6KB2;MAPK1;SLC3A2;PIK3R1;TNFRSF1A
Choline metabolism in cancer	5	0.000738619	PRKCB;RPS6KB2;MAPK1;PIK3R1;FOS
Glucagon signaling pathway	5	0.000875744	CAMK2B;CAMK2D;CAMK2A;PHKB;CALM2
Necroptosis	6	0.000945367	CAMK2B;CAMK2D;CAMK2A;STAT3;FAS;TNFRSF1A
Long-term depression	4	0.00103807	GRIA1;GRID2;PRKCB;MAPK1
Non-small cell lung cancer	4	0.00147467	PRKCB;STAT3;MAPK1;PIK3R1
Human papillomavirus infection	8	0.00169899	DLG2;RPS6KB2;MAPK1;FAS;ISG15;PIK3R1;NFKB1;TNFRSF1A
Adipocytokine signaling pathway	4	0.00170179	STAT3;PTPN11;NFKB1;TNFRSF1A
Oocyte meiosis	5	0.00196388	CAMK2B;CAMK2D;CAMK2A;MAPK1;CALM2
Leishmaniasis	4	0.00216122	PRKCB;MAPK1;FOS;NFKB1
Pertussis	4	0.00235972	MAPK1;FOS;CALM2;NFKB1
Vascular smooth muscle contraction	5	0.00241882	PRKCB;ADORA2B;PRKCE;MAPK1;CALM2
Viral carcinogenesis	6	0.00261758	HDAC4;GSN;STAT3;MAPK1;PIK3R1;NFKB1
Estrogen signaling pathway	5	0.00275669	MAPK1;PIK3R1;FOS;CALM2;CTSD
Insulin signaling pathway	5	0.00275669	RPS6KB2;MAPK1;PHKB;PIK3R1;CALM2
Aldosterone-regulated sodium reabsorption	3	0.00284947	PRKCB;MAPK1;PIK3R1
Signaling pathways regulating pluripotency of stem cells	5	0.00287396	STAT3;MAPK1;PIK3R1;FGFR2;FGFR1
Adrenergic signaling in cardiomyocytes	5	0.00340777	CAMK2B;CAMK2D;CAMK2A;MAPK1;CALM2
Insulin secretion	4	0.00340777	CAMK2B;CAMK2D;PRKCB;CAMK2A
Breast cancer	5	0.00355997	RPS6KB2;MAPK1;PIK3R1;FOS;FGFR1
Human T-cell leukemia virus 1 infection	6	0.00369731	MAPK1;PIK3R1;FOS;NFKB1;ICAM1;TNFRSF1A
Gastric cancer	5	0.00369731	RPS6KB2;CTNNA1;MAPK1;PIK3R1;FGFR2
IL-17 signaling pathway	4	0.00435108	CEBPB;MAPK1;FOS;NFKB1
Type II diabetes mellitus	3	0.00491343	PRKCE;MAPK1;PIK3R1
T cell receptor signaling pathway	4	0.00575175	MAPK1;PIK3R1;FOS;NFKB1
Hepatocellular carcinoma	5	0.00597174	PRKCB;GSTP1;RPS6KB2;MAPK1;PIK3R1
Toll-like receptor signaling pathway	4	0.00626304	MAPK1;PIK3R1;FOS;NFKB1
Parathyroid hormone synthesis, secretion and action	4	0.0066398	PRKCB;MAPK1;FOS;FGFR1
Th17 cell differentiation	4	0.00679925	STAT3;MAPK1;FOS;NFKB1
NOD-like receptor signaling pathway	5	0.00734462	GABARAPL2;MAPK1;ANTXR1;NFKB1;CTSB
Toxoplasmosis	4	0.00810099	STAT3;MAPK1;NFKB1;TNFRSF1A
PI3K-Akt signaling pathway	7	0.00868305	ERBB4;RPS6KB2;MAPK1;PIK3R1;NFKB1;FGFR2;FGFR1
Endometrial cancer	3	0.00868305	CTNNA1;MAPK1;PIK3R1
VEGF signaling pathway	3	0.00902404	PRKCB;MAPK1;PIK3R1
Chemokine signaling pathway	5	0.00921946	PRKCB;STAT3;MAPK1;PIK3R1;NFKB1
Shigellosis	3	0.0116054	MAPK1;CD44;NFKB1
Relaxin signaling pathway	4	0.0125298	MAPK1;PIK3R1;FOS;NFKB1
Epithelial cell signaling in Helicobacter pylori infection	3	0.0127941	TJP1;PTPN11;NFKB1
Fc epsilon RI signaling pathway	3	0.0127941	MAPK1;GAB2;PIK3R1
FoxO signaling pathway	4	0.0128577	GABARAPL2;STAT3;MAPK1;PIK3R1
Renal cell carcinoma	3	0.0130841	MAPK1;PTPN11;PIK3R1
Arrhythmogenic right ventricular cardiomyopathy (ARVC)	3	0.0144525	CDH2;CTNNA1;DMD
Melanoma	3	0.0144525	MAPK1;PIK3R1;FGFR1
Retrograde endocannabinoid signaling	4	0.018379	GRIA1;GRM5;PRKCB;MAPK1
Non-alcoholic fatty liver disease (NAFLD)	4	0.0186427	FAS;PIK3R1;NFKB1;TNFRSF1A
Phagosome	4	0.0197733	TUBB2B;TUBA1A;TUBB2A;TUBA4A
Cushing syndrome	4	0.0209409	CAMK2B;CAMK2D;CAMK2A;MAPK1
Wnt signaling pathway	4	0.0221453	CAMK2B;CAMK2D;PRKCB;CAMK2A
Cellular senescence	4	0.0229053	MAPK1;PIK3R1;CALM2;NFKB1
JAK-STAT signaling pathway	4	0.023678	STAT3;PTPN11;PIK3R1;GFAP
Salivary secretion	3	0.0246958	CST3;PRKCB;CALM2
Th1 and Th2 cell differentiation	3	0.0259691	MAPK1;FOS;NFKB1
Prion diseases	3	0.027466	HSPA5;MAPK1
Amoebiasis	3	0.0285992	PRKCB;PIK3R1;NFKB1
Phosphatidylinositol signaling system	3	0.0307633	PRKCB;PIK3R1;CALM2
Longevity regulating pathway	3	0.0330006	RPS6KB2;PIK3R1;NFKB1
Carbohydrate digestion and absorption	3	0.0409124	PRKCB;PIK3R1
Focal adhesion	4	0.0433602	PRKCB;FLNA;MAPK1;PIK3R1
Thyroid hormone signaling pathway	3	0.0449251	PRKCB;MAPK1;PIK3R1

## Sheet: DISEASE GENE
Gene symbol (AD-associated genes)
A2M
ANK3
ANKS1B
APOE
BCL3
CALM2
CAMK2A
CD44
CDH2
CEBPB
CHL1
CLU
CST3
CTSB
CTSD
DDR1
DMD
DST
EPHA4
ERBB4
FAS
FLNA
FOS
GAB2
GFAP
GRIA1
GRIN1
GRIN2A
GRIN2B
GRIN3A
GRM5
GSN
GSTP1
HDAC4
HSPA5
ICAM1
IFIT3
LRP1
MAP2
MAPK1
MYO6
NFKB1
NRG3
PRDX1
PRDX6
PRKCB
PRKCE
PTBP1
RPS6KB2
S100B
SNCA
SRA1
STAT3
TNFRSF1A
VCAM1
VIM

## Sheet: GPSnet parameter
	top 0.00010	top 0.00020	top 0.00030	top 0.00040	top 0.00050
0	10	12	12	16	227
0.1	5	5	3	3	145
0.2	1	1	1	1	116
0.3	1	1	1	1	1
0.4	1	1	1	1	1
0.5	1	1	1	1	1
0.6	1	1	1	1	1
0.7	1	1	1	1	1
0.8	1	1	1	1	0
0.9	1	1	1	1	0
