# Supplementary material for: Multimodal single-cell/nucleus RNA sequencing data analysis uncovers molecular networks between disease-associated microglia and astrocytes with implications for drug repurposing in Alzheimer's disease
Source: HighWire-hosted journal article supplement (doi:10.1101/gr.272484.120), 2021-02-24
Supplement: Supplemental_Table_S8.zip [file Supplemental_Table_S8.xlsx]

## Sheet: DESCRIPTION
Supplemental Table S8. Disease molecular network results for a human snRNA-seq dataset (GSE138852).
PATHWAY ENRICHMENT	Enrichr/Pathways/KEGG 2019 Human (FDR < 0.05)
DISEASE GENE	Enrichr/Diseases or Drugs/DisGeNET (Alzheimer's Disease, FDR < 0.05)

## Sheet: DEG
Human gene symbol	avg_logFC	p_val_adj	avg_log2FC
SLC1A2	-1.51191	4.13e-254	-2.18122
NRXN1	-1.33709	5.69e-210	-1.92902
GPC5	-1.12895	2.42e-178	-1.62873
MALAT1	0.637558	1.33e-148	0.919802
GFAP	1.4306	6.88e-146	2.06392
GPM6A	-0.786941	2.03e-142	-1.13532
DCLK1	1.92671	8.84e-142	2.77966
LSAMP	-0.565032	6.55e-110	-0.815169
ERBB4	-0.801986	5.34e-108	-1.15702
NEAT1	0.999028	4.78e-106	1.44129
NKAIN3	-1.14718	5.14e-103	-1.65504
SLC38A1	1.74295	9.13e-100	2.51454
LRP1B	-0.695651	2.69e-87	-1.00361
ID3	1.61748	8.1e-87	2.33353
VCAN	1.34322	9.75e-85	1.93786
SLC1A3	-0.782769	9.77e-83	-1.1293
GRM3	-1.55768	2.06e-79	-2.24726
CADM2	-0.787139	9.29e-79	-1.1356
ADGRB3	-0.76758	1.43e-77	-1.10738
LINC00499	-1.34633	1.05e-76	-1.94234
COL5A3	-1.22046	1.49e-72	-1.76075
CADM1	-0.883429	1.82e-71	-1.27452
PLEKHA5	1.21278	1.07e-68	1.74967
CD44	1.34829	2.23e-68	1.94518
ARHGAP24	-1.42546	2.73e-68	-2.05651
DLC1	-1.14389	1.84e-67	-1.65028
RORA	-0.556317	1.42e-63	-0.802596
PCDH9	-0.427387	4.07e-63	-0.616589
RNF219-AS1	-0.832943	1.7e-59	-1.20168
WIF1	-1.42674	5.31e-58	-2.05834
CABLES1	-1.28161	1.1e-56	-1.84898
IDI1	1.51673	2.72e-56	2.18818
XIST	1.06554	2.47e-55	1.53726
TSHZ2	1.12293	3.08e-54	1.62004
DPP10	0.60925	8.04e-53	0.878962
ADGRL3	-0.756658	1.73e-52	-1.09163
GABRB1	-0.837513	4.42e-52	-1.20828
FOS	1.09895	7.27e-52	1.58544
CACNB2	-0.916015	7.11e-50	-1.32153
TNC	1.15273	5.06e-49	1.66304
ARHGEF4	0.728905	6.23e-49	1.05159
APOE	-0.930777	1.96e-48	-1.34283
LINC01094	1.39797	1.86e-47	2.01684
TJP2	1.08353	2.67e-47	1.5632
PREX2	-0.82371	1.02e-46	-1.18836
LINC01411	1.23268	1.19e-45	1.77837
FTH1	-0.807768	1.36e-45	-1.16536
HSPB8	1.13784	5.71e-45	1.64155
GALNT15	1.01858	4.9e-43	1.4695
SGCD	-0.937926	2.22e-41	-1.35314
LINC00836	0.917834	3.29e-41	1.32415
PLCB1	-0.979266	6.37e-41	-1.41278
ESRRG	-0.993207	1.18e-40	-1.43289
LRRC4C	-0.847377	1.92e-40	-1.22251
SLC4A4	-0.879477	3.45e-40	-1.26882
PLCE1	0.921262	3.6e-40	1.3291
RP11-627D16.1	0.940173	1.22e-39	1.35638
LSAMP-AS1	-1.07803	4.3e-39	-1.55527
FLRT2	-1.07291	1.08e-38	-1.54788
IGFBP5	0.992356	7.69e-38	1.43167
LINC00609	0.936667	9.86e-38	1.35133
DGKB	0.98665	1.8e-37	1.42343
LINC01088	0.992036	2.65e-37	1.4312
PTN	-0.878975	1.26e-36	-1.26809
NHSL1	-0.843343	6.04e-36	-1.21669
JUNB	1.06547	8.44e-36	1.53715
H3F3B	1.04468	1.9e-35	1.50715
SMAD9	0.816341	2.29e-35	1.17773
STXBP5L	0.974858	7.56e-35	1.40642
RHPN1	0.882497	1.15e-34	1.27317
LRRC3B	-1.01847	3.22e-34	-1.46934
MIR4300HG	0.951647	8.85e-34	1.37294
MAGI2	-0.485311	1.69e-33	-0.700156
GLUL	-0.754292	3.33e-33	-1.08821
CRYAB	0.901563	3.58e-33	1.30068
COL21A1	0.879619	1.9e-32	1.26902
RBMS3	-0.815063	1.93e-32	-1.17589
DPP6	0.877045	4.67e-32	1.26531
SLC6A1-AS1	-0.913894	1.76e-31	-1.31847
C1orf61	-0.595675	1.81e-31	-0.859377
RP11-317N12.1	-0.973338	1.85e-31	-1.40423
PIK3C2A	-0.898318	1.03e-30	-1.296
SNED1	0.86006	3.39e-30	1.2408
CCDC85A	0.898493	6.9e-30	1.29625
CH17-189H20.1	0.815584	3.64e-29	1.17664
GNA14	-0.848389	3.78e-29	-1.22397
RP11-436D23.1	-0.788135	5.24e-29	-1.13704
PFKFB2	0.875638	6.65e-29	1.26328
MAOB	1.02486	8.77e-29	1.47857
DCLK2	0.641498	2.87e-28	0.925486
PDE4D	-0.624684	3.72e-28	-0.901229
APLNR	0.767997	5.13e-28	1.10799
NR4A1	0.981614	1.82e-27	1.41617
JUN	0.908897	1.89e-27	1.31126
SLCO3A1	0.827662	4.84e-27	1.19406
ZFP36L1	0.712918	1.2e-26	1.02852
EPHA6	-0.86659	1.84e-26	-1.25023
KCNN2	0.780573	2.09e-26	1.12613
KIAA0930	-0.6719	2.44e-26	-0.969347
SLC24A4	0.691513	4.74e-26	0.997642
AC002429.5	-0.794388	5.87e-26	-1.14606
ITGB4	0.658486	9.41e-26	0.949995
GFPT2	0.865887	1.89e-25	1.24921
ELN	0.710168	1.66e-24	1.02456
USH1C	0.659063	2.02e-24	0.950827
PRKG1	0.4449	2.26e-24	0.641855
DNM3	-0.698467	3.48e-24	-1.00767
SYNE1	-0.711238	7.58e-24	-1.0261
TMEM241	-0.865783	7.8e-24	-1.24906
NPAS3	-0.290718	9.64e-24	-0.419418
RFX4	0.560457	1.02e-23	0.808568
CST3	-0.515242	1.06e-23	-0.743337
GOLGB1	0.779266	2.35e-23	1.12424
MAN1C1	0.690108	2.95e-23	0.995615
RIPK2	0.767894	3.68e-23	1.10784
GABRA2	-0.741821	4.25e-23	-1.07022
DAAM2	0.592612	7.07e-23	0.854958
DUSP1	0.916234	9e-23	1.32185
IER2	1.0261	9.01e-23	1.48036
L3MBTL4	0.721222	1.06e-22	1.0405
VAV3	-0.788097	1.09e-22	-1.13698
MAP1B	0.750788	1.11e-22	1.08316
FRMD4A	-0.829708	1.25e-22	-1.19702
GEM	0.920952	3.91e-22	1.32865
ITPKB	0.610052	4.11e-22	0.880119
SYNM	0.640966	6.06e-22	0.924718
RP11-384F7.2	-0.468185	8.01e-22	-0.675448
RNF19A	0.772546	8.22e-22	1.11455
RHOJ	-0.783509	1.01e-21	-1.13037
CDH20	-0.445898	1.55e-21	-0.643294
KCNQ3	-0.805487	1.99e-21	-1.16207
RORB	-0.63647	2.13e-21	-0.918233
IFITM3	0.708744	2.26e-21	1.0225
KNOP1	0.742433	7.19e-21	1.0711
LPAR4	0.663469	8.11e-21	0.957183
GNA14-AS1	-0.814969	8.66e-21	-1.17575
MATN2	0.625504	9.61e-21	0.902411
GLI3	-0.73695	1e-20	-1.06319
KAZN	0.764913	1.02e-20	1.10354
TUBB2B	-0.738926	2.51e-20	-1.06604
NAV1	0.666305	2.97e-20	0.961275
PAMR1	-0.681858	4.7e-20	-0.983713
PDE4DIP	0.470087	7.55e-20	0.678192
NR2F2-AS1	-0.70854	7.7e-20	-1.02221
WDR49	0.63044	1.13e-19	0.909533
UBC	0.681131	1.73e-19	0.982664
FUT9	-0.543384	2.11e-19	-0.783937
SORBS1	0.407149	2.17e-19	0.587392
BRINP3	-0.746755	3.98e-19	-1.07734
LGI4	-0.699737	4.82e-19	-1.00951
SLC16A9	0.691655	6.23e-19	0.997847
TMEM132C	-0.740338	1.06e-18	-1.06808
KCNJ3	0.642252	1.29e-18	0.926573
BICD1	0.628174	2.51e-18	0.906264
ID2	0.768244	3.04e-18	1.10834
CERS6	0.686535	3.82e-18	0.990461
TNIK	-0.381087	4.91e-18	-0.549792
FTL	-0.530062	5.84e-18	-0.764718
SLC7A2	0.661579	5.96e-18	0.954456
FAM171B	-0.692886	9.8e-18	-0.999623
NR4A2	0.797107	1.17e-17	1.14998
RP11-3B12.2	-0.814203	1.78e-17	-1.17465
SERPINI2	0.558255	2.13e-17	0.805392
TENM2	-0.52195	2.36e-17	-0.753015
C1orf168	0.610393	3.11e-17	0.880611
ATP9A	0.677491	3.19e-17	0.977412
GADD45B	0.756832	3.65e-17	1.09188
C3	0.628023	4.12e-17	0.906045
TPD52L1	-0.51513	4.2e-17	-0.743176
DBI	0.689685	7.52e-17	0.995005
AEBP1	0.664002	7.57e-17	0.957953
GUCY1A3	0.682028	8.96e-17	0.983959
TPST1	0.666052	1.24e-16	0.96091
GLUD1	-0.530301	1.28e-16	-0.765062
NDRG2	-0.503208	1.74e-16	-0.725976
RP11-39M21.1	-0.708801	2.28e-16	-1.02258
GRIA2	-0.624364	2.89e-16	-0.900766
ADAMTS9-AS2	0.648799	2.95e-16	0.93602
MT2A	0.504399	3.27e-16	0.727693
HLA-E	0.865528	3.27e-16	1.24869
GNAQ	-0.539291	4.36e-16	-0.778032
SLCO1C1	-0.662978	8.85e-16	-0.956475
ANXA1	0.477289	1.39e-15	0.688582
RYR3	-0.425068	1.45e-15	-0.613243
PTPRZ1	-0.488206	1.53e-15	-0.704332
LRRC16A	-0.486558	1.6e-15	-0.701955
FAM189A2	0.56112	1.68e-15	0.809524
ADAMTSL3	0.691352	1.77e-15	0.99741
MGAT4C	-0.477774	1.88e-15	-0.689283
SEMA3B	0.60225	2.28e-15	0.868863
MGST1	-0.559928	2.85e-15	-0.807806
WWOX	0.309777	2.92e-15	0.446914
ARMC3	0.541651	4e-15	0.781437
S100A6	0.70311	4.3e-15	1.01437
GMPR	0.645303	6.06e-15	0.930975
GRIK4	0.609114	6.26e-15	0.878765
CCDC14	0.655963	8.63e-15	0.946354
ZBTB20	-0.311163	9.27e-15	-0.448913
CTD-2282P23.2	-0.682672	9.74e-15	-0.984888
SLC35F1	-0.680178	1.05e-14	-0.98129
AHI1	0.517974	1.07e-14	0.747278
CKB	-0.491333	1.39e-14	-0.708844
TOB1	0.626207	1.46e-14	0.903426
BCL6	0.523224	3.37e-14	0.754852
ST6GAL1	0.607696	3.42e-14	0.87672
ADGRV1	-0.290692	4.05e-14	-0.41938
LINC00299	-0.623077	4.29e-14	-0.89891
TTYH1	-0.536358	5.17e-14	-0.773801
GARNL3	-0.616774	7.1e-14	-0.889816
GJA1	-0.645718	7.77e-14	-0.931575
LMO3	-0.583558	1.04e-13	-0.841897
GPC6	0.638984	1.11e-13	0.921858
PHLPP1	-0.500881	1.18e-13	-0.722618
RP11-275H4.1	-0.656938	1.25e-13	-0.947761
LRAT	0.463324	1.52e-13	0.668436
CHD9	-0.506536	1.81e-13	-0.730776
CPE	-0.418011	2.35e-13	-0.603062
NLGN4X	-0.621574	2.67e-13	-0.896741
NAV2	0.412299	2.92e-13	0.594821
FBXL7	-0.414383	3e-13	-0.597828
ENOX1	-0.67918	3.41e-13	-0.979849
ATP1B3	0.600777	3.52e-13	0.866737
PTGDS	-0.469446	3.73e-13	-0.677268
POU6F2	-0.612383	4.37e-13	-0.883481
2021-03-03	0.648845	4.59e-13	0.936085
AHNAK	0.588959	4.65e-13	0.849688
ADAMTS9	0.620947	7.43e-13	0.895838
EDNRB	-0.675863	8.48e-13	-0.975064
EPHB1	-0.583104	9.8e-13	-0.841241
PER1	0.635676	1.05e-12	0.917086
ABCC4	0.503155	1.16e-12	0.725899
SLC39A11	0.507082	1.43e-12	0.731565
RP11-739G5.1	0.604798	1.53e-12	0.872539
OPHN1	-0.45198	1.7e-12	-0.65207
HIF3A	0.421745	2.56e-12	0.60845
ZFP36	0.652818	2.59e-12	0.941817
CTC-498M16.4	-0.577295	2.73e-12	-0.832861
RERG	-0.650439	3.47e-12	-0.938385
MAN1A1	0.514605	3.67e-12	0.742419
ID1	0.607954	4.81e-12	0.877092
CFAP47	0.548532	5.19e-12	0.791364
NTM	-0.226798	5.8e-12	-0.3272
MFGE8	-0.6554	1.03e-11	-0.945542
STXBP5	-0.535639	1.36e-11	-0.772764
NFIB	-0.447474	1.39e-11	-0.645568
CELF2	-0.414399	1.68e-11	-0.597852
SLC20A2	0.546887	1.83e-11	0.788991
GRIN2C	-0.661948	2.28e-11	-0.954989
DDAH1	-0.569246	2.74e-11	-0.821249
CDH10	-0.648851	3.15e-11	-0.936093
BAMBI	0.532935	3.61e-11	0.768863
AC005009.2	-0.405555	3.7e-11	-0.585092
CP	0.482969	4.47e-11	0.696776
PLEC	0.514891	4.73e-11	0.74283
ZFAND5	0.60809	4.79e-11	0.877288
RP11-444D3.1	-0.480899	4.8e-11	-0.69379
ABR	0.50707	5.36e-11	0.731547
GRIA1	0.574639	5.83e-11	0.829029
MTCH1	0.513747	8.18e-11	0.74118
AQP4-AS1	0.519102	8.47e-11	0.748906
FAT3	-0.523235	8.47e-11	-0.754868
RGS6	0.605614	8.77e-11	0.873717
ATP1B2	-0.539721	1.08e-10	-0.778653
LRP4	-0.416281	1.21e-10	-0.600567
AP1S2	0.55441	1.41e-10	0.799844
CTNND2	-0.222804	1.43e-10	-0.321439
HES5	-0.627524	1.72e-10	-0.905326
HTRA1	-0.587709	2.37e-10	-0.847885
SLC8A1	-0.63863	2.8e-10	-0.921349
ARHGEF3	0.553554	2.85e-10	0.798609
SLC7A10	-0.489709	2.95e-10	-0.7065
UTY	-0.501994	3.21e-10	-0.724224
ANGPT1	0.554829	3.46e-10	0.80045
UGP2	-0.583322	3.93e-10	-0.841556
PPFIA1	0.504518	4.07e-10	0.727866
LDLR	0.434371	5.01e-10	0.626665
RP11-390P2.4	-0.514665	5.92e-10	-0.742504
RP11-77K12.4	0.508479	6.02e-10	0.733581
RGS20	-0.561437	6.33e-10	-0.809983
CTC-490E21.12	0.472923	6.79e-10	0.682284
MT1M	0.610064	7.08e-10	0.880136
BTG2	0.603454	7.42e-10	0.870601
MAST4	-0.44599	1.11e-09	-0.643428
OSGIN2	0.520944	1.2e-09	0.751563
ARRDC4	0.439107	1.38e-09	0.633498
SNCG	-0.54792	1.63e-09	-0.790482
MT1E	0.483786	1.65e-09	0.697956
CEP85L	-0.526512	1.73e-09	-0.759596
ATP2C1	-0.553592	1.76e-09	-0.798665
KLF12	-0.508953	1.78e-09	-0.734264
MERTK	-0.558769	1.85e-09	-0.806134
VWA3B	0.558553	2e-09	0.805822
GJB6	-0.550876	2.27e-09	-0.794746
SPRED1	-0.572596	2.38e-09	-0.826081
ALCAM	-0.55362	2.48e-09	-0.798704
RASD1	0.588346	2.63e-09	0.848803
SH3GL2	0.465037	2.66e-09	0.670907
SYTL4	0.479046	4.81e-09	0.691117
RASL10A	-0.468724	5.84e-09	-0.676226
ETNPPL	-0.44039	7.03e-09	-0.635348
HOPX	-0.541119	7.74e-09	-0.78067
ARHGAP6	0.414706	8.42e-09	0.598294
TOX	-0.517219	8.63e-09	-0.746189
TMEM108	-0.539758	8.7e-09	-0.778707
HILPDA	0.553275	9.53e-09	0.798207
FMNL2	-0.337369	1.22e-08	-0.486721
AQP4	0.336686	1.36e-08	0.485736
NTRK2	-0.251786	1.63e-08	-0.36325
ZFHX4	-0.51455	1.75e-08	-0.742339
TRPM3	-0.319674	2.08e-08	-0.461192
SPTAN1	0.466883	2.16e-08	0.67357
RP11-307B6.3	-0.540297	2.18e-08	-0.779483
F11-AS1	-0.565044	2.22e-08	-0.815187
FRMPD2	0.513033	2.56e-08	0.74015
VWA3A	0.512438	2.68e-08	0.739292
NLGN4Y	-0.508801	2.78e-08	-0.734045
MT-CO3	-0.701336	3.35e-08	-1.01181
SPON1	-0.447315	3.59e-08	-0.645339
NHS	0.509515	3.68e-08	0.735075
GPHN	-0.373535	3.92e-08	-0.538897
RGS7	-0.454008	5.23e-08	-0.654995
PRKAG2	0.510624	5.82e-08	0.736674
ADAMTS17	-0.547734	6.63e-08	-0.790213
AC007563.5	0.387829	7.21e-08	0.559518
BSG	-0.56702	7.28e-08	-0.818037
RP11-248J23.7	-0.544262	8.6e-08	-0.785204
SLC14A1	0.420907	8.82e-08	0.607241
LIMCH1	-0.478931	9.13e-08	-0.690951
PDE3B	-0.556706	9.39e-08	-0.803157
ECE1	0.482047	9.77e-08	0.695446
ASPH	-0.453654	1.1e-07	-0.654484
OSBPL6	-0.548158	1.11e-07	-0.790824
SELENBP1	-0.443685	1.13e-07	-0.640103
DLG2	-0.357443	1.3e-07	-0.515681
VEGFA	-0.565052	1.33e-07	-0.815198
ENTPD1	-0.487716	1.51e-07	-0.703625
PFKFB3	0.420789	1.63e-07	0.607071
NFAT5	-0.43035	1.79e-07	-0.620864
SH3RF1	-0.499243	1.81e-07	-0.720256
GPD2	-0.512586	2.25e-07	-0.739506
CAMK1D	0.481029	2.4e-07	0.693978
PCDH17	-0.555386	2.41e-07	-0.801252
LDB2	0.420069	2.46e-07	0.606032
GLIS3	0.347406	2.88e-07	0.5012
DPYSL3	0.485254	3.08e-07	0.700073
HPSE2	-0.74537	3.31e-07	-1.07534
SFMBT2	-0.478287	3.32e-07	-0.690023
SOX5	-0.358075	3.5e-07	-0.516593
MT-ND3	-0.874432	3.67e-07	-1.26154
P2RY14	-0.536985	3.9e-07	-0.774706
CFAP54	0.462001	4.55e-07	0.666526
CYCS	0.521838	5.55e-07	0.752853
PBX1	-0.407781	5.64e-07	-0.588304
RP11-266O8.1	0.479221	6.09e-07	0.691369
EGLN3	-0.513874	6.32e-07	-0.741363
CSGALNACT1	-0.355024	6.52e-07	-0.512191
SLC38A2	0.491358	6.6e-07	0.70888
PRMT9	0.517062	6.6e-07	0.745962
OLFM2	-0.476111	7.03e-07	-0.686883
LMNTD1	0.510076	7.72e-07	0.735883
TXNIP	0.573238	7.73e-07	0.827008
MYO5C	0.416004	7.89e-07	0.600167
CLIP2	0.459493	7.99e-07	0.662908
CD47	-0.518477	8.38e-07	-0.748004
NFKBIA	0.4671	9.22e-07	0.673883
PCLO	0.396369	9.41e-07	0.57184
GATSL3	-0.439911	9.88e-07	-0.634658
FBXO32	0.493249	1.04e-06	0.711608
SRPX	0.408311	1.06e-06	0.589068
RP11-116O11.1	-0.477903	1.07e-06	-0.689468
NLRP1	0.459081	1.11e-06	0.662314
MPHOSPH9	0.402493	1.15e-06	0.580675
HS3ST5	-0.480956	1.16e-06	-0.693873
GRID1	-0.492459	1.22e-06	-0.710468
FRMPD3	0.365885	1.29e-06	0.527861
2021-09-07	-0.427055	1.38e-06	-0.616109
ATP8A1	-0.488087	1.4e-06	-0.70416
ADGRB1	-0.501741	1.47e-06	-0.72386
RP4-678D15.1	0.273647	1.81e-06	0.39479
BNC2	0.454814	1.89e-06	0.656159
ENSA	0.462711	1.96e-06	0.667551
PHYHD1	0.456424	2.12e-06	0.65848
GPAM	-0.499635	2.3e-06	-0.720821
IZUMO4	-0.535298	2.53e-06	-0.772271
OAF	-0.470471	2.68e-06	-0.678746
APC	-0.361139	2.76e-06	-0.521013
OSBPL3	0.421313	2.9e-06	0.607826
B2M	0.451977	3.32e-06	0.652065
CASK	0.470509	3.36e-06	0.678801
CLDN10	-0.495596	3.5e-06	-0.714994
ATL2	-0.476443	3.7e-06	-0.687362
DNAJC1	0.440894	3.78e-06	0.636076
SPARC	0.481746	3.81e-06	0.695013
USP9Y	-0.455798	3.93e-06	-0.657577
GAN	0.416373	4e-06	0.6007
MIR9-3HG	0.318428	4.07e-06	0.459394
TCF4	-0.320359	4.22e-06	-0.462181
MEF2C-AS1	-0.50749	4.7e-06	-0.732154
SFXN5	-0.33763	5.7e-06	-0.487097
CRIP2	0.385645	6.04e-06	0.556368
SEL1L3	-0.342939	6.26e-06	-0.494756
TRPS1	-0.330201	6.34e-06	-0.476379
DNAH7	-0.461965	6.46e-06	-0.666475
RTN1	0.41797	6.91e-06	0.603003
SLC24A3	-0.486255	6.97e-06	-0.701518
ADCY8	0.394018	7.22e-06	0.568448
NOL4	-0.484883	7.74e-06	-0.699538
JUND	0.439884	8.25e-06	0.634618
CCL2	0.462316	8.26e-06	0.666982
RP11-563J2.2	0.460876	8.91e-06	0.664904
NRP2	-0.296043	9.32e-06	-0.427099
LINC00982	-0.475617	1.18e-05	-0.68617
TSPAN7	-0.46937	1.19e-05	-0.677158
SLC8A3	0.319843	1.2e-05	0.461436
SPARCL1	-0.249119	1.24e-05	-0.359403
GYG2	0.423123	1.27e-05	0.610438
AC016716.2	-0.427977	1.34e-05	-0.617441
LRIG1	0.351473	1.36e-05	0.507068
CCBE1	-0.436924	1.41e-05	-0.630349
DIO2	-0.444323	1.46e-05	-0.641022
ANGPTL4	0.495395	1.48e-05	0.714704
SLC1A4	-0.4979	1.71e-05	-0.718318
ANKRD36C	0.420961	1.82e-05	0.607318
FRY	0.453672	1.83e-05	0.65451
RP11-759A24.3	-0.308029	1.84e-05	-0.444392
MYO10	-0.477712	1.9e-05	-0.689193
ARHGAP5	-0.361664	2.06e-05	-0.521772
CPEB3	-0.412413	2.17e-05	-0.594987
PCDH9-AS2	-0.43544	2.36e-05	-0.628207
PAQR8	-0.484924	2.51e-05	-0.699598
PID1	-0.457973	2.74e-05	-0.660716
RUBCN	0.382421	2.83e-05	0.551718
GRAMD1C	-0.422256	2.86e-05	-0.609187
SASH1	-0.373245	3e-05	-0.538479
FKBP5	0.455792	3.11e-05	0.657568
MAML3	0.348307	3.15e-05	0.5025
GALNT2	-0.438723	3.25e-05	-0.632943
NFIA	-0.2654	3.3e-05	-0.382892
MIAT	-0.416188	3.37e-05	-0.600432
RLBP1	-0.40588	3.38e-05	-0.585561
PRR16	0.327169	3.82e-05	0.472006
HS6ST3	0.445322	3.83e-05	0.642463
AC074363.1	-0.381148	3.9e-05	-0.549881
RGS9	0.44522	4.11e-05	0.642316
CPSF4	0.354025	4.38e-05	0.51075
EFEMP1	-0.383609	4.7e-05	-0.55343
SERPINE2	-0.454281	4.89e-05	-0.65539
S100B	0.401448	5.01e-05	0.579168
MAPT	0.407235	5.02e-05	0.587515
SPAG1	0.456018	5.27e-05	0.657895
INTU	-0.387609	5.69e-05	-0.559201
BAIAP3	0.448312	5.8e-05	0.646777
LINC00461	-0.338661	5.87e-05	-0.488585
SYAP1	0.369809	6.11e-05	0.533521
ADCY2	0.246978	6.32e-05	0.356313
LGR4	-0.438078	6.55e-05	-0.632012
PRRX1	0.417553	6.74e-05	0.602402
AGFG2	0.395546	7.26e-05	0.570653
CTD-2341M24.1	-0.455923	7.49e-05	-0.657757
ACSBG1	-0.349084	7.72e-05	-0.503622
DCUN1D1	-0.457573	7.84e-05	-0.660138
AKAP7	-0.415782	7.86e-05	-0.599846
C10orf107	0.311625	8.22e-05	0.44958
B3GAT2	0.476531	8.48e-05	0.687489
LRRTM4	0.447777	8.73e-05	0.646006
RP11-431M3.2	-0.372054	8.78e-05	-0.536761
MT-ND4	-0.564503	8.9e-05	-0.814406
AC092684.1	0.400387	9.16e-05	0.577637
ANTXR1	0.453759	9.36e-05	0.654636
MAP3K14	0.390229	0.000109568	0.562981
S100A1	-0.314904	0.0001204	-0.45431
SEMA5A	0.443564	0.000122595	0.639928
C2orf72	-0.449598	0.000128134	-0.648633
GABRA4	-0.353314	0.000128473	-0.509724
ABCD2	-0.406861	0.000128755	-0.586976
EYA1	-0.457366	0.000129896	-0.659839
AP000304.12	-0.40361	0.00013121	-0.582286
FAM155A	-0.284089	0.000133399	-0.409854
RP11-43D2.2	-0.350799	0.000139515	-0.506096
RP11-507B12.2	0.528725	0.000145782	0.762789
NT5E	-0.36719	0.000155565	-0.529743
ALPK1	0.371254	0.000156181	0.535607
RP11-259K15.2	0.410309	0.000156762	0.59195
FAM19A1	-0.484037	0.000168918	-0.698318
AZIN1	0.418913	0.000170597	0.604364
SAT1	-0.241462	0.000177997	-0.348356
TTTY14	-0.405184	0.000181587	-0.584557
TSPAN6	0.289665	0.000187274	0.417899
SRPX2	0.354776	0.000188991	0.511834
ITM2C	-0.391676	0.000189398	-0.565069
PTPRE	0.3207	0.000189627	0.462672
ADIRF	0.406602	0.000199958	0.586602
BCL2	-0.38435	0.000201535	-0.5545
NMT1	0.422735	0.00022316	0.609877
DCXR	-0.376494	0.000225661	-0.543166
EEF1A1	0.400103	0.000226077	0.577227
CEBPD	0.463973	0.000227109	0.669371
RP11-514P8.6	0.374648	0.000233265	0.540503
CRISPLD1	0.350479	0.000233842	0.505635
COX20	-0.454043	0.000239912	-0.655045
SMARCA2	-0.408269	0.0002587	-0.589007
RFX3-AS1	0.368267	0.000279336	0.531298
FAM179A	0.431316	0.000344063	0.622257
RANBP3L	-0.335621	0.000373338	-0.484199
RP4-613B23.1	0.459004	0.000394141	0.662202
FABP5	0.466435	0.00043162	0.672923
AP000487.6	0.394722	0.000431998	0.569463
ACADVL	-0.373214	0.000434748	-0.538434
FBXO2	0.393887	0.000451199	0.568259
PCDH7	-0.38067	0.000463544	-0.54919
PLAGL1	-0.402799	0.000467106	-0.581116
AUTS2	-0.276718	0.000508903	-0.39922
SYNPO2	0.383581	0.000554414	0.55339
C1orf21	-0.393012	0.000571426	-0.566997
CTSH	0.407247	0.000575966	0.587534
NCKAP5	-0.313738	0.000594057	-0.452628
ARHGEF17	0.369896	0.000624038	0.533647
RGR	0.434286	0.000662401	0.626543
MT-CO2	-0.574967	0.000664537	-0.829503
CYP2J2	-0.377445	0.000674515	-0.544538
PLD5	-0.411994	0.000676993	-0.594381
SLC6A1	-0.440291	0.00072331	-0.635206
MEGF10	-0.40515	0.000755841	-0.584508
LINC00500	-0.359887	0.000761825	-0.519207
LRRC7	-0.438517	0.00077318	-0.632646
KLHL32	-0.403015	0.000825318	-0.581427
IFFO2	0.359052	0.000916578	0.518003
SHROOM3	-0.382062	0.00103274	-0.551198
AKAP12	-0.423644	0.00105763	-0.611189
MAP1LC3B2	0.282542	0.0010717	0.407622
SMURF2	-0.385601	0.00114386	-0.556304
C8orf34	0.402302	0.00121187	0.580399
OSBPL11	0.398421	0.00122891	0.5748
RP11-849I19.1	-0.392531	0.00124397	-0.566303
NRCAM	-0.240407	0.0012972	-0.346835
GPR37L1	-0.442073	0.00130817	-0.637777
AC074391.1	-0.438865	0.00133438	-0.633148
PHKA1	-0.415199	0.00135333	-0.599005
XYLT1	-0.408846	0.00156263	-0.58984
SPG20-AS1	0.399898	0.00160128	0.576931
ABI1	-0.382601	0.00160159	-0.551977
SGIP1	-0.365591	0.00170861	-0.527436
ARHGEF12	-0.349246	0.00171463	-0.503855
GAREM2	-0.339651	0.00172525	-0.490013
PLCD3	0.302521	0.00182234	0.436446
SCG2	0.479938	0.0018246	0.692404
CHRDL1	-0.335726	0.00186929	-0.484351
PLPP3	-0.309438	0.00191458	-0.446424
C2CD2	0.323589	0.00204488	0.466841
PI16	0.348965	0.00204611	0.50345
TRDN	0.433862	0.0021467	0.625931
CTNNA2	-0.222522	0.00219118	-0.321032
LUC7L3	0.29948	0.0022262	0.432058
STAT3	0.368065	0.00226299	0.531006
ACSL3	-0.404632	0.0022868	-0.58376
CHST11	-0.403573	0.00236811	-0.582233
RSRP1	-0.358665	0.00239371	-0.517444
SLC16A1-AS1	0.364347	0.002504	0.525641
ARHGAP39	0.264364	0.00251689	0.381396
COBLL1	0.214489	0.00265285	0.309442
UBA6-AS1	-0.417393	0.00268321	-0.60217
PTCHD1-AS	-0.360239	0.00271813	-0.519716
ZNF462	-0.398855	0.00303811	-0.575426
EMP3	0.338751	0.00305249	0.488715
RFTN1	0.245044	0.00318024	0.353524
PIGC	-0.375744	0.00322087	-0.542084
EFNA5	-0.410843	0.00335721	-0.592721
CFAP44	0.315201	0.0033615	0.454739
SLC30A10	-0.41513	0.00337527	-0.598907
IQCA1	-0.363011	0.00351182	-0.523714
BMPR1A	0.272838	0.00366508	0.393622
SEMA6D	0.37409	0.00370395	0.539697
S100A10	0.245257	0.00378321	0.353832
PADI2	0.372744	0.00402803	0.537756
SEMA4A	-0.300249	0.004035	-0.433168
ACTN2	0.269326	0.00416548	0.388555
PRKX	0.327564	0.00420463	0.472575
MLLT3	-0.378105	0.00431546	-0.545491
GALNT18	-0.415478	0.00437026	-0.599408
CSDC2	-0.332849	0.00441478	-0.4802
HMGB1	-0.316801	0.00441893	-0.457047
RASSF4	0.327236	0.00462659	0.472102
RGCC	-0.400975	0.00482978	-0.578484
EPB41L2	-0.380276	0.00485045	-0.548622
CSPG5	-0.404156	0.00498134	-0.583074
RALGAPA2	-0.397824	0.00500972	-0.573939
SERGEF	0.34695	0.00502947	0.500542
NKAIN4	-0.425282	0.00519076	-0.613553
MIR181A2HG	-0.324187	0.00523723	-0.467703
TRIM22	0.258622	0.00539435	0.373113
SESN3	-0.330503	0.00540172	-0.476815
CCBL1	0.33807	0.00561565	0.487732
CPEB4	-0.3682	0.00581724	-0.5312
PDK3	0.337206	0.00595217	0.486485
TPT1-AS1	0.350005	0.00601551	0.504951
LRP4-AS1	-0.377966	0.00602587	-0.54529
LINC00903	-0.347148	0.00613323	-0.500829
ITGA7	-0.414438	0.00629931	-0.597908
HMGCS1	0.470473	0.00724776	0.67875
FGFR3	-0.282028	0.00728666	-0.40688
LRSAM1	0.355614	0.00751554	0.513042
FAM196B	0.221751	0.00782458	0.319919
ETV1	-0.400419	0.00782928	-0.577682
DMD	-0.350437	0.00784414	-0.505574
TCF7L2	-0.288512	0.00806167	-0.416234
RAB34	-0.328679	0.00809052	-0.474184
WDR17	-0.380722	0.00811815	-0.549265
GPI	0.345931	0.00815401	0.499073
NFASC	0.340013	0.00834035	0.490535
FAM49A	-0.410302	0.00853464	-0.591941
CAB39L	0.351604	0.00856674	0.507258
AL592183.1	-0.334394	0.00857901	-0.482429
AP000462.2	-0.329483	0.00897207	-0.475344
LUZP2	-0.509955	0.00912436	-0.735709
LINC01301	-0.346324	0.00917474	-0.49964
LINC00844	0.377849	0.00963813	0.545121
ROBO1	-0.371117	0.0103052	-0.535409
MCF2L2	-0.40555	0.0103575	-0.585085
BOC	0.253344	0.0107931	0.365498
FOSL2	0.276376	0.0112445	0.398726
XKR6	-0.420974	0.0116242	-0.607337
CTC-498M16.2	-0.379534	0.0117817	-0.547552
ENTPD1-AS1	-0.373665	0.0121327	-0.539085
RP13-143G15.4	-0.374875	0.0122573	-0.540831
ATP13A3	0.355136	0.0124992	0.512353
MT-ND2	-0.56305	0.0130856	-0.812309
F3	-0.365584	0.0131112	-0.527426
LCAT	0.383944	0.0133515	0.553914
ACO2	0.398652	0.0133737	0.575133
C2orf82	0.355527	0.0143472	0.512917
BCYRN1	-0.589444	0.0149052	-0.850388
HSPB1	0.224229	0.0153225	0.323494
UFD1L	0.236784	0.0156019	0.341608
ARID5B	0.376059	0.015957	0.542538
IDH2	-0.368862	0.0162841	-0.532156
PTPN13	-0.329091	0.0173283	-0.474778
SMC5-AS1	0.262792	0.0174781	0.379128
PRTG	0.32929	0.0178328	0.475065
IGFBP7	0.38891	0.0179726	0.561078
SPRED2	-0.35977	0.0183915	-0.519039
ZZEF1	0.340605	0.0186444	0.49139
SHFM1	-0.398601	0.0187654	-0.575059
USP2	0.305588	0.0194615	0.440871
MSLN	0.205619	0.0200211	0.296646
PHYHIPL	0.318596	0.0200642	0.459637
MED13L	0.273565	0.0202677	0.394671
MFF	-0.316059	0.0205736	-0.455976
MT-CO1	-0.462646	0.021171	-0.667457
ELOVL2	-0.352568	0.0212145	-0.508649
PSMA1	-0.29299	0.0215228	-0.422695
ARHGAP26	0.266805	0.021705	0.384918
RP11-597D13.9	-0.373721	0.0226709	-0.539165
RP11-120J1.1	-0.344013	0.0233779	-0.496306
ARIH1	0.284448	0.024911	0.410371
RTN4	-0.319694	0.0252981	-0.461221
PDGFRB	-0.359015	0.0259133	-0.517949
TENM4	0.267327	0.0268377	0.385671
TESC	0.288441	0.0270033	0.416132
BAZ2B	-0.317394	0.0289678	-0.457903
METTL7A	-0.402196	0.0295113	-0.580246
AHCYL1	0.259266	0.0302514	0.374042
HSPA5	0.420509	0.0304253	0.606666
PPP2R2C	-0.354513	0.0305381	-0.511454
ZNF331	0.446699	0.0337826	0.644451
ROBO2	0.381718	0.0346501	0.550703
MT3	-0.291704	0.0381119	-0.420841
AC016723.4	-0.320969	0.038119	-0.46306
TTLL9	0.317667	0.0387786	0.458297
RP11-318K12.2	-0.306599	0.0395387	-0.442329
APOC1	-0.358775	0.0403699	-0.517602
ITGA2	0.263417	0.0404669	0.38003
MIR2052HG	-0.348007	0.0408172	-0.502069
CXCL14	-0.366677	0.0408282	-0.529003
EPHX1	-0.386196	0.0411589	-0.557162
SRSF6	-0.333798	0.0412388	-0.481569
MTHFD1L	0.354535	0.0416885	0.511485
CLTCL1	0.33752	0.0419572	0.486938
LINC00623	0.173257	0.042312	0.249957
FRMD6	0.340873	0.0430048	0.491776
C1orf198	0.337713	0.0435615	0.487216
WNK2	0.349508	0.0437603	0.504233
SLC25A5	-0.33886	0.0445173	-0.488872
NOVA1	-0.340401	0.0445369	-0.491094
LPAR1	-0.31527	0.0454059	-0.454839
PRPSAP1	0.321554	0.0456821	0.463904
FXYD1	-0.355365	0.0464921	-0.512684
GNAO1	-0.346009	0.0475228	-0.499185
PPP1R12B	0.298608	0.0481023	0.430801
RANBP17	-0.354199	0.0491545	-0.511001
CD99	0.318009	0.0500174	0.45879
DCHS2	-0.342614	0.0501151	-0.494288
PPP2CB	0.228835	0.0502521	0.330139
COL11A1	-0.370708	0.0512985	-0.534819
MFHAS1	0.335438	0.0513031	0.483934
RP11-197K3.1	-0.378309	0.0515644	-0.545784
SYCP3	-0.247129	0.0525999	-0.356531
NRP1	-0.355934	0.0532108	-0.513505
RAPH1	-0.354094	0.0539765	-0.510849
CAPS	0.348754	0.0540024	0.503145
NAT8L	-0.375597	0.0549225	-0.541872
PDE7B	-0.319029	0.0560403	-0.460262
RP11-371F15.3	0.286292	0.0570682	0.413031
CXorf36	0.19743	0.0616523	0.284831
SEMA3D	0.235546	0.0625599	0.339821
KLF6	0.282663	0.0628292	0.407797
CCSER1	-0.401631	0.0642817	-0.579431
DSCAML1	0.327265	0.0670774	0.472143
RGS2	0.22949	0.0671021	0.331084
IPO9-AS1	0.342488	0.0683484	0.494106
TCF25	0.373973	0.0683661	0.539529
PTAR1	-0.373978	0.0736939	-0.539536
BMPR1B	-0.274787	0.0743579	-0.396434
RBMS3-AS3	-0.287688	0.0745243	-0.415047
RASA3	0.338926	0.0764824	0.488967
MEIS2	-0.291794	0.0787834	-0.42097
GRINA	-0.31459	0.0792976	-0.453857
RP11-32K4.1	-0.377385	0.0798108	-0.544451
DYNC1LI2	0.310482	0.0809663	0.447931
SQSTM1	0.335726	0.0816472	0.48435
CWC25	0.30422	0.0846544	0.438897
RPL23A	-0.187569	0.0861716	-0.270605
PPP1R9A	-0.294257	0.086598	-0.424523
ZFYVE21	-0.360207	0.0878651	-0.51967
CALN1	-0.309083	0.0881056	-0.445913
ENHO	-0.366592	0.0892047	-0.528881
SH3PXD2B	0.253926	0.0917164	0.366338
RP11-290O12.2	0.266714	0.0927812	0.384787
LAMP5	-0.145231	0.0937548	-0.209524
SIK2	0.306148	0.0950546	0.441678
FAM157C	0.274457	0.0954543	0.395958
RNF43	-0.254362	0.0993003	-0.366967
AHCYL2	0.232591	0.0999861	0.335558
DGKD	0.318474	0.100525	0.459461
PFKP	0.282172	0.108624	0.407088
CCDC175	0.172563	0.112092	0.248956
BAZ1B	0.311608	0.113061	0.449556
RP11-463D19.1	-0.202388	0.113995	-0.291983
RILPL1	0.289723	0.115685	0.417983
TTLL5	0.343146	0.116153	0.495055
YOD1	0.316378	0.119439	0.456437
SORCS2	-0.396749	0.121545	-0.572388
ZSCAN31	-0.18448	0.123079	-0.266149
UPF2	0.24433	0.123313	0.352493
FAM204A	-0.328032	0.126207	-0.47325
GRAMD1B	-0.326996	0.129904	-0.471756
PDK4	0.279475	0.132519	0.403197
KCNE4	0.412016	0.133736	0.594414
FAIM2	-0.330233	0.140117	-0.476425
APC2	0.272706	0.140394	0.393432
ZNF589	0.268837	0.145943	0.38785
PTPRG	-0.3092	0.146055	-0.446081
YBX3	0.263548	0.147303	0.380219
TPPP3	0.321547	0.147712	0.463894
ERCC8	-0.27363	0.147864	-0.394764
KIAA1217	0.35809	0.148227	0.516615
JAZF1	-0.348281	0.148444	-0.502463
INSIG1	0.367637	0.148558	0.530388
RP1-84O15.2	-0.33876	0.148751	-0.488727
ACSS1	-0.273329	0.148963	-0.394331
MT-CYB	-0.560253	0.148976	-0.808274
LINGO1	-0.0568093	0.151275	-0.0819585
HES1	0.424343	0.152622	0.612198
RFNG	-0.362922	0.156267	-0.523586
KIAA0226L	-0.270615	0.156382	-0.390415
ZEB1	-0.220681	0.162344	-0.318375
DAP3	0.28956	0.162422	0.417747
SDC2	-0.322718	0.165986	-0.465584
CRB2	0.312796	0.170825	0.451269
C19orf18	0.307907	0.172183	0.444215
TROVE2	-0.334687	0.176522	-0.482851
INPP5D	0.317891	0.177827	0.45862
MFSD11	0.253606	0.178038	0.365876
CDS1	-0.322651	0.181114	-0.465487
EMP1	0.184608	0.197429	0.266333
RP5-857K21.4	-0.327353	0.210827	-0.472271
LMO2	0.254175	0.211459	0.366697
RP11-242P2.1	-0.169921	0.212164	-0.245144
AC016831.7	-0.369309	0.222576	-0.5328
LYPD1	-0.191849	0.222956	-0.276779
RASGEF1A	0.199044	0.223946	0.287159
SLITRK5	0.269009	0.226242	0.388098
CPQ	-0.330035	0.230696	-0.476139
FAM182B	0.265158	0.234448	0.382542
VEZT	-0.247304	0.240826	-0.356785
AZIN1-AS1	0.335099	0.241161	0.483446
NTNG1	0.350857	0.244557	0.50618
FAM184A	-0.299338	0.245111	-0.431853
ASAP2	-0.330506	0.245247	-0.47682
NTN1	0.190478	0.245733	0.274802
TECR	-0.307861	0.253266	-0.44415
CUL4A	0.324798	0.256786	0.468585
CGNL1	-0.355079	0.261471	-0.512271
ATF3	0.288619	0.262268	0.41639
STK33	-0.309013	0.286176	-0.445812
ATOH8	0.265886	0.288175	0.383592
C1S	0.299832	0.290765	0.432567
GRK4	0.259893	0.297212	0.374947
IFI44L	0.181366	0.297551	0.261655
NCAM2	-0.194845	0.30003	-0.281102
PTCH1	-0.302656	0.303328	-0.43664
HDAC4	0.324226	0.30334	0.46776
MGAT5	0.310913	0.308545	0.448552
KCNN3	0.273916	0.309339	0.395177
KLKB1	-0.339763	0.311491	-0.490175
STARD4-AS1	-0.212035	0.314671	-0.305902
ROBO3	-0.321409	0.317833	-0.463695
CPNE6	-0.334961	0.319486	-0.483247
RP11-114G22.1	0.338761	0.322241	0.488728
EIF3E	-0.243354	0.325429	-0.351085
ZNF280D	-0.333077	0.329772	-0.480528
SLITRK2	-0.328761	0.33576	-0.474301
GTF2IRD1	0.283643	0.337724	0.409211
NEBL	0.171265	0.341788	0.247083
BAIAP2	0.258635	0.351415	0.373131
GRID2	-0.513104	0.351887	-0.740253
BCAN	-0.292991	0.355747	-0.422696
MYRIP	0.292026	0.363358	0.421305
SIRPA	-0.347545	0.371977	-0.501402
AIG1	-0.189551	0.374855	-0.273465
ZNF148	-0.343854	0.379053	-0.496076
ATP1A2	-0.151343	0.381186	-0.218342
SEMA6A	0.32396	0.392259	0.467375
AC069368.3	0.341515	0.395192	0.492703
GOLGA4	0.293679	0.418396	0.423689
NR4A3	0.349468	0.433286	0.504176
RP11-347C12.1	0.2132	0.438792	0.307583
RFTN2	-0.28632	0.441776	-0.413072
MEF2C	-0.346005	0.445314	-0.499179
BZRAP1	-0.299993	0.452634	-0.432798
TUBB2A	-0.307949	0.453049	-0.444276
UQCRB	-0.360996	0.460085	-0.520807
CNN3	0.303399	0.464676	0.437712
TMEM104	0.408178	0.473417	0.588877
PTP4A3	0.229597	0.474703	0.331239
TESK2	0.31725	0.478277	0.457695
ZNF273	0.225874	0.479505	0.325867
BTAF1	0.304027	0.488069	0.438618
ITGB8	0.322377	0.492315	0.465092
CTC-458I2.2	-0.295415	0.4943	-0.426193
LENG8	0.245287	0.496085	0.353874
CD9	0.290598	0.496906	0.419244
CACNA1A	-0.32459	0.499658	-0.468285
NUPR1	0.282883	0.503467	0.408114
EPHA4	-0.259497	0.526417	-0.374375
NAPA	0.311538	0.535737	0.449454
MED31	-0.225942	0.54909	-0.325965
SLC19A2	0.269771	0.551974	0.389197
FAM196A	-0.191731	0.553134	-0.27661
RAB11FIP3	0.305832	0.575899	0.441223
CTPS2	0.239101	0.578206	0.344949
CARNS1	-0.323172	0.582688	-0.466238
KHDRBS1	0.240563	0.584981	0.34706
PABPC1	0.304239	0.595942	0.438924
A2ML1-AS1	-0.215735	0.603454	-0.31124
RBM25	0.276597	0.605571	0.399046
NUDT4	0.247917	0.60658	0.357669
MTX2	-0.237991	0.614516	-0.343348
RNF144B	-0.193184	0.622392	-0.278705
SLC2A12	-0.193177	0.627397	-0.278695
CSPP1	0.267543	0.638684	0.385983
VIMP	-0.209297	0.639106	-0.301952
PLCG1	-0.316666	0.662426	-0.456853
NFIC	0.244021	0.666305	0.352048
ASCC1	0.341244	0.669751	0.492312
RAPGEF3	-0.343635	0.687476	-0.49576
SPDYE3	-0.343815	0.698825	-0.49602
NEXN	0.134415	0.709342	0.193919
NAMPT	0.330813	0.711755	0.477262
SMARCC1	0.284643	0.719707	0.410653
VPS37B	0.246856	0.739274	0.356139
ADM	0.341533	0.741493	0.492728
BRD2	0.275211	0.748358	0.397045
CYC1	-0.23213	0.757129	-0.334893
BRINP2	-0.304358	0.759619	-0.439096
DPYSL2	0.247347	0.760847	0.356847
RGS22	0.226233	0.773637	0.326385
PARP14	0.293456	0.778693	0.423367
RP11-403A3.3	0.0937718	0.782096	0.135284
GFRA1	-0.253568	0.784448	-0.365821
AC005592.2	-0.255111	0.788905	-0.368047
RP11-37B2.1	0.250423	0.791158	0.361284
SLC25A12	-0.232144	0.799322	-0.334913
CLVS2	-0.268124	0.799573	-0.386821
C10orf54	-0.33469	0.813308	-0.482855
CDH2	-0.324215	0.815571	-0.467744
PLPP4	0.203524	0.819347	0.293623
IL1RAPL1	-0.407065	0.828094	-0.587271
SDC4	-0.373315	0.842887	-0.53858
DLGAP1	0.264848	0.85145	0.382095
RGL3	0.281254	0.864125	0.405764
DIRC3	0.308464	0.873839	0.445019
TIMM23B	0.325045	0.888239	0.46894
NR2E1	-0.222835	0.897314	-0.321483
GRAMD3	0.185916	0.920783	0.268221
CDC42BPA	-0.24193	0.921991	-0.349031
MIDN	0.306626	0.939417	0.442368
PLCXD3	0.26912	0.954069	0.388258
NT5DC1	-0.233901	0.95971	-0.337448
CAPN2	0.25414	0.964063	0.366646
GABRG1	-0.311608	0.969213	-0.449555
OMG	-0.311089	0.970734	-0.448807
CD163L1	0.289661	0.973599	0.417892
AMER2	-0.3195	0.981534	-0.460942
HEPN1	-0.328805	0.993074	-0.474365
MT-ATP6	-0.4928	1	-0.71096
MEG3	-0.288389	1	-0.416058
TRIM9	-0.247121	1	-0.35652
NBEAL1	-0.297244	1	-0.428833
IGFN1	-0.309587	1	-0.44664
MYLK	0.312171	1	0.450367
HMBOX1	0.252548	1	0.36435
SH3TC2	-0.134633	1	-0.194234
FOXP1	-0.280313	1	-0.404406
SLC20A1	-0.296294	1	-0.427462
FOXO1	0.291838	1	0.421033
KCNIP4	-0.348385	1	-0.502613
SECISBP2	0.290492	1	0.419091
HSD17B6	-0.268287	1	-0.387057
PHKG1	0.315167	1	0.454689
LTBP1	0.265092	1	0.382447
RP11-679C8.2	-0.322222	1	-0.464868
CLASP1	-0.286841	1	-0.413824
TBL1XR1	-0.279501	1	-0.403235
BLMH	-0.228747	1	-0.330012
PCNXL2	-0.276621	1	-0.39908
MYOF	0.181259	1	0.261502
ZNF521	-0.318078	1	-0.458889
CDC42EP4	0.316471	1	0.456571
AP000797.3	-0.247591	1	-0.357199
RNF115	0.290379	1	0.418928
RAB7A	0.231284	1	0.333672
WDR45	0.276589	1	0.399034
SRSF3	0.321419	1	0.463709
SNCA	0.233201	1	0.336438
ZFHX4-AS1	-0.260372	1	-0.375637
ARHGAP32	-0.297418	1	-0.429084
RNPC3	-0.28852	1	-0.416246
AK4	-0.276353	1	-0.398693
DENND5A	0.310942	1	0.448594
SPDYE16	-0.257263	1	-0.371152
RGMA	0.270986	1	0.390951
RP11-142A5.1	-0.28097	1	-0.405355
LINC00884	0.219007	1	0.315961
LINC01470	-0.206509	1	-0.29793
AP003025.2	-0.286459	1	-0.413273
TMC6	0.245425	1	0.354073
SPTBN1	-0.25116	1	-0.362347
NR6A1	-0.32384	1	-0.467203
GNG12-AS1	-0.218969	1	-0.315905
RP11-347P5.1	-0.310671	1	-0.448204
FABP7	0.289608	1	0.417816
ZCCHC24	-0.248584	1	-0.358631
SMC5	0.276001	1	0.398185
EGR1	0.233588	1	0.336996
DDRGK1	0.26402	1	0.3809
NMNAT3	-0.224456	1	-0.323822
OLIG1	-0.280592	1	-0.404808
SLC39A14	0.209494	1	0.302236
MRAS	0.277301	1	0.40006
RP11-418I22.3	0.150009	1	0.216418
NCOA2	-0.281489	1	-0.406103
CCDC6	0.264548	1	0.381662
MPHOSPH6	-0.229728	1	-0.331427
KCNJ10	-0.319691	1	-0.461217
TRMT1	-0.275284	1	-0.397151
RP11-511B23.2	0.241073	1	0.347795
RGL2	-0.340017	1	-0.490541
ANKFY1	0.15402	1	0.222204
PTCHD2	0.262318	1	0.378446
CNTFR	-0.309684	1	-0.446779
SARAF	-0.312884	1	-0.451396
C9orf72	0.279939	1	0.403867
MSRB3	-0.303708	1	-0.438158
CAMK2G	0.23698	1	0.34189
PABPC4	0.221775	1	0.319953
SRGAP3	-0.2762	1	-0.398472
PHF21A	-0.302801	1	-0.436849
RCN2	-0.309128	1	-0.445977
BHLHE40	0.29924	1	0.431712
BID	0.2145	1	0.309459
STARD13	-0.249053	1	-0.359307
GPSM1	0.268468	1	0.387317
PXYLP1	0.210496	1	0.303681
SHMT1	0.19932	1	0.287558
IFITM2	0.2311	1	0.333407
ME1	-0.293498	1	-0.423428
CAMK4	-0.310556	1	-0.448037
ART3	0.159362	1	0.229911
HNMT	0.230506	1	0.332551
WWTR1	0.28759	1	0.414905
CHST10	-0.200297	1	-0.288968
ZNF83	0.285583	1	0.412009
GLI2	-0.295735	1	-0.426656
TAOK1	0.229262	1	0.330756
FMO5	-0.197973	1	-0.285615
LIMK2	0.20487	1	0.295565
LINC01515	0.27147	1	0.391649
WWC2	0.249461	1	0.359896
STIM1	0.261193	1	0.376822
ANKRD13A	0.238285	1	0.343773
SEMA3A	0.264648	1	0.381807
THSD1	-0.285084	1	-0.41129
SOBP	-0.252284	1	-0.363968
RP1-111D6.3	0.253763	1	0.366102
ERBB2IP	0.224044	1	0.323228
PTPN11	0.115674	1	0.166883
NPIPB4	0.215086	1	0.310303
PLCB4	0.191861	1	0.276797
FUT10	-0.287412	1	-0.414648
PIGN	-0.28303	1	-0.408326
KIAA1161	-0.203342	1	-0.29336
ZFPM2	-0.307978	1	-0.444318
RPL13A	0.317685	1	0.458322
FDFT1	0.319198	1	0.460505
SLC15A2	-0.23457	1	-0.338413
RPS4Y1	-0.232355	1	-0.335217
MSN	0.245518	1	0.354207
RP11-404I7.2	-0.293254	1	-0.423076
ESD	0.263563	1	0.380241
CYB5B	-0.286157	1	-0.412837
RHOBTB1	0.216187	1	0.311892
RP11-96H19.1	0.271512	1	0.391709
CHPT1	-0.243628	1	-0.35148
CTD-2054N24.2	0.203118	1	0.293038
2021-09-04	-0.304633	1	-0.439493
SMAD1	0.296532	1	0.427805
CCAR1	0.138966	1	0.200486
RHBDD2	-0.288383	1	-0.416048
POLD2	0.239252	1	0.345168
SLC18B1	0.244063	1	0.352109
GPC1	-0.307899	1	-0.444205
SAP30BP	0.294304	1	0.424591
LAMA5	0.238793	1	0.344505
ITSN1	-0.25269	1	-0.364554
ARFGAP1	0.255693	1	0.368886
PPM1L	-0.245199	1	-0.353747
MACROD2	-0.177993	1	-0.256789
NDRG4	-0.314354	1	-0.453517
POT1	0.194024	1	0.279917
DST	0.143938	1	0.207659
NELL2	0.277117	1	0.399796
ROR1	-0.210171	1	-0.303212
STK17B	-0.264351	1	-0.381378
WASF3	-0.307469	1	-0.443584
CHAC2	-0.210113	1	-0.303129
SFI1	0.248829	1	0.358985
BPTF	0.237409	1	0.342508
SPG7	0.245519	1	0.35421
STARD7	0.262832	1	0.379187
NBPF14	0.206262	1	0.297574
DGKG	-0.278933	1	-0.402415
MAPK10	-0.176599	1	-0.254778
GDAP1	-0.292677	1	-0.422244
ANO5	-0.292053	1	-0.421344
ZNF518A	-0.267766	1	-0.386305
LRRC49	-0.249577	1	-0.360064
SULF1	0.142303	1	0.2053
ZFY	-0.203259	1	-0.293241
GPT2	-0.299038	1	-0.43142
BCLAF1	0.287603	1	0.414923
NBL1	-0.180853	1	-0.260915
ANP32A	0.278971	1	0.40247
SLC6A11	-0.289159	1	-0.417168
BRINP1	0.231468	1	0.333938
IQCJ-SCHIP1	-0.189151	1	-0.272887
TMED10	0.234774	1	0.338707
CFAP70	0.280806	1	0.405118
DNAH6	0.26681	1	0.384926
COX11	-0.218239	1	-0.314853
MVP	0.222791	1	0.32142
OGFRL1	0.27134	1	0.391461
SH3GL1	0.245821	1	0.354645
SYNGR1	-0.261347	1	-0.377044
RP3-399L15.3	-0.236262	1	-0.340853
FAM110B	-0.244584	1	-0.35286
FAM126B	-0.235006	1	-0.339043
NT5DC3	0.163744	1	0.236233
ZNF704	0.2886	1	0.416362
RBKS	0.268312	1	0.387092
RGS11	-0.302014	1	-0.435714
ZNF609	0.236486	1	0.341177
CLIC4	0.201739	1	0.291048
SENP7	-0.23891	1	-0.344674
IFI44	0.138572	1	0.199916
GPR137C	0.251729	1	0.363168
PMP22	-0.297915	1	-0.429801
STX8	0.254895	1	0.367736
LINC01170	-0.0477373	1	-0.0688704
CTD-2561J22.3	0.204236	1	0.294651
AR	0.187317	1	0.270242
PRR12	0.155057	1	0.2237
HSD17B7	0.247433	1	0.35697
RBPMS	0.211731	1	0.305463
RP11-452H21.1	-0.218437	1	-0.315138
FNBP4	0.144414	1	0.208346
ATP6V0A1	0.242058	1	0.349217
AC009950.2	-0.121427	1	-0.175182
BRCA1	0.198512	1	0.286392
KANSL1L	-0.278313	1	-0.40152
RP11-778J15.1	-0.28	1	-0.403954
NR1D1	-0.257765	1	-0.371876
RP11-474G23.3	-0.229589	1	-0.331227
TTC21A	0.239635	1	0.345721
LARP7	0.240132	1	0.346438
RGS16	0.2803	1	0.404387
PLXNC1	0.247483	1	0.357042
FMN2	0.153001	1	0.220734
HERPUD2	-0.260431	1	-0.375723
SLC7A5	0.182016	1	0.262594
LINC00645	-0.211939	1	-0.305763
UBXN4	0.204709	1	0.295333
KCTD13	0.202619	1	0.292317
GADD45G	0.467744	1	0.674811
ZBTB7C	0.280349	1	0.404458
HSPA9	0.307953	1	0.444282
AC007682.1	-0.298686	1	-0.430912
HP1BP3	-0.307035	1	-0.442958
ASRGL1	-0.272929	1	-0.393754
SLC7A11	0.223525	1	0.322479
ABHD2	-0.303487	1	-0.437839
SRBD1	0.251186	1	0.362384
TMEM47	-0.299719	1	-0.432403
CYBRD1	-0.296109	1	-0.427195
FBXO21	-0.271744	1	-0.392044
C4orf48	-0.268252	1	-0.387006
UNC80	0.0702393	1	0.101334
RNF182	-0.253956	1	-0.366381
GPC4	0.238668	1	0.344325
PRPF8	0.287629	1	0.414961
PON2	-0.214722	1	-0.309779
C6orf62	-0.315868	1	-0.455702
LINC01314	-0.283998	1	-0.409722
ZEB2	-0.260376	1	-0.375643
ANKRD12	0.217936	1	0.314416
TMEM132A	-0.282241	1	-0.407188
MIR219A2	-0.306263	1	-0.441844
JKAMP	-0.21551	1	-0.310916
RAP1GDS1	-0.287768	1	-0.415161
S1PR1	-0.275664	1	-0.3977
C10orf11	-0.266475	1	-0.384442
C3orf70	-0.264895	1	-0.382162
RUNX1T1	-0.295922	1	-0.426926
GPSM2	-0.220467	1	-0.318066
CAMK2D	0.191231	1	0.275888
OGT	-0.288068	1	-0.415594
SORBS3	-0.227634	1	-0.328406
SLC9A9	0.23605	1	0.340549
CASD1	-0.250061	1	-0.360761
HEPACAM	-0.286272	1	-0.413003
CCNL1	0.207404	1	0.299221
GATSL2	0.263573	1	0.380256
ENPP4	-0.160597	1	-0.231693
APBA1	-0.268479	1	-0.387333
RP11-263K19.4	0.264081	1	0.380988
VIM	0.268571	1	0.387466
TBC1D4	-0.214548	1	-0.309527
RP11-133F8.2	-0.138776	1	-0.200211
NDP	-0.222396	1	-0.32085
ETV5	-0.17468	1	-0.25201
GON4L	0.260761	1	0.376198
SIDT1	0.0913544	1	0.131797
CBR4	-0.186498	1	-0.26906
PNPLA6	0.252795	1	0.364706
CTA-29F11.1	0.338228	1	0.48796
SCML1	-0.222506	1	-0.321008
EAF2	-0.255264	1	-0.368268
CTA-373H7.7	-0.0807521	1	-0.116501
CIT	0.208641	1	0.301005
DOCK3	0.221066	1	0.318931
ADRA1B	-0.12552	1	-0.181087
FOXN2	-0.249627	1	-0.360135
ROGDI	-0.281482	1	-0.406093
KCNMB2-AS1	-0.302041	1	-0.435753
DOCK11	0.154159	1	0.222404
STARD9	0.184015	1	0.265478
FMR1	-0.220793	1	-0.318536
GSTM5	-0.155637	1	-0.224537
PEX5L	-0.32925	1	-0.475007
GRIA3	0.21971	1	0.316974
CHST6	0.118816	1	0.171416
MAP7	0.228017	1	0.328959
MT-ND1	-0.439288	1	-0.633758
CCNH	0.233243	1	0.336498
EMD	0.212093	1	0.305986
PSMB5	-0.224046	1	-0.32323
IQCE	0.180966	1	0.261079
MMP16	-0.250959	1	-0.362058
ZNF318	0.235784	1	0.340164
CFAP43	0.205413	1	0.296348
GTF2IRD2B	0.212684	1	0.306838
ST7	0.186252	1	0.268704
RP11-849H4.2	-0.238361	1	-0.343882
SF3A3	0.175102	1	0.252619
AC002117.1	0.206128	1	0.29738
TMOD2	-0.2875	1	-0.414775
LCA5	0.209542	1	0.302305
SLC7A8	0.164486	1	0.237303
MKRN3	-0.27725	1	-0.399987
PDLIM5	-0.216794	1	-0.312767
DTWD1	-0.231171	1	-0.333509
AC007389.3	-0.2124	1	-0.306428
RNF150	0.204826	1	0.295501
LRP1	-0.261615	1	-0.377431
PIP4K2A	-0.286899	1	-0.413907
CLEC16A	0.251196	1	0.362399
ZNF771	-0.0904367	1	-0.130473
MIR99AHG	-0.088719	1	-0.127994
LRRN3	-0.293421	1	-0.423317
LRP8	-0.202011	1	-0.29144
RP11-386I14.4	0.123168	1	0.177694
STAG1	0.247516	1	0.357091
UTRN	0.24188	1	0.348959
CDK17	0.266211	1	0.384061
CDKN1A	0.227977	1	0.328901
SYT11	-0.229087	1	-0.330503
TMA7	-0.263337	1	-0.379915
RP11-776H12.1	-0.221763	1	-0.319937
AK6	-0.180577	1	-0.260518
JDP2	0.282145	1	0.40705
CLCN3	-0.263945	1	-0.380792
TUBA1A	0.289273	1	0.417332
MTCH2	0.194744	1	0.280957
RP4-598P13.1	-0.110526	1	-0.159455
IDI2-AS1	-0.219079	1	-0.316064
DAG1	-0.26115	1	-0.37676
CLTA	0.224093	1	0.323298
TANC1	0.225226	1	0.324933
HERC6	0.207435	1	0.299265
SUCLG2-AS1	-0.246326	1	-0.355373
POLR2C	-0.191059	1	-0.27564
TMEM232	-0.258977	1	-0.373625
LINC01572	-0.256113	1	-0.369493
PRAM1	0.0962192	1	0.138815
ERCC6L2	-0.279782	1	-0.403641
RBM6	0.199183	1	0.28736
SGPL1	-0.150628	1	-0.21731
HGSNAT	0.252509	1	0.364294
MTDH	0.228757	1	0.330027
TRIM47	0.23525	1	0.339394
YY1AP1	0.221897	1	0.32013
EMX2OS	-0.293212	1	-0.423015
GK5	0.173233	1	0.249922
CLU	0.127396	1	0.183794
NEK10	-0.202462	1	-0.292092
PRMT8	-0.0867072	1	-0.125092
MLC1	-0.254718	1	-0.36748
C9orf85	-0.236036	1	-0.340528
SLF1	0.161627	1	0.233178
CTTN	0.170722	1	0.246299
SLC39A12	-0.241931	1	-0.349033
COX7C	-0.218772	1	-0.315621
CYFIP2	-0.261896	1	-0.377836
RP11-176H8.1	0.153566	1	0.221549
TOM1L2	-0.252086	1	-0.363683
RNLS	-0.260588	1	-0.37595
MAP2K6	0.207709	1	0.29966
L2HGDH	0.148907	1	0.214828
NDUFB4	-0.158057	1	-0.228028
PLEKHA6	-0.250718	1	-0.36171
PIK3C2B	-0.224892	1	-0.32445
SOD2	0.266047	1	0.383825
MAMDC2-AS1	0.184993	1	0.266889
CAPN5	0.158872	1	0.229205
RP5-894A10.2	-0.224279	1	-0.323566
EXT2	0.222401	1	0.320856
PTPN2	0.208762	1	0.301179
BDP1	0.13368	1	0.19286
SDK1	-0.228065	1	-0.329028
IFRD1	0.270333	1	0.390008
CACHD1	-0.174465	1	-0.251699
PITPNM2	0.243688	1	0.351568
TMEM192	-0.212453	1	-0.306505
SPP1	0.261318	1	0.377002
AC026167.1	-0.212972	1	-0.307254
ZSWIM6	-0.000645457	1	-0.000931198
TPP1	-0.255386	1	-0.368445
EIF1AY	-0.163704	1	-0.236175
DDX17	-0.153358	1	-0.221249
KDM5B	-0.277911	1	-0.400941
ZNF827	-0.270169	1	-0.389771
PAXBP1	0.231581	1	0.334101
KCNMA1	-0.186151	1	-0.268559
KIF5C	0.212177	1	0.306107
NCAN	-0.169855	1	-0.245049
ZNF718	0.211875	1	0.305671
TMEM59L	-0.120594	1	-0.173981
PPM1B	-0.272052	1	-0.392488
SLC6A8	0.188758	1	0.27232
2021-03-02	0.258084	1	0.372336
UNC5B	0.190454	1	0.274767
PCDH10	-0.239377	1	-0.345348
CHI3L1	-0.403329	1	-0.58188
ZKSCAN1	0.240577	1	0.34708
DEPTOR	0.198942	1	0.287012
NCOR1	0.179416	1	0.258842
SDS	0.104173	1	0.150289
SDK2	0.205078	1	0.295864
SPDYE2	-0.247614	1	-0.357232
MAP3K10	0.123308	1	0.177896
ZSWIM5	-0.26419	1	-0.381146
HES4	-0.195569	1	-0.282147
FKBP2	-0.250701	1	-0.361685
PAK1	0.216195	1	0.311903
RP5-1042K10.10	-0.129696	1	-0.187112
AHDC1	0.194597	1	0.280743
ATP2A2	-0.281384	1	-0.405952
IWS1	0.21721	1	0.313368
ANKDD1A	0.213284	1	0.307704
MS4A13	-0.190577	1	-0.274945
IGSF10	-0.261742	1	-0.377613
PDE3A	-0.273164	1	-0.394092
GAREM1	0.19449	1	0.280589
ALK	0.242116	1	0.349299
SLC27A1	-0.26729	1	-0.385618
AFF4	0.237635	1	0.342834
YARS	0.195202	1	0.281617
CCNI	-0.217841	1	-0.314278
ACAA1	-0.258217	1	-0.372529
RP11-16L14.2	0.226021	1	0.32608
FAM227A	0.209752	1	0.302608
WSCD2	0.13244	1	0.19107
GINS3	0.229674	1	0.33135
NTSR2	-0.265485	1	-0.383013
LHFP	-0.217448	1	-0.313711
STXBP6	-0.277511	1	-0.400364
TSHZ1	-0.217715	1	-0.314097
WBP2NL	0.14508	1	0.209307
ABI3BP	0.235652	1	0.339975
CEMIP	0.230135	1	0.332015
CALD1	0.227584	1	0.328335
LINC00632	0.207323	1	0.299104
CDR2	0.255519	1	0.368636
ATP6V0E2	-0.228945	1	-0.330297
NUP58	-0.217773	1	-0.31418
NF1	-0.215264	1	-0.310561
UGGT1	0.14528	1	0.209595
SKAP2	0.1161	1	0.167498
PIK3IP1	-0.233252	1	-0.336511
HIPK3	0.219184	1	0.316216
SCARB2	-0.213475	1	-0.30798
FUS	0.224598	1	0.324026
NDUFS3	-0.247196	1	-0.356628
TTC39B	-0.149498	1	-0.21568
C1QL1	0.0806145	1	0.116302
CCDC146	0.256614	1	0.370216
ISG15	0.238996	1	0.344799
TPTEP1	0.166138	1	0.239687
PPARA	0.184049	1	0.265527
KIF22	-0.201735	1	-0.291042
CLK4	-0.219551	1	-0.316745
IL16	-0.122859	1	-0.177248
RP11-577H5.5	0.225209	1	0.324908
NR2F1-AS1	-0.211106	1	-0.304561
RLF	0.215459	1	0.310842
DENND1B	-0.246667	1	-0.355866
LRFN5	0.21121	1	0.304712
PARD3	0.15943	1	0.23001
HTR2A	0.062413	1	0.0900429
RIC3	-0.226954	1	-0.327425
MKL1	0.240159	1	0.346477
KIDINS220	-0.207758	1	-0.299732
ELAVL1	0.227612	1	0.328375
GS1-114I9.3	0.106322	1	0.153391
AP3M2	-0.192444	1	-0.277639
THSD4	-0.186525	1	-0.269099
RP11-287D1.3	0.0876938	1	0.126515
RP11-210M15.2	0.160649	1	0.231768
LHX2	-0.26897	1	-0.388041
SPTLC1	0.204324	1	0.294777
C14orf37	-0.184612	1	-0.26634
PC	0.213455	1	0.307951
EPS15L1	0.152375	1	0.21983
XPO1	-0.248044	1	-0.357851
XRRA1	-0.150589	1	-0.217255
KREMEN1	0.242711	1	0.350158
TEX14	0.156006	1	0.225069
GABARAPL1	0.198986	1	0.287076
MID1	-0.269028	1	-0.388126
STEAP1B	0.218791	1	0.315648
PRDX3	-0.184626	1	-0.26636
C14orf166	-0.154152	1	-0.222394
PRELID2	-0.225608	1	-0.325484
CA12	-0.193155	1	-0.278664
SIK3	-0.10104	1	-0.14577
PTK2	-0.182665	1	-0.26353
CLDN12	-0.0769638	1	-0.111035
CAMK1	-0.241296	1	-0.348117
LDLRAD4	-0.212805	1	-0.307013
ADRA1A	0.143237	1	0.206647
PSRC1	0.231407	1	0.333849
SPRY4	-0.081616	1	-0.117747
RP3-403A15.5	-0.0597031	1	-0.0861334
GPRIN3	0.113697	1	0.16403
MOB1B	0.203628	1	0.293773
MAGOH	-0.124762	1	-0.179994
CAPN3	0.228054	1	0.329013
PPP4R3A	0.177287	1	0.255772
CREBBP	0.222719	1	0.321316
FGF14	-0.20264	1	-0.292347
BCL7C	0.20876	1	0.301177
NSUN2	0.200677	1	0.289516
SORCS3	0.164318	1	0.23706
AC012358.8	-0.200903	1	-0.289842
EXT1	-0.255528	1	-0.368649
IKBKB	0.123249	1	0.17781
PDGFC	-0.244403	1	-0.352599
UBALD1	-0.139431	1	-0.201157
TP53BP2	-0.262366	1	-0.378515
XPC	0.215068	1	0.310277
YAE1D1	-0.20793	1	-0.299979
KLHL2	-0.259437	1	-0.374289
ILDR2	-0.244403	1	-0.352599
CCSAP	-0.0446527	1	-0.0644202
USP42	0.21365	1	0.308232
HSPA1A	-0.213108	1	-0.307449
PYGO1	-0.206972	1	-0.298597
SMOC1	0.181361	1	0.261649
RNF20	0.0892717	1	0.128792
NPEPPS	0.156052	1	0.225136
SSX2IP	-0.211908	1	-0.305719
MIR124-2HG	-0.156446	1	-0.225704
CSNK1A1	-0.192188	1	-0.277268
FOXN3	-0.221534	1	-0.319606
ERBB3	0.114333	1	0.164948
PTH1R	0.170837	1	0.246465
ARHGEF9	-0.228532	1	-0.329702
CPNE4	-0.213818	1	-0.308473
PPCDC	0.182738	1	0.263636
GAPDH	0.199578	1	0.28793
SETD7	0.145293	1	0.209613
RARRES3	0.156376	1	0.225603
CCND2	0.110528	1	0.159459
FSTL5	-0.123186	1	-0.17772
ATXN10	-0.245105	1	-0.353612
RNF19B	0.237398	1	0.342493
UBE2E3	-0.252165	1	-0.363798
MAPT-AS1	0.108165	1	0.156049
ARL17A	0.1445	1	0.20847
CNTNAP2	-0.222718	1	-0.321314
PFKM	-0.183548	1	-0.264803
COL23A1	-0.207884	1	-0.299914
PMVK	-0.122024	1	-0.176043
HINFP	-0.204873	1	-0.295569
ST6GALNAC3	0.203737	1	0.29393
EFNB2	-0.150478	1	-0.217094
MYH7B	0.158283	1	0.228354
GUCY1A2	-0.166723	1	-0.24053
BCL2L1	0.22899	1	0.330363
NONO	0.0831035	1	0.119893
TIAM1	0.241654	1	0.348632
SNHG21	-0.155537	1	-0.224392
AGBL1	-0.197594	1	-0.285069
ITGB5-AS1	-0.196406	1	-0.283354
KB-1507C5.4	0.201111	1	0.290142
DDIT4	0.227654	1	0.328435
RP11-10L7.1	0.139877	1	0.201799
DTX4	-0.142149	1	-0.205077
ARHGAP29	-0.181642	1	-0.262054
CIC	0.164467	1	0.237276
TMEM98	-0.156883	1	-0.226334
YIPF5	-0.150052	1	-0.216479
AP2A2	0.0675357	1	0.0974335
SERP2	-0.208507	1	-0.300812
TTN-AS1	-0.256326	1	-0.3698
RAD54L2	0.166415	1	0.240086
CH507-513H4.1	-0.317843	1	-0.458551
FNBP1	0.0946375	1	0.136533
NUFIP2	-0.0108913	1	-0.0157129
HDDC2	-0.228397	1	-0.329507
RNF125	0.20469	1	0.295306
IDS	-0.236917	1	-0.341799
MMD2	0.0831064	1	0.119897
IPO8	-0.156941	1	-0.226418
TMEM178B	0.235359	1	0.339551
ORC5	-0.199789	1	-0.288235
LHFPL3	-0.158815	1	-0.229122
PHF20L1	-0.238733	1	-0.344419
CTD-2008L17.2	0.0783427	1	0.113025
ID4	0.206241	1	0.297543
SVIP	-0.153521	1	-0.221484
MROH8	0.215284	1	0.310589
SALL3	-0.239743	1	-0.345876
MRPL43	0.0189423	1	0.0273279
NRXN3	-0.199166	1	-0.287335
RP11-553L6.5	-0.238778	1	-0.344484
NSMAF	0.147767	1	0.213183
PEX2	-0.151878	1	-0.219113
PRMT2	0.209944	1	0.302885
CYP7B1	-0.240519	1	-0.346996
OXA1L	0.141056	1	0.203501
UQCRC1	-0.217558	1	-0.31387
INF2	-0.218748	1	-0.315587
RP11-561I11.4	-0.226314	1	-0.326502
AK9	0.220422	1	0.318002
EHBP1	0.0869049	1	0.125377
C11orf80	0.174476	1	0.251716
BAALC	-0.249626	1	-0.360134
RPS6KA2	-0.173042	1	-0.249647
RP11-69E11.4	0.197852	1	0.28544
TMEM9B	-0.198362	1	-0.286176
DOCK8	-0.142214	1	-0.205171
GRM8	0.0707816	1	0.102116
OBFC1	0.122645	1	0.17694
ST3GAL1	-0.157217	1	-0.226816
DPP10-AS3	0.135892	1	0.196051
SPRY2	-0.244536	1	-0.35279
CEND1	-0.191542	1	-0.276337
LRRFIP2	0.213311	1	0.307742
ZFAND4	-0.148513	1	-0.214258
DENND1A	-0.22702	1	-0.32752
CALCRL	0.172514	1	0.248885
SYT9	-0.21921	1	-0.316253
NXPH1	-0.18509	1	-0.267029
DNAJC2	0.173859	1	0.250826
LINC00843	0.175029	1	0.252513
SIPA1L3	0.196691	1	0.283765
NFE2L2	-0.208636	1	-0.300999
IFNGR2	-0.0420042	1	-0.0605993
CACNA1B	-0.246441	1	-0.355539
TAOK3	-0.168295	1	-0.242799
USMG5	-0.226768	1	-0.327157
C11orf74	-0.123527	1	-0.178212
SAT2	-0.188656	1	-0.272173
ZNF131	0.204383	1	0.294863
MTURN	0.186125	1	0.268522
C10orf90	-0.222877	1	-0.321543
CEBPB	0.221341	1	0.319327
MBNL3	-0.182554	1	-0.26337
MIR325HG	0.209187	1	0.301793
SREK1	0.2177	1	0.314075
SMIM19	0.170185	1	0.245526
ACTR6	-0.163587	1	-0.236006
SERP1	-0.224094	1	-0.323299
AC017101.10	-0.171317	1	-0.247158
STAU2	-0.227988	1	-0.328917
ZC3H14	-0.228555	1	-0.329735
AC004076.9	0.174138	1	0.251229
ANKRD29	-0.201578	1	-0.290815
SEC24B	0.210095	1	0.303104
ARF4	0.196774	1	0.283885
LIN7A	-0.165772	1	-0.239159
NEGR1	-0.233056	1	-0.336229
PRKCA-AS1	-0.149659	1	-0.215912
SMARCA1	0.220313	1	0.317845
NLGN3	-0.20366	1	-0.293819
TEAD1	-0.223106	1	-0.321873
EZR	0.212618	1	0.306743
TCF7L1	0.156331	1	0.225538
TMEM144	-0.248553	1	-0.358586
SLC13A3	0.218726	1	0.315555
FHIT	-0.162806	1	-0.23488
ZNF292	-0.174842	1	-0.252243
FAM85B	0.211163	1	0.304644
CDK5RAP3	-0.195789	1	-0.282463
XPO5	0.125904	1	0.181642
C3orf58	-0.230022	1	-0.331851
TRIM56	0.211263	1	0.304788
PARP4	0.204019	1	0.294338
ADAM33	-0.213204	1	-0.307589
WDR11	0.207003	1	0.298643
MUM1	0.182494	1	0.263283
SEPW1	-0.175367	1	-0.253001
GPX1	-0.112247	1	-0.161938
STON2	-0.171101	1	-0.246846
NDUFA4	0.0709853	1	0.10241
RP11-217L21.1	-0.139219	1	-0.20085
OXR1	-0.233965	1	-0.33754
DPF3	0.214859	1	0.309977
UQCR10	-0.167405	1	-0.241515
KALRN	-0.196368	1	-0.283299
ELMO1	-0.262505	1	-0.378715
DAAM1	0.182658	1	0.26352
CA8	-0.235904	1	-0.340337
SALL1	-0.199761	1	-0.288195
CIB1	-0.0810612	1	-0.116947
AMT	-0.181009	1	-0.261141
PABPN1	-0.227895	1	-0.328783
BOLA3	-0.149036	1	-0.215013
PLSCR1	0.168283	1	0.242782
ARFGAP3	0.128149	1	0.18488
HDGF	0.0833804	1	0.120293
ENTPD4	0.162545	1	0.234502
ARHGAP10	0.129234	1	0.186446
PPP2R5A	-0.22584	1	-0.325818
AGAP4	0.0985525	1	0.142181
QKI	-0.117234	1	-0.169133
CRY1	0.141266	1	0.203804
PGM2L1	0.16063	1	0.23174
TM7SF2	-0.208386	1	-0.300637
DCLRE1C	-0.208106	1	-0.300233
CAST	0.214566	1	0.309553
SRSF2	-0.225737	1	-0.32567
FAM89B	-0.12319	1	-0.177726
GRM1	-0.174695	1	-0.252032
SH3GLB2	-0.258259	1	-0.372589
KDM7A	0.128995	1	0.1861
ATP5D	0.127338	1	0.18371
CHN1	-0.208422	1	-0.30069
VPS41	-0.212556	1	-0.306654
NSMF	0.226113	1	0.326212
SGF29	0.177509	1	0.256091
PACS1	0.184167	1	0.265697
HDAC11	-0.213853	1	-0.308525
KITLG	0.149408	1	0.215551
DDR2	0.251187	1	0.362386
DGKE	-0.10293	1	-0.148497
RPL13	-0.075458	1	-0.108863
MRPL19	-0.135884	1	-0.196039
CDK2AP2	0.257226	1	0.371098
ZNRF3	0.169185	1	0.244083
MACROD1	0.099837	1	0.144034
TSHR	-0.118742	1	-0.171308
MALRD1	-0.236952	1	-0.34185
MDM4	0.203967	1	0.294263
OSBPL9	0.0482312	1	0.0695829
TMTC1	0.225713	1	0.325634
CHKA	-0.171456	1	-0.247359
MBD5	-0.177069	1	-0.255456
SNRPN	0.200787	1	0.289675
SF3B2	0.19428	1	0.280287
LINC00278	-0.199789	1	-0.288234
ERICH1-AS1	-0.056647	1	-0.0817243
PCP4L1	-0.0487556	1	-0.0703394
HIP1	0.227557	1	0.328295
UMAD1	-0.0374407	1	-0.0540155
HSPA8	-0.165187	1	-0.238314
ST8SIA1	0.226282	1	0.326455
ALS2CR11	-0.211647	1	-0.305342
CXXC5	0.188232	1	0.271561
LUC7L	0.227226	1	0.327817
AC144449.1	-0.191362	1	-0.276077
SLIT1	-0.176908	1	-0.255224
PDZRN3	-0.220342	1	-0.317886
PDE1A	-0.218184	1	-0.314773
RP3-525N10.2	-0.166048	1	-0.239556
MINK1	0.187016	1	0.269807
DENND4A	0.164194	1	0.236882
ST5	0.200162	1	0.288772
ABHD18	0.196325	1	0.283237
C1orf54	-0.179914	1	-0.259562
NPIPB5	0.143376	1	0.206848
PARP11	-0.139024	1	-0.200569
ZC3H6	0.17845	1	0.257449
NIPAL3	0.147131	1	0.212265
GPR137	-0.191549	1	-0.276347
PDCD6	0.148054	1	0.213597
AKAP9	0.203291	1	0.293287
POU3F3	-0.223024	1	-0.321756
DNAH14	-0.192508	1	-0.27773
PRKD3	0.161226	1	0.232599
RP11-289H16.1	0.151703	1	0.218861
ORC4	-0.207788	1	-0.299774
CUTA	0.201953	1	0.291357
PDCD5	0.104727	1	0.15109
MFAP3	-0.154009	1	-0.222189
CIRBP	-0.18437	1	-0.26599
SOX9	-0.244027	1	-0.352057
ZNF277	-0.193474	1	-0.279124
ILK	-0.213631	1	-0.308205
C1QL2	-0.113208	1	-0.163325
AP3S1	-0.179058	1	-0.258325
HMGN2	-0.175715	1	-0.253503
LDLRAD3	-0.190629	1	-0.27502
SBF1	0.190524	1	0.274868
IL34	-0.10572	1	-0.152522
TMEM220	-0.197043	1	-0.284272
IDH1	-0.217502	1	-0.313789
RSU1	0.185605	1	0.267772
KIF6	0.196361	1	0.283289
CARM1	0.130491	1	0.188258
PMS2	0.158124	1	0.228124
PLEKHM2	0.124357	1	0.179409
RAB1A	0.167696	1	0.241935
RP11-131L23.1	-0.167253	1	-0.241294
BIN3	0.191781	1	0.276681
POMT1	0.167366	1	0.241458
CDC14B	-0.190182	1	-0.274375
SLC26A5	0.159502	1	0.230113
ZNF737	0.14333	1	0.206782
CA5B	0.173105	1	0.249738
PEBP1	0.183864	1	0.26526
APBB2	-0.170974	1	-0.246664
HYOU1	-0.140311	1	-0.202425
SH3RF3	-0.237293	1	-0.342341
SYCP2L	0.104927	1	0.151378
ZNF586	0.213645	1	0.308224
SESN1	0.155555	1	0.224419
SPDYE5	-0.21799	1	-0.314493
PLTP	0.213605	1	0.308167
OAZ2	-0.182031	1	-0.262615
CEPT1	-0.160664	1	-0.231789
AP4S1	-0.14341	1	-0.206896
EIF3H	-0.212415	1	-0.306451
KIRREL3	-0.200394	1	-0.289108
MAP4K4	-0.156284	1	-0.225471
ZFAND1	-0.165006	1	-0.238053
PRNP	-0.218439	1	-0.315141
RFX2	0.182477	1	0.263259
NECAB1	-0.1174	1	-0.169372
NKTR	0.0267487	1	0.0385902
TMEM2	-0.151756	1	-0.218938
NKX2-2	-0.113488	1	-0.163729
KCND3	-0.238449	1	-0.34401
EEF1B2	-0.129888	1	-0.187389
FAP	0.156912	1	0.226377
BMP1	0.171556	1	0.247503
SNX17	-0.192346	1	-0.277496
DDA1	-0.175337	1	-0.252958
TTC3	0.0912071	1	0.131584
DDX3Y	0.0310059	1	0.044732
MVD	0.221284	1	0.319246
MOBP	-0.251944	1	-0.363479
GSS	-0.176106	1	-0.254067
KIAA1841	0.203519	1	0.293616
MAP3K4	-0.21897	1	-0.315907
FLII	0.128979	1	0.186077
RP11-181B18.1	-0.159512	1	-0.230128
ARMC9	-0.215325	1	-0.310648
CAPS2	-0.21447	1	-0.309415
ARSJ	-0.179094	1	-0.258378
RP11-219A15.1	0.083021	1	0.119774
SHISA6	-0.228724	1	-0.329978
ZFYVE9	0.202103	1	0.291573
SOCS5	-0.177762	1	-0.256457
NKAIN2	-0.249859	1	-0.36047
RP11-624M8.1	0.151425	1	0.218459
CAP2	0.153964	1	0.222123
BTD	0.155898	1	0.224913
TOMM7	-0.132049	1	-0.190507
DIRAS1	-0.0709072	1	-0.102297
SPTBN2	-0.0712564	1	-0.102801
TULP3	-0.210713	1	-0.303994
JMJD6	-0.13274	1	-0.191503
CPS1	-0.119992	1	-0.173111
GLRB	-0.109585	1	-0.158097
TMEM254-AS1	0.169068	1	0.243914
CAAP1	-0.145175	1	-0.209443
CASC1	0.166119	1	0.239659
RP11-517O13.1	-0.139357	1	-0.20105
SNX25	0.206494	1	0.297907
SNTA1	-0.244886	1	-0.353296
METTL9	-0.198355	1	-0.286166
LARP4	0.159563	1	0.230201
ESYT2	0.222609	1	0.321157
SLC35E3	0.156307	1	0.225504
DYNLL1	-0.227057	1	-0.327575
CDH11	-0.218661	1	-0.315461
DCTN2	-0.138974	1	-0.200497
TANK	-0.223514	1	-0.322463
FLNA	0.0457909	1	0.0660623
HLF	-0.135914	1	-0.196082
CMTM5	-0.186241	1	-0.268689
FGF1	0.219374	1	0.316489
BLM	0.109202	1	0.157545
YPEL5	0.0552323	1	0.0796833
CNP	-0.248416	1	-0.358389
TTTY10	-0.179509	1	-0.258976
KBTBD12	-0.218968	1	-0.315905
ARHGAP31	-0.207923	1	-0.299969
TOMM40	0.1667	1	0.240497
RNF149	0.200554	1	0.289339
FANCL	0.198335	1	0.286137
NRG3	-0.0722222	1	-0.104195
TMEM168	-0.216875	1	-0.312885
ARHGAP42	0.204544	1	0.295095
UQCRC2	-0.208339	1	-0.30057
LAPTM4B	0.160752	1	0.231917
CADM3	-0.215359	1	-0.310698
ANK3	-0.265798	1	-0.383466
VCP	0.141713	1	0.204448
GATM	0.216445	1	0.312265
PAPD4	-0.231739	1	-0.334329
CLYBL	-0.21729	1	-0.313484
OLFM1	-0.178517	1	-0.257546
REV3L	0.156321	1	0.225523
NOS1AP	0.0942093	1	0.135915
PFKL	-0.192024	1	-0.277032
SLC25A37	-0.218502	1	-0.315231
HSP90AA1	-0.279558	1	-0.403317
RP11-26J3.1	-0.174901	1	-0.252329
BCAS1	-0.159694	1	-0.23039
RPS24	-0.215238	1	-0.310523
SMPD4	0.218983	1	0.315926
ITPKC	0.0858748	1	0.123891
DDX46	0.198101	1	0.285799
TRIM8	-0.196563	1	-0.28358
ENTPD2	0.158004	1	0.227951
RAP2C-AS1	-0.194123	1	-0.28006
FADS2	0.191227	1	0.275882
CTNNA3	-0.282081	1	-0.406957
MGLL	-0.220855	1	-0.318627
INPP4A	0.20962	1	0.302418
LINGO2	-0.124341	1	-0.179386
MRPS35	-0.121243	1	-0.174917
CFAP20	0.130012	1	0.187568
LINC-PINT	0.170133	1	0.24545
ING3	-0.118054	1	-0.170317
STAT2	0.22492	1	0.324491
SIMC1	0.17899	1	0.258228
CHST1	-0.201772	1	-0.291096
AZIN2	0.187053	1	0.269861
PGAP1	-0.212589	1	-0.306701
RAB11FIP4	-0.14555	1	-0.209984
EIF4EBP2	-0.161868	1	-0.233527
NWD1	0.2265	1	0.32677
ZNF44	0.154869	1	0.223429
FAM160A2	-0.162646	1	-0.234648
RXRA	-0.238494	1	-0.344075
GSN	-0.167796	1	-0.242079
MAOA	-0.177823	1	-0.256545
CEP192	-0.201754	1	-0.291069
PLP1	-0.275225	1	-0.397065
RP11-9G1.3	-0.192058	1	-0.277081
GPATCH11	0.110921	1	0.160025
ANGPTL1	-0.115764	1	-0.167012
RNF38	0.192666	1	0.277958
SLC2A1	-0.163378	1	-0.235705
SLC24A2	-0.263707	1	-0.380448
CSNK1E	-0.19191	1	-0.276868
CASKIN2	-0.190751	1	-0.275195
DLG5	0.0960029	1	0.138503
MTSS1L	0.190527	1	0.274872
SH3TC1	-0.0952314	1	-0.13739
PTPN4	-0.207055	1	-0.298718
UGDH-AS1	0.19357	1	0.279262
USP32	0.200495	1	0.289254
STK11IP	0.0305631	1	0.0440933
IRF2	-0.21068	1	-0.303947
PFDN1	-0.191535	1	-0.276326
MAATS1	0.106673	1	0.153896
FREM2	-0.205956	1	-0.297131
SRP9	-0.187596	1	-0.270644
LINC00271	0.167745	1	0.242005
PLA2G4C	0.208654	1	0.301024
SCOC	-0.0349548	1	-0.050429
CRTC1	0.118293	1	0.17066
RABL3	-0.16199	1	-0.233703
NPC1	0.207113	1	0.298801
NUP43	0.115019	1	0.165938
AKT3	-0.165234	1	-0.238382
CTB-113D17.1	-0.200197	1	-0.288824
ATP13A5	-0.203482	1	-0.293563
RP11-384J4.2	-0.0464731	1	-0.0670465
FGFR1OP	0.164049	1	0.236673
MTA1	0.223086	1	0.321844
CTIF	-0.234921	1	-0.338919
HDAC10	-0.177695	1	-0.25636
NEIL1	0.0612616	1	0.0883818
LINC01102	-0.133761	1	-0.192977
2021-03-01	-0.254833	1	-0.367646
ZDHHC14	0.158907	1	0.229255
DAB1	0.191511	1	0.276292
LIPE	-0.122206	1	-0.176306
EDIL3	-0.239331	1	-0.345281
MT-ND4L	-0.214017	1	-0.308761
LDHB	-0.19531	1	-0.281773
EML3	0.200967	1	0.289934
SH3KBP1	-0.161052	1	-0.232349
KLHL24	-0.209942	1	-0.302882
RPL38	-0.138992	1	-0.200523
LYST	0.195751	1	0.282409
TRIM65	0.163083	1	0.235279
DDX39A	0.161496	1	0.232989
CEP78	0.13954	1	0.201314
SLC39A1	-0.119996	1	-0.173118
RAB11B	-0.215696	1	-0.311184
LINC00877	-0.0870874	1	-0.125641
TNS3	-0.195152	1	-0.281545
CASKIN1	-0.215879	1	-0.311448
GPR75-ASB3	0.0714427	1	0.10307
AMOTL2	-0.0875395	1	-0.126293
ASTN1	-0.198916	1	-0.286976
CAPN1	0.187851	1	0.271011
CCDC112	-0.150289	1	-0.216821
C19orf53	0.165425	1	0.238658
SIN3B	0.182967	1	0.263966
HEG1	0.183326	1	0.264484
ATP5J	-0.163743	1	-0.236231
SLIT2	-0.124111	1	-0.179055
CACNA2D3	0.166397	1	0.240059
LMCD1-AS1	0.0752737	1	0.108597
ASIC2	0.203368	1	0.293398
USP53	0.209481	1	0.302217
RANBP2	0.204539	1	0.295087
THOC2	0.216556	1	0.312425
UPP2	-0.233995	1	-0.337584
STAT1	0.132251	1	0.190798
NMRK1	0.0897952	1	0.129547
FBXO36	0.131433	1	0.189618
ITGB3BP	-0.16235	1	-0.234222
GPBP1	-0.203552	1	-0.293663
ZDHHC11B	-0.155504	1	-0.224345
NAPEPLD	-0.212199	1	-0.306138
TTC14	-0.190712	1	-0.27514
MOXD1	-0.225357	1	-0.325121
PLPPR2	-0.189193	1	-0.272948
PRKCA	0.110489	1	0.159402
LRIF1	-0.134248	1	-0.193679
BBS9	-0.22199	1	-0.320264
MIIP	0.185612	1	0.267782
MGAT3	-0.183462	1	-0.264679
MAPK8IP3	0.166474	1	0.240171
LINC01473	-0.21851	1	-0.315243
AC007038.7	-0.182842	1	-0.263785
LIMD1	0.14855	1	0.214312
VWA8	-0.184269	1	-0.265844
NDST1	-0.131423	1	-0.189604
RP11-468E2.1	0.0460311	1	0.0664089
ACKR3	0.257241	1	0.37112
CXCL2	0.243555	1	0.351375
SBDS	0.16019	1	0.231105
LRRC9	0.161871	1	0.23353
EIF2S2	0.187352	1	0.270291
ZNF445	0.0925946	1	0.133586
TDG	0.100481	1	0.144964
LINC00240	-0.184808	1	-0.266622
CDH23	0.190941	1	0.27547
DTX1	-0.194521	1	-0.280634
PIGX	0.13988	1	0.201804
LRRTM3	-0.0833465	1	-0.120244
KCNJ16	-0.10306	1	-0.148685
ARHGEF6	0.0594615	1	0.0857848
PVT1	0.121268	1	0.174953
ADAR	0.19298	1	0.278412
CD109	0.14458	1	0.208585
FTX	-0.146921	1	-0.211962
CD63	0.202235	1	0.291763
FAM168A	0.167163	1	0.241166
ARPC2	0.17728	1	0.255761
PDK2	-0.200142	1	-0.288743
STK4	-0.0855486	1	-0.12342
COBL	-0.214267	1	-0.309122
FAM126A	-0.182772	1	-0.263684
TTPA	-0.209565	1	-0.302338
NXPE3	-0.124074	1	-0.179002
ATP10B	-0.210274	1	-0.303361
PGGT1B	-0.166386	1	-0.240044
SPATS2	0.191937	1	0.276906
FRMPD4	0.198601	1	0.286521
MAP3K2	0.21902	1	0.315979
FBN1	0.139377	1	0.201079
ZBTB8OS	0.131394	1	0.189561
PNCK	0.146703	1	0.211648
ITGA9	-0.17661	1	-0.254794
NELFE	0.16143	1	0.232894
RP11-109P14.10	-0.181857	1	-0.262364
C17orf89	-0.15475	1	-0.223257
CTC-471J1.9	-0.191536	1	-0.276328
LAPTM4A	-0.207989	1	-0.300065
PRKRIP1	0.195821	1	0.282509
NR1D2	-0.205135	1	-0.295948
RHOQ	0.140706	1	0.202996
ADAM28	-0.0817876	1	-0.117994
FCGBP	0.0854708	1	0.123308
PLPP5	-0.184323	1	-0.265922
SIGIRR	-0.1898	1	-0.273824
GSTM3	-0.154166	1	-0.222414
CTNNA1	-0.198582	1	-0.286493
DYX1C1	0.162406	1	0.234302
DAD1	0.193831	1	0.279639
SNRK	-0.196779	1	-0.283892
CALM3	-0.187668	1	-0.270748
AES	-0.183076	1	-0.264124
GABRG2	-0.0414172	1	-0.0597524
KCNT1	-0.0584526	1	-0.0843293
C1QC	-0.0509837	1	-0.0735539
CARD11	-0.0489273	1	-0.0705872
ARID1B	-0.177007	1	-0.255367
POU3F2	-0.200861	1	-0.289781
NIN	-0.189889	1	-0.273952
NAPRT	-0.157987	1	-0.227926
TEX30	-0.0857714	1	-0.123742
FLJ16779	-0.162059	1	-0.233802
PIGL	0.0462669	1	0.066749
CTD-2537O9.1	-0.201226	1	-0.290308
HSD17B12	-0.23314	1	-0.33635
ARHGEF10	0.174202	1	0.25132
WDR60	0.146474	1	0.211318
RASSF3	0.107297	1	0.154797
LINC01125	0.080971	1	0.116816
TTLL7	-0.230409	1	-0.332411
ZNF135	0.0866891	1	0.125066
SDCCAG8	0.13214	1	0.190638
TMEM106B	-0.138023	1	-0.199125
CAMK2N1	-0.235104	1	-0.339183
TLE1	0.156647	1	0.225994
HMGN1	-0.203431	1	-0.293489
PIGP	-0.0833457	1	-0.120242
DDX3X	0.216303	1	0.31206
IMMP2L	0.170806	1	0.246421
SSBP3	0.109008	1	0.157265
CASP3	-0.149007	1	-0.214972
DIDO1	-0.18052	1	-0.260435
DDX24	0.184337	1	0.265942
RUFY1	0.143139	1	0.206506
ELP4	-0.213711	1	-0.30832
LMNA	0.185685	1	0.267886
PTP4A1	0.0852064	1	0.122927
SREBF1	-0.209796	1	-0.302672
[truncated: 8,847 more rows]

## Sheet: INTERACTOME GENE
Gene symbol
BCL6
FOS
HPSE2
JUN
JUNB
JUND
MAP1B
MFGE8
TNC
TUBB2B

## Sheet: INTERACTOME PPI
Protein A	Protein B
BCL6	JUN
FOS	JUN
TNC	JUN
BCL6	JUNB
FOS	JUNB
JUN	JUNB
BCL6	JUND
FOS	JUND
JUN	JUND
JUNB	JUND
FOS	MAP1B
JUN	MAP1B
FOS	TUBB2B
JUN	TUBB2B
JUN	MFGE8
JUN	HPSE2

## Sheet: PATHWAY ENRICHMENT
The pathway enrichment analysis is based on genes from disease network (INTERACOME GENE)
Pathway Term	# Overlapped genes	Adjusted P-value	Overlap Genes
Osteoclast differentiation	4	2.02311e-05	JUN;JUND;FOS;JUNB
IL-17 signaling pathway	3	0.000365021	JUN;JUND;FOS
TNF signaling pathway	3	0.000402918	JUN;FOS;JUNB
MAPK signaling pathway	3	0.0044116	JUN;JUND;FOS
Amphetamine addiction	2	0.0044116	JUN;FOS
B cell receptor signaling pathway	2	0.0044116	JUN;FOS
Leishmaniasis	2	0.0044116	JUN;FOS
Pertussis	2	0.0044116	JUN;FOS
Colorectal cancer	2	0.0044116	JUN;FOS
Salmonella infection	2	0.0044116	JUN;FOS
Rheumatoid arthritis	2	0.0044116	JUN;FOS
Th1 and Th2 cell differentiation	2	0.0044116	JUN;FOS
Choline metabolism in cancer	2	0.0044116	JUN;FOS
T cell receptor signaling pathway	2	0.0044116	JUN;FOS
Chagas disease (American trypanosomiasis)	2	0.0044116	JUN;FOS
Toll-like receptor signaling pathway	2	0.0044116	JUN;FOS
Parathyroid hormone synthesis, secretion and action	2	0.0044116	JUND;FOS
Th17 cell differentiation	2	0.0044116	JUN;FOS
Relaxin signaling pathway	2	0.00605261	JUN;FOS
Estrogen signaling pathway	2	0.00605261	JUN;FOS
Measles	2	0.00605261	JUN;FOS
Fluid shear stress and atherosclerosis	2	0.00605261	JUN;FOS
Apoptosis	2	0.00612216	JUN;FOS
Breast cancer	2	0.00619447	JUN;FOS
Oxytocin signaling pathway	2	0.00643346	JUN;FOS
Hepatitis B	2	0.00700519	JUN;FOS
Kaposi sarcoma-associated herpesvirus infection	2	0.00873668	JUN;FOS
Focal adhesion	2	0.00961344	JUN;TNC
Human immunodeficiency virus 1 infection	2	0.010151	JUN;FOS
cAMP signaling pathway	2	0.010151	JUN;FOS
Human T-cell leukemia virus 1 infection	2	0.010465	JUN;FOS
Glycosaminoglycan degradation	1	0.018923	HPSE2
Cocaine addiction	1	0.0470048	JUN

## Sheet: DISEASE GENE
Gene symbol (AD-associated genes)
JUN
JUND
MAP1B
FOS
MFGE8
JUNB

## Sheet: GPSnet parameter
	top 0.00010	top 0.00020	top 0.00030	top 0.00040	top 0.00050
0	75	81	93	101	101
0.1	64	57	55	56	54
0.2	49	45	45	45	43
0.3	40	38	39	38	39
0.4	37	36	35	34	33
0.5	34	34	31	30	32
0.6	34	31	29	28	28
0.7	32	29	29	26	23
0.8	30	29	28	22	22
0.9	26	27	24	15	21
