# Supplementary material for: Multimodal single-cell/nucleus RNA sequencing data analysis uncovers molecular networks between disease-associated microglia and astrocytes with implications for drug repurposing in Alzheimer's disease
Source: HighWire-hosted journal article supplement (doi:10.1101/gr.272484.120), 2021-02-24
Supplement: Supplemental_Table_S9.zip [file Supplemental_Table_S9.xlsx]

## Sheet: DESCRIPTION
Supplemental Table S9. Disease molecular network results for a human snRNA-seq dataset (GSE147528).
PATHWAY ENRICHMENT	Enrichr/Pathways/KEGG 2019 Human (FDR < 0.05)
DISEASE GENE	Enrichr/Diseases or Drugs/DisGeNET (Alzheimer's Disease, FDR < 0.05)

## Sheet: DEG
EC					SFG
Human gene symbol	avg_logFC	p_val_adj	avg_log2FC		Human gene symbol	avg_logFC	p_val_adj	avg_log2FC
A1BG	-0.00296079	1	-0.00427151		A1BG	-0.00501438	1	-0.00723422
A1BG-AS1	-0.0111827	1	-0.0161332		A1BG-AS1	-0.00359926	1	-0.00519264
A1CF	0.00263141	1	0.00379632		A1CF	0.00157593	1	0.00227358
A2M	-0.0230639	1	-0.0332742		A2M	-0.00787457	1	-0.0113606
A2M-AS1	-0.00349182	1	-0.00503763		A2M-AS1	0.000526446	1	0.000759501
A2ML1	0.0191754	1	0.0276642		A2ML1	0.0529863	1	0.0764431
A2ML1-AS1	-0.0234528	1	-0.0338353		A2ML1-AS1	-0.0149813	1	-0.0216134
A3GALT2	0.00367138	1	0.00529668		A3GALT2	5.42e-05	1	7.81941e-05
A4GALT	-0.0370283	1	-0.0534206		A4GALT	0.00125062	1	0.00180426
AAAS	0.00572797	1	0.00826371		AAAS	-0.00781627	1	-0.0112765
AACS	-0.018425	1	-0.0265817		AACS	-0.00658929	1	-0.00950634
AADAC	-0.00213003	1	-0.00307298		AADAC	0.00293187	1	0.0042298
AADACL2	0.00310675	1	0.0044821		AADAT	-0.0132885	1	-0.0191713
AADACL3	0.00272221	1	0.00392732		AAED1	0.0045982	1	0.0066338
AADACL4	0.00061381	1	0.000885541		AAGAB	-0.0189311	1	-0.0273118
AADAT	-0.0156694	1	-0.0226061		AAK1	-0.0434972	1	-0.0627531
AAED1	-0.00491157	1	-0.0070859		AAMDC	0.00359972	1	0.0051933
AAGAB	-0.00735704	1	-0.010614		AAMP	0.00080138	1	0.00115615
AAK1	-0.0265138	1	-0.0382514		AANAT	-0.000778526	1	-0.00112318
AAMDC	-0.0360917	1	-0.0520694		AAR2	-0.0168432	1	-0.0242995
AAMP	0.0119252	1	0.0172045		AARD	-0.000989026	1	-0.00142686
AANAT	-0.00535918	1	-0.00773166		AARS	-0.0207927	1	-0.0299975
AAR2	-0.00854748	1	-0.0123314		AARS2	-0.00199823	1	-0.00288284
AARD	0.00544286	1	0.00785239		AASDH	0.0330511	1	0.0476827
AARS	0.00388351	1	0.00560272		AASDHPPT	-0.00924286	1	-0.0133346
AARS2	-0.00251188	1	-0.00362387		AASS	-0.0291253	1	-0.0420189
AASDH	0.0245949	1	0.0354829		AATF	-0.0154558	1	-0.0222981
AASDHPPT	-0.0188046	1	-0.0271294		AATK	-0.0902567	0.717335	-0.130213
AASS	-0.108702	1	-0.156824		AATK-AS1	-0.0011813	1	-0.00170426
AATF	-0.0111032	1	-0.0160185		ABAT	0.0309414	1	0.0446389
AATK	-0.0173876	1	-0.0250851		ABCA1	0.0832241	0.572891	0.120067
AATK-AS1	-0.00101485	1	-0.00146412		ABCA10	0.00138325	1	0.0019956
ABAT	-0.0208156	1	-0.0300306		ABCA12	0.00754959	1	0.0108918
ABCA1	0.0140151	1	0.0202195		ABCA13	-0.00638734	1	-0.00921498
ABCA10	-0.0158314	1	-0.0228399		ABCA2	-0.0475523	1	-0.0686034
ABCA12	-0.0126897	1	-0.0183074		ABCA3	0.00398637	1	0.00575111
ABCA13	0.0279703	1	0.0403526		ABCA4	-0.0106495	1	-0.015364
ABCA2	0.0589484	1	0.0850446		ABCA5	0.0191252	1	0.0275918
ABCA3	-0.00297324	1	-0.00428948		ABCA6	-0.00224444	1	-0.00323804
ABCA4	-0.00443415	1	-0.00639713		ABCA7	0.00652439	1	0.0094127
ABCA5	0.0324951	1	0.0468805		ABCA8	-0.00468281	1	-0.00675586
ABCA6	-0.00282508	1	-0.00407573		ABCA9	0.00267713	1	0.00386228
ABCA7	-0.0341743	1	-0.049303		ABCB1	-0.0121251	1	-0.0174928
ABCA8	0.00358931	1	0.00517828		ABCB10	-0.0308436	1	-0.0444979
ABCA9	-0.0116265	1	-0.0167734		ABCB11	-0.00139868	1	-0.00201787
ABCB1	-0.0687938	1	-0.0992485		ABCB4	-0.000712305	1	-0.00102764
ABCB10	0.00011126	1	0.000160514		ABCB5	-0.00442629	1	-0.00638579
ABCB11	0.00497387	1	0.00717578		ABCB6	-0.000235219	1	-0.000339349
ABCB4	0.000570217	1	0.000822649		ABCB7	0.0133169	1	0.0192122
ABCB5	-0.0165074	1	-0.0238151		ABCB8	-0.0169356	1	-0.0244329
ABCB7	-0.0424279	1	-0.0612105		ABCB9	-0.0392771	1	-0.0566649
ABCB8	-0.0267239	1	-0.0385544		ABCC1	0.0351956	1	0.0507766
ABCB9	-0.0345306	1	-0.0498172		ABCC10	0.0395381	1	0.0570414
ABCC1	-0.00929926	1	-0.013416		ABCC11	-0.00249521	1	-0.00359982
ABCC10	0.0164138	1	0.0236801		ABCC12	-6.68e-05	1	-9.6372e-05
ABCC11	-0.00605668	1	-0.00873794		ABCC2	0.00658127	1	0.00949477
ABCC12	-0.00562835	1	-0.00811999		ABCC3	0.0025109	1	0.00362246
ABCC2	0.00149763	1	0.00216062		ABCC4	0.175134	1.89e-20	0.252665
ABCC3	0.038958	1	0.0562046		ABCC5	0.0270211	1	0.0389832
ABCC4	0.100919	4.29e-08	0.145596		ABCC6	0.00541749	1	0.00781579
ABCC5	0.026197	1	0.0377942		ABCC8	-0.0208368	1	-0.0300612
ABCC5-AS1	-0.000625724	1	-0.000902729		ABCC9	0.0745423	1	0.107542
ABCC6	0.0109984	1	0.0158673		ABCD1	-0.0184775	1	-0.0266574
ABCC8	0.0337159	1	0.0486418		ABCD2	-0.101341	1.8e-07	-0.146205
ABCC9	-0.074463	1	-0.107427		ABCD3	-0.0407832	1	-0.0588377
ABCD1	-0.0069048	1	-0.00996151		ABCD4	0.00241835	1	0.00348894
ABCD2	-0.038045	1	-0.0548873		ABCE1	-0.0136314	1	-0.0196659
ABCD3	0.0115024	1	0.0165944		ABCF1	-0.00900686	1	-0.0129942
ABCD4	-0.0819391	1	-0.118213		ABCF2	-0.000936118	1	-0.00135053
ABCE1	0.0191135	1	0.027575		ABCG1	-0.00306586	1	-0.0044231
ABCF1	0.00178492	1	0.00257509		ABCG2	0.00683292	1	0.00985781
ABCF2	-0.0195188	1	-0.0281597		ABCG4	-0.0109278	1	-0.0157655
ABCG1	-0.000393688	1	-0.000567972		ABCG5	0.00246126	1	0.00355084
ABCG2	-0.000132586	1	-0.000191281		ABCG8	-0.000398853	1	-0.000575423
ABCG4	-0.00263042	1	-0.0037949		ABHD1	-0.0138912	1	-0.0200408
ABCG5	-0.00391201	1	-0.00564384		ABHD10	-0.0220542	1	-0.0318175
ABCG8	0.00327233	1	0.00472097		ABHD11	-0.0305434	1	-0.0440648
ABHD1	-0.0214899	1	-0.0310034		ABHD12	-0.000363787	1	-0.000524834
ABHD10	-0.0145046	1	-0.0209256		ABHD12B	0.00303498	1	0.00437854
ABHD11	-0.0105001	1	-0.0151484		ABHD13	4.83e-05	1	6.96822e-05
ABHD12	0.00613016	1	0.00884395		ABHD14A	0.00267738	1	0.00386264
ABHD12B	-0.00482369	1	-0.00695911		ABHD14A-ACY1	0.00173325	1	0.00250055
ABHD13	-0.00806753	1	-0.011639		ABHD14B	-0.00413016	1	-0.00595856
ABHD14A	-0.00920141	1	-0.0132748		ABHD15	-0.00693983	1	-0.0100121
ABHD14A-ACY1	0.00541985	1	0.0078192		ABHD16A	-0.00274936	1	-0.00396648
ABHD14B	-0.0110233	1	-0.0159033		ABHD17A	-0.0634398	1	-0.0915243
ABHD15	-0.00796269	1	-0.0114877		ABHD17B	-0.00912869	1	-0.0131699
ABHD16A	-8.62e-05	1	-0.00012436		ABHD17C	0.0154243	1	0.0222526
ABHD17A	-0.018665	1	-0.0269279		ABHD2	-0.138936	0.0115901	-0.200442
ABHD17B	-0.0214706	1	-0.0309755		ABHD3	-0.0380622	1	-0.0549122
ABHD17C	-0.0316747	1	-0.0456969		ABHD4	-0.000991981	1	-0.00143113
ABHD2	-0.129465	1	-0.186778		ABHD5	-0.0159481	1	-0.0230082
ABHD3	-0.0165556	1	-0.0238847		ABHD6	0.0124935	1	0.0180242
ABHD4	-0.00343343	1	-0.00495339		ABHD8	-0.0587854	1	-0.0848094
ABHD5	-0.0392219	1	-0.0565852		ABI1	-0.0686014	1	-0.0989709
ABHD6	0.0258516	1	0.0372959		ABI2	0.000153279	1	0.000221135
ABHD8	-0.021554	1	-0.0310958		ABI3	0.00323305	1	0.00466431
ABI1	-0.0205753	1	-0.0296839		ABI3BP	0.134858	1.04e-21	0.194558
ABI2	0.118605	1	0.171111		ABL1	-0.0629595	1	-0.0908314
ABI3	-0.00323995	1	-0.00467426		ABL2	-0.0234282	1	-0.0337998
ABI3BP	0.1779	2.87e-07	0.256656		ABLIM1	0.0725007	1	0.104596
ABL1	0.038467	0.392974	0.0554961		ABLIM2	-0.0163073	1	-0.0235264
ABL2	0.0180846	1	0.0260905		ABLIM3	-0.0295585	1	-0.0426439
ABLIM1	0.0577806	1	0.0833598		ABO	0.00444077	1	0.00640667
ABLIM2	-0.0215407	1	-0.0310767		ABR	0.264215	1.12e-12	0.381181
ABLIM3	0.0208435	1	0.0300708		ABRA	0.000587161	1	0.000847094
ABO	-0.00321884	1	-0.0046438		ABRACL	0.0122083	1	0.0176128
ABR	0.326868	4.39e-13	0.471571		ABT1	0.0123815	1	0.0178628
ABRA	-0.000655521	1	-0.000945717		ABTB1	-0.029728	1	-0.0428884
ABRACL	-0.00476728	1	-0.00687773		ABTB2	0.000599688	1	0.000865167
ABT1	0.0194943	1	0.0281244		ACAA1	0.040571	1	0.0585316
ABTB1	-0.0293653	1	-0.0423652		ACAA2	-0.00894234	1	-0.0129011
ABTB2	-0.0470565	1	-0.0678881		ACACA	-0.0844015	1	-0.121766
ACAA1	-0.00589235	1	-0.00850086		ACACB	-0.000774423	1	-0.00111726
ACAA2	-0.00794239	1	-0.0114584		ACAD10	0.0089104	1	0.012855
ACACA	0.0754173	1	0.108804		ACAD11	0.006933	1	0.0100022
ACACB	0.0128655	0.0360138	0.018561		ACAD8	0.0325972	1	0.0470279
ACAD10	0.0101788	1	0.0146848		ACAD9	0.0473321	1	0.0682857
ACAD11	-0.000700689	1	-0.00101088		ACADL	0.00336323	1	0.00485211
ACAD8	0.0166446	1	0.0240131		ACADM	0.00143286	1	0.00206718
ACAD9	-0.0107048	1	-0.0154437		ACADS	0.00254029	1	0.00366487
ACADL	-0.00883517	1	-0.0127465		ACADSB	-0.0205911	1	-0.0297067
ACADM	0.0344306	1	0.0496729		ACADVL	-0.0143113	1	-0.0206469
ACADS	-0.0458888	1	-0.0662036		ACAN	-0.000887681	1	-0.00128065
ACADSB	-0.000196352	1	-0.000283276		ACAP1	0.01247	1	0.0179905
ACADVL	0.020766	0.918402	0.029959		ACAP2	0.0172378	1	0.0248689
ACAN	0.00218289	1	0.00314924		ACAP3	-0.0599918	1	-0.0865498
ACAP1	-0.00326839	1	-0.00471529		ACAT1	0.0360607	1	0.0520246
ACAP2	-0.0405683	1	-0.0585277		ACAT2	-0.0145885	1	-0.0210467
ACAP3	-0.0570549	1	-0.0823128		ACBD3	0.0231565	1	0.0334077
ACAT1	0.0409029	1	0.0590104		ACBD4	-0.00128827	1	-0.00185858
ACAT2	-0.0170508	1	-0.0245992		ACBD5	-0.000395382	1	-0.000570416
ACBD3	0.0127733	1	0.0184279		ACBD6	0.0221331	1	0.0319313
ACBD4	0.00157862	1	0.00227747		ACBD7	-0.0113773	1	-0.016414
ACBD5	0.0217017	1	0.031309		ACCS	-0.0260207	1	-0.0375399
ACBD6	0.0443054	1	0.0639192		ACCSL	-0.00128019	1	-0.00184693
ACBD7	-0.00537203	1	-0.00775021		ACD	0.00511326	1	0.00737687
ACCS	-0.00792217	1	-0.0114293		ACE	0.0010426	1	0.00150415
ACCSL	-0.00838125	1	-0.0120916		ACE2	-0.00114186	1	-0.00164736
ACD	-0.00728516	1	-0.0105103		ACER1	0.0072479	1	0.0104565
ACE	0.00512853	1	0.00739891		ACER2	0.000374408	1	0.000540157
ACE2	-0.00261544	1	-0.00377328		ACER3	-0.0526919	1	-0.0760183
ACER1	-0.000230911	1	-0.000333134		ACHE	0.0283786	1	0.0409416
ACER2	-0.00241452	1	-0.00348341		ACIN1	-0.0190322	1	-0.0274576
ACER3	-0.0706802	1	-0.10197		ACLY	6.3e-05	1	9.08898e-05
ACHE	0.00925333	1	0.0133497		ACMSD	-0.00597311	1	-0.00861737
ACIN1	0.0338547	1	0.0488421		ACO1	-0.010276	1	-0.0148251
ACLY	-0.00849822	1	-0.0122603		ACO2	0.0981229	1.58e-05	0.141561
ACMSD	-0.00500465	1	-0.00722018		ACOT1	-0.00656238	1	-0.00946752
ACO1	-0.0417046	1	-0.060167		ACOT11	0.071789	0.219668	0.10357
ACO2	0.0533796	0.0829985	0.0770104		ACOT12	-0.00219717	1	-0.00316985
ACOT1	-0.0105705	1	-0.0152499		ACOT13	0.0219468	1	0.0316625
ACOT11	0.07405	1	0.106832		ACOT2	-0.010989	1	-0.0158538
ACOT12	0.0032026	1	0.00462037		ACOT4	-0.00218115	1	-0.00314673
ACOT13	-0.00511429	1	-0.00737836		ACOT6	-0.0100983	1	-0.0145688
ACOT2	-0.000468548	1	-0.000675972		ACOT7	-0.0159887	1	-0.0230669
ACOT4	-0.00308987	1	-0.00445774		ACOT8	0.00226475	1	0.00326735
ACOT6	-0.0117977	1	-0.0170204		ACOT9	0.00354833	1	0.00511915
ACOT7	-0.0320185	1	-0.0461929		ACOX1	-0.0434494	1	-0.0626843
ACOT8	-0.0194171	1	-0.028013		ACOX2	0.0054532	1	0.0078673
ACOT9	0.00659986	1	0.00952158		ACOX3	0.00807527	1	0.0116502
ACOX1	-0.0789561	1	-0.11391		ACOXL	-0.0103929	1	-0.0149938
ACOX2	0.0257637	1	0.0371692		ACP1	-0.00913867	1	-0.0131843
ACOX3	0.00885141	1	0.0127699		ACP2	-0.0226328	1	-0.0326522
ACOXL	0.00981129	1	0.0141547		ACP5	0.0203378	1	0.0293412
ACP1	0.00649298	1	0.00936738		ACP6	-0.0178949	1	-0.0258169
ACP2	0.0126749	1	0.018286		ACPP	0.0114427	1	0.0165083
ACP5	0.00884206	1	0.0127564		ACR	0.000713516	1	0.00102939
ACP6	-0.0154665	1	-0.0223134		ACRBP	0.00152009	1	0.00219303
ACPP	0.00458871	1	0.00662011		ACRC	0.00788178	1	0.011371
ACPT	0.00531885	1	0.00767347		ACRV1	0.00134108	1	0.00193477
ACR	-0.000100456	1	-0.000144927		ACSBG1	-0.124872	0.832065	-0.180152
ACRBP	-0.00185284	1	-0.00267308		ACSBG2	-0.000105767	1	-0.00015259
ACRC	-0.00706477	1	-0.0101923		ACSF2	-0.0218562	1	-0.0315319
ACRV1	0.0133483	1	0.0192576		ACSF3	-0.0112655	1	-0.0162527
ACSBG1	-0.0451334	1	-0.0651137		ACSL1	0.0315453	1	0.0455102
ACSBG2	-0.0019503	1	-0.00281369		ACSL3	-0.144746	0.0105053	-0.208824
ACSF2	-0.0146018	1	-0.0210659		ACSL4	0.00156043	1	0.00225122
ACSF3	0.00732332	1	0.0105653		ACSL5	0.014057	1	0.02028
ACSL1	-0.00391786	1	-0.00565228		ACSL6	-0.00945822	1	-0.0136453
ACSL3	-0.101748	1	-0.146792		ACSM1	-0.00405264	1	-0.00584673
ACSL4	-0.0393435	1	-0.0567607		ACSM2A	-0.00251937	1	-0.00363469
ACSL5	-0.0205717	1	-0.0296787		ACSM2B	0.0028942	1	0.00417544
ACSL6	-0.00215102	1	-0.00310327		ACSM3	-0.0036066	1	-0.00520322
ACSM1	-0.00104423	1	-0.00150651		ACSM4	-0.00048001	1	-0.000692508
ACSM2A	-0.0017728	1	-0.00255761		ACSM5	0.00147031	1	0.00212121
ACSM2B	-0.000920478	1	-0.00132797		ACSS1	-0.239268	1.21e-08	-0.34519
ACSM3	-0.0195893	1	-0.0282614		ACSS2	-0.0086817	1	-0.012525
ACSM4	0.00948982	1	0.0136909		ACSS3	-0.0504463	1	-0.0727786
ACSM5	0.00698592	1	0.0100786		ACTA1	-0.000868914	1	-0.00125358
ACSS1	0.0058864	1	0.00849228		ACTA2	0.0100234	1	0.0144607
ACSS2	-0.0108868	1	-0.0157063		ACTB	0.0724909	1	0.104582
ACSS3	-0.0514975	1	-0.0742952		ACTC1	0.000178733	1	0.000257857
ACTA1	0.00514111	1	0.00741705		ACTG1	0.0844798	1	0.121879
ACTA2	0.000687857	1	0.000992368		ACTG2	-0.00212577	1	-0.00306683
ACTB	0.0510902	1	0.0737075		ACTL6A	-0.00557698	1	-0.00804589
ACTC1	-0.0043338	1	-0.00625235		ACTL6B	0.0117212	1	0.0169101
ACTG1	0.160374	1	0.23137		ACTL8	-0.000848667	1	-0.00122437
ACTG2	-0.00116087	1	-0.00167479		ACTN1	0.120111	3.32e-07	0.173284
ACTL6A	-0.00592491	1	-0.00854783		ACTN2	0.0706391	0.749509	0.101911
ACTL6B	-0.00312267	1	-0.00450506		ACTN3	-0.00138728	1	-0.00200141
ACTN1	-0.0142712	1	-0.0205889		ACTN4	-0.0292988	1	-0.0422693
ACTN1-AS1	-0.00139533	1	-0.00201304		ACTR10	-0.0125052	1	-0.0180412
ACTN2	0.0435583	0.0205633	0.0628414		ACTR1A	-0.0299542	1	-0.0432148
ACTN3	-0.00292317	1	-0.00421725		ACTR1B	-0.0123962	1	-0.017884
ACTN4	-0.0688807	1	-0.0993739		ACTR2	-0.0312223	1	-0.0450443
ACTR10	0.00770268	1	0.0111126		ACTR3	5.93e-05	1	8.55518e-05
ACTR1A	-0.0574667	1	-0.0829069		ACTR3B	-0.0152884	1	-0.0220565
ACTR1B	-0.0300786	1	-0.0433943		ACTR3C	0.00830081	1	0.0119755
ACTR2	-0.0189312	1	-0.0273119		ACTR5	-0.0157696	1	-0.0227508
ACTR3	-0.0247643	1	-0.0357274		ACTR6	-0.016444	1	-0.0237236
ACTR3B	0.0644506	1	0.0929826		ACTR8	-0.0121904	1	-0.0175871
ACTR3C	0.0230732	1	0.0332876		ACTRT3	6.13e-05	1	8.84372e-05
ACTR5	0.0181796	1	0.0262276		ACVR1	0.00250734	1	0.00361733
ACTR6	-0.000799164	1	-0.00115295		ACVR1B	0.013588	1	0.0196033
ACTR8	-0.0195728	1	-0.0282376		ACVR1C	0.00406781	1	0.0058686
ACTRT3	0.000506309	1	0.000730449		ACVR2A	-0.0309078	1	-0.0445905
ACVR1	-0.0464008	1	-0.0669422		ACVR2B	-0.000441193	1	-0.000636507
ACVR1B	-0.00147002	1	-0.0021208		ACVR2B-AS1	-0.00174013	1	-0.00251048
ACVR1C	0.0134882	1	0.0194594		ACVRL1	-0.000388157	1	-0.000559992
ACVR2A	0.0425951	1	0.0614517		ACY1	-0.00731233	1	-0.0105495
ACVR2B	-0.0154193	1	-0.0222453		ACYP1	-0.00234816	1	-0.00338768
ACVR2B-AS1	-0.00166655	1	-0.00240432		ACYP2	-0.00178527	1	-0.0025756
ACVRL1	0.0020372	1	0.00293906		ADA	-0.0229804	1	-0.0331537
ACY1	-0.00460056	1	-0.0066372		ADAD2	-0.000973091	1	-0.00140387
ACY3	8.09e-05	1	0.000116714		ADAL	0.00757757	1	0.0109321
ACYP1	-0.027296	1	-0.0393798		ADAM10	-0.0312058	1	-0.0450204
ACYP2	0.0269141	1	0.0388288		ADAM11	-0.0578725	1	-0.0834924
ADA	0.0165413	1	0.0238641		ADAM12	-0.0317122	1	-0.0457511
ADAD2	-0.00254878	1	-0.00367711		ADAM15	-0.0121019	1	-0.0174593
ADAL	-0.0142077	1	-0.0204974		ADAM17	-0.00348614	1	-0.00502943
ADAM10	0.0238674	1	0.0344333		ADAM18	-0.00371787	1	-0.00536376
ADAM11	-0.00949559	1	-0.0136992		ADAM19	0.0123672	1	0.0178422
ADAM12	-0.0535462	1	-0.0772508		ADAM2	-0.000276946	1	-0.000399549
ADAM15	-0.0300651	1	-0.0433748		ADAM22	-0.00498583	1	-0.00719303
ADAM17	-0.0325624	1	-0.0469776		ADAM23	-0.00853343	1	-0.0123111
ADAM18	-0.00937173	1	-0.0135205		ADAM28	0.00284951	1	0.00411098
ADAM19	0.0268109	1	0.0386799		ADAM29	0.0161024	1	0.0232308
ADAM2	-0.00208177	1	-0.00300335		ADAM32	0.0145977	1	0.0210601
ADAM21	-0.00165947	1	-0.00239411		ADAM33	-0.0757563	0.357486	-0.109293
ADAM22	0.0436619	1	0.0629908		ADAM7	0.00219505	1	0.00316679
ADAM23	0.0159774	1	0.0230505		ADAM8	-0.00306403	1	-0.00442046
ADAM28	0.00657137	1	0.00948048		ADAM9	0.000198297	1	0.000286082
ADAM29	0.00308808	1	0.00445515		ADAMDEC1	-0.00223448	1	-0.00322367
ADAM32	-0.00131876	1	-0.00190257		ADAMTS1	-0.00313618	1	-0.00452456
ADAM33	-0.0522198	1	-0.0753373		ADAMTS10	-0.0925595	1	-0.133535
ADAM7	-0.00297301	1	-0.00428915		ADAMTS12	0.0165751	1	0.0239129
ADAM8	0.000795816	1	0.00114812		ADAMTS13	-0.0100814	1	-0.0145443
ADAM9	0.0384868	1	0.0555247		ADAMTS14	-0.00369279	1	-0.00532757
ADAMDEC1	0.0011067	1	0.00159663		ADAMTS15	0.0010004	1	0.00144327
ADAMTS1	-0.0023758	1	-0.00342755		ADAMTS16	0.00288166	1	0.00415736
ADAMTS10	-0.118721	1	-0.171278		ADAMTS17	-0.119577	0.989788	-0.172513
ADAMTS12	-0.000442054	1	-0.000637749		ADAMTS18	0.0214239	1	0.0309081
ADAMTS13	0.0358801	1	0.0517641		ADAMTS19	-0.0136227	1	-0.0196534
ADAMTS14	0.00238045	1	0.00343426		ADAMTS2	0.00289524	1	0.00417695
ADAMTS15	-0.00414706	1	-0.00598294		ADAMTS20	-0.00580793	1	-0.00837908
ADAMTS16	0.0035259	1	0.0050868		ADAMTS3	0.0254959	1	0.0367829
ADAMTS17	-0.129021	1	-0.186138		ADAMTS4	-0.0110598	1	-0.0159559
ADAMTS18	-0.00100352	1	-0.00144777		ADAMTS5	0.00701701	1	0.0101234
ADAMTS19	0.0119043	1	0.0171743		ADAMTS6	0.0415148	1	0.0598931
ADAMTS2	-0.0158023	1	-0.0227978		ADAMTS7	0.0101447	1	0.0146357
ADAMTS20	-0.00969453	1	-0.0139862		ADAMTS8	0.00498153	1	0.00718682
ADAMTS3	0.0130351	1	0.0188057		ADAMTS9	0.244843	3.46e-39	0.353234
ADAMTS4	0.0187678	1	0.0270762		ADAMTS9-AS1	0.0124847	1	0.0180117
ADAMTS5	0.000734977	1	0.00106035		ADAMTS9-AS2	0.219211	1.36e-22	0.316255
ADAMTS6	-0.0102615	1	-0.0148042		ADAMTSL1	-0.0156324	1	-0.0225528
ADAMTS7	-0.00251559	1	-0.00362923		ADAMTSL2	-0.0214795	1	-0.0309884
ADAMTS8	0.00132808	1	0.00191601		ADAMTSL3	0.375546	8.54e-70	0.541799
ADAMTS9	0.303927	3.37e-24	0.438474		ADAMTSL4	0.00188191	1	0.00271502
ADAMTS9-AS1	-0.00578455	1	-0.00834535		ADAMTSL5	-0.0160542	1	-0.0231613
ADAMTS9-AS2	0.11196	0.903922	0.161525		ADAP1	-0.0360298	1	-0.05198
ADAMTSL1	0.0436248	1	0.0629372		ADAP2	0.0268621	1	0.0387538
ADAMTSL2	-0.0300541	1	-0.0433589		ADAR	-0.0102169	1	-0.0147398
ADAMTSL3	0.209889	2.46e-13	0.302806		ADARB1	-0.00372507	1	-0.00537414
ADAMTSL4	-0.0108928	1	-0.015715		ADARB2	-0.0578238	1	-0.0834221
ADAMTSL5	-0.00495378	1	-0.00714679		ADARB2-AS1	0.000975298	1	0.00140706
ADAP1	0.0218183	1	0.0314772		ADAT1	0.00956728	1	0.0138027
ADAP2	0.0359578	1	0.0518762		ADAT2	0.0159477	1	0.0230076
ADAR	-0.0340694	1	-0.0491518		ADCK1	0.00467987	1	0.00675162
ADARB1	0.0118149	1	0.0170453		ADCK2	0.0040573	1	0.00585345
ADARB2	0.0568409	1	0.082004		ADCK3	0.000262495	1	0.0003787
ADARB2-AS1	-0.00421382	1	-0.00607925		ADCK4	0.000825398	1	0.0011908
ADAT1	0.0147189	1	0.0212348		ADCK5	-0.0237622	1	-0.0342817
ADAT2	-0.00240896	1	-0.0034754		ADCY1	0.0493636	1	0.0712166
ADCK1	-0.0174169	1	-0.0251273		ADCY10	0.016438	1	0.023715
ADCK2	0.00132112	1	0.00190598		ADCY2	0.256435	5.04e-12	0.369958
ADCK3	0.00949911	1	0.0137043		ADCY3	-0.0231058	1	-0.0333347
ADCK4	-0.0525306	1	-0.0757856		ADCY4	0.000828771	1	0.00119566
ADCK5	-0.000520361	1	-0.000750722		ADCY5	-0.0320538	1	-0.0462438
ADCY1	0.0788544	1	0.113763		ADCY6	0.00908625	1	0.0131087
ADCY10	-0.0146058	1	-0.0210717		ADCY7	0.0171885	1	0.0247977
ADCY2	-0.0129124	1	-0.0186287		ADCY8	0.232099	1.94e-20	0.334848
ADCY3	-0.0543028	1	-0.0783423		ADCY9	0.0312444	1	0.0450761
ADCY4	0.00253534	1	0.00365772		ADCYAP1	-0.0116732	1	-0.0168408
ADCY5	-0.0368482	1	-0.0531608		ADCYAP1R1	-0.0249688	1	-0.0360224
ADCY6	-0.000590413	1	-0.000851786		ADD1	-0.00878434	1	-0.0126731
ADCY7	-0.0121526	1	-0.0175325		ADD2	-0.052967	1	-0.0764152
ADCY8	0.044152	0.317582	0.0636978		ADD3	0.0440495	1	0.06355
ADCY9	-0.0395714	1	-0.0570894		ADGB	0.00245403	1	0.00354042
ADCYAP1	-0.00433023	1	-0.00624721		ADH1B	0.00176915	1	0.00255234
ADCYAP1R1	0.0308957	1	0.0445731		ADH1C	-0.00114543	1	-0.00165251
ADD1	0.0618403	1	0.0892167		ADH4	-0.00464256	1	-0.0066978
ADD2	-0.00864134	1	-0.0124668		ADH5	0.00581285	1	0.00838617
ADD3	0.0378059	1	0.0545423		ADH6	-4.07e-06	1	-5.87177e-06
ADGB	-0.0249686	1	-0.036022		ADHFE1	-0.000651253	1	-0.000939559
ADH1C	-0.00513488	1	-0.00740806		ADI1	-0.0127651	1	-0.0184161
ADH4	-0.00221149	1	-0.00319051		ADIG	0.00087691	1	0.00126511
ADH5	0.00931816	1	0.0134433		ADIPOQ	-0.0016278	1	-0.00234842
ADH6	-0.00285328	1	-0.00411641		ADIPOR1	-0.0027785	1	-0.00400853
ADHFE1	0.00232143	1	0.00334912		ADIPOR2	0.00442924	1	0.00639005
ADI1	0.00878536	1	0.0126746		ADIRF	0.0716686	0.0029081	0.103396
ADIPOQ	-0.0018418	1	-0.00265715		ADK	0.049088	1	0.0708191
ADIPOR1	-0.012105	1	-0.0174638		ADM	0.0663653	1	0.0957449
ADIPOR2	-0.0158338	1	-0.0228433		ADM5	0.000919887	1	0.00132712
ADIRF	-0.0329735	1	-0.0475707		ADNP	-0.000676161	1	-0.000975494
ADK	0.0366928	1	0.0529365		ADNP2	-0.0158694	1	-0.0228947
ADM	0.0587015	1	0.0846883		ADO	0.0120329	1	0.0173599
ADM5	0.00573158	1	0.00826892		ADORA1	-0.10124	1	-0.146059
ADNP	-0.0411777	1	-0.0594068		ADORA2A-AS1	-0.00181936	1	-0.00262479
ADNP2	-0.0308085	1	-0.0444472		ADORA2B	-0.0579585	1	-0.0836165
ADO	-0.0101251	1	-0.0146074		ADPGK	-0.0121689	1	-0.0175559
ADORA1	-0.0422703	1	-0.0609831		ADPGK-AS1	-0.0540285	0.0772632	-0.0779466
ADORA2A-AS1	0.00953593	1	0.0137574		ADPRH	0.00030881	1	0.000445519
ADORA2B	-0.00556134	1	-0.00802331		ADPRHL1	0.00485624	1	0.00700608
ADPGK	0.0008153	1	0.00117623		ADPRHL2	0.00448053	1	0.00646404
ADPGK-AS1	-0.0140362	1	-0.0202499		ADPRM	0.008631	1	0.0124519
ADPRH	-0.00168396	1	-0.00242943		ADRA1A	0.0621546	1	0.0896701
ADPRHL1	-0.00801947	1	-0.0115697		ADRA1B	-0.0231561	1	-0.0334072
ADPRHL2	-0.0219747	1	-0.0317028		ADRA1D	0.0113387	1	0.0163583
ADPRM	-0.00420398	1	-0.00606506		ADRA2A	-0.00259105	1	-0.0037381
ADRA1A	0.041161	0.000311368	0.0593827		ADRA2B	-0.00637108	1	-0.00919153
ADRA1B	-0.0105754	1	-0.0152571		ADRA2C	0.00662662	1	0.0095602
ADRA1D	0.000479612	1	0.000691934		ADRB1	-0.0678362	0.0879488	-0.0978669
ADRA2A	-0.00284188	1	-0.00409997		ADRB2	0.0062279	1	0.00898497
ADRA2C	-0.00537342	1	-0.0077522		ADRBK1	0.0206831	1	0.0298394
ADRB1	-0.0628071	1	-0.0906115		ADRBK2	-0.0397195	1	-0.0573031
ADRB2	-0.00388551	1	-0.00560561		ADRM1	-0.0137845	1	-0.0198868
ADRBK1	0.0780397	1	0.112588		ADSL	-0.0158094	1	-0.0228082
ADRBK2	-0.0591084	1	-0.0852754		ADSS	0.000657792	1	0.000948993
ADRM1	-0.0146078	1	-0.0210746		ADSSL1	-0.0107594	1	-0.0155226
ADSL	0.0144664	1	0.0208705		ADTRP	0.00117551	1	0.0016959
ADSS	-0.0164423	1	-0.0237213		AEBP1	0.340889	1.33e-27	0.491799
ADSSL1	0.0162108	1	0.0233872		AEBP2	0.025927	1	0.0374048
ADTRP	-0.0134272	1	-0.0193714		AEN	-0.00311371	1	-0.00449213
AEBP1	0.0599336	1	0.0864659		AES	-0.0609302	1	-0.0879037
AEBP2	0.0764733	1	0.110328		AFAP1	0.000634697	1	0.000915674
AEN	-0.00587952	1	-0.00848235		AFAP1-AS1	-0.00125596	1	-0.00181197
AES	0.0434014	1	0.062615		AFAP1L1	0.00365732	1	0.0052764
AFAP1	-0.0208409	1	-0.030067		AFAP1L2	0.00135302	1	0.00195199
AFAP1L1	0.000810095	1	0.00116872		AFF1	0.126898	0.0182762	0.183075
AFAP1L2	-0.00361328	1	-0.00521287		AFF2	-0.00431337	1	-0.00622287
AFF1	-0.049071	1	-0.0707945		AFF3	0.0181417	1	0.026173
AFF2	-0.00587353	1	-0.00847371		AFF4	0.0225122	1	0.0324782
AFF3	-0.00634991	1	-0.00916098		AFG3L2	-0.0145752	1	-0.0210275
AFF4	-0.088098	1	-0.127099		AFMID	-0.0143385	1	-0.0206861
AFG3L2	-0.00101351	1	-0.00146218		AFP	-0.00161742	1	-0.00233344
AFM	0.00319937	1	0.00461571		AFTPH	0.054394	1	0.0784739
AFMID	-0.00597955	1	-0.00862667		AGA	-0.00371559	1	-0.00536046
AFP	-0.00995163	1	-0.0143572		AGAP1	-0.0585408	1	-0.0844565
AFTPH	-0.0420098	1	-0.0606073		AGAP2	-0.023511	1	-0.0339191
AGA	-0.00172028	1	-0.00248184		AGAP3	-0.0384464	1	-0.0554665
AGAP1	0.0177056	1	0.0255438		AGAP4	0.0339386	1	0.048963
AGAP2	-0.0399984	1	-0.0577055		AGAP5	0.00124573	1	0.00179721
AGAP2-AS1	-0.00219295	1	-0.00316376		AGAP6	0.0167069	1	0.024103
AGAP3	0.0359661	1	0.0518881		AGAP9	0.0364499	1	0.0525861
AGAP4	0.0876753	1	0.126489		AGBL1	-0.0814806	1	-0.117552
AGAP5	0.00726893	1	0.0104869		AGBL2	0.00381404	1	0.0055025
AGAP6	0.041516	1	0.0598949		AGBL3	-0.0149016	1	-0.0214984
AGAP9	0.0298861	1	0.0431165		AGBL4	0.0099001	1	0.0142828
AGBL1	0.0300933	1	0.0434154		AGBL5	-0.0127898	1	-0.0184517
AGBL2	0.00159245	1	0.00229743		AGER	0.0147317	1	0.0212533
AGBL3	-0.0306914	1	-0.0442783		AGFG1	-0.0069555	1	-0.0100347
AGBL4	0.0895009	1	0.129123		AGFG2	0.0499756	0.153558	0.0720996
AGBL5	-0.0348506	1	-0.0502789		AGGF1	0.0211827	1	0.0305601
AGER	0.0411013	1	0.0592967		AGK	0.00472979	1	0.00682364
AGFG1	-0.0423999	1	-0.0611701		AGL	0.051427	1	0.0741935
AGFG2	0.0512357	0.259672	0.0739175		AGMAT	0.00119714	1	0.00172711
AGGF1	-0.000529334	1	-0.000763668		AGMO	0.0334086	1	0.0481984
AGK	-0.0015256	1	-0.00220098		AGO1	0.00106441	1	0.00153563
AGL	0.0352026	0.267984	0.0507866		AGO2	0.0412843	1	0.0595606
AGMAT	-0.00688953	1	-0.00993949		AGO3	0.0469762	1	0.0677724
AGMO	0.0301827	1	0.0435444		AGO4	0.0408128	1	0.0588805
AGO1	0.0402063	1	0.0580054		AGPAT1	0.0109621	1	0.0158149
AGO2	-0.0435703	1	-0.0628587		AGPAT2	-0.0233721	1	-0.0337188
AGO3	0.0777352	1	0.112148		AGPAT3	0.00250288	1	0.00361089
AGO4	0.007663	1	0.0110554		AGPAT4	0.0121633	1	0.0175479
AGPAT1	-0.029348	1	-0.0423402		AGPAT5	-0.0160854	1	-0.0232063
AGPAT2	-0.00917736	1	-0.0132401		AGPS	-0.0121324	1	-0.0175034
AGPAT3	0.0332833	1	0.0480177		AGR2	-0.000958629	1	-0.00138301
AGPAT4	0.0746847	0.000164096	0.107747		AGR3	-0.00214277	1	-0.00309137
AGPAT5	-0.034454	1	-0.0497066		AGRN	-0.0386355	1	-0.0557392
AGPS	0.0409955	1	0.059144		AGRP	0.00589085	1	0.0084987
AGR3	-0.000640839	1	-0.000924535		AGT	-0.0117215	1	-0.0169106
AGRN	-0.0649421	1	-0.0936917		AGTPBP1	-0.0382712	1	-0.0552136
AGT	-0.0586315	1	-0.0845874		AGTRAP	0.00102688	1	0.00148147
AGTPBP1	-0.0109816	1	-0.0158432		AGXT2	-0.0025529	1	-0.00368305
AGTR1	0.00175721	1	0.00253512		AHCTF1	0.0114603	1	0.0165337
AGTRAP	-0.0268364	1	-0.0387168		AHCY	0.00991627	1	0.0143062
AGXT2	-0.0012907	1	-0.00186208		AHCYL1	-0.00253047	1	-0.0036507
AHCTF1	-0.0137404	1	-0.0198233		AHCYL2	-0.0310894	1	-0.0448525
AHCY	-0.0134254	1	-0.0193687		AHDC1	0.0162812	1	0.0234888
AHCYL1	-0.2267	0.00332553	-0.327059		AHI1	0.165945	5.95e-05	0.239407
AHCYL2	0.0828989	1	0.119598		AHNAK	0.185268	1.07e-16	0.267285
AHDC1	-0.11107	1	-0.160241		AHNAK2	-0.00913399	1	-0.0131776
AHI1	0.104811	1	0.15121		AHR	0.00180111	1	0.00259846
AHNAK	0.101792	0.647184	0.146855		AHRR	-0.000409087	1	-0.000590188
AHNAK2	-0.0110317	1	-0.0159154		AHSA1	0.0132032	1	0.0190482
AHR	0.00258447	1	0.0037286		AHSA2	0.0223785	1	0.0322853
AHRR	0.00820953	1	0.0118438		AHSG	0.0043219	1	0.00623518
AHSA1	-0.0273298	1	-0.0394285		AICDA	0.00042212	1	0.00060899
AHSA2	0.0125594	1	0.0181194		AIDA	0.00901763	1	0.0130097
AHSG	-0.00269897	1	-0.00389379		AIF1	-0.00313326	1	-0.00452034
AICDA	-0.000656429	1	-0.000947027		AIF1L	-0.0133371	1	-0.0192414
AIDA	-0.00858568	1	-0.0123865		AIFM1	0.0208664	1	0.0301039
AIF1	-0.00724609	1	-0.0104539		AIFM2	-0.0155392	1	-0.0224183
AIF1L	0.0100765	1	0.0145373		AIFM3	0.00605256	1	0.008732
AIFM1	0.0212186	1	0.030612		AIG1	-0.0399983	1	-0.0577054
AIFM2	-0.0132738	1	-0.0191501		AIM1	-0.00995175	1	-0.0143573
AIFM3	0.0368413	1	0.0531507		AIM1L	-0.000276053	1	-0.00039826
AIG1	0.0166662	1	0.0240443		AIM2	0.00129399	1	0.00186684
AIM1	-0.00808593	1	-0.0116655		AIMP1	-0.0135705	1	-0.0195781
AIM1L	0.00236549	1	0.00341268		AIMP2	0.00887816	1	0.0128085
AIM2	0.000143806	1	0.000207468		AIP	-0.00997691	1	-0.0143936
AIMP1	-0.00821833	1	-0.0118565		AIPL1	0.00134387	1	0.00193879
AIMP2	-0.0186655	1	-0.0269287		AIRE	-0.00280095	1	-0.00404091
AIP	-0.0143199	1	-0.0206593		AJAP1	-0.0210579	1	-0.0303801
AIPL1	-0.00736743	1	-0.010629		AK1	0.0574279	0.0191871	0.082851
AIRE	-0.00527216	1	-0.00760611		AK2	-0.0123673	1	-0.0178422
AJAP1	-0.0132583	1	-0.0191277		AK3	0.0508767	1	0.0733996
AK1	0.0505406	0.299451	0.0729147		AK4	-0.0422461	1	-0.0609482
AK2	0.00686988	1	0.00991114		AK5	-0.0205123	1	-0.0295931
AK3	-0.115587	1	-0.166757		AK7	0.00399986	1	0.00577058
AK4	-0.0812216	1	-0.117178		AK8	-0.00315486	1	-0.0045515
AK5	0.0829102	1	0.119614		AK9	0.0569881	1	0.0822165
AK7	0.0144348	1	0.020825		AKAP1	-0.0252897	1	-0.0364853
AK8	0.0411225	1	0.0593273		AKAP10	-0.0389801	1	-0.0562364
AK9	-0.0101445	1	-0.0146355		AKAP11	0.00366206	1	0.00528324
AKAP1	0.030258	1	0.043653		AKAP12	-0.103402	0.000485321	-0.149177
AKAP10	-0.0239028	1	-0.0344844		AKAP13	0.039814	1	0.0574395
AKAP11	-0.0352098	1	-0.050797		AKAP14	-0.0015033	1	-0.0021688
AKAP12	-0.106627	1	-0.15383		AKAP17A	0.00241069	1	0.00347789
AKAP13	-0.134932	1	-0.194666		AKAP3	-0.00143064	1	-0.00206398
AKAP14	-0.00409731	1	-0.00591116		AKAP5	-0.00690238	1	-0.00995803
AKAP17A	0.0315135	1	0.0454643		AKAP6	0.11206	1	0.161669
AKAP3	0.012059	1	0.0173975		AKAP7	-0.0680205	1	-0.0981328
AKAP5	-0.00695158	1	-0.010029		AKAP8	-0.022294	1	-0.0321634
AKAP6	0.0450355	0.462832	0.0649725		AKAP8L	-0.0813535	1	-0.117368
AKAP7	-0.00768028	1	-0.0110803		AKAP9	0.0276395	1	0.0398754
AKAP8	0.0570748	1	0.0823415		AKIP1	-0.00250025	1	-0.00360709
AKAP8L	0.0225791	1	0.0325748		AKIRIN1	0.0277632	1	0.0400539
AKAP9	0.0483002	1	0.0696824		AKIRIN2	-0.00644345	1	-0.00929593
AKIP1	0.00121401	1	0.00175144		AKNA	0.0258522	1	0.0372969
AKIRIN1	-0.0595387	1	-0.0858962		AKNAD1	-0.00681869	1	-0.00983729
AKIRIN2	-0.00837676	1	-0.0120851		AKR1A1	0.00136013	1	0.00196225
AKNA	0.00496322	1	0.00716041		AKR1B1	0.00441346	1	0.00636728
AKNAD1	0.015533	1	0.0224093		AKR1B10	0.00153895	1	0.00222024
AKR1A1	0.0311062	1	0.0448768		AKR1C1	-0.00157465	1	-0.00227174
AKR1B1	-0.0141165	1	-0.0203658		AKR1C2	-0.0164277	1	-0.0237002
AKR1C1	-0.000536492	1	-0.000773994		AKR1D1	0.000751514	1	0.00108421
AKR1C2	-0.002728	1	-0.00393567		AKR1E2	0.0101744	1	0.0146786
AKR1D1	-0.000151017	1	-0.000217871		AKR7A2	0.0197608	1	0.0285088
AKR1E2	0.000691523	1	0.000997657		AKR7A3	0.00122203	1	0.00176301
AKR7A2	0.0295913	1	0.0426911		AKT1	-9.93e-05	1	-0.00014326
AKR7A3	0.0321525	1	0.0463862		AKT2	0.00539637	1	0.00778532
AKT1	0.00586908	1	0.00846729		AKT3	-0.031787	1	-0.045859
AKT2	-0.0260234	1	-0.0375438		AKTIP	0.0210039	1	0.0303023
AKT3	0.0377676	1	0.0544871		ALAD	0.0199759	1	0.0288191
AKTIP	0.00909758	1	0.013125		ALAS1	0.00019374	1	0.000279508
ALAD	0.0204559	1	0.0295116		ALAS2	-0.000940898	1	-0.00135743
ALAS1	-0.000747688	1	-0.00107869		ALB	-0.00192135	1	-0.00277192
ALB	-0.0010573	1	-0.00152537		ALCAM	-0.136262	0.00382515	-0.196584
ALCAM	-0.0106843	1	-0.0154142		ALDH16A1	0.00147071	1	0.00212179
ALDH16A1	0.00328315	1	0.00473659		ALDH18A1	0.000523685	1	0.000755518
ALDH18A1	-0.00441804	1	-0.00637389		ALDH1A1	0.0654596	1	0.0944382
ALDH1A1	0.109597	1	0.158115		ALDH1A2	0.00943303	1	0.013609
ALDH1A2	-0.00187228	1	-0.00270112		ALDH1A3	-0.0108694	1	-0.0156812
ALDH1A3	0.00529404	1	0.00763769		ALDH1B1	-0.00201835	1	-0.00291187
ALDH1B1	-0.00181144	1	-0.00261336		ALDH1L1	-0.109631	1	-0.158165
ALDH1L1	-0.205814	0.316848	-0.296927		ALDH1L1-AS1	0.00090619	1	0.00130736
ALDH1L1-AS2	-0.0123784	1	-0.0178583		ALDH1L1-AS2	-0.0026975	1	-0.00389167
ALDH1L2	0.0113882	1	0.0164297		ALDH1L2	-0.0144606	1	-0.0208622
ALDH2	0.0450272	1	0.0649606		ALDH2	0.0210681	1	0.0303949
ALDH3A2	-0.0250373	1	-0.0361211		ALDH3A2	0.0108724	1	0.0156856
ALDH3B1	-0.00337439	1	-0.00486821		ALDH3B1	-0.00573836	1	-0.0082787
ALDH3B2	-0.000511997	1	-0.000738656		ALDH3B2	-0.000981272	1	-0.00141568
ALDH5A1	0.040174	1	0.0579588		ALDH5A1	-0.0175913	1	-0.0253788
ALDH6A1	-0.0380488	1	-0.0548927		ALDH6A1	0.00388557	1	0.00560569
ALDH7A1	0.217147	0.00842873	0.313277		ALDH7A1	0.117211	0.00108665	0.1691
ALDH8A1	0.0241757	1	0.0348781		ALDH8A1	0.00551309	1	0.00795371
ALDH9A1	-0.00996852	1	-0.0143815		ALDH9A1	0.00952572	1	0.0137427
ALDOA	0.0223507	1	0.0322453		ALDOA	-0.0656883	1	-0.0947681
ALG1	-0.00990081	1	-0.0142839		ALDOB	-0.000532772	1	-0.000768628
ALG10	0.0103403	1	0.0149178		ALG1	0.0154953	1	0.022355
ALG10B	0.00377646	1	0.00544829		ALG10	-0.00151093	1	-0.00217981
ALG11	0.0156728	1	0.022611		ALG10B	0.0257975	1	0.0372179
ALG12	-0.000488849	1	-0.00070526		ALG11	-0.00764337	1	-0.0110271
ALG13	0.0317361	1	0.0457854		ALG12	-0.000441689	1	-0.000637223
ALG14	-0.0135126	1	-0.0194946		ALG13	0.000746762	1	0.00107735
ALG1L	0.00218529	1	0.00315271		ALG14	0.0016334	1	0.0023565
ALG1L2	0.0141714	1	0.0204451		ALG1L	0.0048952	1	0.00706229
ALG2	-0.0188549	1	-0.0272019		ALG1L2	0.00529452	1	0.00763837
ALG3	0.00313927	1	0.00452901		ALG2	0.000462031	1	0.00066657
ALG5	-0.0208277	1	-0.030048		ALG3	-0.00371811	1	-0.0053641
ALG6	0.00129335	1	0.00186592		ALG5	0.0239738	1	0.0345868
ALG8	-0.00949353	1	-0.0136963		ALG6	-0.0106662	1	-0.0153881
ALG9	0.00373286	1	0.00538537		ALG8	0.0497544	1	0.0717804
ALK	-0.00862376	1	-0.0124414		ALG9	-0.0121778	1	-0.0175688
ALKBH1	-0.000897759	1	-0.00129519		ALK	-0.12116	0.270928	-0.174797
ALKBH2	-0.0205286	1	-0.0296165		ALKBH1	0.0112795	1	0.0162729
ALKBH3	0.0133671	1	0.0192847		ALKBH2	-0.00747276	1	-0.0107809
ALKBH4	-0.0128703	1	-0.0185679		ALKBH3	-0.0249551	1	-0.0360026
ALKBH5	-0.0194547	1	-0.0280672		ALKBH3-AS1	-0.000831232	1	-0.00119921
ALKBH6	0.0713095	1	0.102878		ALKBH4	-0.00648891	1	-0.00936152
ALKBH7	0.00325325	1	0.00469345		ALKBH5	0.0238328	1	0.0343834
ALKBH8	-0.00797013	1	-0.0114985		ALKBH6	-0.00390436	1	-0.00563281
ALLC	-0.00416617	1	-0.00601051		ALKBH7	0.00259331	1	0.00374136
ALMS1	0.00676992	1	0.00976693		ALKBH8	-0.00218648	1	-0.00315443
ALOX12	-0.00686197	1	-0.00989973		ALLC	-0.00189204	1	-0.00272964
ALOX12B	0.00616701	1	0.00889712		ALMS1	0.0427267	1	0.0616417
ALOX15	-0.00190005	1	-0.00274119		ALOX12	0.00286948	1	0.00413978
ALOX15B	-0.00303368	1	-0.00437667		ALOX12B	0.00883691	1	0.012749
ALOX5	0.00275475	1	0.00397427		ALOX15	-6.28e-05	1	-9.06012e-05
ALOX5AP	0.0144885	1	0.0209025		ALOX15B	-0.000279761	1	-0.00040361
ALOXE3	0.00907018	1	0.0130855		ALOX5	-0.00376471	1	-0.00543132
ALPK1	0.0335214	1	0.0483612		ALOX5AP	0.00275608	1	0.00397619
ALPK2	-0.00868743	1	-0.0125333		ALOXE3	0.000353026	1	0.000509309
ALPK3	0.0180003	1	0.0259689		ALPK1	0.126678	9.26e-32	0.182758
ALPL	-0.00497244	1	-0.00717372		ALPK2	-0.0045133	1	-0.00651132
ALS2	0.00222699	1	0.00321287		ALPK3	-0.00348285	1	-0.00502469
ALS2CL	-0.00717798	1	-0.0103556		ALPL	0.0165474	1	0.0238728
ALS2CR11	-0.0113981	1	-0.0164439		ALS2	-0.00927916	1	-0.013387
ALS2CR12	-0.0153331	1	-0.0221209		ALS2CL	0.0119608	1	0.0172558
ALX3	-0.00172397	1	-0.00248716		ALS2CR11	-0.00556311	1	-0.00802587
ALX4	-0.00207338	1	-0.00299125		ALS2CR12	0.000108088	1	0.000155938
ALYREF	-0.00436224	1	-0.00629338		ALX4	0.00278663	1	0.00402025
AMACR	0.00150355	1	0.00216916		ALYREF	0.00093183	1	0.00134435
AMBN	-0.00691541	1	-0.00997683		AMACR	-0.00274426	1	-0.00395913
AMBP	0.00115326	1	0.0016638		AMBN	-0.00622303	1	-0.00897794
AMBRA1	-0.0292569	1	-0.0422088		AMBRA1	0.0233432	1	0.0336771
AMD1	-0.0686549	1	-0.0990481		AMD1	0.00330637	1	0.00477009
AMDHD1	-0.000712525	1	-0.00102796		AMDHD1	0.00352476	1	0.00508515
AMDHD2	-0.0229378	1	-0.0330922		AMDHD2	0.00529841	1	0.00764399
AMER1	-0.00206092	1	-0.00297328		AMER1	0.000363306	1	0.00052414
AMER2	-0.10715	1	-0.154585		AMER2	-0.106403	5.31e-05	-0.153507
AMER3	-0.00398277	1	-0.00574592		AMER3	0.00776556	1	0.0112033
AMFR	-0.0524173	1	-0.0756222		AMFR	-0.0247926	1	-0.0357682
AMH	-0.00513734	1	-0.00741162		AMH	-0.00448127	1	-0.00646511
AMIGO1	0.0162726	1	0.0234764		AMHR2	-0.000756993	1	-0.00109211
AMIGO2	-0.00976092	1	-0.014082		AMIGO1	-0.022401	1	-0.0323178
AMIGO3	0.00141256	1	0.00203789		AMIGO2	0.00639356	1	0.00922396
AMMECR1	-0.038418	1	-0.0554255		AMMECR1	0.0130895	1	0.0188842
AMMECR1L	-0.0244998	1	-0.0353457		AMMECR1L	-0.0141939	1	-0.0204775
AMN	0.000290623	1	0.00041928		AMN	-0.000301425	1	-0.000434864
AMN1	-0.0222661	1	-0.0321231		AMN1	-0.0399778	1	-0.0576757
AMOT	0.000332057	1	0.000479057		AMOT	-0.015297	1	-0.0220689
AMOTL1	0.033462	1	0.0482754		AMOTL1	0.0174641	1	0.0251953
AMOTL2	-0.0170636	1	-0.0246176		AMOTL2	-0.0127931	1	-0.0184565
AMPD1	0.0317437	1	0.0457965		AMPD1	0.000667962	1	0.000963665
AMPD2	0.00362744	1	0.00523329		AMPD2	-0.0185089	1	-0.0267027
AMPD3	-0.00642474	1	-0.00926894		AMPD3	-0.00468699	1	-0.0067619
AMPH	0.0235226	1	0.0339359		AMPH	-0.0370962	1	-0.0535185
AMT	-0.014616	1	-0.0210864		AMT	0.000338839	1	0.000488841
AMY2A	0.00235913	1	0.00340351		AMY1A	0.000429484	1	0.000619614
AMY2B	-0.00381485	1	-0.00550366		AMY2A	-0.00317685	1	-0.00458323
AMZ1	-0.0358116	1	-0.0516653		AMY2B	-0.0452846	1	-0.0653318
AMZ2	0.124371	1	0.179429		AMZ1	-0.0821647	0.00552594	-0.118539
ANAPC1	-0.00111898	1	-0.00161434		AMZ2	-0.0407358	1	-0.0587693
ANAPC10	-0.00727894	1	-0.0105013		ANAPC1	0.00437807	1	0.00631622
ANAPC11	-0.0266201	1	-0.0384047		ANAPC10	-0.0247514	1	-0.0357088
ANAPC13	0.0387295	1	0.0558749		ANAPC11	0.0170765	1	0.0246362
ANAPC15	0.0215542	1	0.0310962		ANAPC13	0.0213325	1	0.0307763
ANAPC16	-0.0694163	1	-0.100147		ANAPC15	-0.0026605	1	-0.00383829
ANAPC2	0.00030627	1	0.000441854		ANAPC16	0.0224901	1	0.0324464
ANAPC4	0.0694219	1	0.100155		ANAPC2	0.0272205	1	0.0392709
ANAPC5	-0.0546924	1	-0.0789044		ANAPC4	-0.0178591	1	-0.0257652
ANAPC7	-0.0498606	1	-0.0719337		ANAPC5	-0.0310816	1	-0.0448413
ANGEL1	0.036813	1	0.0531099		ANAPC7	0.0225693	1	0.0325606
ANGEL2	-0.000581542	1	-0.000838988		ANGEL1	-0.00703846	1	-0.0101543
ANGPT1	0.130767	2.41e-07	0.188656		ANGEL2	0.0374991	1	0.0540997
ANGPT2	-0.0020589	1	-0.00297036		ANGPT1	0.182243	6.96e-28	0.262921
ANGPT4	-0.00126137	1	-0.00181978		ANGPT2	-0.0218641	1	-0.0315432
ANGPTL1	0.0264885	1	0.0382149		ANGPT4	-0.00260925	1	-0.00376435
ANGPTL2	-0.00142185	1	-0.00205129		ANGPTL1	-0.0264876	1	-0.0382135
ANGPTL4	-0.266251	0.0778901	-0.384119		ANGPTL2	-0.00123979	1	-0.00178864
ANGPTL5	-0.00589814	1	-0.00850922		ANGPTL4	0.565512	4.01e-40	0.815862
ANGPTL6	0.0128392	1	0.0185231		ANGPTL5	-0.000846187	1	-0.00122079
ANGPTL7	0.00232883	1	0.00335979		ANGPTL6	0.00143625	1	0.00207207
ANK1	-0.00390403	1	-0.00563232		ANGPTL7	-0.00293383	1	-0.00423262
ANK2	0.00903527	1	0.0130351		ANK1	0.00515477	1	0.00743676
ANK3	0.0774354	0.0645731	0.111716		ANK2	0.082034	0.00200476	0.11835
ANKAR	-0.0567493	1	-0.0818719		ANK3	-0.0493493	1	-0.0711961
ANKDD1A	-0.123009	1	-0.177464		ANKAR	-0.033438	1	-0.0482409
ANKDD1B	0.0021334	1	0.00307784		ANKDD1A	-0.0597562	1	-0.0862099
ANKEF1	-0.0114827	1	-0.0165661		ANKDD1B	-0.00838193	1	-0.0120926
ANKFN1	0.191317	0.0227039	0.276012		ANKEF1	0.00353483	1	0.00509969
ANKFY1	0.026144	0.64569	0.0377179		ANKFN1	0.100937	0.00142742	0.145621
ANKH	0.0139141	1	0.0200739		ANKFY1	0.0262978	1	0.0379398
ANKHD1-EIF4EBP3	-0.00116683	1	-0.00168339		ANKH	-0.0126801	1	-0.0182936
ANKIB1	0.05823	1	0.0840082		ANKHD1	0.00284746	1	0.00410801
ANKK1	-0.00240404	1	-0.00346829		ANKHD1-EIF4EBP3	-0.011232	1	-0.0162043
ANKLE1	-0.00579028	1	-0.00835361		ANKIB1	-0.0339682	1	-0.0490058
ANKLE2	-0.0195864	1	-0.0282572		ANKK1	-0.00186702	1	-0.00269354
ANKMY1	-0.0165895	1	-0.0239336		ANKLE1	-0.00271627	1	-0.00391875
ANKMY2	-0.011141	1	-0.016073		ANKLE2	-0.0045443	1	-0.00655604
ANKRA2	0.0450946	1	0.0650578		ANKMY1	-0.00718127	1	-0.0103604
ANKRD10	-0.0384648	1	-0.055493		ANKMY2	0.00529832	1	0.00764385
ANKRD11	0.031361	0.605399	0.0452444		ANKRA2	0.0114427	1	0.0165083
ANKRD12	-0.0424181	1	-0.0611964		ANKRD10	-0.00827168	1	-0.0119335
ANKRD13A	0.00322353	1	0.00465057		ANKRD11	0.0268802	1	0.03878
ANKRD13C	-0.0253672	1	-0.0365971		ANKRD12	0.0309378	1	0.0446338
ANKRD13D	0.03404	1	0.0491094		ANKRD13A	0.00820887	1	0.0118429
ANKRD16	-0.00355752	1	-0.00513242		ANKRD13C	0.00506583	1	0.00730845
ANKRD17	0.00379799	1	0.00547934		ANKRD13D	0.0380052	1	0.0548299
ANKRD18A	-0.0061973	1	-0.00894081		ANKRD16	0.0290701	1	0.0419393
ANKRD18B	0.00240589	1	0.00347096		ANKRD17	0.0305858	1	0.044126
ANKRD2	-0.00300017	1	-0.00432833		ANKRD18A	-0.00313962	1	-0.00452952
ANKRD20A1	-0.00219524	1	-0.00316706		ANKRD18B	-0.00159158	1	-0.00229617
ANKRD20A2	0.00144354	1	0.00208259		ANKRD2	-0.000438967	1	-0.000633295
ANKRD20A3	-0.00586728	1	-0.00846469		ANKRD20A1	-0.00338845	1	-0.0048885
ANKRD20A4	0.00511457	1	0.00737876		ANKRD20A2	-0.000591201	1	-0.000852923
ANKRD22	-0.00530521	1	-0.0076538		ANKRD20A3	-0.004276	1	-0.00616897
ANKRD23	0.0113613	1	0.0163909		ANKRD20A4	0.00253708	1	0.00366023
ANKRD24	0.0381076	1	0.0549777		ANKRD22	-0.00109708	1	-0.00158275
ANKRD26	0.0117349	1	0.0169299		ANKRD23	0.00798729	1	0.0115232
ANKRD27	0.00684871	1	0.00988059		ANKRD24	-0.0384466	1	-0.0554668
ANKRD28	0.0151825	1	0.0219037		ANKRD26	0.0291866	1	0.0421073
ANKRD29	-0.00480043	1	-0.00692556		ANKRD27	-0.0163896	1	-0.0236451
ANKRD30A	-0.0114008	1	-0.0164479		ANKRD28	0.0941988	0.000713331	0.1359
ANKRD30B	-0.00850779	1	-0.0122742		ANKRD29	-0.0129284	1	-0.0186517
ANKRD30BL	-0.0135136	1	-0.019496		ANKRD30A	-0.00332721	1	-0.00480015
ANKRD31	-0.00351277	1	-0.00506785		ANKRD30B	-0.0117947	1	-0.0170161
ANKRD33B	-0.0168398	1	-0.0242948		ANKRD30BL	0.0180619	1	0.0260578
ANKRD34A	-0.00624693	1	-0.00901241		ANKRD31	0.00027671	1	0.000399208
ANKRD34B	-0.000803346	1	-0.00115898		ANKRD33B	-0.0011109	1	-0.00160269
ANKRD35	-0.0145484	1	-0.0209889		ANKRD34A	-0.00461283	1	-0.0066549
ANKRD36	0.0103917	1	0.014992		ANKRD34B	-0.0019203	1	-0.0027704
ANKRD36B	0.00954041	1	0.0137639		ANKRD35	-0.0208929	1	-0.0301421
ANKRD36C	0.073442	0.00181452	0.105954		ANKRD36	0.0306791	1	0.0442606
ANKRD37	-0.00848586	1	-0.0122425		ANKRD36B	-0.00354839	1	-0.00511924
ANKRD40	-0.00483805	1	-0.00697983		ANKRD36C	0.0246989	1	0.035633
ANKRD42	0.0031841	1	0.00459369		ANKRD37	0.00893067	1	0.0128842
ANKRD44	0.00239597	1	0.00345665		ANKRD40	-0.00320811	1	-0.00462833
ANKRD45	-0.00415656	1	-0.00599665		ANKRD42	0.0230426	1	0.0332435
ANKRD46	0.00214925	1	0.00310072		ANKRD44	-0.0148568	1	-0.0214339
ANKRD49	-0.0193994	1	-0.0279874		ANKRD45	0.0143821	1	0.020749
ANKRD50	-0.00416875	1	-0.00601424		ANKRD46	0.000786688	1	0.00113495
ANKRD52	0.0154494	1	0.0222887		ANKRD49	-0.0266888	1	-0.0385038
ANKRD53	-0.00396118	1	-0.00571477		ANKRD50	-0.00269726	1	-0.00389132
ANKRD54	-0.017442	1	-0.0251634		ANKRD52	0.0372208	1	0.0536982
ANKRD55	-0.00850829	1	-0.0122749		ANKRD53	-0.00181849	1	-0.00262353
ANKRD6	0.0360841	1	0.0520584		ANKRD54	0.00731709	1	0.0105563
ANKRD61	-0.00214103	1	-0.00308885		ANKRD55	-0.0101494	1	-0.0146424
ANKRD62	-0.00294039	1	-0.00424208		ANKRD6	0.0720679	0.111245	0.103972
ANKRD65	-0.0320625	1	-0.0462565		ANKRD61	0.000108108	1	0.000155967
ANKRD7	-0.000370463	1	-0.000534465		ANKRD62	0.00742253	1	0.0107084
ANKRD9	0.0379013	1	0.0546801		ANKRD65	-0.0392137	1	-0.0565734
ANKS1A	-0.0426645	1	-0.0615519		ANKRD7	0.00840498	1	0.0121258
ANKS1B	0.10196	1	0.147097		ANKRD9	-0.00802793	1	-0.0115819
ANKS3	0.0202288	1	0.029184		ANKS1A	-0.0169324	1	-0.0244283
ANKS4B	0.00109731	1	0.00158308		ANKS1B	-0.0108276	1	-0.0156209
ANKS6	-0.0140826	1	-0.020317		ANKS3	0.0176184	1	0.025418
ANKUB1	0.0297305	1	0.042892		ANKS4B	-0.000958382	1	-0.00138265
ANKZF1	-0.00107279	1	-0.00154771		ANKS6	-0.0108098	1	-0.0155952
ANLN	0.00407848	1	0.00588401		ANKUB1	-0.0426888	1	-0.0615869
ANO1	0.0170709	1	0.0246282		ANKZF1	0.0163315	1	0.0235614
ANO10	0.0514546	1	0.0742333		ANLN	0.0261536	1	0.0377317
ANO2	0.00577047	1	0.00832504		ANO1	0.00142145	1	0.00205072
ANO3	0.0343058	1	0.0494927		ANO10	0.00272979	1	0.00393825
ANO4	-0.00469028	1	-0.00676664		ANO2	-0.0126757	1	-0.0182872
ANO5	-0.0947096	1	-0.136637		ANO3	-0.0058923	1	-0.00850079
ANO6	-0.117841	0.411162	-0.170008		ANO4	-0.0104374	1	-0.015058
ANO7	0.00222879	1	0.00321547		ANO5	0.0570438	1	0.0822969
ANO8	0.00484407	1	0.00698852		ANO6	0.0985886	0.980363	0.142233
ANO9	0.00706966	1	0.0101994		ANO7	0.025249	1	0.0364266
ANP32A	-0.014738	1	-0.0212625		ANO8	-0.0749527	1	-0.108134
ANP32B	-0.0282111	1	-0.0407		ANO9	-0.00215649	1	-0.00311115
ANP32E	-0.0190231	1	-0.0274445		ANP32A	0.00968094	1	0.0139666
ANPEP	0.00374895	1	0.00540859		ANP32B	0.00696668	1	0.0100508
ANTXR1	0.102975	0.227601	0.148561		ANP32E	0.00292186	1	0.00421535
ANTXR2	0.00619712	1	0.00894056		ANPEP	0.00704188	1	0.0101593
ANTXRL	0.00116874	1	0.00168613		ANTXR1	0.172906	1.1e-07	0.24945
ANXA1	-0.0156552	1	-0.0225856		ANTXR2	0.0237687	1	0.034291
ANXA10	-0.00362646	1	-0.00523188		ANTXRL	0.00114278	1	0.00164868
ANXA11	0.0562258	1	0.0811167		ANXA1	0.0268079	1	0.0386756
ANXA13	-0.00427936	1	-0.00617381		ANXA10	-0.00533391	1	-0.00769521
ANXA2	-0.0126466	1	-0.0182452		ANXA11	-0.00402913	1	-0.00581281
ANXA2R	-0.00329841	1	-0.0047586		ANXA13	0.0131576	1	0.0189824
ANXA3	-0.00185271	1	-0.00267289		ANXA2	0.0313555	0.0254359	0.0452364
ANXA4	0.013509	1	0.0194893		ANXA2R	-0.000780794	1	-0.00112645
ANXA5	0.00264013	1	0.0038089		ANXA3	0.000839398	1	0.001211
ANXA6	0.0196811	1	0.0283939		ANXA4	0.0460999	1	0.0665081
ANXA7	-0.0123954	1	-0.0178828		ANXA5	0.0175092	1	0.0252604
ANXA8	-0.00281357	1	-0.00405913		ANXA6	-0.042867	1	-0.061844
ANXA8L1	0.061594	1	0.0888614		ANXA7	-0.0162379	1	-0.0234264
ANXA9	-0.00358327	1	-0.00516957		ANXA8	-0.0124826	1	-0.0180086
AOAH	0.00954323	1	0.013768		ANXA8L1	0.0271457	0.0867495	0.039163
AOC1	-0.000696673	1	-0.00100509		ANXA9	-0.002199	1	-0.00317249
AOC2	-0.00346094	1	-0.00499308		AOAH	-0.00330143	1	-0.00476295
AOC3	0.000583188	1	0.000841362		AOC1	-0.0009915	1	-0.00143043
AOX1	-0.0222098	1	-0.0320419		AOC2	-0.000511258	1	-0.000737589
AP1AR	0.0145609	1	0.021007		AOC3	-0.00248482	1	-0.00358483
AP1B1	-0.0723461	1	-0.104373		AOX1	-0.0021351	1	-0.00308031
AP1G1	-0.0584631	1	-0.0843444		AP1AR	0.00276089	1	0.00398312
AP1G2	0.0472905	1	0.0682257		AP1B1	-0.0849281	1	-0.122525
AP1M1	-0.0492581	1	-0.0710644		AP1G1	-0.00362498	1	-0.00522974
AP1M2	-0.00150706	1	-0.00217423		AP1G2	0.0506084	1	0.0730126
AP1S1	-0.00262161	1	-0.00378218		AP1M1	-0.0447471	1	-0.0645565
AP1S2	-0.0154344	1	-0.0222671		AP1M2	-0.00492918	1	-0.00711131
AP1S3	-0.0195566	1	-0.0282142		AP1S1	0.00813978	1	0.0117432
AP2A1	-0.0202077	1	-0.0291535		AP1S2	0.208217	3.46e-39	0.300393
AP2A2	-0.0556517	1	-0.0802885		AP1S3	0.0191985	1	0.0276976
AP2B1	-0.0321262	1	-0.0463483		AP2A1	-0.0384543	1	-0.0554778
AP2S1	-0.0347903	1	-0.0501917		AP2A2	-0.0040448	1	-0.00583541
AP3B1	0.0493896	1	0.0712541		AP2B1	0.0173836	1	0.0250792
AP3B2	0.0538937	1	0.0777522		AP2S1	-0.0276556	1	-0.0398986
AP3D1	-0.00426404	1	-0.00615171		AP3B1	0.00217638	1	0.00313985
AP3M1	-0.00505861	1	-0.00729804		AP3B2	-0.00797528	1	-0.0115059
AP3M2	0.0250424	1	0.0361285		AP3D1	-0.00846855	1	-0.0122175
AP3S1	-0.018607	1	-0.0268443		AP3M1	0.00687119	1	0.00991303
AP3S2	-0.0103992	1	-0.0150028		AP3M2	0.0110908	1	0.0160006
AP4B1	-0.00175475	1	-0.00253157		AP3S1	-0.00711364	1	-0.0102628
AP4B1-AS1	0.000651416	1	0.000939795		AP3S2	-0.0280714	1	-0.0404984
AP4E1	0.0193497	1	0.0279158		AP4B1	-0.0105316	1	-0.0151938
AP4M1	0.0410773	1	0.059262		AP4B1-AS1	0.0024715	1	0.00356562
AP4S1	-0.044692	1	-0.064477		AP4E1	-0.00617309	1	-0.00890588
AP5B1	-0.00382578	1	-0.00551944		AP4M1	0.00777205	1	0.0112127
AP5M1	-0.0148618	1	-0.0214411		AP4S1	0.0225397	1	0.0325179
AP5S1	-0.00520425	1	-0.00750815		AP5B1	-0.00299214	1	-0.00431674
AP5Z1	-0.0228667	1	-0.0329897		AP5M1	0.0263907	1	0.0380737
APAF1	-0.0116923	1	-0.0168684		AP5S1	-0.01613	1	-0.0232707
APBA1	-0.0198348	1	-0.0286155		AP5Z1	0.00579476	1	0.00836007
APBA2	-0.0243329	1	-0.0351049		APAF1	0.00450506	1	0.00649943
APBA3	0.0385532	1	0.0556205		APBA1	-0.0537317	1	-0.0775185
APBB1	-0.0941778	1	-0.13587		APBA2	-0.0574423	1	-0.0828717
APBB1IP	0.00861906	1	0.0124347		APBA3	-0.0180539	1	-0.0260463
APBB2	-0.0369117	1	-0.0532524		APBB1	-0.110552	1	-0.159492
APBB3	-0.026563	1	-0.0383224		APBB1IP	-0.0119664	1	-0.0172638
APC	-0.253046	3.22e-07	-0.365068		APBB2	-0.0416171	1	-0.0600407
APC2	0.112951	0.0035439	0.162953		APBB3	0.0203562	1	0.0293678
APCDD1	-0.0550101	1	-0.0793628		APC	0.0344984	1	0.0497707
APCDD1L	-0.000480513	1	-0.000693234		APC2	-0.0747895	1	-0.107898
APEH	-0.050776	1	-0.0732544		APCDD1	-0.0627522	1	-0.0905323
APEX1	0.0398955	1	0.057557		APCDD1L	-0.00676181	1	-0.00975522
APEX2	-0.0118523	1	-0.0170993		APEH	-0.0238704	1	-0.0344376
APH1A	-0.0020598	1	-0.00297166		APEX1	-0.00128649	1	-0.00185601
APH1B	-0.0122472	1	-0.0176689		APEX2	-0.00230038	1	-0.00331874
API5	0.0375099	1	0.0541153		APH1A	-0.0204947	1	-0.0295676
APIP	-0.014414	1	-0.020795		APH1B	-0.0185005	1	-0.0266905
APITD1-CORT	-0.000331903	1	-0.000478835		API5	-0.0433347	1	-0.0625187
APLF	0.0326138	1	0.0470518		APIP	0.0129566	1	0.0186924
APLN	0.00611139	1	0.00881687		APITD1-CORT	0.000128521	1	0.000185417
APLNR	0.0936089	1	0.135049		APLF	0.00192347	1	0.00277498
APLP1	0.0474876	1	0.0685101		APLN	-0.00469794	1	-0.00677769
APLP2	0.0609674	1	0.0879574		APLNR	0.229222	2.53e-62	0.330697
APMAP	0.0444709	1	0.0641579		APLP1	0.0613101	1	0.0884517
APOA1	-0.00716724	1	-0.0103401		APLP2	-0.0586512	1	-0.0846158
APOA1BP	0.00173266	1	0.0024997		APMAP	0.00436764	1	0.00630118
APOB	0.00427336	1	0.00616516		APOA1	0.0161774	1	0.0233391
APOBEC1	0.000667558	1	0.000963083		APOA1BP	-0.00560436	1	-0.00808539
APOBEC2	-0.00117648	1	-0.0016973		APOB	0.000266704	1	0.000384773
APOBEC3A	-0.00174813	1	-0.00252202		APOBEC1	0.00262888	1	0.00379268
APOBEC3B-AS1	-0.00117533	1	-0.00169564		APOBEC2	-0.00390065	1	-0.00562745
APOBEC3D	-0.00291634	1	-0.00420739		APOBEC3A	-0.000491502	1	-0.000709087
APOBEC3G	0.000274685	1	0.000396287		APOBEC3B-AS1	-0.000945243	1	-0.0013637
APOBEC3H	0.00520693	1	0.00751201		APOBEC3C	0.00157975	1	0.0022791
APOBEC4	-0.00148369	1	-0.00214052		APOBEC3D	0.00158911	1	0.00229261
APOC1	-0.024501	1	-0.0353475		APOBEC3G	0.0266982	1	0.0385173
APOD	-0.0515111	1	-0.0743148		APOBEC3H	-0.00165064	1	-0.00238137
APOE	-0.0924324	1	-0.133352		APOBEC4	3.91e-05	1	5.64094e-05
APOH	0.00562912	1	0.00812111		APOBR	0.00495996	1	0.00715571
APOL1	-0.00437635	1	-0.00631374		APOC1	-0.0176542	1	-0.0254696
APOL2	-0.0616237	1	-0.0889042		APOD	-0.00678109	1	-0.00978305
APOL3	-0.0136054	1	-0.0196284		APOE	-0.250676	0.00344901	-0.361648
APOL4	-0.0188188	1	-0.0271498		APOF	0.000790362	1	0.00114025
APOL5	0.000743385	1	0.00107248		APOH	0.00462138	1	0.00666724
APOL6	-0.0412467	1	-0.0595065		APOL1	0.00114352	1	0.00164975
APOLD1	-0.0109953	1	-0.0158629		APOL2	-0.00708646	1	-0.0102236
APOM	0.0202588	1	0.0292272		APOL3	0.00180173	1	0.00259934
APOO	-0.0438607	1	-0.0632776		APOL4	0.00132069	1	0.00190535
APOOL	-0.0499411	1	-0.0720497		APOL5	0.00277303	1	0.00400064
APP	0.182305	1	0.263011		APOL6	-0.00508446	1	-0.00733532
APPBP2	0.0797289	1	0.115025		APOLD1	0.0491172	0.910271	0.0708612
APPL1	0.0152842	1	0.0220505		APOM	0.00378078	1	0.00545451
APPL2	0.0177233	1	0.0255693		APOO	0.0207949	1	0.0300006
APRT	0.0413247	1	0.0596189		APOOL	0.00749063	1	0.0108067
APTX	0.00748959	1	0.0108052		APP	0.0484688	1	0.0699257
AQP1	0.291408	7.51e-07	0.420413		APPBP2	-0.00914955	1	-0.0132
AQP10	-0.000417273	1	-0.000601998		APPL1	0.000716255	1	0.00103334
AQP11	-0.0169762	1	-0.0244914		APPL2	0.0126497	1	0.0182497
AQP3	-0.00274649	1	-0.00396235		APRT	-0.00658012	1	-0.00949311
AQP4	0.0187469	1	0.0270461		APTX	0.0504159	1	0.0727348
AQP4-AS1	0.293683	6.47e-10	0.423695		AQP1	0.748271	2.26e-155	1.07953
AQP5	0.000283604	1	0.000409154		AQP10	0.00908622	1	0.0131086
AQP6	0.00761491	1	0.010986		AQP11	-0.00134425	1	-0.00193934
AQP7	-0.00326997	1	-0.00471757		AQP3	0.00129305	1	0.00186547
AQP8	-0.00329419	1	-0.00475252		AQP4	0.329218	5.79e-24	0.474961
AQP9	0.0128524	1	0.0185421		AQP4-AS1	0.502394	8.02e-60	0.724802
AQR	0.0342519	1	0.049415		AQP5	0.0022634	1	0.00326539
AR	0.0751734	1	0.108452		AQP6	-0.000718128	1	-0.00103604
ARAF	-0.0128634	1	-0.0185579		AQP7	0.00101114	1	0.00145877
ARAP1	-0.00572371	1	-0.00825758		AQP8	-0.00155557	1	-0.00224422
ARAP1-AS1	-0.00761958	1	-0.0109927		AQP9	-0.00124894	1	-0.00180184
ARAP2	-0.000390561	1	-0.00056346		AQR	0.0307252	1	0.044327
ARAP3	-0.00118312	1	-0.00170688		AR	0.00453899	1	0.00654839
ARC	-0.0409353	1	-0.0590572		ARAF	-0.0271541	1	-0.039175
ARCN1	-0.0111396	1	-0.016071		ARAP1	0.0109229	1	0.0157584
AREL1	-0.0435431	1	-0.0628194		ARAP1-AS1	-0.00122757	1	-0.00177101
ARF1	-0.00815378	1	-0.0117634		ARAP1-AS2	-0.00119934	1	-0.00173029
ARF3	0.0144018	1	0.0207774		ARAP2	0.0784295	1	0.11315
ARF4	-0.0199812	1	-0.0288268		ARAP3	-0.00135406	1	-0.00195349
ARF5	-0.00543696	1	-0.00784387		ARC	-0.0194142	1	-0.0280088
ARF6	-0.0183026	1	-0.026405		ARCN1	-0.0171559	1	-0.0247508
ARFGAP1	-0.0593622	1	-0.0856415		AREG	0.000648444	1	0.000935507
ARFGAP2	-0.0268861	1	-0.0387884		AREL1	-0.0120757	1	-0.0174216
ARFGAP3	-0.0326556	1	-0.0471121		ARF1	0.0105458	1	0.0152144
ARFGEF1	-0.0680224	1	-0.0981356		ARF3	0.000592337	1	0.000854562
ARFGEF2	-0.0266897	1	-0.0385052		ARF4	0.0140343	1	0.0202473
ARFIP1	-0.0678329	1	-0.0978622		ARF5	-0.0229384	1	-0.0330931
ARFIP2	-0.00668629	1	-0.00964628		ARF6	-0.0120611	1	-0.0174005
ARFRP1	-0.0428893	1	-0.0618762		ARFGAP1	-0.114397	1	-0.16504
ARG1	0.000491624	1	0.000709263		ARFGAP2	0.00856808	1	0.0123611
ARG2	0.00694906	1	0.0100254		ARFGAP3	0.0783814	1	0.11308
ARGFX	-0.00256316	1	-0.00369786		ARFGEF1	0.0202876	1	0.0292688
ARGLU1	-0.0310042	1	-0.0447296		ARFGEF2	-0.0210266	1	-0.0303349
ARHGAP1	-0.00950961	1	-0.0137195		ARFIP1	-0.0101098	1	-0.0145853
ARHGAP10	0.0304479	1	0.0439271		ARFIP2	0.00462873	1	0.00667785
ARHGAP11A	-0.00337885	1	-0.00487465		ARFRP1	-0.0007451	1	-0.00107495
ARHGAP11B	0.0118427	1	0.0170854		ARG1	0.0010462	1	0.00150935
ARHGAP12	0.115278	1	0.166311		ARG2	0.00867713	1	0.0125185
ARHGAP15	0.0217472	1	0.0313746		ARGFX	-0.00189936	1	-0.0027402
ARHGAP17	0.00990284	1	0.0142868		ARGLU1	0.00475572	1	0.00686106
ARHGAP18	0.0128146	1	0.0184876		ARHGAP1	0.00272846	1	0.00393634
ARHGAP19-SLIT1	-0.00325197	1	-0.00469161		ARHGAP10	0.0943269	2.1e-07	0.136085
ARHGAP20	-0.00579588	1	-0.00836169		ARHGAP11A	0.00821743	1	0.0118552
ARHGAP21	0.0581532	1	0.0838973		ARHGAP11B	-0.0121329	1	-0.017504
ARHGAP22	0.00966091	1	0.0139377		ARHGAP12	-0.0137078	1	-0.0197762
ARHGAP23	0.0132348	1	0.0190938		ARHGAP15	-0.0189021	1	-0.02727
ARHGAP24	-0.238003	0.000150128	-0.343365		ARHGAP17	0.0193013	1	0.0278459
ARHGAP25	0.0113743	1	0.0164097		ARHGAP18	0.0278858	1	0.0402308
ARHGAP26	0.0424343	0.457669	0.0612197		ARHGAP19-SLIT1	-0.000670952	1	-0.000967979
ARHGAP26-AS1	0.0179853	1	0.0259474		ARHGAP20	-0.00765913	1	-0.0110498
ARHGAP27	-0.01135	1	-0.0163746		ARHGAP21	0.018615	1	0.0268557
ARHGAP28	-0.00152914	1	-0.00220608		ARHGAP22	0.0125772	1	0.0181451
ARHGAP29	-0.0534452	1	-0.0771051		ARHGAP23	-0.0623566	1	-0.0899616
ARHGAP30	-0.00410594	1	-0.00592362		ARHGAP24	-0.46737	2.59e-56	-0.674272
ARHGAP31	0.0274168	1	0.0395541		ARHGAP25	-0.00469907	1	-0.00677932
ARHGAP31-AS1	0.00526182	1	0.00759119		ARHGAP26	0.0177719	1	0.0256395
ARHGAP32	0.050975	1	0.0735413		ARHGAP26-AS1	0.0131813	1	0.0190165
ARHGAP33	-0.0204443	1	-0.0294949		ARHGAP27	0.00138791	1	0.00200233
ARHGAP35	-0.0996844	1	-0.143814		ARHGAP28	0.00158328	1	0.00228419
ARHGAP39	0.0147502	1	0.02128		ARHGAP29	-0.121753	1.47e-12	-0.175653
ARHGAP4	-0.00215448	1	-0.00310826		ARHGAP30	-0.0047519	1	-0.00685555
ARHGAP40	-0.00466411	1	-0.00672889		ARHGAP31	-0.0277074	1	-0.0399733
ARHGAP42	0.15228	0.000550718	0.219693		ARHGAP31-AS1	-0.0040446	1	-0.00583513
ARHGAP44	0.0708699	1	0.102244		ARHGAP32	-0.0966934	1	-0.139499
ARHGAP5	-0.0249959	1	-0.0360615		ARHGAP33	-0.0300227	1	-0.0433136
ARHGAP5-AS1	0.0188668	1	0.027219		ARHGAP35	-0.0645049	1	-0.0930609
ARHGAP6	0.0517376	1	0.0746416		ARHGAP36	8.95e-05	1	0.000129121
ARHGAP8	0.00788698	1	0.0113785		ARHGAP39	0.0924862	0.0854416	0.133429
ARHGAP9	0.000654155	1	0.000943746		ARHGAP4	-0.00275447	1	-0.00397386
ARHGDIA	0.0278607	1	0.0401944		ARHGAP40	-0.000228998	1	-0.000330374
ARHGDIB	-0.00266777	1	-0.00384878		ARHGAP42	0.0760027	1	0.109649
ARHGDIG	0.0442874	1	0.0638932		ARHGAP44	0.0155761	1	0.0224715
ARHGEF1	0.00660272	1	0.00952572		ARHGAP5	-0.0106641	1	-0.015385
ARHGEF10	0.0344116	1	0.0496454		ARHGAP5-AS1	-0.00219443	1	-0.00316589
ARHGEF10L	0.0396273	0.211271	0.0571701		ARHGAP6	0.0784906	1.44e-05	0.113238
ARHGEF11	-0.051444	1	-0.074218		ARHGAP8	-0.00670238	1	-0.00966949
ARHGEF12	-0.0811675	1	-0.1171		ARHGAP9	-0.00220376	1	-0.00317935
ARHGEF15	0.00237983	1	0.00343337		ARHGDIA	-0.00230497	1	-0.00332537
ARHGEF16	-0.00419106	1	-0.00604642		ARHGDIB	-0.00514333	1	-0.00742026
ARHGEF17	0.016353	1	0.0235923		ARHGDIG	-0.0214145	1	-0.0308946
ARHGEF19	-0.00435331	1	-0.00628049		ARHGEF1	0.000171748	1	0.00024778
ARHGEF2	0.0276996	1	0.039962		ARHGEF10	0.0441454	1	0.0636883
ARHGEF25	-0.0301224	1	-0.0434575		ARHGEF10L	-0.0554804	1	-0.0800413
ARHGEF26	-0.0340273	1	-0.0490911		ARHGEF11	0.0633851	1	0.0914453
ARHGEF28	-0.00440457	1	-0.00635446		ARHGEF12	-0.0958478	1	-0.138279
ARHGEF3	-0.177454	0.00822453	-0.256012		ARHGEF15	-0.000707839	1	-0.0010212
ARHGEF3-AS1	-0.00635554	1	-0.0091691		ARHGEF16	-0.0118679	1	-0.0171218
ARHGEF33	0.00107712	1	0.00155395		ARHGEF17	0.0701717	0.00286452	0.101236
ARHGEF37	-0.00261471	1	-0.00377223		ARHGEF19	0.0124036	1	0.0178946
ARHGEF38	-0.00555202	1	-0.00800987		ARHGEF2	-0.00116552	1	-0.00168149
ARHGEF39	-0.00166648	1	-0.00240422		ARHGEF25	-0.0203088	1	-0.0292994
ARHGEF4	0.397564	1.27e-24	0.573564		ARHGEF26	0.0988625	1	0.142628
ARHGEF40	-0.021891	1	-0.0315821		ARHGEF28	-0.000671514	1	-0.00096879
ARHGEF5	-0.0015991	1	-0.00230701		ARHGEF3	0.276756	1.14e-30	0.399275
ARHGEF6	-0.0310682	1	-0.044822		ARHGEF3-AS1	0.00297383	1	0.00429032
ARHGEF7	0.0340848	1	0.049174		ARHGEF33	-0.00299004	1	-0.00431372
ARHGEF9	0.00991187	1	0.0142998		ARHGEF37	-0.015955	1	-0.0230182
ARID1A	-0.0138123	1	-0.019927		ARHGEF38	0.000103278	1	0.000148999
ARID1B	-0.0406113	1	-0.0585897		ARHGEF39	-0.00228112	1	-0.00329096
ARID2	0.0156141	1	0.0225265		ARHGEF4	0.365006	6.97e-28	0.526592
ARID3A	-0.0210503	1	-0.0303692		ARHGEF40	-0.0132234	1	-0.0190773
ARID3B	0.0213846	1	0.0308515		ARHGEF5	0.00407899	1	0.00588473
ARID4A	0.0861333	1	0.124264		ARHGEF6	0.0596427	1	0.0860462
ARID4B	-0.053468	1	-0.0771379		ARHGEF7	0.0178902	1	0.0258101
ARID5A	-0.126004	1	-0.181785		ARHGEF7-AS2	-0.00120642	1	-0.00174049
ARID5B	-0.131592	1	-0.189847		ARHGEF9	-0.0205976	1	-0.029716
ARIH1	-0.0291751	1	-0.0420908		ARID1A	0.0767279	1	0.110695
ARIH2	-0.0258642	1	-0.0373141		ARID1B	-0.00228879	1	-0.00330202
ARIH2OS	0.0201746	1	0.0291058		ARID2	0.000538176	1	0.000776424
ARL1	-0.00476144	1	-0.00686931		ARID3A	0.0133902	1	0.019318
ARL10	-0.0210673	1	-0.0303936		ARID3B	-0.00956441	1	-0.0137985
ARL11	0.000500069	1	0.000721447		ARID4A	-0.0202997	1	-0.0292863
ARL13A	0.014911	1	0.0215121		ARID4B	0.0167755	1	0.024202
ARL13B	-0.0266613	1	-0.0384641		ARID5A	-0.00876869	1	-0.0126505
ARL14EP	-0.00494423	1	-0.00713301		ARID5B	0.0607016	1	0.0875739
ARL15	0.0275096	1	0.0396879		ARIH1	0.0714263	0.0769716	0.103046
ARL16	-0.0016908	1	-0.0024393		ARIH2	-0.0132171	1	-0.0190683
ARL17A	-0.00807394	1	-0.0116482		ARIH2OS	-0.00117194	1	-0.00169075
ARL17B	0.304865	9.41e-18	0.439827		ARL1	-0.0252541	1	-0.0364339
ARL2-SNX15	-0.0148046	1	-0.0213585		ARL10	0.00992403	1	0.0143173
ARL2BP	0.0956345	1	0.137971		ARL11	-0.00114092	1	-0.001646
ARL3	0.0349062	1	0.050359		ARL13A	0.000736219	1	0.00106214
ARL4A	-0.00797245	1	-0.0115018		ARL13B	0.0146088	1	0.0210761
ARL4C	0.00646785	1	0.00933113		ARL14EP	-0.00191876	1	-0.00276819
ARL4D	-0.00508233	1	-0.00733225		ARL15	-0.0161143	1	-0.023248
ARL5A	0.0759169	1	0.109525		ARL16	-0.0241653	1	-0.0348632
ARL5B	-0.0231657	1	-0.033421		ARL17A	-0.00481108	1	-0.00694093
ARL5C	-0.00200149	1	-0.00288754		ARL17B	-0.0447545	1	-0.0645671
ARL6	0.0318939	1	0.0460132		ARL2-SNX15	0.00188034	1	0.00271276
ARL6IP1	0.00397324	1	0.00573218		ARL2BP	-0.0228185	1	-0.0329201
ARL6IP4	0.0289331	1	0.0417416		ARL3	0.0164991	1	0.0238032
ARL6IP5	0.00508737	1	0.00733953		ARL4A	-0.00371899	1	-0.00536537
ARL6IP6	-0.0269746	1	-0.0389161		ARL4C	-0.0232912	1	-0.0336021
ARL8A	0.0317494	1	0.0458047		ARL4D	-0.0116307	1	-0.0167796
ARL8B	-0.0692475	1	-0.0999031		ARL5A	0.0292457	1	0.0421927
ARL9	-0.00194512	1	-0.00280622		ARL5B	-0.00620234	1	-0.00894809
ARMC1	0.000874089	1	0.00126104		ARL5C	0.0012462	1	0.00179789
ARMC10	-0.0453648	1	-0.0654476		ARL6	-0.0224049	1	-0.0323234
ARMC12	-0.00485127	1	-0.0069989		ARL6IP1	-0.00167401	1	-0.00241508
ARMC2	0.0273989	1	0.0395282		ARL6IP4	-0.0481712	1	-0.0694964
ARMC2-AS1	-0.000760384	1	-0.001097		ARL6IP5	-0.00482577	1	-0.00696211
ARMC3	0.0374393	1	0.0540135		ARL6IP6	0.0113899	1	0.0164321
ARMC4	0.00537117	1	0.00774895		ARL8A	0.00124274	1	0.0017929
ARMC5	-0.00143294	1	-0.00206729		ARL8B	-0.0336228	1	-0.0485074
ARMC6	-0.0119494	1	-0.0172394		ARL9	-0.00290268	1	-0.00418768
ARMC7	-0.0127508	1	-0.0183955		ARMC1	-0.0100178	1	-0.0144526
ARMC8	-0.0338315	1	-0.0488086		ARMC10	0.00204216	1	0.00294621
ARMC9	0.0266922	1	0.0385087		ARMC12	0.00780628	1	0.0112621
ARMCX1	0.0455233	1	0.0656763		ARMC2	0.0350729	1	0.0505995
ARMCX2	0.000866774	1	0.00125049		ARMC2-AS1	-0.000556641	1	-0.000803063
ARMCX3	-0.00767465	1	-0.0110722		ARMC3	0.051011	1.55e-05	0.0735934
ARMCX3-AS1	0.00686526	1	0.00990447		ARMC4	0.0150714	1	0.0217435
ARMCX4	0.00760178	1	0.0109671		ARMC5	-0.00671748	1	-0.00969127
ARMCX5	-0.00564297	1	-0.00814109		ARMC6	-0.0024799	1	-0.00357774
ARMCX6	0.0063518	1	0.00916371		ARMC7	0.000982457	1	0.00141739
ARNT	-0.011176	1	-0.0161236		ARMC8	0.0212141	1	0.0306055
ARNT2	0.0131718	0.0995829	0.0190029		ARMC9	0.0285474	1	0.0411852
ARNTL	0.0157767	1	0.0227609		ARMCX1	0.0178036	1	0.0256852
ARNTL2	-0.000473468	1	-0.00068307		ARMCX2	-0.0130093	1	-0.0187684
ARPC1A	0.0131161	1	0.0189225		ARMCX3	-0.00715352	1	-0.0103204
ARPC1B	0.00623909	1	0.0090011		ARMCX3-AS1	0.000744003	1	0.00107337
ARPC2	0.00406826	1	0.00586925		ARMCX4	-0.0271462	1	-0.0391637
ARPC3	0.0443844	1	0.0640331		ARMCX5	0.00157329	1	0.00226977
ARPC5	0.00698765	1	0.010081		ARMCX6	0.00421719	1	0.00608412
ARPC5L	0.0134544	1	0.0194106		ARMS2	-0.000655032	1	-0.000945011
ARPP19	0.0246496	1	0.0355618		ARNT	0.000207972	1	0.00030004
ARPP21	0.0894467	1	0.129044		ARNT2	-0.0172997	1	-0.0249582
ARRB1	-0.0027396	1	-0.00395241		ARNTL	-0.0486031	1	-0.0701194
ARRB2	0.0273606	1	0.039473		ARNTL2	0.00737774	1	0.0106438
ARRDC1	-0.0490832	1	-0.0708121		ARPC1A	0.0642956	1	0.0927589
ARRDC2	0.0103534	1	0.0149368		ARPC1B	-0.000345351	1	-0.000498236
ARRDC3	-0.0558048	1	-0.0805093		ARPC2	0.0117493	1	0.0169506
ARRDC3-AS1	0.0113289	1	0.0163442		ARPC3	0.0178962	1	0.0258188
ARRDC4	0.00365316	1	0.0052704		ARPC5	-0.0127858	1	-0.018446
ARRDC5	-6.85e-05	1	-9.88246e-05		ARPC5L	-0.0140946	1	-0.0203342
ARSA	-0.00634174	1	-0.0091492		ARPP19	-0.0898395	1	-0.129611
ARSB	-0.0508189	1	-0.0733161		ARPP21	-0.0401142	1	-0.0578725
ARSD	-0.0243082	1	-0.0350693		ARR3	0.00153802	1	0.00221889
ARSD-AS1	-0.00311478	1	-0.00449368		ARRB1	-0.0338433	1	-0.0488255
ARSE	-0.0101266	1	-0.0146096		ARRB2	-0.00117303	1	-0.00169232
ARSF	0.00305333	1	0.00440503		ARRDC1	-0.0335858	1	-0.0484541
ARSG	-0.0120488	1	-0.0173827		ARRDC2	-0.0121218	1	-0.017488
ARSH	-0.00674169	1	-0.0097262		ARRDC3	0.000523168	1	0.000754772
ARSI	-0.0135179	1	-0.0195022		ARRDC3-AS1	0.00617908	1	0.00891454
ARSJ	-0.0129506	1	-0.0186838		ARRDC4	0.0682359	1.02e-17	0.0984436
ARSK	-0.0102758	1	-0.0148248		ARRDC5	0.00220536	1	0.00318166
ART1	-6.6e-06	1	-9.52179e-06		ARSA	-0.0017699	1	-0.00255342
ART3	-0.00491429	1	-0.00708982		ARSB	0.0140541	1	0.0202758
ART4	-0.00493658	1	-0.00712197		ARSD	-0.0205124	1	-0.0295931
ARTN	-0.00296524	1	-0.00427793		ARSD-AS1	0.00339245	1	0.00489428
ARV1	0.00504013	1	0.00727137		ARSE	0.00126275	1	0.00182177
ARVCF	0.085877	1	0.123894		ARSF	-0.00397896	1	-0.00574043
ARX	-0.0215523	1	-0.0310934		ARSG	0.0526752	1	0.0759943
ASAH1	-0.0180078	1	-0.0259798		ARSH	-0.00453755	1	-0.0065463
ASAH2	0.00393541	1	0.00567759		ARSI	-0.0140135	1	-0.0202172
ASAH2B	-0.00513735	1	-0.00741163		ARSJ	0.0138001	1	0.0199093
ASAP1	-0.0712988	1	-0.102862		ARSK	-0.0145026	1	-0.0209229
ASAP2	-0.0902382	1	-0.130186		ART1	-0.00167294	1	-0.00241354
ASAP3	-0.0184059	1	-0.0265541		ART3	0.00496599	1	0.00716441
ASB1	-0.0135289	1	-0.0195181		ART4	-0.00428121	1	-0.00617649
ASB11	0.00322946	1	0.00465912		ART5	0.000324069	1	0.000467533
ASB13	0.00921703	1	0.0132974		ARTN	0.0109416	1	0.0157854
ASB14	-0.00477212	1	-0.00688472		ARV1	-0.00641087	1	-0.00924893
ASB15	-0.00823969	1	-0.0118874		ARVCF	0.0133811	1	0.0193048
ASB16	0.00564755	1	0.00814769		ARX	-0.034126	1	-0.0492335
ASB16-AS1	-0.0133584	1	-0.019272		ASAH1	0.0307932	1	0.0444253
ASB17	0.00394569	1	0.00569243		ASAH2	0.00196509	1	0.00283502
ASB18	0.000761644	1	0.00109882		ASAH2B	-0.0037924	1	-0.00547128
ASB2	-3.46e-05	1	-4.99172e-05		ASAP1	0.0176101	1	0.025406
ASB3	0.0182427	1	0.0263187		ASAP2	-0.000981222	1	-0.0014156
ASB4	-0.00394747	1	-0.005695		ASAP3	0.0400979	1	0.057849
ASB5	0.00395074	1	0.00569971		ASB1	-0.0107014	1	-0.0154389
ASB6	-0.0140699	1	-0.0202986		ASB11	-0.00148898	1	-0.00214815
ASB7	0.0451438	1	0.0651287		ASB13	-0.00761857	1	-0.0109913
ASB8	-0.0282588	1	-0.0407688		ASB14	0.00601879	1	0.00868328
ASB9	-0.0039114	1	-0.00564296		ASB15	0.00704665	1	0.0101662
ASCC1	0.0559629	1	0.0807374		ASB16	-0.01106	1	-0.0159562
ASCC2	-0.0193138	1	-0.0278639		ASB16-AS1	0.0021823	1	0.00314839
ASCC3	0.0110702	1	0.015971		ASB17	-0.00493406	1	-0.00711835
ASCL1	-0.0122243	1	-0.0176359		ASB18	0.00571346	1	0.00824278
ASCL2	0.00206888	1	0.00298476		ASB2	0.0162093	1	0.023385
ASF1A	-0.0062025	1	-0.00894831		ASB3	0.00204438	1	0.00294941
ASF1B	-0.00314248	1	-0.00453363		ASB4	-0.00885378	1	-0.0127733
ASGR1	0.00115218	1	0.00166225		ASB5	-0.00291576	1	-0.00420655
ASH1L	0.0225876	1	0.032587		ASB6	-0.0491585	1	-0.0709207
ASH1L-AS1	-0.00302118	1	-0.00435864		ASB7	-0.00973807	1	-0.0140491
ASH2L	0.00776638	1	0.0112045		ASB8	-0.00337812	1	-0.0048736
ASIC1	0.0361108	1	0.0520968		ASB9	-0.000341523	1	-0.000492714
ASIC2	0.145288	1	0.209607		ASCC1	0.0930328	1	0.134218
ASIC3	-0.0097685	1	-0.014093		ASCC2	-0.0171291	1	-0.024712
ASIC4	-0.00428748	1	-0.00618552		ASCC3	0.00277611	1	0.00400508
ASIP	-0.00634382	1	-0.0091522		ASCL1	-0.0366562	1	-0.0528838
ASL	-0.00455623	1	-0.00657325		ASCL5	0.00156023	1	0.00225094
ASMT	0.00327531	1	0.00472528		ASF1A	-0.020692	1	-0.0298522
ASMTL	-0.00395049	1	-0.00569935		ASF1B	-0.00024747	1	-0.000357024
ASMTL-AS1	0.0328794	1	0.0474349		ASGR1	0.00947379	1	0.0136678
ASNA1	-0.017528	1	-0.0252876		ASGR2	0.00302107	1	0.00435848
ASNS	0.0137363	1	0.0198172		ASH1L	-0.0119059	1	-0.0171766
ASNSD1	-0.0283478	1	-0.0408973		ASH1L-AS1	0.00206173	1	0.00297444
ASPA	-0.0148248	1	-0.0213876		ASH2L	-0.00632857	1	-0.0091302
ASPDH	-0.0175505	1	-0.02532		ASIC1	-0.0214266	1	-0.0309121
ASPG	-0.000186944	1	-0.000269703		ASIC2	0.00418239	1	0.00603391
ASPH	-0.130875	0.157177	-0.188812		ASIC3	0.0133586	1	0.0192723
ASPHD1	0.0759922	1	0.109634		ASIC4	-0.00329369	1	-0.00475179
ASPHD2	-0.0046581	1	-0.00672021		ASIP	0.0046809	1	0.00675311
ASPM	-0.00131576	1	-0.00189825		ASL	0.00290985	1	0.00419803
ASPN	0.000697754	1	0.00100665		ASMT	-0.00484107	1	-0.00698418
ASPRV1	-0.00466977	1	-0.00673705		ASMTL	-0.0303551	1	-0.0437932
ASPSCR1	-0.000802078	1	-0.00115715		ASMTL-AS1	-0.0270684	1	-0.0390514
ASRGL1	-0.0826553	1	-0.119246		ASNA1	0.00757634	1	0.0109303
ASS1	0.00797178	1	0.0115008		ASNS	0.0128994	1	0.0186099
ASTE1	-0.00402241	1	-0.00580311		ASNSD1	-0.0106637	1	-0.0153845
ASTL	0.000614434	1	0.000886441		ASPA	0.0222121	1	0.0320452
ASTN1	0.0421794	1	0.060852		ASPDH	-0.0142351	1	-0.020537
ASTN2	0.0446333	0.192769	0.0643923		ASPG	0.00084331	1	0.00121664
ASUN	0.0144691	1	0.0208745		ASPH	-0.107979	1	-0.15578
ASXL1	-0.0821471	1	-0.118513		ASPHD1	-0.00506372	1	-0.00730541
ASXL2	0.00347938	1	0.00501968		ASPHD2	-0.0144329	1	-0.0208223
ASXL3	0.0340251	1	0.0490879		ASPM	-0.00282032	1	-0.00406886
ASZ1	-0.00312707	1	-0.00451141		ASPN	-2.52e-05	1	-3.63559e-05
ATAD1	-0.0454971	1	-0.0656384		ASPRV1	-0.0016497	1	-0.00238002
ATAD2	0.0203974	1	0.0294272		ASPSCR1	0.0175486	1	0.0253172
ATAD2B	-0.0200417	1	-0.0289141		ASRGL1	-0.16452	3.09e-07	-0.237352
ATAD3A	-0.00111793	1	-0.00161282		ASS1	0.0375496	1	0.0541726
ATAD3B	0.0929822	1	0.134145		ASTE1	-0.0210143	1	-0.0303172
ATAD3C	-0.0101133	1	-0.0145905		ASTL	0.00734097	1	0.0105908
ATAD5	-0.00546067	1	-0.00787808		ASTN1	-0.0740476	1	-0.106828
ATAT1	-0.0287819	1	-0.0415235		ASTN2	0.0902202	1	0.13016
ATCAY	0.00515692	1	0.00743987		ASUN	-0.000994382	1	-0.00143459
ATE1	-0.0191884	1	-0.027683		ASXL1	-0.0130542	1	-0.0188333
ATF1	-0.00278166	1	-0.00401309		ASXL2	0.00672329	1	0.00969966
ATF2	0.00336898	1	0.00486041		ASXL3	-0.00307738	1	-0.00443971
ATF3	-0.0169379	1	-0.0244363		ASZ1	-0.000443544	1	-0.000639899
ATF4	0.00719121	1	0.0103747		ATAD1	-0.033781	1	-0.0487357
ATF5	-0.0110738	1	-0.0159761		ATAD2	-0.0132511	1	-0.0191173
ATF6	0.00331547	1	0.00478321		ATAD2B	-0.0250881	1	-0.0361945
ATF6B	-0.0332523	1	-0.047973		ATAD3A	0.00531798	1	0.00767222
ATF7	0.00348269	1	0.00502445		ATAD3B	-0.0232326	1	-0.0335176
ATF7IP	0.0204328	1	0.0294782		ATAD3C	0.00826738	1	0.0119273
ATF7IP2	-0.0384561	1	-0.0554804		ATAD5	-0.0141868	1	-0.0204672
ATG10	0.0419861	1	0.0605732		ATAT1	0.00209019	1	0.0030155
ATG12	0.0130046	1	0.0187617		ATCAY	-0.0296132	1	-0.0427228
ATG13	-0.0489284	1	-0.0705888		ATE1	0.0314713	1	0.0454035
ATG14	0.0354866	1	0.0511963		ATF1	0.0220126	1	0.0317574
ATG16L1	-0.000522926	1	-0.000754423		ATF2	-0.0176475	1	-0.02546
ATG16L2	0.00482158	1	0.00695607		ATF3	0.0461995	1	0.0666517
ATG2A	-0.0153304	1	-0.022117		ATF4	-0.0333521	1	-0.048117
ATG2B	9.37e-05	1	0.000135181		ATF5	-0.0146382	1	-0.0211185
ATG3	-0.00122489	1	-0.00176714		ATF6	-0.0187388	1	-0.0270344
ATG4A	0.00918206	1	0.0132469		ATF6B	-0.0224705	1	-0.032418
ATG4B	-0.0464968	1	-0.0670808		ATF7	0.00179646	1	0.00259174
ATG4C	-0.0105794	1	-0.0152629		ATF7IP	0.00287471	1	0.00414733
ATG4D	0.0134181	1	0.0193582		ATF7IP2	0.0201588	1	0.029083
ATG5	-0.0197519	1	-0.0284959		ATG10	0.00517426	1	0.00746489
ATG7	-0.0177034	1	-0.0255406		ATG12	-0.00830299	1	-0.0119787
ATG9A	-0.0233867	1	-0.0337399		ATG13	-0.0521191	1	-0.075192
ATG9B	-6.42e-05	1	-9.2621e-05		ATG14	-0.0102393	1	-0.0147722
ATHL1	0.0662661	1	0.0956018		ATG16L1	-0.00695937	1	-0.0100402
ATIC	-0.00894588	1	-0.0129062		ATG16L2	-0.000737987	1	-0.00106469
ATL1	0.025913	1	0.0373846		ATG2A	-0.0107254	1	-0.0154735
ATL2	-0.0403452	1	-0.0582058		ATG2B	-0.0180403	1	-0.0260267
ATL3	0.00336589	1	0.00485595		ATG3	-0.0119628	1	-0.0172587
ATM	0.0129368	1	0.0186639		ATG4A	0.00588487	1	0.00849008
ATMIN	0.0264099	1	0.0381014		ATG4B	0.000649971	1	0.00093771
ATN1	0.0894751	1	0.129085		ATG4C	0.00966921	1	0.0139497
ATOH7	0.000364422	1	0.00052575		ATG4D	0.0271991	1	0.03924
ATOH8	0.0120211	1	0.0173428		ATG5	-0.00112853	1	-0.00162813
ATOX1	-0.0184017	1	-0.0265481		ATG7	-0.0160703	1	-0.0231846
ATP10A	0.00469055	1	0.00676704		ATG9A	-0.00897167	1	-0.0129434
ATP10B	-0.0522724	1	-0.0754132		ATG9B	-0.00102407	1	-0.00147742
ATP10D	0.0228955	1	0.0330312		ATHL1	0.002135	1	0.00308016
ATP11A	-0.110988	1	-0.160122		ATIC	-0.0132832	1	-0.0191636
ATP11A-AS1	-0.00269373	1	-0.00388623		ATL1	0.00997872	1	0.0143963
ATP11B	0.00178287	1	0.00257214		ATL2	-0.099859	0.00209509	-0.144066
ATP11C	0.0436192	1	0.0629292		ATL3	-0.0235486	1	-0.0339734
ATP12A	-0.0743388	1	-0.107248		ATM	0.0035701	1	0.00515057
ATP13A1	-0.00054342	1	-0.000783989		ATMIN	-0.0170225	1	-0.0245582
ATP13A2	0.0194811	1	0.0281052		ATN1	-0.0776604	1	-0.11204
ATP13A3	0.0502433	1	0.0724858		ATOH7	-0.000865435	1	-0.00124856
ATP13A4	-0.000113708	1	-0.000164046		ATOH8	0.0248862	1	0.0359033
ATP13A4-AS1	0.00409799	1	0.00591214		ATOX1	0.0332628	1	0.047988
ATP13A5	-0.00623074	1	-0.00898906		ATP10A	-0.0057142	1	-0.00824384
ATP1A1	-0.0393966	1	-0.0568373		ATP10B	-0.101341	0.549909	-0.146204
ATP1A2	-0.0414915	1	-0.0598596		ATP10D	0.00136776	1	0.00197326
ATP1A3	-0.014851	1	-0.0214255		ATP11A	0.00899764	1	0.0129809
ATP1A4	0.0132306	1	0.0190877		ATP11B	-0.01841	1	-0.02656
ATP1B1	0.0385916	1	0.0556759		ATP11C	-0.000135952	1	-0.000196137
ATP1B2	-0.335858	1.83e-09	-0.484541		ATP12A	-0.00254787	1	-0.00367581
ATP1B3	0.00163776	1	0.00236279		ATP13A1	0.00224661	1	0.00324117
ATP2A1	0.0151793	1	0.0218991		ATP13A2	-0.0112914	1	-0.01629
ATP2A2	0.0240586	1	0.0347093		ATP13A3	0.118745	1.57e-07	0.171312
ATP2A3	-0.00519906	1	-0.00750066		ATP13A4	-0.0545912	1	-0.0787585
ATP2B1	0.0277731	1	0.0400681		ATP13A4-AS1	0.00180572	1	0.0026051
ATP2B2	0.0440699	1	0.0635794		ATP13A5	0.00415822	1	0.00599904
ATP2B3	-0.0035007	1	-0.00505044		ATP1A1	0.006798	1	0.00980744
ATP2B4	-0.082734	1	-0.11936		ATP1A2	-0.196963	0.0109799	-0.284157
ATP2C1	-0.08379	1	-0.120883		ATP1A3	-0.0336899	1	-0.0486043
ATP2C2	-0.0185682	1	-0.0267882		ATP1A4	0.0046261	1	0.00667405
ATP5A1	0.0417404	1	0.0602187		ATP1B1	-0.136562	1	-0.197018
ATP5B	-0.025813	1	-0.0372402		ATP1B2	-0.421195	1.56e-26	-0.607655
ATP5C1	0.0118808	1	0.0171404		ATP1B3	0.0605176	1	0.0873085
ATP5D	-0.0297066	1	-0.0428576		ATP1B3-AS1	0.000564211	1	0.000813984
ATP5E	-0.0503336	1	-0.072616		ATP2A1	-0.00436438	1	-0.00629647
ATP5EP2	-0.0113266	0.424396	-0.0163408		ATP2A2	-0.0415595	1	-0.0599577
ATP5F1	-0.00914435	1	-0.0131925		ATP2A3	0.00180424	1	0.00260296
ATP5G1	-0.00297079	1	-0.00428594		ATP2B1	-0.0334627	1	-0.0482764
ATP5G2	0.0284764	1	0.0410827		ATP2B2	-0.0202654	1	-0.0292368
ATP5G3	-0.0414161	1	-0.0597508		ATP2B3	-0.0202462	1	-0.0292091
ATP5H	0.0295911	0.085584	0.0426909		ATP2B4	-0.0659908	1	-0.0952046
ATP5I	0.000961479	1	0.00138712		ATP2C1	-0.11205	0.000470238	-0.161654
ATP5J	-0.0415137	1	-0.0598916		ATP2C2	-0.0166451	1	-0.0240138
ATP5L	0.0250491	1	0.0361382		ATP4A	0.000342897	1	0.000494696
ATP5S	0.00057295	1	0.000826592		ATP5A1	-0.0367535	1	-0.0530242
ATP5SL	-0.0240593	1	-0.0347102		ATP5B	-0.0573217	1	-0.0826978
ATP6AP1	-0.0132087	1	-0.0190562		ATP5C1	-0.00687976	1	-0.0099254
ATP6AP1L	0.00389166	1	0.00561448		ATP5D	-0.0659531	1	-0.0951503
ATP6AP2	-0.0463949	1	-0.0669337		ATP5E	0.0567047	1	0.0818076
ATP6V0A1	0.0401463	1	0.0579188		ATP5EP2	0.0556782	1	0.0803266
ATP6V0A2	0.00597138	1	0.00861488		ATP5F1	0.00497242	1	0.00717368
ATP6V0A4	0.00707616	1	0.0102087		ATP5G1	-0.00817667	1	-0.0117964
ATP6V0B	-0.00129197	1	-0.00186392		ATP5G2	0.0715023	0.00966053	0.103156
ATP6V0D1	-0.0262666	1	-0.0378946		ATP5G3	0.00412636	1	0.00595309
ATP6V0D2	0.00100811	1	0.0014544		ATP5H	0.0271691	1	0.0391967
ATP6V0E1	-0.0304352	1	-0.0439087		ATP5I	0.115012	0.0140049	0.165927
ATP6V0E2	0.0137309	1	0.0198094		ATP5J	0.0220906	1	0.03187
ATP6V0E2-AS1	0.0152951	1	0.0220662		ATP5J2	0.00666557	1	0.00961638
ATP6V1A	0.0395109	1	0.0570022		ATP5L	0.00296679	1	0.00428017
ATP6V1B1	-0.00115736	1	-0.00166971		ATP5S	-0.0100059	1	-0.0144354
ATP6V1B2	-0.0653666	1	-0.0943041		ATP5SL	-0.016124	1	-0.0232621
ATP6V1C1	0.0257944	1	0.0372134		ATP6AP1	-0.0522923	1	-0.0754418
ATP6V1C2	-0.0024476	1	-0.00353114		ATP6AP1L	-0.0185372	1	-0.0267436
ATP6V1D	0.0468165	1	0.0675419		ATP6AP2	-0.0052645	1	-0.00759507
ATP6V1E1	0.0267098	1	0.038534		ATP6V0A1	-0.00581885	1	-0.00839482
ATP6V1E2	0.036086	1	0.0520611		ATP6V0A2	0.00226586	1	0.00326895
ATP6V1F	-0.0319531	1	-0.0460986		ATP6V0A4	-0.00404337	1	-0.00583334
ATP6V1G1	-0.0363124	1	-0.0523877		ATP6V0B	-0.0526814	1	-0.0760032
ATP6V1G2	-0.00322511	1	-0.00465285		ATP6V0D1	-0.0577115	1	-0.08326
ATP6V1G2-DDX39B	-0.00340394	1	-0.00491085		ATP6V0D2	-0.00428153	1	-0.00617695
ATP6V1H	-0.0377467	1	-0.054457		ATP6V0E1	-0.0188594	1	-0.0272083
ATP7A	0.00986227	1	0.0142282		ATP6V0E2	0.0412364	1	0.0594916
ATP7B	-0.0126112	1	-0.0181942		ATP6V0E2-AS1	-0.00418624	1	-0.00603946
ATP8A1	-0.0570169	1	-0.0822579		ATP6V1A	-0.00223783	1	-0.0032285
ATP8A2	0.0217772	1	0.0314178		ATP6V1B1	-0.00308931	1	-0.00445693
ATP8B1	-0.0278532	1	-0.0401837		ATP6V1B2	0.000153908	1	0.000222042
ATP8B2	-0.0147046	1	-0.0212143		ATP6V1C1	-0.00395583	1	-0.00570705
ATP8B3	0.010172	1	0.014675		ATP6V1C2	0.00866138	1	0.0124957
ATP8B4	-0.00037317	1	-0.00053837		ATP6V1D	-0.0164194	1	-0.0236882
ATP9A	0.0712243	1	0.102755		ATP6V1E1	0.0161581	1	0.0233112
ATP9B	0.055887	1	0.080628		ATP6V1E2	-0.00285625	1	-0.0041207
ATPAF1	-0.0392008	1	-0.0565548		ATP6V1F	0.031488	1	0.0454276
ATPAF2	0.0733851	1	0.105872		ATP6V1G1	-0.0232454	1	-0.033536
ATPIF1	0.0231045	1	0.0333328		ATP6V1G2	0.0106248	1	0.0153284
ATR	-0.00405931	1	-0.00585635		ATP6V1G2-DDX39B	-0.00106146	1	-0.00153137
ATRAID	-0.0104411	1	-0.0150633		ATP6V1G3	0.00227936	1	0.00328842
ATRN	0.0384441	1	0.0554631		ATP6V1H	-0.043043	1	-0.062098
ATRNL1	0.0531555	1	0.0766872		ATP7A	-0.0134387	1	-0.0193879
ATRX	-0.0430447	1	-0.0621004		ATP7B	0.0134019	1	0.0193349
ATXN1	0.250355	0.00040798	0.361186		ATP8A1	-0.118365	0.000387702	-0.170764
ATXN10	-0.00325699	1	-0.00469885		ATP8A2	-0.0118418	1	-0.0170841
ATXN2	0.0233932	1	0.0337492		ATP8B1	0.00490187	1	0.00707191
ATXN2L	0.000942984	1	0.00136044		ATP8B2	-0.00440315	1	-0.0063524
ATXN3	-0.026765	1	-0.0386137		ATP8B3	-0.00274596	1	-0.00396158
ATXN7	0.0720833	1	0.103994		ATP8B4	-0.000333008	1	-0.000480429
ATXN7L1	-0.0750136	1	-0.108222		ATP9A	0.202726	5.2e-16	0.292473
ATXN7L2	-0.0124537	1	-0.0179669		ATP9B	-0.013128	1	-0.0189397
ATXN7L3	0.0301793	1	0.0435395		ATPAF1	0.0308576	1	0.0445181
ATXN7L3B	-0.0117172	1	-0.0169043		ATPAF2	-1.86e-05	1	-2.68341e-05
ATXN8OS	-0.00124377	1	-0.00179438		ATPIF1	0.00622201	1	0.00897647
AUH	0.00384927	0.772855	0.00555332		ATR	-0.0281557	1	-0.0406201
AUNIP	0.00110447	1	0.00159341		ATRAID	0.00507401	1	0.00732024
AUP1	-0.0139021	1	-0.0200564		ATRN	0.0160253	1	0.0231197
AURKA	-0.0032767	1	-0.00472728		ATRNL1	0.000306226	1	0.000441791
AURKAIP1	-0.0132152	1	-0.0190655		ATRX	0.008441	1	0.0121778
AURKB	-0.000666855	1	-0.000962068		ATXN1	0.0209563	1	0.0302335
AURKC	0.00326675	1	0.00471293		ATXN10	-0.0356143	1	-0.0513805
AUTS2	0.101649	1	0.146649		ATXN2	0.00422189	1	0.0060909
AVEN	-0.0173908	1	-0.0250896		ATXN2L	-0.00148919	1	-0.00214845
AVIL	-0.0181536	1	-0.0261902		ATXN3	0.00773718	1	0.0111624
AVL9	0.0276913	1	0.0399501		ATXN7	-0.000541292	1	-0.000780919
AVP	0.00151803	1	0.00219005		ATXN7L1	-0.0374996	1	-0.0541005
AVPI1	-0.0100708	1	-0.0145291		ATXN7L2	0.00319761	1	0.00461318
AWAT1	-0.00565517	1	-0.00815868		ATXN7L3	-0.0150878	1	-0.021767
AWAT2	-0.000832572	1	-0.00120115		ATXN7L3B	0.00125701	1	0.00181348
AXDND1	-0.0072612	1	-0.0104757		ATXN8OS	-0.00266239	1	-0.00384102
AXIN1	-0.0047323	1	-0.00682726		AUH	0.0592658	1	0.0855024
AXIN2	0.0374527	1	0.0540328		AUNIP	-0.0160743	1	-0.0231904
AXL	-0.0612844	1	-0.0884147		AUP1	0.016934	1	0.0244305
AZGP1	-0.0049135	1	-0.00708868		AURKA	-0.00385535	1	-0.00556209
AZI2	-0.0297248	1	-0.0428839		AURKAIP1	0.0400916	1	0.05784
AZIN1	0.130243	1	0.1879		AURKB	-0.000971363	1	-0.00140138
AZU1	-0.000409263	1	-0.000590442		AURKC	0.00184081	1	0.00265573
B2M	-0.160545	1	-0.231617		AUTS2	-0.042871	1	-0.0618498
B3GALNT1	0.00342261	1	0.00493779		AVEN	-0.00682948	1	-0.00985285
B3GALNT2	-0.0231933	1	-0.0334609		AVIL	-0.0158742	1	-0.0229016
B3GALT1	-0.000905575	1	-0.00130647		AVL9	-0.0145196	1	-0.0209474
B3GALT2	-0.0150505	1	-0.0217133		AVPI1	-0.00801897	1	-0.0115689
B3GALT4	0.002569	1	0.00370629		AWAT1	0.00679524	1	0.00980346
B3GALT5	0.0696533	1	0.100488		AWAT2	0.000836741	1	0.00120716
B3GALT6	-0.013269	1	-0.0191432		AXDND1	-0.00581002	1	-0.00838209
B3GAT1	0.00829022	1	0.0119603		AXIN1	0.0244797	1	0.0353168
B3GAT2	0.161834	9.03e-06	0.233477		AXIN2	-0.00589065	1	-0.00849842
B3GAT3	-0.105452	1	-0.152135		AXL	-0.0526003	1	-0.0758862
B3GNT2	-0.0097303	1	-0.0140379		AZGP1	-0.00415424	1	-0.0059933
B3GNT3	-0.00275947	1	-0.00398108		AZI2	0.0192151	1	0.0277216
B3GNT4	0.0074815	1	0.0107935		AZIN1	0.0195171	1	0.0281573
B3GNT5	-0.0213459	1	-0.0307957		AZU1	0.00962251	1	0.0138824
B3GNT7	0.00304002	1	0.00438582		B2M	0.061027	0.016453	0.0880433
B3GNT9	-0.00824663	1	-0.0118974		B3GALNT1	-0.0111412	1	-0.0160733
B3GNTL1	-0.0152765	1	-0.0220394		B3GALNT2	-0.0117583	1	-0.0169636
B4GALNT1	0.00184259	1	0.0026583		B3GALT1	-0.0246848	1	-0.0356126
B4GALNT2	0.00253862	1	0.00366245		B3GALT2	-0.015983	1	-0.0230587
B4GALNT3	-0.00993614	1	-0.0143348		B3GALT4	0.000838557	1	0.00120978
B4GALNT4	-0.113354	0.728165	-0.163536		B3GALT5	0.0610048	0.0244196	0.0880113
B4GALT1	0.00202744	1	0.00292498		B3GALT6	-0.0106719	1	-0.0153962
B4GALT2	0.00583081	1	0.00841208		B3GAT1	-0.0425867	1	-0.0614397
B4GALT3	-0.0159565	1	-0.0230204		B3GAT2	0.18509	1.72e-22	0.267028
B4GALT4	0.00908455	1	0.0131062		B3GAT3	-0.0218002	1	-0.031451
B4GALT4-AS1	-0.00110357	1	-0.00159212		B3GNT2	-0.00280637	1	-0.00404873
B4GALT5	-0.0720709	1	-0.103976		B3GNT3	0.00221656	1	0.00319782
B4GALT6	-0.0236441	1	-0.0341113		B3GNT4	-0.000742287	1	-0.00107089
B4GALT7	-0.0189822	1	-0.0273856		B3GNT5	0.0120766	1	0.0174229
B9D1	0.0199347	1	0.0287596		B3GNT6	0.0010295	1	0.00148525
B9D2	-0.000794562	1	-0.00114631		B3GNT7	-0.000576367	1	-0.000831522
BAALC	-0.29845	8.04e-08	-0.430573		B3GNT9	0.00766479	1	0.0110579
BAAT	5.56e-05	1	8.02138e-05		B3GNTL1	-0.00729887	1	-0.01053
BACE1	-0.0296424	1	-0.0427649		B4GALNT1	0.00773176	1	0.0111546
BACE1-AS	0.00404757	1	0.00583941		B4GALNT2	-0.000977079	1	-0.00140963
BACE2	-0.00824272	1	-0.0118917		B4GALNT3	-0.00756884	1	-0.0109195
BACH1	-0.0390591	1	-0.0563503		B4GALNT4	-0.117843	1	-0.170011
BACH2	-0.15024	1	-0.216751		B4GALT1	0.00361817	1	0.00521992
BAD	-0.0225369	1	-0.0325138		B4GALT2	-0.023118	1	-0.0333522
BAG1	-0.0040999	1	-0.00591491		B4GALT3	-0.0109725	1	-0.01583
BAG2	0.00424562	1	0.00612514		B4GALT4	0.00684866	1	0.00988052
BAG3	-0.0526832	1	-0.0760058		B4GALT4-AS1	-0.0129387	1	-0.0186666
BAG4	-0.0265885	1	-0.0383591		B4GALT5	0.0458559	1	0.066156
BAG5	0.0192885	1	0.0278275		B4GALT6	-0.010345	1	-0.0149246
BAG6	0.022153	1	0.03196		B4GALT7	-0.0126832	1	-0.0182979
BAHCC1	0.0100036	1	0.0144321		B9D1	-0.0132241	1	-0.0190783
BAHD1	-0.0199001	1	-0.0287098		B9D2	0.00451672	1	0.00651624
BAIAP2	-0.00496031	0.268216	-0.00715621		BAALC	-0.0495567	1	-0.0714951
BAIAP2-AS1	0.000486235	1	0.000701489		BAAT	-0.000484193	1	-0.000698543
BAIAP2L1	-0.0216175	1	-0.0311874		BACE1	-0.0307936	1	-0.0444258
BAIAP2L2	-0.0229798	1	-0.0331528		BACE1-AS	-0.00758631	1	-0.0109447
BAIAP3	0.201656	1.04e-09	0.290928		BACE2	0.00558974	1	0.00806429
BAK1	0.0169823	1	0.0245003		BACH1	0.00165776	1	0.00239164
BAMBI	0.0172003	1	0.0248148		BACH2	-0.0792641	1	-0.114354
BANF1	-0.0304823	1	-0.0439766		BAD	-0.00533066	1	-0.00769052
BANF2	-0.00513401	1	-0.00740681		BAG1	0.0123672	1	0.017842
BANK1	0.0138861	1	0.0200334		BAG2	-0.00492511	1	-0.00710543
BANP	-0.0202404	1	-0.0292007		BAG3	0.0429347	1	0.0619416
BAP1	-0.0144624	1	-0.0208648		BAG4	-0.0312808	1	-0.0451287
BARD1	-0.0444519	1	-0.0641305		BAG5	0.00392296	1	0.00565964
BARX2	0.00299066	1	0.00431461		BAG6	0.0154443	1	0.0222815
BASP1	0.161141	1	0.232478		BAHCC1	-0.00937604	1	-0.0135268
BATF	0.000778119	1	0.00112259		BAHD1	-0.00368443	1	-0.00531551
BATF2	-0.00301948	1	-0.00435619		BAIAP2	0.0379031	1	0.0546826
BATF3	-0.00593698	1	-0.00856525		BAIAP2-AS1	-0.00664683	1	-0.00958935
BAX	-0.00536654	1	-0.00774228		BAIAP2L1	0.0071855	1	0.0103665
BAZ1A	0.0457945	1	0.0660676		BAIAP2L2	0.0272357	1	0.0392928
BAZ1B	0.0732272	1	0.105645		BAIAP3	0.187674	7.45e-16	0.270756
BAZ2A	0.00666758	1	0.00961929		BAK1	0.0033748	1	0.00486881
BAZ2B	0.0222328	0.416479	0.0320751		BAMBI	0.0299713	0.145736	0.0432395
BBC3	-0.00720805	1	-0.010399		BANF1	-0.00638447	1	-0.00921084
BBIP1	-0.00342284	1	-0.00493812		BANF2	0.00147025	1	0.00212113
BBOX1	-0.00385978	1	-0.00556848		BANK1	0.00336654	1	0.00485689
BBS1	0.0061212	1	0.00883102		BANP	0.0600529	1	0.086638
BBS10	0.0160249	1	0.023119		BAP1	-0.051122	1	-0.0737534
BBS12	0.0339861	1	0.0490316		BARD1	-0.012463	1	-0.0179803
BBS2	-0.108029	0.42928	-0.155852		BARX2	0.00287757	1	0.00415145
BBS4	0.00897688	1	0.0129509		BASP1	-0.0711937	1	-0.102711
BBS7	-0.00252541	1	-0.00364339		BATF	0.0011997	1	0.0017308
BBS9	0.014296	1	0.0206247		BATF2	0.00090526	1	0.00130601
BBX	0.00762765	1	0.0110044		BATF3	0.00383453	1	0.00553206
BCAM	-0.0303506	1	-0.0437867		BAX	0.0253662	1	0.0365957
BCAN	0.0101103	0.0233851	0.014586		BAZ1A	0.0217425	1	0.0313677
BCAP29	-0.0175831	1	-0.025367		BAZ1B	0.0323806	1	0.0467154
BCAP31	-0.0253113	1	-0.0365165		BAZ2A	-0.00887849	1	-0.0128089
BCAR1	0.00917398	1	0.0132352		BAZ2B	-0.200798	0.000971499	-0.289691
BCAR3	-0.00906008	1	-0.0130709		BBC3	0.00487304	1	0.0070303
BCAR4	-0.000722115	1	-0.00104179		BBIP1	-0.0365784	1	-0.0527715
BCAS1	0.0287577	1	0.0414886		BBOX1	-0.00030139	1	-0.000434814
BCAS2	0.00811687	1	0.0117102		BBS10	-0.0166726	1	-0.0240535
BCAS3	0.0507147	1	0.0731659		BBS12	-0.00452385	1	-0.00652653
BCAS4	-0.0114513	1	-0.0165207		BBS2	-0.0640524	1	-0.0924081
BCAT1	0.00646011	1	0.00931997		BBS4	0.01297	1	0.0187118
BCAT2	0.0165033	1	0.0238093		BBS7	-0.00503656	1	-0.00726622
BCCIP	-0.0134669	1	-0.0194286		BBS9	0.0354343	1	0.0511209
BCDIN3D	0.004087	1	0.0058963		BBX	0.0054339	1	0.00783946
BCDIN3D-AS1	-0.00163624	1	-0.0023606		BCAM	-0.0583146	1	-0.0841301
BCHE	-0.00567666	1	-0.00818969		BCAN	0.0757769	0.545255	0.109323
BCKDHA	-0.00219041	1	-0.00316009		BCAP29	-0.0305806	1	-0.0441184
BCKDHB	0.173475	0.000121875	0.250272		BCAP31	-0.0282357	1	-0.0407355
BCKDK	-0.00417781	1	-0.00602731		BCAR1	-0.0174709	1	-0.0252052
BCL10	-0.0151937	1	-0.0219199		BCAR3	0.0310076	1	0.0447345
BCL11A	-0.0238971	1	-0.0344762		BCAR4	-0.000449401	1	-0.000648349
BCL11B	0.00416712	1	0.00601188		BCAS1	-0.0143286	1	-0.0206718
BCL2	-0.186943	0.140158	-0.269701		BCAS2	0.0393125	1	0.0567159
BCL2A1	-0.00684774	1	-0.0098792		BCAS3	0.029354	1	0.0423489
BCL2L1	-0.000922527	1	-0.00133093		BCAS4	0.00798653	1	0.0115221
BCL2L10	-0.000751492	1	-0.00108417		BCAT1	0.0201002	1	0.0289985
BCL2L11	0.00913276	1	0.0131758		BCAT2	-0.0630019	1	-0.0908925
BCL2L12	0.00482405	1	0.00695963		BCCIP	-0.00160589	1	-0.00231681
BCL2L13	-0.0378106	0.564049	-0.0545492		BCDIN3D	0.00586458	1	0.0084608
BCL2L14	-0.0152606	1	-0.0220164		BCDIN3D-AS1	-0.00150275	1	-0.00216801
BCL2L15	0.00142106	1	0.00205016		BCHE	-0.00357105	1	-0.00515194
BCL2L2	-0.00537918	1	-0.00776051		BCKDHA	0.000302772	1	0.000436808
BCL2L2-PABPN1	-0.0170691	1	-0.0246255		BCKDHB	0.196316	2.66e-07	0.283225
BCL3	-0.00263823	1	-0.00380616		BCKDK	-0.00808871	1	-0.0116695
BCL6	0.0393798	0.234546	0.0568131		BCL10	-0.00447636	1	-0.00645802
BCL7A	0.0323178	1	0.0466247		BCL11A	-0.0191066	1	-0.0275649
BCL7B	-0.00203717	1	-0.00293901		BCL11B	-0.0124845	1	-0.0180114
BCL7C	-0.0152076	1	-0.0219399		BCL2	0.02378	1	0.0343073
BCL9	-0.0128719	1	-0.0185702		BCL2A1	0.0113855	1	0.0164257
BCL9L	0.0107035	1	0.0154418		BCL2L1	0.00557188	1	0.00803852
BCLAF1	0.016886	1	0.0243614		BCL2L11	-8.36e-05	1	-0.000120609
BCO2	0.0329843	1	0.0475863		BCL2L12	-0.0090504	1	-0.013057
BCOR	-0.385419	3.03e-07	-0.556043		BCL2L13	0.0727789	1	0.104998
BCORL1	-0.0230244	1	-0.0332172		BCL2L14	-0.00686086	1	-0.00989813
BCR	-0.102641	0.0103456	-0.14808		BCL2L15	-0.00200131	1	-0.00288729
BCS1L	-0.0106856	1	-0.015416		BCL2L2	0.00732688	1	0.0105704
BCYRN1	-0.459164	0.00377507	-0.662434		BCL2L2-PABPN1	0.00887552	1	0.0128047
BDH1	0.0344861	1	0.049753		BCL3	-0.0126657	1	-0.0182728
BDH2	0.0107692	1	0.0155367		BCL6	0.161755	4.73e-10	0.233363
BDNF	0.00661927	1	0.00954959		BCL6B	-0.00116794	1	-0.00168498
BDNF-AS	-0.0739125	1	-0.106633		BCL7A	-0.00861874	1	-0.0124342
BDP1	-0.00763193	1	-0.0110105		BCL7B	0.012353	1	0.0178216
BEAN1	0.051017	1	0.073602		BCL7C	-0.0279749	1	-0.0403592
BECN1	-0.00486735	1	-0.00702211		BCL9	-0.0436323	1	-0.0629481
BEGAIN	-0.017482	1	-0.0252212		BCL9L	-0.00267417	1	-0.00385801
BEND2	0.00477496	1	0.00688881		BCLAF1	0.0192158	1	0.0277225
BEND3	-0.00162604	1	-0.00234587		BCO2	0.0167598	1	0.0241792
BEND6	-0.0164253	1	-0.0236967		BCOR	-0.136664	0.102219	-0.197165
BEND7	0.00786606	1	0.0113483		BCORL1	0.00913822	1	0.0131837
BEST1	0.0348882	1	0.050333		BCR	-0.163255	0.458359	-0.235527
BEST2	-0.00151509	1	-0.00218581		BCS1L	0.0133079	1	0.0191992
BEST3	0.00495555	1	0.00714935		BCYRN1	-0.44941	2.86e-09	-0.648362
BEST4	-0.00316371	1	-0.00456427		BDH1	-0.0376588	1	-0.0543302
BET1	-0.0228102	1	-0.0329081		BDH2	-0.00228581	1	-0.00329773
BET1L	0.000541693	1	0.000781498		BDNF	-0.0073985	1	-0.0106738
BEX1	0.0210287	1	0.030338		BDNF-AS	0.0318814	1	0.0459951
BEX2	0.0691912	1	0.0998218		BDP1	0.00982922	1	0.0141806
BEX4	0.0187568	1	0.0270604		BEAN1	-0.00214386	1	-0.00309293
BEX5	0.00358375	1	0.00517026		BECN1	-0.0116128	1	-0.0167538
BFAR	-0.00846824	1	-0.0122171		BEGAIN	-0.0305444	1	-0.0440663
BFSP1	-0.00140707	1	-0.00202997		BEND2	0.00137576	1	0.0019848
BFSP2	-1.33e-05	1	-1.91878e-05		BEND3	0.00150985	1	0.00217826
BGN	0.0249493	1	0.0359943		BEND4	-0.000954238	1	-0.00137667
BHLHB9	0.00288937	1	0.00416848		BEND6	0.00670168	1	0.00966848
BHLHE22	0.053282	1	0.0768697		BEND7	-0.0116584	1	-0.0168196
BHLHE40	-0.0520926	1	-0.0751538		BEST1	0.0109593	1	0.0158109
BHLHE40-AS1	-0.0171024	1	-0.0246736		BEST2	-0.000577226	1	-0.000832761
BHLHE41	0.0290593	1	0.0419237		BEST3	-0.000190706	1	-0.000275131
BHMT	0.00637088	1	0.00919123		BEST4	-0.00264746	1	-0.00381948
BHMT2	-0.00518451	1	-0.00747967		BET1	-0.00574823	1	-0.00829294
BICC1	0.0447404	1	0.0645467		BET1L	-0.00146717	1	-0.00211667
BICD1	0.159191	4.5e-07	0.229664		BEX1	-0.0248077	1	-0.03579
BICD2	-0.00842375	1	-0.0121529		BEX2	0.034764	1	0.0501538
BID	0.0785632	0.00810937	0.113343		BEX4	-0.0245333	1	-0.0353941
BIK	-0.000246096	1	-0.000355041		BEX5	0.00245784	1	0.00354591
BIN1	-0.0136991	1	-0.0197636		BFAR	-0.0285867	1	-0.0412419
BIN2	-0.00094611	1	-0.00136495		BFSP1	0.000436039	1	0.000629071
BIN3	-0.00749876	1	-0.0108184		BFSP2	-0.00145088	1	-0.00209318
BIRC2	-0.0317843	1	-0.045855		BGN	0.071142	0.0170319	0.102636
BIRC3	-0.00506813	1	-0.00731176		BHLHB9	0.0196119	1	0.028294
BIRC5	-0.00226128	1	-0.00326233		BHLHE22	0.00315413	1	0.00455045
BIRC6	-0.0508881	1	-0.073416		BHLHE40	0.0940546	0.0515702	0.135692
BIRC6-AS1	-0.000624997	1	-0.00090168		BHLHE40-AS1	0.00886259	1	0.012786
BIRC7	-0.0001401	1	-0.000202122		BHLHE41	-0.0210551	1	-0.0303761
BIVM	-0.0101877	1	-0.0146977		BHMT	-0.00320255	1	-0.0046203
BIVM-ERCC5	-0.00265435	1	-0.00382942		BHMT2	0.00149731	1	0.00216016
BLACE	0.0123688	1	0.0178444		BICC1	-0.0176369	1	-0.0254446
BLCAP	-0.0301976	1	-0.0435659		BICD1	0.210742	7.74e-09	0.304036
BLID	-0.00150861	1	-0.00217647		BICD2	-0.00624796	1	-0.0090139
BLK	-0.00243664	1	-0.00351533		BID	0.0412263	1	0.059477
BLM	-0.00394588	1	-0.0056927		BIK	-0.00151795	1	-0.00218993
BLMH	0.0123138	1	0.0177651		BIN1	-0.0624746	1	-0.0901319
BLNK	0.00498844	1	0.00719679		BIN2	0.00662568	1	0.00955883
BLOC1S2	0.0388188	1	0.0560036		BIN3	-0.00881276	1	-0.0127141
BLOC1S4	-0.0134052	1	-0.0193396		BIRC2	0.0020786	1	0.00299879
BLOC1S5-TXNDC5	0.00138877	1	0.00200358		BIRC3	-0.000920516	1	-0.00132802
BLVRA	-0.0150743	1	-0.0217476		BIRC5	0.0113431	1	0.0163647
BLVRB	-0.000706225	1	-0.00101887		BIRC6	-0.075743	1	-0.109274
BLZF1	-0.0173405	1	-0.0250171		BIRC7	0.00645779	1	0.00931662
BMF	-0.0037658	1	-0.00543289		BIVM	0.0017928	1	0.00258646
BMI1	-0.0104081	1	-0.0150157		BIVM-ERCC5	-0.00209612	1	-0.00302407
BMP1	0.0566172	1	0.0816814		BLACE	0.012345	1	0.0178101
BMP2	0.00829068	1	0.0119609		BLCAP	-0.0442121	1	-0.0637845
BMP2K	0.0558757	1	0.0806116		BLID	-0.00255555	1	-0.00368688
BMP3	-0.000726662	1	-0.00104835		BLK	0.00119354	1	0.00172192
BMP4	0.00994926	1	0.0143537		BLM	0.0124374	1	0.0179434
BMP5	-0.00225019	1	-0.00324634		BLMH	0.00583375	1	0.00841632
BMP6	-0.00369477	1	-0.00533043		BLNK	0.0199361	1	0.0287617
BMP7	-0.0231479	1	-0.0333954		BLOC1S2	-0.00183964	1	-0.00265404
BMP8A	-0.00274004	1	-0.00395305		BLOC1S4	-0.0103986	1	-0.015002
BMP8B	-0.00821595	1	-0.0118531		BLOC1S5-TXNDC5	0.0134953	1	0.0194695
BMPER	0.0057282	1	0.00826405		BLVRA	0.00831028	1	0.0119892
BMPR1A	-0.00880548	0.44947	-0.0127036		BLVRB	0.0108565	1	0.0156626
BMPR1B	-0.217247	0.0089094	-0.313422		BLZF1	-0.0214222	1	-0.0309057
BMPR2	-0.11841	1	-0.170829		BMF	-0.00239778	1	-0.00345926
BMS1	-0.0262275	1	-0.0378383		BMI1	-0.000489886	1	-0.000706756
BMX	-0.0125891	1	-0.0181623		BMP1	0.0169875	1	0.0245077
BNC1	-0.00162539	1	-0.00234495		BMP2	0.00716851	1	0.010342
BNC2	-0.00255735	0.182071	-0.00368948		BMP2K	-0.0156969	1	-0.0226459
BNIP1	-0.00170119	1	-0.0024543		BMP3	-0.00127569	1	-0.00184043
BNIP2	-0.0299837	1	-0.0432574		BMP4	0.00687229	1	0.00991462
BNIP3	-0.0144314	1	-0.0208201		BMP5	-0.000431077	1	-0.000621913
BNIP3L	0.0167548	1	0.0241721		BMP6	-0.00296995	1	-0.00428473
BNIPL	-0.00141104	1	-0.0020357		BMP7	-0.0113746	1	-0.01641
BOC	0.0207392	1	0.0299203		BMP8A	0.00231141	1	0.00333467
BOD1	-0.00805512	1	-0.0116211		BMP8B	-0.0012846	1	-0.00185329
BOD1L1	-0.00230349	1	-0.00332323		BMPER	-0.0223296	1	-0.0322147
BOK	-0.0133983	1	-0.0193296		BMPR1A	0.197935	3.27e-21	0.28556
BOK-AS1	-0.00324091	1	-0.00467565		BMPR1B	-0.0599798	1	-0.0865326
BOLA1	0.00338135	1	0.00487826		BMPR2	0.072655	1	0.104819
BOLA3	-0.0160648	1	-0.0231766		BMS1	0.0153902	1	0.0222033
BOLA3-AS1	-0.003188	1	-0.00459931		BMX	0.0268338	1	0.038713
BOLL	0.00166004	1	0.00239492		BNC1	5.8e-06	1	8.36763e-06
BOP1	-0.0324748	1	-0.0468512		BNC2	0.169682	2.22e-18	0.2448
BORA	-0.00234189	1	-0.00337864		BNIP1	-0.00265417	1	-0.00382916
BPGM	0.00517994	1	0.00747308		BNIP2	-0.0267303	1	-0.0385637
BPHL	-0.0255626	1	-0.036879		BNIP3	-0.0242285	1	-0.0349544
BPI	-0.00287042	1	-0.00414114		BNIP3L	0.026222	1	0.0378303
BPIFB1	0.00449974	1	0.00649175		BNIPL	0.00888399	1	0.0128169
BPIFB4	-0.00347547	1	-0.00501404		BOC	0.0769827	5.32e-05	0.111063
BPIFC	-0.000664508	1	-0.000958682		BOD1	0.0002885	1	0.000416218
BPNT1	-0.00758673	1	-0.0109453		BOD1L1	-0.00488606	1	-0.00704909
BPTF	0.0907077	0.000356411	0.130864		BOK	-0.0317362	1	-0.0457857
BRAF	-0.040049	1	-0.0577785		BOK-AS1	-0.00145426	1	-0.00209805
BRAP	-0.00917552	1	-0.0132375		BOLA1	0.0153512	1	0.0221471
BRAT1	-0.036137	1	-0.0521347		BOLA2	0.00110485	1	0.00159397
BRCA1	0.0227641	1	0.0328417		BOLA3	-0.00197457	1	-0.0028487
BRCA2	0.00565981	1	0.00816538		BOLA3-AS1	0.00239407	1	0.00345392
BRCC3	-0.0160946	1	-0.0232197		BOLL	-0.00108816	1	-0.00156988
BRD1	-0.00149635	1	-0.00215878		BOP1	0.0109415	1	0.0157853
BRD2	-0.0232239	1	-0.033505		BORA	8.66e-05	1	0.000124937
BRD3	-0.0167938	1	-0.0242284		BPGM	-0.0211306	1	-0.0304849
BRD4	-0.0456211	1	-0.0658173		BPHL	0.0126329	1	0.0182254
BRD7	-0.00671064	1	-0.0096814		BPI	0.00113068	1	0.00163123
BRD8	0.0448869	1	0.0647581		BPIFA2	-0.00071314	1	-0.00102884
BRD9	0.0235379	1	0.0339579		BPIFB1	0.00216065	1	0.00311716
BRDT	-0.0068173	1	-0.00983529		BPIFB2	0.00122342	1	0.00176503
BRE	0.0275329	1	0.0397216		BPIFB4	-0.00306482	1	-0.0044216
BRF1	-0.0723665	1	-0.104403		BPIFC	-0.000214539	1	-0.000309514
BRF2	-0.000845072	1	-0.00121918		BPNT1	-0.00644128	1	-0.0092928
BRI3	0.033139	1	0.0478095		BPTF	-0.0659825	1	-0.0951926
BRI3BP	0.00241478	1	0.00348379		BRAF	-0.0260411	1	-0.0375694
BRICD5	-0.0219062	1	-0.031604		BRAP	-0.00663546	1	-0.00957294
BRIP1	-0.00669233	1	-0.009655		BRAT1	-0.0294788	1	-0.042529
BRIX1	-0.0189179	1	-0.0272927		BRCA1	-0.0225374	1	-0.0325145
BRK1	-0.00355272	1	-0.0051255		BRCA2	0.00129696	1	0.00187111
BRMS1	0.00310322	1	0.004477		BRCC3	0.00439443	1	0.00633982
BRMS1L	0.0214204	1	0.030903		BRD1	0.0292285	1	0.0421678
BROX	-8.22e-05	1	-0.00011859		BRD2	0.0622814	1	0.089853
BRPF1	-0.007787	1	-0.0112343		BRD3	-0.012526	1	-0.0180712
BRPF3	0.00402818	1	0.00581143		BRD4	-0.0275793	1	-0.0397885
BRSK1	0.0363022	1	0.052373		BRD7	-0.00966983	1	-0.0139506
BRSK2	-0.0560143	1	-0.0808116		BRD8	-0.00274659	1	-0.0039625
BRWD1	-0.000204188	1	-0.000294581		BRD9	-0.0342425	1	-0.0494015
BRWD1-AS1	0.0220941	1	0.031875		BRDT	0.00016631	1	0.000239935
BRWD3	0.00123242	1	0.001778		BRE	-0.0118562	1	-0.0171049
BSDC1	-0.0306479	1	-0.0442155		BRF1	-0.0208145	1	-0.0300289
BSG	-0.286172	0.103203	-0.412858		BRF2	-0.00165946	1	-0.0023941
BSN	-0.0179709	1	-0.0259265		BRI3	0.0193278	1	0.0278841
BSN-AS2	0.00496557	1	0.0071638		BRI3BP	0.00619865	1	0.00894275
BSPH1	-0.00217214	1	-0.00313373		BRICD5	-0.00225116	1	-0.00324774
BSPRY	-0.00450484	1	-0.00649911		BRIP1	-0.00567512	1	-0.00818747
BST1	-0.00126078	1	-0.00181893		BRIX1	-0.0165098	1	-0.0238187
BST2	-0.029485	1	-0.0425378		BRK1	0.000224017	1	0.000323188
BTAF1	-0.00545353	1	-0.00786778		BRMS1	-0.0203484	1	-0.0293566
BTBD1	-0.00664104	1	-0.00958099		BRMS1L	-0.00258289	1	-0.00372632
BTBD10	-0.0134501	1	-0.0194043		BROX	-0.0203746	1	-0.0293944
BTBD11	-0.010021	1	-0.0144572		BRPF1	-0.0133061	1	-0.0191967
BTBD16	0.00322026	1	0.00464585		BRPF3	-0.0122228	1	-0.0176338
BTBD17	0.00560375	1	0.0080845		BRSK1	-0.0593558	1	-0.0856323
BTBD18	0.00283758	1	0.00409377		BRSK2	-0.00794071	1	-0.011456
BTBD19	-0.00160361	1	-0.00231351		BRWD1	0.0478039	1	0.0689664
BTBD2	-0.0452567	1	-0.0652917		BRWD1-AS1	0.00186556	1	0.00269143
BTBD3	0.00661664	1	0.00954579		BRWD3	0.0124948	1	0.0180262
BTBD6	-0.0164726	1	-0.0237649		BSDC1	0.00282645	1	0.00407771
BTBD7	0.0258545	1	0.0373001		BSG	-0.339385	1.29e-12	-0.489629
BTBD8	-0.0121433	1	-0.017519		BSN	0.0166255	1	0.0239856
BTBD9	0.0422947	1	0.0610183		BSN-AS2	0.000973114	1	0.00140391
BTC	0.00502207	1	0.00724532		BSPH1	-0.00191719	1	-0.00276591
BTD	0.00587423	1	0.00847473		BSPRY	0.000617462	1	0.000890809
BTF3	-0.0221612	1	-0.0319718		BST1	-0.00138651	1	-0.00200031
BTF3L4	0.0156375	1	0.0225601		BST2	0.0153022	1	0.0220764
BTG1	-0.027644	1	-0.0398819		BTAF1	-0.0160635	1	-0.0231747
BTG2	-0.0524979	1	-0.0757385		BTBD1	0.0139759	1	0.020163
BTG3	-0.000577953	1	-0.00083381		BTBD10	-0.0130432	1	-0.0188173
BTG4	-0.00119436	1	-0.0017231		BTBD11	0.00587631	1	0.00847773
BTK	0.00905136	1	0.0130584		BTBD16	0.00148377	1	0.00214063
BTLA	0.0039385	1	0.00568205		BTBD17	-0.0170986	1	-0.0246681
BTN1A1	-0.00179498	1	-0.0025896		BTBD18	-0.00421414	1	-0.00607972
BTN2A1	0.0030032	1	0.0043327		BTBD19	0.00680117	1	0.00981201
BTN2A2	-0.00376683	1	-0.00543439		BTBD2	-0.0209561	1	-0.0302332
BTN3A1	0.0141823	1	0.0204607		BTBD3	-0.00352262	1	-0.00508207
BTN3A2	0.0275787	1	0.0397877		BTBD6	-0.00909255	1	-0.0131178
BTN3A3	-0.0021002	1	-0.00302994		BTBD7	0.0224948	1	0.0324531
BTNL3	-0.0116777	1	-0.0168474		BTBD8	-0.0265239	1	-0.0382659
BTNL8	-0.000675413	1	-0.000974415		BTBD9	0.0649482	1	0.0937005
BTNL9	-0.00736378	1	-0.0106237		BTC	-0.00184331	1	-0.00265934
BTRC	-0.078316	1	-0.112986		BTD	0.0228264	1	0.0329316
BUB1B	-0.00354149	1	-0.00510929		BTF3	0.0098541	1	0.0142165
BUB3	-0.0156203	1	-0.0225354		BTF3L4	-0.00664282	1	-0.00958357
BUD13	0.00202868	1	0.00292676		BTG1	-0.00605996	1	-0.00874267
BUD31	0.0248103	1	0.0357937		BTG2	0.0701577	0.000206093	0.101216
BVES	-0.0026187	1	-0.00377798		BTG3	0.00612642	1	0.00883855
BVES-AS1	-0.00718605	1	-0.0103673		BTG4	0.00106033	1	0.00152974
BYSL	0.000838808	1	0.00121014		BTK	0.00132217	1	0.00190748
BZRAP1	0.0582281	1	0.0840054		BTLA	0.0109326	1	0.0157724
BZRAP1-AS1	0.0013422	1	0.00193638		BTN1A1	-0.00287486	1	-0.00414755
BZW1	-0.027911	1	-0.0402671		BTN2A1	-0.00264384	1	-0.00381426
BZW2	-0.0196108	1	-0.0282924		BTN2A2	0.00768411	1	0.0110858
C10orf10	-0.0343641	1	-0.049577		BTN3A1	-0.00693538	1	-0.0100056
C10orf105	0.0117131	1	0.0168984		BTN3A2	0.000157178	1	0.00022676
C10orf107	0.0255243	1	0.0368238		BTN3A3	0.0106594	1	0.0153782
C10orf11	-0.158556	1	-0.228748		BTNL3	0.000229196	1	0.00033066
C10orf111	-0.00237194	1	-0.00342199		BTNL8	-0.00010663	1	-0.000153835
C10orf12	0.00104015	1	0.00150062		BTNL9	-0.00669648	1	-0.00966097
C10orf126	0.00188863	1	0.00272472		BTRC	-0.03557	1	-0.0513166
C10orf128	-0.00549288	1	-0.00792455		BUB1	0.000515533	1	0.000743757
C10orf131	-0.00648088	1	-0.00934993		BUB1B	-0.00499411	1	-0.00720497
C10orf2	0.00285407	1	0.00411755		BUB3	-0.0157806	1	-0.0227665
C10orf25	0.00115153	1	0.0016613		BUD13	-0.00597625	1	-0.00862191
C10orf35	-0.00418722	1	-0.00604088		BUD31	0.00345265	1	0.00498112
C10orf54	-0.217992	0.281752	-0.314496		BVES	-0.00204822	1	-0.00295495
C10orf55	-0.00430193	1	-0.00620638		BVES-AS1	-0.00752958	1	-0.0108629
C10orf67	0.0016656	1	0.00240296		BYSL	-0.000147887	1	-0.000213356
C10orf76	0.00932596	1	0.0134545		BZRAP1	-0.0814426	1	-0.117497
C10orf88	0.0296099	1	0.0427181		BZRAP1-AS1	0.0109645	1	0.0158185
C10orf90	-0.002375	1	-0.00342641		BZW1	0.00579368	1	0.00835851
C10orf95	0.00128689	1	0.00185659		BZW2	-0.0007801	1	-0.00112545
C10orf99	-0.000716201	1	-0.00103326		C10orf10	-0.0163925	1	-0.0236493
C11orf1	-0.0111056	1	-0.016022		C10orf105	7.35e-07	1	1.06038e-06
C11orf16	0.00299175	1	0.00431618		C10orf107	0.0244773	1	0.0353133
C11orf24	0.030238	1	0.0436241		C10orf11	-0.035467	1	-0.0511681
C11orf42	-0.000679631	1	-0.0009805		C10orf111	-0.00206168	1	-0.00297438
C11orf49	0.072239	1	0.104219		C10orf12	-0.000384065	1	-0.000554089
C11orf53	0.000266275	1	0.000384154		C10orf126	3.11e-05	1	4.48678e-05
C11orf54	-0.0405246	1	-0.0584647		C10orf128	-0.00360799	1	-0.00520523
C11orf57	-0.00911383	1	-0.0131485		C10orf131	-0.00325837	1	-0.00470083
C11orf58	-0.00693118	1	-0.00999958		C10orf2	-0.00860511	1	-0.0124145
C11orf63	0.0111043	1	0.0160201		C10orf25	-0.000517007	1	-0.000745883
C11orf65	0.0214666	1	0.0309697		C10orf35	0.0148836	1	0.0214724
C11orf68	0.00893322	1	0.0128879		C10orf54	-0.220719	9.36e-12	-0.31843
C11orf70	0.00552207	1	0.00796667		C10orf55	-0.00186127	1	-0.00268524
C11orf72	-0.00372505	1	-0.00537411		C10orf67	-0.00351471	1	-0.00507066
C11orf73	0.0070067	1	0.0101085		C10orf76	0.022787	1	0.0328747
C11orf74	-0.00866533	1	-0.0125014		C10orf82	0.0115248	1	0.0166267
C11orf80	0.0175475	1	0.0253157		C10orf88	-0.00265658	1	-0.00383264
C11orf84	0.0103136	1	0.0148793		C10orf90	-0.087212	4.22e-06	-0.12582
C11orf85	0.00372706	1	0.00537701		C10orf95	0.00553668	1	0.00798774
C11orf87	0.0090624	1	0.0130743		C10orf99	0.00200848	1	0.00289763
C11orf88	-0.000766714	1	-0.00110613		C11orf1	-0.00512219	1	-0.00738975
C11orf94	0.000712669	1	0.00102816		C11orf24	-0.00190473	1	-0.00274794
C11orf95	-0.0168298	1	-0.0242802		C11orf42	-0.00143394	1	-0.00206874
C11orf96	-0.0199767	1	-0.0288203		C11orf45	0.00170588	1	0.00246107
C12orf10	-0.00265292	1	-0.00382735		C11orf49	0.0178431	1	0.0257422
C12orf29	0.00440721	1	0.00635827		C11orf53	0.00133683	1	0.00192864
C12orf4	-0.0314057	1	-0.0453088		C11orf54	-0.00844469	1	-0.0121831
C12orf40	-0.017518	1	-0.0252732		C11orf57	-0.0101356	1	-0.0146225
C12orf42	-0.0103503	1	-0.0149323		C11orf58	0.0100921	1	0.0145598
C12orf43	0.0112362	1	0.0162105		C11orf63	0.0243556	1	0.0351376
C12orf45	-0.00219326	1	-0.00316421		C11orf65	-0.0245009	1	-0.0353474
C12orf49	-0.0302999	1	-0.0437135		C11orf68	-0.0311582	1	-0.0449518
C12orf50	0.00729471	1	0.010524		C11orf70	0.00147001	1	0.00212077
C12orf54	0.0200181	1	0.02888		C11orf72	-0.00201553	1	-0.00290779
C12orf56	0.0164693	1	0.0237602		C11orf73	0.00313643	1	0.00452491
C12orf57	-0.0162788	1	-0.0234853		C11orf74	0.00549319	1	0.007925
C12orf60	0.00860231	1	0.0124105		C11orf80	0.0261876	1	0.0377808
C12orf65	-0.00908427	1	-0.0131058		C11orf84	0.00663243	1	0.00956857
C12orf66	0.0216345	1	0.0312121		C11orf85	0.00680646	1	0.00981964
C12orf73	-0.0246057	1	-0.0354985		C11orf86	0.000701974	1	0.00101273
C12orf75	-0.00553552	1	-0.00798606		C11orf87	0.0141126	1	0.0203602
C12orf76	-0.0543854	1	-0.0784616		C11orf88	0.000605811	1	0.000874001
C14orf1	0.057699	1	0.0832421		C11orf95	-0.00369132	1	-0.00532545
C14orf105	-0.00134437	1	-0.00193951		C11orf96	0.00227665	1	0.00328451
C14orf119	-0.0179621	1	-0.0259138		C12orf10	0.00447164	1	0.00645121
C14orf132	-0.0319948	1	-0.0461587		C12orf29	0.00820664	1	0.0118397
C14orf142	-0.0112643	1	-0.016251		C12orf4	-0.025545	1	-0.0368536
C14orf159	0.0630724	1	0.0909943		C12orf40	-0.0129808	1	-0.0187274
C14orf166	-0.0159407	1	-0.0229976		C12orf42	-0.00769425	1	-0.0111005
C14orf169	-0.00530741	1	-0.00765697		C12orf43	0.0284433	1	0.041035
C14orf177	-0.000874186	1	-0.00126118		C12orf45	0.00202955	1	0.00292803
C14orf178	-0.00587502	1	-0.00847586		C12orf49	-0.0277614	1	-0.0400512
C14orf2	-0.0395864	1	-0.057111		C12orf50	-0.0067571	1	-0.00974843
C14orf28	0.0238748	1	0.0344441		C12orf54	0.00266984	1	0.00385176
C14orf37	-0.0394266	1	-0.0568806		C12orf56	-0.0139749	1	-0.0201616
C14orf39	0.00775667	1	0.0111905		C12orf57	0.00428856	1	0.00618709
C14orf79	0.0400798	1	0.0578229		C12orf60	-0.0114283	1	-0.0164875
C14orf80	-0.0152707	1	-0.022031		C12orf65	0.048062	1	0.0693387
C14orf93	-0.013585	1	-0.0195991		C12orf66	-0.0128961	1	-0.0186052
C15orf32	0.00674168	1	0.00972618		C12orf73	-0.016134	1	-0.0232765
C15orf39	-0.0038403	1	-0.00554038		C12orf75	0.0102263	1	0.0147535
C15orf40	0.0209116	0.685697	0.0301691		C12orf76	0.0205713	1	0.0296781
C15orf41	0.0342254	1	0.0493768		C12orf77	0.000718042	1	0.00103592
C15orf43	0.000516959	1	0.000745814		C14orf1	1.62e-05	1	2.33717e-05
C15orf48	0.00767042	1	0.0110661		C14orf105	-0.000462972	1	-0.000667927
C15orf52	0.00356756	1	0.0051469		C14orf119	-0.000306686	1	-0.000442454
C15orf57	0.00424168	1	0.00611944		C14orf132	-0.0204781	1	-0.0295437
C15orf59	0.00256744	1	0.00370403		C14orf142	-0.0141682	1	-0.0204403
C15orf61	-0.00371646	1	-0.00536171		C14orf159	0.0428813	1	0.0618647
C15orf65	0.00054727	1	0.000789544		C14orf166	-0.0103088	1	-0.0148724
C16orf13	-0.0283571	1	-0.0409106		C14orf169	0.000776465	1	0.0011202
C16orf45	0.0226613	1	0.0326934		C14orf177	0.000849894	1	0.00122614
C16orf46	-0.0131939	1	-0.0190348		C14orf178	-0.000389412	1	-0.000561803
C16orf47	-0.00315262	1	-0.00454827		C14orf2	0.0519889	1	0.0750041
C16orf52	-0.00283922	1	-0.00409613		C14orf28	-0.00017288	1	-0.000249413
C16orf58	-0.00338327	1	-0.00488102		C14orf37	-0.0328498	1	-0.0473922
C16orf59	-0.00359171	1	-0.00518174		C14orf39	0.000197243	1	0.000284561
C16orf62	0.0329379	0.428119	0.0475193		C14orf79	-0.00890962	1	-0.0128539
C16orf70	0.0571975	1	0.0825185		C14orf80	-0.00155595	1	-0.00224476
C16orf71	0.000834659	1	0.00120416		C14orf93	0.0050328	1	0.0072608
C16orf72	-0.0171377	1	-0.0247244		C15orf32	0.00175905	1	0.00253778
C16orf74	-0.0193709	1	-0.0279463		C15orf39	-0.00278411	1	-0.00401663
C16orf78	0.00213299	1	0.00307726		C15orf40	0.011648	1	0.0168045
C16orf86	-0.00310521	1	-0.00447987		C15orf41	-0.00996062	1	-0.0143701
C16orf87	-0.0137684	1	-0.0198636		C15orf43	0.000945923	1	0.00136468
C16orf89	-0.0472057	1	-0.0681035		C15orf48	0.00905678	1	0.0130662
C16orf91	-0.00714512	1	-0.0103082		C15orf52	-0.0181172	1	-0.0261377
C16orf92	0.0168884	1	0.0243648		C15orf57	0.00478778	1	0.00690731
C16orf95	0.0460729	1	0.0664692		C15orf59	-0.0147154	1	-0.0212299
C16orf96	-0.0160683	1	-0.0231817		C15orf61	0.00344327	1	0.00496759
C17orf51	0.0483122	1	0.0696998		C15orf65	0.00864537	1	0.0124726
C17orf53	-0.00584863	1	-0.00843779		C16orf13	0.0135992	1	0.0196195
C17orf58	-0.0128896	1	-0.0185958		C16orf45	-0.0173529	1	-0.025035
C17orf62	-0.0613182	1	-0.0884635		C16orf46	-0.00905392	1	-0.013062
C17orf64	-0.00811083	1	-0.0117015		C16orf47	0.00579686	1	0.00836309
C17orf67	0.00242478	1	0.00349822		C16orf52	0.0012953	1	0.00186872
C17orf75	0.00556131	1	0.00802328		C16orf58	-0.0202004	1	-0.029143
C17orf77	-0.00168767	1	-0.0024348		C16orf59	-0.00312784	1	-0.00451252
C17orf78	-0.00121157	1	-0.00174792		C16orf62	0.00670273	1	0.00966999
C17orf80	-0.0151335	1	-0.021833		C16orf70	0.00846301	1	0.0122095
C17orf82	0.00201296	1	0.00290409		C16orf71	-0.00334618	1	-0.00482752
C17orf89	0.051164	1	0.0738141		C16orf72	-0.00935315	1	-0.0134937
C17orf96	-0.0108657	1	-0.0156758		C16orf74	0.00103907	1	0.00149906
C17orf97	-0.00351352	1	-0.00506893		C16orf78	-0.00157327	1	-0.00226974
C17orf98	-0.00218807	1	-0.00315672		C16orf86	-0.0102406	1	-0.0147741
C17orf99	0.00560538	1	0.00808685		C16orf87	0.00370251	1	0.00534159
C18orf21	-0.00571222	1	-0.00824099		C16orf89	-0.0115999	1	-0.0167352
C18orf25	-0.000794003	1	-0.0011455		C16orf91	-0.000549307	1	-0.000792482
C18orf32	-0.0140592	1	-0.0202831		C16orf95	0.00190701	1	0.00275124
C18orf54	-0.00178107	1	-0.00256955		C16orf96	-0.00441486	1	-0.0063693
C18orf63	0.00211738	1	0.00305473		C17orf102	0.00219859	1	0.0031719
C18orf8	-0.0211809	1	-0.0305575		C17orf107	-0.00103605	1	-0.00149471
C19orf12	-0.000765795	1	-0.00110481		C17orf49	0.00278352	1	0.00401577
C19orf18	0.10884	1	0.157023		C17orf51	0.0338135	1	0.0487826
C19orf24	0.011061	1	0.0159577		C17orf53	0.00286716	1	0.00413643
C19orf25	-0.0160535	1	-0.0231603		C17orf58	-0.0207141	1	-0.0298842
C19orf35	-0.00471513	1	-0.0068025		C17orf62	-0.0125597	1	-0.0181198
C19orf38	0.00520876	1	0.00751465		C17orf64	0.0014949	1	0.00215668
C19orf43	0.0172348	1	0.0248645		C17orf67	-0.00467263	1	-0.00674118
C19orf44	0.0537022	1	0.0774758		C17orf75	-0.0056908	1	-0.00821008
C19orf45	0.00165861	1	0.00239286		C17orf77	0.00266236	1	0.00384097
C19orf47	0.0106613	1	0.0153811		C17orf78	0.00875383	1	0.0126291
C19orf48	0.0130333	1	0.0188031		C17orf80	0.0038941	1	0.00561799
C19orf52	-0.00947225	1	-0.0136656		C17orf82	-0.00188213	1	-0.00271534
C19orf53	-0.0230848	1	-0.0333044		C17orf89	0.00417372	1	0.00602141
C19orf54	0.00381191	1	0.00549942		C17orf96	-0.00452894	1	-0.00653388
C19orf57	-0.00217434	1	-0.00313691		C17orf97	0.00445301	1	0.00642434
C19orf60	0.011539	1	0.0166472		C17orf98	-0.000940721	1	-0.00135717
C19orf66	-0.0317743	1	-0.0458406		C17orf99	0.00922548	1	0.0133095
C19orf70	-0.016761	1	-0.024181		C18orf21	-0.00412315	1	-0.00594845
C19orf71	-0.00155564	1	-0.00224431		C18orf25	-0.0173323	1	-0.0250053
C19orf73	-0.00522166	1	-0.00753326		C18orf32	-0.00202335	1	-0.00291908
C19orf81	-0.00684964	1	-0.00988195		C18orf42	8.8e-05	1	0.000126957
C1D	-0.00724249	1	-0.0104487		C18orf54	-0.00284143	1	-0.00409932
C1GALT1	-0.0224295	1	-0.032359		C18orf63	0.000517339	1	0.000746362
C1GALT1C1	-0.00763146	1	-0.0110099		C18orf8	-0.00745803	1	-0.0107597
C1orf100	0.000858726	1	0.00123888		C19orf12	0.0137092	1	0.0197781
C1orf101	0.033663	1	0.0485654		C19orf18	0.067337	0.0111244	0.0971468
C1orf105	-0.00201987	1	-0.00291405		C19orf24	0.0100284	1	0.014468
C1orf106	-0.00306826	1	-0.00442656		C19orf25	-0.0117789	1	-0.0169933
C1orf109	0.00098929	1	0.00142724		C19orf35	-0.00048921	1	-0.000705781
C1orf112	-0.00316869	1	-0.00457145		C19orf38	0.00149249	1	0.00215321
C1orf115	0.0908978	1	0.131138		C19orf43	0.00272011	1	0.00392429
C1orf122	0.0120165	1	0.0173362		C19orf44	-0.0177078	1	-0.025547
C1orf123	0.01823	1	0.0263003		C19orf45	-0.000804536	1	-0.0011607
C1orf127	0.000682324	1	0.000984385		C19orf47	-0.00479562	1	-0.00691862
C1orf131	0.0109479	1	0.0157945		C19orf48	0.0149409	1	0.0215552
C1orf132	0.00612659	1	0.0088388		C19orf52	0.00460447	1	0.00664285
C1orf137	-0.000512092	1	-0.000738793		C19orf53	0.0658494	0.00109465	0.0950005
C1orf141	0.000601064	1	0.000867152		C19orf54	0.015426	1	0.022255
C1orf143	-0.00334143	1	-0.00482066		C19orf57	-0.00112884	1	-0.00162857
C1orf146	-0.00543332	1	-0.00783862		C19orf60	-0.0866815	1	-0.125055
C1orf147	0.0015568	1	0.00224598		C19orf66	0.00652967	1	0.00942032
C1orf158	-0.00119523	1	-0.00172435		C19orf70	-0.0121827	1	-0.017576
C1orf159	-0.0188416	1	-0.0271827		C19orf71	0.00960824	1	0.0138618
C1orf162	-0.00429778	1	-0.00620038		C19orf73	0.00706533	1	0.0101931
C1orf167	-0.00213293	1	-0.00307717		C19orf81	-0.00812123	1	-0.0117165
C1orf168	0.0251589	1	0.0362966		C1D	0.022634	1	0.0326539
C1orf174	-0.00199095	1	-0.00287233		C1GALT1	0.0113934	1	0.0164372
C1orf185	0.00616962	1	0.00890088		C1GALT1C1	-0.0054486	1	-0.00786067
C1orf186	-0.00618977	1	-0.00892995		C1orf100	-0.00300528	1	-0.00433571
C1orf189	-0.00643332	1	-0.00928131		C1orf101	-0.0240247	1	-0.0346604
C1orf194	0.00044912	1	0.000647943		C1orf105	-0.00189557	1	-0.00273473
C1orf195	0.00406799	1	0.00586888		C1orf106	-0.00181512	1	-0.00261866
C1orf198	-0.0728503	1	-0.105101		C1orf109	-0.00148665	1	-0.00214478
C1orf204	-0.00119345	1	-0.00172179		C1orf112	-0.0110285	1	-0.0159108
C1orf21	0.00741199	1	0.0106932		C1orf115	-0.00996718	1	-0.0143796
C1orf216	-0.0281851	1	-0.0406625		C1orf122	-0.0179204	1	-0.0258537
C1orf220	-0.000811574	1	-0.00117085		C1orf123	0.0206836	1	0.0298401
C1orf226	0.0220595	1	0.0318252		C1orf127	-0.00113773	1	-0.00164139
C1orf228	0.00648036	1	0.00934918		C1orf131	0.0340002	1	0.0490519
C1orf229	-0.000551067	1	-0.000795022		C1orf132	-0.0022046	1	-0.00318056
C1orf233	-0.0293611	1	-0.0423591		C1orf137	-0.000347043	1	-0.000500677
C1orf234	-0.000622234	1	-0.000897694		C1orf141	-0.00395262	1	-0.00570242
C1orf27	-0.0106544	1	-0.0153711		C1orf143	-0.000226359	1	-0.000326567
C1orf35	0.0378999	1	0.054678		C1orf146	-0.00237238	1	-0.00342262
C1orf43	-0.0542444	1	-0.0782581		C1orf147	0.00811393	1	0.0117059
C1orf50	0.0273675	1	0.039483		C1orf158	0.00378446	1	0.00545982
C1orf52	0.0385213	1	0.0555745		C1orf159	-0.0113078	1	-0.0163137
C1orf53	-0.00177672	1	-0.00256326		C1orf162	-0.00105707	1	-0.00152503
C1orf54	-0.00545398	1	-0.00786842		C1orf167	0.00587907	1	0.00848171
C1orf56	-0.0954314	1	-0.137678		C1orf168	0.0571418	3.14e-08	0.0824382
C1orf61	-0.119796	1	-0.17283		C1orf174	-0.00797417	1	-0.0115043
C1orf64	-0.00965799	1	-0.0139335		C1orf185	-0.00191646	1	-0.00276486
C1orf74	-0.000488229	1	-0.000704366		C1orf186	-0.00825403	1	-0.0119081
C1orf87	-0.0239187	1	-0.0345073		C1orf189	-0.00153272	1	-0.00221125
C1orf94	-0.00115325	1	-0.00166379		C1orf194	-0.00494081	1	-0.00712808
C1orf95	-0.00251478	1	-0.00362806		C1orf195	-0.000394335	1	-0.000568905
C1QA	-0.00987534	1	-0.0142471		C1orf198	0.0600065	1	0.0865711
C1QB	-0.0185969	1	-0.0268297		C1orf204	0.00248688	1	0.00358782
C1QBP	-0.0217972	1	-0.0314468		C1orf21	-0.124272	1	-0.179287
C1QC	-0.00196913	1	-0.00284086		C1orf216	0.00474936	1	0.00685187
C1QL1	0.0147564	1	0.021289		C1orf220	-0.00172859	1	-0.00249383
C1QL2	-0.0210734	1	-0.0304025		C1orf226	-0.00451795	1	-0.00651803
C1QTNF1	0.000608397	1	0.000877731		C1orf228	0.0694628	0.207444	0.100214
C1QTNF2	-0.00657065	1	-0.00947945		C1orf229	-0.000754721	1	-0.00108883
C1QTNF3-AMACR	0.0832616	0.36583	0.120121		C1orf233	-0.0374229	1	-0.0539899
C1QTNF4	0.0503661	1	0.0726629		C1orf234	-0.000141569	1	-0.000204241
C1QTNF5	-0.00150028	1	-0.00216445		C1orf27	-0.000689792	1	-0.000995159
C1QTNF6	-0.0263672	1	-0.0380398		C1orf35	0.015877	1	0.0229056
C1QTNF7	-0.0161761	1	-0.0233371		C1orf43	-0.0298723	1	-0.0430967
C1QTNF8	-0.00616619	1	-0.00889593		C1orf50	-0.00505401	1	-0.00729139
C1QTNF9B	-0.00157012	1	-0.0022652		C1orf52	0.0158249	1	0.0228304
C1R	-0.0101134	1	-0.0145905		C1orf53	-1.94e-05	1	-2.79883e-05
C1RL	-0.0597105	1	-0.0861441		C1orf54	-0.024478	1	-0.0353142
C1RL-AS1	-0.00377702	1	-0.00544909		C1orf56	-0.0497738	1	-0.0718085
C1S	-0.0278863	1	-0.0402315		C1orf61	-0.206939	4.41e-05	-0.298551
C2	0.0288086	1	0.0415621		C1orf64	0.000570281	1	0.000822742
C20orf144	-0.00251524	1	-0.00362872		C1orf74	-0.00100195	1	-0.00144551
C20orf173	-0.00228616	1	-0.00329824		C1orf87	0.020177	1	0.0291093
C20orf194	0.0333061	0.54745	0.0480505		C1orf94	-0.00407047	1	-0.00587245
C20orf196	0.00369038	1	0.0053241		C1orf95	0.0376074	0.000125474	0.054256
C20orf197	-0.00168691	1	-0.00243369		C1QA	-0.00119155	1	-0.00171905
C20orf203	-0.00630448	1	-0.00909544		C1QB	-0.00959343	1	-0.0138404
C20orf24	0.00881271	1	0.012714		C1QBP	-0.00173335	1	-0.00250069
C20orf27	0.00723943	1	0.0104443		C1QC	0.00380086	1	0.00548348
C20orf85	-0.00292984	1	-0.00422687		C1QL1	0.0282646	0.0746193	0.0407772
C20orf96	0.0122625	1	0.017691		C1QL2	-0.010689	1	-0.0154209
C21orf2	0.0285435	1	0.0411796		C1QL3	0.000701372	1	0.00101187
C21orf33	-0.000496377	1	-0.000716121		C1QTNF1	0.00797354	1	0.0115034
C21orf58	-0.0101406	1	-0.0146298		C1QTNF1-AS1	0.00115448	1	0.00166556
C21orf59	-0.00139613	1	-0.00201419		C1QTNF2	-0.00249904	1	-0.00360535
C21orf62	0.0136049	1	0.0196277		C1QTNF3-AMACR	0.0364968	1	0.0526537
C21orf91	0.0073559	1	0.0106123		C1QTNF4	-0.0427446	1	-0.0616674
C21orf91-OT1	0.00139667	1	0.00201497		C1QTNF5	0.00164922	1	0.00237932
C22orf23	-0.00737479	1	-0.0106396		C1QTNF6	0.0167253	1	0.0241296
C22orf31	-0.0102204	1	-0.014745		C1QTNF7	-0.0300626	1	-0.0433712
C22orf34	-0.00504476	1	-0.00727805		C1QTNF8	-0.00392013	1	-0.00565555
C22orf39	0.000390925	1	0.000563986		C1QTNF9B	-0.000827903	1	-0.00119441
C22orf46	-0.0168457	1	-0.0243031		C1R	0.012977	1	0.0187219
C2CD2	0.0475699	1	0.0686289		C1RL	0.0102372	1	0.0147691
C2CD2L	0.0179823	1	0.025943		C1RL-AS1	-0.00472485	1	-0.00681651
C2CD3	0.0260728	1	0.0376151		C1S	-0.00855007	1	-0.0123351
C2CD4A	-0.00737061	1	-0.0106335		C2	-0.00655687	1	-0.00945956
C2CD4B	-0.007411	1	-0.0106918		C20orf144	-0.000807244	1	-0.00116461
C2CD4C	0.0192167	1	0.0277238		C20orf166-AS1	1.03e-06	1	1.48598e-06
C2CD5	0.0476337	1	0.0687208		C20orf173	-0.000391041	1	-0.000564153
C2orf16	0.00208743	1	0.00301153		C20orf194	-0.0359725	1	-0.0518973
C2orf27B	-0.0039208	1	-0.00565652		C20orf195	0.000253498	1	0.00036572
C2orf40	-0.0074443	1	-0.0107399		C20orf196	0.0114767	1	0.0165574
C2orf42	-0.00770812	1	-0.0111205		C20orf203	0.00667816	1	0.00963455
C2orf44	0.0120725	1	0.0174169		C20orf24	0.00953259	1	0.0137526
C2orf47	0.0147046	1	0.0212142		C20orf27	0.0199537	1	0.028787
C2orf48	-0.00166196	1	-0.00239771		C20orf85	0.000248675	1	0.000358762
C2orf49	0.0230276	1	0.0332218		C20orf96	0.0354965	1	0.0512106
C2orf50	-0.00529455	1	-0.00763842		C21orf2	-0.0640611	1	-0.0924207
C2orf61	0.0119848	1	0.0172904		C21orf33	-0.0128795	1	-0.0185812
C2orf68	-0.00337441	1	-0.00486825		C21orf58	-0.0102956	1	-0.0148535
C2orf69	0.00340694	1	0.00491518		C21orf59	0.00042647	1	0.000615266
C2orf70	0.000193906	1	0.000279747		C21orf62	0.00874382	1	0.0126147
C2orf71	-0.000679235	1	-0.000979929		C21orf91	-0.0012675	1	-0.00182862
C2orf72	-0.00101699	1	-0.00146721		C21orf91-OT1	0.00505191	1	0.00728837
C2orf73	0.00964302	1	0.0139119		C22orf23	-0.00225908	1	-0.00325917
C2orf74	0.0165316	1	0.02385		C22orf31	-0.00167151	1	-0.00241149
C2orf76	-0.00409615	1	-0.00590949		C22orf34	0.00410996	1	0.00592942
C2orf78	-0.00209961	1	-0.0030291		C22orf39	0.00241907	1	0.00348998
C2orf80	-0.0176305	1	-0.0254354		C22orf46	-0.00300854	1	-0.00434041
C2orf81	-0.00138625	1	-0.00199994		C2CD2	0.0347554	1	0.0501414
C2orf82	0.105953	0.692512	0.152857		C2CD2L	0.0039484	1	0.00569634
C2orf83	-0.00225966	1	-0.00326		C2CD3	-0.0224296	1	-0.0323591
C2orf88	0.0455279	1	0.0656829		C2CD4C	0.0054362	1	0.00784278
C2orf91	-0.00775642	1	-0.0111901		C2CD5	-0.0472323	1	-0.0681418
C3	0.0354155	1	0.0510937		C2orf27B	-0.000717203	1	-0.00103471
C3AR1	0.00293142	1	0.00422914		C2orf40	0.0063563	1	0.00917021
C3orf14	0.00162125	1	0.00233897		C2orf42	-0.00445633	1	-0.00642913
C3orf17	-0.0151891	1	-0.0219133		C2orf44	-1.93e-05	1	-2.7844e-05
C3orf18	-0.0252445	1	-0.0364201		C2orf47	-0.00431768	1	-0.00622909
C3orf20	-0.000420878	1	-0.000607199		C2orf48	0.00252278	1	0.0036396
C3orf22	0.00551178	1	0.00795181		C2orf49	0.00865567	1	0.0124875
C3orf33	-0.0258367	1	-0.0372745		C2orf50	0.00762434	1	0.0109996
C3orf35	0.0168288	1	0.0242789		C2orf61	-0.00572144	1	-0.00825429
C3orf38	-0.0110745	1	-0.0159771		C2orf68	-0.0121651	1	-0.0175505
C3orf49	-0.0041352	1	-0.00596584		C2orf69	-0.000501199	1	-0.000723077
C3orf52	0.00318578	1	0.00459611		C2orf70	3.17e-05	1	4.57334e-05
C3orf58	-0.04482	1	-0.0646616		C2orf71	-0.000799751	1	-0.0011538
C3orf62	-0.0264464	1	-0.0381541		C2orf72	-0.202573	8.98e-06	-0.292251
C3orf67	0.00947082	1	0.0136635		C2orf73	0.00561358	1	0.00809869
C3orf70	-0.0487788	1	-0.070373		C2orf74	0.000424305	1	0.000612143
C3orf79	-0.00244944	1	-0.00353379		C2orf76	0.0302783	1	0.0436824
C3orf80	0.00759068	1	0.010951		C2orf78	-0.000687611	1	-0.000992013
C4A	0.000309518	1	0.00044654		C2orf80	-0.00895493	1	-0.0129192
C4B	-0.00261229	1	-0.00376874		C2orf81	-0.000724344	1	-0.00104501
C4BPA	0.00149984	1	0.00216381		C2orf82	0.0871403	1	0.125717
C4BPB	-0.0012579	1	-0.00181477		C2orf83	0.00904845	1	0.0130542
C4orf17	0.00133428	1	0.00192496		C2orf88	0.0121673	1	0.0175538
C4orf19	-0.179163	0.170691	-0.258477		C2orf91	0.000329704	1	0.000475662
C4orf22	0.0597806	1	0.0862452		C3	0.110184	2.54e-17	0.158962
C4orf26	0.00267749	1	0.00386281		C3AR1	0.00189461	1	0.00273334
C4orf27	0.00526105	1	0.0075901		C3orf14	-0.0183565	1	-0.0264829
C4orf3	-0.00878839	1	-0.012679		C3orf17	-0.00973007	1	-0.0140375
C4orf32	-0.00122574	1	-0.00176836		C3orf18	-0.0181096	1	-0.0261266
C4orf33	-0.00368459	1	-0.00531573		C3orf20	0.000597651	1	0.000862228
C4orf36	-0.0167537	1	-0.0241704		C3orf22	0.00376074	1	0.0054256
C4orf45	0.00549521	1	0.00792791		C3orf33	0.000237309	1	0.000342365
C4orf46	-0.00395635	1	-0.0057078		C3orf35	0.00357499	1	0.00515762
C4orf47	-0.0100217	1	-0.0144583		C3orf38	0.0225657	1	0.0325554
C4orf48	0.0207238	1	0.0298981		C3orf49	-0.00449445	1	-0.00648413
C4orf50	0.0184591	1	0.0266309		C3orf52	0.00342521	1	0.00494153
C4orf51	-0.00746459	1	-0.0107691		C3orf58	-0.0518879	1	-0.0748584
C5	0.0189747	1	0.0273747		C3orf62	0.0164952	1	0.0237975
C5AR1	0.0101262	1	0.014609		C3orf67	0.00276955	1	0.00399561
C5AR2	0.00302124	1	0.00435872		C3orf70	0.0135847	1	0.0195986
C5orf15	-0.0206009	1	-0.0297209		C3orf79	0.00613659	1	0.00885323
C5orf17	-0.0241205	1	-0.0347986		C3orf80	0.00301139	1	0.00434452
C5orf22	-0.0110521	1	-0.0159448		C4A	-0.00149995	1	-0.00216397
C5orf24	0.0219254	1	0.0316317		C4B	-0.0013029	1	-0.00187969
C5orf28	0.000638242	1	0.000920789		C4BPA	-0.00322782	1	-0.00465677
C5orf30	-0.0111879	1	-0.0161408		C4BPB	-0.00121176	1	-0.00174819
C5orf34	-0.0027733	1	-0.00400103		C4orf17	0.000878469	1	0.00126736
C5orf38	-0.00469116	1	-0.00676792		C4orf19	-0.0619761	1	-0.0894126
C5orf42	-0.0273435	1	-0.0394484		C4orf22	-0.00306957	1	-0.00442846
C5orf45	-0.0219087	1	-0.0316075		C4orf26	0.000505942	1	0.00072992
C5orf46	-0.0023099	1	-0.00333248		C4orf27	0.0144485	1	0.0208447
C5orf47	-0.000262181	1	-0.000378247		C4orf3	-0.00852946	1	-0.0123054
C5orf49	0.00046945	1	0.000677273		C4orf32	0.00147063	1	0.00212167
C5orf51	-0.0300168	1	-0.0433051		C4orf33	-0.00277812	1	-0.00400797
C5orf52	-0.00266412	1	-0.00384351		C4orf36	-0.0213703	1	-0.0308309
C5orf56	-0.0121403	1	-0.0175147		C4orf45	-0.000803471	1	-0.00115916
C5orf63	0.0135653	1	0.0195706		C4orf46	-0.00297417	1	-0.00429082
C6	-0.00844001	1	-0.0121764		C4orf47	0.0360972	1	0.0520772
C6orf1	-0.102948	1	-0.148522		C4orf48	0.0516674	1	0.0745403
C6orf10	-0.0119002	1	-0.0171683		C4orf50	0.0153206	1	0.0221029
C6orf106	0.0387768	1	0.0559431		C4orf51	-0.00267968	1	-0.00386597
C6orf118	-0.000532409	1	-0.000768104		C5	-0.00080497	1	-0.00116133
C6orf120	-0.0072579	1	-0.0104709		C5AR1	0.014076	1	0.0203073
C6orf132	-1.7e-05	1	-2.45258e-05		C5AR2	-0.00246841	1	-0.00356116
C6orf136	-0.0119806	1	-0.0172844		C5orf15	0.0179237	1	0.0258584
C6orf141	-0.00158806	1	-0.00229108		C5orf17	0.00586838	1	0.00846628
C6orf201	-0.00716763	1	-0.0103407		C5orf22	-0.00307005	1	-0.00442915
C6orf203	0.00251463	1	0.00362784		C5orf24	0.0108943	1	0.0157171
C6orf222	0.00160832	1	0.00232031		C5orf28	0.0175026	1	0.0252509
C6orf223	-0.00368281	1	-0.00531318		C5orf30	-0.0161745	1	-0.0233349
C6orf226	0.00346502	1	0.00499896		C5orf34	0.00970834	1	0.0140062
C6orf25	-0.00100949	1	-0.00145639		C5orf42	-0.0238156	1	-0.0343587
C6orf47	-0.0240968	1	-0.0347643		C5orf45	-0.0099112	1	-0.0142988
C6orf48	0.0198929	1	0.0286994		C5orf46	-0.000891576	1	-0.00128627
C6orf52	-0.00139849	1	-0.0020176		C5orf47	-0.00384652	1	-0.00554936
C6orf58	-0.00296919	1	-0.00428363		C5orf49	0.0268014	1	0.0386663
C6orf62	0.00343978	1	0.00496256		C5orf51	-0.0275226	1	-0.0397067
C6orf89	0.0263148	1	0.0379643		C5orf52	0.000397649	1	0.000573686
C6orf99	-0.00226287	1	-0.00326463		C5orf56	0.00558754	1	0.00806111
C7	-0.00532959	1	-0.00768897		C5orf63	0.02978	1	0.0429634
C7orf25	-0.00121634	1	-0.0017548		C6	-0.0133206	1	-0.0192175
C7orf26	-0.0193146	1	-0.0278651		C6orf1	-0.0638102	1	-0.0920587
C7orf31	0.00751975	1	0.0108487		C6orf10	-0.00723766	1	-0.0104417
C7orf33	-0.000940548	1	-0.00135692		C6orf106	0.00812219	1	0.0117178
C7orf43	-0.0110463	1	-0.0159365		C6orf118	0.0195884	1	0.0282601
C7orf49	-0.0200571	1	-0.0289363		C6orf120	-0.00474002	1	-0.0068384
C7orf50	-0.0506402	1	-0.0730583		C6orf132	-0.0106311	1	-0.0153375
C7orf57	0.0104092	1	0.0150173		C6orf136	-0.00745862	1	-0.0107605
C7orf60	0.00682101	1	0.00984063		C6orf201	-0.00042336	1	-0.000610779
C7orf61	-0.0281442	1	-0.0406035		C6orf203	0.00796163	1	0.0114862
C7orf65	-0.00205384	1	-0.00296306		C6orf222	-0.00128309	1	-0.00185111
C7orf69	0.00062338	1	0.000899347		C6orf223	-0.0061959	1	-0.0089388
C7orf72	-3.29e-05	1	-4.74647e-05		C6orf226	-0.00263226	1	-0.00379754
C7orf73	-0.0341008	1	-0.049197		C6orf25	0.00172957	1	0.00249524
C8A	0.000159624	1	0.000230289		C6orf47	-0.0190857	1	-0.0275348
C8orf22	-0.00186641	1	-0.00269265		C6orf48	-0.0151937	1	-0.0219199
C8orf33	-0.0195183	1	-0.028159		C6orf52	-0.00889664	1	-0.0128351
C8orf34	0.00323195	1	0.00466272		C6orf58	-0.00623474	1	-0.00899482
C8orf37	0.0139308	1	0.0200979		C6orf62	-0.0174889	1	-0.0252312
C8orf4	-0.00262391	1	-0.00378551		C6orf89	0.00441094	1	0.00636364
C8orf44-SGK3	0.00489085	1	0.007056		C6orf99	0.0133155	1	0.0192102
C8orf46	0.0203157	1	0.0293093		C7	0.00373378	1	0.0053867
C8orf48	0.00160836	1	0.00232037		C7orf25	0.000259384	1	0.000374212
C8orf58	-0.0073991	1	-0.0106746		C7orf26	0.000803498	1	0.0011592
C8orf59	-0.00734626	1	-0.0105984		C7orf31	0.00213575	1	0.00308123
C8orf74	0.00133261	1	0.00192256		C7orf33	-0.00244284	1	-0.00352428
C8orf76	0.00288769	1	0.00416605		C7orf43	-0.0125412	1	-0.0180931
C8orf82	0.000754647	1	0.00108873		C7orf49	-0.0104066	1	-0.0150136
C8orf86	-0.00177015	1	-0.00255379		C7orf50	0.0205703	1	0.0296767
C8orf87	-0.00243534	1	-0.00351345		C7orf57	0.000555854	1	0.000801928
C9	0.000334095	1	0.000481997		C7orf60	0.0034646	1	0.00499836
C9orf114	-0.0282823	1	-0.0408027		C7orf61	0.0255091	1	0.0368019
C9orf116	-0.0046701	1	-0.00673753		C7orf65	-0.00124534	1	-0.00179664
C9orf129	-0.00870672	1	-0.0125611		C7orf69	-0.00236404	1	-0.00341058
C9orf131	-0.000979397	1	-0.00141297		C7orf72	0.00346224	1	0.00499496
C9orf135	-0.00190678	1	-0.0027509		C7orf73	0.0215077	1	0.0310291
C9orf139	-0.00126526	1	-0.00182539		C8A	-0.00265133	1	-0.00382506
C9orf142	-0.0265675	1	-0.0383288		C8orf22	-0.00059431	1	-0.000857408
C9orf147	0.0213602	1	0.0308163		C8orf33	-5e-05	1	-7.21348e-05
C9orf152	-0.00670695	1	-0.00967608		C8orf34	0.0818038	1	0.118018
C9orf153	0.0265239	1	0.0382659		C8orf37	-0.00341468	1	-0.00492634
C9orf16	-0.0305807	1	-0.0441187		C8orf4	0.00145128	1	0.00209376
C9orf163	-0.000536836	1	-0.000774491		C8orf44-SGK3	0.013655	1	0.0197
C9orf170	0.000679323	1	0.000980056		C8orf46	-0.0130294	1	-0.0187975
C9orf24	-0.0229942	1	-0.0331736		C8orf48	0.00126855	1	0.00183013
C9orf3	0.022087	0.0139569	0.0318649		C8orf58	0.001723	1	0.00248577
C9orf40	0.004269	1	0.00615886		C8orf59	0.00424215	1	0.00612012
C9orf43	0.00835225	1	0.0120498		C8orf74	0.000589754	1	0.000850835
C9orf50	-0.00173764	1	-0.00250688		C8orf76	0.00380393	1	0.00548791
C9orf57	-0.000499419	1	-0.000720509		C8orf86	-0.00423226	1	-0.00610586
C9orf64	-0.000622603	1	-0.000898226		C8orf87	-0.00110333	1	-0.00159177
C9orf66	0.000805649	1	0.00116231		C9	0.00206177	1	0.00297451
C9orf69	0.0233664	1	0.0337106		C9orf114	0.0574069	0.0162877	0.0828206
C9orf72	-0.0377759	1	-0.0544991		C9orf116	0.00248979	1	0.003592
C9orf78	0.00187991	1	0.00271213		C9orf129	-0.0062888	1	-0.00907283
C9orf84	-0.0160694	1	-0.0231833		C9orf131	-0.000685522	1	-0.000988999
C9orf85	0.0305541	1	0.0440802		C9orf135	-0.000865093	1	-0.00124807
C9orf9	0.00944715	1	0.0136294		C9orf139	-0.00080619	1	-0.00116309
C9orf91	0.00606898	1	0.00875569		C9orf142	0.00763339	1	0.0110127
C9orf92	-0.0102359	1	-0.0147673		C9orf147	-0.0120115	1	-0.0173289
CA1	-0.0104499	1	-0.0150761		C9orf152	-0.00275946	1	-0.00398106
CA10	-0.0213631	1	-0.0308204		C9orf153	0.00709755	1	0.0102396
CA11	0.0108423	1	0.0156422		C9orf16	0.0308775	1	0.0445469
CA12	-0.00420993	1	-0.00607365		C9orf163	0.0106025	1	0.0152962
CA13	-0.030576	1	-0.0441119		C9orf170	0.00861191	1	0.0124244
CA14	0.00901019	1	0.012999		C9orf24	-0.014714	1	-0.0212278
CA2	-0.0385786	1	-0.0556572		C9orf3	0.0551513	1	0.0795665
CA3	-0.0134954	1	-0.0194697		C9orf40	0.00289572	1	0.00417764
CA4	-0.00434075	1	-0.00626238		C9orf43	-0.000218144	1	-0.000314715
CA5A	-0.0144702	1	-0.0208761		C9orf50	0.00115819	1	0.00167092
CA5B	0.0593214	1	0.0855827		C9orf57	0.00505433	1	0.00729186
CA6	-0.001652	1	-0.00238334		C9orf64	-0.0081711	1	-0.0117884
CA7	0.00403313	1	0.00581857		C9orf69	-0.0339726	1	-0.0490121
CA8	0.0446729	1	0.0644494		C9orf72	0.0366784	1	0.0529157
CAAP1	-0.00970198	1	-0.013997		C9orf78	-0.0171903	1	-0.0248003
CAB39	-0.0320561	1	-0.0462472		C9orf84	-0.0136859	1	-0.0197446
CAB39L	0.0578803	1	0.0835036		C9orf85	-0.00771197	1	-0.011126
CABIN1	-0.0303068	1	-0.0437234		C9orf9	-0.00933056	1	-0.0134611
CABLES1	-0.465653	2.96e-23	-0.671796		C9orf91	-0.0146754	1	-0.0211721
CABLES2	0.00533878	1	0.00770223		C9orf92	-0.00376708	1	-0.00543474
CABP1	0.0258184	1	0.037248		CA1	0.00517855	1	0.00747107
CABP4	-0.000148371	1	-0.000214054		CA10	0.0122812	1	0.017718
CABP5	0.000244193	1	0.000352296		CA11	0.027931	1	0.0402959
CABP7	0.00101332	1	0.00146191		CA12	-0.00516343	1	-0.00744925
CABYR	-0.00301744	1	-0.00435325		CA13	0.0124547	1	0.0179683
CACFD1	-0.000158339	1	-0.000228435		CA14	-0.00108914	1	-0.0015713
CACHD1	-0.135688	1	-0.195756		CA2	-0.000673532	1	-0.000971701
CACNA1A	-0.0160543	1	-0.0231614		CA3	0.00384537	1	0.00554769
CACNA1B	0.0508675	1	0.0733863		CA4	0.00397732	1	0.00573806
CACNA1C	0.028748	1	0.0414746		CA5A	0.000160706	1	0.00023185
CACNA1C-AS1	-0.0033323	1	-0.0048075		CA5B	0.0760609	0.000107966	0.109733
CACNA1C-AS2	-0.00014971	1	-0.000215986		CA6	0.00397694	1	0.00573751
[truncated: 14,851 more rows]

## Sheet: INTERACTOME GENE
Gene symbol (EC)		Gene symbol (SFG)
APC		DCLK2
ARHGEF4		DNAJB1
ATXN1		FGFR3
BAALC		FOS
CRYAB		HPSE2
DCLK2		HSP90AA1
F3		HSPA1A
FGF2		HSPA1B
GJA1		HSPB1
HES1		ID2
HPSE2		JUN
HSP90AA1		JUNB
HSPA1A		TNC
HSPA1B
HSPB1
ID2
ID3
IFI16
JUN
MACF1
PRKCA
SDC4
SET
TNC
TTN
TUBB2B

## Sheet: INTERACTOME PPI
EC			SFG
Protein A	Protein B		Protein A	Protein B
APC	JUN		FGFR3	HSPA1A
FGF2	JUN		FOS	HSPA1A
GJA1	JUN		FGFR3	HSPA1B
HSPA1A	JUN		FOS	HSPA1B
HSPA1B	JUN		FGFR3	HSP90AA1
HSP90AA1	JUN		HSPA1A	HSP90AA1
TNC	JUN		HSPA1B	HSP90AA1
APC	MACF1		HSPB1	HSP90AA1
JUN	MACF1		FOS	JUN
ID2	MACF1		HSPA1A	JUN
APC	ARHGEF4		HSPA1B	JUN
FGF2	PRKCA		HSP90AA1	JUN
GJA1	PRKCA		DNAJB1	JUN
HSPA1A	PRKCA		TNC	JUN
HSP90AA1	PRKCA		FOS	JUNB
F3	PRKCA		JUN	JUNB
HES1	PRKCA		HSPA1A	DNAJB1
FGF2	IFI16		HSPA1B	DNAJB1
ID2	IFI16		HSPA1A	ID2
ID3	IFI16		HSPA1B	ID2
FGF2	SDC4		HSP90AA1	DCLK2
PRKCA	SDC4		JUN	HPSE2
HSPA1A	TTN
HSPA1B	TTN
CRYAB	TTN
PRKCA	TTN
HSPA1A	HSP90AA1
HSPA1B	HSP90AA1
HSPB1	HSP90AA1
HES1	HSP90AA1
HSPA1A	ID2
HSPA1B	ID2
HES1	ID2
HSPA1A	ATXN1
HSPA1B	ATXN1
HSP90AA1	DCLK2
HSP90AA1	TUBB2B
JUN	TUBB2B
JUN	SET
JUN	HPSE2
CRYAB	HSPB1
HES1	ID3
ATXN1	BAALC

## Sheet: PATHTWAY ENRICHMENT
The pathway enrichment analysis is based on genes from disease network (INTERACOME GENE)
EC
Pathway Term	# Overlapped genes	Adjusted P-value	Overlap Genes
MAPK signaling pathway	6	0.000230248	JUN;HSPB1;PRKCA;FGF2;HSPA1B;HSPA1A
Estrogen signaling pathway	4	0.00120931	HSP90AA1;JUN;HSPA1B;HSPA1A
Signaling pathways regulating pluripotency of stem cells	4	0.00120931	APC;ID2;ID3;FGF2
Breast cancer	4	0.00120931	JUN;APC;HES1;FGF2
Pathways in cancer	6	0.00124611	HSP90AA1;JUN;APC;HES1;PRKCA;FGF2
Protein processing in endoplasmic reticulum	4	0.00124611	HSP90AA1;CRYAB;HSPA1B;HSPA1A
Influenza A	4	0.00124611	JUN;PRKCA;HSPA1B;HSPA1A
Proteoglycans in cancer	4	0.00194809	HPSE2;SDC4;PRKCA;FGF2
Antigen processing and presentation	3	0.00194809	HSP90AA1;HSPA1B;HSPA1A
Gap junction	3	0.00260538	GJA1;TUBB2B;PRKCA
AGE-RAGE signaling pathway in diabetic complications	3	0.0033564	JUN;PRKCA;F3
Longevity regulating pathway	3	0.0033564	CRYAB;HSPA1B;HSPA1A
Measles	3	0.00710863	JUN;HSPA1B;HSPA1A
Fluid shear stress and atherosclerosis	3	0.00710863	HSP90AA1;JUN;SDC4
PI3K-Akt signaling pathway	4	0.00901074	HSP90AA1;TNC;PRKCA;FGF2
Wnt signaling pathway	3	0.00901074	JUN;APC;PRKCA
NOD-like receptor signaling pathway	3	0.011945	HSP90AA1;JUN;IFI16
Focal adhesion	3	0.015151	JUN;TNC;PRKCA
Legionellosis	2	0.015151	HSPA1B;HSPA1A
Pathogenic Escherichia coli infection	2	0.015151	TUBB2B;PRKCA
Regulation of actin cytoskeleton	3	0.0158193	APC;ARHGEF4;FGF2
VEGF signaling pathway	2	0.0158193	HSPB1;PRKCA
Amphetamine addiction	2	0.0200019	JUN;PRKCA
ECM-receptor interaction	2	0.027635	SDC4;TNC
ErbB signaling pathway	2	0.0279854	JUN;PRKCA
Colorectal cancer	2	0.0279854	JUN;APC
TGF-beta signaling pathway	2	0.0290513	ID2;ID3
GnRH signaling pathway	2	0.0290513	JUN;PRKCA
IL-17 signaling pathway	2	0.0290513	HSP90AA1;JUN
MicroRNAs in cancer	3	0.0290513	APC;TNC;PRKCA
Amoebiasis	2	0.0290513	HSPB1;PRKCA
Choline metabolism in cancer	2	0.0298681	JUN;PRKCA
Th17 cell differentiation	2	0.0336441	HSP90AA1;JUN
Human papillomavirus infection	3	0.0336631	APC;TNC;HES1
Toxoplasmosis	2	0.0352282	HSPA1B;HSPA1A
Relaxin signaling pathway	2	0.0447743	JUN;PRKCA
Spliceosome	2	0.0461503	HSPA1B;HSPA1A
SFG
Pathway Term	# Overlapped genes	Adjusted P-value	Overlap Genes
MAPK signaling pathway	6	6.98916e-07	JUN;HSPB1;FOS;FGFR3;HSPA1B;HSPA1A
Estrogen signaling pathway	5	6.98916e-07	HSP90AA1;JUN;FOS;HSPA1B;HSPA1A
Measles	4	3.99134e-05	JUN;FOS;HSPA1B;HSPA1A
Protein processing in endoplasmic reticulum	4	5.6268e-05	DNAJB1;HSP90AA1;HSPA1B;HSPA1A
Influenza A	4	5.6268e-05	DNAJB1;JUN;HSPA1B;HSPA1A
Antigen processing and presentation	3	0.00020604	HSP90AA1;HSPA1B;HSPA1A
IL-17 signaling pathway	3	0.000311419	HSP90AA1;JUN;FOS
Th17 cell differentiation	3	0.000400276	HSP90AA1;JUN;FOS
TNF signaling pathway	3	0.000400276	JUN;FOS;JUNB
Osteoclast differentiation	3	0.000552931	JUN;FOS;JUNB
Fluid shear stress and atherosclerosis	3	0.000657432	HSP90AA1;JUN;FOS
Pathways in cancer	4	0.00194509	HSP90AA1;JUN;FOS;FGFR3
Endocytosis	3	0.00291978	FGFR3;HSPA1B;HSPA1A
Legionellosis	2	0.00328638	HSPA1B;HSPA1A
Amphetamine addiction	2	0.00468288	JUN;FOS
B cell receptor signaling pathway	2	0.00478388	JUN;FOS
Leishmaniasis	2	0.004868	JUN;FOS
Pertussis	2	0.004868	JUN;FOS
PI3K-Akt signaling pathway	3	0.00533157	HSP90AA1;TNC;FGFR3
Colorectal cancer	2	0.00533157	JUN;FOS
Salmonella infection	2	0.00533157	JUN;FOS
Rheumatoid arthritis	2	0.00556293	JUN;FOS
Th1 and Th2 cell differentiation	2	0.00556293	JUN;FOS
Choline metabolism in cancer	2	0.00582111	JUN;FOS
T cell receptor signaling pathway	2	0.00582111	JUN;FOS
Longevity regulating pathway	2	0.00582111	HSPA1B;HSPA1A
Chagas disease (American trypanosomiasis)	2	0.00582111	JUN;FOS
Toll-like receptor signaling pathway	2	0.00582111	JUN;FOS
Toxoplasmosis	2	0.0066185	HSPA1B;HSPA1A
Relaxin signaling pathway	2	0.00842497	JUN;FOS
Spliceosome	2	0.00865197	HSPA1B;HSPA1A
Signaling pathways regulating pluripotency of stem cells	2	0.0090047	ID2;FGFR3
Apoptosis	2	0.00922995	JUN;FOS
Breast cancer	2	0.00945462	JUN;FOS
Oxytocin signaling pathway	2	0.00993037	JUN;FOS
Hepatitis B	2	0.0109222	JUN;FOS
NOD-like receptor signaling pathway	2	0.01261	HSP90AA1;JUN
Kaposi sarcoma-associated herpesvirus infection	2	0.0133706	JUN;FOS
Focal adhesion	2	0.014847	JUN;TNC
Human immunodeficiency virus 1 infection	2	0.015957	JUN;FOS
cAMP signaling pathway	2	0.015957	JUN;FOS
Human T-cell leukemia virus 1 infection	2	0.0165827	JUN;FOS
Glycosaminoglycan degradation	1	0.0231385	HPSE2
MicroRNAs in cancer	2	0.0286899	TNC;FGFR3
Prion diseases	1	0.0405345	HSPA1A
Bladder cancer	1	0.0463677	FGFR3

## Sheet: DISEASE GENE
Gene symbol (EC)		Gene symbol (SFG)
APC		FGFR3
ATXN1		FOS
CRYAB		HSP90AA1
FGF2		HSPA1A
GJA1		HSPA1B
HSP90AA1		HSPB1
HSPA1A		JUN
HSPA1B		JUNB
HSPB1
JUN
SET

## Sheet: GPSnet parameters
EC
	top 0.00010	top 0.00020	top 0.00030	top 0.00040	top 0.00050
0	56	69	86	87	87
0.1	42	32	34	35	31
0.2	26	23	26	25	24
0.3	20	21	19	20	19
0.4	19	20	18	17	17
0.5	18	17	16	17	17
0.6	18	17	16	16	16
0.7	16	16	16	16	16
0.8	16	16	16	16	16
0.9	16	15	16	15	16
SFG
	top 0.00010	top 0.00020	top 0.00030	top 0.00040	top 0.00050
0	45	57	70	80	95
0.1	42	34	39	35	37
0.2	40	33	34	34	32
0.3	29	33	31	30	30
0.4	29	29	29	29	30
0.5	29	29	29	19	19
0.6	19	29	19	18	17
0.7	18	19	18	17	17
0.8	13	14	17	17	17
0.9	13	14	13	13	17
