# Supplementary material for: Multimodal single-cell/nucleus RNA sequencing data analysis uncovers molecular networks between disease-associated microglia and astrocytes with implications for drug repurposing in Alzheimer's disease
Source: HighWire-hosted journal article supplement (doi:10.1101/gr.272484.120), 2021-02-24
Supplement: Supplemental_Table_S13.zip [file Supplemental_Table_S13.xlsx]

## Sheet: Notes
Supplemental Table S13. Network proximity evaluation between different molecular networks (disease-associated microglia and astrocytes) or gene sets.

## Sheet: distances between 6 networks
Network Proximity Evaluation (SHORTEST)
Network Proximity between scDAMnet and mDAAnet
dist	2.15
z_score	-1.9
p_val	0.029
Network Proximity between scDAMnet and snDAMnet
dist	2.11
z_score	-3.32
p_val	0
Network Proximity between snDAMnet and mDAAnet
dist	2.07
z_score	-4.07
p_val	0
Network Proximity between mDAAnet and hDAAECnet
dist	2.11
z_score	-1.93
p_val	0.031
Network Proximity between mDAAnet and hDAASFGnet
dist	2.08
z_score	-1.4
p_val	0.081
Network Proximity between mDAAnet and hDAAnet
dist	1.864
z_score	-3.78
p_val	0
Network Proximity between scDAMnet and hDAAECnet
dist	2.14
z_score	-1.55
p_val	0.066
Network Proximity between scDAMnet and hDAASFGnet
dist	2.11
z_score	-1.24
p_val	0.114
Network Proximity between scDAMnet and hDAAnet
dist	2.1
z_score	-1.96
p_val	0.023
Network Proximity between snDAMnet and hDAAECnet
dist	2.07
z_score	-1.83
p_val	0.035
Network Proximity between snDAMnet and hDAASFGnet
dist	2.04
z_score	-1.53
p_val	0.059
Network Proximity between snDAMnet and hDAAnet
dist	2.08
z_score	-1.64
p_val	0.055
Network Proximity between hDAAECnet and hDAASFGnet
dist	1.99
z_score	-3.62
p_val	0
Network Proximity between hDAAECnet and hDAAnet
dist	2.01
z_score	-2.79
p_val	0.003
Network Proximity between hDAASFGnet and hDAAnet
dist	1.864
z_score	-3.78
p_val	0

## Sheet: metabolic_genes and disease net
Network Proximity Evlauation between Disease Networks and Metabolic Genes
Network proximity between scDAMnet and metabolic genes
Method	Distance	Z Score	P Value
SHORTEST	2.41	-8.11	0
Network proximity between snDAMnet and metabolic genes
Method	Distance	Z Score	P Value
SHORTEST	2.36	-6.6	0
Network proximity between mDAAnet and metabolic genes
Method	Distance	Z Score	P Value
SHORTEST	2.39	-7.09	0
Network proximity between hECDAAnet and metabolic genes
Method	Distance	Z Score	P Value
SHORTEST	2.39	-5.6	0
Network proximity between hSFGDAAnet and metabolic genes
Method	Distance	Z Score	P Value
SHORTEST	2.4	-4.59	0
Network proximity between hDAAnet and metabolic genes
Method	Distance	Z Score	P Value
SHORTEST	2.35	-7.15	0
