# Supplementary material for: Multimodal single-cell/nucleus RNA sequencing data analysis uncovers molecular networks between disease-associated microglia and astrocytes with implications for drug repurposing in Alzheimer's disease
Source: HighWire-hosted journal article supplement (doi:10.1101/gr.272484.120), 2021-02-24
Supplement: Supplemental_Table_S14.zip [file Supplemental_Table_S14.xlsx]

## Sheet: Notes
Supplemental Table S14. Network Analysis of metabolites-enzyme associations triggering molecular networks between microglia and astrocyte.

## Sheet: Metabolite-enzyme subtwork
The metabolite-enzyme subnetwork between DAM and DAA in the human protein-protein interactome network model (Figure S8A)
Vertex (gene symbol/metabolite name)	Rescaled size		For genes: rescale fold change to (0.5, 2)
CST7	2		For metabolites: rescale betweenness centrality to (0.5, 2)
APOE	1.83522
CCL3	1.63533
CLEC7A	1.55734
SPP1	1.53476
AXL	1.41725
CSF1	1.40062
CCL4	1.3897
IGF1	1.31976
GNAS	1.26814
CD63	1.22357
HIF1A	1.20159
CTSB	1.19133
CTSD	1.18966
CD9	1.14327
FTH1	1.13704
LGALS3BP	1.12339
ACACA	1.12147
DAB2	1.10728
SLC2A5	1.06711
CCR5	1.06063
ZBTB7A	1.05409
PABPC1	1.0407
PSAT1	1.04048
BCL2	1.03868
CD300LF	1.03055
PLAUR	1.02738
PLD3	1.02732
CTSA	1.02638
PLD1	1.02092
IVNS1ABP	1.01991
FLT1	1.01604
CYBB	1.01113
RPLP1	1.01057
RPSA	1.01043
TIMP2	1.00945
CD33	1.00717
ARRDC4	1.00552
ARHGAP5	1.00162
CALM2	0.996895
RPLP2	0.995168
MARCKS	0.993692
ALDOA	0.98792
EEF1B2	0.986761
COX8A	0.986421
SLC25A3	0.981631
NCF1	0.980929
CSTB	0.977928
TEC	0.977911
INPP5D	0.977041
ATF3	0.975871
SNTA1	0.96901
WWP1	0.968735
ATP6V1C1	0.968692
PRDX4	0.966653
RPS6KA1	0.962432
PTEN	0.961787
TPI1	0.960111
FGR	0.960001
CYBA	0.958685
RGS2	0.956352
RPLP0	0.954546
LYN	0.952469
NPM1	0.951826
MERTK	0.950663
SOCS6	0.949971
FCGR2B	0.94726
ADRB2	0.944547
CLIC4	0.944464
CD244	0.943997
ITGA6	0.94384
PTPRC	0.942576
LDHA	0.94184
SSR4	0.940056
LDHB	0.936887
IQGAP1	0.936315
HSP90AA1	0.934976
GLB1	0.934231
EEF1A1	0.933042
CKB	0.932525
CYTH1	0.932438
PPT1	0.929036
BIN1	0.927324
CSF1R	0.92705
DPP7	0.92614
PGK1	0.92614
TGFBR2	0.924782
HCK	0.923312
TPT1	0.922605
EEF2	0.922517
HSP90AB1	0.918163
PLCG2	0.917732
WDR44	0.917064
CD2AP	0.915005
MAPK14	0.914782
SRSF5	0.912767
EEF2K	0.911506
COMT	0.910297
SYK	0.909779
SH3BP2	0.907207
PTPN6	0.905717
PAK1	0.90504
PKM	0.904946
LAT2	0.899292
PRKCD	0.895826
ETS1	0.894247
PHLPP2	0.893854
FCER1G	0.893379
DUSP3	0.89098
SH3BP1	0.890631
MITF	0.882902
IL6ST	0.882205
GRB2	0.881505
EEF1G	0.878785
PPP3CA	0.878071
EGLN3	0.877015
AKT3	0.87433
CTNNB1	0.874204
RGS11	0.872458
PTPRA	0.8722
GNG5	0.871349
ADAM10	0.869118
RPS15A	0.868537
RPTOR	0.868204
RAF1	0.867625
HNRNPR	0.867413
HSPA4	0.866948
HNRNPA2B1	0.862071
VIM	2
MYOC	1.91135
GSN	1.8248
GFAP	1.80494
CLU	1.70266
LGALS1	1.69249
FOS	1.64625
CHL1	1.63062
GRIN2B	1.6057
NRG3	1.60117
GRIA1	1.59257
CST3	1.58355
HSPA5	1.57799
DLG2	1.56422
PRDX6	1.55974
CEBPB	1.55437
DCC	1.53034
CD81	1.52793
LRRC7	1.51259
TUBB2B	1.50258
GRIN3A	1.50243
DST	1.49732
ANK3	1.49121
TSPAN3	1.48929
STAT3	1.48745
GRIN2A	1.48611
TNFRSF1A	1.48453
EZR	1.48428
ANXA2	1.47456
SSFA2	1.4707
GSTP1	1.46622
VCAM1	1.46618
CD44	1.45449
TUBA4A	1.44247
SLC1A5	1.43799
ERBB2IP	1.43606
ERBB4	1.43255
PDZD2	1.43093
SLC3A2	1.43043
DDR1	1.4302
PRDX1	1.42887
DMD	1.42576
S100B	1.42322
CAMK2B	1.41953
AHNAK	1.41807
BCL3	1.41506
FGFR1	1.41139
S100A10	1.40486
DDOST	1.39789
ADORA2B	1.39162
FLNA	1.39096
MYO10	1.39064
DDX5	1.38758
PTPN12	1.3874
GRIN1	1.38323
MSN	1.38155
GRM7	1.38152
CYBRD1	1.38134
PRKCE	1.38042
PIK3R1	1.37623
GRM5	1.3733
ANK2	1.37309
ICAM1	1.37286
TCP1	1.36994
CAMK2D	1.36925
NFKB1	1.36853
ENAH	1.36709
TJP1	1.36696
MAPK1	1.36604
CTNNA1	1.36593
TUBA1A	1.3658
FGFR2	1.36549
DLGAP2	1.36464
IFIT3	1.36441
TNIK	1.36179
NEK6	1.36083
ANTXR1	1.36061
PHKB	1.35881
SKI	1.3575
CLIC1	1.35728
HDAC4	1.35625
TUBB2A	1.3562
SNCA	1.35309
PTBP1	1.34865
GAB2	1.34848
EPHA7	1.34844
FAS	1.34718
RPS6KB2	1.34712
NRG2	1.34627
ANKS1B	1.34571
RPL23A	1.34379
CAMK2A	1.34329
CDH2	1.3428
LRP1	1.33917
XRCC5	1.33849
PTPN11	1.33817
A2M	1.33781
MAP2	1.33777
GABARAPL2	1.33606
GRID2	1.33512
SRA1	1.33463
EPHA4	1.33457
ISG15	1.33435
FAM171B	1.33344
ILF2	1.33262
CAMK2N1	1.33011
MYO6	1.32992
PRKCB	1.32794
Adenosine monophosphate	0.820318
Glycine	0.620168
L-Glutamic acid	1.76907
L-Tyrosine	0.620168
L-Phenylalanine	1.02099
L-Alanine	0.729507
L-Proline	0.550383
L-Threonine	0.729507
L-Asparagine	0.729507
L-Isoleucine	0.620168
L-Histidine	0.620168
L-Lysine	0.620168
L-Serine	2
L-Aspartic acid	0.550383
L-Arginine	0.620168
L-Cysteine	0.729507
L-Glutamine	0.729507
L-Leucine	0.620168
L-Valine	0.620168
L-Tryptophan	0.550383
D-Glucose	0.647967
Palmitic acid	0.528003
Elaidic acid	0.795154
Arachidonic acid	0.528003
Glutathione	0.528605
Uric acid	0.5
Pyruvic acid	0.516391
L-Lactic acid	0.5
Dopamine	0.612294
Choline	0.537165

## Sheet: Enzyme-AD metabolites
77 enzymes involved in the AD-related metabolites (Figure S8A,B)
Enzymes in DAM and DAA	Enzymes in DAM	Enzymes in DAA
ACACA	ACACA	APOE
ALDOA	AKT3	CAMK2A
APOE	ALDOA	CAMK2B
ATP6V1C1	APOE	CAMK2D
AXL	ATP6V1C1	CTSB
DDR1	AXL	CTSD
CAMK2A	CKB	CYBRD1
CAMK2B	COMT	DDOST
CAMK2D	COX8A	DDR1
CKB	CSF1R	EPHA4
COMT	CTSA	EPHA7
COX8A	CTSB	ERBB4
MAPK14	CTSD	FGFR1
CSF1R	DUSP3	FGFR2
CTSB	FGR	GSTP1
CTSD	FLT1	LRP1
DDOST	FTH1	MAPK1
DUSP3	GLB1	NEK6
EPHA4	HCK	PHKB
EPHA7	INPP5D	PIK3R1
ERBB4	LDHA	PRDX1
FGFR1	LDHB	PRDX6
FGFR2	LYN	PRKCB
FGR	MAPK14	PRKCE
FLT1	MERTK	PTPN11
FTH1	PAK1	PTPN12
GLB1	PGK1	RPS6KB2
GSTP1	PHLPP2	SLC1A5
HCK	PKM	SLC3A2
INPP5D	PLCG2	TNIK
LDHA	PLD1
LDHB	PLD3
LRP1	PPP3CA
LYN	PPT1
PRDX1	PRKCD
PAK1	PSAT1
PGK1	PTEN
SLC25A3	PTPN6
PHKB	PTPRA
PIK3R1	PTPRC
PKM	RAF1
PLCG2	RPS6KA1
PLD1	SLC25A3
CTSA	SLC2A5
PPP3CA	SSR4
PPT1	SYK
PRKCB	TEC
PRKCD	TGFBR2
PRKCE	TPI1
MAPK1	WWP1
PTEN
PTPN6
PTPN11
PTPN12
PTPRA
PTPRC
RAF1
RPS6KA1
RPS6KB2
SLC1A5
SLC2A5
SLC3A2
SSR4
SYK
TEC
TGFBR2
TPI1
PRDX6
AKT3
MERTK
NEK6
WWP1
PHLPP2
TNIK
PLD3
PSAT1
CYBRD1

## Sheet: 155 AD-related metabolites
155 AD-related metabolites collected from literature and HMDB (Duplicates have been eliminated)
Detailed information is shown in the website: https://alzgps.lerner.ccf.org/
Source		Metabolites	HMDB ID
Literature 1		Choline	HMDB0000097
PMID	31978055	S-Adenosylhomocysteine	HMDB0000939
Year	2020	S-Adenosylmethionine	HMDB0001185
Sample	Brain	L-Cysteine	HMDB0000574
n	9	Glutathione	HMDB0000125
		Spermidine	HMDB0001257
		N-Acetylglutamic acid	HMDB0001138
		N-Acetyl-L-aspartic acid	HMDB0000812
		Gamma-Aminobutyric acid	HMDB0000112
Literature 2		L-Phenylalanine	HMDB0000159
PMID	31488882	L-Isoleucine	HMDB0000172
Year	2019
Sample	Blood
n	2
Literature 3		Lithocholic acid glycine conjugate	HMDB0000698
PMID	30337151	Deoxycholic acid glycine conjugate	HMDB0000631
Year	2018	Cholic acid	HMDB0000619
Sample	Blood	Deoxycholic acid	HMDB0000626
n	8	Taurodeoxycholic acid	HMDB0000896
		Lithocholyltaurine	HMDB0000722
		Chenodeoxycholic acid glycine conjugate	HMDB0000637
		3,4,5-Trimethoxycinnamic acid	HMDB0002511
Literature 4		L-Arginine	HMDB0000517
PMID	29370177	Propionylcarnitine	HMDB0000824
Year	2018	LysoPC(17:0)	HMDB0012108
Sample	Brain	LysoPC(18:0)	HMDB0010384
n	17	PC(18:2(9Z,12Z)/20:2(11Z,14Z))	HMDB0008145
		PC(22:0/18:4(6Z,9Z,12Z,15Z))	HMDB0008536
		PC(18:1(9Z)/22:5(4Z,7Z,10Z,13Z,16Z))	HMDB0008121
		PC(o-16:0/18:0)	HMDB0013405
		PC(O-16:0/18:2(9Z,12Z))	HMDB0011151
		PC(o-16:0/20:0)	HMDB0013406
		PC(o-18:1(11Z)/18:2(9Z,12Z))	HMDB0013425
		PC(o-16:0/20:4(8Z,11Z,14Z,17Z))	HMDB0013407
		PC(o-18:1(9Z)/22:0)	HMDB0013433
		PC(o-24:0/18:3(6Z,9Z,12Z))	HMDB0013458
		Serotonin	HMDB0000259
		SM C16:1	HMDB0029216
		Spermidine	HMDB0001257
Literature 5		N-Acetyl-L-aspartic acid	HMDB0000812
PMID	28323825	L-Acetylcarnitine	HMDB0000201
Year	2017	Adenine	HMDB0000034
Sample	Brain	S-Adenosylmethionine	HMDB0001185
n	58	L-Alanine	HMDB0000161
		Allantoin	HMDB0000462
		4-Aminobutyraldehyde	HMDB0001080
		Adenosine monophosphate	HMDB0000045
		Arachidonic acid	HMDB0001043
		L-Arginine	HMDB0000517
		Ascorbic acid	HMDB0000044
		L-Asparagine	HMDB0000168
		L-Aspartic acid	HMDB0000191
		Butyrylcarnitine	HMDB0002013
		Carbamic acid	HMDB0003551
		5a-Cholest-8-en-3b-ol	HMDB0006841
		Cholesterol	HMDB0000067
		Coumaric acid	HMDB0041592
		Creatine	HMDB0000064
		L-Cysteine	HMDB0000574
		Cytidine	HMDB0000089
		Dehydroascorbic acid	HMDB0001264
		7-Azaindolizine	HMDB0033576
		Dimethylglycine	HMDB0000092
		Docosahexaenoic acid	HMDB0002183
		Dopamine	HMDB0000073
		Eicosapentaenoic acid	HMDB0001999
		Fumaric acid	HMDB0000134
		Gamma-Aminobutyric acid	HMDB0000112
		Gluconic acid	HMDB0000625
		4-Guanidinobutanoic acid	HMDB0003464
		Guanine	HMDB0000132
		Guanosine	HMDB0000133
		Adipic acid	HMDB0000448
		L-Histidine	HMDB0000177
		Hypoxanthine	HMDB0000157
		Indoleacetic acid	HMDB0000197
		L-Dopa	HMDB0000181
		L-Leucine	HMDB0000687
		Linoleic acid	HMDB0000673
		Alpha-Linolenic acid	HMDB0001388
		L-Lysine	HMDB0000182
		N-Methyl-D-aspartic acid	HMDB0002393
		Methyl stearate	HMDB0034154
		Nicotinic acid	HMDB0001488
		3-Nitrotyrosine	HMDB0001904
		Norepinephrine	HMDB0000216
		Oleic acid	HMDB0000207
		Ornithine	HMDB0000214
		2-Oxoarginine	HMDB0004225
		Palmitic acid	HMDB0000220
		Pantothenic acid	HMDB0000210
		Phosphorylcholine	HMDB0001565
		Propionylcarnitine	HMDB0000824
		L-Tyrosine	HMDB0000158
		Uracil	HMDB0000300
		Uric acid	HMDB0000289
		L-Valine	HMDB0000883
Literature 6		L-Aspartic acid	HMDB0000191
PMID	26717242	Xanthine	HMDB0000292
Year	2016	Pyruvic acid	HMDB0000243
Sample	Brain	L-Glutamine	HMDB0000641
n	16	N-Acetyl-L-aspartic acid	HMDB0000812
		N-Acetylglutamic acid	HMDB0001138
		Xanthosine	HMDB0000299
		4-Hydroxyproline	HMDB0000725
		L-Threonine	HMDB0000167
		L-Serine	HMDB0000187
		Inosine	HMDB0000195
		S-Adenosylmethionine	HMDB0001185
		L-Glutamic acid	HMDB0000148
		S-Adenosylhomocysteine	HMDB0000939
		Inosinic acid	HMDB0000175
		Choline	HMDB0000097
		Citric acid	HMDB0000094
		L-Malic acid	HMDB0000156
Literature 7		Pentadecanoic acid	HMDB0000826
PMID	27069549	Palmitic acid	HMDB0000220
Year	2016	Palmitoleic acid	HMDB0003229
Sample	Brain	Heptadecanoic acid	HMDB0002259
n	9	Stearic acid	HMDB0000827
		Elaidic acid	HMDB0000573
		Dihomo-alpha-linolenic acid	HMDB0060039
		Docosadienoate (22:2n6)	HMDB0061714
		Docosahexaenoic acid	HMDB0002183
Literature 8		L-Valine	HMDB0000883
PMID	25575172	Urea	HMDB0000294
Year	2015	L-Aspartic acid	HMDB0000191
Sample	Blood	Pyroglutamic acid	HMDB0000267
n	23	L-Glutamine	HMDB0000641
		L-Phenylalanine	HMDB0000159
		L-Asparagine	HMDB0000168
		Ornithine	HMDB0000214
		Pipecolic acid	HMDB0000070
		L-Histidine	HMDB0000177
		L-Tyrosine	HMDB0000158
		Palmitic acid	HMDB0000220
		Uric acid	HMDB0000289
		L-Tryptophan	HMDB0000929
		Stearic acid	HMDB0000827
		L-Cystine	HMDB0000192
		L-Lactic acid	HMDB0000190
		Oxoglutaric acid	HMDB0000208
		Isocitric acid	HMDB0000193
		D-Glucose	HMDB0000122
		Oleic acid	HMDB0000207
		Adenosine	HMDB0000050
		Cholesterol	HMDB0000067
Literature 9		PC(16:0/20:5(5Z,8Z,11Z,14Z,17Z))	HMDB0007984
PMID	24041970	PC(16:0/22:6(4Z,7Z,10Z,13Z,16Z,19Z))	HMDB0007991
Year	2014	PC(18:0/22:6(4Z,7Z,10Z,13Z,16Z,19Z))	HMDB0008057
Sample	Blood
n	3
Literature 10		3-Hydroxy-9-hexadecenoylcarnitine	HMDB0013333
PMID	24608097	Propionylcarnitine	HMDB0000824
Year	2014	LysoPC(18:2(9Z,12Z))	HMDB0010386
Sample	Blood	PC(22:5(4Z,7Z,10Z,13Z,16Z)/14:1(9Z))	HMDB0008657
n	10	PC(16:0/22:0)	HMDB0007985
		PC(18:2(9Z,12Z)/20:4(5Z,8Z,11Z,14Z))	HMDB0008147
		PC(24:1(15Z)/16:0)	HMDB0008791
		PC(20:1(11Z)/20:1(11Z))	HMDB0008308
		PC(18:1(9Z)/22:5(4Z,7Z,10Z,13Z,16Z))	HMDB0008121
		PC(o-18:0/22:6(4Z,7Z,10Z,13Z,16Z,19Z))	HMDB0013422
Literature 11		Spermidine	HMDB0001257
PMID	23917584	Spermine	HMDB0001256
Year	2013	gamma-glutamylvaline	HMDB0011172
Sample	Brain	N1-Acetylspermidine	HMDB0001276
n	6	N1-Acetylspermine	HMDB0001186
		Putrescine	HMDB0001414
Literature 12		Choline	HMDB0000097
PMID	22967182	Asymmetric dimethylarginine	HMDB0001539
Year	2012	L-Arginine	HMDB0000517
Sample	CSF	L-Valine	HMDB0000883
n	10	L-Proline	HMDB0000162
		L-Serine	HMDB0000187
		L-Histidine	HMDB0000177
		Creatine	HMDB0000064
		L-Carnitine	HMDB0000062
		Suberylglycine	HMDB0000953
HMDB		Carnosine	HMDB0000033
		beta-Alanine	HMDB0000056
		Glycerophosphocholine	HMDB0000086
		Folic acid	HMDB0000121
		Glycine	HMDB0000123
		Methylmalonic acid	HMDB0000202
		Succinic acid	HMDB0000254
		Creatinine	HMDB0000562
		Homocysteine	HMDB0000742
		Acetylcholine	HMDB0000895
		1-Methylhistamine	HMDB0000898
		Thiamine pyrophosphate	HMDB0001372
		24-Hydroxycholesterol	HMDB0001419
		Substance P	HMDB0001897
		8-Hydroxyguanine	HMDB0002032
		8-Hydroxyguanosine	HMDB0002044
		27-Hydroxycholesterol	HMDB0002103
		4-Hydroxynonenal	HMDB0004362
		Dynorphin A	HMDB0012935

## Sheet: Clinical Studies
Clinical studies uncover the AD-related metabolites in human brian, blood or CSF
Detail information is in the website: https://alzgps.lerner.ccf.org/
No	PMID	Journal	Year	Metabolite	Sample
1	31978055	Plos Medicine	2020	9	Brain
2	31488882	Cell Research	2019	2	Blood
3	30337151	Alzheimer's & Dementia	2018	8	Serum
4	29370177	Plos Medicine	2018	26	Brain
5	28323825	Plos Medicine	2017	58	Brain
6	26717242	Journal of Proteome Research	2016	16	Brain
7	27069549	American Journal of Translational Research	2016	9	Brain
8	25575172	Journal of Pharmaceutical and Biomedical Analysis	2015	23	Serum
9	24041970	Neurobiology of Aging	2014	3	Plasma
10	24608097	Nature Medicine	2014	10	Plasma
11	23917584	Scientific Report	2013	8	Brain
12	22967182	Analytical Chemistry	2012	10	CSF
