# Supplementary material for: Multimodal single-cell/nucleus RNA sequencing data analysis uncovers molecular networks between disease-associated microglia and astrocytes with implications for drug repurposing in Alzheimer's disease
Source: HighWire-hosted journal article supplement (doi:10.1101/gr.272484.120), 2021-02-24
Supplement: Supplemental_Table_S15.zip [file Supplemental_Table_S15.xlsx]

## Sheet: Notes
Supplemental Table S15. Gene set enrichment analysis (GSEA) results of network-based discovery of repurposable drug candidates for potential AD treatments.

## Sheet: snDAMnet_GSE140511
Instance ID in the Cmap database	DrugBank ID	Drug Name	Drug Dose in Cmap database	Cell lines in Cmap database	Eneichment Score (ES)	P-value	adjusted p-value (FDR)
1995	DB13726	sulfaguanidine	1.86e-05	HL60	0.736436	0	0
1718	DB00498	phenindione	1.8e-05	HL60	0.721835	0	0
1318	DB01578	metrizamide	5e-06	HL60	0.707921	0.01	0.122984
1973	DB00366	doxylamine	1.02e-05	HL60	0.685838	0.01	0.122984
3355		Prestwick-857	1.22e-05	MCF7	0.677387	0	0
1314	DB00395	carisoprodol	1.54e-05	HL60	0.671727	0	0
1946	DB00927	famotidine	1.18e-05	PC3	0.66609	0	0
1309		lactobionic acid	1.12e-05	HL60	0.653262	0.01	0.122984
7419		telenzepine	9e-06	MCF7	0.646125	0.03	0.165162
7376	DB01001	salbutamol	1.68e-05	PC3	0.644879	0	0
2030	DB00415	ampicillin	1e-05	HL60	0.634155	0.01	0.122984
2011		cotinine	2.26e-05	HL60	0.631806	0.02	0.148418
1901	DB08960	hexamethonium bromide	1e-05	PC3	0.630824	0.01	0.122984
7301	DB01251	gliquidone	7.6e-06	PC3	0.625806	0	0
1377		acetylsalicylsalicylic acid	1.34e-05	HL60	0.625175	0	0
6997	DB00947	fulvestrant	1e-08	MCF7	0.624438	0.02	0.148418
1300		3-hydroxy-DL-kynurenine	1.78e-05	HL60	0.616107	0.04	0.173665
4601		3-acetamidocoumarin	1.96e-05	PC3	0.599678	0	0
6786	DB00748	carbinoxamine	9.8e-06	MCF7	0.595282	0	0
1990	DB00861	diflunisal	1.6e-05	HL60	0.594127	0	0
1335	DB00835	brompheniramine	9.2e-06	HL60	0.591215	0.02	0.148418
6361	DB13783	acemetacin	9.6e-06	PC3	0.5912	0.01	0.122984
1371	DB01114	chlorphenamine	1.02e-05	HL60	0.591082	0.02	0.148418
1336		SR-95639A	1e-05	HL60	0.59043	0.09	0.203033
2004		khellin	1.54e-05	HL60	0.587848	0.01	0.122984
1870	DB00414	acetohexamide	1.24e-05	HL60	0.586282	0.04	0.173665
7401	DB00650	calcium folinate	7.8e-06	PC3	0.585758	0.04	0.173665
1799		todralazine	1.48e-05	PC3	0.585513	0.01	0.122984
1815	DB00605	sulindac	1.12e-05	PC3	0.577388	0.03	0.165162
1329		N-acetyl-L-aspartic acid	2.28e-05	HL60	0.576689	0.01	0.122984
2016	DB00408	loxapine	9e-06	HL60	0.574457	0.01	0.122984
2120	DB09216	tolfenamic acid	1.52e-05	PC3	0.572815	0.01	0.122984
2975	DB01019	bethanechol	2.04e-05	HL60	0.57115	0.01	0.122984
1645	DB02546	vorinostat	1e-05	MCF7	0.570829	0.03	0.165162
1265	DB01060	amoxicillin	1.1e-05	HL60	0.568785	0	0
1399	DB00951	isoniazid	2.92e-05	HL60	0.565253	0	0
2035		trichostatin A	1e-07	HL60	0.562839	0	0
7334	DB04626	apramycin	7.4e-06	MCF7	0.562232	0.02	0.148418
7367	DB00779	nalidixic acid	1.46e-05	PC3	0.561914	0	0
2168	DB00180	flunisolide	9.2e-06	HL60	0.561899	0.01	0.122984
1987	DB00999	hydrochlorothiazide	1.34e-05	HL60	0.561191	0.01	0.122984
1159	DB05134	tanespimycin	1e-06	HL60	0.560716	0.02	0.148418
1341	DB13092	meclocycline	5.8e-06	HL60	0.560486	0.03	0.165162
7494		15(S)-15-methylprostaglandin E2	1e-05	PC3	0.56024	0	0
7026	DB00584	enalapril	8.2e-06	MCF7	0.559461	0.01	0.122984
7299	DB06704	iobenguane	1.08e-05	PC3	0.558087	0.02	0.148418
2015		metanephrine	1.72e-05	HL60	0.556682	0.02	0.148418
4557		CP-320650-01	1e-05	PC3	0.553771	0.04	0.173665
7491		CP-319743	1e-05	PC3	0.55361	0.03	0.165162
7057		0316684-0000	1e-05	PC3	0.549075	0.04	0.173665
1789		quipazine	9e-06	HL60	0.548763	0.01	0.122984
1967	DB00391	sulpiride	1.18e-05	HL60	0.547581	0.03	0.165162
1312	DB00451	levothyroxine sodium	5.2e-06	HL60	0.547265	0.02	0.148418
2012	DB04832	zimeldine	9.8e-06	HL60	0.545982	0	0
3005	DB00870	suprofen	1.54e-05	HL60	0.54395	0.02	0.148418
2340	DB01165	ofloxacin	1.1e-05	HL60	0.543758	0.02	0.148418
7058		SB-202190	1e-06	PC3	0.543264	0.05	0.180902
1174	DB00412	rosiglitazone	1e-05	HL60	0.543213	0.03	0.165162
7172	DB01190	clindamycin	8.6e-06	MCF7	0.542319	0.03	0.165162
2761	DB00572	atropine	5.8e-06	MCF7	0.541775	0	0
1965	DB13179	troleandomycin	5e-06	HL60	0.540804	0.02	0.148418
2098		antimycin A	7.2e-06	PC3	0.54074	0.02	0.148418
3474	DB00703	methazolamide	1.7e-05	MCF7	0.539454	0.01	0.122984
3794	DB00991	oxaprozin	1.36e-05	PC3	0.539054	0	0
1891		trichostatin A	1e-07	PC3	0.536861	0.06	0.187021
1284		trichostatin A	1e-07	HL60	0.535331	0.03	0.165162
1209	DB00313	valproic acid	0.001	PC3	0.533829	0.06	0.187021
2346	DB08981	fenbufen	1.58e-05	HL60	0.533412	0.02	0.148418
2014	DB00524	metolazone	1.1e-05	HL60	0.532979	0	0
7030		laudanosine	1.12e-05	MCF7	0.532864	0.03	0.165162
7047		trichostatin A	1e-06	PC3	0.532601	0.01	0.122984
7501	DB04786	suramin sodium	1e-05	PC3	0.531808	0.03	0.165162
3477	DB01331	cefoxitin	8.8e-06	MCF7	0.531127	0.02	0.148418
2162		gelsemine	1.24e-05	HL60	0.530329	0.02	0.148418
441	DB04557	arachidonic acid	1e-05	MCF7	0.530183	0.03	0.165162
2040	DB00850	perphenazine	1e-05	HL60	0.528186	0.02	0.148418
1844	DB09357	dexpanthenol	1.94e-05	HL60	0.527506	0.01	0.122984
2382	DB13346	bufexamac	1.8e-05	HL60	0.527494	0.03	0.165162
7005		trichostatin A	1e-07	MCF7	0.52707	0.01	0.122984
1966	DB06711	naphazoline	1.62e-05	HL60	0.527039	0.01	0.122984
1267	DB13588	naftidrofuryl	8.4e-06	HL60	0.525689	0	0
1793		trichostatin A	1e-07	PC3	0.525081	0	0
482	DB00482	celecoxib	1e-05	PC3	0.525039	0.02	0.148418
1994	DB13720	diphemanil metilsulfate	1.02e-05	HL60	0.524965	0.01	0.122984
2139	DB11562	bicuculline	1.08e-05	HL60	0.524434	0.02	0.148418
1611		zaprinast	1.48e-05	HL60	0.524198	0	0
3860	DB00692	phentolamine	1.26e-05	MCF7	0.522502	0.04	0.173665
1233	DB00412	rosiglitazone	1e-05	PC3	0.521981	0.06	0.187021
1327	DB12582	piperine	1.4e-05	HL60	0.521868	0.01	0.122984
7093		0316684-0000	1e-05	MCF7	0.520791	0.03	0.165162
6340		trichostatin A	1e-07	PC3	0.520452	0.05	0.180902
4814	DB00805	minaprine	1.08e-05	MCF7	0.520335	0.02	0.148418
1863	DB00784	mefenamic acid	1.66e-05	HL60	0.520171	0.02	0.148418
1310	DB00671	cefixime	8.8e-06	HL60	0.519854	0.04	0.173665
502	DB06819	sodium phenylbutyrate	0.0002	SKMEL5	0.519379	0.01	0.122984
4159		tetroquinone	2.1e-05	MCF7	0.519179	0.03	0.165162
4953	DB11820	nifurtimox	1.4e-05	MCF7	0.518779	0.02	0.148418
1527	DB13597	moroxydine	1.92e-05	MCF7	0.518149	0.02	0.148418
1319	DB01330	cefotetan	7e-06	HL60	0.51812	0.01	0.122984
7241	DB00244	mesalazine	2.62e-05	MCF7	0.514739	0.03	0.165162
3002	DB00641	simvastatin	9.6e-06	HL60	0.513913	0.01	0.122984
5100	DB01176	cyclizine	1.32e-05	PC3	0.512289	0.02	0.148418
2046	DB00589	lisuride	1.18e-05	HL60	0.511906	0.02	0.148418
7314	DB13407	nifenazone	1.3e-05	PC3	0.511781	0.04	0.173665
7317		Prestwick-1103	1.96e-05	PC3	0.511295	0.04	0.173665
3251	DB00395	carisoprodol	1.54e-05	MCF7	0.511028	0.01	0.122984
462	DB00197	troglitazone	1e-05	PC3	0.509161	0.02	0.148418
4826		7-aminocephalosporanic acid	1.46e-05	MCF7	0.508957	0.05	0.180902
6317		coralyne	9.6e-06	PC3	0.508507	0.05	0.180902
6378	DB00580	valdecoxib	1e-05	PC3	0.508422	0	0
1294	DB04703	hesperidin	6.6e-06	HL60	0.506868	0.03	0.165162
1330		Chicago Sky Blue 6B	4e-06	HL60	0.506843	0.01	0.122984
4319	DB06145	spiramycin	4.8e-06	PC3	0.506717	0.02	0.148418
424	DB02656	LY-294002	1e-07	MCF7	0.506675	0.02	0.148418
2794		trichostatin A	1e-07	MCF7	0.506403	0.05	0.180902
7168	DB01119	diazoxide	1.74e-05	MCF7	0.505917	0.02	0.148418
1212		trichostatin A	1e-07	PC3	0.505798	0.05	0.180902
7295		homochlorcyclizine	1.04e-05	PC3	0.505388	0.01	0.122984
1473	DB00366	doxylamine	1.02e-05	MCF7	0.505259	0.03	0.165162
4078		tetroquinone	2.1e-05	PC3	0.505168	0	0
2959	DB00680	moracizine	8.6e-06	HL60	0.50502	0.07	0.193563
4508	DB00264	metoprolol	5.8e-06	PC3	0.50362	0.01	0.122984
1232	DB00197	troglitazone	1e-05	PC3	0.503235	0.06	0.187021
3072	DB01954	rolipram	1.46e-05	HL60	0.502882	0.04	0.173665
5465	DB01604	pivampicillin	8.6e-06	MCF7	0.501527	0.06	0.187021
6691	DB01095	fluvastatin	9.2e-06	PC3	0.50076	0.01	0.122984
7021	DB08989	etamivan	1.8e-05	MCF7	0.500579	0.05	0.180902
5860	DB13642	pridinol	1.02e-05	PC3	0.500187	0.03	0.165162
1719	DB00608	chloroquine	7.8e-06	HL60	0.49925	0.03	0.165162
5795	DB00944	demecarium bromide	5.6e-06	PC3	0.498504	0.02	0.148418
4571	DB01235	levodopa	2.02e-05	PC3	0.498358	0.01	0.122984
495		pirinixic acid	0.0001	SKMEL5	0.498164	0.05	0.180902
1332	DB00924	cyclobenzaprine	1.28e-05	HL60	0.497649	0	0
2427	DB00639	butoconazole	8.4e-06	HL60	0.497029	0.07	0.193563
1290	DB00450	droperidol	1.06e-05	HL60	0.496797	0.02	0.148418
2361	DB00808	indapamide	1.06e-05	HL60	0.494353	0.08	0.197251
1857	DB00605	sulindac	1.12e-05	HL60	0.494129	0.01	0.122984
1383	DB00994	neomycin	4.2e-06	HL60	0.493787	0.01	0.122984
7245		trichostatin A	1e-07	PC3	0.493752	0.01	0.122984
7073		trichostatin A	1e-06	PC3	0.493648	0.03	0.165162
1597	DB00467	enoxacin	1.24e-05	HL60	0.49312	0.02	0.148418
2814	DB09355	sulfabenzamide	1.44e-05	MCF7	0.491743	0.05	0.180902
1600	DB00622	nicardipine	7.8e-06	HL60	0.491738	0.02	0.148418
2002	DB00662	trimethobenzamide	9.4e-06	HL60	0.491257	0.02	0.148418
7284	DB09167	dosulepin	1.2e-05	PC3	0.490724	0.03	0.165162
6993		trichostatin A	1e-06	MCF7	0.490072	0.04	0.173665
5749	DB00981	physostigmine	6.2e-06	PC3	0.488786	0.01	0.122984
345	DB00313	valproic acid	0.01	MCF7	0.488447	0.02	0.148418
2990	DB01051	novobiocin	6.4e-06	HL60	0.487867	0.01	0.122984
3087	DB01054	nitrendipine	1.1e-05	HL60	0.48775	0.05	0.180902
2352	DB00750	prilocaine	1.56e-05	HL60	0.486803	0.02	0.148418
1182	DB00783	estradiol	1e-08	HL60	0.486364	0.04	0.173665
2150		harman	1.82e-05	HL60	0.485825	0.06	0.187021
1496	DB00350	minoxidil	1.92e-05	MCF7	0.485548	0.04	0.173665
5470	DB11458	roxarsone	1.52e-05	MCF7	0.485481	0.02	0.148418
1866	DB13574	heptaminol	2.2e-05	HL60	0.484885	0.02	0.148418
7136		trichostatin A	1e-07	PC3	0.484789	0.04	0.173665
1164	DB00179	nordihydroguaiaretic acid	1e-06	HL60	0.484566	0.01	0.122984
7077		trichostatin A	1e-06	PC3	0.484546	0.05	0.180902
3840	DB00436	bendroflumethiazide	9.4e-06	MCF7	0.484461	0.06	0.187021
2390	DB00357	aminoglutethimide	1.72e-05	HL60	0.484285	0.08	0.197251
7550		trichostatin A	1e-06	MCF7	0.48406	0.04	0.173665
5757	DB00759	tetracycline	8.4e-06	PC3	0.483679	0.04	0.173665
7074	DB11841	MS-275	1e-05	PC3	0.481214	0.04	0.173665
4682	DB00845	clofazimine	8.4e-06	PC3	0.480973	0.04	0.173665
4444	DB02546	vorinostat	1e-05	PC3	0.480895	0.02	0.148418
7547		BCB000038	1e-05	PC3	0.480423	0.04	0.173665
6195	DB02656	LY-294002	1e-05	HL60	0.480183	0.05	0.180902
5566	DB05134	tanespimycin	1e-06	MCF7	0.478749	0.02	0.148418
410	DB00313	valproic acid	0.01	HL60	0.478647	0.08	0.197251
1	DB00331	metformin	1e-05	MCF7	0.47818	0.06	0.187021
6933	DB12442	alvespimycin	1e-07	MCF7	0.477011	0.03	0.165162
6286	DB00841	dobutamine	1.18e-05	PC3	0.476979	0.07	0.193563
1387	DB13327	picotamide	1.02e-05	HL60	0.476135	0	0
2123	DB13836	metampicillin	1.04e-05	PC3	0.475951	0.05	0.180902
4685	DB00373	timolol	9.2e-06	PC3	0.475576	0.06	0.187021
5882		trichostatin A	1e-07	PC3	0.475378	0	0
5822		trichostatin A	1e-07	PC3	0.474206	0.04	0.173665
5103	DB00605	sulindac	1.12e-05	PC3	0.474083	0.08	0.197251
3832		pempidine	1.3e-05	MCF7	0.473888	0.04	0.173665
4416	DB13720	diphemanil metilsulfate	1.02e-05	MCF7	0.473684	0.04	0.173665
7268	DB08942	isoxicam	1.2e-05	PC3	0.473211	0.07	0.193563
2257	DB00848	levamisole	1.66e-05	MCF7	0.473112	0.08	0.197251
2336	DB00779	nalidixic acid	1.46e-05	HL60	0.472919	0.1	0.207695
4664		3-acetylcoumarin	2.12e-05	PC3	0.47157	0.06	0.187021
6907		PF-00562151-00	1e-05	PC3	0.471283	0.08	0.197251
3692		PNU-0251126	1e-06	PC3	0.469838	0.03	0.165162
7269	DB06736	aceclofenac	1.12e-05	PC3	0.469166	0.02	0.148418
421	DB00831	trifluoperazine	1e-05	MCF7	0.468446	0.04	0.173665
3610	DB00663	flumetasone	9.8e-06	MCF7	0.46823	0.01	0.122984
5400	DB13399	terguride	1.18e-05	MCF7	0.468209	0.06	0.187021
5750		chloropyrazine	3.5e-05	PC3	0.467871	0.07	0.193563
5849	DB01016	glibenclamide	8e-06	PC3	0.467768	0.03	0.165162
1234		trichostatin A	1e-06	PC3	0.465718	0.11	0.210213
6552	DB00917	dinoprostone	1e-05	MCF7	0.465158	0.07	0.193563
2183	DB09401	isosorbide	1.7e-05	HL60	0.464536	0.11	0.210213
381	DB05134	tanespimycin	1e-06	MCF7	0.464366	0	0
3016		Prestwick-857	1.22e-05	HL60	0.463865	0.08	0.197251
4659	DB02187	equilin	1.5e-05	PC3	0.463676	0.03	0.165162
7267		Prestwick-1082	1.2e-05	PC3	0.462258	0.08	0.197251
2155		vitexin	9.2e-06	HL60	0.461828	0.12	0.210647
1378	DB04821	nomifensine	1.12e-05	HL60	0.461484	0.02	0.148418
6684	DB00741	hydrocortisone	1.1e-05	PC3	0.461136	0.08	0.197251
2131	DB00674	galantamine	1.08e-05	HL60	0.461078	0.07	0.193563
3173	DB08799	antazoline	1.32e-05	MCF7	0.460979	0.05	0.180902
307	DB00605	sulindac	5e-05	MCF7	0.460482	0.08	0.197251
2027	DB13597	moroxydine	1.92e-05	HL60	0.45998	0.05	0.180902
7526		15(S)-15-methylprostaglandin E2	1e-05	PC3	0.459667	0.07	0.193563
2157		hydroxyachillin	1.42e-05	HL60	0.459037	0.06	0.187021
1145	DB00945	acetylsalicylic acid	0.0001	HL60	0.45893	0.01	0.122984
2142	DB00223	diflorasone	8e-06	HL60	0.457653	0.06	0.187021
6143		trichostatin A	1e-07	HL60	0.457608	0.06	0.187021
1150	DB00313	valproic acid	0.001	HL60	0.456279	0.05	0.180902
4970	DB00999	hydrochlorothiazide	1.34e-05	MCF7	0.456251	0.07	0.193563
1241	DB00783	estradiol	1e-08	PC3	0.455429	0.03	0.165162
2964	DB00505	tridihexethyl	1.14e-05	HL60	0.454505	0.03	0.165162
448		trichostatin A	1e-07	PC3	0.45437	0.05	0.180902
3786	DB01219	dantrolene	1.18e-05	PC3	0.45367	0.04	0.173665
4171	DB01600	tiaprofenic acid	1.54e-05	MCF7	0.4533	0.06	0.187021
983	DB00502	haloperidol	1e-05	MCF7	0.452544	0.02	0.148418
2105		trichostatin A	1e-07	PC3	0.452449	0.04	0.173665
7387		trichostatin A	1e-07	PC3	0.452248	0.09	0.203033
4251	DB01435	phenazone	2.12e-05	PC3	0.451764	0.07	0.193563
6544		5155877	1e-05	PC3	0.451653	0.08	0.197251
5230	DB00412	rosiglitazone	1e-05	MCF7	0.451616	0.07	0.193563
2931	DB01056	tocainide	1.74e-05	HL60	0.450088	0.03	0.165162
1149	DB00783	estradiol	1e-07	HL60	0.449903	0.04	0.173665
5210	DB12442	alvespimycin	1e-07	MCF7	0.449782	0.06	0.187021
2206	DB01216	finasteride	1.08e-05	HL60	0.448876	0.09	0.203033
3574		piperacetazine	9.8e-06	MCF7	0.448799	0.08	0.197251
4321		ethoxyquin	1.84e-05	PC3	0.448687	0.07	0.193563
4978	DB00227	lovastatin	9.8e-06	MCF7	0.44787	0.1	0.207695
6702	DB00627	nicotinic acid	3.24e-05	PC3	0.447713	0.06	0.187021
7271	DB01186	pergolide	9.8e-06	PC3	0.4476	0.03	0.165162
5572		trichostatin A	1e-07	MCF7	0.447413	0.05	0.180902
5308		trichostatin A	1e-07	MCF7	0.447235	0.05	0.180902
5209		trichostatin A	1e-07	MCF7	0.446737	0.07	0.193563
3791		trichostatin A	1e-07	PC3	0.445041	0.05	0.180902
3848	DB00266	dicoumarol	1.18e-05	MCF7	0.444888	0.07	0.193563
1014		trichostatin A	1e-06	MCF7	0.44391	0.06	0.187021
2669	DB00313	valproic acid	0.001	HL60	0.443299	0.09	0.203033
7105		trichostatin A	1e-06	PC3	0.443286	0.06	0.187021
6802	DB13793	vinburnine	1.36e-05	MCF7	0.443002	0.03	0.165162
4971		Chicago Sky Blue 6B	4e-06	MCF7	0.442856	0.07	0.193563
3861	DB13431	proglumide	1.2e-05	MCF7	0.442418	0.05	0.180902
5904		AG-013608	1e-05	MCF7	0.441973	0.01	0.122984
3802	DB00780	phenelzine	1.7e-05	PC3	0.440143	0.03	0.165162
2693	DB00412	rosiglitazone	1e-05	HL60	0.439859	0.04	0.173665
4744	DB00809	tropicamide	1.4e-05	MCF7	0.439138	0.05	0.180902
2309	DB00809	tropicamide	1.4e-05	MCF7	0.43898	0.07	0.193563
6736		trichostatin A	1e-07	PC3	0.438934	0.04	0.173665
1468	DB00805	minaprine	1.08e-05	MCF7	0.438686	0.05	0.180902
6469	DB01428	oxybenzone	1.76e-05	MCF7	0.437238	0.07	0.193563
6558		5194442	2e-05	MCF7	0.437232	0.08	0.197251
4506	DB03585	oxyphenbutazone	1.24e-05	PC3	0.436799	0.03	0.165162
2197	DB08936	chlorcyclizine	1.18e-05	HL60	0.436746	0.13	0.214035
5468	DB00328	indometacin	1.12e-05	MCF7	0.436713	0.08	0.197251
5767	DB00755	tretinoin	1.34e-05	PC3	0.436208	0.04	0.173665
1541	DB09093	chlortetracycline	7.8e-06	MCF7	0.436196	0.08	0.197251
4405	DB00804	dicycloverine	1.16e-05	MCF7	0.435755	0.06	0.187021
1162	DB00877	sirolimus	1e-07	HL60	0.435665	0.02	0.148418
5755	DB11696	racecadotril	1.04e-05	PC3	0.434853	0.06	0.187021
6908		BAS-012416453	3.8e-05	MCF7	0.43442	0.04	0.173665
2349	DB01275	hydralazine	2.04e-05	HL60	0.434152	0.04	0.173665
3565	DB00869	dorzolamide	1.1e-05	MCF7	0.434004	0.08	0.197251
3392		thioperamide	9.8e-06	MCF7	0.433696	0.07	0.193563
4670	DB00363	clozapine	1.22e-05	PC3	0.433118	0.1	0.207695
6467	DB00488	altretamine	1.9e-05	MCF7	0.432272	0.1	0.207695
6546		trichostatin A	1e-06	PC3	0.431406	0.08	0.197251
2450		trichostatin A	1e-07	HL60	0.430894	0.06	0.187021
6056		benzamil	1.12e-05	MCF7	0.430886	0.08	0.197251
348	DB00313	valproic acid	5e-05	MCF7	0.430749	0.07	0.193563
2638	DB01055	mimosine	2.02e-05	MCF7	0.430292	0.03	0.165162
5688	DB00488	altretamine	1.9e-05	MCF7	0.429972	0.03	0.165162
6667	DB00351	megestrol	1.04e-05	PC3	0.429927	0.04	0.173665
3066	DB00733	pralidoxime	2.32e-05	HL60	0.429872	0.09	0.203033
6346	DB00795	sulfasalazine	1e-05	PC3	0.429319	0.12	0.210647
4658		lorglumide	8.4e-06	PC3	0.428498	0.05	0.180902
2367	DB13374	vincamine	1.12e-05	HL60	0.428408	0.05	0.180902
6742	DB00411	carbachol	2.18e-05	PC3	0.428255	0.05	0.180902
2212	DB00675	tamoxifen	7e-06	MCF7	0.427682	0.08	0.197251
5336		trichostatin A	1e-07	MCF7	0.426953	0.04	0.173665
1231		15-delta prostaglandin J2	1e-05	PC3	0.426647	0.06	0.187021
7506	DB01132	pioglitazone	1e-05	MCF7	0.426585	0.05	0.180902
7555		trichostatin A	1e-06	PC3	0.42643	0.07	0.193563
6493		trichostatin A	1e-07	MCF7	0.425466	0.08	0.197251
3998		etifenin	1.24e-05	PC3	0.425438	0.07	0.193563
5790		tropine	2.84e-05	PC3	0.424323	0.1	0.207695
2969	DB02527	cyclic adenosine monophosphate	1.22e-05	HL60	0.424201	0.13	0.214035
4280	DB00809	tropicamide	1.4e-05	PC3	0.423427	0.06	0.187021
6199	DB00313	valproic acid	0.0005	HL60	0.422916	0.07	0.193563
483	DB00619	imatinib	1e-05	PC3	0.422534	0.07	0.193563
5827	DB00834	mifepristone	9.4e-06	PC3	0.421526	0.04	0.173665
481		pirinixic acid	0.0001	PC3	0.421266	0.04	0.173665
5014	DB13740	bemegride	2.58e-05	MCF7	0.420667	0.07	0.193563
608		NU-1025	0.0001	MCF7	0.420376	0.03	0.165162
6043		Prestwick-685	1.06e-05	MCF7	0.420322	0.06	0.187021
4620	DB11622	dehydrocholic acid	9.6e-06	PC3	0.420018	0.08	0.197251
3739		foliosidine	1.3e-05	PC3	0.419967	0.1	0.207695
3766	DB00266	dicoumarol	1.18e-05	PC3	0.419788	0.09	0.203033
5738		mevalolactone	3.08e-05	PC3	0.41978	0.12	0.210647
2081	DB00320	dihydroergotamine	3e-06	PC3	0.41952	0.08	0.197251
6734		metanephrine	1.72e-05	PC3	0.419356	0.06	0.187021
3741		karakoline	1.06e-05	PC3	0.41896	0.08	0.197251
3815	DB00763	thiamazole	3.5e-05	PC3	0.418658	0.09	0.203033
6872	DB00947	fulvestrant	1e-06	MCF7	0.418496	0.13	0.214035
7503		trichostatin A	1e-06	PC3	0.417805	0.1	0.207695
6905	DB01083	orlistat	1e-05	MCF7	0.417619	0.09	0.203033
2129		retrorsine	1.14e-05	HL60	0.417469	0.09	0.203033
5663	DB01035	procainamide	1.48e-05	MCF7	0.417309	0.06	0.187021
3137	DB11549	tiletamine	1.54e-05	HL60	0.416797	0.1	0.207695
2731	DB00996	gabapentin	2.34e-05	HL60	0.416526	0.09	0.203033
5474	DB00717	norethisterone	1.34e-05	MCF7	0.416002	0.12	0.210647
5948	DB11457	rotenone	1e-06	PC3	0.415232	0.11	0.210213
5112	DB00297	bupivacaine	1.24e-05	PC3	0.414921	0.12	0.210647
464		pirinixic acid	0.0001	PC3	0.414919	0.14	0.215059
1520		azacyclonol	1.5e-05	MCF7	0.414846	0.13	0.214035
1733	DB00795	sulfasalazine	1e-05	HL60	0.414845	0.04	0.173665
5420	DB08958	hexetidine	1.18e-05	MCF7	0.41457	0.11	0.210213
6893	DB01132	pioglitazone	1e-05	PC3	0.414231	0.06	0.187021
2708	DB00473	hexylcaine	1.34e-05	HL60	0.413745	0.13	0.214035
5930	DB01132	pioglitazone	1e-05	PC3	0.413505	0.07	0.193563
5809	DB00826	natamycin	6e-06	PC3	0.413427	0.06	0.187021
4075	DB01578	metrizamide	5e-06	PC3	0.413162	0.03	0.165162
4758		0179445-0000	1e-06	MCF7	0.412153	0.1	0.207695
3878		Prestwick-1080	1.5e-05	MCF7	0.41204	0.13	0.214035
3944	DB11461	sulfachlorpyridazine	1.4e-05	MCF7	0.411969	0.03	0.165162
2258	DB01041	thalidomide	1.54e-05	MCF7	0.411428	0.12	0.210647
610	DB04331	monastrol	0.0001	MCF7	0.410129	0.15	0.21765
5453	DB00321	amitriptyline	1.28e-05	MCF7	0.409919	0.08	0.197251
5475		Prestwick-920	1.36e-05	MCF7	0.409442	0.08	0.197251
7546		16-phenyltetranorprostaglandin E2	1e-05	PC3	0.409402	0.1	0.207695
4455		15-delta prostaglandin J2	1e-05	PC3	0.409127	0.04	0.173665
5055	DB00717	norethisterone	1.34e-05	PC3	0.409089	0.08	0.197251
6035		heliotrine	1.28e-05	MCF7	0.409046	0.09	0.203033
5119	DB01130	prednicarbate	8.2e-06	PC3	0.408651	0.12	0.210647
664		docosahexaenoic acid ethyl ester	0.0001	PC3	0.408177	0.11	0.210213
370	DB00197	troglitazone	1e-05	HL60	0.407994	0.08	0.197251
1485	DB08941	isoxsuprine	1.18e-05	MCF7	0.407928	0.05	0.180902
5976		trichostatin A	1e-06	MCF7	0.407061	0.05	0.180902
1950	DB01321	josamycin	4.8e-06	PC3	0.406746	0.06	0.187021
4107		cinchonine	1.36e-05	MCF7	0.406534	0.11	0.210213
5853	DB00602	ivermectin	4.6e-06	PC3	0.405868	0.12	0.210647
3462		trichostatin A	1e-07	MCF7	0.405774	0.07	0.193563
2167	DB01086	benzocaine	2.42e-05	HL60	0.405554	0.15	0.21765
6176	DB00477	chlorpromazine	1e-06	HL60	0.405533	0.1	0.207695
3636		foliosidine	1.3e-05	MCF7	0.40332	0.09	0.203033
6876		BAS-012416453	3.8e-05	PC3	0.403224	0.09	0.203033
4464	DB00313	valproic acid	0.0005	PC3	0.403155	0.08	0.197251
6037	DB09018	bromopride	1.16e-05	MCF7	0.402638	0.05	0.180902
6287	DB00661	verapamil	8.2e-06	PC3	0.40239	0.05	0.180902
5628		bephenium hydroxynaphthoate	9e-06	MCF7	0.402075	0.11	0.210213
3095	DB00712	flurbiprofen	1.64e-05	HL60	0.402054	0.14	0.215059
1274	DB01244	bepridil	1e-05	HL60	0.402033	0.01	0.122984
2044	DB00787	aciclovir	1.78e-05	HL60	0.401803	0.01	0.122984
7505		16-phenyltetranorprostaglandin E2	1e-05	MCF7	0.40148	0.08	0.197251
2234	DB00670	pirenzepine	9.4e-06	MCF7	0.401467	0.07	0.193563
5399	DB00389	carbimazole	2.14e-05	MCF7	0.401439	0.13	0.214035
2424	DB00737	meclozine	8.6e-06	HL60	0.400844	0.03	0.165162
6579		trichostatin A	1e-06	MCF7	0.400653	0.09	0.203033
6198	DB02656	LY-294002	1e-05	HL60	0.400546	0.1	0.207695
3312		trichostatin A	1e-07	MCF7	0.399755	0.06	0.187021
5270		thioperamide	9.8e-06	MCF7	0.399705	0.07	0.193563
6604	DB06711	naphazoline	1.62e-05	PC3	0.399589	0.08	0.197251
3111	DB04711	adipiodone	3.6e-06	HL60	0.398794	0.13	0.214035
1244	DB00502	haloperidol	1e-05	PC3	0.398647	0.1	0.207695
4125		N-acetyl-L-aspartic acid	2.28e-05	MCF7	0.398574	0.06	0.187021
4593	DB00609	ethionamide	2.4e-05	PC3	0.398324	0.14	0.215059
6285	DB01060	amoxicillin	1.1e-05	PC3	0.398251	0.04	0.173665
6879		trichostatin A	1e-06	MCF7	0.39816	0.13	0.214035
7282	DB13284	meticrane	1.46e-05	PC3	0.398046	0.04	0.173665
5728		tetrahydroalstonine	1.14e-05	PC3	0.397983	0.11	0.210213
2773	DB00944	demecarium bromide	5.6e-06	MCF7	0.397344	0.11	0.210213
3204	DB01297	practolol	1.5e-05	MCF7	0.397229	0.09	0.203033
3402	DB00794	primidone	1.84e-05	MCF7	0.397028	0.09	0.203033
663		U0125	1e-06	PC3	0.395625	0.07	0.193563
6062	DB01216	finasteride	1.08e-05	MCF7	0.393728	0.11	0.210213
6870		SC-560	1e-05	MCF7	0.393654	0.14	0.215059
422	DB00679	thioridazine	1e-06	MCF7	0.393618	0.08	0.197251
5974		PF-00539745-00	1e-05	MCF7	0.392865	0.15	0.21765
5427	DB01148	flavoxate	9.4e-06	MCF7	0.392763	0.1	0.207695
2698	DB00947	fulvestrant	1e-08	HL60	0.392187	0.08	0.197251
6608	DB11820	nifurtimox	1.4e-05	PC3	0.39205	0.08	0.197251
2368	DB00687	fludrocortisone	9.4e-06	HL60	0.391897	0.09	0.203033
3352	DB00782	propantheline bromide	9e-06	MCF7	0.391894	0.08	0.197251
4363		2,6-dimethylpiperidine	2.68e-05	MCF7	0.391692	0.07	0.193563
3829	DB04843	mepenzolate bromide	9.6e-06	MCF7	0.391482	0.08	0.197251
3845	DB00319	piperacillin	7.4e-06	MCF7	0.390319	0.09	0.203033
3142	DB00811	ribavirin	1.64e-05	HL60	0.389183	0.11	0.210213
5429	DB13227	tribenoside	8.4e-06	MCF7	0.388941	0.14	0.215059
3968		PHA-00851261E	1e-06	MCF7	0.388846	0.12	0.210647
1482	DB08960	hexamethonium bromide	1e-05	MCF7	0.388225	0.07	0.193563
430	DB00412	rosiglitazone	1e-05	PC3	0.387927	0.14	0.215059
5097	DB00832	phensuximide	2.12e-05	PC3	0.387858	0.07	0.193563
4710		trichostatin A	1e-07	MCF7	0.387775	0.03	0.165162
1240	DB00313	valproic acid	0.0005	PC3	0.387719	0.07	0.193563
494	DB00623	fluphenazine	1e-05	SKMEL5	0.387453	0.08	0.197251
3809	DB00754	ethotoin	1.96e-05	PC3	0.386524	0.06	0.187021
2767	DB13718	hydroquinine	9.4e-06	MCF7	0.385798	0.02	0.148418
258	DB02656	LY-294002	1e-05	MCF7	0.385192	0.13	0.214035
5434	DB12478	piribedil	1.2e-05	MCF7	0.384752	0.12	0.210647
2904		trichostatin A	1e-07	HL60	0.38444	0.03	0.165162
6741	DB01085	pilocarpine	1.48e-05	PC3	0.383873	0.13	0.214035
5486	DB00505	tridihexethyl	1.14e-05	MCF7	0.383871	0.08	0.197251
4200	DB00249	idoxuridine	1.12e-05	PC3	0.3836	0.11	0.210213
6675	DB13340	suloctidil	1.18e-05	PC3	0.383308	0.1	0.207695
4474	DB00259	sulfanilamide	2.32e-05	PC3	0.382589	0.11	0.210213
4576	DB13483	etamsylate	1.52e-05	PC3	0.382401	0.11	0.210213
3091	DB00351	megestrol	1.04e-05	HL60	0.382229	0.13	0.214035
6703	DB01055	mimosine	2.02e-05	PC3	0.382224	0.11	0.210213
442		oligomycin	1e-06	MCF7	0.382075	0.09	0.203033
7375	DB01090	pentolonium	7.4e-06	PC3	0.382067	0.08	0.197251
2712	DB06821	sulfametoxydiazine	1.42e-05	HL60	0.381869	0.1	0.207695
3811	DB09345	pramocaine	1.22e-05	PC3	0.38155	0.1	0.207695
6821		pipenzolate bromide	9.2e-06	MCF7	0.381546	0.14	0.215059
4175		4-hydroxyphenazone	1.96e-05	MCF7	0.381459	0.15	0.21765
3687	DB00986	glycopyrronium bromide	1e-05	PC3	0.380661	0.14	0.215059
2988	DB13499	cefsulodin	7.2e-06	HL60	0.380305	0.11	0.210213
4073	DB14038	sitosterol	9.6e-06	PC3	0.380152	0.07	0.193563
6919		scriptaid	1e-05	PC3	0.379718	0.13	0.214035
4307		pempidine	1.3e-05	PC3	0.379587	0.11	0.210213
5945		trichostatin A	1e-06	MCF7	0.379391	0.13	0.214035
3827		PHA-00745360	1e-06	PC3	0.379345	0.1	0.207695
383	DB14206	cobalt chloride	0.0001	MCF7	0.378939	0.09	0.203033
6061	DB01146	diphenylpyraline	1.26e-05	MCF7	0.378755	0.1	0.207695
3203	DB00346	alfuzosin	9.4e-06	MCF7	0.378152	0.08	0.197251
6434		trichostatin A	1e-06	MCF7	0.377642	0.11	0.210213
6729	DB00199	erythromycin	5.4e-06	PC3	0.377564	0.16	0.221768
411	DB06819	sodium phenylbutyrate	0.001	HL60	0.376853	0.04	0.173665
5908		trichostatin A	1e-06	PC3	0.376267	0.11	0.210213
7533		11-deoxy-16,16-dimethylprostaglandin E2	1e-05	MCF7	0.376189	0.07	0.193563
2402	DB06777	chenodeoxycholic acid	1.02e-05	HL60	0.375771	0.08	0.197251
6690	DB01099	flucytosine	3.1e-05	PC3	0.375157	0.14	0.215059
4437	DB12442	alvespimycin	1e-07	PC3	0.375049	0.14	0.215059
5786	DB06148	mianserin	1.32e-05	PC3	0.374166	0.12	0.210647
2952		betulin	9e-06	HL60	0.374029	0.07	0.193563
4954		trichostatin A	1e-07	MCF7	0.373953	0.08	0.197251
4580	DB00394	beclometasone	7.6e-06	PC3	0.373602	0.12	0.210647
2674	DB00313	valproic acid	0.0002	HL60	0.373301	0.11	0.210213
4478	DB00575	clonidine	1.5e-05	PC3	0.373199	0.18	0.230769
3564	DB00760	meropenem	1.04e-05	MCF7	0.373174	0.12	0.210647
7324		trichostatin A	1e-07	MCF7	0.372698	0.04	0.173665
4237		trichostatin A	1e-07	PC3	0.371971	0.11	0.210213
347	DB00313	valproic acid	0.0005	MCF7	0.371716	0.15	0.21765
4143	DB00931	metacycline	8.4e-06	MCF7	0.370867	0.07	0.193563
361	DB02656	LY-294002	1e-05	HL60	0.37052	0.14	0.215059
2897		lobelanidine	1.06e-05	MCF7	0.370347	0.1	0.207695
6820		trichostatin A	1e-07	MCF7	0.370233	0.12	0.210647
3985	DB13179	troleandomycin	5e-06	PC3	0.36963	0.09	0.203033
2160		Prestwick-642	1.38e-05	HL60	0.3694	0.12	0.210647
4315	DB00436	bendroflumethiazide	9.4e-06	PC3	0.368957	0.18	0.230769
2260	DB11156	pyrantel	1.12e-05	MCF7	0.368534	0.11	0.210213
6142	DB00869	dorzolamide	1.1e-05	HL60	0.368418	0.09	0.203033
4483		trichostatin A	1e-07	PC3	0.368199	0.2	0.242304
2994		Prestwick-864	3.5e-05	HL60	0.367847	0.17	0.225337
6910		trichostatin A	1e-06	MCF7	0.367722	0.07	0.193563
3720	DB09401	isosorbide	1.7e-05	PC3	0.367614	0.11	0.210213
3217	DB00397	phenylpropanolamine	2.14e-05	MCF7	0.367105	0.11	0.210213
6620	DB08960	hexamethonium bromide	1e-05	PC3	0.366984	0.09	0.203033
5518	DB00564	carbamazepine	1.7e-05	MCF7	0.366914	0.15	0.21765
4279	DB08981	fenbufen	1.58e-05	PC3	0.366653	0.09	0.203033
5065		trichostatin A	1e-07	PC3	0.366393	0.13	0.214035
4527	DB00615	rifabutin	4.8e-06	PC3	0.366166	0.14	0.215059
5928		PF-00875133-00	1e-05	PC3	0.365762	0.13	0.214035
2393	DB00860	prednisolone	1.1e-05	HL60	0.365548	0.05	0.180902
5964	DB00947	fulvestrant	1e-06	MCF7	0.365351	0.15	0.21765
2373	DB01148	flavoxate	9.4e-06	HL60	0.364069	0.09	0.203033
4220	DB12831	gabexate	9.6e-06	PC3	0.363101	0.09	0.203033
3822		CP-320650-01	1e-05	PC3	0.362691	0.11	0.210213
5748	DB11502	butacaine	1.3e-05	PC3	0.362644	0.15	0.21765
5482	DB00651	diprophylline	1.58e-05	MCF7	0.362235	0.18	0.230769
4291		PNU-0230031	1e-06	PC3	0.361994	0.15	0.21765
2573		atractyloside	5e-06	HL60	0.361665	0.13	0.214035
3799		parbendazole	1.62e-05	PC3	0.360866	0.1	0.207695
497	DB00313	valproic acid	0.001	ssMCF7	0.36065	0.1	0.207695
5580	DB02546	vorinostat	1e-05	MCF7	0.359873	0.16	0.221768
5867	DB00994	neomycin	4.2e-06	PC3	0.359322	0.1	0.207695
5401	DB00514	dextromethorphan	1.08e-05	MCF7	0.359239	0.1	0.207695
6368		PF-01378883-00	1e-05	PC3	0.35814	0.14	0.215059
3011	DB08800	chloropyramine	1.22e-05	HL60	0.357298	0.17	0.225337
4530	DB00991	oxaprozin	1.36e-05	PC3	0.357264	0.12	0.210647
4456	DB00197	troglitazone	1e-05	PC3	0.357201	0.09	0.203033
7490	DB00947	fulvestrant	1e-06	MCF7	0.357072	0.11	0.210213
364		trichostatin A	1e-07	HL60	0.356836	0.12	0.210647
5672	DB06439	tyloxapol	4e-06	MCF7	0.356727	0.11	0.210213
2895	DB13345	dihydroergocristine	5.6e-06	MCF7	0.355292	0.11	0.210213
4529	DB01325	quinethazone	1.38e-05	PC3	0.354672	0.14	0.215059
1884	DB00501	cimetidine	1.58e-05	PC3	0.354525	0.15	0.21765
4153		trichostatin A	1e-07	MCF7	0.354497	0.14	0.215059
5625		trichostatin A	1e-07	MCF7	0.353795	0.15	0.21765
498		tetraethylenepentamine	0.0001	ssMCF7	0.353734	0.11	0.210213
2716		hecogenin	9.2e-06	HL60	0.353621	0.14	0.215059
3107		adrenosterone	1.34e-05	HL60	0.353027	0.1	0.207695
4458		trichostatin A	1e-06	PC3	0.352946	0.11	0.210213
4198	DB01021	trichlormethiazide	1.06e-05	PC3	0.352861	0.15	0.21765
4587		tetramisole	1.66e-05	PC3	0.352391	0.19	0.235953
3510		trichostatin A	1e-07	MCF7	0.352049	0.12	0.210647
5605	DB00346	alfuzosin	9.4e-06	MCF7	0.351996	0.17	0.225337
4165	DB00347	trimethadione	2.8e-05	MCF7	0.351744	0.11	0.210213
2268		trichostatin A	1e-07	MCF7	0.350834	0.22	0.258127
461	DB02656	LY-294002	1e-05	PC3	0.350814	0.14	0.215059
2503	DB13232	suxibuzone	9.2e-06	HL60	0.350585	0.17	0.225337
3523		S-propranolol	1.36e-05	MCF7	0.35031	0.14	0.215059
5436		scopolamine N-oxide	1e-05	MCF7	0.350237	0.12	0.210647
2777		trichostatin A	1e-07	MCF7	0.349408	0.13	0.214035
2191	DB11461	sulfachlorpyridazine	1.4e-05	HL60	0.349196	0.1	0.207695
3081		(-)-MK-801	1.18e-05	HL60	0.349189	0.05	0.180902
4313		furaltadone	1.1e-05	PC3	0.348923	0.14	0.215059
331		trichostatin A	1e-07	MCF7	0.348718	0.13	0.214035
4274	DB00573	fenoprofen	7.2e-06	PC3	0.348394	0.18	0.230769
2564	DB01327	cefazolin	8.4e-06	HL60	0.348236	0.19	0.235953
2459	DB00336	nitrofural	2.02e-05	HL60	0.348196	0.13	0.214035
2720	DB01625	isopropamide iodide	8.4e-06	HL60	0.347891	0.05	0.180902
2397	DB00584	enalapril	8.2e-06	HL60	0.347881	0.08	0.197251
2380	DB01627	lincomycin	9e-06	HL60	0.347846	0.05	0.180902
3736		0179445-0000	1e-06	PC3	0.34748	0.2	0.242304
4020		canadine	1.18e-05	PC3	0.347478	0.11	0.210213
5391	DB00672	chlorpropamide	1.44e-05	MCF7	0.347225	0.17	0.225337
488	DB01088	iloprost	1e-06	MCF7	0.347208	0.14	0.215059
5057	DB00214	torasemide	1.14e-05	PC3	0.346943	0.1	0.207695
2513		delsoline	8.6e-06	HL60	0.346923	0.2	0.242304
4642	DB00629	guanabenz	1.38e-05	PC3	0.346213	0.17	0.225337
3795		santonin	1.62e-05	PC3	0.345768	0.15	0.21765
6696	DB12661	urapidil	9.4e-06	PC3	0.345593	0.11	0.210213
3892	DB00754	ethotoin	1.96e-05	MCF7	0.345383	0.03	0.165162
4435	DB00755	tretinoin	1e-06	PC3	0.345236	0.11	0.210213
3704	DB11430	monensin	5.8e-06	PC3	0.344999	0.17	0.225337
3997	DB01330	cefotetan	7e-06	PC3	0.344866	0.17	0.225337
3774		0317956-0000	1e-05	PC3	0.344447	0.15	0.21765
2437	DB00389	carbimazole	2.14e-05	HL60	0.344397	0.08	0.197251
3713	DB11518	flunixin	8.2e-06	PC3	0.343834	0.09	0.203033
5634	DB00712	flurbiprofen	1.64e-05	MCF7	0.343493	0.14	0.215059
388	DB00481	raloxifene	1e-07	HL60	0.343477	0.16	0.221768
3082	DB13399	terguride	1.18e-05	HL60	0.34339	0.06	0.187021
3328	DB13499	cefsulodin	7.2e-06	MCF7	0.343289	0.11	0.210213
5425	DB00863	ranitidine	1.14e-05	MCF7	0.342744	0.13	0.214035
6874		trichostatin A	1e-06	PC3	0.342658	0.14	0.215059
3810	DB08936	chlorcyclizine	1.18e-05	PC3	0.342429	0.15	0.21765
2323	DB00692	phentolamine	1.26e-05	MCF7	0.342385	0.14	0.215059
6868		PF-00562151-00	1e-05	MCF7	0.34166	0.12	0.210647
2835		trichostatin A	1e-07	MCF7	0.341059	0.19	0.235953
5635		thioperamide	9.8e-06	MCF7	0.34083	0.12	0.210647
4320	DB00319	piperacillin	7.4e-06	PC3	0.340225	0.15	0.21765
5491	DB06153	pizotifen	9.4e-06	MCF7	0.340153	0.1	0.207695
4671	DB01407	clenbuterol	1.28e-05	PC3	0.340059	0.15	0.21765
4581	DB00804	dicycloverine	1.16e-05	PC3	0.339509	0.16	0.221768
5691	DB14061	hycanthone	1.12e-05	MCF7	0.339377	0.23	0.26734
5942	DB02656	LY-294002	1e-05	PC3	0.339328	0.14	0.215059
6730	DB01954	rolipram	1.46e-05	PC3	0.338672	0.24	0.277063
2715	DB13642	pridinol	1.02e-05	HL60	0.33862	0.08	0.197251
3049	DB14007	pentetic acid	1.02e-05	HL60	0.338423	0.17	0.225337
4504	DB09156	iopromide	5e-06	PC3	0.338326	0.22	0.258127
5880	DB00623	fluphenazine	7.8e-06	PC3	0.338293	0.11	0.210213
5492	DB00447	loracarbef	1.08e-05	MCF7	0.338191	0.11	0.210213
6440		AG-013608	1e-05	PC3	0.337777	0.14	0.215059
4264	DB04216	quercetin	1.18e-05	PC3	0.336692	0.18	0.230769
6403	DB00580	valdecoxib	1e-05	MCF7	0.336368	0.12	0.210647
5077	DB01017	minocycline	8e-06	PC3	0.336285	0.16	0.221768
3055		thioperamide	9.8e-06	HL60	0.335769	0.15	0.21765
4003	DB00839	tolazamide	1.28e-05	PC3	0.335429	0.2	0.242304
2149	DB13875	harmaline	1.4e-05	HL60	0.33517	0.05	0.180902
4439	DB00433	prochlorperazine	1e-05	PC3	0.334549	0.12	0.210647
2169	DB04843	mepenzolate bromide	9.6e-06	HL60	0.334548	0.06	0.187021
6669	DB12319	benzbromarone	9.4e-06	PC3	0.333883	0.14	0.215059
6545		PHA-00767505E	1e-05	PC3	0.33378	0.12	0.210647
4347	DB04820	nialamide	1.34e-05	MCF7	0.333626	0.12	0.210647
6449	DB01954	rolipram	1.46e-05	MCF7	0.33321	0.11	0.210213
2385	DB14681	cortisone	1.1e-05	HL60	0.333136	0.08	0.197251
6402		3-nitropropionic acid	1e-05	MCF7	0.333031	0.16	0.221768
2993		trichostatin A	1e-07	HL60	0.332841	0.15	0.21765
505	DB05134	tanespimycin	1e-06	SKMEL5	0.332648	0.19	0.235953
4263	DB01087	primaquine	8.8e-06	PC3	0.332555	0.17	0.225337
3073	DB01099	flucytosine	3.1e-05	HL60	0.331975	0.1	0.207695
2531	DB11148	butamben	2.06e-05	HL60	0.331633	0.14	0.215059
4072		trichostatin A	1e-07	PC3	0.330697	0.08	0.197251
4215	DB00943	zalcitabine	1.9e-05	PC3	0.330638	0.12	0.210647
4272	DB00663	flumetasone	9.8e-06	PC3	0.330582	0.17	0.225337
4091	DB01600	tiaprofenic acid	1.54e-05	PC3	0.329743	0.21	0.249951
5053		antimycin A	7.2e-06	PC3	0.329145	0.11	0.210213
7488		BCB000040	1e-05	MCF7	0.329098	0.14	0.215059
5645	DB00373	timolol	9.2e-06	MCF7	0.329041	0.17	0.225337
332		trichostatin A	1e-07	MCF7	0.328932	0.11	0.210213
2989	DB00562	benzthiazide	9.2e-06	HL60	0.328899	0.23	0.26734
2725	DB00748	carbinoxamine	9.8e-06	HL60	0.32843	0.16	0.221768
4684	DB00810	biperiden	1.14e-05	PC3	0.328272	0.16	0.221768
4675		thioperamide	9.8e-06	PC3	0.326113	0.15	0.21765
2796	DB11562	bicuculline	1.08e-05	MCF7	0.326039	0.03	0.165162
446		15-delta prostaglandin J2	1e-05	PC3	0.325913	0.13	0.214035
2442	DB00153	ergocalciferol	1e-05	HL60	0.325301	0.13	0.214035
371	DB00533	rofecoxib	1e-05	HL60	0.325213	0.1	0.207695
3895	DB00255	diethylstilbestrol	1.5e-05	MCF7	0.324887	0.13	0.214035
4465	DB00783	estradiol	1e-08	PC3	0.324848	0.16	0.221768
6421		PF-00539758-00	1e-05	PC3	0.324375	0.09	0.203033
3229	DB14061	hycanthone	1.12e-05	MCF7	0.323667	0.14	0.215059
4309		famprofazone	1.06e-05	PC3	0.323097	0.11	0.210213
3742		etiocholanolone	1.38e-05	PC3	0.322518	0.17	0.225337
4132	DB12604	sisomicin	2.8e-06	MCF7	0.322435	0.1	0.207695
4473	DB00598	labetalol	1.1e-05	PC3	0.322373	0.19	0.235953
5953	DB05134	tanespimycin	1e-06	MCF7	0.322339	0.21	0.249951
5801	DB00532	mephenytoin	1.84e-05	PC3	0.322318	0.19	0.235953
4209	DB02918	zardaverine	1.5e-05	PC3	0.321946	0.21	0.249951
2730	DB01139	cefapirin	9e-06	HL60	0.321902	0.08	0.197251
3114		trichostatin A	1e-07	HL60	0.32153	0.13	0.214035
5441		trichostatin A	1e-07	MCF7	0.321383	0.17	0.225337
5414	DB00181	baclofen	1.88e-05	MCF7	0.321133	0.11	0.210213
3868		trichostatin A	1e-07	MCF7	0.319843	0.18	0.230769
4155	DB00208	ticlopidine	1.34e-05	MCF7	0.319678	0.15	0.21765
4324		acacetin	1.4e-05	PC3	0.319428	0.19	0.235953
4540	DB01124	tolbutamide	1.48e-05	PC3	0.318423	0.14	0.215059
5981		trichostatin A	1e-06	PC3	0.318001	0.2	0.242304
5800		alpha-yohimbine	1.02e-05	PC3	0.317478	0.12	0.210647
5949		AG-013608	1e-05	PC3	0.316462	0.13	0.214035
2255	DB13415	pentetrazol	2.9e-05	MCF7	0.316026	0.1	0.207695
4224	DB01086	benzocaine	2.42e-05	PC3	0.315933	0.18	0.230769
5805	DB01181	ifosfamide	1.54e-05	PC3	0.315758	0.15	0.21765
2153		sulmazole	1.4e-05	HL60	0.315051	0.11	0.210213
374	DB01234	dexamethasone	1e-06	ssMCF7	0.314687	0.21	0.249951
5947		monorden	1e-07	MCF7	0.314645	0.17	0.225337
6040	DB06786	halcinonide	8.8e-06	MCF7	0.314489	0.18	0.230769
4018	DB06803	niclosamide	1.22e-05	PC3	0.313809	0.2	0.242304
4561		CP-690334-01	1e-06	PC3	0.313801	0.14	0.215059
4163	DB00726	trimipramine	9.8e-06	MCF7	0.313067	0.21	0.249951
4438	DB00313	valproic acid	0.0002	PC3	0.312955	0.21	0.249951
3187		clofilium tosylate	7.8e-06	MCF7	0.312596	0.17	0.225337
6884		AG-012559	1e-05	PC3	0.31175	0.16	0.221768
4486		napelline	1.12e-05	PC3	0.310587	0.12	0.210647
4223	DB00646	nystatin	4.4e-06	PC3	0.31049	0.27	0.308023
503	DB00328	indometacin	0.0001	SKMEL5	0.308423	0.14	0.215059
5752	DB00240	alclometasone	7.6e-06	PC3	0.30818	0.15	0.21765
6401		F0447-0125	1e-05	PC3	0.306847	0.18	0.230769
7534	DB00947	fulvestrant	1e-06	MCF7	0.305416	0.18	0.230769
4440	DB02656	LY-294002	1e-07	PC3	0.303961	0.11	0.210213
3896	DB00911	tinidazole	1.62e-05	MCF7	0.30377	0.11	0.210213
4022	DB01053	benzathine benzylpenicillin	4.2e-06	PC3	0.301451	0.19	0.235953
4621	DB13661	niridazole	1.86e-05	PC3	0.301438	0.13	0.214035
6921		H-89	5e-07	PC3	0.30127	0.15	0.21765
6200	DB00783	estradiol	1e-08	HL60	0.30126	0.18	0.230769
3738		benzamil	1.12e-05	PC3	0.301193	0.11	0.210213
4217		digitoxigenin	1.06e-05	PC3	0.301146	0.2	0.242304
6405		PF-01378883-00	1e-05	MCF7	0.300334	0.18	0.230769
3836	DB13442	citiolone	2.52e-05	MCF7	0.299828	0.2	0.242304
4305		solasodine	9.6e-06	PC3	0.299762	0.16	0.221768
3208	DB00195	betaxolol	1.16e-05	MCF7	0.29884	0.12	0.210647
5772	DB00595	oxytetracycline	8e-06	PC3	0.295281	0.18	0.230769
3235	DB01178	chlormezanone	1.46e-05	MCF7	0.294671	0.16	0.221768
2991	DB00387	procyclidine	1.24e-05	HL60	0.293266	0.19	0.235953
2664	DB00945	acetylsalicylic acid	0.0001	HL60	0.292828	0.13	0.214035
4558		CP-690334-01	1e-05	PC3	0.292349	0.19	0.235953
4120	DB00330	ethambutol	1.44e-05	MCF7	0.291451	0.15	0.21765
2666	DB05134	tanespimycin	1e-06	HL60	0.290678	0.15	0.21765
4430	DB05134	tanespimycin	1e-06	PC3	0.290246	0.18	0.230769
6732		N6-methyladenosine	1.42e-05	PC3	0.289559	0.2	0.242304
6415	DB01083	orlistat	1e-05	MCF7	0.289137	0.17	0.225337
5461	DB11636	nomegestrol	1.08e-05	MCF7	0.289119	0.17	0.225337
5903		trichostatin A	1e-06	MCF7	0.28768	0.16	0.221768
3779	DB00692	phentolamine	1.26e-05	PC3	0.28678	0.18	0.230769
5922		PF-00562151-00	1e-05	PC3	0.286587	0.16	0.221768
4230	DB00805	minaprine	1.08e-05	PC3	0.284784	0.11	0.210213
3698	DB00226	guanadrel	7.6e-06	PC3	0.283556	0.22	0.258127
4102	DB00469	tenoxicam	1.18e-05	PC3	0.283203	0.14	0.215059
5101	DB00860	prednisolone	1.1e-05	PC3	0.282726	0.12	0.210647
5731	DB01170	guanethidine	1.34e-05	PC3	0.281908	0.14	0.215059
5952		monorden	1e-07	PC3	0.281307	0.23	0.26734
6697	DB00392	profenamine	1.14e-05	PC3	0.281081	0.18	0.230769
5791	DB01622	thioproperazine	6.2e-06	PC3	0.280629	0.14	0.215059
4622		N-acetyl-L-leucine	2.3e-05	PC3	0.280482	0.17	0.225337
4276		Prestwick-674	1.44e-05	PC3	0.277545	0.2	0.242304
5975	DB00877	sirolimus	1e-07	MCF7	0.276795	0.12	0.210647
6689	DB00121	biotin	1.64e-05	PC3	0.276089	0.14	0.215059
484		monorden	1e-07	PC3	0.276034	0.19	0.235953
4318	DB01195	flecainide	8.4e-06	PC3	0.274717	0.18	0.230769
5781	DB00421	spironolactone	9.6e-06	PC3	0.273752	0.14	0.215059
4310	DB04817	metamizole sodium	1.2e-05	PC3	0.269463	0.14	0.215059
5680	DB00867	ritodrine	1.24e-05	MCF7	0.267598	0.14	0.215059
5943	DB11457	rotenone	1e-06	MCF7	0.266497	0.19	0.235953
4196	DB12867	benperidol	1.04e-05	PC3	0.264976	0.22	0.258127
5598	DB00947	fulvestrant	1e-08	MCF7	0.263037	0.13	0.214035
6738	DB13670	oxantel	6.6e-06	PC3	0.26176	0.16	0.221768
3168	DB01062	oxybutynin	1.02e-05	MCF7	0.260097	0.16	0.221768
346	DB00313	valproic acid	0.002	MCF7	0.258692	0.27	0.308023
3743	DB01146	diphenylpyraline	1.26e-05	PC3	0.253008	0.17	0.225337
6052	DB00754	ethotoin	1.96e-05	MCF7	0.252186	0.14	0.215059
4258	DB13510	buflomedil	1.16e-05	PC3	0.248627	0.23	0.26734
6416		PF-00539758-00	1e-05	MCF7	0.232015	0.23	0.26734
2	DB00331	metformin	1e-05	MCF7	0	0.15	0.21765
3	DB00331	metformin	1e-07	MCF7	0	0.12	0.210647
4	DB00331	metformin	0.001	MCF7	0	0.19	0.235953
21	DB00914	phenformin	1e-05	MCF7	0	0.14	0.215059
22		phenyl biguanide	1e-05	MCF7	0	0.15	0.21765
23	DB00313	valproic acid	0.001	MCF7	0	0.17	0.225337
61	DB00331	metformin	1e-05	MCF7	0	0.14	0.215059
121	DB00783	estradiol	1e-08	MCF7	0	0.04	0.173665
122		alpha-estradiol	1e-08	MCF7	0	0.08	0.197251
123	DB01234	dexamethasone	1e-06	MCF7	0	0.06	0.187021
124	DB00244	mesalazine	0.0001	MCF7	0	0.03	0.165162
141	DB00672	chlorpropamide	0.0001	MCF7	0	0.04	0.173665
142	DB01124	tolbutamide	0.0001	MCF7	0	0.04	0.173665
143	DB00675	tamoxifen	1e-06	MCF7	0	0.07	0.193563
144	DB00672	chlorpropamide	0.0001	MCF7	0	0.07	0.193563
161	DB00661	verapamil	1e-05	MCF7	0	0.01	0.122984
164	DB14063	dexverapamil	1e-05	MCF7	0	0.02	0.148418
165	DB00990	exemestane	1e-08	MCF7	0	0.02	0.148418
166	DB00533	rofecoxib	1e-05	MCF7	0	0.01	0.122984
167	DB00321	amitriptyline	1e-06	MCF7	0	0.19	0.235953
168	DB00605	sulindac	0.0001	MCF7	0	0.07	0.193563
169	DB00864	tacrolimus	1e-06	MCF7	0	0.13	0.214035
201		15-delta prostaglandin J2	1e-05	MCF7	0	0.13	0.214035
202	DB00481	raloxifene	1e-07	MCF7	0	0.04	0.173665
203	DB00179	nordihydroguaiaretic acid	1e-06	MCF7	0	0.12	0.210647
204	DB00795	sulfasalazine	0.0001	MCF7	0	0.1	0.207695
206	DB00482	celecoxib	1e-05	MCF7	0	0.16	0.221768
222		tomelukast	1e-06	MCF7	0	0.22	0.258127
254		SC-58125	1e-05	MCF7	0	0.28	0.318776
261	DB00091	ciclosporin	1e-06	MCF7	0	0.25	0.287356
263	DB00636	clofibrate	0.00015	MCF7	0	0.23	0.26734
265	DB00860	prednisolone	1e-06	MCF7	0	0.22	0.258127
266	DB01041	thalidomide	0.0001	MCF7	0	0.22	0.258127
267	DB01645	genistein	1e-06	MCF7	0	0.21	0.249951
268	DB01645	genistein	1e-06	MCF7	0	0.26	0.297394
283	DB04216	quercetin	1e-06	MCF7	0	0.17	0.225337
308		sulindac sulfide	5e-05	MCF7	0	0.14	0.215059
309	DB06246	exisulind	5e-05	MCF7	0	0.15	0.21765
310	DB00947	fulvestrant	1e-08	MCF7	0	0.11	0.210213
311	DB04331	monastrol	0.0001	MCF7	0	0.25	0.287356
312	DB02010	staurosporine	1e-06	MCF7	0	0.27	0.308023
313		NU-1025	0.0001	MCF7	0	0.19	0.235953
314	DB06246	exisulind	5e-05	MCF7	0	0.26	0.297394
315	DB00945	acetylsalicylic acid	0.0001	MCF7	0	0.23	0.26734
316	DB02266	flufenamic acid	1e-05	MCF7	0	0.27	0.308023
317		N-phenylanthranilic acid	1e-05	MCF7	0	0.13	0.214035
318	DB02656	LY-294002	1e-05	MCF7	0	0.18	0.230769
325		monorden	1e-07	MCF7	0	0.12	0.210647
327		arachidonyltrifluoromethane	1e-05	MCF7	0	0.12	0.210647
333	DB00586	diclofenac	1e-05	MCF7	0	0.14	0.215059
334	DB01033	mercaptopurine	0.0001	MCF7	0	0.17	0.225337
336	DB01054	nitrendipine	1e-05	MCF7	0	0.28	0.318776
337	DB01023	felodipine	1e-05	MCF7	0	0.28	0.318776
338	DB00993	azathioprine	0.0001	MCF7	0	0.19	0.235953
342	DB01051	novobiocin	0.0001	MCF7	0	0.19	0.235953
343	DB08162	fasudil	1e-05	MCF7	0	0.15	0.21765
362	DB00877	sirolimus	1e-07	HL60	0	0.17	0.225337
363	DB06819	sodium phenylbutyrate	0.0001	HL60	0	0.13	0.214035
365	DB00783	estradiol	1e-07	MCF7	0	0.22	0.258127
366	DB00619	imatinib	1e-05	MCF7	0	0.24	0.277063
367	DB00947	fulvestrant	1e-06	MCF7	0	0.13	0.214035
368		pirinixic acid	0.0001	MCF7	0	0.13	0.214035
369	DB00412	rosiglitazone	1e-05	HL60	0	0.04	0.173665
373	DB00783	estradiol	1e-08	ssMCF7	0	0.16	0.221768
375	DB00675	tamoxifen	1e-06	ssMCF7	0	0.15	0.21765
376	DB00481	raloxifene	1e-07	ssMCF7	0	0.17	0.225337
377	DB00482	celecoxib	1e-05	MCF7	0	0.12	0.210647
378	DB00864	tacrolimus	1e-06	MCF7	0	0.08	0.197251
379	DB14206	cobalt chloride	0.0001	MCF7	0	0.17	0.225337
380	DB00675	tamoxifen	1e-06	MCF7	0	0.13	0.214035
382	DB01645	genistein	1e-05	MCF7	0	0.15	0.21765
384	DB00755	tretinoin	1e-06	MCF7	0	0.17	0.225337
387	DB00783	estradiol	1e-08	HL60	0	0.15	0.21765
389	DB08059	wortmannin	1e-08	HL60	0	0.14	0.215059
390	DB00755	tretinoin	1e-06	HL60	0	0.12	0.210647
401	DB02656	LY-294002	1e-05	ssMCF7	0	0.31	0.352207
403		alpha-estradiol	1e-08	ssMCF7	0	0.21	0.249951
404	DB08059	wortmannin	1e-08	ssMCF7	0	0.19	0.235953
405		tetraethylenepentamine	1e-05	MCF7	0	0.19	0.235953
407	DB06819	sodium phenylbutyrate	0.001	MCF7	0	0.19	0.235953
409	DB00313	valproic acid	0.001	HL60	0	0.14	0.215059
412		tetraethylenepentamine	0.0001	HL60	0	0.08	0.197251
413		trichostatin A	1e-07	ssMCF7	0	0.2	0.242304
414	DB00783	estradiol	1e-08	ssMCF7	0	0.22	0.258127
415	DB00179	nordihydroguaiaretic acid	1e-06	ssMCF7	0	0.15	0.21765
416	DB00363	clozapine	1e-05	MCF7	0	0.14	0.215059
417	DB00679	thioridazine	1e-05	MCF7	0	0.1	0.207695
418	DB00502	haloperidol	1e-05	MCF7	0	0.13	0.214035
419	DB00477	chlorpromazine	1e-05	MCF7	0	0.09	0.203033
423	DB02010	staurosporine	1e-07	MCF7	0	0.08	0.197251
425	DB02010	staurosporine	1e-08	MCF7	0	0.08	0.197251
427	DB01088	iloprost	1e-06	MCF7	0	0.07	0.193563
428	DB05134	tanespimycin	1e-06	MCF7	0	0.08	0.197251
429	DB02656	LY-294002	1e-05	PC3	0	0.11	0.210213
431	DB00197	troglitazone	1e-05	PC3	0	0.11	0.210213
433	DB00313	valproic acid	0.001	PC3	0	0.22	0.258127
434	DB06819	sodium phenylbutyrate	0.001	PC3	0	0.27	0.308023
435	DB01051	novobiocin	0.0001	PC3	0	0.2	0.242304
436	DB08162	fasudil	1e-05	PC3	0	0.19	0.235953
437	DB01051	novobiocin	0.0001	MCF7	0	0.14	0.215059
443	DB04557	arachidonic acid	1e-05	MCF7	0	0.09	0.203033
444	DB00636	clofibrate	0.0001	MCF7	0	0.11	0.210213
445	DB00586	diclofenac	1e-05	PC3	0	0.16	0.221768
447	DB00755	tretinoin	1e-06	PC3	0	0.11	0.210213
452	DB00328	indometacin	0.0001	PC3	0	0.15	0.21765
453	DB00328	indometacin	0.0001	MCF7	0	0.09	0.203033
456		quinpirole	1e-06	MCF7	0	0.16	0.221768
457		tetraethylenepentamine	0.0001	PC3	0	0.06	0.187021
458	DB00313	valproic acid	0.001	PC3	0	0.06	0.187021
459	DB06778	copper sulfate	0.0001	PC3	0	0.05	0.180902
460	DB00746	deferoxamine	0.0001	PC3	0	0.05	0.180902
463	DB00533	rofecoxib	1e-05	PC3	0	0.14	0.215059
485	DB00746	deferoxamine	0.0001	MCF7	0	0.1	0.207695
489		monorden	1e-07	MCF7	0	0.07	0.193563
490	DB00623	fluphenazine	1e-05	MCF7	0	0.14	0.215059
491	DB00988	dopamine	1e-06	MCF7	0	0.15	0.21765
493		monorden	1e-07	SKMEL5	0	0.19	0.235953
496	DB01088	iloprost	1e-06	SKMEL5	0	0.2	0.242304
499	DB01051	novobiocin	0.0001	ssMCF7	0	0.14	0.215059
500	DB06778	copper sulfate	0.0001	ssMCF7	0	0.18	0.230769
501	DB02656	LY-294002	1e-05	SKMEL5	0	0.18	0.230769
504	DB00197	troglitazone	1e-05	SKMEL5	0	0.23	0.26734
506	DB08059	wortmannin	1e-08	SKMEL5	0	0.15	0.21765
508	DB02010	staurosporine	1e-08	SKMEL5	0	0.18	0.230769
521	DB05134	tanespimycin	1e-06	ssMCF7	0	0.12	0.210647
523	DB00947	fulvestrant	1e-06	ssMCF7	0	0.09	0.203033
524	DB00179	nordihydroguaiaretic acid	1e-06	ssMCF7	0	0.07	0.193563
542		SC-58125	1e-05	HL60	0	0.08	0.197251
544		monorden	1e-07	HL60	0	0.09	0.203033
564		15-delta prostaglandin J2	1e-05	SKMEL5	0	0.05	0.180902
574		tetraethylenepentamine	0.0001	MCF7	0	0.17	0.225337
575	DB06778	copper sulfate	0.0001	MCF7	0	0.2	0.242304
576	DB01051	novobiocin	0.0001	MCF7	0	0.15	0.21765
578		4,5-dianilinophthalimide	1e-05	PC3	0	0	0
579	DB07795	fisetin	5e-05	PC3	0	0	0
582		butein	1e-05	PC3	0	0.12	0.210647
583		HNMPA-(AM)3	5e-06	PC3	0	0.22	0.258127
584		dimethyloxalylglycine	0.001	PC3	0	0.18	0.230769
590		3-aminobenzamide	0.01	MCF7	0	0.03	0.165162
591	DB13242	bucladesine	2e-05	MCF7	0	0.05	0.180902
593	DB02424	geldanamycin	1e-06	MCF7	0	0.1	0.207695
594		arachidonyltrifluoromethane	1e-05	MCF7	0	0.11	0.210213
596	DB04331	monastrol	0.0001	MCF7	0	0.09	0.203033
601		MK-886	1e-06	MCF7	0	0.12	0.210647
602	DB00091	ciclosporin	1e-06	MCF7	0	0.07	0.193563
603	DB01115	nifedipine	1e-05	MCF7	0	0.18	0.230769
604	DB04557	arachidonic acid	1e-05	MCF7	0	0.1	0.207695
606	DB01041	thalidomide	0.0001	MCF7	0	0.2	0.242304
609		5666823	0.0001	MCF7	0	0.07	0.193563
611	DB02424	geldanamycin	1e-06	MCF7	0	0.07	0.193563
612		LM-1685	1e-05	MCF7	0	0.17	0.225337
614	DB04331	monastrol	2e-05	MCF7	0	0	0
621	DB08313	nocodazole	1e-06	MCF7	0	0.02	0.148418
622	DB02709	resveratrol	5e-05	MCF7	0	0	0
624		4,5-dianilinophthalimide	1e-05	MCF7	0	0	0
627	DB04331	monastrol	0.0001	MCF7	0	0	0
629	DB00313	valproic acid	0.001	SKMEL5	0	0.02	0.148418
630	DB01394	colchicine	1e-06	SKMEL5	0	0.02	0.148418
631	DB12783	benserazide	1e-05	SKMEL5	0	0	0
632	DB01051	novobiocin	0.0001	SKMEL5	0	0.02	0.148418
638	DB01645	genistein	1e-05	MCF7	0	0.12	0.210647
639	DB00738	pentamidine	0.0001	MCF7	0	0.1	0.207695
640	DB01229	paclitaxel	1e-07	MCF7	0	0.1	0.207695
641	DB12783	benserazide	1e-05	MCF7	0	0.06	0.187021
642	DB00352	tioguanine	1e-05	MCF7	0	0.12	0.210647
643		W-13	1e-05	MCF7	0	0.12	0.210647
644	DB01394	colchicine	1e-07	MCF7	0	0.16	0.221768
661		splitomicin	2e-05	PC3	0	0.09	0.203033
662	DB02709	resveratrol	5e-05	PC3	0	0.07	0.193563
665	DB00783	estradiol	1e-08	PC3	0	0.12	0.210647
666		butirosin	1e-05	PC3	0	0.09	0.203033
667	DB01033	mercaptopurine	1e-05	PC3	0	0.07	0.193563
668	DB04331	monastrol	0.0001	PC3	0	0.1	0.207695
681	DB04331	monastrol	0.0001	MCF7	0	0.04	0.173665
702		alpha-estradiol	1e-08	PC3	0	0.04	0.173665
703	DB01645	genistein	1e-05	PC3	0	0.02	0.148418
704	DB00947	fulvestrant	1e-06	PC3	0	0.02	0.148418
762		alpha-estradiol	1e-08	MCF7	0	0.02	0.148418
782	DB00783	estradiol	1e-08	HL60	0	0	0
783	DB02587	colforsin	5e-05	HL60	0	0	0
825		rottlerin	1e-05	MCF7	0	0.02	0.148418
826	DB00457	prazosin	1e-05	MCF7	0	0.01	0.122984
828		5252917	1.4e-05	MCF7	0	0.01	0.122984
831	DB05134	tanespimycin	1e-06	MCF7	0	0.05	0.180902
832		Y-27632	3e-06	MCF7	0	0.01	0.122984
833		5255229	1.3e-05	MCF7	0	0.01	0.122984
834		5211181	1.2e-05	MCF7	0	0.04	0.173665
835	DB00564	carbamazepine	1e-07	MCF7	0	0.04	0.173665
836		monorden	1e-07	MCF7	0	0.02	0.148418
837		blebbistatin	1.7e-05	MCF7	0	0.01	0.122984
838		5248896	1.1e-05	MCF7	0	0.03	0.165162
839		5224221	1.2e-05	MCF7	0	0.03	0.165162
841	DB02709	resveratrol	1e-05	MCF7	0	0.04	0.173665
842	DB13242	bucladesine	2e-06	MCF7	0	0.02	0.148418
843		5279552	2.2e-05	MCF7	0	0.05	0.180902
844		5253409	1.7e-05	MCF7	0	0.09	0.203033
848	DB01023	felodipine	1e-05	MCF7	0	0.01	0.122984
849	DB00755	tretinoin	1e-06	MCF7	0	0.04	0.173665
862		5230742	1.7e-05	MCF7	0	0.01	0.122984
863	DB00991	oxaprozin	0.0003	MCF7	0	0.04	0.173665
864	DB02424	geldanamycin	1e-06	MCF7	0	0.03	0.165162
865		quinostatin	1e-05	MCF7	0	0.08	0.197251
866		ikarugamycin	2e-06	MCF7	0	0.04	0.173665
868		5182598	2.5e-05	MCF7	0	0.02	0.148418
869	DB08059	wortmannin	1e-06	MCF7	0	0.09	0.203033
870	DB06816	pyrvinium	1.25e-06	MCF7	0	0.07	0.193563
871		ionomycin	2e-06	MCF7	0	0.06	0.187021
873		trichostatin A	1e-06	MCF7	0	0.06	0.187021
874		depudecin	1e-06	MCF7	0	0.06	0.187021
881		docosahexaenoic acid ethyl ester	0.0001	MCF7	0	0.03	0.165162
882		ionomycin	2e-06	MCF7	0	0.08	0.197251
885		5186223	1.2e-05	MCF7	0	0.02	0.148418
887		celastrol	2.5e-06	MCF7	0	0.02	0.148418
889		5286656	5e-05	MCF7	0	0.01	0.122984
890		5149715	1e-05	MCF7	0	0.02	0.148418
892		5162773	7e-06	MCF7	0	0.01	0.122984
893		pararosaniline	1e-05	MCF7	0	0.01	0.122984
896		5152487	1e-05	MCF7	0	0.02	0.148418
898		5213008	1.8e-05	MCF7	0	0.04	0.173665
900		5186324	2e-06	MCF7	0	0	0
901		5114445	1e-05	MCF7	0	0.06	0.187021
903		5151277	1.4e-05	MCF7	0	0.04	0.173665
904		5109870	2.5e-05	MCF7	0	0.04	0.173665
905	DB00257	clotrimazole	5e-05	MCF7	0	0.01	0.122984
906		calmidazolium	5e-06	MCF7	0	0.05	0.180902
908		5140203	1.5e-05	MCF7	0	0.03	0.165162
909		HC toxin	1e-07	MCF7	0	0.04	0.173665
910	DB00831	trifluoperazine	1e-05	MCF7	0	0	0
911	DB08059	wortmannin	1e-08	MCF7	0	0.03	0.165162
913	DB02587	colforsin	5e-05	MCF7	0	0.02	0.148418
914		rottlerin	1e-05	MCF7	0	0.03	0.165162
915	DB00273	topiramate	3e-06	MCF7	0	0.05	0.180902
916	DB05134	tanespimycin	1e-06	MCF7	0	0.02	0.148418
917	DB04216	quercetin	1e-06	MCF7	0	0.04	0.173665
918		ikarugamycin	2e-06	MCF7	0	0.05	0.180902
919	DB00564	carbamazepine	1e-07	MCF7	0	0.03	0.165162
920	DB01262	decitabine	1e-07	MCF7	0	0.06	0.187021
921	DB00877	sirolimus	1e-07	MCF7	0	0.06	0.187021
922	DB00482	celecoxib	1e-05	MCF7	0	0.04	0.173665
941		rottlerin	1e-05	MCF7	0	0.01	0.122984
942	DB00457	prazosin	1e-05	MCF7	0	0.05	0.180902
944		5252917	1.4e-05	MCF7	0	0.01	0.122984
947	DB05134	tanespimycin	1e-06	MCF7	0	0.02	0.148418
948		Y-27632	3e-06	MCF7	0	0.03	0.165162
949		5255229	1.3e-05	MCF7	0	0.02	0.148418
950		5211181	1.2e-05	MCF7	0	0.01	0.122984
952	DB00564	carbamazepine	1e-07	MCF7	0	0	0
953		monorden	1e-07	MCF7	0	0.04	0.173665
954		blebbistatin	1.7e-05	MCF7	0	0.02	0.148418
955		5248896	1.1e-05	MCF7	0	0.01	0.122984
956		5224221	1.2e-05	MCF7	0	0.03	0.165162
958	DB02709	resveratrol	1e-05	MCF7	0	0	0
959	DB13242	bucladesine	2e-06	MCF7	0	0	0
960		5279552	2.2e-05	MCF7	0	0.03	0.165162
961		5253409	1.7e-05	MCF7	0	0.02	0.148418
965	DB01023	felodipine	1e-05	MCF7	0	0.01	0.122984
966	DB00755	tretinoin	1e-06	MCF7	0	0.01	0.122984
970		5230742	1.7e-05	MCF7	0	0.03	0.165162
971	DB00991	oxaprozin	0.0003	MCF7	0	0.01	0.122984
972	DB02424	geldanamycin	1e-06	MCF7	0	0.03	0.165162
973		quinostatin	1e-05	MCF7	0	0.04	0.173665
974		ikarugamycin	2e-06	MCF7	0	0.02	0.148418
976		5182598	2.5e-05	MCF7	0	0.01	0.122984
977	DB08059	wortmannin	1e-06	MCF7	0	0.02	0.148418
978	DB06816	pyrvinium	1.25e-06	MCF7	0	0.06	0.187021
979		ionomycin	2e-06	MCF7	0	0.04	0.173665
981		trichostatin A	1e-06	MCF7	0	0.06	0.187021
982		depudecin	1e-06	MCF7	0	0.01	0.122984
984	DB00945	acetylsalicylic acid	0.0001	MCF7	0	0.04	0.173665
985	DB00947	fulvestrant	1e-06	MCF7	0	0.01	0.122984
986	DB05134	tanespimycin	1e-06	MCF7	0	0.03	0.165162
987	DB00877	sirolimus	1e-07	MCF7	0	0.07	0.193563
988	DB00783	estradiol	1e-07	MCF7	0	0.04	0.173665
989	DB00313	valproic acid	0.001	MCF7	0	0.03	0.165162
990		alpha-estradiol	1e-08	MCF7	0	0.01	0.122984
991	DB00755	tretinoin	1e-06	MCF7	0	0.01	0.122984
992		trichostatin A	1e-07	MCF7	0	0.03	0.165162
994	DB00313	valproic acid	0.0002	MCF7	0	0.03	0.165162
995	DB00433	prochlorperazine	1e-05	MCF7	0	0.04	0.173665
996	DB02656	LY-294002	1e-07	MCF7	0	0.02	0.148418
997	DB00477	chlorpromazine	1e-06	MCF7	0	0.01	0.122984
998	DB05134	tanespimycin	1e-06	MCF7	0	0.04	0.173665
999		monorden	1e-07	MCF7	0	0.06	0.187021
1000	DB02546	vorinostat	1e-05	MCF7	0	0.04	0.173665
1001	DB00877	sirolimus	1e-07	MCF7	0	0	0
1002	DB00313	valproic acid	5e-05	MCF7	0	0.04	0.173665
1003	DB00179	nordihydroguaiaretic acid	1e-06	MCF7	0	0.05	0.180902
1004	DB00831	trifluoperazine	1e-05	MCF7	0	0.02	0.148418
1006	DB05134	tanespimycin	1e-06	MCF7	0	0	0
1007	DB02656	LY-294002	1e-05	MCF7	0	0.01	0.122984
1008	DB02424	geldanamycin	1e-06	MCF7	0	0.03	0.165162
1009	DB00363	clozapine	1e-05	MCF7	0	0.02	0.148418
1010	DB00679	thioridazine	1e-05	MCF7	0	0.03	0.165162
1011		15-delta prostaglandin J2	1e-05	MCF7	0	0.02	0.148418
1012	DB00197	troglitazone	1e-05	MCF7	0	0.06	0.187021
1013	DB00412	rosiglitazone	1e-05	MCF7	0	0	0
1015	DB01645	genistein	1e-05	MCF7	0	0.05	0.180902
1016	DB02656	LY-294002	1e-05	MCF7	0	0.05	0.180902
1017	DB00623	fluphenazine	1e-05	MCF7	0	0.02	0.148418
1019	DB02656	LY-294002	1e-05	MCF7	0	0.02	0.148418
1020	DB00313	valproic acid	0.0005	MCF7	0	0.02	0.148418
1021	DB00783	estradiol	1e-08	MCF7	0	0.05	0.180902
1022	DB00877	sirolimus	1e-07	MCF7	0	0.09	0.203033
1023	DB08059	wortmannin	1e-08	MCF7	0	0.05	0.180902
1024	DB00502	haloperidol	1e-05	MCF7	0	0.04	0.173665
1041	DB00502	haloperidol	1e-05	MCF7	0	0	0
1042	DB00945	acetylsalicylic acid	0.0001	MCF7	0	0	0
1043	DB00947	fulvestrant	1e-06	MCF7	0	0	0
1044	DB05134	tanespimycin	1e-06	MCF7	0	0	0
1045	DB00877	sirolimus	1e-07	MCF7	0	0	0
1047	DB00313	valproic acid	0.001	MCF7	0	0	0
1048		alpha-estradiol	1e-08	MCF7	0	0	0
1049	DB00755	tretinoin	1e-06	MCF7	0	0.01	0.122984
1050		trichostatin A	1e-07	MCF7	0	0	0
1051	DB12442	alvespimycin	1e-07	MCF7	0	0	0
1053	DB00433	prochlorperazine	1e-05	MCF7	0	0	0
1054	DB02656	LY-294002	1e-07	MCF7	0	0	0
1055	DB00477	chlorpromazine	1e-06	MCF7	0	0	0
1056	DB05134	tanespimycin	1e-06	MCF7	0	0	0
1057		monorden	1e-07	MCF7	0	0	0
1058	DB02546	vorinostat	1e-05	MCF7	0	0.01	0.122984
1059	DB00877	sirolimus	1e-07	MCF7	0	0	0
1060	DB00313	valproic acid	5e-05	MCF7	0	0	0
1061	DB00179	nordihydroguaiaretic acid	1e-06	MCF7	0	0	0
1063	DB05134	tanespimycin	1e-06	MCF7	0	0.01	0.122984
1064	DB05134	tanespimycin	1e-06	MCF7	0	0	0
1065	DB02656	LY-294002	1e-05	MCF7	0	0	0
1066	DB02424	geldanamycin	1e-06	MCF7	0	0.01	0.122984
1068	DB00679	thioridazine	1e-05	MCF7	0	0.01	0.122984
1069		15-delta prostaglandin J2	1e-05	MCF7	0	0.02	0.148418
1070	DB00197	troglitazone	1e-05	MCF7	0	0.01	0.122984
1071	DB00412	rosiglitazone	1e-05	MCF7	0	0.01	0.122984
1072		trichostatin A	1e-06	MCF7	0	0	0
1073	DB01645	genistein	1e-05	MCF7	0	0.03	0.165162
1074	DB02656	LY-294002	1e-05	MCF7	0	0.01	0.122984
1075	DB00623	fluphenazine	1e-05	MCF7	0	0.01	0.122984
1076	DB00947	fulvestrant	1e-08	MCF7	0	0.01	0.122984
1077	DB02656	LY-294002	1e-05	MCF7	0	0	0
1078	DB00313	valproic acid	0.0005	MCF7	0	0.02	0.148418
1079	DB00783	estradiol	1e-08	MCF7	0	0.01	0.122984
1080	DB00877	sirolimus	1e-07	MCF7	0	0.01	0.122984
1081	DB08059	wortmannin	1e-08	MCF7	0	0.03	0.165162
1082	DB00502	haloperidol	1e-05	MCF7	0	0.03	0.165162
1101		(-)-catechin	1.1e-05	MCF7	0	0	0
1103	DB13318	demecolcine	1.17e-05	MCF7	0	0.01	0.122984
1105	DB11430	monensin	1.09e-05	MCF7	0	0	0
1108		12,13-EODE	2e-07	MCF7	0	0	0
1109		3-hydroxy-DL-kynurenine	9.2e-06	MCF7	0	0	0
1112		trichostatin A	1e-07	MCF7	0	0	0
1113	DB00254	doxycycline	1.44e-05	MCF7	0	0.01	0.122984
1114		tyrphostin AG-825	2.52e-05	MCF7	0	0	0
1115		phenanthridinone	5.12e-05	MCF7	0	0.01	0.122984
1119	DB01392	yohimbine	2.29e-05	MCF7	0	0.02	0.148418
1121		DL-PPMP	2e-06	MCF7	0	0	0
1122		cytochalasin B	2.08e-05	MCF7	0	0.01	0.122984
1132		BW-B70C	3.16e-05	MCF7	0	0	0
1135	DB01017	minocycline	1.05e-05	MCF7	0	0.01	0.122984
1138	DB00692	phentolamine	1.15e-05	MCF7	0	0.01	0.122984
1140		MG-132	2.1e-05	MCF7	0	0	0
1141		tyrphostin AG-1478	3.16e-05	MCF7	0	0	0
1146	DB00947	fulvestrant	1e-06	HL60	0	0	0
1147	DB05134	tanespimycin	1e-06	HL60	0	0	0
1151		alpha-estradiol	1e-08	HL60	0	0.02	0.148418
1153		trichostatin A	1e-07	HL60	0	0	0
1155	DB00313	valproic acid	0.0002	HL60	0	0.03	0.165162
1156	DB00433	prochlorperazine	1e-05	HL60	0	0.01	0.122984
1157	DB02656	LY-294002	1e-07	HL60	0	0.02	0.148418
1158	DB00477	chlorpromazine	1e-06	HL60	0	0	0
1161	DB02546	vorinostat	1e-05	HL60	0	0.07	0.193563
1163	DB00313	valproic acid	5e-05	HL60	0	0.02	0.148418
1168	DB02656	LY-294002	1e-05	HL60	0	0	0
1169	DB02424	geldanamycin	1e-06	HL60	0	0	0
1172		15-delta prostaglandin J2	1e-05	HL60	0	0.04	0.173665
1173	DB00197	troglitazone	1e-05	HL60	0	0.04	0.173665
1175		trichostatin A	1e-06	HL60	0	0.07	0.193563
1177	DB02656	LY-294002	1e-05	HL60	0	0.07	0.193563
1179	DB00947	fulvestrant	1e-08	HL60	0	0.12	0.210647
1181	DB00313	valproic acid	0.0005	HL60	0	0.04	0.173665
1184	DB08059	wortmannin	1e-08	HL60	0	0.01	0.122984
1203	DB00502	haloperidol	1e-05	PC3	0	0.03	0.165162
1204	DB00945	acetylsalicylic acid	0.0001	PC3	0	0.07	0.193563
1206	DB05134	tanespimycin	1e-06	PC3	0	0.07	0.193563
1207	DB00877	sirolimus	1e-07	PC3	0	0.09	0.203033
1208	DB00783	estradiol	1e-07	PC3	0	0.06	0.187021
1210		alpha-estradiol	1e-08	PC3	0	0.05	0.180902
1211	DB00755	tretinoin	1e-06	PC3	0	0.06	0.187021
1213	DB12442	alvespimycin	1e-07	PC3	0	0.03	0.165162
1214	DB00313	valproic acid	0.0002	PC3	0	0.08	0.197251
1215	DB00433	prochlorperazine	1e-05	PC3	0	0.03	0.165162
1216	DB02656	LY-294002	1e-07	PC3	0	0.04	0.173665
1217	DB00477	chlorpromazine	1e-06	PC3	0	0.06	0.187021
1218	DB05134	tanespimycin	1e-06	PC3	0	0.08	0.197251
1219		monorden	1e-07	PC3	0	0.06	0.187021
1220	DB02546	vorinostat	1e-05	PC3	0	0.04	0.173665
1221	DB00877	sirolimus	1e-07	PC3	0	0.08	0.197251
1222	DB00313	valproic acid	5e-05	PC3	0	0.1	0.207695
1223	DB00179	nordihydroguaiaretic acid	1e-06	PC3	0	0.05	0.180902
1224	DB00831	trifluoperazine	1e-05	PC3	0	0.1	0.207695
1225	DB05134	tanespimycin	1e-06	PC3	0	0.08	0.197251
1226	DB05134	tanespimycin	1e-06	PC3	0	0.04	0.173665
1227	DB02656	LY-294002	1e-05	PC3	0	0.03	0.165162
1235	DB01645	genistein	1e-05	PC3	0	0.09	0.203033
1236	DB02656	LY-294002	1e-05	PC3	0	0.08	0.197251
1237	DB00623	fluphenazine	1e-05	PC3	0	0.11	0.210213
1238	DB00947	fulvestrant	1e-08	PC3	0	0.06	0.187021
1239	DB02656	LY-294002	1e-05	PC3	0	0.11	0.210213
1242	DB00877	sirolimus	1e-07	PC3	0	0.02	0.148418
1263	DB01035	procainamide	1.48e-05	HL60	0	0.04	0.173665
1264		thioguanosine	1.26e-05	HL60	0	0	0
1266	DB09022	benfluorex	1.04e-05	HL60	0	0	0
1268	DB11186	pentoxyverine	7.6e-06	HL60	0	0.01	0.122984
1269	DB00882	clomifene	6.6e-06	HL60	0	0.01	0.122984
1270		zoxazolamine	2.38e-05	HL60	0	0.03	0.165162
1271		N6-methyladenosine	1.42e-05	HL60	0	0.02	0.148418
1272	DB01239	chlorprothixene	1.14e-05	HL60	0	0.02	0.148418
1273	DB00567	cefalexin	1.1e-05	HL60	0	0.05	0.180902
1275	DB01393	bezafibrate	1.1e-05	HL60	0	0.02	0.148418
1276	DB04209	dequalinium chloride	7.6e-06	HL60	0	0	0
1277	DB13670	oxantel	6.6e-06	HL60	0	0.01	0.122984
1278	DB00382	tacrine	1.58e-05	HL60	0	0.04	0.173665
1279	DB01018	guanfacine	1.42e-05	HL60	0	0.02	0.148418
1281	DB00514	dextromethorphan	1.08e-05	HL60	0	0.01	0.122984
1282	DB00490	buspirone	9.4e-06	HL60	0	0	0
1286	DB00433	prochlorperazine	6.6e-06	HL60	0	0.02	0.148418
1287	DB00612	bisoprolol	9e-06	HL60	0	0.01	0.122984
1288	DB00875	flupentixol	7.8e-06	HL60	0	0	0
1291	DB12319	benzbromarone	9.4e-06	HL60	0	0.03	0.165162
1292	DB13511	clebopride	8.2e-06	HL60	0	0.03	0.165162
1293	DB02703	fusidic acid	7.4e-06	HL60	0	0.02	0.148418
1295	DB00624	testosterone	1.16e-05	HL60	0	0.02	0.148418
1296		androsterone	1.38e-05	HL60	0	0.01	0.122984
1298		coralyne	9.6e-06	HL60	0	0.02	0.148418
1299	DB00783	estradiol	1.46e-05	HL60	0	0.02	0.148418
1301	DB01184	domperidone	7.4e-06	HL60	0	0.04	0.173665
1302	DB01092	ouabain	5.4e-06	HL60	0	0.01	0.122984
1303	DB04365	arecoline	1.7e-05	HL60	0	0.02	0.148418
1304	DB07374	anisomycin	1.5e-05	HL60	0	0.01	0.122984
1305		carcinine	2.2e-05	HL60	0	0	0
1307	DB04652	corticosterone	1.16e-05	HL60	0	0.01	0.122984
1308		fusaric acid	2.24e-05	HL60	0	0.02	0.148418
1311	DB01783	calcium pantothenate	8e-06	HL60	0	0.02	0.148418
1313		carbarsone	1.54e-05	HL60	0	0.05	0.180902
1315	DB00115	cyanocobalamin	3e-06	HL60	0	0	0
1316		SR-95531	1.08e-05	HL60	0	0.02	0.148418
1317		lumicolchicine	1e-05	HL60	0	0.04	0.173665
1320	DB14476	dl-alpha tocopherol	9.2e-06	HL60	0	0.02	0.148418
1321	DB07352	apigenin	1.48e-05	HL60	0	0.01	0.122984
1324	DB06743	ginkgolide A	9.8e-06	HL60	0	0	0
1325		lysergol	1.58e-05	HL60	0	0.02	0.148418
1326		N-acetylmuramic acid	1.36e-05	HL60	0	0.02	0.148418
1328		pepstatin	5.8e-06	HL60	0	0.02	0.148418
1331	DB00091	ciclosporin	3.4e-06	HL60	0	0.01	0.122984
1333	DB13808	mebhydrolin	4.8e-06	HL60	0	0.02	0.148418
1334	DB02375	myricetin	1.26e-05	HL60	0	0.02	0.148418
1337	DB01602	bacampicillin	8e-06	HL60	0	0.01	0.122984
1338	DB13510	buflomedil	1.16e-05	HL60	0	0.03	0.165162
1339		digitoxigenin	1.06e-05	HL60	0	0.02	0.148418
1340	DB00521	carteolol	1.22e-05	HL60	0	0.04	0.173665
1343	DB01087	primaquine	8.8e-06	HL60	0	0	0
1344	DB00915	amantadine	9.6e-06	HL60	0	0.07	0.193563
1345	DB12480	betulinic acid	8.8e-06	HL60	0	0.05	0.180902
1346	DB12029	chlorogenic acid	1.12e-05	HL60	0	0.07	0.193563
1363	DB00704	naltrexone	9.6e-06	HL60	0	0.01	0.122984
1364	DB00358	mefloquine	9.6e-06	HL60	0	0	0
1365	DB00637	astemizole	8.8e-06	HL60	0	0.01	0.122984
1366	DB00675	tamoxifen	7e-06	HL60	0	0	0
1367	DB00602	ivermectin	4.6e-06	HL60	0	0.02	0.148418
1368	DB01119	diazoxide	1.74e-05	HL60	0	0.02	0.148418
1369	DB00822	disulfiram	1.34e-05	HL60	0	0.01	0.122984
1370		atropine oxide	1.18e-05	HL60	0	0.03	0.165162
1372	DB08943	isoconazole	9.6e-06	HL60	0	0.01	0.122984
1374	DB00699	nicergoline	8.2e-06	HL60	0	0	0
1375	DB00483	gallamine triethiodide	4.4e-06	HL60	0	0.02	0.148418
1376	DB01424	aminophenazone	1.72e-05	HL60	0	0.02	0.148418
1379	DB00844	nalbuphine	1.02e-05	HL60	0	0	0
1380	DB00421	spironolactone	9.6e-06	HL60	0	0.04	0.173665
1386		dizocilpine	1.18e-05	HL60	0	0.01	0.122984
1388	DB00670	pirenzepine	9.4e-06	HL60	0	0.02	0.148418
1390	DB01622	thioproperazine	6.2e-06	HL60	0	0.05	0.180902
1392	DB00960	pindolol	1.62e-05	HL60	0	0.05	0.180902
1394	DB01418	acenocoumarol	1.14e-05	HL60	0	0	0
1395	DB00620	triamcinolone	1.02e-05	HL60	0	0.01	0.122984
1396	DB01234	dexamethasone	9.2e-06	HL60	0	0.01	0.122984
1397	DB00759	tetracycline	8.4e-06	HL60	0	0.01	0.122984
1400		trichostatin A	1e-07	HL60	0	0.04	0.173665
1402		ampyrone	1.96e-05	HL60	0	0.22	0.258127
1403	DB00211	midodrine	1.38e-05	HL60	0	0.03	0.165162
1404	DB00863	ranitidine	1.14e-05	HL60	0	0.02	0.148418
1405	DB00554	piroxicam	1.2e-05	HL60	0	0.06	0.187021
1406	DB01059	norfloxacin	1.26e-05	HL60	0	0	0
1407	DB00749	etodolac	1.4e-05	HL60	0	0	0
1408	DB13415	pentetrazol	2.9e-05	HL60	0	0.01	0.122984
1409		etofylline	1.78e-05	HL60	0	0	0
1410	DB00848	levamisole	1.66e-05	HL60	0	0	0
1411	DB01041	thalidomide	1.54e-05	HL60	0	0.02	0.148418
1412	DB03604	tiratricol	6.4e-06	HL60	0	0.04	0.173665
1414		antimycin A	7.2e-06	HL60	0	0.03	0.165162
1415		scopolamine N-oxide	1e-05	HL60	0	0.04	0.173665
1416	DB00356	chlorzoxazone	2.36e-05	HL60	0	0.17	0.225337
1418	DB01626	pargyline	2.04e-05	HL60	0	0.01	0.122984
1419	DB13627	oxolinic acid	1.54e-05	HL60	0	0	0
1420	DB02266	flufenamic acid	1.42e-05	HL60	0	0.02	0.148418
1421		trichostatin A	1e-07	HL60	0	0	0
1422	DB08979	fenspiride	1.34e-05	HL60	0	0.03	0.165162
1423	DB06694	xylometazoline	1.42e-05	HL60	0	0.01	0.122984
1424	DB00424	hyoscyamine	1.38e-05	HL60	0	0.02	0.148418
1425	DB13026	ornidazole	1.82e-05	HL60	0	0.01	0.122984
1426	DB01616	alverine	8.4e-06	HL60	0	0.02	0.148418
1428	DB04743	nimesulide	1.3e-05	HL60	0	0.01	0.122984
1429	DB08972	flumequine	1.54e-05	HL60	0	0.02	0.148418
1430	DB01241	gemfibrozil	1.6e-05	HL60	0	0	0
1431	DB00935	oxymetazoline	1.34e-05	HL60	0	0.01	0.122984
1433	DB00593	ethosuximide	2.84e-05	HL60	0	0.02	0.148418
1435	DB00355	aztreonam	9.2e-06	HL60	0	0.02	0.148418
1437	DB09216	tolfenamic acid	1.52e-05	HL60	0	0.02	0.148418
1438		mefexamide	1.26e-05	HL60	0	0	0
1440	DB13836	metampicillin	1.04e-05	HL60	0	0.04	0.173665
1441	DB06795	mafenide	1.8e-05	HL60	0	0	0
1442	DB04818	iproniazid	1.44e-05	HL60	0	0.05	0.180902
1443	DB01147	cloxacillin	8.8e-06	HL60	0	0.02	0.148418
1444	DB00806	pentoxifylline	1.44e-05	HL60	0	0.01	0.122984
1445	DB00939	meclofenamic acid	1.18e-05	HL60	0	0.01	0.122984
1463	DB06147	sulfathiazole	1.56e-05	MCF7	0	0.09	0.203033
1464	DB00501	cimetidine	1.58e-05	MCF7	0	0.09	0.203033
1465	DB13179	troleandomycin	5e-06	MCF7	0	0.07	0.193563
1466	DB06711	naphazoline	1.62e-05	MCF7	0	0.06	0.187021
1467	DB00391	sulpiride	1.18e-05	MCF7	0	0.1	0.207695
1469	DB00527	cinchocaine	1.16e-05	MCF7	0	0.02	0.148418
1470	DB00594	amiloride	1.32e-05	MCF7	0	0.13	0.214035
1471		trichostatin A	1e-07	MCF7	0	0.11	0.210213
1472	DB01235	levodopa	2.02e-05	MCF7	0	0.06	0.187021
1474	DB00205	pyrimethamine	1.6e-05	MCF7	0	0.1	0.207695
1475	DB00208	ticlopidine	1.34e-05	MCF7	0	0.1	0.207695
1476	DB00892	oxybuprocaine	1.16e-05	MCF7	0	0.02	0.148418
1477	DB01110	miconazole	9.6e-06	MCF7	0	0.11	0.210213
1478	DB00635	prednisone	1.12e-05	MCF7	0	0.07	0.193563
1480	DB00249	idoxuridine	1.12e-05	MCF7	0	0.06	0.187021
1481	DB00330	ethambutol	1.44e-05	MCF7	0	0.07	0.193563
1483	DB00804	dicycloverine	1.16e-05	MCF7	0	0.05	0.180902
1484	DB12532	oxetacaine	8.6e-06	MCF7	0	0.06	0.187021
1486	DB00679	thioridazine	9.8e-06	MCF7	0	0.12	0.210647
1487	DB00999	hydrochlorothiazide	1.34e-05	MCF7	0	0.06	0.187021
1488	DB01197	captopril	1.72e-05	MCF7	0	0.09	0.203033
1489	DB01435	phenazone	2.12e-05	MCF7	0	0.09	0.203033
1490	DB00861	diflunisal	1.6e-05	MCF7	0	0.08	0.197251
1491	DB09088	amylocaine	1.48e-05	MCF7	0	0.05	0.180902
1492	DB01620	pheniramine	1.12e-05	MCF7	0	0.08	0.197251
1493	DB01193	acebutolol	1.08e-05	MCF7	0	0.08	0.197251
1494	DB13720	diphemanil metilsulfate	1.02e-05	MCF7	0	0.12	0.210647
1495	DB13726	sulfaguanidine	1.86e-05	MCF7	0	0.04	0.173665
1497		4-hydroxyphenazone	1.96e-05	MCF7	0	0.08	0.197251
1498	DB06803	niclosamide	1.22e-05	MCF7	0	0.08	0.197251
1499	DB00281	lidocaine	1.48e-05	MCF7	0	0.04	0.173665
1500	DB00797	tolazoline	2.04e-05	MCF7	0	0.17	0.225337
1501	DB00525	tolnaftate	1.3e-05	MCF7	0	0.05	0.180902
1502	DB00662	trimethobenzamide	9.4e-06	MCF7	0	0.13	0.214035
1503	DB00916	metronidazole	2.34e-05	MCF7	0	0.09	0.203033
1504		khellin	1.54e-05	MCF7	0	0.1	0.207695
1505	DB00714	apomorphine	6.4e-06	MCF7	0	0.09	0.203033
1506	DB01183	naloxone	1.1e-05	MCF7	0	0.06	0.187021
1507	DB01200	bromocriptine	5.4e-06	MCF7	0	0.08	0.197251
1508	DB01067	glipizide	9e-06	MCF7	0	0.16	0.221768
1510	DB00199	erythromycin	5.4e-06	MCF7	0	0.09	0.203033
1511		cotinine	2.26e-05	MCF7	0	0.14	0.215059
1512	DB04832	zimeldine	9.8e-06	MCF7	0	0.09	0.203033
1513	DB00543	amoxapine	1.28e-05	MCF7	0	0.08	0.197251
1514	DB00524	metolazone	1.1e-05	MCF7	0	0.05	0.180902
1515		metanephrine	1.72e-05	MCF7	0	0.05	0.180902
1518	DB11442	oleandomycin	5e-06	MCF7	0	0.04	0.173665
1519	DB01010	edrophonium chloride	1.98e-05	MCF7	0	0.11	0.210213
1521	DB00434	cyproheptadine	1.24e-05	MCF7	0	0.13	0.214035
1522	DB00537	ciprofloxacin	1.08e-05	MCF7	0	0.08	0.197251
1523	DB11622	dehydrocholic acid	9.6e-06	MCF7	0	0.11	0.210213
1524	DB00557	hydroxyzine	9e-06	MCF7	0	0.08	0.197251
1525	DB00878	chlorhexidine	8e-06	MCF7	0	0.18	0.230769
1528	DB00993	azathioprine	1.44e-05	MCF7	0	0.06	0.187021
1529	DB00927	famotidine	1.18e-05	MCF7	0	0.11	0.210213
1530	DB00415	ampicillin	1e-05	MCF7	0	0.06	0.187021
1531	DB01094	hesperetin	1.32e-05	MCF7	0	0.04	0.173665
1532	DB00343	diltiazem	8.8e-06	MCF7	0	0.11	0.210213
1534	DB01321	josamycin	4.8e-06	MCF7	0	0.06	0.187021
1535		trichostatin A	1e-07	MCF7	0	0.17	0.225337
1536	DB00181	baclofen	1.88e-05	MCF7	0	0.09	0.203033
1537	DB12474	lynestrenol	1.4e-05	MCF7	0	0.05	0.180902
1538	DB01406	danazol	1.18e-05	MCF7	0	0.06	0.187021
1539	DB00502	haloperidol	1.06e-05	MCF7	0	0.07	0.193563
1540	DB00850	perphenazine	1e-05	MCF7	0	0.11	0.210213
1542	DB01229	paclitaxel	4.6e-06	MCF7	0	0.09	0.203033
1543	DB00787	aciclovir	1.78e-05	MCF7	0	0.08	0.197251
1545	DB00589	lisuride	1.18e-05	MCF7	0	0.12	0.210647
1549	DB00257	clotrimazole	1.16e-05	HL60	0	0.05	0.180902
1550	DB00598	labetalol	1.1e-05	HL60	0	0.02	0.148418
1551	DB01062	oxybutynin	1.02e-05	HL60	0	0.01	0.122984
1552	DB09084	benzydamine	1.16e-05	HL60	0	0.02	0.148418
1553	DB00595	oxytetracycline	8e-06	HL60	0	0.04	0.173665
1554	DB01170	guanethidine	1.34e-05	HL60	0	0.04	0.173665
1555	DB00575	clonidine	1.5e-05	HL60	0	0	0
1556	DB08799	antazoline	1.32e-05	HL60	0	0.03	0.165162
1557	DB12131	vinpocetine	1.14e-05	HL60	0	0.03	0.165162
1558	DB00568	cinnarizine	1.08e-05	HL60	0	0.01	0.122984
1559		spiperone	1.02e-05	HL60	0	0.01	0.122984
1560	DB13790	fipexide	9.4e-06	HL60	0	0.04	0.173665
1564	DB01156	bupropion	1.44e-05	HL60	0	0.01	0.122984
1566	DB01242	clomipramine	1.14e-05	HL60	0	0.02	0.148418
1567	DB00959	methylprednisolone	1.06e-05	HL60	0	0.01	0.122984
1571	DB00866	alprenolol	1.4e-05	HL60	0	0	0
1572	DB01058	praziquantel	1.28e-05	HL60	0	0.01	0.122984
1573	DB08980	fendiline	1.14e-05	HL60	0	0	0
1574	DB01138	sulfinpyrazone	9.8e-06	HL60	0	0	0
1575		diperodon	9.2e-06	HL60	0	0.02	0.148418
1576	DB12554	mebeverine	8.6e-06	HL60	0	0	0
1578	DB01082	streptomycin	2.8e-06	HL60	0	0	0
1579		tremorine	1.5e-05	HL60	0	0	0
1581	DB00310	chlortalidone	1.18e-05	HL60	0	0	0
1582	DB01408	bambuterol	1e-05	HL60	0	0.02	0.148418
1583	DB00920	ketotifen	9.4e-06	HL60	0	0.01	0.122984
1586	DB00346	alfuzosin	9.4e-06	HL60	0	0.02	0.148418
1587	DB01297	practolol	1.5e-05	HL60	0	0	0
1588	DB04819	methapyrilene	1.34e-05	HL60	0	0.03	0.165162
1589	DB00841	dobutamine	1.18e-05	HL60	0	0.02	0.148418
1591	DB04840	debrisoquine	9e-06	HL60	0	0.02	0.148418
1592	DB00195	betaxolol	1.16e-05	HL60	0	0.01	0.122984
1593	DB12465	ketanserin	7e-06	HL60	0	0	0
1594	DB00672	chlorpropamide	1.44e-05	HL60	0	0.03	0.165162
1595	DB00495	zidovudine	1.5e-05	HL60	0	0.04	0.173665
1596	DB01151	desipramine	1.32e-05	HL60	0	0.01	0.122984
1598	DB01394	colchicine	1e-05	HL60	0	0.01	0.122984
1599	DB00563	methotrexate	8.8e-06	HL60	0	0.03	0.165162
1601		hemicholinium	7e-06	HL60	0	0	0
1602	DB00397	phenylpropanolamine	2.14e-05	HL60	0	0.02	0.148418
1603	DB00263	sulfafurazole	1.5e-05	HL60	0	0	0
1604	DB04017	clorgiline	1.3e-05	HL60	0	0.01	0.122984
1606	DB13520	metergoline	1e-05	HL60	0	0	0
1608	DB01599	probucol	7.8e-06	HL60	0	0	0
1609	DB01172	kanamycin	6.8e-06	HL60	0	0.03	0.165162
1610	DB00126	ascorbic acid	2.24e-05	HL60	0	0	0
1612		trichostatin A	1e-07	HL60	0	0	0
1614	DB14061	hycanthone	1.12e-05	HL60	0	0.02	0.148418
1615	DB01194	brinzolamide	1.04e-05	HL60	0	0	0
1616		metitepine	8.4e-06	HL60	0	0	0
1618	DB00479	amikacin	6.6e-06	HL60	0	0	0
1619	DB00968	methyldopa	1.9e-05	HL60	0	0	0
1620	DB01178	chlormezanone	1.46e-05	HL60	0	0.02	0.148418
1621	DB00934	maprotiline	1.28e-05	HL60	0	0.02	0.148418
1622	DB00131	adenosine phosphate	1.1e-05	HL60	0	0.02	0.148418
1623	DB06742	ambroxol	9.6e-06	HL60	0	0.02	0.148418
1624	DB00845	clofazimine	8.4e-06	HL60	0	0	0
1625	DB03701	vanoxerine	7.6e-06	HL60	0	0	0
1627	DB01329	cefoperazone	5.8e-06	HL60	0	0.01	0.122984
1628	DB00502	haloperidol	1e-05	MCF7	0	0.02	0.148418
1629	DB00945	acetylsalicylic acid	0.0001	MCF7	0	0.04	0.173665
1630	DB00947	fulvestrant	1e-06	MCF7	0	0.01	0.122984
1631	DB05134	tanespimycin	1e-06	MCF7	0	0.05	0.180902
1632	DB00877	sirolimus	1e-07	MCF7	0	0.03	0.165162
1633	DB00783	estradiol	1e-07	MCF7	0	0.03	0.165162
1634	DB00313	valproic acid	0.001	MCF7	0	0.02	0.148418
1635		alpha-estradiol	1e-08	MCF7	0	0.01	0.122984
1636	DB00755	tretinoin	1e-06	MCF7	0	0.03	0.165162
1637		trichostatin A	1e-07	MCF7	0	0.03	0.165162
1638	DB12442	alvespimycin	1e-07	MCF7	0	0.04	0.173665
1639	DB00313	valproic acid	0.0002	MCF7	0	0.03	0.165162
1640	DB00433	prochlorperazine	1e-05	MCF7	0	0.03	0.165162
1641	DB02656	LY-294002	1e-07	MCF7	0	0.01	0.122984
1642	DB00477	chlorpromazine	1e-06	MCF7	0	0.02	0.148418
1643	DB05134	tanespimycin	1e-06	MCF7	0	0.01	0.122984
1644		monorden	1e-07	MCF7	0	0.01	0.122984
1646	DB00877	sirolimus	1e-07	MCF7	0	0	0
1647	DB00313	valproic acid	5e-05	MCF7	0	0.04	0.173665
1648	DB00179	nordihydroguaiaretic acid	1e-06	MCF7	0	0.04	0.173665
1649	DB00831	trifluoperazine	1e-05	MCF7	0	0.02	0.148418
1650	DB05134	tanespimycin	1e-06	MCF7	0	0.02	0.148418
1651	DB05134	tanespimycin	1e-06	MCF7	0	0.01	0.122984
1652	DB02656	LY-294002	1e-05	MCF7	0	0.02	0.148418
1653	DB02424	geldanamycin	1e-06	MCF7	0	0.02	0.148418
1654	DB00363	clozapine	1e-05	MCF7	0	0.04	0.173665
1655	DB00679	thioridazine	1e-05	MCF7	0	0.05	0.180902
1656		15-delta prostaglandin J2	1e-05	MCF7	0	0.05	0.180902
1657	DB00197	troglitazone	1e-05	MCF7	0	0.06	0.187021
1658	DB00412	rosiglitazone	1e-05	MCF7	0	0.02	0.148418
1659		trichostatin A	1e-06	MCF7	0	0.04	0.173665
1660	DB01645	genistein	1e-05	MCF7	0	0.01	0.122984
1661	DB02656	LY-294002	1e-05	MCF7	0	0.01	0.122984
1662	DB00623	fluphenazine	1e-05	MCF7	0	0.01	0.122984
1663	DB00947	fulvestrant	1e-08	MCF7	0	0.04	0.173665
1664	DB02656	LY-294002	1e-05	MCF7	0	0.04	0.173665
1665	DB00313	valproic acid	0.0005	MCF7	0	0.08	0.197251
1666	DB00783	estradiol	1e-08	MCF7	0	0.06	0.187021
1667	DB00877	sirolimus	1e-07	MCF7	0	0.05	0.180902
1668	DB08059	wortmannin	1e-08	MCF7	0	0.07	0.193563
1669	DB00502	haloperidol	1e-05	MCF7	0	0.07	0.193563
1670	DB01667	8-azaguanine	2.62e-05	MCF7	0	0.05	0.180902
1671	DB13284	meticrane	1.46e-05	MCF7	0	0.03	0.165162
1672		trichostatin A	1e-07	MCF7	0	0.04	0.173665
1673	DB06729	sulfaphenazole	1.28e-05	MCF7	0	0.06	0.187021
1674	DB00721	procaine	1.46e-05	MCF7	0	0	0
1675	DB11473	metrifonate	1.56e-05	MCF7	0	0.05	0.180902
1676		morantel	1.08e-05	MCF7	0	0.01	0.122984
1677		todralazine	1.48e-05	MCF7	0	0.02	0.148418
1678	DB11100	allantoin	2.52e-05	MCF7	0	0.03	0.165162
1679	DB00868	benzonatate	6.6e-06	MCF7	0	0.05	0.180902
1680	DB09357	dexpanthenol	1.94e-05	MCF7	0	0	0
1681	DB08991	epirizole	1.7e-05	MCF7	0	0.01	0.122984
1682	DB09205	moxisylyte	1.26e-05	MCF7	0	0.01	0.122984
1683	DB00564	carbamazepine	1.7e-05	MCF7	0	0.04	0.173665
1684	DB11181	homatropine	1.12e-05	MCF7	0	0.02	0.148418
1685	DB00458	imipramine	1.26e-05	MCF7	0	0.01	0.122984
1686	DB00819	acetazolamide	1.8e-05	MCF7	0	0.03	0.165162
1687	DB00774	hydroflumethiazide	1.2e-05	MCF7	0	0.03	0.165162
1688	DB00359	sulfadiazine	1.6e-05	MCF7	0	0.05	0.180902
1689	DB00651	diprophylline	1.58e-05	MCF7	0	0.06	0.187021
1690	DB00272	betazole	2.7e-05	MCF7	0	0.01	0.122984
1691	DB00508	triflupromazine	1.02e-05	MCF7	0	0.01	0.122984
1692	DB01115	nifedipine	1.16e-05	MCF7	0	0.05	0.180902
1693	DB00605	sulindac	1.12e-05	MCF7	0	0.09	0.203033
1694	DB00331	metformin	2.42e-05	MCF7	0	0.05	0.180902
1695	DB00634	sulfacetamide	1.58e-05	MCF7	0	0.03	0.165162
1696	DB09371	noretynodrel	1.34e-05	MCF7	0	0.01	0.122984
1697	DB00384	triamterene	1.58e-05	MCF7	0	0.04	0.173665
1698	DB08942	isoxicam	1.2e-05	MCF7	0	0.03	0.165162
1699	DB00784	mefenamic acid	1.66e-05	MCF7	0	0.02	0.148418
1700	DB00477	chlorpromazine	1.12e-05	MCF7	0	0.02	0.148418
1701	DB00321	amitriptyline	1.28e-05	MCF7	0	0.04	0.173665
1702	DB00732	atracurium besilate	3.2e-06	MCF7	0	0.02	0.148418
1703	DB13574	heptaminol	2.2e-05	MCF7	0	0.02	0.148418
1704	DB08621	thiamphenicol	1.12e-05	MCF7	0	0.03	0.165162
1705	DB00250	dapsone	1.62e-05	MCF7	0	0.07	0.193563
1706	DB00788	naproxen	1.74e-05	MCF7	0	0.05	0.180902
1707	DB00414	acetohexamide	1.24e-05	MCF7	0	0.08	0.197251
1708	DB01075	diphenhydramine	1.38e-05	MCF7	0	0.1	0.207695
1709		adiphenine	1.14e-05	MCF7	0	0.05	0.180902
1711	DB09282	molsidomine	1.66e-05	HL60	0	0.04	0.173665
1712	DB00954	dirithromycin	4.8e-06	HL60	0	0.22	0.258127
1713	DB09167	dosulepin	1.2e-05	HL60	0	0.06	0.187021
1715	DB02709	resveratrol	1.76e-05	HL60	0	0.05	0.180902
1716	DB01222	budesonide	9.2e-06	HL60	0	0.04	0.173665
1717	DB08814	triflusal	1.62e-05	HL60	0	0	0
1720	DB01120	gliclazide	1.24e-05	HL60	0	0	0
1721	DB00438	ceftazidime	6.2e-06	HL60	0	0.01	0.122984
1722	DB01182	propafenone	1.06e-05	HL60	0	0.08	0.197251
1723	DB12401	bromperidol	9.6e-06	HL60	0	0.06	0.187021
1724	DB01598	imipenem	1.34e-05	HL60	0	0.01	0.122984
1725	DB00933	mesoridazine	7.4e-06	HL60	0	0.02	0.148418
1726	DB11582	thiocolchicoside	7e-06	HL60	0	0.02	0.148418
1727	DB09069	trimetazidine	1.18e-05	HL60	0	0.01	0.122984
1728		Prestwick-559	8.2e-06	HL60	0	0.06	0.187021
1729	DB06704	iobenguane	1.08e-05	HL60	0	0.03	0.165162
1730	DB08989	etamivan	1.8e-05	HL60	0	0.08	0.197251
1731	DB01176	cyclizine	1.32e-05	HL60	0	0.01	0.122984
1732		trichostatin A	1e-07	HL60	0	0	0
1734		Trolox C	1.6e-05	HL60	0	0.03	0.165162
1736	DB13063	parthenolide	1.62e-05	HL60	0	0	0
1737	DB04825	prenylamine	9.6e-06	HL60	0	0.02	0.148418
1738	DB01199	tubocurarine chloride	5.2e-06	HL60	0	0.04	0.173665
1739	DB09085	tetracaine	1.32e-05	HL60	0	0.03	0.165162
1740		hydrastine hydrochloride	9.6e-06	HL60	0	0.02	0.148418
1741		laudanosine	1.12e-05	HL60	0	0.02	0.148418
1743		10-methoxyharmalan	1.86e-05	HL60	0	0.01	0.122984
1744	DB00152	thiamine	1.18e-05	HL60	0	0.04	0.173665
1746	DB00764	mometasone	7.6e-06	HL60	0	0.04	0.173665
1748		raubasine	1.02e-05	HL60	0	0.05	0.180902
1749	DB01426	ajmaline	1.22e-05	HL60	0	0.2	0.242304
1751	DB04284	stachydrine	2.22e-05	HL60	0	0.04	0.173665
1753	DB06174	noscapine	9.6e-06	HL60	0	0.01	0.122984
1755	DB01113	papaverine	1.06e-05	HL60	0	0	0
1756		tetrahydroalstonine	1.14e-05	HL60	0	0.02	0.148418
1757		monocrotaline	1.22e-05	HL60	0	0.03	0.165162
1758		harmine	1.6e-05	HL60	0	0.01	0.122984
1759	DB00165	pyridoxine	1.94e-05	HL60	0	0.01	0.122984
1761		syrosingopine	6e-06	HL60	0	0	0
1762	DB00851	dacarbazine	2.2e-05	HL60	0	0	0
1763	DB01392	yohimbine	1.02e-05	HL60	0	0	0
1764		piperlongumine	1.26e-05	HL60	0	0.01	0.122984
1765		ellipticine	1.62e-05	HL60	0	0.01	0.122984
1766	DB09028	cytisine	2.1e-05	HL60	0	0.02	0.148418
1767	DB00140	riboflavin	1.06e-05	HL60	0	0	0
1768	DB00572	atropine	5.8e-06	HL60	0	0.02	0.148418
1769	DB00332	ipratropium bromide	9.8e-06	HL60	0	0	0
1772		hydrocotarnine	1.32e-05	HL60	0	0	0
1773		1,4-chrysenequinone	1.54e-05	HL60	0	0.02	0.148418
1777	DB01614	acepromazine	9e-06	HL60	0	0.08	0.197251
1778	DB04115	berberine	1.08e-05	HL60	0	0.03	0.165162
1779		convolamine	1.18e-05	HL60	0	0.02	0.148418
1780		cinchonidine	1.36e-05	HL60	0	0.03	0.165162
1781	DB00944	demecarium bromide	5.6e-06	HL60	0	0.03	0.165162
1782	DB11696	racecadotril	1.04e-05	HL60	0	0.03	0.165162
1783		epivincamine	1.12e-05	HL60	0	0.01	0.122984
1784		aconitine	6.2e-06	HL60	0	0.03	0.165162
1787		isocorydine	1.18e-05	HL60	0	0.12	0.210647
1788	DB13793	vinburnine	1.36e-05	HL60	0	0.02	0.148418
1791	DB01667	8-azaguanine	2.62e-05	PC3	0	0	0
1792	DB13284	meticrane	1.46e-05	PC3	0	0	0
1794	DB06729	sulfaphenazole	1.28e-05	PC3	0	0	0
1795	DB00446	chloramphenicol	1.24e-05	PC3	0	0.02	0.148418
1796	DB00721	procaine	1.46e-05	PC3	0	0.06	0.187021
1797	DB11473	metrifonate	1.56e-05	PC3	0	0.01	0.122984
1798		morantel	1.08e-05	PC3	0	0.01	0.122984
1800	DB11100	allantoin	2.52e-05	PC3	0	0.04	0.173665
1801	DB00868	benzonatate	6.6e-06	PC3	0	0.03	0.165162
1802	DB09357	dexpanthenol	1.94e-05	PC3	0	0.01	0.122984
1803	DB08991	epirizole	1.7e-05	PC3	0	0.06	0.187021
1804	DB09205	moxisylyte	1.26e-05	PC3	0	0.06	0.187021
1805	DB00564	carbamazepine	1.7e-05	PC3	0	0.04	0.173665
1806	DB11181	homatropine	1.12e-05	PC3	0	0.07	0.193563
1807	DB00458	imipramine	1.26e-05	PC3	0	0.03	0.165162
1808	DB00819	acetazolamide	1.8e-05	PC3	0	0.07	0.193563
1809	DB00774	hydroflumethiazide	1.2e-05	PC3	0	0.04	0.173665
1810	DB00359	sulfadiazine	1.6e-05	PC3	0	0.02	0.148418
1811	DB00651	diprophylline	1.58e-05	PC3	0	0.02	0.148418
1812	DB00272	betazole	2.7e-05	PC3	0	0.06	0.187021
1813	DB00508	triflupromazine	1.02e-05	PC3	0	0.09	0.203033
1814	DB01115	nifedipine	1.16e-05	PC3	0	0.03	0.165162
1816	DB00331	metformin	2.42e-05	PC3	0	0.03	0.165162
1817	DB00634	sulfacetamide	1.58e-05	PC3	0	0.08	0.197251
1818	DB09371	noretynodrel	1.34e-05	PC3	0	0.08	0.197251
1819	DB00384	triamterene	1.58e-05	PC3	0	0.06	0.187021
1820	DB08942	isoxicam	1.2e-05	PC3	0	0.03	0.165162
1821	DB00784	mefenamic acid	1.66e-05	PC3	0	0.04	0.173665
1822	DB00477	chlorpromazine	1.12e-05	PC3	0	0.03	0.165162
1823	DB00321	amitriptyline	1.28e-05	PC3	0	0.03	0.165162
1824	DB00732	atracurium besilate	3.2e-06	PC3	0	0.05	0.180902
1825	DB13574	heptaminol	2.2e-05	PC3	0	0.06	0.187021
1826	DB08621	thiamphenicol	1.12e-05	PC3	0	0.05	0.180902
1827	DB00250	dapsone	1.62e-05	PC3	0	0.04	0.173665
1828	DB00788	naproxen	1.74e-05	PC3	0	0.03	0.165162
1829	DB00414	acetohexamide	1.24e-05	PC3	0	0	0
1830	DB01075	diphenhydramine	1.38e-05	PC3	0	0.05	0.180902
1831		adiphenine	1.14e-05	PC3	0	0.05	0.180902
1832	DB11522	isoflupredone	9.6e-06	PC3	0	0.02	0.148418
1833	DB01667	8-azaguanine	2.62e-05	HL60	0	0	0
1834	DB13284	meticrane	1.46e-05	HL60	0	0	0
1835		trichostatin A	1e-07	HL60	0	0.01	0.122984
1836	DB06729	sulfaphenazole	1.28e-05	HL60	0	0	0
1837	DB00446	chloramphenicol	1.24e-05	HL60	0	0	0
1838	DB00721	procaine	1.46e-05	HL60	0	0.03	0.165162
1839	DB11473	metrifonate	1.56e-05	HL60	0	0	0
1840		morantel	1.08e-05	HL60	0	0	0
1841		todralazine	1.48e-05	HL60	0	0	0
1842	DB11100	allantoin	2.52e-05	HL60	0	0	0
1843	DB00868	benzonatate	6.6e-06	HL60	0	0.01	0.122984
1846	DB09205	moxisylyte	1.26e-05	HL60	0	0.02	0.148418
1847	DB00564	carbamazepine	1.7e-05	HL60	0	0.01	0.122984
1848	DB11181	homatropine	1.12e-05	HL60	0	0.02	0.148418
1849	DB00458	imipramine	1.26e-05	HL60	0	0.02	0.148418
1850	DB00819	acetazolamide	1.8e-05	HL60	0	0.04	0.173665
1851	DB00774	hydroflumethiazide	1.2e-05	HL60	0	0.01	0.122984
1853	DB00651	diprophylline	1.58e-05	HL60	0	0.02	0.148418
1854	DB00272	betazole	2.7e-05	HL60	0	0.01	0.122984
1855	DB00508	triflupromazine	1.02e-05	HL60	0	0.04	0.173665
1856	DB01115	nifedipine	1.16e-05	HL60	0	0.03	0.165162
1858	DB00331	metformin	2.42e-05	HL60	0	0.04	0.173665
1859	DB00634	sulfacetamide	1.58e-05	HL60	0	0.01	0.122984
1860	DB09371	noretynodrel	1.34e-05	HL60	0	0.02	0.148418
1861	DB00384	triamterene	1.58e-05	HL60	0	0.01	0.122984
1862	DB08942	isoxicam	1.2e-05	HL60	0	0.02	0.148418
1868	DB00250	dapsone	1.62e-05	HL60	0	0.03	0.165162
1869	DB00788	naproxen	1.74e-05	HL60	0	0.03	0.165162
1871	DB01075	diphenhydramine	1.38e-05	HL60	0	0.02	0.148418
1872		adiphenine	1.14e-05	HL60	0	0.05	0.180902
1873	DB11522	isoflupredone	9.6e-06	HL60	0	0.04	0.173665
1883	DB06147	sulfathiazole	1.56e-05	PC3	0	0.04	0.173665
1885	DB13179	troleandomycin	5e-06	PC3	0	0.02	0.148418
1886	DB06711	naphazoline	1.62e-05	PC3	0	0.03	0.165162
1887	DB00391	sulpiride	1.18e-05	PC3	0	0.04	0.173665
1888	DB00805	minaprine	1.08e-05	PC3	0	0	0
1889	DB00527	cinchocaine	1.16e-05	PC3	0	0.03	0.165162
1890	DB00594	amiloride	1.32e-05	PC3	0	0.01	0.122984
1892	DB01235	levodopa	2.02e-05	PC3	0	0.02	0.148418
1893	DB00366	doxylamine	1.02e-05	PC3	0	0.03	0.165162
1894	DB00205	pyrimethamine	1.6e-05	PC3	0	0.07	0.193563
1895	DB00208	ticlopidine	1.34e-05	PC3	0	0.06	0.187021
1896	DB01110	miconazole	9.6e-06	PC3	0	0.03	0.165162
1897	DB00635	prednisone	1.12e-05	PC3	0	0.05	0.180902
1898		amprolium	1.26e-05	PC3	0	0.03	0.165162
1899	DB00249	idoxuridine	1.12e-05	PC3	0	0.02	0.148418
1900	DB00330	ethambutol	1.44e-05	PC3	0	0.04	0.173665
1902	DB00804	dicycloverine	1.16e-05	PC3	0	0.02	0.148418
1904	DB08941	isoxsuprine	1.18e-05	PC3	0	0.01	0.122984
1905	DB00679	thioridazine	9.8e-06	PC3	0	0.07	0.193563
1906	DB00999	hydrochlorothiazide	1.34e-05	PC3	0	0.02	0.148418
1907	DB01197	captopril	1.72e-05	PC3	0	0.01	0.122984
1908	DB00861	diflunisal	1.6e-05	PC3	0	0.01	0.122984
1909	DB09088	amylocaine	1.48e-05	PC3	0	0.01	0.122984
1910	DB01620	pheniramine	1.12e-05	PC3	0	0.03	0.165162
1911	DB01193	acebutolol	1.08e-05	PC3	0	0.03	0.165162
1912	DB13720	diphemanil metilsulfate	1.02e-05	PC3	0	0.04	0.173665
1913	DB13726	sulfaguanidine	1.86e-05	PC3	0	0.01	0.122984
1914	DB00350	minoxidil	1.92e-05	PC3	0	0.02	0.148418
1915		4-hydroxyphenazone	1.96e-05	PC3	0	0.06	0.187021
1916	DB06803	niclosamide	1.22e-05	PC3	0	0.02	0.148418
1917	DB00281	lidocaine	1.48e-05	PC3	0	0.02	0.148418
1918	DB00797	tolazoline	2.04e-05	PC3	0	0	0
1919	DB00525	tolnaftate	1.3e-05	PC3	0	0.02	0.148418
1920	DB00662	trimethobenzamide	9.4e-06	PC3	0	0.04	0.173665
1921	DB00916	metronidazole	2.34e-05	PC3	0	0.1	0.207695
1922		khellin	1.54e-05	PC3	0	0	0
1923	DB00714	apomorphine	6.4e-06	PC3	0	0	0
1924	DB01183	naloxone	1.1e-05	PC3	0	0.02	0.148418
1925	DB01200	bromocriptine	5.4e-06	PC3	0	0.02	0.148418
1926	DB01067	glipizide	9e-06	PC3	0	0.03	0.165162
1927	DB00661	verapamil	8.2e-06	PC3	0	0.03	0.165162
1928	DB00199	erythromycin	5.4e-06	PC3	0	0.02	0.148418
1929		cotinine	2.26e-05	PC3	0	0.01	0.122984
1930	DB04832	zimeldine	9.8e-06	PC3	0	0.04	0.173665
1931	DB00543	amoxapine	1.28e-05	PC3	0	0.02	0.148418
1932	DB00524	metolazone	1.1e-05	PC3	0	0.02	0.148418
1933		metanephrine	1.72e-05	PC3	0	0.02	0.148418
1934	DB00975	dipyridamole	8e-06	PC3	0	0.02	0.148418
1935	DB11442	oleandomycin	5e-06	PC3	0	0.02	0.148418
1936	DB01010	edrophonium chloride	1.98e-05	PC3	0	0	0
1937		azacyclonol	1.5e-05	PC3	0	0.04	0.173665
1938	DB00434	cyproheptadine	1.24e-05	PC3	0	0.04	0.173665
1939	DB00537	ciprofloxacin	1.08e-05	PC3	0	0.02	0.148418
1941	DB00557	hydroxyzine	9e-06	PC3	0	0	0
1942	DB00878	chlorhexidine	8e-06	PC3	0	0.19	0.235953
1943	DB13456	midecamycin	5e-06	PC3	0	0.04	0.173665
1944	DB13597	moroxydine	1.92e-05	PC3	0	0.04	0.173665
1945	DB00993	azathioprine	1.44e-05	PC3	0	0.03	0.165162
1947	DB01094	hesperetin	1.32e-05	PC3	0	0.03	0.165162
1948	DB00343	diltiazem	8.8e-06	PC3	0	0	0
1952	DB00181	baclofen	1.88e-05	PC3	0	0.04	0.173665
1953	DB12474	lynestrenol	1.4e-05	PC3	0	0.03	0.165162
1954	DB01406	danazol	1.18e-05	PC3	0	0	0
1955	DB00502	haloperidol	1.06e-05	PC3	0	0.02	0.148418
1956	DB00850	perphenazine	1e-05	PC3	0	0	0
1957	DB00563	methotrexate	8.8e-06	PC3	0	0.03	0.165162
1958	DB09093	chlortetracycline	7.8e-06	PC3	0	0.02	0.148418
1959	DB01229	paclitaxel	4.6e-06	PC3	0	0.03	0.165162
1960	DB00787	aciclovir	1.78e-05	PC3	0	0.01	0.122984
1961	DB00629	guanabenz	1.38e-05	PC3	0	0.02	0.148418
1962	DB00589	lisuride	1.18e-05	PC3	0	0.02	0.148418
1964	DB00501	cimetidine	1.58e-05	HL60	0	0.01	0.122984
1968	DB00805	minaprine	1.08e-05	HL60	0	0	0
1969	DB00527	cinchocaine	1.16e-05	HL60	0	0.01	0.122984
1970	DB00594	amiloride	1.32e-05	HL60	0	0	0
1971		trichostatin A	1e-07	HL60	0	0	0
1972	DB01235	levodopa	2.02e-05	HL60	0	0	0
1974	DB00205	pyrimethamine	1.6e-05	HL60	0	0.02	0.148418
1975	DB00208	ticlopidine	1.34e-05	HL60	0	0	0
1976	DB00892	oxybuprocaine	1.16e-05	HL60	0	0.04	0.173665
1977	DB01110	miconazole	9.6e-06	HL60	0	0.03	0.165162
1978	DB00635	prednisone	1.12e-05	HL60	0	0	0
1979		amprolium	1.26e-05	HL60	0	0	0
1980	DB00249	idoxuridine	1.12e-05	HL60	0	0	0
1981	DB00330	ethambutol	1.44e-05	HL60	0	0	0
1982	DB08960	hexamethonium bromide	1e-05	HL60	0	0.01	0.122984
1983	DB00804	dicycloverine	1.16e-05	HL60	0	0.05	0.180902
1984	DB12532	oxetacaine	8.6e-06	HL60	0	0.01	0.122984
1985	DB08941	isoxsuprine	1.18e-05	HL60	0	0	0
1988	DB01197	captopril	1.72e-05	HL60	0	0	0
1989	DB01435	phenazone	2.12e-05	HL60	0	0.03	0.165162
1991	DB09088	amylocaine	1.48e-05	HL60	0	0	0
1992	DB01620	pheniramine	1.12e-05	HL60	0	0	0
1993	DB01193	acebutolol	1.08e-05	HL60	0	0.01	0.122984
1996	DB00350	minoxidil	1.92e-05	HL60	0	0	0
1997		4-hydroxyphenazone	1.96e-05	HL60	0	0	0
1998	DB06803	niclosamide	1.22e-05	HL60	0	0.01	0.122984
1999	DB00281	lidocaine	1.48e-05	HL60	0	0.01	0.122984
2001	DB00525	tolnaftate	1.3e-05	HL60	0	0.01	0.122984
2003	DB00916	metronidazole	2.34e-05	HL60	0	0.03	0.165162
2005	DB00714	apomorphine	6.4e-06	HL60	0	0	0
2006	DB01183	naloxone	1.1e-05	HL60	0	0.01	0.122984
2007	DB01200	bromocriptine	5.4e-06	HL60	0	0.01	0.122984
2008	DB01067	glipizide	9e-06	HL60	0	0.02	0.148418
2009	DB00661	verapamil	8.2e-06	HL60	0	0.05	0.180902
2010	DB00199	erythromycin	5.4e-06	HL60	0	0.01	0.122984
2013	DB00543	amoxapine	1.28e-05	HL60	0	0.03	0.165162
2018	DB11442	oleandomycin	5e-06	HL60	0	0.01	0.122984
2019	DB01010	edrophonium chloride	1.98e-05	HL60	0	0.01	0.122984
2021	DB00434	cyproheptadine	1.24e-05	HL60	0	0.01	0.122984
2022	DB00537	ciprofloxacin	1.08e-05	HL60	0	0.01	0.122984
2023	DB11622	dehydrocholic acid	9.6e-06	HL60	0	0.01	0.122984
2024	DB00557	hydroxyzine	9e-06	HL60	0	0.01	0.122984
2025	DB00878	chlorhexidine	8e-06	HL60	0	0.02	0.148418
2026	DB13456	midecamycin	5e-06	HL60	0	0.01	0.122984
2028	DB00993	azathioprine	1.44e-05	HL60	0	0.03	0.165162
2029	DB00927	famotidine	1.18e-05	HL60	0	0.03	0.165162
2031	DB01094	hesperetin	1.32e-05	HL60	0	0	0
2032	DB00343	diltiazem	8.8e-06	HL60	0	0.01	0.122984
2033	DB00836	loperamide	7.8e-06	HL60	0	0.06	0.187021
2034	DB01321	josamycin	4.8e-06	HL60	0	0.05	0.180902
2039	DB00502	haloperidol	1.06e-05	HL60	0	0.02	0.148418
2041	DB00563	methotrexate	8.8e-06	HL60	0	0.01	0.122984
2043	DB01229	paclitaxel	4.6e-06	HL60	0	0.01	0.122984
2045	DB00629	guanabenz	1.38e-05	HL60	0	0.02	0.148418
2047	DB00704	naltrexone	9.6e-06	PC3	0	0.05	0.180902
2048	DB00358	mefloquine	9.6e-06	PC3	0	0.03	0.165162
2049	DB00637	astemizole	8.8e-06	PC3	0	0.03	0.165162
2050	DB00675	tamoxifen	7e-06	PC3	0	0.03	0.165162
2051	DB00602	ivermectin	4.6e-06	PC3	0	0.02	0.148418
2052	DB01119	diazoxide	1.74e-05	PC3	0	0.03	0.165162
2053	DB00822	disulfiram	1.34e-05	PC3	0	0.02	0.148418
2054		atropine oxide	1.18e-05	PC3	0	0.05	0.180902
2055	DB01114	chlorphenamine	1.02e-05	PC3	0	0.04	0.173665
2056	DB08943	isoconazole	9.6e-06	PC3	0	0.03	0.165162
2057	DB01190	clindamycin	8.6e-06	PC3	0	0.02	0.148418
2058	DB00699	nicergoline	8.2e-06	PC3	0	0.04	0.173665
2059	DB00483	gallamine triethiodide	4.4e-06	PC3	0	0.01	0.122984
2060	DB01424	aminophenazone	1.72e-05	PC3	0	0.01	0.122984
2061		acetylsalicylsalicylic acid	1.34e-05	PC3	0	0.04	0.173665
2062	DB04821	nomifensine	1.12e-05	PC3	0	0.01	0.122984
2063	DB00844	nalbuphine	1.02e-05	PC3	0	0.01	0.122984
2064	DB00421	spironolactone	9.6e-06	PC3	0	0.06	0.187021
2065	DB09015	canrenoic acid	1e-05	PC3	0	0.03	0.165162
2066	DB00994	neomycin	4.2e-06	PC3	0	0.02	0.148418
2067	DB15588	ursolic acid	8.8e-06	PC3	0	0.02	0.148418
2068	DB06148	mianserin	1.32e-05	PC3	0	0.03	0.165162
2069		dizocilpine	1.18e-05	PC3	0	0.04	0.173665
2070	DB13327	picotamide	1.02e-05	PC3	0	0.04	0.173665
2071	DB00670	pirenzepine	9.4e-06	PC3	0	0.06	0.187021
2072	DB00493	cefotaxime	8.4e-06	PC3	0	0.09	0.203033
2073	DB01622	thioproperazine	6.2e-06	PC3	0	0.1	0.207695
2074	DB11512	dihydrostreptomycin	2.8e-06	PC3	0	0.07	0.193563
2075	DB00960	pindolol	1.62e-05	PC3	0	0.07	0.193563
2076	DB08313	nocodazole	1.32e-05	PC3	0	0.04	0.173665
2077	DB01418	acenocoumarol	1.14e-05	PC3	0	0.05	0.180902
2078	DB00620	triamcinolone	1.02e-05	PC3	0	0.02	0.148418
2079	DB01234	dexamethasone	9.2e-06	PC3	0	0.05	0.180902
2080	DB00759	tetracycline	8.4e-06	PC3	0	0.04	0.173665
2082	DB00798	gentamicin	2.6e-06	PC3	0	0.09	0.203033
2083	DB00951	isoniazid	2.92e-05	PC3	0	0.09	0.203033
2084		trichostatin A	1e-07	PC3	0	0.04	0.173665
2085	DB00302	tranexamic acid	2.54e-05	PC3	0	0.05	0.180902
2086		ampyrone	1.96e-05	PC3	0	0.09	0.203033
2087	DB00211	midodrine	1.38e-05	PC3	0	0.08	0.197251
2088	DB00863	ranitidine	1.14e-05	PC3	0	0.05	0.180902
2089	DB00554	piroxicam	1.2e-05	PC3	0	0.03	0.165162
2090	DB01059	norfloxacin	1.26e-05	PC3	0	0.05	0.180902
2091	DB00749	etodolac	1.4e-05	PC3	0	0.06	0.187021
2092	DB13415	pentetrazol	2.9e-05	PC3	0	0.06	0.187021
2093		etofylline	1.78e-05	PC3	0	0.03	0.165162
2094	DB00848	levamisole	1.66e-05	PC3	0	0.04	0.173665
2095	DB01041	thalidomide	1.54e-05	PC3	0	0.01	0.122984
2096	DB03604	tiratricol	6.4e-06	PC3	0	0.05	0.180902
2097	DB11156	pyrantel	1.12e-05	PC3	0	0.05	0.180902
2099		scopolamine N-oxide	1e-05	PC3	0	0.04	0.173665
2100	DB00356	chlorzoxazone	2.36e-05	PC3	0	0.02	0.148418
2101	DB00752	tranylcypromine	2.36e-05	PC3	0	0.06	0.187021
2103	DB13627	oxolinic acid	1.54e-05	PC3	0	0.04	0.173665
2104	DB02266	flufenamic acid	1.42e-05	PC3	0	0.04	0.173665
2106	DB08979	fenspiride	1.34e-05	PC3	0	0.08	0.197251
2107	DB06694	xylometazoline	1.42e-05	PC3	0	0.04	0.173665
2108	DB00424	hyoscyamine	1.38e-05	PC3	0	0.07	0.193563
2111	DB00423	methocarbamol	1.66e-05	PC3	0	0.01	0.122984
2112	DB04743	nimesulide	1.3e-05	PC3	0	0.07	0.193563
2113	DB01241	gemfibrozil	1.6e-05	PC3	0	0.05	0.180902
2114	DB00935	oxymetazoline	1.34e-05	PC3	0	0.07	0.193563
2115	DB00856	chlorphenesin	1.62e-05	PC3	0	0.05	0.180902
2116	DB00593	ethosuximide	2.84e-05	PC3	0	0.04	0.173665
2117	DB06736	aceclofenac	1.12e-05	PC3	0	0.05	0.180902
2118	DB00355	aztreonam	9.2e-06	PC3	0	0.04	0.173665
2119		hydrastinine	1.64e-05	PC3	0	0.06	0.187021
2121		mefexamide	1.26e-05	PC3	0	0.02	0.148418
2122	DB13407	nifenazone	1.3e-05	PC3	0	0.07	0.193563
2124	DB06795	mafenide	1.8e-05	PC3	0	0.08	0.197251
2125	DB04818	iproniazid	1.44e-05	PC3	0	0.1	0.207695
2127	DB00806	pentoxifylline	1.44e-05	PC3	0	0.08	0.197251
2128	DB00939	meclofenamic acid	1.18e-05	PC3	0	0.06	0.187021
2132	DB11477	xylazine	1.82e-05	HL60	0	0.09	0.203033
2133		cinchonine	1.36e-05	HL60	0	0.1	0.207695
2134	DB06727	sparteine	1.7e-05	HL60	0	0.11	0.210213
2135		conessine	1.12e-05	HL60	0	0.08	0.197251
2137		trichostatin A	1e-07	HL60	0	0.15	0.21765
2138		palmatine	1.04e-05	HL60	0	0.14	0.215059
2140		seneciphylline	1.2e-05	HL60	0	0.09	0.203033
2141	DB01833	canavanine	1.36e-05	HL60	0	0.03	0.165162
2143		gramine	2.3e-05	HL60	0	0.1	0.207695
2145	DB13393	emetine	7.2e-06	HL60	0	0.16	0.221768
2146		trimethylcolchicinic acid	1.16e-05	HL60	0	0.13	0.214035
2147		yohimbic acid	1.12e-05	HL60	0	0.1	0.207695
2148		boldine	1.22e-05	HL60	0	0.11	0.210213
2151	DB13683	quinisocaine	1.3e-05	HL60	0	0.07	0.193563
2152		solanine	4.6e-06	HL60	0	0.12	0.210647
2154	DB00222	glimepiride	8.2e-06	HL60	0	0.11	0.210213
2156	DB00378	dydrogesterone	1.28e-05	HL60	0	0.12	0.210647
2158	DB00376	trihexyphenidyl	1.18e-05	HL60	0	0.09	0.203033
2161		picrotoxinin	1.36e-05	HL60	0	0.03	0.165162
2164		Prestwick-682	6e-06	HL60	0	0.15	0.21765
2165		Prestwick-692	7.4e-06	HL60	0	0.12	0.210647
2166	DB13580	succinylsulfathiazole	1.12e-05	HL60	0	0.05	0.180902
2171		eldeline	7.8e-06	HL60	0	0.06	0.187021
2172		pempidine	1.3e-05	HL60	0	0.09	0.203033
2173	DB00420	promazine	1.24e-05	HL60	0	0.07	0.193563
2174		famprofazone	1.06e-05	HL60	0	0.13	0.214035
2175	DB04817	metamizole sodium	1.2e-05	HL60	0	0.06	0.187021
2176	DB13442	citiolone	2.52e-05	HL60	0	0.05	0.180902
2177	DB11748	benfotiamine	8.6e-06	HL60	0	0.09	0.203033
2178		Prestwick-664	8.4e-06	HL60	0	0.14	0.215059
2179		Prestwick-674	1.44e-05	HL60	0	0.1	0.207695
2180		heliotrine	1.28e-05	HL60	0	0.09	0.203033
2184	DB00846	fludroxycortide	9.2e-06	HL60	0	0.08	0.197251
2186		Prestwick-665	1.16e-05	HL60	0	0.12	0.210647
2187		Prestwick-675	1e-05	HL60	0	0.06	0.187021
2188		Prestwick-685	1.06e-05	HL60	0	0.16	0.221768
2189		acacetin	1.4e-05	HL60	0	0.17	0.225337
2190		methylbenzethonium chloride	8.6e-06	HL60	0	0.13	0.214035
2192		helveticoside	7.4e-06	HL60	0	0.17	0.225337
2193	DB13467	lanatoside C	4e-06	HL60	0	0.13	0.214035
2195		lycorine	1.24e-05	HL60	0	0.13	0.214035
2198	DB09345	pramocaine	1.22e-05	HL60	0	0.14	0.215059
2199		myosmine	2.74e-05	HL60	0	0.09	0.203033
2200		benzamil	1.12e-05	HL60	0	0.08	0.197251
2201		foliosidine	1.3e-05	HL60	0	0.09	0.203033
2203		karakoline	1.06e-05	HL60	0	0.13	0.214035
2204		etiocholanolone	1.38e-05	HL60	0	0.12	0.210647
2205	DB01146	diphenylpyraline	1.26e-05	HL60	0	0.14	0.215059
2208		trichostatin A	1e-07	HL60	0	0.13	0.214035
2209	DB00704	naltrexone	9.6e-06	MCF7	0	0.13	0.214035
2213	DB00602	ivermectin	4.6e-06	MCF7	0	0.17	0.225337
2214	DB01119	diazoxide	1.74e-05	MCF7	0	0.16	0.221768
2215	DB00822	disulfiram	1.34e-05	MCF7	0	0.11	0.210213
2216		atropine oxide	1.18e-05	MCF7	0	0.1	0.207695
2217	DB01114	chlorphenamine	1.02e-05	MCF7	0	0.05	0.180902
2219	DB01190	clindamycin	8.6e-06	MCF7	0	0.13	0.214035
2220	DB00699	nicergoline	8.2e-06	MCF7	0	0.15	0.21765
2221	DB00483	gallamine triethiodide	4.4e-06	MCF7	0	0.15	0.21765
2222	DB01424	aminophenazone	1.72e-05	MCF7	0	0.16	0.221768
2223		acetylsalicylsalicylic acid	1.34e-05	MCF7	0	0.09	0.203033
2225	DB00844	nalbuphine	1.02e-05	MCF7	0	0.16	0.221768
2226	DB00421	spironolactone	9.6e-06	MCF7	0	0.14	0.215059
2227	DB00342	terfenadine	8.4e-06	MCF7	0	0.1	0.207695
2228	DB09015	canrenoic acid	1e-05	MCF7	0	0.1	0.207695
2229	DB00994	neomycin	4.2e-06	MCF7	0	0.11	0.210213
2231	DB06148	mianserin	1.32e-05	MCF7	0	0.16	0.221768
2233	DB13327	picotamide	1.02e-05	MCF7	0	0.14	0.215059
2235	DB00493	cefotaxime	8.4e-06	MCF7	0	0.18	0.230769
2236	DB01622	thioproperazine	6.2e-06	MCF7	0	0.1	0.207695
2237	DB11512	dihydrostreptomycin	2.8e-06	MCF7	0	0.17	0.225337
2238	DB00960	pindolol	1.62e-05	MCF7	0	0.1	0.207695
2239	DB08313	nocodazole	1.32e-05	MCF7	0	0.13	0.214035
2241	DB00620	triamcinolone	1.02e-05	MCF7	0	0.13	0.214035
2242	DB01234	dexamethasone	9.2e-06	MCF7	0	0.18	0.230769
2243	DB00759	tetracycline	8.4e-06	MCF7	0	0.21	0.249951
2244	DB00320	dihydroergotamine	3e-06	MCF7	0	0.15	0.21765
2245	DB00798	gentamicin	2.6e-06	MCF7	0	0.09	0.203033
2246	DB00951	isoniazid	2.92e-05	MCF7	0	0.17	0.225337
2247		trichostatin A	1e-07	MCF7	0	0.19	0.235953
2248	DB00302	tranexamic acid	2.54e-05	MCF7	0	0.17	0.225337
2249		ampyrone	1.96e-05	MCF7	0	0.2	0.242304
2250	DB00211	midodrine	1.38e-05	MCF7	0	0.14	0.215059
2251	DB00863	ranitidine	1.14e-05	MCF7	0	0.13	0.214035
2252	DB00554	piroxicam	1.2e-05	MCF7	0	0.13	0.214035
2253	DB01059	norfloxacin	1.26e-05	MCF7	0	0.23	0.26734
2254	DB00749	etodolac	1.4e-05	MCF7	0	0.15	0.21765
2256		etofylline	1.78e-05	MCF7	0	0.2	0.242304
2259	DB03604	tiratricol	6.4e-06	MCF7	0	0.1	0.207695
2261		antimycin A	7.2e-06	MCF7	0	0.12	0.210647
2262		scopolamine N-oxide	1e-05	MCF7	0	0.09	0.203033
2263	DB00356	chlorzoxazone	2.36e-05	MCF7	0	0.15	0.21765
2264	DB00752	tranylcypromine	2.36e-05	MCF7	0	0.12	0.210647
2265	DB01626	pargyline	2.04e-05	MCF7	0	0.15	0.21765
2266	DB13627	oxolinic acid	1.54e-05	MCF7	0	0.15	0.21765
2267	DB02266	flufenamic acid	1.42e-05	MCF7	0	0.07	0.193563
2269	DB08979	fenspiride	1.34e-05	MCF7	0	0.17	0.225337
2272	DB13026	ornidazole	1.82e-05	MCF7	0	0.15	0.21765
2274	DB00423	methocarbamol	1.66e-05	MCF7	0	0.15	0.21765
2276	DB08972	flumequine	1.54e-05	MCF7	0	0.18	0.230769
2277	DB01241	gemfibrozil	1.6e-05	MCF7	0	0.18	0.230769
2278	DB00935	oxymetazoline	1.34e-05	MCF7	0	0.14	0.215059
2279	DB00856	chlorphenesin	1.62e-05	MCF7	0	0.19	0.235953
2280	DB00593	ethosuximide	2.84e-05	MCF7	0	0.14	0.215059
2281	DB06736	aceclofenac	1.12e-05	MCF7	0	0.16	0.221768
2282	DB00355	aztreonam	9.2e-06	MCF7	0	0.14	0.215059
2283		hydrastinine	1.64e-05	MCF7	0	0.14	0.215059
2284		mefexamide	1.26e-05	MCF7	0	0.2	0.242304
2285	DB13407	nifenazone	1.3e-05	MCF7	0	0.2	0.242304
2286	DB13836	metampicillin	1.04e-05	MCF7	0	0.19	0.235953
2287	DB06795	mafenide	1.8e-05	MCF7	0	0.21	0.249951
2288	DB04818	iproniazid	1.44e-05	MCF7	0	0.19	0.235953
2289	DB01147	cloxacillin	8.8e-06	MCF7	0	0.17	0.225337
2290	DB00806	pentoxifylline	1.44e-05	MCF7	0	0.17	0.225337
2291	DB00939	meclofenamic acid	1.18e-05	MCF7	0	0.18	0.230769
2292	DB13025	tiapride	1.1e-05	MCF7	0	0.09	0.203033
2293	DB00400	griseofulvin	1.12e-05	MCF7	0	0.17	0.225337
2294	DB13715	dilazep	6e-06	MCF7	0	0.16	0.221768
2295	DB00740	riluzole	1.48e-05	MCF7	0	0.16	0.221768
2296	DB01015	sulfamethoxazole	1.58e-05	MCF7	0	0.16	0.221768
2297	DB00779	nalidixic acid	1.46e-05	MCF7	0	0.12	0.210647
2299		kawain	1.74e-05	MCF7	0	0.22	0.258127
2300	DB00643	mebendazole	1.36e-05	MCF7	0	0.14	0.215059
2301		clemizole	1.1e-05	MCF7	0	0.08	0.197251
2302	DB01165	ofloxacin	1.1e-05	MCF7	0	0.06	0.187021
2303	DB00698	nitrofurantoin	1.68e-05	MCF7	0	0.18	0.230769
2304	DB13583	mephenesin	2.2e-05	MCF7	0	0.15	0.21765
2307	DB00440	trimethoprim	1.38e-05	MCF7	0	0.1	0.207695
2308	DB08981	fenbufen	1.58e-05	MCF7	0	0.2	0.242304
2311	DB01275	hydralazine	2.04e-05	MCF7	0	0.12	0.210647
2312	DB00914	phenformin	1.66e-05	MCF7	0	0.16	0.221768
2313		6-benzylaminopurine	1.78e-05	MCF7	0	0.19	0.235953
2314	DB00750	prilocaine	1.56e-05	MCF7	0	0.12	0.210647
2315	DB01233	metoclopramide	1.18e-05	MCF7	0	0.15	0.21765
2316	DB01009	ketoprofen	1.58e-05	MCF7	0	0.11	0.210213
2317	DB12293	nefopam	1.38e-05	MCF7	0	0.17	0.225337
2318	DB01173	orphenadrine	1.3e-05	MCF7	0	0.11	0.210213
2319	DB00780	phenelzine	1.7e-05	MCF7	0	0.17	0.225337
2321	DB04690	camptothecin	1.14e-05	MCF7	0	0.13	0.214035
2322	DB00808	indapamide	1.06e-05	MCF7	0	0.13	0.214035
2324	DB00379	mexiletine	1.86e-05	MCF7	0	0.17	0.225337
2326		ethisterone	1.28e-05	MCF7	0	0.26	0.297394
2327	DB13374	vincamine	1.12e-05	MCF7	0	0.13	0.214035
2328	DB00687	fludrocortisone	9.4e-06	MCF7	0	0.18	0.230769
2329	DB01219	dantrolene	1.18e-05	MCF7	0	0.2	0.242304
2330		trichostatin A	1e-07	MCF7	0	0.16	0.221768
2331	DB13025	tiapride	1.1e-05	HL60	0	0.02	0.148418
2332	DB00400	griseofulvin	1.12e-05	HL60	0	0.07	0.193563
2333	DB13715	dilazep	6e-06	HL60	0	0.01	0.122984
2335	DB01015	sulfamethoxazole	1.58e-05	HL60	0	0.02	0.148418
2337		kawain	1.74e-05	HL60	0	0.08	0.197251
2339		clemizole	1.1e-05	HL60	0	0.03	0.165162
2341	DB00698	nitrofurantoin	1.68e-05	HL60	0	0.05	0.180902
2342	DB13583	mephenesin	2.2e-05	HL60	0	0.05	0.180902
2343	DB01090	pentolonium	7.4e-06	HL60	0	0.05	0.180902
2345	DB00440	trimethoprim	1.38e-05	HL60	0	0.07	0.193563
2347	DB00809	tropicamide	1.4e-05	HL60	0	0.06	0.187021
2348	DB00978	lomefloxacin	1.04e-05	HL60	0	0.07	0.193563
2350	DB00914	phenformin	1.66e-05	HL60	0	0.1	0.207695
2351		6-benzylaminopurine	1.78e-05	HL60	0	0.06	0.187021
2354	DB01009	ketoprofen	1.58e-05	HL60	0	0.04	0.173665
2355	DB12293	nefopam	1.38e-05	HL60	0	0.04	0.173665
2356	DB01173	orphenadrine	1.3e-05	HL60	0	0.03	0.165162
2357	DB00780	phenelzine	1.7e-05	HL60	0	0.05	0.180902
2358	DB00499	flutamide	1.44e-05	HL60	0	0.06	0.187021
2359	DB01124	tolbutamide	1.48e-05	HL60	0	0.04	0.173665
2362	DB00692	phentolamine	1.26e-05	HL60	0	0.01	0.122984
2363	DB13431	proglumide	1.2e-05	HL60	0	0.09	0.203033
2364	DB00379	mexiletine	1.86e-05	HL60	0	0.05	0.180902
2366		ethisterone	1.28e-05	HL60	0	0.09	0.203033
2369	DB01219	dantrolene	1.18e-05	HL60	0	0.08	0.197251
2370		trichostatin A	1e-07	HL60	0	0.17	0.225337
2371	DB00722	lisinopril	9e-06	HL60	0	0.04	0.173665
2372	DB08954	ifenprodil	8.4e-06	HL60	0	0.08	0.197251
2374	DB01231	difenidol	1.16e-05	HL60	0	0.04	0.173665
2375		trichostatin A	1e-07	HL60	0	0.13	0.214035
2376	DB00427	triprolidine	1.28e-05	HL60	0	0.07	0.193563
2379	DB00656	trazodone	9.8e-06	HL60	0	0.07	0.193563
2381	DB04841	flunarizine	8.4e-06	HL60	0	0.06	0.187021
2383	DB00717	norethisterone	1.34e-05	HL60	0	0.12	0.210647
2384	DB01142	doxepin	1.26e-05	HL60	0	0.12	0.210647
2386		homochlorcyclizine	1.04e-05	HL60	0	0.08	0.197251
2387		glafenine	9.8e-06	HL60	0	0.09	0.203033
2388		telenzepine	9e-06	HL60	0	0.05	0.180902
2389	DB00831	trifluoperazine	8.4e-06	HL60	0	0.06	0.187021
2391	DB00540	nortriptyline	1.34e-05	HL60	0	0.09	0.203033
2392	DB00645	dyclonine	1.22e-05	HL60	0	0.08	0.197251
2394	DB00711	diethylcarbamazine	1.02e-05	HL60	0	0.05	0.180902
2395	DB13292	pimethixene	9.8e-06	HL60	0	0.1	0.207695
2396	DB01127	econazole	9e-06	HL60	0	0.13	0.214035
2398	DB13785	dropropizine	1.7e-05	HL60	0	0.08	0.197251
2399	DB04552	niflumic acid	1.42e-05	HL60	0	0.17	0.225337
2400	DB00985	dimenhydrinate	8.6e-06	HL60	0	0.08	0.197251
2401	DB01039	fenofibrate	1.1e-05	HL60	0	0.11	0.210213
2404	DB00297	bupivacaine	1.24e-05	HL60	0	0.1	0.207695
2405	DB01017	minocycline	8e-06	HL60	0	0.06	0.187021
2406	DB06762	pinacidil	1.64e-05	HL60	0	0.04	0.173665
2408	DB00280	disopyramide	1.18e-05	HL60	0	0.07	0.193563
2409	DB00887	bumetanide	1.1e-05	HL60	0	0.1	0.207695
2410	DB01074	perhexiline	1.02e-05	HL60	0	0.08	0.197251
2411	DB13783	acemetacin	9.6e-06	HL60	0	0.14	0.215059
2423	DB00390	digoxin	5.2e-06	HL60	0	0.11	0.210213
2425		naringin	6.6e-06	HL60	0	0.09	0.203033
2426	DB00396	progesterone	1.28e-05	HL60	0	0.12	0.210647
2428	DB00121	biotin	1.64e-05	HL60	0	0.09	0.203033
2430		velnacrine	1.22e-05	HL60	0	0.06	0.187021
2431	DB01065	melatonin	1.72e-05	HL60	0	0.12	0.210647
2432	DB01400	neostigmine bromide	1.32e-05	HL60	0	0.05	0.180902
2433	DB01023	felodipine	1.04e-05	HL60	0	0.05	0.180902
2434	DB01118	amiodarone	5.8e-06	HL60	0	0.04	0.173665
2435	DB09020	bisacodyl	1.1e-05	HL60	0	0.06	0.187021
2436	DB00169	colecalciferol	1.04e-05	HL60	0	0.11	0.210213
2440	DB13661	niridazole	1.86e-05	HL60	0	0.05	0.180902
2444		epiandrosterone	1.38e-05	HL60	0	0.15	0.21765
2445	DB00485	dicloxacillin	8.2e-06	HL60	0	0.07	0.193563
2446	DB12789	dinoprost	8.4e-06	HL60	0	0.17	0.225337
2447	DB00923	ceforanide	7.6e-06	HL60	0	0.12	0.210647
2449	DB08839	serotonin	1.88e-05	HL60	0	0.12	0.210647
2452	DB01080	vigabatrin	3.1e-05	HL60	0	0.16	0.221768
2454	DB02691	glycocholic acid	8.6e-06	HL60	0	0.09	0.203033
2455		pirenperone	1.02e-05	HL60	0	0.1	0.207695
2457	DB08958	hexetidine	1.18e-05	HL60	0	0.12	0.210647
2461	DB01362	iohexol	4.8e-06	HL60	0	0.12	0.210647
2462	DB11467	thiostrepton	2.4e-06	HL60	0	0.13	0.214035
2463		salsolidin	1.64e-05	HL60	0	0.08	0.197251
2464	DB01032	probenecid	1.4e-05	HL60	0	0.09	0.203033
2465	DB01037	selegiline	1.78e-05	HL60	0	0.06	0.187021
2466		6-azathymine	3.14e-05	HL60	0	0.07	0.193563
2467	DB00338	omeprazole	1.16e-05	HL60	0	0.04	0.173665
2468	DB00341	cetirizine	8.6e-06	HL60	0	0.08	0.197251
2469		norcyclobenzaprine	1.54e-05	HL60	0	0.08	0.197251
2471	DB03783	phenacetin	2.24e-05	HL60	0	0.1	0.207695
2472	DB06698	betahistine	1.72e-05	HL60	0	0.07	0.193563
2473	DB00738	pentamidine	6.8e-06	HL60	0	0.06	0.187021
2474		trichostatin A	1e-07	HL60	0	0.21	0.249951
2476	DB00550	propylthiouracil	2.34e-05	HL60	0	0.08	0.197251
2477		etifenin	1.24e-05	HL60	0	0.07	0.193563
2479	DB00730	tiabendazole	1.98e-05	HL60	0	0.1	0.207695
2480	DB01117	atovaquone	1.1e-05	HL60	0	0.16	0.221768
2481	DB00684	tobramycin	8.6e-06	HL60	0	0.1	0.207695
2482	DB00839	tolazamide	1.28e-05	HL60	0	0.08	0.197251
2483	DB00833	cefaclor	1.04e-05	HL60	0	0.08	0.197251
2484	DB00251	terconazole	7.6e-06	HL60	0	0.08	0.197251
2486	DB00347	trimethadione	2.8e-05	HL60	0	0.13	0.214035
2488	DB00723	methoxamine	1.62e-05	HL60	0	0.13	0.214035
2491	DB00803	colistin	3e-06	HL60	0	0.12	0.210647
2492	DB01600	tiaprofenic acid	1.54e-05	HL60	0	0.07	0.193563
2495	DB00609	ethionamide	2.4e-05	HL60	0	0.07	0.193563
2497	DB02789	pregnenolone	1.26e-05	HL60	0	0.15	0.21765
2501	DB00469	tenoxicam	1.18e-05	HL60	0	0.17	0.225337
2504		skimmianine	1.54e-05	HL60	0	0.13	0.214035
2506	DB04574	estropipate	9.2e-06	HL60	0	0.08	0.197251
2508	DB11125	benzethonium chloride	9e-06	HL60	0	0.14	0.215059
2509	DB00324	fluorometholone	1.06e-05	HL60	0	0.07	0.193563
2510	DB12736	etanidazole	1.86e-05	HL60	0	0.12	0.210647
2511	DB11336	kinetin	1.86e-05	HL60	0	0.09	0.203033
2512		anabasine	2.46e-05	HL60	0	0.11	0.210213
2514		Prestwick-689	1.02e-05	HL60	0	0.15	0.21765
2515	DB07931	hexestrol	1.48e-05	HL60	0	0.07	0.193563
[truncated: 4,101 more rows]

## Sheet: scDAMNET_GSE98969
Instance ID in the Cmap database	DrugBank ID	Drug Name	Drug Dose in Cmap database	Cell lines in Cmap database	Eneichment Score (ES)	P-value	adjusted p-value (FDR)
5327	DB09022	benfluorex	1.04e-05	MCF7	0.755586	0	0
4763		karakoline	1.06e-05	MCF7	0.676446	0	0
2021	DB00434	cyproheptadine	1.24e-05	HL60	0.673105	0.01	0.1525
2671	DB00755	tretinoin	1e-06	HL60	0.671307	0	0
7428	DB00584	enalapril	8.2e-06	MCF7	0.667129	0.02	0.177068
1650	DB05134	tanespimycin	1e-06	MCF7	0.667086	0	0
982		depudecin	1e-06	MCF7	0.661334	0.01	0.1525
1887	DB00391	sulpiride	1.18e-05	PC3	0.661115	0	0
6997	DB00947	fulvestrant	1e-08	MCF7	0.659162	0.01	0.1525
5236	DB02656	LY-294002	1e-05	MCF7	0.653416	0	0
4838	DB01056	tocainide	1.74e-05	MCF7	0.652426	0	0
632	DB01051	novobiocin	0.0001	SKMEL5	0.651666	0	0
5276		3-hydroxy-DL-kynurenine	1.78e-05	MCF7	0.641605	0	0
7302	DB00955	netilmicin	2.8e-06	PC3	0.639555	0	0
1869	DB00788	naproxen	1.74e-05	HL60	0.63494	0.02	0.177068
7002	DB08059	wortmannin	1e-08	MCF7	0.634439	0.02	0.177068
3815	DB00763	thiamazole	3.5e-05	PC3	0.629136	0	0
3984		pronetalol	1.5e-05	PC3	0.62862	0	0
7330	DB07814	gibberellic acid	1.16e-05	MCF7	0.626565	0.02	0.177068
6278	DB13766	lidoflazine	8.2e-06	MCF7	0.62654	0	0
5241	DB00502	haloperidol	1e-05	MCF7	0.626379	0	0
4827	DB13393	emetine	7.2e-06	MCF7	0.625001	0	0
2142	DB00223	diflorasone	8e-06	HL60	0.622487	0	0
2006	DB01183	naloxone	1.1e-05	HL60	0.620909	0.03	0.18866
3969		0317956-0000	1e-06	MCF7	0.618276	0	0
5270		thioperamide	9.8e-06	MCF7	0.61325	0.01	0.1525
5280	DB00373	timolol	9.2e-06	MCF7	0.612576	0	0
2778		alpha-yohimbine	1.02e-05	MCF7	0.611784	0	0
862		5230742	1.7e-05	MCF7	0.60954	0.02	0.177068
3739		foliosidine	1.3e-05	PC3	0.608046	0	0
1980	DB00249	idoxuridine	1.12e-05	HL60	0.605456	0	0
3351		(+/-)-catechin	1.38e-05	MCF7	0.602058	0	0
1906	DB00999	hydrochlorothiazide	1.34e-05	PC3	0.599386	0.03	0.18866
7431	DB00985	dimenhydrinate	8.6e-06	MCF7	0.598902	0.04	0.203164
7099		0198306-0000	1e-05	MCF7	0.598779	0	0
5336		trichostatin A	1e-07	MCF7	0.59723	0.01	0.1525
1723	DB12401	bromperidol	9.6e-06	HL60	0.596876	0.02	0.177068
2276	DB08972	flumequine	1.54e-05	MCF7	0.596776	0	0
5230	DB00412	rosiglitazone	1e-05	MCF7	0.596185	0.01	0.1525
1408	DB13415	pentetrazol	2.9e-05	HL60	0.595329	0.01	0.1525
1183	DB00877	sirolimus	1e-07	HL60	0.595021	0.04	0.203164
1982	DB08960	hexamethonium bromide	1e-05	HL60	0.594645	0.02	0.177068
1891		trichostatin A	1e-07	PC3	0.592295	0.03	0.18866
564		15-delta prostaglandin J2	1e-05	SKMEL5	0.592057	0.02	0.177068
2001	DB00525	tolnaftate	1.3e-05	HL60	0.589498	0.05	0.210781
7472	DB00856	chlorphenesin	1.62e-05	MCF7	0.58942	0.01	0.1525
2961		S-propranolol	1.36e-05	HL60	0.589206	0.01	0.1525
2368	DB00687	fludrocortisone	9.4e-06	HL60	0.588797	0.03	0.18866
3627	DB12293	nefopam	1.38e-05	MCF7	0.587643	0	0
2160		Prestwick-642	1.38e-05	HL60	0.587485	0.02	0.177068
2370		trichostatin A	1e-07	HL60	0.586972	0	0
7394	DB01326	cefamandole	8.2e-06	PC3	0.586261	0.01	0.1525
7442	DB13783	acemetacin	9.6e-06	MCF7	0.58431	0.05	0.210781
1495	DB13726	sulfaguanidine	1.86e-05	MCF7	0.584277	0.02	0.177068
1860	DB09371	noretynodrel	1.34e-05	HL60	0.584013	0.02	0.177068
7233		ramifenazone	1.42e-05	MCF7	0.583782	0	0
3315	DB02691	glycocholic acid	8.6e-06	MCF7	0.583211	0.03	0.18866
4446	DB00313	valproic acid	5e-05	PC3	0.581804	0	0
3784	DB13374	vincamine	1.12e-05	PC3	0.581306	0	0
4948		Prestwick-984	9.2e-06	MCF7	0.579386	0.03	0.18866
7440	DB00887	bumetanide	1.1e-05	MCF7	0.577717	0.02	0.177068
2040	DB00850	perphenazine	1e-05	HL60	0.577191	0.06	0.213162
1547	DB00518	albendazole	1.5e-05	HL60	0.57585	0.03	0.18866
4978	DB00227	lovastatin	9.8e-06	MCF7	0.57444	0	0
1912	DB13720	diphemanil metilsulfate	1.02e-05	PC3	0.573134	0.03	0.18866
1735	DB11389	clorsulon	1.06e-05	HL60	0.572977	0.05	0.210781
4015	DB00376	trihexyphenidyl	1.18e-05	PC3	0.572635	0.02	0.177068
3359	DB01203	nadolol	1.3e-05	MCF7	0.571667	0.01	0.1525
2143		gramine	2.3e-05	HL60	0.571495	0.01	0.1525
4005	DB00870	suprofen	1.54e-05	PC3	0.570567	0	0
1607	DB00353	methylergometrine	8.8e-06	HL60	0.57042	0.01	0.1525
3304	DB00153	ergocalciferol	1e-05	MCF7	0.570217	0.01	0.1525
1469	DB00527	cinchocaine	1.16e-05	MCF7	0.569895	0.02	0.177068
7235	DB01246	alimemazine	5.4e-06	MCF7	0.56952	0.02	0.177068
909		HC toxin	1e-07	MCF7	0.56942	0.03	0.18866
5861	DB00586	diclofenac	1.26e-05	PC3	0.568438	0.02	0.177068
1966	DB06711	naphazoline	1.62e-05	HL60	0.568361	0	0
6220		cicloheximide	1.42e-05	MCF7	0.566763	0.01	0.1525
4011	DB13867	fluticasone	8e-06	PC3	0.564253	0	0
5362	DB00665	nilutamide	1.26e-05	MCF7	0.564201	0.03	0.18866
3879	DB11064	homosalate	1.52e-05	MCF7	0.563065	0.01	0.1525
7166		tomatidine	9.6e-06	MCF7	0.561842	0.02	0.177068
5452	DB01168	procarbazine	1.56e-05	MCF7	0.561456	0	0
5279	DB00810	biperiden	1.14e-05	MCF7	0.560249	0.02	0.177068
5402	DB13792	clopamide	1.16e-05	MCF7	0.560213	0	0
1180	DB02656	LY-294002	1e-05	HL60	0.558955	0.01	0.1525
5206	DB00313	valproic acid	0.001	MCF7	0.55827	0.01	0.1525
2742		sulfamonomethoxine	1.42e-05	HL60	0.55779	0	0
1072		trichostatin A	1e-06	MCF7	0.557656	0.03	0.18866
3362	DB01249	iodixanol	2.6e-06	MCF7	0.557282	0	0
4976	DB01193	acebutolol	1.08e-05	MCF7	0.557179	0.02	0.177068
4577	DB00635	prednisone	1.12e-05	PC3	0.554455	0	0
7228	DB01058	praziquantel	1.28e-05	MCF7	0.55436	0.03	0.18866
5598	DB00947	fulvestrant	1e-08	MCF7	0.554154	0.01	0.1525
3441	DB06150	sulfadimethoxine	1.28e-05	MCF7	0.553806	0.02	0.177068
1576	DB12554	mebeverine	8.6e-06	HL60	0.553153	0.02	0.177068
1688	DB00359	sulfadiazine	1.6e-05	MCF7	0.552871	0.02	0.177068
1588	DB04819	methapyrilene	1.34e-05	HL60	0.552385	0.01	0.1525
2015		metanephrine	1.72e-05	HL60	0.551912	0.04	0.203164
3484		sulfamonomethoxine	1.42e-05	MCF7	0.551296	0.03	0.18866
7353	DB01245	decamethonium bromide	9.6e-06	MCF7	0.551109	0.05	0.210781
5854	DB06707	corbadrine	2.18e-05	PC3	0.550572	0.01	0.1525
7429	DB13785	dropropizine	1.7e-05	MCF7	0.547982	0.05	0.210781
3891		lycorine	1.24e-05	MCF7	0.547671	0.01	0.1525
3876	DB00991	oxaprozin	1.36e-05	MCF7	0.546378	0	0
1968	DB00805	minaprine	1.08e-05	HL60	0.546335	0.01	0.1525
2000	DB00797	tolazoline	2.04e-05	HL60	0.545966	0.01	0.1525
2010	DB00199	erythromycin	5.4e-06	HL60	0.545794	0.05	0.210781
4684	DB00810	biperiden	1.14e-05	PC3	0.545573	0.01	0.1525
2489		tetramisole	1.66e-05	HL60	0.545552	0.02	0.177068
1496	DB00350	minoxidil	1.92e-05	MCF7	0.544648	0.05	0.210781
5741		fluorocurarine	1.16e-05	PC3	0.544443	0.01	0.1525
2526	DB01112	cefuroxime	9e-06	HL60	0.543771	0.01	0.1525
3801	DB01173	orphenadrine	1.3e-05	PC3	0.54364	0	0
2251	DB00863	ranitidine	1.14e-05	MCF7	0.542643	0.01	0.1525
6021	DB00806	pentoxifylline	1.44e-05	MCF7	0.542638	0.03	0.18866
2361	DB00808	indapamide	1.06e-05	HL60	0.541246	0	0
2708	DB00473	hexylcaine	1.34e-05	HL60	0.540886	0.04	0.203164
1184	DB08059	wortmannin	1e-08	HL60	0.540015	0.07	0.218414
2360	DB11410	fenbendazole	1.34e-05	HL60	0.53957	0.06	0.213162
4969	DB13216	oxolamine	9.2e-06	MCF7	0.539423	0.03	0.18866
5954		PF-00562151-00	1e-05	MCF7	0.539308	0	0
916	DB05134	tanespimycin	1e-06	MCF7	0.539113	0.03	0.18866
1730	DB08989	etamivan	1.8e-05	HL60	0.537896	0.01	0.1525
2155		vitexin	9.2e-06	HL60	0.537709	0.02	0.177068
2650		androsterone	1.38e-05	MCF7	0.536836	0.02	0.177068
1148	DB00877	sirolimus	1e-07	HL60	0.535133	0.03	0.18866
7421	DB00357	aminoglutethimide	1.72e-05	MCF7	0.535009	0.01	0.1525
3692		PNU-0251126	1e-06	PC3	0.534009	0	0
4785	DB00249	idoxuridine	1.12e-05	MCF7	0.532591	0.03	0.18866
4013	DB00835	brompheniramine	9.2e-06	PC3	0.532026	0.01	0.1525
1963	DB06147	sulfathiazole	1.56e-05	HL60	0.531856	0	0
7312	DB01605	pivmecillinam	8.4e-06	PC3	0.530459	0.08	0.223751
6719	DB06742	ambroxol	9.6e-06	PC3	0.52965	0	0
2776		aconitine	6.2e-06	MCF7	0.529539	0.03	0.18866
1739	DB09085	tetracaine	1.32e-05	HL60	0.529212	0.04	0.203164
7187	DB01162	terazosin	9.4e-06	MCF7	0.529086	0.02	0.177068
7437	DB06762	pinacidil	1.64e-05	MCF7	0.528994	0.08	0.223751
2974	DB00735	naftifine	1.24e-05	HL60	0.528316	0.02	0.177068
1509	DB00661	verapamil	8.2e-06	MCF7	0.528104	0.02	0.177068
7456	DB00356	chlorzoxazone	2.36e-05	MCF7	0.52776	0.03	0.18866
2144		protoveratrine A	5e-06	HL60	0.527398	0.04	0.203164
1485	DB08941	isoxsuprine	1.18e-05	MCF7	0.527125	0.04	0.203164
6730	DB01954	rolipram	1.46e-05	PC3	0.526825	0	0
2741	DB13242	bucladesine	7.8e-06	HL60	0.526784	0	0
1687	DB00774	hydroflumethiazide	1.2e-05	MCF7	0.526572	0.05	0.210781
6361	DB13783	acemetacin	9.6e-06	PC3	0.526102	0	0
7422	DB00540	nortriptyline	1.34e-05	MCF7	0.526061	0.07	0.218414
1527	DB13597	moroxydine	1.92e-05	MCF7	0.525955	0.04	0.203164
4997		velnacrine	1.22e-05	MCF7	0.525809	0.04	0.203164
5216		monorden	1e-07	MCF7	0.525322	0.05	0.210781
2485	DB00816	orciprenaline	7.6e-06	HL60	0.525106	0	0
6315	DB00457	prazosin	9.6e-06	PC3	0.52467	0.06	0.213162
5075		hydrastinine	1.64e-05	PC3	0.523762	0.01	0.1525
2711	DB00221	isoetarine	1.2e-05	HL60	0.523245	0.03	0.18866
7356	DB01624	zuclopenthixol	9.2e-06	MCF7	0.522845	0.03	0.18866
5876		convolamine	1.18e-05	PC3	0.522456	0.02	0.177068
6156	DB09203	oxedrine	2.4e-05	HL60	0.521789	0.01	0.1525
6950	DB00412	rosiglitazone	1e-05	MCF7	0.521313	0.02	0.177068
2884	DB11389	clorsulon	1.06e-05	MCF7	0.521276	0.04	0.203164
6263	DB13718	hydroquinine	9.4e-06	MCF7	0.521175	0.08	0.223751
4759		myosmine	2.74e-05	MCF7	0.521021	0.02	0.177068
4416	DB13720	diphemanil metilsulfate	1.02e-05	MCF7	0.520704	0.04	0.203164
5020	DB01158	bretylium tosilate	9.6e-06	MCF7	0.520384	0.03	0.18866
5494		hydrastinine	1.64e-05	MCF7	0.520199	0.07	0.218414
2103	DB13627	oxolinic acid	1.54e-05	PC3	0.520106	0.04	0.203164
1630	DB00947	fulvestrant	1e-06	MCF7	0.519664	0.06	0.213162
2253	DB01059	norfloxacin	1.26e-05	MCF7	0.519546	0.02	0.177068
6255	DB00421	spironolactone	9.6e-06	MCF7	0.51931	0.03	0.18866
4424		Prestwick-692	7.4e-06	MCF7	0.518933	0.01	0.1525
911	DB08059	wortmannin	1e-08	MCF7	0.518151	0.05	0.210781
7093		0316684-0000	1e-05	MCF7	0.517968	0.03	0.18866
1987	DB00999	hydrochlorothiazide	1.34e-05	HL60	0.517777	0.01	0.1525
2782		quipazine	9e-06	MCF7	0.517747	0.08	0.223751
7035	DB00280	disopyramide	1.18e-05	MCF7	0.516591	0.05	0.210781
1668	DB08059	wortmannin	1e-08	MCF7	0.516375	0.06	0.213162
4739		heliotrine	1.28e-05	MCF7	0.516173	0.04	0.203164
7386	DB00986	glycopyrronium bromide	1e-05	PC3	0.51575	0.06	0.213162
1153		trichostatin A	1e-07	HL60	0.514827	0.03	0.18866
4139	DB01203	nadolol	1.3e-05	MCF7	0.514774	0.02	0.177068
6249		DL-thiorphan	1.58e-05	MCF7	0.513829	0.04	0.203164
4764		etiocholanolone	1.38e-05	MCF7	0.513627	0.03	0.18866
6260	DB06148	mianserin	1.32e-05	MCF7	0.513597	0.07	0.218414
5399	DB00389	carbimazole	2.14e-05	MCF7	0.512993	0.02	0.177068
7352	DB00943	zalcitabine	1.9e-05	MCF7	0.512891	0.06	0.213162
7199	DB00920	ketotifen	9.4e-06	MCF7	0.512837	0.03	0.18866
1939	DB00537	ciprofloxacin	1.08e-05	PC3	0.512837	0.04	0.203164
5512		todralazine	1.48e-05	MCF7	0.512823	0.06	0.213162
2652		coralyne	9.6e-06	MCF7	0.512564	0.06	0.213162
542		SC-58125	1e-05	HL60	0.512074	0.12	0.242304
1817	DB00634	sulfacetamide	1.58e-05	PC3	0.51192	0.08	0.223751
1967	DB00391	sulpiride	1.18e-05	HL60	0.511546	0	0
1561		trichostatin A	1e-07	HL60	0.511497	0.03	0.18866
1428	DB04743	nimesulide	1.3e-05	HL60	0.511466	0.02	0.177068
3533	DB01168	procarbazine	1.56e-05	MCF7	0.510738	0.01	0.1525
6793	DB08313	nocodazole	1.32e-05	MCF7	0.510703	0.02	0.177068
5028	DB00589	lisuride	1.18e-05	MCF7	0.510404	0.04	0.203164
4752	DB12293	nefopam	1.38e-05	MCF7	0.510395	0.04	0.203164
5239	DB00877	sirolimus	1e-07	MCF7	0.510334	0.03	0.18866
3522	DB14075	imidurea	1.04e-05	MCF7	0.510092	0.02	0.177068
6357		Prestwick-1083	8.8e-06	PC3	0.509933	0.04	0.203164
5219	DB00313	valproic acid	5e-05	MCF7	0.509822	0.06	0.213162
3464		cicloheximide	1.42e-05	MCF7	0.509289	0.06	0.213162
2626		N6-methyladenosine	1.42e-05	MCF7	0.509228	0.04	0.203164
3811	DB09345	pramocaine	1.22e-05	PC3	0.508808	0.01	0.1525
5387	DB00661	verapamil	8.2e-06	MCF7	0.508157	0.05	0.210781
5210	DB12442	alvespimycin	1e-07	MCF7	0.507072	0.01	0.1525
6967	DB00877	sirolimus	1e-07	MCF7	0.506743	0.02	0.177068
5522	DB00832	phensuximide	2.12e-05	MCF7	0.506657	0.02	0.177068
3242		carcinine	2.2e-05	MCF7	0.506286	0.04	0.203164
1545	DB00589	lisuride	1.18e-05	MCF7	0.506259	0.04	0.203164
4735	DB11518	flunixin	8.2e-06	MCF7	0.506235	0.02	0.177068
1983	DB00804	dicycloverine	1.16e-05	HL60	0.50601	0.01	0.1525
6010	DB00384	triamterene	1.58e-05	MCF7	0.505827	0.04	0.203164
1472	DB01235	levodopa	2.02e-05	MCF7	0.505651	0.06	0.213162
4100	DB00662	trimethobenzamide	9.4e-06	PC3	0.505453	0.01	0.1525
2565	DB00986	glycopyrronium bromide	1e-05	HL60	0.505396	0.02	0.177068
3392		thioperamide	9.8e-06	MCF7	0.505201	0.03	0.18866
7155	DB09342	propoxycaine	1.2e-05	PC3	0.505029	0.04	0.203164
3875	DB01325	quinethazone	1.38e-05	MCF7	0.504837	0.02	0.177068
5415	DB01080	vigabatrin	3.1e-05	MCF7	0.504677	0.06	0.213162
5461	DB11636	nomegestrol	1.08e-05	MCF7	0.504618	0.03	0.18866
3201	DB13766	lidoflazine	8.2e-06	MCF7	0.503978	0	0
2412	DB00283	clemastine	8.6e-06	HL60	0.503915	0.05	0.210781
3223	DB01599	probucol	7.8e-06	MCF7	0.503719	0.03	0.18866
6819	DB00456	cefalotin	9.6e-06	MCF7	0.503366	0.07	0.218414
6976	DB02656	LY-294002	1e-07	MCF7	0.502668	0.07	0.218414
5465	DB01604	pivampicillin	8.6e-06	MCF7	0.502665	0.06	0.213162
7001	DB00877	sirolimus	1e-07	MCF7	0.502208	0.02	0.177068
6262	DB01061	azlocillin	8.2e-06	MCF7	0.502084	0.06	0.213162
6972		trichostatin A	1e-07	MCF7	0.501754	0.04	0.203164
3871	DB04820	nialamide	1.34e-05	MCF7	0.501202	0.04	0.203164
6218	DB09064	ciprofibrate	1.38e-05	MCF7	0.500981	0.06	0.213162
6053	DB08936	chlorcyclizine	1.18e-05	MCF7	0.500296	0.04	0.203164
2407	DB00982	isotretinoin	1.34e-05	HL60	0.500261	0.09	0.231158
3485	DB01181	ifosfamide	1.54e-05	MCF7	0.500034	0.04	0.203164
4761		foliosidine	1.3e-05	MCF7	0.499908	0.03	0.18866
3638		karakoline	1.06e-05	MCF7	0.499906	0	0
4003	DB00839	tolazamide	1.28e-05	PC3	0.499783	0.03	0.18866
2243	DB00759	tetracycline	8.4e-06	MCF7	0.499627	0.01	0.1525
2338	DB00643	mebendazole	1.36e-05	HL60	0.499029	0.04	0.203164
6991	DB00197	troglitazone	1e-05	MCF7	0.498808	0.04	0.203164
4673	DB08839	serotonin	1.88e-05	PC3	0.498659	0.04	0.203164
2482	DB00839	tolazamide	1.28e-05	HL60	0.498078	0.03	0.18866
6684	DB00741	hydrocortisone	1.1e-05	PC3	0.497887	0	0
5022	DB00934	maprotiline	1.28e-05	MCF7	0.497711	0.03	0.18866
6781	DB01625	isopropamide iodide	8.4e-06	MCF7	0.497357	0.05	0.210781
3205	DB04819	methapyrilene	1.34e-05	MCF7	0.497278	0.02	0.177068
1386		dizocilpine	1.18e-05	HL60	0.496309	0.01	0.1525
2046	DB00589	lisuride	1.18e-05	HL60	0.496225	0.03	0.18866
6582		AG-028671	1e-05	PC3	0.495982	0.03	0.18866
3545	DB04839	cyproterone	9.6e-06	MCF7	0.495439	0.03	0.18866
2131	DB00674	galantamine	1.08e-05	HL60	0.49478	0.05	0.210781
2647	DB02703	fusidic acid	7.4e-06	MCF7	0.494221	0.07	0.218414
4382		CP-320650-01	1e-06	MCF7	0.49408	0.02	0.177068
1489	DB01435	phenazone	2.12e-05	MCF7	0.493447	0.04	0.203164
6274		alpha-yohimbine	1.02e-05	MCF7	0.493109	0.09	0.231158
5457	DB00788	naproxen	1.74e-05	MCF7	0.492924	0.01	0.1525
2910	DB07814	gibberellic acid	1.16e-05	HL60	0.492729	0.02	0.177068
7399	DB01403	levomepromazine	9e-06	PC3	0.492312	0.05	0.210781
4551		lithocholic acid	1.06e-05	PC3	0.492281	0.02	0.177068
2250	DB00211	midodrine	1.38e-05	MCF7	0.492157	0	0
981		trichostatin A	1e-06	MCF7	0.491758	0.07	0.218414
6483	DB00373	timolol	9.2e-06	MCF7	0.491728	0.03	0.18866
2895	DB13345	dihydroergocristine	5.6e-06	MCF7	0.491584	0.07	0.218414
6259	DB00869	dorzolamide	1.1e-05	MCF7	0.49157	0.06	0.213162
2478	DB00339	pyrazinamide	3.24e-05	HL60	0.490825	0.03	0.18866
3527	DB08946	iopanoic acid	7e-06	MCF7	0.490666	0.05	0.210781
6899		SB-203580	1e-06	MCF7	0.490446	0.1	0.235977
4016	DB01210	levobunolol	1.22e-05	PC3	0.489926	0.03	0.18866
5422		2-aminobenzenesulfonamide	2.32e-05	MCF7	0.489755	0.05	0.210781
4405	DB00804	dicycloverine	1.16e-05	MCF7	0.489637	0.02	0.177068
5405	DB01054	nitrendipine	1.1e-05	MCF7	0.488627	0.01	0.1525
7369		kawain	1.74e-05	PC3	0.4885	0.04	0.203164
3425	DB01365	mephentermine	9.4e-06	MCF7	0.488476	0.03	0.18866
4343	DB01219	dantrolene	1.18e-05	PC3	0.488377	0.02	0.177068
5863	DB04821	nomifensine	1.12e-05	PC3	0.48813	0.02	0.177068
7329	DB01337	pancuronium bromide	5.4e-06	MCF7	0.487187	0.02	0.177068
5882		trichostatin A	1e-07	PC3	0.486699	0.06	0.213162
4800	DB00350	minoxidil	1.92e-05	MCF7	0.486308	0.01	0.1525
5406	DB00585	nizatidine	1.2e-05	MCF7	0.485993	0.05	0.210781
2081	DB00320	dihydroergotamine	3e-06	PC3	0.48545	0.02	0.177068
1149	DB00783	estradiol	1e-07	HL60	0.485422	0.02	0.177068
1337	DB01602	bacampicillin	8e-06	HL60	0.48505	0.01	0.1525
3314	DB00472	fluoxetine	1.16e-05	MCF7	0.484985	0.04	0.203164
4000		amiprilose	1.18e-05	PC3	0.484973	0.03	0.18866
5413		metitepine	8.4e-06	MCF7	0.484957	0.1	0.235977
3510		trichostatin A	1e-07	MCF7	0.484837	0.02	0.177068
1398	DB00320	dihydroergotamine	3e-06	HL60	0.484667	0.01	0.1525
3547	DB01299	sulfadoxine	1.28e-05	MCF7	0.48461	0.02	0.177068
4561		CP-690334-01	1e-06	PC3	0.484516	0.04	0.203164
6797		aconitine	6.2e-06	MCF7	0.484284	0.04	0.203164
1205	DB00947	fulvestrant	1e-06	PC3	0.48425	0.05	0.210781
3783		ethisterone	1.28e-05	PC3	0.484212	0.01	0.1525
3360	DB11423	lasalocid	6.6e-06	MCF7	0.484111	0.02	0.177068
2162		gelsemine	1.24e-05	HL60	0.483669	0.05	0.210781
6842	DB09156	iopromide	5e-06	MCF7	0.483446	0.06	0.213162
2524	DB00274	cefmetazole	8.2e-06	HL60	0.483257	0.02	0.177068
1514	DB00524	metolazone	1.1e-05	MCF7	0.482391	0.07	0.218414
4014	DB12604	sisomicin	2.8e-06	PC3	0.482368	0	0
544		monorden	1e-07	HL60	0.482186	0.04	0.203164
7137	DB00959	methylprednisolone	1.06e-05	PC3	0.482164	0.06	0.213162
2755	DB01392	yohimbine	1.02e-05	MCF7	0.481833	0.08	0.223751
4824	DB01006	letrozole	1.4e-05	MCF7	0.481227	0.07	0.218414
5255	DB02187	equilin	1.5e-05	MCF7	0.481087	0.1	0.235977
3737		myosmine	2.74e-05	PC3	0.480981	0.02	0.177068
606	DB01041	thalidomide	0.0001	MCF7	0.480702	0.01	0.1525
7539	DB00947	fulvestrant	1e-06	PC3	0.480698	0.1	0.235977
142	DB01124	tolbutamide	0.0001	MCF7	0.480486	0.04	0.203164
3977	DB00687	fludrocortisone	9.4e-06	MCF7	0.47989	0.02	0.177068
5333	DB00495	zidovudine	1.5e-05	MCF7	0.479372	0.03	0.18866
2756	DB00586	diclofenac	1.26e-05	MCF7	0.479233	0.07	0.218414
6916		trichostatin A	1e-06	MCF7	0.478997	0.07	0.218414
2930	DB08985	etilefrine	1.84e-05	HL60	0.478775	0.06	0.213162
6748	DB00612	bisoprolol	9e-06	PC3	0.478692	0.03	0.18866
4799	DB00943	zalcitabine	1.9e-05	MCF7	0.478634	0.08	0.223751
2336	DB00779	nalidixic acid	1.46e-05	HL60	0.478016	0.06	0.213162
2156	DB00378	dydrogesterone	1.28e-05	HL60	0.477842	0.08	0.223751
2723		cicloheximide	1.42e-05	HL60	0.477779	0.06	0.213162
1466	DB06711	naphazoline	1.62e-05	MCF7	0.477746	0.05	0.210781
5002	DB00169	colecalciferol	1.04e-05	MCF7	0.477515	0.03	0.18866
7328	DB11820	nifurtimox	1.4e-05	MCF7	0.477335	0.09	0.231158
6696	DB12661	urapidil	9.4e-06	PC3	0.476765	0.02	0.177068
1464	DB00501	cimetidine	1.58e-05	MCF7	0.476713	0.06	0.213162
2242	DB01234	dexamethasone	9.2e-06	MCF7	0.476616	0.06	0.213162
2878	DB06704	iobenguane	1.08e-05	MCF7	0.476387	0.02	0.177068
6013	DB11549	tiletamine	1.54e-05	MCF7	0.476138	0.06	0.213162
7273	DB00735	naftifine	1.24e-05	PC3	0.475887	0.05	0.210781
4601		3-acetamidocoumarin	1.96e-05	PC3	0.475623	0.05	0.210781
3247	DB00671	cefixime	8.8e-06	MCF7	0.475409	0.09	0.231158
2346	DB08981	fenbufen	1.58e-05	HL60	0.475283	0.08	0.223751
5467		etofylline	1.78e-05	MCF7	0.47509	0.05	0.210781
1539	DB00502	haloperidol	1.06e-05	MCF7	0.475012	0.11	0.239643
2970	DB00447	loracarbef	1.08e-05	HL60	0.474628	0.12	0.242304
4970	DB00999	hydrochlorothiazide	1.34e-05	MCF7	0.474525	0.09	0.231158
5014	DB13740	bemegride	2.58e-05	MCF7	0.47452	0.07	0.218414
7025	DB11389	clorsulon	1.06e-05	MCF7	0.474332	0.09	0.231158
1921	DB00916	metronidazole	2.34e-05	PC3	0.474321	0.11	0.239643
3540		Prestwick-1103	1.96e-05	MCF7	0.473415	0.06	0.213162
2450		trichostatin A	1e-07	HL60	0.472844	0.07	0.218414
1442	DB04818	iproniazid	1.44e-05	HL60	0.472748	0.06	0.213162
7090		SC-19220	1e-05	MCF7	0.472474	0.01	0.1525
2516	DB04571	trioxysalen	1.76e-05	HL60	0.472451	0.03	0.18866
3882	DB01000	ciclacillin	1.18e-05	MCF7	0.472166	0.06	0.213162
3541	DB06827	viomycin	5.2e-06	MCF7	0.472029	0.03	0.18866
6873		H-89	5e-07	PC3	0.471827	0.05	0.210781
4008	DB01045	rifampicin	4.8e-06	PC3	0.471301	0.05	0.210781
342	DB01051	novobiocin	0.0001	MCF7	0.471056	0.06	0.213162
3355		Prestwick-857	1.22e-05	MCF7	0.471019	0.06	0.213162
3083	DB11413	florfenicol	1.12e-05	HL60	0.470975	0.1	0.235977
1468	DB00805	minaprine	1.08e-05	MCF7	0.470762	0.07	0.218414
3746		trichostatin A	1e-07	PC3	0.470685	0.02	0.177068
3509	DB01106	levocabastine	8.8e-06	MCF7	0.470368	0.05	0.210781
5434	DB12478	piribedil	1.2e-05	MCF7	0.47028	0.08	0.223751
7553		CP-863187	1e-05	MCF7	0.469821	0.06	0.213162
2935		harpagoside	8e-06	HL60	0.469398	0.03	0.18866
4987		khellin	1.54e-05	MCF7	0.469292	0.12	0.242304
5637	DB00968	methyldopa	1.9e-05	MCF7	0.469123	0.04	0.203164
4300	DB01216	finasteride	1.08e-05	PC3	0.469114	0.04	0.203164
2767	DB13718	hydroquinine	9.4e-06	MCF7	0.468952	0.07	0.218414
7173		Prestwick-689	1.02e-05	MCF7	0.468866	0.05	0.210781
992		trichostatin A	1e-07	MCF7	0.468693	0.06	0.213162
4708	DB01327	cefazolin	8.4e-06	MCF7	0.468566	0.08	0.223751
704	DB00947	fulvestrant	1e-06	PC3	0.468345	0.04	0.203164
1516	DB00408	loxapine	9e-06	MCF7	0.468297	0.12	0.242304
3327	DB00919	spectinomycin	9.8e-06	MCF7	0.468163	0.05	0.210781
5048		etofylline	1.78e-05	PC3	0.468069	0.04	0.203164
6126	DB00826	natamycin	6e-06	HL60	0.467966	0.02	0.177068
2282	DB00355	aztreonam	9.2e-06	MCF7	0.467945	0.02	0.177068
7010		morantel	1.08e-05	MCF7	0.467828	0.01	0.1525
7425	DB00711	diethylcarbamazine	1.02e-05	MCF7	0.467827	0.05	0.210781
3728	DB01233	metoclopramide	1.18e-05	PC3	0.467701	0.03	0.18866
1744	DB00152	thiamine	1.18e-05	HL60	0.467345	0.08	0.223751
5240	DB08059	wortmannin	1e-08	MCF7	0.466975	0.15	0.252066
4967	DB00833	cefaclor	1.04e-05	MCF7	0.466897	0.07	0.218414
6293	DB01065	melatonin	1.72e-05	PC3	0.466596	0.09	0.231158
2288	DB04818	iproniazid	1.44e-05	MCF7	0.466551	0.07	0.218414
1664	DB02656	LY-294002	1e-05	MCF7	0.466481	0.04	0.203164
3742		etiocholanolone	1.38e-05	PC3	0.465818	0.04	0.203164
7241	DB00244	mesalazine	2.62e-05	MCF7	0.465712	0.07	0.218414
7240		quipazine	9e-06	MCF7	0.464834	0.11	0.239643
6299	DB13399	terguride	1.18e-05	PC3	0.464207	0.05	0.210781
2825	DB01032	probenecid	1.4e-05	MCF7	0.464201	0.1	0.235977
3776		PHA-00851261E	1e-06	PC3	0.464151	0.01	0.1525
3438	DB00226	guanadrel	7.6e-06	MCF7	0.464148	0.05	0.210781
5755	DB11696	racecadotril	1.04e-05	PC3	0.464116	0.06	0.213162
4770		trichostatin A	1e-07	MCF7	0.463986	0.05	0.210781
7178	DB14066	tetrandrine	6.4e-06	MCF7	0.463534	0.05	0.210781
7543		IC-86621	1e-06	MCF7	0.463476	0.09	0.231158
3521	DB00832	phensuximide	2.12e-05	MCF7	0.463372	0.04	0.203164
5238	DB00783	estradiol	1e-08	MCF7	0.463038	0.08	0.223751
5643	DB00787	aciclovir	1.78e-05	MCF7	0.462984	0.03	0.18866
5584	DB00831	trifluoperazine	1e-05	MCF7	0.462912	0.06	0.213162
2761	DB00572	atropine	5.8e-06	MCF7	0.462626	0.05	0.210781
6005	DB00955	netilmicin	2.8e-06	MCF7	0.462429	0.06	0.213162
2493	DB12604	sisomicin	2.8e-06	HL60	0.461842	0.08	0.223751
3828	DB00180	flunisolide	9.2e-06	MCF7	0.461762	0.06	0.213162
5348	DB00612	bisoprolol	9e-06	MCF7	0.461409	0.12	0.242304
6302	DB00878	chlorhexidine	8e-06	PC3	0.461194	0.1	0.235977
3532	DB00447	loracarbef	1.08e-05	MCF7	0.461105	0.11	0.239643
2743	DB04284	stachydrine	2.22e-05	MCF7	0.461014	0.11	0.239643
1631	DB05134	tanespimycin	1e-06	MCF7	0.460969	0.02	0.177068
7285		trichostatin A	1e-07	PC3	0.460399	0.08	0.223751
2023	DB11622	dehydrocholic acid	9.6e-06	HL60	0.460259	0.07	0.218414
6389		0225151-0000	1e-05	PC3	0.460243	0.01	0.1525
4140	DB01053	benzathine benzylpenicillin	4.2e-06	MCF7	0.459864	0.09	0.231158
7197	DB00951	isoniazid	2.92e-05	MCF7	0.459539	0.11	0.239643
2254	DB00749	etodolac	1.4e-05	MCF7	0.459433	0.06	0.213162
3396	DB00571	propranolol	1.36e-05	MCF7	0.458785	0.06	0.213162
2952		betulin	9e-06	HL60	0.458237	0.11	0.239643
7223	DB06691	mepyramine	1e-05	MCF7	0.457723	0.07	0.218414
4200	DB00249	idoxuridine	1.12e-05	PC3	0.457421	0.03	0.18866
3244	DB04652	corticosterone	1.16e-05	MCF7	0.45722	0.05	0.210781
4980		Prestwick-857	1.22e-05	MCF7	0.456931	0.09	0.231158
2442	DB00153	ergocalciferol	1e-05	HL60	0.456695	0.07	0.218414
5211	DB00313	valproic acid	0.0002	MCF7	0.456595	0.05	0.210781
1548	DB00755	tretinoin	1.34e-05	HL60	0.456487	0.06	0.213162
4235	DB00366	doxylamine	1.02e-05	PC3	0.456094	0.01	0.1525
5018	DB00340	metixene	1.16e-05	MCF7	0.456029	0.04	0.203164
4298		etiocholanolone	1.38e-05	PC3	0.455956	0.06	0.213162
3056	DB15492	eticlopride	1.06e-05	HL60	0.455618	0.06	0.213162
2507	DB06764	tetryzoline	1.68e-05	HL60	0.455503	0.11	0.239643
6308	DB12789	dinoprost	8.4e-06	PC3	0.455346	0.07	0.218414
5723		meprylcaine	1.48e-05	PC3	0.455135	0.04	0.203164
2408	DB00280	disopyramide	1.18e-05	HL60	0.45501	0.1	0.235977
2538	DB00891	sulfapyridine	1.6e-05	HL60	0.454969	0.06	0.213162
3433		lithocholic acid	1.06e-05	MCF7	0.454934	0.04	0.203164
3735		PNU-0230031	1e-06	PC3	0.454903	0.03	0.18866
6023	DB00180	flunisolide	9.2e-06	MCF7	0.454802	0.05	0.210781
3896	DB00911	tinidazole	1.62e-05	MCF7	0.454684	0.04	0.203164
3806		2,6-dimethylpiperidine	2.68e-05	PC3	0.454508	0.03	0.18866
1530	DB00415	ampicillin	1e-05	MCF7	0.4545	0.05	0.210781
5503	DB06793	levopropoxyphene	7.4e-06	MCF7	0.454162	0.07	0.218414
6101	DB00891	sulfapyridine	1.6e-05	MCF7	0.453724	0.04	0.203164
6354	DB09216	tolfenamic acid	1.52e-05	PC3	0.453627	0.07	0.218414
6739		hemicholinium	7e-06	PC3	0.453355	0.05	0.210781
5725		ricinine	2.44e-05	PC3	0.453091	0.11	0.239643
2248	DB00302	tranexamic acid	2.54e-05	MCF7	0.452886	0.05	0.210781
5203	DB05134	tanespimycin	1e-06	MCF7	0.452805	0.05	0.210781
6014	DB01605	pivmecillinam	8.4e-06	MCF7	0.452784	0.04	0.203164
4529	DB01325	quinethazone	1.38e-05	PC3	0.452557	0.05	0.210781
2348	DB00978	lomefloxacin	1.04e-05	HL60	0.452372	0.06	0.213162
1568	DB06691	mepyramine	1e-05	HL60	0.452348	0.06	0.213162
2621	DB09022	benfluorex	1.04e-05	MCF7	0.452177	0.07	0.218414
2223		acetylsalicylsalicylic acid	1.34e-05	MCF7	0.452106	0.03	0.18866
2228	DB09015	canrenoic acid	1e-05	MCF7	0.451984	0.09	0.231158
5502	DB06706	isometheptene	8.2e-06	MCF7	0.451667	0.05	0.210781
4720	DB00226	guanadrel	7.6e-06	MCF7	0.451643	0.09	0.231158
6016	DB13407	nifenazone	1.3e-05	MCF7	0.451627	0.07	0.218414
3769	DB11461	sulfachlorpyridazine	1.4e-05	PC3	0.451576	0.01	0.1525
2150		harman	1.82e-05	HL60	0.451542	0.07	0.218414
4680	DB03671	digoxigenin	1.02e-05	PC3	0.45154	0.06	0.213162
4465	DB00783	estradiol	1e-08	PC3	0.451426	0.03	0.18866
7354	DB01043	memantine	1.86e-05	MCF7	0.451405	0.07	0.218414
2745	DB06174	noscapine	9.6e-06	MCF7	0.450814	0.13	0.246964
1501	DB00525	tolnaftate	1.3e-05	MCF7	0.450613	0.09	0.231158
5409	DB12789	dinoprost	8.4e-06	MCF7	0.450543	0.1	0.235977
4986		methyldopate	1.46e-05	MCF7	0.450426	0.06	0.213162
4723	DB01403	levomepromazine	9e-06	MCF7	0.450081	0.09	0.231158
7185	DB01607	ticarcillin	9.4e-06	MCF7	0.449888	0.1	0.235977
5513	DB11156	pyrantel	1.12e-05	MCF7	0.449863	0.06	0.213162
4977		SR-95639A	1e-05	MCF7	0.449816	0.08	0.223751
5223	DB05134	tanespimycin	1e-06	MCF7	0.449511	0.1	0.235977
4669	DB14007	pentetic acid	1.02e-05	PC3	0.449342	0.07	0.218414
3886	DB01124	tolbutamide	1.48e-05	MCF7	0.449207	0.07	0.218414
5459		raubasine	1.02e-05	MCF7	0.449161	0.11	0.239643
6270	DB00904	ondansetron	1.22e-05	MCF7	0.449098	0.09	0.231158
7215	DB00586	diclofenac	1.26e-05	MCF7	0.448818	0.07	0.218414
6469	DB01428	oxybenzone	1.76e-05	MCF7	0.4488	0.1	0.235977
6351	DB01199	tubocurarine chloride	5.2e-06	PC3	0.448752	0.04	0.203164
1659		trichostatin A	1e-06	MCF7	0.448589	0.04	0.203164
6821		pipenzolate bromide	9.2e-06	MCF7	0.448045	0.11	0.239643
3745		betonicine	2.52e-05	PC3	0.447699	0.06	0.213162
3043	DB00627	nicotinic acid	3.24e-05	HL60	0.447567	0.03	0.18866
7390		PNU-0251126	1e-06	PC3	0.447486	0.12	0.242304
5796	DB00904	ondansetron	1.22e-05	PC3	0.447476	0.05	0.210781
4151	DB14103	L-methionine sulfoximine	2.22e-05	MCF7	0.447251	0.05	0.210781
3741		karakoline	1.06e-05	PC3	0.447251	0.02	0.177068
6741	DB01085	pilocarpine	1.48e-05	PC3	0.446691	0.06	0.213162
6799	DB00891	sulfapyridine	1.6e-05	MCF7	0.446638	0.03	0.18866
1318	DB01578	metrizamide	5e-06	HL60	0.445772	0.07	0.218414
6742	DB00411	carbachol	2.18e-05	PC3	0.445035	0.06	0.213162
5421	DB00393	nimodipine	9.6e-06	MCF7	0.445032	0.09	0.231158
5769	DB01113	papaverine	1.06e-05	PC3	0.444956	0.08	0.223751
6990		15-delta prostaglandin J2	1e-05	MCF7	0.444848	0.02	0.177068
7170	DB00221	isoetarine	1.2e-05	MCF7	0.444502	0.03	0.18866
1726	DB11582	thiocolchicoside	7e-06	HL60	0.444377	0.02	0.177068
4441	DB00477	chlorpromazine	1e-06	PC3	0.444192	0.05	0.210781
1756		tetrahydroalstonine	1.14e-05	HL60	0.443726	0.01	0.1525
5433	DB00807	proxymetacaine	1.2e-05	MCF7	0.443721	0.13	0.246964
5883	DB00798	gentamicin	2.6e-06	PC3	0.443623	0.07	0.218414
4544		beta-escin	3.2e-06	PC3	0.443507	0.09	0.231158
3080	DB09552	tonzonium bromide	6.8e-06	HL60	0.443216	0.03	0.18866
3175	DB00568	cinnarizine	1.08e-05	MCF7	0.442732	0.03	0.18866
5392	DB00524	metolazone	1.1e-05	MCF7	0.442641	0.08	0.223751
3635		benzamil	1.12e-05	MCF7	0.442558	0.04	0.203164
7427	DB01127	econazole	9e-06	MCF7	0.442518	0.07	0.218414
5109	DB00784	mefenamic acid	1.66e-05	PC3	0.442451	0.1	0.235977
4490	DB02925	piretanide	1.1e-05	PC3	0.442432	0.04	0.203164
3302	DB00553	methoxsalen	1.86e-05	MCF7	0.442228	0.05	0.210781
3795		santonin	1.62e-05	PC3	0.442055	0.01	0.1525
5875	DB00996	gabapentin	2.34e-05	PC3	0.442002	0.12	0.242304
5234	DB00623	fluphenazine	1e-05	MCF7	0.441288	0.12	0.242304
4494	DB01614	acepromazine	9e-06	PC3	0.441198	0.07	0.218414
4442	DB05134	tanespimycin	1e-06	PC3	0.440877	0.04	0.203164
7034	DB13345	dihydroergocristine	5.6e-06	MCF7	0.440651	0.08	0.223751
3238	DB06742	ambroxol	9.6e-06	MCF7	0.440496	0.1	0.235977
6721	DB00336	nitrofural	2.02e-05	PC3	0.440433	0.03	0.18866
2141	DB01833	canavanine	1.36e-05	HL60	0.440357	0.12	0.242304
3097	DB01708	prasterone	1.22e-05	HL60	0.44029	0.05	0.210781
441	DB04557	arachidonic acid	1e-05	MCF7	0.440148	0.11	0.239643
4134	DB01210	levobunolol	1.22e-05	MCF7	0.439778	0.04	0.203164
3346	DB01357	mestranol	1.28e-05	MCF7	0.439116	0.09	0.231158
1538	DB01406	danazol	1.18e-05	MCF7	0.438935	0.09	0.231158
3513		betulin	9e-06	MCF7	0.438833	0.14	0.249708
2091	DB00749	etodolac	1.4e-05	PC3	0.438687	0.06	0.213162
3329	DB00562	benzthiazide	9.2e-06	MCF7	0.438249	0.1	0.235977
5025	DB08792	diloxanide	1.22e-05	MCF7	0.438146	0.12	0.242304
3999		gramine	2.3e-05	PC3	0.437517	0.07	0.218414
2764		calycanthine	1.16e-05	MCF7	0.437384	0.11	0.239643
6242		skimmianine	1.54e-05	MCF7	0.437288	0.02	0.177068
2845	DB00816	orciprenaline	7.6e-06	MCF7	0.43722	0.09	0.231158
4527	DB00615	rifabutin	4.8e-06	PC3	0.437177	0.04	0.203164
4023	DB00916	metronidazole	2.34e-05	PC3	0.436776	0.03	0.18866
6829		altizide	1.04e-05	MCF7	0.436692	0.03	0.18866
2562	DB01247	isocarboxazid	1.72e-05	HL60	0.436299	0.1	0.235977
3178	DB01100	pimozide	8.6e-06	MCF7	0.436258	0.03	0.18866
5856	DB00235	milrinone	1.9e-05	PC3	0.436202	0.14	0.249708
4774	DB13478	meptazinol	1.48e-05	MCF7	0.436165	0.19	0.260332
2686	DB05134	tanespimycin	1e-06	HL60	0.435987	0.06	0.213162
2157		hydroxyachillin	1.42e-05	HL60	0.435953	0.08	0.223751
1781	DB00944	demecarium bromide	5.6e-06	HL60	0.435487	0.06	0.213162
2821	DB13580	succinylsulfathiazole	1.12e-05	MCF7	0.435409	0.1	0.235977
3171	DB01170	guanethidine	1.34e-05	MCF7	0.435138	0.04	0.203164
5592	DB00197	troglitazone	1e-05	MCF7	0.435108	0.06	0.213162
3816		lithocholic acid	1.06e-05	PC3	0.435106	0.07	0.218414
6011		hydrastine hydrochloride	9.6e-06	MCF7	0.435058	0.11	0.239643
2560	DB01582	sulfadimidine	1.34e-05	HL60	0.434866	0.04	0.203164
3809	DB00754	ethotoin	1.96e-05	PC3	0.434829	0.04	0.203164
5119	DB01130	prednicarbate	8.2e-06	PC3	0.434683	0.14	0.249708
4342	DB00687	fludrocortisone	9.4e-06	PC3	0.434126	0.06	0.213162
2922		epitiostanol	1.3e-05	HL60	0.433659	0.06	0.213162
4500		epivincamine	1.12e-05	PC3	0.433502	0.07	0.218414
5250	DB00567	cefalexin	1.1e-05	MCF7	0.433463	0.11	0.239643
1663	DB00947	fulvestrant	1e-08	MCF7	0.432814	0.1	0.235977
7407		trichostatin A	1e-07	MCF7	0.432555	0.08	0.223751
3786	DB01219	dantrolene	1.18e-05	PC3	0.432061	0.09	0.231158
990		alpha-estradiol	1e-08	MCF7	0.431939	0.01	0.1525
2646	DB13511	clebopride	8.2e-06	MCF7	0.431775	0.11	0.239643
390	DB00755	tretinoin	1e-06	HL60	0.431308	0.1	0.235977
5016	DB01194	brinzolamide	1.04e-05	MCF7	0.431076	0.11	0.239643
4498		diperodon	9.2e-06	PC3	0.431034	0.07	0.218414
2810		vitexin	9.2e-06	MCF7	0.43067	0.06	0.213162
6846	DB00264	metoprolol	5.8e-06	MCF7	0.430637	0.08	0.223751
3774		0317956-0000	1e-05	PC3	0.430574	0.08	0.223751
4742	DB09401	isosorbide	1.7e-05	MCF7	0.430493	0.13	0.246964
3986		fusaric acid	2.24e-05	PC3	0.430303	0.08	0.223751
3189	DB01058	praziquantel	1.28e-05	MCF7	0.430284	0.11	0.239643
2703	DB08059	wortmannin	1e-08	HL60	0.430236	0.12	0.242304
5808		tomatidine	9.6e-06	PC3	0.430158	0.1	0.235977
6343		S-propranolol	1.36e-05	PC3	0.429868	0.04	0.203164
6288	DB00639	butoconazole	8.4e-06	PC3	0.429438	0.07	0.218414
7441	DB01074	perhexiline	1.02e-05	MCF7	0.429333	0.06	0.213162
6943	DB05134	tanespimycin	1e-06	MCF7	0.429132	0.06	0.213162
5019	DB01708	prasterone	1.22e-05	MCF7	0.428975	0.05	0.210781
4240	DB01006	letrozole	1.4e-05	PC3	0.428915	0.07	0.218414
1494	DB13720	diphemanil metilsulfate	1.02e-05	MCF7	0.42848	0.04	0.203164
1333	DB13808	mebhydrolin	4.8e-06	HL60	0.428076	0.05	0.210781
6694	DB00408	loxapine	9e-06	PC3	0.427719	0.07	0.218414
2188		Prestwick-685	1.06e-05	HL60	0.427612	0.07	0.218414
4419		Prestwick-642	1.38e-05	MCF7	0.427305	0.09	0.231158
2332	DB00400	griseofulvin	1.12e-05	HL60	0.427185	0.08	0.223751
4757		PNU-0230031	1e-06	MCF7	0.427137	0.08	0.223751
2290	DB00806	pentoxifylline	1.44e-05	MCF7	0.427028	0.16	0.252719
4486		napelline	1.12e-05	PC3	0.426936	0.07	0.218414
3322	DB01362	iohexol	4.8e-06	MCF7	0.426812	0.15	0.252066
3336		fosfosal	1.84e-05	MCF7	0.426748	0.05	0.210781
1206	DB05134	tanespimycin	1e-06	PC3	0.426651	0.02	0.177068
3323	DB00607	nafcillin	8.8e-06	MCF7	0.426153	0.11	0.239643
6421		PF-00539758-00	1e-05	PC3	0.426125	0.16	0.252719
6067		ricinine	2.44e-05	MCF7	0.426073	0.06	0.213162
3051	DB13740	bemegride	2.58e-05	HL60	0.426042	0.05	0.210781
7364	DB13715	dilazep	6e-06	PC3	0.425728	0.03	0.18866
6574		5155877	1e-05	MCF7	0.425586	0.13	0.246964
6055		myosmine	2.74e-05	MCF7	0.425348	0.08	0.223751
2688	DB02424	geldanamycin	1e-06	HL60	0.425341	0.15	0.252066
2163		canadine	1.18e-05	HL60	0.425235	0.18	0.256962
663		U0125	1e-06	PC3	0.424904	0.02	0.177068
6814	DB00575	clonidine	1.5e-05	MCF7	0.424885	0.07	0.218414
2405	DB01017	minocycline	8e-06	HL60	0.424809	0.06	0.213162
3215	DB00622	nicardipine	7.8e-06	MCF7	0.424771	0.12	0.242304
2819		Prestwick-682	6e-06	MCF7	0.424729	0.13	0.246964
5485	DB00711	diethylcarbamazine	1.02e-05	MCF7	0.424699	0.05	0.210781
3210	DB00672	chlorpropamide	1.44e-05	MCF7	0.424643	0.07	0.218414
3583	DB09342	propoxycaine	1.2e-05	MCF7	0.424475	0.11	0.239643
5527	DB00301	flucloxacillin	8.4e-06	MCF7	0.424371	0.11	0.239643
4421	DB00281	lidocaine	1.48e-05	MCF7	0.423739	0.11	0.239643
2794		trichostatin A	1e-07	MCF7	0.423553	0.11	0.239643
7297	DB00680	moracizine	8.6e-06	PC3	0.423488	0.04	0.203164
2989	DB00562	benzthiazide	9.2e-06	HL60	0.423469	0.1	0.235977
3011	DB08800	chloropyramine	1.22e-05	HL60	0.423465	0.06	0.213162
3398	DB07477	felbinac	1.88e-05	MCF7	0.423043	0.08	0.223751
3632		PNU-0230031	1e-06	MCF7	0.422812	0.05	0.210781
2125	DB04818	iproniazid	1.44e-05	PC3	0.422724	0.1	0.235977
2390	DB00357	aminoglutethimide	1.72e-05	HL60	0.422637	0.11	0.239643
7384	DB01365	mephentermine	9.4e-06	PC3	0.42244	0.07	0.218414
3720	DB09401	isosorbide	1.7e-05	PC3	0.422381	0.09	0.231158
6289	DB01004	ganciclovir	1.56e-05	PC3	0.422035	0.05	0.210781
5495		harmalol	1.46e-05	MCF7	0.421976	0.06	0.213162
2834	DB00738	pentamidine	6.8e-06	MCF7	0.421632	0.1	0.235977
2943	DB14081	asiaticoside	4.2e-06	HL60	0.42154	0.12	0.242304
2497	DB02789	pregnenolone	1.26e-05	HL60	0.42146	0.09	0.231158
5450	DB00985	dimenhydrinate	8.6e-06	MCF7	0.421425	0.07	0.218414
5115	DB13836	metampicillin	1.04e-05	PC3	0.421423	0.09	0.231158
3530		Prestwick-1082	1.2e-05	MCF7	0.421205	0.06	0.213162
6786	DB00748	carbinoxamine	9.8e-06	MCF7	0.420746	0.12	0.242304
5862	DB00912	repaglinide	8.8e-06	PC3	0.42068	0.1	0.235977
3325	DB01077	etidronic acid	1.6e-05	MCF7	0.420628	0.1	0.235977
3641	DB01216	finasteride	1.08e-05	MCF7	0.420286	0.06	0.213162
5923		PF-00875133-00	1e-05	MCF7	0.420197	0.09	0.231158
3898	DB00763	thiamazole	3.5e-05	MCF7	0.420195	0.09	0.231158
4749	DB00750	prilocaine	1.56e-05	MCF7	0.420076	0.14	0.249708
2263	DB00356	chlorzoxazone	2.36e-05	MCF7	0.420044	0.08	0.223751
2135		conessine	1.12e-05	HL60	0.419992	0.1	0.235977
2255	DB13415	pentetrazol	2.9e-05	MCF7	0.419956	0.06	0.213162
3248	DB01783	calcium pantothenate	8e-06	MCF7	0.419901	0.05	0.210781
6459	DB13399	terguride	1.18e-05	MCF7	0.419502	0.1	0.235977
3539		quinpirole	1.56e-05	MCF7	0.419493	0.15	0.252066
2979	DB06827	viomycin	5.2e-06	HL60	0.419286	0.05	0.210781
2149	DB13875	harmaline	1.4e-05	HL60	0.4192	0.07	0.218414
2670		alpha-estradiol	1e-08	HL60	0.41916	0.17	0.254354
2639		trichostatin A	1e-07	MCF7	0.419113	0.1	0.235977
7541		16-phenyltetranorprostaglandin E2	1e-05	MCF7	0.419012	0.12	0.242304
6573		PNU-0293363	1e-05	MCF7	0.418554	0.08	0.223751
4336	DB00692	phentolamine	1.26e-05	PC3	0.418381	0.05	0.210781
2736	DB01246	alimemazine	5.4e-06	HL60	0.41787	0.11	0.239643
2789		cinchonine	1.36e-05	MCF7	0.417836	0.15	0.252066
602	DB00091	ciclosporin	1e-06	MCF7	0.417731	0.04	0.203164
6833		(-)-isoprenaline	1.62e-05	MCF7	0.417697	0.13	0.246964
5633	DB08839	serotonin	1.88e-05	MCF7	0.417562	0.13	0.246964
6378	DB00580	valdecoxib	1e-05	PC3	0.41737	0.09	0.231158
5508	DB13415	pentetrazol	2.9e-05	MCF7	0.417204	0.11	0.239643
1145	DB00945	acetylsalicylic acid	0.0001	HL60	0.41665	0.03	0.18866
1162	DB00877	sirolimus	1e-07	HL60	0.416359	0.02	0.177068
2451	DB00340	metixene	1.16e-05	HL60	0.416292	0.12	0.242304
3009	DB00500	tolmetin	1.26e-05	HL60	0.416254	0.1	0.235977
5466	DB00446	chloramphenicol	1.24e-05	MCF7	0.416082	0.11	0.239643
4542	DB11410	fenbendazole	1.34e-05	PC3	0.415775	0.1	0.235977
4024	DB12029	chlorogenic acid	1.12e-05	PC3	0.415724	0.05	0.210781
4496	DB00960	pindolol	1.62e-05	PC3	0.415658	0.14	0.249708
4459	DB01645	genistein	1e-05	PC3	0.415645	0.09	0.231158
2217	DB01114	chlorphenamine	1.02e-05	MCF7	0.415491	0.12	0.242304
7015	DB09205	moxisylyte	1.26e-05	MCF7	0.414973	0	0
6360		raubasine	1.02e-05	PC3	0.414968	0.15	0.252066
2089	DB00554	piroxicam	1.2e-05	PC3	0.414299	0.05	0.210781
6680	DB01092	ouabain	5.4e-06	PC3	0.414101	0.09	0.231158
1644		monorden	1e-07	MCF7	0.413802	0.03	0.18866
7509		16-phenyltetranorprostaglandin E2	1e-05	PC3	0.413608	0.08	0.223751
7208	DB06707	corbadrine	2.18e-05	MCF7	0.4136	0.05	0.210781
2904		trichostatin A	1e-07	HL60	0.413594	0.12	0.242304
5858		delsoline	8.6e-06	PC3	0.413591	0.04	0.203164
1542	DB01229	paclitaxel	4.6e-06	MCF7	0.412814	0.14	0.249708
6362	DB11636	nomegestrol	1.08e-05	PC3	0.412573	0.12	0.242304
6340		trichostatin A	1e-07	PC3	0.412323	0.08	0.223751
2446	DB12789	dinoprost	8.4e-06	HL60	0.412084	0.12	0.242304
2949		trichostatin A	1e-07	HL60	0.411703	0.08	0.223751
3207	DB04840	debrisoquine	9e-06	MCF7	0.411646	0.13	0.246964
4017	DB01043	memantine	1.86e-05	PC3	0.411631	0.08	0.223751
5523	DB00359	sulfadiazine	1.6e-05	MCF7	0.41151	0.14	0.249708
2520	DB14066	tetrandrine	6.4e-06	HL60	0.411484	0.1	0.235977
5388	DB00639	butoconazole	8.4e-06	MCF7	0.411335	0.11	0.239643
5464		adrenosterone	1.34e-05	MCF7	0.411239	0.07	0.218414
6522	DB07402	azapropazone	1.34e-05	MCF7	0.411177	0.13	0.246964
865		quinostatin	1e-05	MCF7	0.410851	0.07	0.218414
1486	DB00679	thioridazine	9.8e-06	MCF7	0.410693	0.17	0.254354
281	DB00687	fludrocortisone	1e-06	MCF7	0.41057	0.09	0.231158
3620	DB00978	lomefloxacin	1.04e-05	MCF7	0.410509	0.08	0.223751
3855		0317956-0000	1e-05	MCF7	0.41031	0.15	0.252066
3730	DB12293	nefopam	1.38e-05	PC3	0.410303	0.08	0.223751
3358	DB00614	furazolidone	1.78e-05	MCF7	0.410151	0.17	0.254354
6170	DB00755	tretinoin	1e-06	HL60	0.409874	0.07	0.218414
6618		protoveratrine A	5e-06	PC3	0.409689	0.09	0.231158
7522		CP-645525-01	1e-05	MCF7	0.409622	0.11	0.239643
7206	DB00602	ivermectin	4.6e-06	MCF7	0.409229	0.09	0.231158
4573	DB00738	pentamidine	6.8e-06	PC3	0.408996	0.12	0.242304
3781	DB00379	mexiletine	1.86e-05	PC3	0.408683	0.07	0.218414
5244	DB00737	meclozine	8.6e-06	MCF7	0.408444	0.07	0.218414
5418		coralyne	9.6e-06	MCF7	0.408138	0.11	0.239643
3764		ethoxyquin	1.84e-05	PC3	0.408096	0.07	0.218414
5888	DB00244	mesalazine	2.62e-05	PC3	0.40792	0.1	0.235977
2985	DB01077	etidronic acid	1.6e-05	HL60	0.407692	0.1	0.235977
3397	DB03671	digoxigenin	1.02e-05	MCF7	0.407585	0.11	0.239643
3878		Prestwick-1080	1.5e-05	MCF7	0.407249	0.11	0.239643
4130	DB01620	pheniramine	1.12e-05	MCF7	0.407143	0.07	0.218414
4682	DB00845	clofazimine	8.4e-06	PC3	0.40695	0.07	0.218414
5535	DB00355	aztreonam	9.2e-06	MCF7	0.406904	0.16	0.252719
6552	DB00917	dinoprostone	1e-05	MCF7	0.406734	0.16	0.252719
6989	DB00679	thioridazine	1e-05	MCF7	0.406607	0.07	0.218414
2245	DB00798	gentamicin	2.6e-06	MCF7	0.406475	0.08	0.223751
4539	DB00499	flutamide	1.44e-05	PC3	0.406451	0.16	0.252719
4022	DB01053	benzathine benzylpenicillin	4.2e-06	PC3	0.405855	0.08	0.223751
2274	DB00423	methocarbamol	1.66e-05	MCF7	0.405811	0.13	0.246964
4378	DB00715	paroxetine	1e-06	MCF7	0.405707	0.09	0.231158
168	DB00605	sulindac	0.0001	MCF7	0.40567	0.11	0.239643
1536	DB00181	baclofen	1.88e-05	MCF7	0.405644	0.19	0.260332
4120	DB00330	ethambutol	1.44e-05	MCF7	0.405529	0.13	0.246964
3902		withaferin A	1e-06	MCF7	0.405403	0.08	0.223751
4718	DB01326	cefamandole	8.2e-06	MCF7	0.405369	0.11	0.239643
3514	DB00256	lymecycline	6.6e-06	MCF7	0.405316	0.1	0.235977
5443	DB00409	remoxipride	9.8e-06	MCF7	0.405141	0.2	0.264585
4108	DB08984	etofenamate	1.08e-05	MCF7	0.405052	0.1	0.235977
5988	DB00465	ketorolac	1.06e-05	MCF7	0.404964	0.08	0.223751
4462	DB00947	fulvestrant	1e-08	PC3	0.404596	0.06	0.213162
3893	DB08936	chlorcyclizine	1.18e-05	MCF7	0.404568	0.16	0.252719
5740	DB09064	ciprofibrate	1.38e-05	PC3	0.404451	0.2	0.264585
6726	DB09134	ioversol	5e-06	PC3	0.404367	0.08	0.223751
3845	DB00319	piperacillin	7.4e-06	MCF7	0.404296	0.17	0.254354
3542	DB01130	prednicarbate	8.2e-06	MCF7	0.404187	0.16	0.252719
4127		sulmazole	1.4e-05	MCF7	0.404175	0.09	0.231158
5468	DB00328	indometacin	1.12e-05	MCF7	0.403368	0.16	0.252719
7391		0173570-0000	1e-06	PC3	0.402947	0.05	0.210781
3535	DB01605	pivmecillinam	8.4e-06	MCF7	0.402898	0.14	0.249708
4138		canadine	1.18e-05	MCF7	0.402877	0.1	0.235977
6062	DB01216	finasteride	1.08e-05	MCF7	0.402853	0.16	0.252719
5226	DB00363	clozapine	1e-05	MCF7	0.402717	0.1	0.235977
4699	DB01090	pentolonium	7.4e-06	MCF7	0.402685	0.14	0.249708
6743	DB00490	buspirone	9.4e-06	PC3	0.402554	0.11	0.239643
7491		CP-319743	1e-05	PC3	0.402417	0.16	0.252719
5202	DB00947	fulvestrant	1e-06	MCF7	0.402012	0.04	0.203164
2401	DB01039	fenofibrate	1.1e-05	HL60	0.401836	0.08	0.223751
3780	DB13431	proglumide	1.2e-05	PC3	0.40157	0.07	0.218414
5750		chloropyrazine	3.5e-05	PC3	0.401134	0.11	0.239643
6236		(+)-chelidonine	1.08e-05	MCF7	0.400877	0.05	0.210781
4523	DB00291	chlorambucil	1.32e-05	PC3	0.40086	0.08	0.223751
4726	DB11430	monensin	5.8e-06	MCF7	0.40085	0.21	0.269571
6476		desoxycortone	1.22e-05	MCF7	0.400692	0.15	0.252066
7277	DB07402	azapropazone	1.34e-05	PC3	0.400577	0.08	0.223751
3988		cinchonine	1.36e-05	PC3	0.40045	0.1	0.235977
2165		Prestwick-692	7.4e-06	HL60	0.400215	0.14	0.249708
2280	DB00593	ethosuximide	2.84e-05	MCF7	0.399449	0.07	0.218414
2710	DB06707	corbadrine	2.18e-05	HL60	0.398752	0.14	0.249708
3543	DB06793	levopropoxyphene	7.4e-06	MCF7	0.398737	0.12	0.242304
6764	DB07374	anisomycin	1.5e-05	PC3	0.398642	0.1	0.235977
3356	DB01421	paromomycin	5.6e-06	MCF7	0.398597	0.09	0.231158
4587		tetramisole	1.66e-05	PC3	0.398195	0.13	0.246964
3012		(+/-)-catechin	1.38e-05	HL60	0.39806	0.12	0.242304
5414	DB00181	baclofen	1.88e-05	MCF7	0.398059	0.11	0.239643
6720	DB01229	paclitaxel	4.6e-06	PC3	0.397691	0.14	0.249708
5454	DB09216	tolfenamic acid	1.52e-05	MCF7	0.397596	0.21	0.269571
6166	DB05134	tanespimycin	1e-06	HL60	0.397574	0.06	0.213162
638	DB01645	genistein	1e-05	MCF7	0.397283	0.16	0.252719
5540	DB13836	metampicillin	1.04e-05	MCF7	0.397239	0.14	0.249708
4805	DB00525	tolnaftate	1.3e-05	MCF7	0.397093	0.17	0.254354
3053		caffeic acid	2.22e-05	HL60	0.396597	0.13	0.246964
7084	DB11841	MS-275	1e-05	PC3	0.396591	0.02	0.177068
4501	DB01053	benzylpenicillin	1.12e-05	PC3	0.396579	0.11	0.239643
7506	DB01132	pioglitazone	1e-05	MCF7	0.396104	0.14	0.249708
481		pirinixic acid	0.0001	PC3	0.396017	0.14	0.249708
3103	DB00393	nimodipine	9.6e-06	HL60	0.395914	0.13	0.246964
4685	DB00373	timolol	9.2e-06	PC3	0.395584	0.13	0.246964
3225	DB00126	ascorbic acid	2.24e-05	MCF7	0.39551	0.15	0.252066
2698	DB00947	fulvestrant	1e-08	HL60	0.395214	0.13	0.246964
4794	DB00861	diflunisal	1.6e-05	MCF7	0.394977	0.19	0.260332
5516	DB09186	nisoxetine	1.3e-05	MCF7	0.394852	0.15	0.252066
2367	DB13374	vincamine	1.12e-05	HL60	0.394461	0.1	0.235977
5272	DB00968	methyldopa	1.9e-05	MCF7	0.394377	0.16	0.252719
6703	DB01055	mimosine	2.02e-05	PC3	0.3941	0.08	0.223751
3765	DB01582	sulfadimidine	1.34e-05	PC3	0.394096	0.15	0.252066
5878	DB01418	acenocoumarol	1.14e-05	PC3	0.393788	0.12	0.242304
1822	DB00477	chlorpromazine	1.12e-05	PC3	0.393786	0.06	0.213162
4985	DB11423	lasalocid	6.6e-06	MCF7	0.39371	0.11	0.239643
3237	DB00131	adenosine phosphate	1.1e-05	MCF7	0.393468	0.14	0.249708
3330	DB00387	procyclidine	1.24e-05	MCF7	0.393439	0.12	0.242304
7304		Trolox C	1.6e-05	PC3	0.393344	0.05	0.210781
5644	DB00810	biperiden	1.14e-05	MCF7	0.393083	0.08	0.223751
6244	DB00473	hexylcaine	1.34e-05	MCF7	0.393044	0.08	0.223751
2378	DB01288	fenoterol	1.04e-05	HL60	0.393041	0.07	0.218414
2772		cinchonidine	1.36e-05	MCF7	0.393003	0.16	0.252719
7136		trichostatin A	1e-07	PC3	0.39297	0.05	0.210781
6089		altizide	1.04e-05	MCF7	0.392571	0.08	0.223751
4848	DB01249	iodixanol	2.6e-06	MCF7	0.392493	0.11	0.239643
4301		betonicine	2.52e-05	PC3	0.39249	0.11	0.239643
2939	DB01053	benzathine benzylpenicillin	4.2e-06	HL60	0.392328	0.13	0.246964
2391	DB00540	nortriptyline	1.34e-05	HL60	0.392294	0.13	0.246964
5277	DB00845	clofazimine	8.4e-06	MCF7	0.391985	0.17	0.254354
4449	DB05134	tanespimycin	1e-06	PC3	0.391981	0.04	0.203164
3817		alpha-ergocryptine	7e-06	PC3	0.391607	0.19	0.260332
2386		homochlorcyclizine	1.04e-05	HL60	0.390844	0.13	0.246964
507		SC-58125	1e-05	SKMEL5	0.390812	0.08	0.223751
2773	DB00944	demecarium bromide	5.6e-06	MCF7	0.390514	0.12	0.242304
3833	DB00420	promazine	1.24e-05	MCF7	0.39041	0.12	0.242304
3536	DB00735	naftifine	1.24e-05	MCF7	0.390404	0.11	0.239643
4678	DB00502	haloperidol	1.06e-05	PC3	0.390403	0.18	0.256962
4560		CP-320650-01	1e-06	PC3	0.390072	0.14	0.249708
4204		epitiostanol	1.3e-05	PC3	0.38996	0.17	0.254354
4256	DB01056	tocainide	1.74e-05	PC3	0.389611	0.07	0.218414
6319	DB08958	hexetidine	1.18e-05	PC3	0.389368	0.12	0.242304
4638	DB11221	dioxybenzone	1.64e-05	PC3	0.389342	0.18	0.256962
5389	DB01004	ganciclovir	1.56e-05	MCF7	0.388915	0.11	0.239643
594		arachidonyltrifluoromethane	1e-05	MCF7	0.388888	0.08	0.223751
4793	DB02918	zardaverine	1.5e-05	MCF7	0.388855	0.16	0.252719
4131	DB00835	brompheniramine	9.2e-06	MCF7	0.388623	0.15	0.252066
3220	DB13792	clopamide	1.16e-05	MCF7	0.388165	0.13	0.246964
7366	DB01015	sulfamethoxazole	1.58e-05	PC3	0.387957	0.02	0.177068
6666	DB00485	dicloxacillin	8.2e-06	PC3	0.387669	0.17	0.254354
2570	DB00763	thiamazole	3.5e-05	HL60	0.38753	0.14	0.249708
1307	DB04652	corticosterone	1.16e-05	HL60	0.387221	0.03	0.18866
3390	DB13155	esculin	1.18e-05	MCF7	0.387098	0.1	0.235977
3202	DB00871	terbutaline	7.2e-06	MCF7	0.387093	0.12	0.242304
4581	DB00804	dicycloverine	1.16e-05	PC3	0.386854	0.14	0.249708
4066	DB11477	xylazine	1.82e-05	PC3	0.386778	0.09	0.231158
3883	DB01173	orphenadrine	1.3e-05	MCF7	0.386519	0.17	0.254354
3736		0179445-0000	1e-06	PC3	0.386491	0.14	0.249708
2392	DB00645	dyclonine	1.22e-05	HL60	0.386309	0.08	0.223751
5400	DB13399	terguride	1.18e-05	MCF7	0.386102	0.21	0.269571
3276	DB00521	carteolol	1.22e-05	MCF7	0.385969	0.09	0.231158
5937	DB02656	LY-294002	1e-05	MCF7	0.385922	0.08	0.223751
5444		S-propranolol	1.36e-05	MCF7	0.385659	0.13	0.246964
5471	DB11100	allantoin	2.52e-05	MCF7	0.385568	0.17	0.254354
4191		conessine	1.12e-05	PC3	0.385501	0.1	0.235977
2134	DB06727	sparteine	1.7e-05	HL60	0.385478	0.07	0.218414
3561	DB09064	ciprofibrate	1.38e-05	MCF7	0.385123	0.07	0.218414
2404	DB00297	bupivacaine	1.24e-05	HL60	0.385003	0.1	0.235977
6693	DB01151	desipramine	1.32e-05	PC3	0.384973	0.16	0.252719
2803		yohimbic acid	1.12e-05	MCF7	0.384957	0.12	0.242304
2542	DB13337	pheneticillin	1e-05	HL60	0.384904	0.11	0.239643
6481	DB00665	nilutamide	1.26e-05	MCF7	0.384656	0.12	0.242304
3704	DB11430	monensin	5.8e-06	PC3	0.384622	0.09	0.231158
1645	DB02546	vorinostat	1e-05	MCF7	0.384433	0.08	0.223751
2460	DB00810	biperiden	1.14e-05	HL60	0.384308	0.12	0.242304
5412	DB13511	clebopride	8.2e-06	MCF7	0.384278	0.08	0.223751
3287	DB00396	progesterone	1.28e-05	MCF7	0.384152	0.17	0.254354
2112	DB04743	nimesulide	1.3e-05	PC3	0.384048	0.13	0.246964
4179	DB00770	alprostadil	1.12e-05	MCF7	0.383426	0.14	0.249708
5455		10-methoxyharmalan	1.86e-05	MCF7	0.383164	0.12	0.242304
5841	DB01179	podophyllotoxin	9.6e-06	PC3	0.383041	0.15	0.252066
6369		erastin	2e-05	PC3	0.382891	0.05	0.210781
2720	DB01625	isopropamide iodide	8.4e-06	HL60	0.382864	0.12	0.242304
2472	DB06698	betahistine	1.72e-05	HL60	0.382718	0.08	0.223751
4070	DB14103	L-methionine sulfoximine	2.22e-05	PC3	0.382653	0.16	0.252719
7505		16-phenyltetranorprostaglandin E2	1e-05	MCF7	0.382449	0.12	0.242304
310	DB00947	fulvestrant	1e-08	MCF7	0.382297	0.08	0.223751
3634		myosmine	2.74e-05	MCF7	0.381995	0.11	0.239643
6689	DB00121	biotin	1.64e-05	PC3	0.381731	0.14	0.249708
6303	DB00681	amphotericin B	4.4e-06	PC3	0.381057	0.11	0.239643
3193	DB12554	mebeverine	8.6e-06	MCF7	0.380783	0.12	0.242304
2260	DB11156	pyrantel	1.12e-05	MCF7	0.380739	0.15	0.252066
2452	DB01080	vigabatrin	3.1e-05	HL60	0.380653	0.15	0.252066
3339		amiprilose	1.18e-05	MCF7	0.380538	0.14	0.249708
5739	DB09028	cytisine	2.1e-05	PC3	0.380432	0.14	0.249708
5423	DB04365	arecoline	1.7e-05	MCF7	0.380356	0.11	0.239643
5919	DB05134	tanespimycin	1e-06	PC3	0.380239	0.1	0.235977
2323	DB00692	phentolamine	1.26e-05	MCF7	0.38006	0.11	0.239643
6646	DB00396	progesterone	1.28e-05	PC3	0.379804	0.09	0.231158
3702	DB06150	sulfadimethoxine	1.28e-05	PC3	0.379788	0.17	0.254354
6506		alfadolone	1.02e-05	MCF7	0.379715	0.1	0.235977
2233	DB13327	picotamide	1.02e-05	MCF7	0.379508	0.14	0.249708
3802	DB00780	phenelzine	1.7e-05	PC3	0.378563	0.12	0.242304
3885	DB00499	flutamide	1.44e-05	MCF7	0.37842	0.12	0.242304
4198	DB01021	trichlormethiazide	1.06e-05	PC3	0.378096	0.14	0.249708
873		trichostatin A	1e-06	MCF7	0.378065	0.08	0.223751
4473	DB00598	labetalol	1.1e-05	PC3	0.378013	0.18	0.256962
6699	DB00397	phenylpropanolamine	2.14e-05	PC3	0.377971	0.16	0.252719
5273	DB00502	haloperidol	1.06e-05	MCF7	0.377959	0.09	0.231158
401	DB02656	LY-294002	1e-05	ssMCF7	0.377895	0.19	0.260332
3992	DB03783	phenacetin	2.24e-05	PC3	0.377293	0.14	0.249708
4337	DB13431	proglumide	1.2e-05	PC3	0.376887	0.12	0.242304
3670		kawain	1.74e-05	PC3	0.376422	0.1	0.235977
3094	DB09213	dexibuprofen	1.94e-05	HL60	0.376206	0.15	0.252066
3055		thioperamide	9.8e-06	HL60	0.376177	0.19	0.260332
5449	DB01199	tubocurarine chloride	5.2e-06	MCF7	0.376032	0.2	0.264585
2286	DB13836	metampicillin	1.04e-05	MCF7	0.375957	0.13	0.246964
1237	DB00623	fluphenazine	1e-05	PC3	0.375941	0.19	0.260332
3199	DB01408	bambuterol	1e-05	MCF7	0.375213	0.11	0.239643
3976	DB13374	vincamine	1.12e-05	MCF7	0.374949	0.12	0.242304
4267	DB00618	demeclocycline	8e-06	PC3	0.374781	0.11	0.239643
2393	DB00860	prednisolone	1.1e-05	HL60	0.374471	0.09	0.231158
2201		foliosidine	1.3e-05	HL60	0.374437	0.12	0.242304
2678	DB05134	tanespimycin	1e-06	HL60	0.374167	0.12	0.242304
4433	DB00313	valproic acid	0.001	PC3	0.37366	0.11	0.239643
4228	DB00277	theophylline	2.02e-05	PC3	0.373571	0.14	0.249708
5568	DB00783	estradiol	1e-07	MCF7	0.373424	0.12	0.242304
2249		ampyrone	1.96e-05	MCF7	0.373241	0.14	0.249708
2620	DB01060	amoxicillin	1.1e-05	MCF7	0.373132	0.08	0.223751
4226		salsolidin	1.64e-05	PC3	0.373037	0.12	0.242304
3503	DB12017	ozagrel	1.52e-05	MCF7	0.372847	0.2	0.264585
3677	DB01001	salbutamol	1.68e-05	PC3	0.37284	0.13	0.246964
2214	DB01119	diazoxide	1.74e-05	MCF7	0.372739	0.07	0.218414
4006	DB01096	oxamniquine	1.44e-05	PC3	0.372733	0.18	0.256962
1546	DB01016	glibenclamide	8e-06	HL60	0.37257	0.13	0.246964
6426		0225151-0000	1e-05	PC3	0.372517	0.08	0.223751
6132	DB00979	cyclopentolate	1.22e-05	HL60	0.372177	0.16	0.252719
6127	DB01232	saquinavir	5.2e-06	HL60	0.37119	0.22	0.275621
2666	DB05134	tanespimycin	1e-06	HL60	0.371103	0.17	0.254354
5880	DB00623	fluphenazine	7.8e-06	PC3	0.371023	0.11	0.239643
2879	DB08989	etamivan	1.8e-05	MCF7	0.371005	0.08	0.223751
6623	DB13875	harmaline	1.4e-05	PC3	0.370793	0.14	0.249708
3190	DB08980	fendiline	1.14e-05	MCF7	0.370741	0.15	0.252066
5953	DB05134	tanespimycin	1e-06	MCF7	0.370522	0.14	0.249708
2284		mefexamide	1.26e-05	MCF7	0.37012	0.11	0.239643
3196		tremorine	1.5e-05	MCF7	0.369896	0.19	0.260332
5860	DB13642	pridinol	1.02e-05	PC3	0.369308	0.13	0.246964
4065	DB01037	selegiline	1.78e-05	PC3	0.369276	0.14	0.249708
4797		hydroxyachillin	1.42e-05	MCF7	0.368798	0.16	0.252719
3696	DB01326	cefamandole	8.2e-06	PC3	0.368704	0.2	0.264585
6503	DB00409	remoxipride	9.8e-06	MCF7	0.368246	0.14	0.249708
2797		seneciphylline	1.2e-05	MCF7	0.368082	0.1	0.235977
2738	DB00481	raloxifene	7.8e-06	HL60	0.367863	0.16	0.252719
3897	DB00874	guaifenesin	2.02e-05	MCF7	0.367819	0.19	0.260332
2275	DB04743	nimesulide	1.3e-05	MCF7	0.367812	0.19	0.260332
5801	DB00532	mephenytoin	1.84e-05	PC3	0.367374	0.16	0.252719
1544	DB00629	guanabenz	1.38e-05	MCF7	0.366682	0.15	0.252066
4491		altizide	1.04e-05	PC3	0.366505	0.1	0.235977
2529	DB14128	nadide	6e-06	HL60	0.366168	0.16	0.252719
1240	DB00313	valproic acid	0.0005	PC3	0.365744	0.05	0.210781
378	DB00864	tacrolimus	1e-06	MCF7	0.365722	0.07	0.218414
3899		lithocholic acid	1.06e-05	MCF7	0.365232	0.17	0.254354
2751	DB00165	pyridoxine	1.94e-05	MCF7	0.365014	0.06	0.213162
5925	DB01132	pioglitazone	1e-05	MCF7	0.364855	0.18	0.256962
7226	DB00670	pirenzepine	9.4e-06	MCF7	0.3642	0.1	0.235977
6152		piperacetazine	9.8e-06	HL60	0.364023	0.14	0.249708
3719	DB09018	bromopride	1.16e-05	PC3	0.363828	0.15	0.252066
3087	DB01054	nitrendipine	1.1e-05	HL60	0.363749	0.06	0.213162
448		trichostatin A	1e-07	PC3	0.363326	0.13	0.246964
3822		CP-320650-01	1e-05	PC3	0.363259	0.2	0.264585
454	DB14206	cobalt chloride	0.0001	MCF7	0.363116	0.16	0.252719
3823		CP-690334-01	1e-05	PC3	0.363051	0.17	0.254354
5498	DB00250	dapsone	1.62e-05	MCF7	0.36296	0.19	0.260332
283	DB04216	quercetin	1e-06	MCF7	0.362806	0.2	0.264585
6761	DB09093	chlortetracycline	7.8e-06	PC3	0.362652	0.12	0.242304
4690	DB01015	sulfamethoxazole	1.58e-05	MCF7	0.36254	0.12	0.242304
5726	DB00257	clotrimazole	1.16e-05	PC3	0.362347	0.16	0.252719
3230	DB01194	brinzolamide	1.04e-05	MCF7	0.361545	0.07	0.218414
4687	DB00400	griseofulvin	1.12e-05	MCF7	0.361433	0.13	0.246964
4141	DB00916	metronidazole	2.34e-05	MCF7	0.361315	0.14	0.249708
6728	DB00443	betamethasone	1.02e-05	PC3	0.360938	0.2	0.264585
4804	DB12831	gabexate	9.6e-06	MCF7	0.36088	0.17	0.254354
4349	DB00615	rifabutin	4.8e-06	MCF7	0.360572	0.13	0.246964
6919		scriptaid	1e-05	PC3	0.360333	0.1	0.235977
3066	DB00733	pralidoxime	2.32e-05	HL60	0.360128	0.14	0.249708
4640	DB01184	domperidone	7.4e-06	PC3	0.359527	0.19	0.260332
4078		tetroquinone	2.1e-05	PC3	0.359516	0.11	0.239643
5501	DB01074	perhexiline	1.02e-05	MCF7	0.358875	0.16	0.252719
2158	DB00376	trihexyphenidyl	1.18e-05	HL60	0.358872	0.18	0.256962
2894	DB00152	thiamine	1.18e-05	MCF7	0.358668	0.08	0.223751
4751	DB01009	ketoprofen	1.58e-05	MCF7	0.358596	0.1	0.235977
2557	DB01195	flecainide	8.4e-06	HL60	0.358525	0.12	0.242304
3726		6-benzylaminopurine	1.78e-05	PC3	0.358515	0.15	0.252066
5773	DB06709	methacholine chloride	2.04e-05	PC3	0.358023	0.12	0.242304
3366	DB01144	diclofenamide	1.32e-05	MCF7	0.358008	0.08	0.223751
6491	DB13251	octopamine	2.1e-05	MCF7	0.357508	0.14	0.249708
3700	DB13392	merbromin	5e-06	PC3	0.357408	0.08	0.223751
1521	DB00434	cyproheptadine	1.24e-05	MCF7	0.357354	0.07	0.218414
3703	DB00650	calcium folinate	7.8e-06	PC3	0.357305	0.13	0.246964
5926	DB00947	fulvestrant	1e-06	MCF7	0.357118	0.17	0.254354
2735	DB01331	cefoxitin	8.8e-06	HL60	0.357109	0.18	0.256962
4176	DB00521	carteolol	1.22e-05	MCF7	0.357094	0.17	0.254354
4373		lithocholic acid	1.06e-05	MCF7	0.357077	0.26	0.304181
2136	DB01049	co-dergocrine mesilate	6.4e-06	HL60	0.356993	0.12	0.242304
5586	DB05134	tanespimycin	1e-06	MCF7	0.356794	0.14	0.249708
6276		trichostatin A	1e-07	MCF7	0.356711	0.06	0.213162
5440	DB00458	imipramine	1.26e-05	MCF7	0.356632	0.13	0.246964
4019	DB01024	mycophenolic acid	1.24e-05	PC3	0.356482	0.25	0.296174
4075	DB01578	metrizamide	5e-06	PC3	0.356481	0.21	0.269571
5531	DB13785	dropropizine	1.7e-05	MCF7	0.356411	0.21	0.269571
6608	DB11820	nifurtimox	1.4e-05	PC3	0.356313	0.11	0.239643
2441	DB00681	amphotericin B	4.4e-06	HL60	0.356119	0.12	0.242304
3534	DB01359	penbutolol	5.8e-06	MCF7	0.355843	0.13	0.246964
5602	DB00877	sirolimus	1e-07	MCF7	0.355395	0.1	0.235977
5790		tropine	2.84e-05	PC3	0.355327	0.15	0.252066
6579		trichostatin A	1e-06	MCF7	0.355272	0.1	0.235977
4232		salsolinol	1.54e-05	PC3	0.354464	0.13	0.246964
3738		benzamil	1.12e-05	PC3	0.354334	0.19	0.260332
7494		15(S)-15-methylprostaglandin E2	1e-05	PC3	0.354013	0.18	0.256962
4823		fosfosal	1.84e-05	MCF7	0.353871	0.17	0.254354
2501	DB00469	tenoxicam	1.18e-05	HL60	0.353683	0.23	0.28167
2534		ramifenazone	1.42e-05	HL60	0.353351	0.18	0.256962
3515	DB13814	talampicillin	7.8e-06	MCF7	0.353161	0.14	0.249708
2273	DB01616	alverine	8.4e-06	MCF7	0.352838	0.15	0.252066
3877		santonin	1.62e-05	MCF7	0.35256	0.21	0.269571
6738	DB13670	oxantel	6.6e-06	PC3	0.352509	0.14	0.249708
4546	DB08936	chlorcyclizine	1.18e-05	PC3	0.351853	0.26	0.304181
6805	DB04284	stachydrine	2.22e-05	MCF7	0.351471	0.18	0.256962
4628	DB00265	crotamiton	1.96e-05	PC3	0.351387	0.18	0.256962
5491	DB06153	pizotifen	9.4e-06	MCF7	0.351149	0.14	0.249708
6445		meglumine	2.04e-05	MCF7	0.351091	0.21	0.269571
5906	DB14057	valinomycin	1e-07	MCF7	0.350939	0.1	0.235977
3061	DB07477	felbinac	1.88e-05	HL60	0.350873	0.15	0.252066
5638	DB00502	haloperidol	1.06e-05	MCF7	0.350749	0.21	0.269571
3975		ethisterone	1.28e-05	MCF7	0.350457	0.16	0.252719
3905		CP-320650-01	1e-05	MCF7	0.350057	0.13	0.246964
608		NU-1025	0.0001	MCF7	0.349023	0.15	0.252066
443	DB04557	arachidonic acid	1e-05	MCF7	0.348998	0.18	0.256962
6450	DB01099	flucytosine	3.1e-05	MCF7	0.348814	0.2	0.264585
4112		trichostatin A	1e-07	MCF7	0.348102	0.18	0.256962
2572		alpha-ergocryptine	7e-06	HL60	0.347926	0.2	0.264585
4982	DB13092	meclocycline	5.8e-06	MCF7	0.347759	0.1	0.235977
4202		trimethylcolchicinic acid	1.16e-05	PC3	0.347729	0.16	0.252719
2679		monorden	1e-07	HL60	0.347546	0.23	0.28167
4745	DB00978	lomefloxacin	1.04e-05	MCF7	0.347238	0.13	0.246964
6690	DB01099	flucytosine	3.1e-05	PC3	0.347078	0.23	0.28167
2699	DB02656	LY-294002	1e-05	HL60	0.34637	0.19	0.260332
3252	DB00115	cyanocobalamin	3e-06	MCF7	0.346277	0.09	0.231158
3111	DB04711	adipiodone	3.6e-06	HL60	0.34588	0.17	0.254354
3197	DB00695	furosemide	1.2e-05	MCF7	0.345596	0.14	0.249708
5795	DB00944	demecarium bromide	5.6e-06	PC3	0.345249	0.12	0.242304
3729	DB01009	ketoprofen	1.58e-05	PC3	0.344549	0.17	0.254354
4142	DB12029	chlorogenic acid	1.12e-05	MCF7	0.343931	0.26	0.304181
2403	DB01186	pergolide	9.8e-06	HL60	0.34373	0.09	0.231158
2535	DB00428	streptozocin	1.5e-05	HL60	0.343633	0.17	0.254354
2459	DB00336	nitrofural	2.02e-05	HL60	0.343452	0.18	0.256962
2944	DB01131	proguanil	1.38e-05	HL60	0.343258	0.09	0.231158
4506	DB03585	oxyphenbutazone	1.24e-05	PC3	0.343051	0.2	0.264585
2656	DB01092	ouabain	5.4e-06	MCF7	0.343015	0.11	0.239643
5538		enilconazole	1.34e-05	MCF7	0.34281	0.1	0.235977
4280	DB00809	tropicamide	1.4e-05	PC3	0.342797	0.16	0.252719
5964	DB00947	fulvestrant	1e-06	MCF7	0.342582	0.16	0.252719
3810	DB08936	chlorcyclizine	1.18e-05	PC3	0.342506	0.15	0.252066
2159	DB09355	sulfabenzamide	1.44e-05	HL60	0.342303	0.08	0.223751
6509	DB01218	halofantrine	7.4e-06	MCF7	0.34226	0.12	0.242304
5023	DB01188	ciclopirox	1.5e-05	MCF7	0.342102	0.21	0.269571
284	DB00864	tacrolimus	1e-06	MCF7	0.341806	0.13	0.246964
4261	DB01624	zuclopenthixol	9.2e-06	PC3	0.341559	0.16	0.252719
644	DB01394	colchicine	1e-07	MCF7	0.341361	0.07	0.218414
2627	DB01239	chlorprothixene	1.14e-05	MCF7	0.341342	0.14	0.249708
3116		atropine methonitrate	1.1e-05	HL60	0.341138	0.14	0.249708
4469	DB04284	stachydrine	2.22e-05	PC3	0.340433	0.18	0.256962
6734		metanephrine	1.72e-05	PC3	0.3404	0.16	0.252719
2564	DB01327	cefazolin	8.4e-06	HL60	0.339891	0.18	0.256962
437	DB01051	novobiocin	0.0001	MCF7	0.339778	0.14	0.249708
4466	DB00877	sirolimus	1e-07	PC3	0.339693	0.16	0.252719
5585	DB05134	tanespimycin	1e-06	MCF7	0.339617	0.21	0.269571
5233	DB02656	LY-294002	1e-05	MCF7	0.339292	0.13	0.246964
3335	DB13744	piromidic acid	1.38e-05	MCF7	0.337978	0.15	0.252066
455	DB00433	prochlorperazine	1e-05	MCF7	0.337488	0.21	0.269571
3049	DB14007	pentetic acid	1.02e-05	HL60	0.33705	0.15	0.252066
4071	DB01049	co-dergocrine mesilate	6.4e-06	PC3	0.337006	0.14	0.249708
2456	DB01188	ciclopirox	1.5e-05	HL60	0.336349	0.16	0.252719
4068	DB00527	cinchocaine	1.16e-05	PC3	0.336323	0.11	0.239643
1712	DB00954	dirithromycin	4.8e-06	HL60	0.335807	0.23	0.28167
6171		trichostatin A	1e-07	HL60	0.335479	0.16	0.252719
4080	DB01140	cefadroxil	1.1e-05	PC3	0.335439	0.16	0.252719
5635		thioperamide	9.8e-06	MCF7	0.334994	0.22	0.275621
6709		trichostatin A	1e-07	PC3	0.334645	0.24	0.288189
4206		pepstatin	5.8e-06	PC3	0.334254	0.22	0.275621
5992	DB01627	lincomycin	9e-06	MCF7	0.334056	0.16	0.252719
6468	DB00351	megestrol	1.04e-05	MCF7	0.33396	0.09	0.231158
3046		(+)-isoprenaline	1.1e-05	HL60	0.333792	0.2	0.264585
6037	DB09018	bromopride	1.16e-05	MCF7	0.333744	0.16	0.252719
6619		tracazolate	1.18e-05	PC3	0.332861	0.25	0.296174
6185	DB05134	tanespimycin	1e-06	HL60	0.332736	0.2	0.264585
5427	DB01148	flavoxate	9.4e-06	MCF7	0.332272	0.11	0.239643
6401		F0447-0125	1e-05	PC3	0.331742	0.16	0.252719
5749	DB00981	physostigmine	6.2e-06	PC3	0.331613	0.19	0.260332
6007		Trolox C	1.6e-05	MCF7	0.331368	0.12	0.242304
7313	DB13574	heptaminol	2.2e-05	PC3	0.331202	0.09	0.231158
3698	DB00226	guanadrel	7.6e-06	PC3	0.331139	0.25	0.296174
2166	DB13580	succinylsulfathiazole	1.12e-05	HL60	0.330997	0.1	0.235977
6167	DB00877	sirolimus	1e-07	HL60	0.330997	0.18	0.256962
2327	DB13374	vincamine	1.12e-05	MCF7	0.33089	0.18	0.256962
6664	DB00433	prochlorperazine	6.6e-06	PC3	0.33032	0.17	0.254354
2624	DB00882	clomifene	6.6e-06	MCF7	0.32918	0.19	0.260332
5511		trichostatin A	1e-07	MCF7	0.328962	0.21	0.269571
5541	DB00764	mometasone	7.6e-06	MCF7	0.327484	0.16	0.252719
4821		trichostatin A	1e-07	MCF7	0.327313	0.14	0.249708
4330		PHA-00851261E	1e-05	PC3	0.327064	0.15	0.252066
403		alpha-estradiol	1e-08	ssMCF7	0.326838	0.26	0.304181
2259	DB03604	tiratricol	6.4e-06	MCF7	0.326225	0.17	0.254354
5974		PF-00539745-00	1e-05	MCF7	0.326171	0.21	0.269571
2208		trichostatin A	1e-07	HL60	0.326096	0.16	0.252719
3394	DB01158	bretylium tosilate	9.6e-06	MCF7	0.32573	0.2	0.264585
2154	DB00222	glimepiride	8.2e-06	HL60	0.325684	0.08	0.223751
4187	DB00919	spectinomycin	9.8e-06	PC3	0.325264	0.17	0.254354
6639	DB11423	lasalocid	6.6e-06	PC3	0.324904	0.25	0.296174
4620	DB11622	dehydrocholic acid	9.6e-06	PC3	0.324493	0.17	0.254354
3800	DB01000	ciclacillin	1.18e-05	PC3	0.324279	0.14	0.249708
4177		gelsemine	1.24e-05	MCF7	0.324191	0.18	0.256962
2172		pempidine	1.3e-05	HL60	0.324137	0.1	0.235977
5728		tetrahydroalstonine	1.14e-05	PC3	0.323932	0.21	0.269571
450	DB05134	tanespimycin	1e-06	PC3	0.323338	0.17	0.254354
3695		atractyloside	5e-06	PC3	0.322842	0.15	0.252066
3605	DB13758	meclofenoxate	1.36e-05	MCF7	0.322711	0.15	0.252066
4635		androsterone	1.38e-05	PC3	0.322672	0.15	0.252066
5435	DB00868	benzonatate	6.6e-06	MCF7	0.321799	0.17	0.254354
4194	DB00205	pyrimethamine	1.6e-05	PC3	0.321745	0.19	0.260332
6731	DB01301	rolitetracycline	7.6e-06	PC3	0.321716	0.27	0.312999
3127		alfadolone	1.02e-05	HL60	0.32156	0.15	0.252066
3777		0317956-0000	1e-06	PC3	0.321544	0.16	0.252719
3873	DB00615	rifabutin	4.8e-06	MCF7	0.321442	0.26	0.304181
2164		Prestwick-682	6e-06	HL60	0.320309	0.11	0.239643
2992	DB00778	roxithromycin	4.8e-06	HL60	0.320027	0.15	0.252066
4430	DB05134	tanespimycin	1e-06	PC3	0.31966	0.17	0.254354
406		tetraethylenepentamine	0.0001	MCF7	0.319318	0.16	0.252719
3058		trichostatin A	1e-07	HL60	0.319	0.2	0.264585
4461	DB00623	fluphenazine	1e-05	PC3	0.318949	0.16	0.252719
5754	DB01003	cromoglicic acid	7.8e-06	PC3	0.318332	0.16	0.252719
7518		IC-86621	1e-06	PC3	0.317541	0.19	0.260332
4674	DB00712	flurbiprofen	1.64e-05	PC3	0.317445	0.15	0.252066
405		tetraethylenepentamine	1e-05	MCF7	0.316726	0.19	0.260332
307	DB00605	sulindac	5e-05	MCF7	0.316706	0.17	0.254354
1243	DB08059	wortmannin	1e-08	PC3	0.315786	0.11	0.239643
5526	DB00860	prednisolone	1.1e-05	MCF7	0.315739	0.08	0.223751
2211	DB00637	astemizole	8.8e-06	MCF7	0.315528	0.12	0.242304
4241		amprolium	1.26e-05	PC3	0.315525	0.19	0.260332
4557		CP-320650-01	1e-05	PC3	0.314964	0.18	0.256962
4233	DB00387	procyclidine	1.24e-05	PC3	0.314766	0.18	0.256962
3794	DB00991	oxaprozin	1.36e-05	PC3	0.31474	0.21	0.269571
6688	DB04840	debrisoquine	9e-06	PC3	0.314362	0.18	0.256962
5775	DB00699	nicergoline	8.2e-06	PC3	0.313906	0.16	0.252719
4001	DB00330	ethambutol	1.44e-05	PC3	0.312313	0.18	0.256962
6681	DB00773	etoposide	6.8e-06	PC3	0.312141	0.17	0.254354
4429	DB00947	fulvestrant	1e-06	PC3	0.311545	0.17	0.254354
4129	DB13867	fluticasone	8e-06	MCF7	0.310757	0.19	0.260332
4762	DB13044	gossypol	7.8e-06	MCF7	0.310113	0.21	0.269571
3198	DB00310	chlortalidone	1.18e-05	MCF7	0.309756	0.2	0.264585
5110	DB00355	aztreonam	9.2e-06	PC3	0.309432	0.19	0.260332
2269	DB08979	fenspiride	1.34e-05	MCF7	0.308604	0.14	0.249708
3753		famprofazone	1.06e-05	PC3	0.308438	0.18	0.256962
408	DB06819	sodium phenylbutyrate	0.001	MCF7	0.30831	0.16	0.252719
4344		trichostatin A	1e-07	PC3	0.30783	0.19	0.260332
6084		napelline	1.12e-05	MCF7	0.30771	0.17	0.254354
2540	DB01179	podophyllotoxin	9.6e-06	HL60	0.30771	0.19	0.260332
5979		PF-00539745-00	1e-05	PC3	0.307706	0.2	0.264585
5430	DB00721	procaine	1.46e-05	MCF7	0.306694	0.11	0.239643
282	DB00687	fludrocortisone	1e-06	MCF7	0.306083	0.2	0.264585
2701	DB00783	estradiol	1e-08	HL60	0.305071	0.19	0.260332
2669	DB00313	valproic acid	0.001	HL60	0.304753	0.16	0.252719
4320	DB00319	piperacillin	7.4e-06	PC3	0.303563	0.21	0.269571
5091	DB09186	nisoxetine	1.3e-05	PC3	0.303074	0.14	0.249708
3006	DB13216	oxolamine	9.2e-06	HL60	0.302925	0.12	0.242304
3849		acacetin	1.4e-05	MCF7	0.302008	0.19	0.260332
3045	DB07118	hymecromone	2.28e-05	HL60	0.301654	0.23	0.28167
3195	DB01082	streptomycin	2.8e-06	MCF7	0.301279	0.18	0.256962
5840	DB00951	isoniazid	2.92e-05	PC3	0.301099	0.12	0.242304
5458	DB04818	iproniazid	1.44e-05	MCF7	0.300957	0.24	0.288189
6691	DB01095	fluvastatin	9.2e-06	PC3	0.300384	0.19	0.260332
4250		Prestwick-967	2.58e-05	PC3	0.300239	0.26	0.304181
5118	DB13466	deptropine	7.6e-06	PC3	0.299965	0.26	0.304181
3130	DB01218	halofantrine	7.4e-06	HL60	0.29981	0.19	0.260332
2707		proadifen	1.02e-05	HL60	0.299542	0.24	0.288189
4480	DB00851	dacarbazine	2.2e-05	PC3	0.2987	0.3	0.341864
4245	DB11385	cefalonium	8.8e-06	PC3	0.298676	0.13	0.246964
3991		carbarsone	1.54e-05	PC3	0.298099	0.19	0.260332
314	DB06246	exisulind	5e-05	MCF7	0.297933	0.16	0.252719
6513	DB06153	pizotifen	9.4e-06	MCF7	0.297524	0.18	0.256962
505	DB05134	tanespimycin	1e-06	SKMEL5	0.297111	0.17	0.254354
2576		alexidine	6.8e-06	HL60	0.29679	0.25	0.296174
6071	DB00324	fluorometholone	1.06e-05	MCF7	0.296503	0.23	0.28167
3231		metitepine	8.4e-06	MCF7	0.295516	0.29	0.33146
2680	DB02546	vorinostat	1e-05	HL60	0.295322	0.18	0.256962
6143		trichostatin A	1e-07	HL60	0.294754	0.17	0.254354
483	DB00619	imatinib	1e-05	PC3	0.294427	0.18	0.256962
6725	DB13443	(-)-atenolol	1.5e-05	PC3	0.29346	0.2	0.264585
2262		scopolamine N-oxide	1e-05	MCF7	0.292975	0.16	0.252719
6323	DB01329	cefoperazone	5.8e-06	PC3	0.291948	0.24	0.288189
343	DB08162	fasudil	1e-05	MCF7	0.291777	0.21	0.269571
6174	DB00433	prochlorperazine	1e-05	HL60	0.291395	0.22	0.275621
6570	DB11296	Gly-His-Lys	1e-06	PC3	0.291316	0.1	0.235977
3707	DB13758	meclofenoxate	1.36e-05	PC3	0.290906	0.22	0.275621
3014	DB02329	carbenoxolone	6.6e-06	HL60	0.290875	0.18	0.256962
2704	DB00502	haloperidol	1e-05	HL60	0.289946	0.15	0.252066
1749	DB01426	ajmaline	1.22e-05	HL60	0.289289	0.22	0.275621
4328	DB13467	lanatoside C	4e-06	PC3	0.289122	0.16	0.252719
5436		scopolamine N-oxide	1e-05	MCF7	0.288503	0.16	0.252719
6440		AG-013608	1e-05	PC3	0.28767	0.25	0.296174
3020	DB01203	nadolol	1.3e-05	HL60	0.287535	0.2	0.264585
6733	DB00495	zidovudine	1.5e-05	PC3	0.287193	0.13	0.246964
6420	DB01083	orlistat	1e-05	PC3	0.286861	0.2	0.264585
5921	DB00679	thioridazine	1e-05	PC3	0.285815	0.23	0.28167
2196	DB00754	ethotoin	1.96e-05	HL60	0.285026	0.14	0.249708
407	DB06819	sodium phenylbutyrate	0.001	MCF7	0.28463	0.17	0.254354
3528	DB09313	ioxaglic acid	3.2e-06	MCF7	0.284378	0.14	0.249708
1540	DB00850	perphenazine	1e-05	MCF7	0.283767	0.16	0.252719
449		monorden	1e-07	PC3	0.283441	0.23	0.28167
2578	DB06150	sulfadimethoxine	1.28e-05	HL60	0.281426	0.19	0.260332
5958	DB05134	tanespimycin	1e-06	PC3	0.280703	0.23	0.28167
3972	DB13431	proglumide	1.2e-05	MCF7	0.279734	0.19	0.260332
2726		bergenin	1.16e-05	HL60	0.279674	0.19	0.260332
6645	DB01067	glipizide	9e-06	PC3	0.278531	0.18	0.256962
5764	DB00871	terbutaline	7.2e-06	PC3	0.277138	0.19	0.260332
5463	DB08954	ifenprodil	8.4e-06	MCF7	0.276231	0.19	0.260332
2673	DB12442	alvespimycin	1e-07	HL60	0.275804	0.23	0.28167
6200	DB00783	estradiol	1e-08	HL60	0.27532	0.15	0.252066
3712	DB00663	flumetasone	9.8e-06	PC3	0.275013	0.19	0.260332
3109	DB00626	bacitracin	2.8e-06	HL60	0.270519	0.1	0.235977
4255		(+/-)-catechin	1.38e-05	PC3	0.270194	0.26	0.304181
6716	DB02691	glycocholic acid	8.6e-06	PC3	0.266791	0.24	0.288189
4460	DB02656	LY-294002	1e-05	PC3	0.265514	0.28	0.32196
3987		6-azathymine	3.14e-05	PC3	0.263086	0.16	0.252719
366	DB00619	imatinib	1e-05	MCF7	0.259643	0.24	0.288189
3028	DB04570	latamoxef	7e-06	HL60	0.257735	0.3	0.341864
3812	DB00255	diethylstilbestrol	1.5e-05	PC3	0.256004	0.24	0.288189
311	DB04331	monastrol	0.0001	MCF7	0.245464	0.24	0.288189
4249	DB08951	indoprofen	1.42e-05	PC3	0.232094	0.23	0.28167
4341	DB13374	vincamine	1.12e-05	PC3	0.227891	0.29	0.33146
484		monorden	1e-07	PC3	0.218406	0.35	0.396251
1	DB00331	metformin	1e-05	MCF7	0	0.22	0.275621
2	DB00331	metformin	1e-05	MCF7	0	0.16	0.252719
3	DB00331	metformin	1e-07	MCF7	0	0.2	0.264585
21	DB00914	phenformin	1e-05	MCF7	0	0.1	0.235977
22		phenyl biguanide	1e-05	MCF7	0	0.23	0.28167
61	DB00331	metformin	1e-05	MCF7	0	0.14	0.249708
121	DB00783	estradiol	1e-08	MCF7	0	0.08	0.223751
122		alpha-estradiol	1e-08	MCF7	0	0.04	0.203164
123	DB01234	dexamethasone	1e-06	MCF7	0	0.09	0.231158
124	DB00244	mesalazine	0.0001	MCF7	0	0.04	0.203164
141	DB00672	chlorpropamide	0.0001	MCF7	0	0.11	0.239643
143	DB00675	tamoxifen	1e-06	MCF7	0	0.1	0.235977
144	DB00672	chlorpropamide	0.0001	MCF7	0	0.07	0.218414
161	DB00661	verapamil	1e-05	MCF7	0	0.01	0.1525
164	DB14063	dexverapamil	1e-05	MCF7	0	0.02	0.177068
165	DB00990	exemestane	1e-08	MCF7	0	0.03	0.18866
166	DB00533	rofecoxib	1e-05	MCF7	0	0.01	0.1525
167	DB00321	amitriptyline	1e-06	MCF7	0	0.17	0.254354
169	DB00864	tacrolimus	1e-06	MCF7	0	0.15	0.252066
201		15-delta prostaglandin J2	1e-05	MCF7	0	0.2	0.264585
202	DB00481	raloxifene	1e-07	MCF7	0	0.07	0.218414
204	DB00795	sulfasalazine	0.0001	MCF7	0	0.14	0.249708
205	DB00533	rofecoxib	1e-05	MCF7	0	0.2	0.264585
206	DB00482	celecoxib	1e-05	MCF7	0	0.1	0.235977
207		LM-1685	1e-05	MCF7	0	0.16	0.252719
208		SC-58125	1e-05	MCF7	0	0.18	0.256962
221	DB05134	tanespimycin	1e-07	MCF7	0	0.27	0.312999
252	DB00482	celecoxib	1e-05	MCF7	0	0.29	0.33146
254		SC-58125	1e-05	MCF7	0	0.24	0.288189
255	DB01234	dexamethasone	1e-06	MCF7	0	0.27	0.312999
256	DB00533	rofecoxib	1e-05	MCF7	0	0.31	0.352338
262	DB00328	indometacin	2e-05	MCF7	0	0.24	0.288189
265	DB00860	prednisolone	1e-06	MCF7	0	0.3	0.341864
266	DB01041	thalidomide	0.0001	MCF7	0	0.29	0.33146
267	DB01645	genistein	1e-06	MCF7	0	0.28	0.32196
268	DB01645	genistein	1e-06	MCF7	0	0.35	0.396251
308		sulindac sulfide	5e-05	MCF7	0	0.14	0.249708
309	DB06246	exisulind	5e-05	MCF7	0	0.16	0.252719
317		N-phenylanthranilic acid	1e-05	MCF7	0	0.24	0.288189
325		monorden	1e-07	MCF7	0	0.12	0.242304
331		trichostatin A	1e-07	MCF7	0	0.26	0.304181
333	DB00586	diclofenac	1e-05	MCF7	0	0.16	0.252719
341	DB06819	sodium phenylbutyrate	0.0001	MCF7	0	0.15	0.252066
345	DB00313	valproic acid	0.01	MCF7	0	0.24	0.288189
348	DB00313	valproic acid	5e-05	MCF7	0	0.17	0.254354
361	DB02656	LY-294002	1e-05	HL60	0	0.28	0.32196
362	DB00877	sirolimus	1e-07	HL60	0	0.21	0.269571
363	DB06819	sodium phenylbutyrate	0.0001	HL60	0	0.2	0.264585
364		trichostatin A	1e-07	HL60	0	0.18	0.256962
369	DB00412	rosiglitazone	1e-05	HL60	0	0.09	0.231158
370	DB00197	troglitazone	1e-05	HL60	0	0.17	0.254354
371	DB00533	rofecoxib	1e-05	HL60	0	0.14	0.249708
373	DB00783	estradiol	1e-08	ssMCF7	0	0.21	0.269571
374	DB01234	dexamethasone	1e-06	ssMCF7	0	0.14	0.249708
376	DB00481	raloxifene	1e-07	ssMCF7	0	0.17	0.254354
377	DB00482	celecoxib	1e-05	MCF7	0	0.11	0.239643
379	DB14206	cobalt chloride	0.0001	MCF7	0	0.1	0.235977
380	DB00675	tamoxifen	1e-06	MCF7	0	0.06	0.213162
383	DB14206	cobalt chloride	0.0001	MCF7	0	0.17	0.254354
387	DB00783	estradiol	1e-08	HL60	0	0.15	0.252066
388	DB00481	raloxifene	1e-07	HL60	0	0.2	0.264585
402	DB00877	sirolimus	1e-07	ssMCF7	0	0.17	0.254354
404	DB08059	wortmannin	1e-08	ssMCF7	0	0.26	0.304181
412		tetraethylenepentamine	0.0001	HL60	0	0.15	0.252066
413		trichostatin A	1e-07	ssMCF7	0	0.31	0.352338
414	DB00783	estradiol	1e-08	ssMCF7	0	0.17	0.254354
415	DB00179	nordihydroguaiaretic acid	1e-06	ssMCF7	0	0.13	0.246964
416	DB00363	clozapine	1e-05	MCF7	0	0.2	0.264585
417	DB00679	thioridazine	1e-05	MCF7	0	0.15	0.252066
418	DB00502	haloperidol	1e-05	MCF7	0	0.17	0.254354
419	DB00477	chlorpromazine	1e-05	MCF7	0	0.15	0.252066
422	DB00679	thioridazine	1e-06	MCF7	0	0.18	0.256962
424	DB02656	LY-294002	1e-07	MCF7	0	0.1	0.235977
428	DB05134	tanespimycin	1e-06	MCF7	0	0.11	0.239643
429	DB02656	LY-294002	1e-05	PC3	0	0.16	0.252719
431	DB00197	troglitazone	1e-05	PC3	0	0.25	0.296174
434	DB06819	sodium phenylbutyrate	0.001	PC3	0	0.26	0.304181
438	DB06778	copper sulfate	0.0001	MCF7	0	0.22	0.275621
439	DB03940	oxamic acid	0.01	MCF7	0	0.17	0.254354
440		W-13	1e-05	MCF7	0	0.18	0.256962
442		oligomycin	1e-06	MCF7	0	0.25	0.296174
444	DB00636	clofibrate	0.0001	MCF7	0	0.15	0.252066
445	DB00586	diclofenac	1e-05	PC3	0	0.17	0.254354
446		15-delta prostaglandin J2	1e-05	PC3	0	0.21	0.269571
447	DB00755	tretinoin	1e-06	PC3	0	0.17	0.254354
451	DB02877	TTNPB	1e-07	PC3	0	0.18	0.256962
453	DB00328	indometacin	0.0001	MCF7	0	0.14	0.249708
456		quinpirole	1e-06	MCF7	0	0.2	0.264585
457		tetraethylenepentamine	0.0001	PC3	0	0.09	0.231158
458	DB00313	valproic acid	0.001	PC3	0	0.11	0.239643
459	DB06778	copper sulfate	0.0001	PC3	0	0.02	0.177068
461	DB02656	LY-294002	1e-05	PC3	0	0.16	0.252719
462	DB00197	troglitazone	1e-05	PC3	0	0.17	0.254354
463	DB00533	rofecoxib	1e-05	PC3	0	0.22	0.275621
464		pirinixic acid	0.0001	PC3	0	0.15	0.252066
482	DB00482	celecoxib	1e-05	PC3	0	0.28	0.32196
486		calmidazolium	5e-06	MCF7	0	0.26	0.304181
487		pirinixic acid	0.0001	MCF7	0	0.19	0.260332
493		monorden	1e-07	SKMEL5	0	0.19	0.260332
495		pirinixic acid	0.0001	SKMEL5	0	0.15	0.252066
496	DB01088	iloprost	1e-06	SKMEL5	0	0.24	0.288189
497	DB00313	valproic acid	0.001	ssMCF7	0	0.18	0.256962
498		tetraethylenepentamine	0.0001	ssMCF7	0	0.18	0.256962
499	DB01051	novobiocin	0.0001	ssMCF7	0	0.23	0.28167
501	DB02656	LY-294002	1e-05	SKMEL5	0	0.19	0.260332
502	DB06819	sodium phenylbutyrate	0.0002	SKMEL5	0	0.24	0.288189
504	DB00197	troglitazone	1e-05	SKMEL5	0	0.17	0.254354
506	DB08059	wortmannin	1e-08	SKMEL5	0	0.15	0.252066
508	DB02010	staurosporine	1e-08	SKMEL5	0	0.21	0.269571
541	DB00317	gefitinib	1e-05	HL60	0	0.13	0.246964
543		1,5-isoquinolinediol	0.0001	HL60	0	0.08	0.223751
573	DB00746	deferoxamine	0.0001	MCF7	0	0.18	0.256962
574		tetraethylenepentamine	0.0001	MCF7	0	0.16	0.252719
576	DB01051	novobiocin	0.0001	MCF7	0	0.27	0.312999
578		4,5-dianilinophthalimide	1e-05	PC3	0	0.02	0.177068
583		HNMPA-(AM)3	5e-06	PC3	0	0.16	0.252719
590		3-aminobenzamide	0.01	MCF7	0	0.1	0.235977
591	DB13242	bucladesine	2e-05	MCF7	0	0.13	0.246964
592	DB01599	probucol	1e-05	MCF7	0	0.05	0.210781
593	DB02424	geldanamycin	1e-06	MCF7	0	0.15	0.252066
595	DB02709	resveratrol	5e-05	MCF7	0	0.16	0.252719
596	DB04331	monastrol	0.0001	MCF7	0	0.12	0.242304
605	DB04331	monastrol	2e-05	MCF7	0	0.21	0.269571
610	DB04331	monastrol	0.0001	MCF7	0	0.21	0.269571
611	DB02424	geldanamycin	1e-06	MCF7	0	0.08	0.223751
612		LM-1685	1e-05	MCF7	0	0.11	0.239643
614	DB04331	monastrol	2e-05	MCF7	0	0	0
621	DB08313	nocodazole	1e-06	MCF7	0	0	0
622	DB02709	resveratrol	5e-05	MCF7	0	0	0
624		4,5-dianilinophthalimide	1e-05	MCF7	0	0	0
627	DB04331	monastrol	0.0001	MCF7	0	0.02	0.177068
629	DB00313	valproic acid	0.001	SKMEL5	0	0.04	0.203164
630	DB01394	colchicine	1e-06	SKMEL5	0	0	0
631	DB12783	benserazide	1e-05	SKMEL5	0	0.02	0.177068
639	DB00738	pentamidine	0.0001	MCF7	0	0.16	0.252719
640	DB01229	paclitaxel	1e-07	MCF7	0	0.12	0.242304
641	DB12783	benserazide	1e-05	MCF7	0	0.22	0.275621
642	DB00352	tioguanine	1e-05	MCF7	0	0.14	0.249708
643		W-13	1e-05	MCF7	0	0.13	0.246964
661		splitomicin	2e-05	PC3	0	0.11	0.239643
662	DB02709	resveratrol	5e-05	PC3	0	0.1	0.235977
664		docosahexaenoic acid ethyl ester	0.0001	PC3	0	0.18	0.256962
665	DB00783	estradiol	1e-08	PC3	0	0.12	0.242304
666		butirosin	1e-05	PC3	0	0.07	0.218414
667	DB01033	mercaptopurine	1e-05	PC3	0	0.15	0.252066
681	DB04331	monastrol	0.0001	MCF7	0	0	0
702		alpha-estradiol	1e-08	PC3	0	0.06	0.213162
703	DB01645	genistein	1e-05	PC3	0	0.03	0.18866
762		alpha-estradiol	1e-08	MCF7	0	0.07	0.218414
782	DB00783	estradiol	1e-08	HL60	0	0.03	0.18866
783	DB02587	colforsin	5e-05	HL60	0	0	0
825		rottlerin	1e-05	MCF7	0	0.04	0.203164
826	DB00457	prazosin	1e-05	MCF7	0	0.05	0.210781
828		5252917	1.4e-05	MCF7	0	0.04	0.203164
831	DB05134	tanespimycin	1e-06	MCF7	0	0.01	0.1525
832		Y-27632	3e-06	MCF7	0	0.03	0.18866
833		5255229	1.3e-05	MCF7	0	0.03	0.18866
834		5211181	1.2e-05	MCF7	0	0.06	0.213162
835	DB00564	carbamazepine	1e-07	MCF7	0	0.02	0.177068
836		monorden	1e-07	MCF7	0	0.02	0.177068
837		blebbistatin	1.7e-05	MCF7	0	0.01	0.1525
838		5248896	1.1e-05	MCF7	0	0.01	0.1525
839		5224221	1.2e-05	MCF7	0	0.05	0.210781
842	DB13242	bucladesine	2e-06	MCF7	0	0.03	0.18866
843		5279552	2.2e-05	MCF7	0	0.02	0.177068
844		5253409	1.7e-05	MCF7	0	0.03	0.18866
848	DB01023	felodipine	1e-05	MCF7	0	0.03	0.18866
849	DB00755	tretinoin	1e-06	MCF7	0	0.08	0.223751
863	DB00991	oxaprozin	0.0003	MCF7	0	0.03	0.18866
864	DB02424	geldanamycin	1e-06	MCF7	0	0.1	0.235977
866		ikarugamycin	2e-06	MCF7	0	0.11	0.239643
868		5182598	2.5e-05	MCF7	0	0.04	0.203164
869	DB08059	wortmannin	1e-06	MCF7	0	0.09	0.231158
870	DB06816	pyrvinium	1.25e-06	MCF7	0	0.09	0.231158
871		ionomycin	2e-06	MCF7	0	0.04	0.203164
874		depudecin	1e-06	MCF7	0	0.04	0.203164
881		docosahexaenoic acid ethyl ester	0.0001	MCF7	0	0.07	0.218414
882		ionomycin	2e-06	MCF7	0	0.07	0.218414
885		5186223	1.2e-05	MCF7	0	0.09	0.231158
887		celastrol	2.5e-06	MCF7	0	0.02	0.177068
889		5286656	5e-05	MCF7	0	0.05	0.210781
890		5149715	1e-05	MCF7	0	0.03	0.18866
892		5162773	7e-06	MCF7	0	0.01	0.1525
893		pararosaniline	1e-05	MCF7	0	0.01	0.1525
896		5152487	1e-05	MCF7	0	0.03	0.18866
898		5213008	1.8e-05	MCF7	0	0.03	0.18866
900		5186324	2e-06	MCF7	0	0.05	0.210781
903		5151277	1.4e-05	MCF7	0	0.05	0.210781
905	DB00257	clotrimazole	5e-05	MCF7	0	0.05	0.210781
908		5140203	1.5e-05	MCF7	0	0.01	0.1525
910	DB00831	trifluoperazine	1e-05	MCF7	0	0.01	0.1525
915	DB00273	topiramate	3e-06	MCF7	0	0.05	0.210781
917	DB04216	quercetin	1e-06	MCF7	0	0.07	0.218414
918		ikarugamycin	2e-06	MCF7	0	0.02	0.177068
919	DB00564	carbamazepine	1e-07	MCF7	0	0.07	0.218414
920	DB01262	decitabine	1e-07	MCF7	0	0.04	0.203164
921	DB00877	sirolimus	1e-07	MCF7	0	0.07	0.218414
922	DB00482	celecoxib	1e-05	MCF7	0	0.14	0.249708
941		rottlerin	1e-05	MCF7	0	0.04	0.203164
942	DB00457	prazosin	1e-05	MCF7	0	0.07	0.218414
944		5252917	1.4e-05	MCF7	0	0.02	0.177068
947	DB05134	tanespimycin	1e-06	MCF7	0	0.02	0.177068
948		Y-27632	3e-06	MCF7	0	0.03	0.18866
949		5255229	1.3e-05	MCF7	0	0.03	0.18866
950		5211181	1.2e-05	MCF7	0	0.01	0.1525
952	DB00564	carbamazepine	1e-07	MCF7	0	0.02	0.177068
953		monorden	1e-07	MCF7	0	0.02	0.177068
954		blebbistatin	1.7e-05	MCF7	0	0.01	0.1525
955		5248896	1.1e-05	MCF7	0	0.04	0.203164
956		5224221	1.2e-05	MCF7	0	0.03	0.18866
958	DB02709	resveratrol	1e-05	MCF7	0	0.01	0.1525
959	DB13242	bucladesine	2e-06	MCF7	0	0	0
960		5279552	2.2e-05	MCF7	0	0.02	0.177068
961		5253409	1.7e-05	MCF7	0	0.04	0.203164
965	DB01023	felodipine	1e-05	MCF7	0	0	0
966	DB00755	tretinoin	1e-06	MCF7	0	0.03	0.18866
970		5230742	1.7e-05	MCF7	0	0.01	0.1525
971	DB00991	oxaprozin	0.0003	MCF7	0	0.01	0.1525
972	DB02424	geldanamycin	1e-06	MCF7	0	0.03	0.18866
974		ikarugamycin	2e-06	MCF7	0	0.03	0.18866
976		5182598	2.5e-05	MCF7	0	0.01	0.1525
978	DB06816	pyrvinium	1.25e-06	MCF7	0	0.08	0.223751
979		ionomycin	2e-06	MCF7	0	0.05	0.210781
983	DB00502	haloperidol	1e-05	MCF7	0	0.04	0.203164
984	DB00945	acetylsalicylic acid	0.0001	MCF7	0	0.03	0.18866
985	DB00947	fulvestrant	1e-06	MCF7	0	0.03	0.18866
986	DB05134	tanespimycin	1e-06	MCF7	0	0.01	0.1525
987	DB00877	sirolimus	1e-07	MCF7	0	0.07	0.218414
988	DB00783	estradiol	1e-07	MCF7	0	0.06	0.213162
989	DB00313	valproic acid	0.001	MCF7	0	0.04	0.203164
991	DB00755	tretinoin	1e-06	MCF7	0	0.07	0.218414
993	DB12442	alvespimycin	1e-07	MCF7	0	0.07	0.218414
994	DB00313	valproic acid	0.0002	MCF7	0	0.01	0.1525
995	DB00433	prochlorperazine	1e-05	MCF7	0	0.06	0.213162
996	DB02656	LY-294002	1e-07	MCF7	0	0.03	0.18866
997	DB00477	chlorpromazine	1e-06	MCF7	0	0.01	0.1525
998	DB05134	tanespimycin	1e-06	MCF7	0	0.03	0.18866
999		monorden	1e-07	MCF7	0	0.03	0.18866
1000	DB02546	vorinostat	1e-05	MCF7	0	0.02	0.177068
1002	DB00313	valproic acid	5e-05	MCF7	0	0.02	0.177068
1003	DB00179	nordihydroguaiaretic acid	1e-06	MCF7	0	0.02	0.177068
1005	DB05134	tanespimycin	1e-06	MCF7	0	0.04	0.203164
1006	DB05134	tanespimycin	1e-06	MCF7	0	0.01	0.1525
1007	DB02656	LY-294002	1e-05	MCF7	0	0.01	0.1525
1008	DB02424	geldanamycin	1e-06	MCF7	0	0.01	0.1525
1009	DB00363	clozapine	1e-05	MCF7	0	0.03	0.18866
1010	DB00679	thioridazine	1e-05	MCF7	0	0.05	0.210781
1011		15-delta prostaglandin J2	1e-05	MCF7	0	0.03	0.18866
1012	DB00197	troglitazone	1e-05	MCF7	0	0.04	0.203164
1013	DB00412	rosiglitazone	1e-05	MCF7	0	0.02	0.177068
1014		trichostatin A	1e-06	MCF7	0	0.08	0.223751
1015	DB01645	genistein	1e-05	MCF7	0	0	0
1016	DB02656	LY-294002	1e-05	MCF7	0	0.05	0.210781
1017	DB00623	fluphenazine	1e-05	MCF7	0	0.05	0.210781
1019	DB02656	LY-294002	1e-05	MCF7	0	0.01	0.1525
1020	DB00313	valproic acid	0.0005	MCF7	0	0.07	0.218414
1021	DB00783	estradiol	1e-08	MCF7	0	0.08	0.223751
1022	DB00877	sirolimus	1e-07	MCF7	0	0.01	0.1525
1024	DB00502	haloperidol	1e-05	MCF7	0	0.06	0.213162
1041	DB00502	haloperidol	1e-05	MCF7	0	0	0
1042	DB00945	acetylsalicylic acid	0.0001	MCF7	0	0	0
1043	DB00947	fulvestrant	1e-06	MCF7	0	0	0
1044	DB05134	tanespimycin	1e-06	MCF7	0	0	0
1045	DB00877	sirolimus	1e-07	MCF7	0	0	0
1047	DB00313	valproic acid	0.001	MCF7	0	0	0
1048		alpha-estradiol	1e-08	MCF7	0	0	0
1049	DB00755	tretinoin	1e-06	MCF7	0	0	0
1050		trichostatin A	1e-07	MCF7	0	0	0
1051	DB12442	alvespimycin	1e-07	MCF7	0	0	0
1053	DB00433	prochlorperazine	1e-05	MCF7	0	0.01	0.1525
1054	DB02656	LY-294002	1e-07	MCF7	0	0	0
1055	DB00477	chlorpromazine	1e-06	MCF7	0	0	0
1056	DB05134	tanespimycin	1e-06	MCF7	0	0	0
1057		monorden	1e-07	MCF7	0	0.01	0.1525
1059	DB00877	sirolimus	1e-07	MCF7	0	0	0
1060	DB00313	valproic acid	5e-05	MCF7	0	0	0
1061	DB00179	nordihydroguaiaretic acid	1e-06	MCF7	0	0	0
1063	DB05134	tanespimycin	1e-06	MCF7	0	0.01	0.1525
1064	DB05134	tanespimycin	1e-06	MCF7	0	0	0
1065	DB02656	LY-294002	1e-05	MCF7	0	0	0
1066	DB02424	geldanamycin	1e-06	MCF7	0	0.03	0.18866
1069		15-delta prostaglandin J2	1e-05	MCF7	0	0	0
1070	DB00197	troglitazone	1e-05	MCF7	0	0.01	0.1525
1071	DB00412	rosiglitazone	1e-05	MCF7	0	0.01	0.1525
1073	DB01645	genistein	1e-05	MCF7	0	0.04	0.203164
1074	DB02656	LY-294002	1e-05	MCF7	0	0.01	0.1525
1075	DB00623	fluphenazine	1e-05	MCF7	0	0.01	0.1525
1076	DB00947	fulvestrant	1e-08	MCF7	0	0.02	0.177068
1077	DB02656	LY-294002	1e-05	MCF7	0	0	0
1078	DB00313	valproic acid	0.0005	MCF7	0	0.05	0.210781
1079	DB00783	estradiol	1e-08	MCF7	0	0	0
1080	DB00877	sirolimus	1e-07	MCF7	0	0.01	0.1525
1081	DB08059	wortmannin	1e-08	MCF7	0	0.02	0.177068
1082	DB00502	haloperidol	1e-05	MCF7	0	0.03	0.18866
1101		(-)-catechin	1.1e-05	MCF7	0	0	0
1103	DB13318	demecolcine	1.17e-05	MCF7	0	0.02	0.177068
1105	DB11430	monensin	1.09e-05	MCF7	0	0.01	0.1525
1108		12,13-EODE	2e-07	MCF7	0	0	0
1109		3-hydroxy-DL-kynurenine	9.2e-06	MCF7	0	0.01	0.1525
1112		trichostatin A	1e-07	MCF7	0	0.01	0.1525
1113	DB00254	doxycycline	1.44e-05	MCF7	0	0.01	0.1525
1115		phenanthridinone	5.12e-05	MCF7	0	0	0
1119	DB01392	yohimbine	2.29e-05	MCF7	0	0.01	0.1525
1121		DL-PPMP	2e-06	MCF7	0	0.02	0.177068
1122		cytochalasin B	2.08e-05	MCF7	0	0.01	0.1525
1132		BW-B70C	3.16e-05	MCF7	0	0.01	0.1525
1135	DB01017	minocycline	1.05e-05	MCF7	0	0.04	0.203164
1138	DB00692	phentolamine	1.15e-05	MCF7	0	0.02	0.177068
1140		MG-132	2.1e-05	MCF7	0	0	0
1141		tyrphostin AG-1478	3.16e-05	MCF7	0	0.03	0.18866
1147	DB05134	tanespimycin	1e-06	HL60	0	0.02	0.177068
1150	DB00313	valproic acid	0.001	HL60	0	0.07	0.218414
1151		alpha-estradiol	1e-08	HL60	0	0.01	0.1525
1152	DB00755	tretinoin	1e-06	HL60	0	0.03	0.18866
1154	DB12442	alvespimycin	1e-07	HL60	0	0.04	0.203164
1155	DB00313	valproic acid	0.0002	HL60	0	0.03	0.18866
1157	DB02656	LY-294002	1e-07	HL60	0	0.01	0.1525
1158	DB00477	chlorpromazine	1e-06	HL60	0	0.01	0.1525
1159	DB05134	tanespimycin	1e-06	HL60	0	0.02	0.177068
1160		monorden	1e-07	HL60	0	0.06	0.213162
1163	DB00313	valproic acid	5e-05	HL60	0	0.05	0.210781
1164	DB00179	nordihydroguaiaretic acid	1e-06	HL60	0	0.03	0.18866
1168	DB02656	LY-294002	1e-05	HL60	0	0.03	0.18866
1169	DB02424	geldanamycin	1e-06	HL60	0	0.03	0.18866
1172		15-delta prostaglandin J2	1e-05	HL60	0	0.09	0.231158
1173	DB00197	troglitazone	1e-05	HL60	0	0.02	0.177068
1174	DB00412	rosiglitazone	1e-05	HL60	0	0.03	0.18866
1176	DB01645	genistein	1e-05	HL60	0	0.01	0.1525
1177	DB02656	LY-294002	1e-05	HL60	0	0.08	0.223751
1178	DB00623	fluphenazine	1e-05	HL60	0	0.02	0.177068
1179	DB00947	fulvestrant	1e-08	HL60	0	0.1	0.235977
1181	DB00313	valproic acid	0.0005	HL60	0	0.05	0.210781
1182	DB00783	estradiol	1e-08	HL60	0	0.01	0.1525
1185	DB00502	haloperidol	1e-05	HL60	0	0.07	0.218414
1203	DB00502	haloperidol	1e-05	PC3	0	0.06	0.213162
1204	DB00945	acetylsalicylic acid	0.0001	PC3	0	0.05	0.210781
1207	DB00877	sirolimus	1e-07	PC3	0	0.07	0.218414
1208	DB00783	estradiol	1e-07	PC3	0	0.1	0.235977
1209	DB00313	valproic acid	0.001	PC3	0	0.1	0.235977
1210		alpha-estradiol	1e-08	PC3	0	0.05	0.210781
1212		trichostatin A	1e-07	PC3	0	0.09	0.231158
1213	DB12442	alvespimycin	1e-07	PC3	0	0.02	0.177068
1214	DB00313	valproic acid	0.0002	PC3	0	0.1	0.235977
1216	DB02656	LY-294002	1e-07	PC3	0	0.05	0.210781
1217	DB00477	chlorpromazine	1e-06	PC3	0	0.08	0.223751
1218	DB05134	tanespimycin	1e-06	PC3	0	0.11	0.239643
1219		monorden	1e-07	PC3	0	0.06	0.213162
1220	DB02546	vorinostat	1e-05	PC3	0	0.02	0.177068
1222	DB00313	valproic acid	5e-05	PC3	0	0.05	0.210781
1223	DB00179	nordihydroguaiaretic acid	1e-06	PC3	0	0.08	0.223751
1225	DB05134	tanespimycin	1e-06	PC3	0	0.05	0.210781
1226	DB05134	tanespimycin	1e-06	PC3	0	0.1	0.235977
1227	DB02656	LY-294002	1e-05	PC3	0	0.05	0.210781
1228	DB02424	geldanamycin	1e-06	PC3	0	0.04	0.203164
1229	DB00363	clozapine	1e-05	PC3	0	0.12	0.242304
1232	DB00197	troglitazone	1e-05	PC3	0	0.06	0.213162
1233	DB00412	rosiglitazone	1e-05	PC3	0	0.13	0.246964
1234		trichostatin A	1e-06	PC3	0	0.13	0.246964
1235	DB01645	genistein	1e-05	PC3	0	0.13	0.246964
1236	DB02656	LY-294002	1e-05	PC3	0	0.06	0.213162
1238	DB00947	fulvestrant	1e-08	PC3	0	0.1	0.235977
1239	DB02656	LY-294002	1e-05	PC3	0	0.18	0.256962
1241	DB00783	estradiol	1e-08	PC3	0	0.14	0.249708
1244	DB00502	haloperidol	1e-05	PC3	0	0.18	0.256962
1263	DB01035	procainamide	1.48e-05	HL60	0	0.05	0.210781
1264		thioguanosine	1.26e-05	HL60	0	0	0
1265	DB01060	amoxicillin	1.1e-05	HL60	0	0.01	0.1525
1266	DB09022	benfluorex	1.04e-05	HL60	0	0.03	0.18866
1267	DB13588	naftidrofuryl	8.4e-06	HL60	0	0.01	0.1525
1268	DB11186	pentoxyverine	7.6e-06	HL60	0	0.03	0.18866
1270		zoxazolamine	2.38e-05	HL60	0	0.05	0.210781
1271		N6-methyladenosine	1.42e-05	HL60	0	0.02	0.177068
1272	DB01239	chlorprothixene	1.14e-05	HL60	0	0	0
1273	DB00567	cefalexin	1.1e-05	HL60	0	0.07	0.218414
1274	DB01244	bepridil	1e-05	HL60	0	0.03	0.18866
1275	DB01393	bezafibrate	1.1e-05	HL60	0	0.02	0.177068
1276	DB04209	dequalinium chloride	7.6e-06	HL60	0	0.01	0.1525
1277	DB13670	oxantel	6.6e-06	HL60	0	0.01	0.1525
1278	DB00382	tacrine	1.58e-05	HL60	0	0.02	0.177068
1281	DB00514	dextromethorphan	1.08e-05	HL60	0	0.05	0.210781
1282	DB00490	buspirone	9.4e-06	HL60	0	0.02	0.177068
1284		trichostatin A	1e-07	HL60	0	0.04	0.203164
1285	DB01026	ketoconazole	7.6e-06	HL60	0	0.03	0.18866
1288	DB00875	flupentixol	7.8e-06	HL60	0	0	0
1290	DB00450	droperidol	1.06e-05	HL60	0	0.05	0.210781
1291	DB12319	benzbromarone	9.4e-06	HL60	0	0.04	0.203164
1292	DB13511	clebopride	8.2e-06	HL60	0	0.02	0.177068
1294	DB04703	hesperidin	6.6e-06	HL60	0	0.04	0.203164
1295	DB00624	testosterone	1.16e-05	HL60	0	0.02	0.177068
1296		androsterone	1.38e-05	HL60	0	0.03	0.18866
1297	DB13340	suloctidil	1.18e-05	HL60	0	0.01	0.1525
1298		coralyne	9.6e-06	HL60	0	0.05	0.210781
1299	DB00783	estradiol	1.46e-05	HL60	0	0.03	0.18866
1300		3-hydroxy-DL-kynurenine	1.78e-05	HL60	0	0.04	0.203164
1301	DB01184	domperidone	7.4e-06	HL60	0	0.05	0.210781
1302	DB01092	ouabain	5.4e-06	HL60	0	0.05	0.210781
1303	DB04365	arecoline	1.7e-05	HL60	0	0.05	0.210781
1304	DB07374	anisomycin	1.5e-05	HL60	0	0.06	0.213162
1306		trichostatin A	1e-07	HL60	0	0.03	0.18866
1308		fusaric acid	2.24e-05	HL60	0	0.01	0.1525
1309		lactobionic acid	1.12e-05	HL60	0	0.07	0.218414
1310	DB00671	cefixime	8.8e-06	HL60	0	0.02	0.177068
1311	DB01783	calcium pantothenate	8e-06	HL60	0	0.03	0.18866
1314	DB00395	carisoprodol	1.54e-05	HL60	0	0.04	0.203164
1315	DB00115	cyanocobalamin	3e-06	HL60	0	0.02	0.177068
1317		lumicolchicine	1e-05	HL60	0	0.02	0.177068
1319	DB01330	cefotetan	7e-06	HL60	0	0.04	0.203164
1320	DB14476	dl-alpha tocopherol	9.2e-06	HL60	0	0.05	0.210781
1322		7-aminocephalosporanic acid	1.46e-05	HL60	0	0.03	0.18866
1323	DB01140	cefadroxil	1.1e-05	HL60	0	0.02	0.177068
1324	DB06743	ginkgolide A	9.8e-06	HL60	0	0	0
1325		lysergol	1.58e-05	HL60	0	0.01	0.1525
1328		pepstatin	5.8e-06	HL60	0	0.04	0.203164
1329		N-acetyl-L-aspartic acid	2.28e-05	HL60	0	0.03	0.18866
1330		Chicago Sky Blue 6B	4e-06	HL60	0	0.02	0.177068
1331	DB00091	ciclosporin	3.4e-06	HL60	0	0.02	0.177068
1335	DB00835	brompheniramine	9.2e-06	HL60	0	0.01	0.1525
1336		SR-95639A	1e-05	HL60	0	0.02	0.177068
1338	DB13510	buflomedil	1.16e-05	HL60	0	0.02	0.177068
1340	DB00521	carteolol	1.22e-05	HL60	0	0.04	0.203164
1341	DB13092	meclocycline	5.8e-06	HL60	0	0.03	0.18866
1344	DB00915	amantadine	9.6e-06	HL60	0	0.02	0.177068
1345	DB12480	betulinic acid	8.8e-06	HL60	0	0.03	0.18866
1346	DB12029	chlorogenic acid	1.12e-05	HL60	0	0.03	0.18866
1363	DB00704	naltrexone	9.6e-06	HL60	0	0	0
1364	DB00358	mefloquine	9.6e-06	HL60	0	0.02	0.177068
1366	DB00675	tamoxifen	7e-06	HL60	0	0.01	0.1525
1367	DB00602	ivermectin	4.6e-06	HL60	0	0.03	0.18866
1368	DB01119	diazoxide	1.74e-05	HL60	0	0.02	0.177068
1372	DB08943	isoconazole	9.6e-06	HL60	0	0.02	0.177068
1373	DB01190	clindamycin	8.6e-06	HL60	0	0.22	0.275621
1374	DB00699	nicergoline	8.2e-06	HL60	0	0.02	0.177068
1375	DB00483	gallamine triethiodide	4.4e-06	HL60	0	0.01	0.1525
1376	DB01424	aminophenazone	1.72e-05	HL60	0	0.01	0.1525
1378	DB04821	nomifensine	1.12e-05	HL60	0	0.03	0.18866
1379	DB00844	nalbuphine	1.02e-05	HL60	0	0	0
1380	DB00421	spironolactone	9.6e-06	HL60	0	0	0
1383	DB00994	neomycin	4.2e-06	HL60	0	0.06	0.213162
1385	DB06148	mianserin	1.32e-05	HL60	0	0.01	0.1525
1387	DB13327	picotamide	1.02e-05	HL60	0	0.03	0.18866
1388	DB00670	pirenzepine	9.4e-06	HL60	0	0.02	0.177068
1389	DB00493	cefotaxime	8.4e-06	HL60	0	0.05	0.210781
1390	DB01622	thioproperazine	6.2e-06	HL60	0	0.01	0.1525
1391	DB11512	dihydrostreptomycin	2.8e-06	HL60	0	0.05	0.210781
1392	DB00960	pindolol	1.62e-05	HL60	0	0.05	0.210781
1393	DB08313	nocodazole	1.32e-05	HL60	0	0.04	0.203164
1394	DB01418	acenocoumarol	1.14e-05	HL60	0	0.01	0.1525
1395	DB00620	triamcinolone	1.02e-05	HL60	0	0.01	0.1525
1397	DB00759	tetracycline	8.4e-06	HL60	0	0.04	0.203164
1399	DB00951	isoniazid	2.92e-05	HL60	0	0.01	0.1525
1401	DB00302	tranexamic acid	2.54e-05	HL60	0	0.06	0.213162
1402		ampyrone	1.96e-05	HL60	0	0.21	0.269571
1403	DB00211	midodrine	1.38e-05	HL60	0	0.06	0.213162
1404	DB00863	ranitidine	1.14e-05	HL60	0	0.01	0.1525
1405	DB00554	piroxicam	1.2e-05	HL60	0	0.11	0.239643
1406	DB01059	norfloxacin	1.26e-05	HL60	0	0.02	0.177068
1407	DB00749	etodolac	1.4e-05	HL60	0	0	0
1409		etofylline	1.78e-05	HL60	0	0	0
1410	DB00848	levamisole	1.66e-05	HL60	0	0	0
1411	DB01041	thalidomide	1.54e-05	HL60	0	0.01	0.1525
1412	DB03604	tiratricol	6.4e-06	HL60	0	0.03	0.18866
1413	DB11156	pyrantel	1.12e-05	HL60	0	0.02	0.177068
1414		antimycin A	7.2e-06	HL60	0	0.02	0.177068
1415		scopolamine N-oxide	1e-05	HL60	0	0.07	0.218414
1416	DB00356	chlorzoxazone	2.36e-05	HL60	0	0.24	0.288189
1417	DB00752	tranylcypromine	2.36e-05	HL60	0	0.02	0.177068
1418	DB01626	pargyline	2.04e-05	HL60	0	0.02	0.177068
1419	DB13627	oxolinic acid	1.54e-05	HL60	0	0.03	0.18866
1420	DB02266	flufenamic acid	1.42e-05	HL60	0	0.03	0.18866
1421		trichostatin A	1e-07	HL60	0	0.02	0.177068
1422	DB08979	fenspiride	1.34e-05	HL60	0	0.06	0.213162
1423	DB06694	xylometazoline	1.42e-05	HL60	0	0.04	0.203164
1424	DB00424	hyoscyamine	1.38e-05	HL60	0	0.03	0.18866
1425	DB13026	ornidazole	1.82e-05	HL60	0	0.01	0.1525
1426	DB01616	alverine	8.4e-06	HL60	0	0.02	0.177068
1429	DB08972	flumequine	1.54e-05	HL60	0	0.01	0.1525
1430	DB01241	gemfibrozil	1.6e-05	HL60	0	0.01	0.1525
1431	DB00935	oxymetazoline	1.34e-05	HL60	0	0.02	0.177068
1432	DB00856	chlorphenesin	1.62e-05	HL60	0	0	0
1433	DB00593	ethosuximide	2.84e-05	HL60	0	0.03	0.18866
1435	DB00355	aztreonam	9.2e-06	HL60	0	0.01	0.1525
1436		hydrastinine	1.64e-05	HL60	0	0.05	0.210781
1437	DB09216	tolfenamic acid	1.52e-05	HL60	0	0.06	0.213162
1438		mefexamide	1.26e-05	HL60	0	0.03	0.18866
1439	DB13407	nifenazone	1.3e-05	HL60	0	0.08	0.223751
1440	DB13836	metampicillin	1.04e-05	HL60	0	0.05	0.210781
1441	DB06795	mafenide	1.8e-05	HL60	0	0.05	0.210781
1443	DB01147	cloxacillin	8.8e-06	HL60	0	0	0
1444	DB00806	pentoxifylline	1.44e-05	HL60	0	0.05	0.210781
1445	DB00939	meclofenamic acid	1.18e-05	HL60	0	0.04	0.203164
1463	DB06147	sulfathiazole	1.56e-05	MCF7	0	0.06	0.213162
1465	DB13179	troleandomycin	5e-06	MCF7	0	0.05	0.210781
1467	DB00391	sulpiride	1.18e-05	MCF7	0	0.07	0.218414
1470	DB00594	amiloride	1.32e-05	MCF7	0	0.07	0.218414
1473	DB00366	doxylamine	1.02e-05	MCF7	0	0.1	0.235977
1474	DB00205	pyrimethamine	1.6e-05	MCF7	0	0.16	0.252719
1475	DB00208	ticlopidine	1.34e-05	MCF7	0	0.1	0.235977
1476	DB00892	oxybuprocaine	1.16e-05	MCF7	0	0.07	0.218414
1477	DB01110	miconazole	9.6e-06	MCF7	0	0.09	0.231158
1478	DB00635	prednisone	1.12e-05	MCF7	0	0.08	0.223751
1479		amprolium	1.26e-05	MCF7	0	0.04	0.203164
1480	DB00249	idoxuridine	1.12e-05	MCF7	0	0.13	0.246964
1481	DB00330	ethambutol	1.44e-05	MCF7	0	0.06	0.213162
1482	DB08960	hexamethonium bromide	1e-05	MCF7	0	0.04	0.203164
1483	DB00804	dicycloverine	1.16e-05	MCF7	0	0.1	0.235977
1484	DB12532	oxetacaine	8.6e-06	MCF7	0	0.1	0.235977
1487	DB00999	hydrochlorothiazide	1.34e-05	MCF7	0	0.11	0.239643
1488	DB01197	captopril	1.72e-05	MCF7	0	0.08	0.223751
1490	DB00861	diflunisal	1.6e-05	MCF7	0	0.09	0.231158
1491	DB09088	amylocaine	1.48e-05	MCF7	0	0.06	0.213162
1492	DB01620	pheniramine	1.12e-05	MCF7	0	0.08	0.223751
1493	DB01193	acebutolol	1.08e-05	MCF7	0	0.11	0.239643
1497		4-hydroxyphenazone	1.96e-05	MCF7	0	0.07	0.218414
1498	DB06803	niclosamide	1.22e-05	MCF7	0	0.12	0.242304
1499	DB00281	lidocaine	1.48e-05	MCF7	0	0.11	0.239643
1500	DB00797	tolazoline	2.04e-05	MCF7	0	0.1	0.235977
1502	DB00662	trimethobenzamide	9.4e-06	MCF7	0	0.07	0.218414
1503	DB00916	metronidazole	2.34e-05	MCF7	0	0.09	0.231158
1504		khellin	1.54e-05	MCF7	0	0.1	0.235977
1505	DB00714	apomorphine	6.4e-06	MCF7	0	0.09	0.231158
1508	DB01067	glipizide	9e-06	MCF7	0	0.16	0.252719
1510	DB00199	erythromycin	5.4e-06	MCF7	0	0.12	0.242304
1511		cotinine	2.26e-05	MCF7	0	0.1	0.235977
1512	DB04832	zimeldine	9.8e-06	MCF7	0	0.09	0.231158
1513	DB00543	amoxapine	1.28e-05	MCF7	0	0.12	0.242304
1515		metanephrine	1.72e-05	MCF7	0	0.15	0.252066
1517	DB00975	dipyridamole	8e-06	MCF7	0	0.1	0.235977
1518	DB11442	oleandomycin	5e-06	MCF7	0	0.08	0.223751
1519	DB01010	edrophonium chloride	1.98e-05	MCF7	0	0.12	0.242304
1520		azacyclonol	1.5e-05	MCF7	0	0.17	0.254354
1522	DB00537	ciprofloxacin	1.08e-05	MCF7	0	0.13	0.246964
1523	DB11622	dehydrocholic acid	9.6e-06	MCF7	0	0.16	0.252719
1524	DB00557	hydroxyzine	9e-06	MCF7	0	0.14	0.249708
1525	DB00878	chlorhexidine	8e-06	MCF7	0	0.11	0.239643
1526	DB13456	midecamycin	5e-06	MCF7	0	0.08	0.223751
1528	DB00993	azathioprine	1.44e-05	MCF7	0	0.11	0.239643
1529	DB00927	famotidine	1.18e-05	MCF7	0	0.13	0.246964
1531	DB01094	hesperetin	1.32e-05	MCF7	0	0.16	0.252719
1532	DB00343	diltiazem	8.8e-06	MCF7	0	0.1	0.235977
1533	DB00836	loperamide	7.8e-06	MCF7	0	0.17	0.254354
1534	DB01321	josamycin	4.8e-06	MCF7	0	0.13	0.246964
1535		trichostatin A	1e-07	MCF7	0	0.17	0.254354
1537	DB12474	lynestrenol	1.4e-05	MCF7	0	0.15	0.252066
1541	DB09093	chlortetracycline	7.8e-06	MCF7	0	0.16	0.252719
1543	DB00787	aciclovir	1.78e-05	MCF7	0	0.12	0.242304
1549	DB00257	clotrimazole	1.16e-05	HL60	0	0.02	0.177068
1551	DB01062	oxybutynin	1.02e-05	HL60	0	0.06	0.213162
1552	DB09084	benzydamine	1.16e-05	HL60	0	0.04	0.203164
1553	DB00595	oxytetracycline	8e-06	HL60	0	0.05	0.210781
1555	DB00575	clonidine	1.5e-05	HL60	0	0	0
1556	DB08799	antazoline	1.32e-05	HL60	0	0.03	0.18866
1558	DB00568	cinnarizine	1.08e-05	HL60	0	0.02	0.177068
1559		spiperone	1.02e-05	HL60	0	0	0
1560	DB13790	fipexide	9.4e-06	HL60	0	0	0
1562	DB01100	pimozide	8.6e-06	HL60	0	0.01	0.1525
1564	DB01156	bupropion	1.44e-05	HL60	0	0.03	0.18866
1565	DB00903	etacrynic acid	1.32e-05	HL60	0	0.03	0.18866
1566	DB01242	clomipramine	1.14e-05	HL60	0	0.01	0.1525
1567	DB00959	methylprednisolone	1.06e-05	HL60	0	0.02	0.177068
1569	DB00834	mifepristone	9.4e-06	HL60	0	0.03	0.18866
1570	DB00613	amodiaquine	8.6e-06	HL60	0	0.01	0.1525
1571	DB00866	alprenolol	1.4e-05	HL60	0	0	0
1572	DB01058	praziquantel	1.28e-05	HL60	0	0.03	0.18866
1573	DB08980	fendiline	1.14e-05	HL60	0	0.01	0.1525
1574	DB01138	sulfinpyrazone	9.8e-06	HL60	0	0.02	0.177068
1575		diperodon	9.2e-06	HL60	0	0.02	0.177068
1577	DB00623	fluphenazine	7.8e-06	HL60	0	0.03	0.18866
1578	DB01082	streptomycin	2.8e-06	HL60	0	0.01	0.1525
1579		tremorine	1.5e-05	HL60	0	0	0
1581	DB00310	chlortalidone	1.18e-05	HL60	0	0	0
1582	DB01408	bambuterol	1e-05	HL60	0	0.01	0.1525
1583	DB00920	ketotifen	9.4e-06	HL60	0	0.02	0.177068
1585	DB00871	terbutaline	7.2e-06	HL60	0	0.01	0.1525
1587	DB01297	practolol	1.5e-05	HL60	0	0.03	0.18866
1590	DB00443	betamethasone	1.02e-05	HL60	0	0	0
1591	DB04840	debrisoquine	9e-06	HL60	0	0	0
1592	DB00195	betaxolol	1.16e-05	HL60	0	0.02	0.177068
1594	DB00672	chlorpropamide	1.44e-05	HL60	0	0.03	0.18866
1596	DB01151	desipramine	1.32e-05	HL60	0	0	0
1597	DB00467	enoxacin	1.24e-05	HL60	0	0.02	0.177068
1601		hemicholinium	7e-06	HL60	0	0.01	0.1525
1602	DB00397	phenylpropanolamine	2.14e-05	HL60	0	0.03	0.18866
1603	DB00263	sulfafurazole	1.5e-05	HL60	0	0.01	0.1525
1604	DB04017	clorgiline	1.3e-05	HL60	0	0.01	0.1525
1605	DB13792	clopamide	1.16e-05	HL60	0	0.18	0.256962
1606	DB13520	metergoline	1e-05	HL60	0	0.01	0.1525
1608	DB01599	probucol	7.8e-06	HL60	0	0	0
1610	DB00126	ascorbic acid	2.24e-05	HL60	0	0	0
1611		zaprinast	1.48e-05	HL60	0	0.02	0.177068
1612		trichostatin A	1e-07	HL60	0	0.01	0.1525
1613	DB01407	clenbuterol	1.28e-05	HL60	0	0.01	0.1525
1615	DB01194	brinzolamide	1.04e-05	HL60	0	0.02	0.177068
1616		metitepine	8.4e-06	HL60	0	0	0
1618	DB00479	amikacin	6.6e-06	HL60	0	0.02	0.177068
1619	DB00968	methyldopa	1.9e-05	HL60	0	0	0
1620	DB01178	chlormezanone	1.46e-05	HL60	0	0.01	0.1525
1621	DB00934	maprotiline	1.28e-05	HL60	0	0.01	0.1525
1624	DB00845	clofazimine	8.4e-06	HL60	0	0.01	0.1525
1625	DB03701	vanoxerine	7.6e-06	HL60	0	0.02	0.177068
1626	DB00773	etoposide	6.8e-06	HL60	0	0	0
1627	DB01329	cefoperazone	5.8e-06	HL60	0	0	0
1628	DB00502	haloperidol	1e-05	MCF7	0	0.04	0.203164
1629	DB00945	acetylsalicylic acid	0.0001	MCF7	0	0.03	0.18866
1633	DB00783	estradiol	1e-07	MCF7	0	0	0
1634	DB00313	valproic acid	0.001	MCF7	0	0	0
1635		alpha-estradiol	1e-08	MCF7	0	0.03	0.18866
1638	DB12442	alvespimycin	1e-07	MCF7	0	0.07	0.218414
1639	DB00313	valproic acid	0.0002	MCF7	0	0.04	0.203164
1640	DB00433	prochlorperazine	1e-05	MCF7	0	0.03	0.18866
1641	DB02656	LY-294002	1e-07	MCF7	0	0.01	0.1525
1643	DB05134	tanespimycin	1e-06	MCF7	0	0.05	0.210781
1647	DB00313	valproic acid	5e-05	MCF7	0	0	0
1648	DB00179	nordihydroguaiaretic acid	1e-06	MCF7	0	0.05	0.210781
1651	DB05134	tanespimycin	1e-06	MCF7	0	0.06	0.213162
1652	DB02656	LY-294002	1e-05	MCF7	0	0.03	0.18866
1653	DB02424	geldanamycin	1e-06	MCF7	0	0.02	0.177068
1654	DB00363	clozapine	1e-05	MCF7	0	0.03	0.18866
1655	DB00679	thioridazine	1e-05	MCF7	0	0.01	0.1525
1657	DB00197	troglitazone	1e-05	MCF7	0	0.05	0.210781
1658	DB00412	rosiglitazone	1e-05	MCF7	0	0.02	0.177068
1660	DB01645	genistein	1e-05	MCF7	0	0.06	0.213162
1662	DB00623	fluphenazine	1e-05	MCF7	0	0.02	0.177068
1665	DB00313	valproic acid	0.0005	MCF7	0	0.09	0.231158
1666	DB00783	estradiol	1e-08	MCF7	0	0.09	0.231158
1667	DB00877	sirolimus	1e-07	MCF7	0	0.06	0.213162
1669	DB00502	haloperidol	1e-05	MCF7	0	0.1	0.235977
1670	DB01667	8-azaguanine	2.62e-05	MCF7	0	0.02	0.177068
1671	DB13284	meticrane	1.46e-05	MCF7	0	0.04	0.203164
1672		trichostatin A	1e-07	MCF7	0	0.06	0.213162
1673	DB06729	sulfaphenazole	1.28e-05	MCF7	0	0.06	0.213162
1674	DB00721	procaine	1.46e-05	MCF7	0	0.03	0.18866
1675	DB11473	metrifonate	1.56e-05	MCF7	0	0.02	0.177068
1676		morantel	1.08e-05	MCF7	0	0.03	0.18866
1677		todralazine	1.48e-05	MCF7	0	0.03	0.18866
1678	DB11100	allantoin	2.52e-05	MCF7	0	0.04	0.203164
1679	DB00868	benzonatate	6.6e-06	MCF7	0	0.05	0.210781
1680	DB09357	dexpanthenol	1.94e-05	MCF7	0	0.03	0.18866
1681	DB08991	epirizole	1.7e-05	MCF7	0	0.02	0.177068
1682	DB09205	moxisylyte	1.26e-05	MCF7	0	0.01	0.1525
1683	DB00564	carbamazepine	1.7e-05	MCF7	0	0.04	0.203164
1684	DB11181	homatropine	1.12e-05	MCF7	0	0.07	0.218414
1685	DB00458	imipramine	1.26e-05	MCF7	0	0	0
1686	DB00819	acetazolamide	1.8e-05	MCF7	0	0.03	0.18866
1689	DB00651	diprophylline	1.58e-05	MCF7	0	0.02	0.177068
1690	DB00272	betazole	2.7e-05	MCF7	0	0.03	0.18866
1691	DB00508	triflupromazine	1.02e-05	MCF7	0	0.06	0.213162
1692	DB01115	nifedipine	1.16e-05	MCF7	0	0.07	0.218414
1693	DB00605	sulindac	1.12e-05	MCF7	0	0.02	0.177068
1694	DB00331	metformin	2.42e-05	MCF7	0	0.03	0.18866
1695	DB00634	sulfacetamide	1.58e-05	MCF7	0	0.03	0.18866
1696	DB09371	noretynodrel	1.34e-05	MCF7	0	0.06	0.213162
1697	DB00384	triamterene	1.58e-05	MCF7	0	0.04	0.203164
1698	DB08942	isoxicam	1.2e-05	MCF7	0	0.07	0.218414
1699	DB00784	mefenamic acid	1.66e-05	MCF7	0	0.05	0.210781
1700	DB00477	chlorpromazine	1.12e-05	MCF7	0	0.04	0.203164
1701	DB00321	amitriptyline	1.28e-05	MCF7	0	0.03	0.18866
1702	DB00732	atracurium besilate	3.2e-06	MCF7	0	0.05	0.210781
1703	DB13574	heptaminol	2.2e-05	MCF7	0	0.04	0.203164
1704	DB08621	thiamphenicol	1.12e-05	MCF7	0	0.07	0.218414
1705	DB00250	dapsone	1.62e-05	MCF7	0	0.05	0.210781
1706	DB00788	naproxen	1.74e-05	MCF7	0	0.04	0.203164
1707	DB00414	acetohexamide	1.24e-05	MCF7	0	0.11	0.239643
1708	DB01075	diphenhydramine	1.38e-05	MCF7	0	0.04	0.203164
1709		adiphenine	1.14e-05	MCF7	0	0.06	0.213162
1710	DB09210	piracetam	2.82e-05	HL60	0	0.12	0.242304
1713	DB09167	dosulepin	1.2e-05	HL60	0	0.02	0.177068
1715	DB02709	resveratrol	1.76e-05	HL60	0	0.02	0.177068
1717	DB08814	triflusal	1.62e-05	HL60	0	0.01	0.1525
1718	DB00498	phenindione	1.8e-05	HL60	0	0.02	0.177068
1719	DB00608	chloroquine	7.8e-06	HL60	0	0.01	0.1525
1720	DB01120	gliclazide	1.24e-05	HL60	0	0.03	0.18866
1721	DB00438	ceftazidime	6.2e-06	HL60	0	0.02	0.177068
1722	DB01182	propafenone	1.06e-05	HL60	0	0.1	0.235977
1724	DB01598	imipenem	1.34e-05	HL60	0	0.01	0.1525
1725	DB00933	mesoridazine	7.4e-06	HL60	0	0.03	0.18866
1727	DB09069	trimetazidine	1.18e-05	HL60	0	0.06	0.213162
1728		Prestwick-559	8.2e-06	HL60	0	0.03	0.18866
1729	DB06704	iobenguane	1.08e-05	HL60	0	0.05	0.210781
1731	DB01176	cyclizine	1.32e-05	HL60	0	0.04	0.203164
1732		trichostatin A	1e-07	HL60	0	0.04	0.203164
1734		Trolox C	1.6e-05	HL60	0	0.05	0.210781
1736	DB13063	parthenolide	1.62e-05	HL60	0	0.02	0.177068
1738	DB01199	tubocurarine chloride	5.2e-06	HL60	0	0.03	0.18866
1740		hydrastine hydrochloride	9.6e-06	HL60	0	0.1	0.235977
1741		laudanosine	1.12e-05	HL60	0	0.02	0.177068
1742		scoulerine	1.22e-05	HL60	0	0.08	0.223751
1743		10-methoxyharmalan	1.86e-05	HL60	0	0.08	0.223751
1745	DB13345	dihydroergocristine	5.6e-06	HL60	0	0.11	0.239643
1747		lobelanidine	1.06e-05	HL60	0	0.02	0.177068
1748		raubasine	1.02e-05	HL60	0	0.07	0.218414
1750		harmol	1.58e-05	HL60	0	0.04	0.203164
1751	DB04284	stachydrine	2.22e-05	HL60	0	0.03	0.18866
1752	DB00449	dipivefrine	1.04e-05	HL60	0	0.02	0.177068
1754		tomatidine	9.6e-06	HL60	0	0.04	0.203164
1755	DB01113	papaverine	1.06e-05	HL60	0	0.02	0.177068
1757		monocrotaline	1.22e-05	HL60	0	0.02	0.177068
1758		harmine	1.6e-05	HL60	0	0.02	0.177068
1759	DB00165	pyridoxine	1.94e-05	HL60	0	0.03	0.18866
1761		syrosingopine	6e-06	HL60	0	0.04	0.203164
1762	DB00851	dacarbazine	2.2e-05	HL60	0	0	0
1763	DB01392	yohimbine	1.02e-05	HL60	0	0.02	0.177068
1764		piperlongumine	1.26e-05	HL60	0	0.01	0.1525
1765		ellipticine	1.62e-05	HL60	0	0	0
1766	DB09028	cytisine	2.1e-05	HL60	0	0.03	0.18866
1767	DB00140	riboflavin	1.06e-05	HL60	0	0	0
1768	DB00572	atropine	5.8e-06	HL60	0	0.05	0.210781
1769	DB00332	ipratropium bromide	9.8e-06	HL60	0	0	0
1770	DB05137	lobeline	1.06e-05	HL60	0	0.09	0.231158
1771		calycanthine	1.16e-05	HL60	0	0.06	0.213162
1772		hydrocotarnine	1.32e-05	HL60	0	0	0
1773		1,4-chrysenequinone	1.54e-05	HL60	0	0.01	0.1525
1774		pseudopelletierine	2.1e-05	HL60	0	0.03	0.18866
1775	DB13718	hydroquinine	9.4e-06	HL60	0	0.04	0.203164
1776	DB00981	physostigmine	6.2e-06	HL60	0	0.1	0.235977
1777	DB01614	acepromazine	9e-06	HL60	0	0.02	0.177068
1778	DB04115	berberine	1.08e-05	HL60	0	0.01	0.1525
1779		convolamine	1.18e-05	HL60	0	0.03	0.18866
1780		cinchonidine	1.36e-05	HL60	0	0.02	0.177068
1782	DB11696	racecadotril	1.04e-05	HL60	0	0.01	0.1525
1783		epivincamine	1.12e-05	HL60	0	0	0
1784		aconitine	6.2e-06	HL60	0	0.06	0.213162
1785		trichostatin A	1e-07	HL60	0	0.03	0.18866
1786		(+)-chelidonine	1.08e-05	HL60	0	0.11	0.239643
1787		isocorydine	1.18e-05	HL60	0	0.1	0.235977
1788	DB13793	vinburnine	1.36e-05	HL60	0	0.01	0.1525
1789		quipazine	9e-06	HL60	0	0.05	0.210781
1790	DB00158	folic acid	9e-06	HL60	0	0.04	0.203164
1791	DB01667	8-azaguanine	2.62e-05	PC3	0	0	0
1792	DB13284	meticrane	1.46e-05	PC3	0	0	0
1793		trichostatin A	1e-07	PC3	0	0.01	0.1525
1794	DB06729	sulfaphenazole	1.28e-05	PC3	0	0	0
1796	DB00721	procaine	1.46e-05	PC3	0	0.02	0.177068
1797	DB11473	metrifonate	1.56e-05	PC3	0	0.04	0.203164
1798		morantel	1.08e-05	PC3	0	0.03	0.18866
1799		todralazine	1.48e-05	PC3	0	0.01	0.1525
1800	DB11100	allantoin	2.52e-05	PC3	0	0.08	0.223751
1801	DB00868	benzonatate	6.6e-06	PC3	0	0.04	0.203164
1802	DB09357	dexpanthenol	1.94e-05	PC3	0	0.07	0.218414
1803	DB08991	epirizole	1.7e-05	PC3	0	0.06	0.213162
1804	DB09205	moxisylyte	1.26e-05	PC3	0	0.09	0.231158
1805	DB00564	carbamazepine	1.7e-05	PC3	0	0.07	0.218414
1806	DB11181	homatropine	1.12e-05	PC3	0	0.07	0.218414
1807	DB00458	imipramine	1.26e-05	PC3	0	0.07	0.218414
1808	DB00819	acetazolamide	1.8e-05	PC3	0	0.06	0.213162
1809	DB00774	hydroflumethiazide	1.2e-05	PC3	0	0.06	0.213162
1810	DB00359	sulfadiazine	1.6e-05	PC3	0	0.08	0.223751
1811	DB00651	diprophylline	1.58e-05	PC3	0	0.07	0.218414
1812	DB00272	betazole	2.7e-05	PC3	0	0.07	0.218414
1813	DB00508	triflupromazine	1.02e-05	PC3	0	0.06	0.213162
1814	DB01115	nifedipine	1.16e-05	PC3	0	0.06	0.213162
1815	DB00605	sulindac	1.12e-05	PC3	0	0.04	0.203164
1816	DB00331	metformin	2.42e-05	PC3	0	0.1	0.235977
1818	DB09371	noretynodrel	1.34e-05	PC3	0	0.04	0.203164
1819	DB00384	triamterene	1.58e-05	PC3	0	0.08	0.223751
1820	DB08942	isoxicam	1.2e-05	PC3	0	0.09	0.231158
1821	DB00784	mefenamic acid	1.66e-05	PC3	0	0.07	0.218414
1823	DB00321	amitriptyline	1.28e-05	PC3	0	0.08	0.223751
1824	DB00732	atracurium besilate	3.2e-06	PC3	0	0.08	0.223751
1825	DB13574	heptaminol	2.2e-05	PC3	0	0.09	0.231158
1826	DB08621	thiamphenicol	1.12e-05	PC3	0	0.07	0.218414
1827	DB00250	dapsone	1.62e-05	PC3	0	0.12	0.242304
1828	DB00788	naproxen	1.74e-05	PC3	0	0	0
1829	DB00414	acetohexamide	1.24e-05	PC3	0	0	0
1830	DB01075	diphenhydramine	1.38e-05	PC3	0	0.11	0.239643
1831		adiphenine	1.14e-05	PC3	0	0.06	0.213162
1832	DB11522	isoflupredone	9.6e-06	PC3	0	0.03	0.18866
1833	DB01667	8-azaguanine	2.62e-05	HL60	0	0	0
1834	DB13284	meticrane	1.46e-05	HL60	0	0	0
1835		trichostatin A	1e-07	HL60	0	0	0
1836	DB06729	sulfaphenazole	1.28e-05	HL60	0	0	0
1837	DB00446	chloramphenicol	1.24e-05	HL60	0	0	0
1838	DB00721	procaine	1.46e-05	HL60	0	0.06	0.213162
1839	DB11473	metrifonate	1.56e-05	HL60	0	0	0
1840		morantel	1.08e-05	HL60	0	0	0
1841		todralazine	1.48e-05	HL60	0	0.01	0.1525
1842	DB11100	allantoin	2.52e-05	HL60	0	0	0
1843	DB00868	benzonatate	6.6e-06	HL60	0	0	0
1844	DB09357	dexpanthenol	1.94e-05	HL60	0	0.06	0.213162
1845	DB08991	epirizole	1.7e-05	HL60	0	0.01	0.1525
1846	DB09205	moxisylyte	1.26e-05	HL60	0	0.04	0.203164
1847	DB00564	carbamazepine	1.7e-05	HL60	0	0.05	0.210781
1848	DB11181	homatropine	1.12e-05	HL60	0	0.01	0.1525
1849	DB00458	imipramine	1.26e-05	HL60	0	0.01	0.1525
1850	DB00819	acetazolamide	1.8e-05	HL60	0	0.03	0.18866
1851	DB00774	hydroflumethiazide	1.2e-05	HL60	0	0.01	0.1525
1853	DB00651	diprophylline	1.58e-05	HL60	0	0.03	0.18866
1854	DB00272	betazole	2.7e-05	HL60	0	0.08	0.223751
1855	DB00508	triflupromazine	1.02e-05	HL60	0	0.02	0.177068
1857	DB00605	sulindac	1.12e-05	HL60	0	0.05	0.210781
1858	DB00331	metformin	2.42e-05	HL60	0	0.06	0.213162
1859	DB00634	sulfacetamide	1.58e-05	HL60	0	0	0
1861	DB00384	triamterene	1.58e-05	HL60	0	0.04	0.203164
1862	DB08942	isoxicam	1.2e-05	HL60	0	0.05	0.210781
1863	DB00784	mefenamic acid	1.66e-05	HL60	0	0.03	0.18866
1864	DB00477	chlorpromazine	1.12e-05	HL60	0	0.04	0.203164
1865	DB00321	amitriptyline	1.28e-05	HL60	0	0.05	0.210781
1866	DB13574	heptaminol	2.2e-05	HL60	0	0.06	0.213162
1867	DB08621	thiamphenicol	1.12e-05	HL60	0	0.01	0.1525
1868	DB00250	dapsone	1.62e-05	HL60	0	0.08	0.223751
1870	DB00414	acetohexamide	1.24e-05	HL60	0	0.05	0.210781
1873	DB11522	isoflupredone	9.6e-06	HL60	0	0.05	0.210781
1883	DB06147	sulfathiazole	1.56e-05	PC3	0	0.05	0.210781
1884	DB00501	cimetidine	1.58e-05	PC3	0	0.25	0.296174
[truncated: 4,101 more rows]

## Sheet: mDAAnet_GSE143758
Instance ID in the Cmap database	DrugBank ID	Drug Name	Drug Dose in Cmap database	Cell lines in Cmap database	Eneichment Score (ES)	P-value	adjusted p-value (FDR)
1277	DB13670	oxantel	6.6e-06	HL60	0.767844	0	0
1408	DB13415	pentetrazol	2.9e-05	HL60	0.733974	0	0
1424	DB00424	hyoscyamine	1.38e-05	HL60	0.713133	0	0
3453	DB06821	sulfametoxydiazine	1.42e-05	MCF7	0.708333	0	0
2948	DB01106	levocabastine	8.8e-06	HL60	0.701959	0	0
5214	DB00477	chlorpromazine	1e-06	MCF7	0.701696	0	0
3339		amiprilose	1.18e-05	MCF7	0.694692	0	0
1794	DB06729	sulfaphenazole	1.28e-05	PC3	0.687365	0	0
2841	DB00684	tobramycin	8.6e-06	MCF7	0.682717	0	0
7405	DB01148	flavoxate	9.4e-06	MCF7	0.680227	0	0
3250		carbarsone	1.54e-05	MCF7	0.674908	0	0
2917	DB01618	molindone	1.28e-05	HL60	0.667504	0	0
1829	DB00414	acetohexamide	1.24e-05	PC3	0.665865	0	0
4647	DB14084	butyl hydroxybenzoate	2.06e-05	PC3	0.664775	0	0
3248	DB01783	calcium pantothenate	8e-06	MCF7	0.664263	0	0
7250		morantel	1.08e-05	PC3	0.66266	0.01	0.05365
7210	DB00235	milrinone	1.9e-05	MCF7	0.661683	0	0
7446	DB00954	dirithromycin	4.8e-06	MCF7	0.657932	0	0
6290		zoxazolamine	2.38e-05	PC3	0.656323	0	0
4962	DB00339	pyrazinamide	3.24e-05	MCF7	0.654392	0	0
2836	DB12867	benperidol	1.04e-05	MCF7	0.651301	0	0
2104	DB02266	flufenamic acid	1.42e-05	PC3	0.650731	0	0
6455	DB12661	urapidil	9.4e-06	MCF7	0.649755	0	0
2810		vitexin	9.2e-06	MCF7	0.647902	0	0
6334	DB00868	benzonatate	6.6e-06	PC3	0.647198	0	0
1892	DB01235	levodopa	2.02e-05	PC3	0.644231	0	0
6243	DB00755	tretinoin	1.34e-05	MCF7	0.641526	0	0
2911	DB12092	naftopidil	8.6e-06	HL60	0.640742	0	0
7542		BCB000038	1e-05	MCF7	0.63688	0	0
5964	DB00947	fulvestrant	1e-06	MCF7	0.636249	0	0
2152		solanine	4.6e-06	HL60	0.636162	0	0
3455		drofenine	1.14e-05	MCF7	0.634009	0	0
2916	DB01006	letrozole	1.4e-05	HL60	0.632861	0	0
3244	DB04652	corticosterone	1.16e-05	MCF7	0.63141	0	0
7297	DB00680	moracizine	8.6e-06	PC3	0.630896	0	0
2956	DB00214	torasemide	1.14e-05	HL60	0.630646	0	0
2921	DB11385	cefalonium	8.8e-06	HL60	0.630505	0	0
2135		conessine	1.12e-05	HL60	0.630085	0	0
4951	DB00338	omeprazole	1.16e-05	MCF7	0.628726	0	0
2088	DB00863	ranitidine	1.14e-05	PC3	0.628395	0.01	0.05365
6785	DB00959	methylprednisolone	1.06e-05	MCF7	0.62742	0.01	0.05365
3416		eucatropine	1.22e-05	MCF7	0.625801	0	0
6495		atropine methonitrate	1.1e-05	MCF7	0.625348	0	0
3463	DB00827	cinoxacin	1.52e-05	MCF7	0.625194	0	0
7286	DB00465	ketorolac	1.06e-05	PC3	0.625058	0	0
7287	DB11473	metrifonate	1.56e-05	PC3	0.62442	0	0
5202	DB00947	fulvestrant	1e-06	MCF7	0.623792	0	0
3324	DB00279	liothyronine	6.2e-06	MCF7	0.623397	0	0
3504	DB14081	asiaticoside	4.2e-06	MCF7	0.623097	0	0
6242		skimmianine	1.54e-05	MCF7	0.621909	0	0
3261		lysergol	1.58e-05	MCF7	0.621491	0	0
4286	DB01009	ketoprofen	1.58e-05	PC3	0.620948	0	0
4607		dimethadione	3.1e-05	PC3	0.620866	0	0
3449	DB00259	sulfanilamide	2.32e-05	MCF7	0.620192	0	0
4093	DB02329	carbenoxolone	6.6e-06	PC3	0.620192	0	0
7291	DB00256	lymecycline	6.6e-06	PC3	0.620009	0	0
2806		harman	1.82e-05	MCF7	0.619937	0	0
2097	DB11156	pyrantel	1.12e-05	PC3	0.619227	0	0
4999	DB01393	bezafibrate	1.1e-05	MCF7	0.618358	0	0
4955	DB00395	carisoprodol	1.54e-05	MCF7	0.617788	0	0
5200	DB00502	haloperidol	1e-05	MCF7	0.616186	0	0
2901	DB00931	metacycline	8.4e-06	HL60	0.614734	0	0
2882	DB00795	sulfasalazine	1e-05	MCF7	0.614526	0.01	0.05365
2765		hydrocotarnine	1.32e-05	MCF7	0.61412	0	0
7180	DB00760	meropenem	1.04e-05	MCF7	0.61351	0.03	0.09844
2101	DB00752	tranylcypromine	2.36e-05	PC3	0.613027	0.03	0.09844
7329	DB01337	pancuronium bromide	5.4e-06	MCF7	0.612539	0	0
6297	DB00622	nicardipine	7.8e-06	PC3	0.612538	0	0
2161		picrotoxinin	1.36e-05	HL60	0.612096	0	0
6169		alpha-estradiol	1e-08	HL60	0.610484	0	0
3031	DB01301	rolitetracycline	7.6e-06	HL60	0.610348	0	0
4012	DB01620	pheniramine	1.12e-05	PC3	0.609914	0	0
4956	DB06698	betahistine	1.72e-05	MCF7	0.609814	0	0
2138		palmatine	1.04e-05	HL60	0.608388	0	0
6306	DB00126	ascorbic acid	2.24e-05	PC3	0.607766	0	0
3096	DB13399	terguride	8.8e-06	HL60	0.607547	0	0
2222	DB01424	aminophenazone	1.72e-05	MCF7	0.607196	0	0
7292	DB08991	epirizole	1.7e-05	PC3	0.606904	0	0
2868	DB00498	phenindione	1.8e-05	MCF7	0.606847	0	0
2099		scopolamine N-oxide	1e-05	PC3	0.606733	0.01	0.05365
2914	DB04626	apramycin	7.4e-06	HL60	0.606104	0	0
3032	DB01095	fluvastatin	9.2e-06	HL60	0.604999	0	0
2746		tomatidine	9.6e-06	MCF7	0.604911	0	0
2108	DB00424	hyoscyamine	1.38e-05	PC3	0.604335	0	0
2877		Prestwick-559	8.2e-06	MCF7	0.604101	0	0
2890		laudanosine	1.12e-05	MCF7	0.603868	0	0
7454		betulin	9e-06	MCF7	0.603829	0	0
2876	DB09069	trimetazidine	1.18e-05	MCF7	0.603785	0	0
2511	DB11336	kinetin	1.86e-05	HL60	0.603484	0	0
4952	DB00562	benzthiazide	9.2e-06	MCF7	0.603365	0	0
2844	DB00251	terconazole	7.6e-06	MCF7	0.603288	0	0
7362	DB13025	tiapride	1.1e-05	PC3	0.603277	0.01	0.05365
2925		Prestwick-967	2.58e-05	HL60	0.602488	0	0
6032	DB11748	benfotiamine	8.6e-06	MCF7	0.602311	0	0
4769	DB06147	sulfathiazole	1.56e-05	MCF7	0.601763	0	0
6908		BAS-012416453	3.8e-05	MCF7	0.601328	0	0
4556	DB00715	paroxetine	1e-06	PC3	0.601118	0	0
3030	DB01004	ganciclovir	1.56e-05	HL60	0.601087	0	0
6175	DB02656	LY-294002	1e-07	HL60	0.601076	0	0
2879	DB08989	etamivan	1.8e-05	MCF7	0.600342	0	0
2351		6-benzylaminopurine	1.78e-05	HL60	0.599934	0	0
3078	DB12661	urapidil	9.4e-06	HL60	0.599738	0	0
2788	DB11477	xylazine	1.82e-05	MCF7	0.598887	0	0
7306	DB00448	lansoprazole	1.08e-05	PC3	0.598571	0.02	0.0794788
2370		trichostatin A	1e-07	HL60	0.598558	0	0
3271	DB00835	brompheniramine	9.2e-06	MCF7	0.598524	0.01	0.05365
6935	DB02656	LY-294002	1e-07	MCF7	0.598013	0	0
6772	DB13351	piperidolate	1.12e-05	MCF7	0.597118	0	0
2483	DB00833	cefaclor	1.04e-05	HL60	0.596154	0	0
3545	DB04839	cyproterone	9.6e-06	MCF7	0.596154	0	0
4646	DB00737	meclozine	8.6e-06	PC3	0.596154	0	0
2870	DB01120	gliclazide	1.24e-05	MCF7	0.595811	0	0
2141	DB01833	canavanine	1.36e-05	HL60	0.593903	0.01	0.05365
2714		drofenine	1.14e-05	HL60	0.593866	0	0
2763	DB05137	lobeline	1.06e-05	MCF7	0.593362	0	0
2754	DB00851	dacarbazine	2.2e-05	MCF7	0.593226	0	0
2506	DB04574	estropipate	9.2e-06	HL60	0.59207	0	0
2263	DB00356	chlorzoxazone	2.36e-05	MCF7	0.590717	0	0
2512		anabasine	2.46e-05	HL60	0.590545	0	0
3561	DB09064	ciprofibrate	1.38e-05	MCF7	0.590545	0	0
7208	DB06707	corbadrine	2.18e-05	MCF7	0.590301	0	0
2388		telenzepine	9e-06	HL60	0.589605	0	0
4775	DB01783	calcium pantothenate	8e-06	MCF7	0.589093	0	0
6330	DB01222	budesonide	9.2e-06	PC3	0.588942	0	0
7449	DB00734	risperidone	9.8e-06	MCF7	0.588464	0	0
7258	DB00513	aminocaproic acid	3.04e-05	PC3	0.588164	0.01	0.05365
4605		naringin	6.6e-06	PC3	0.587846	0	0
2730	DB01139	cefapirin	9e-06	HL60	0.586877	0	0
6130	DB03322	dexpropranolol	1.36e-05	HL60	0.586761	0	0
4526		trichostatin A	1e-07	PC3	0.586484	0	0
2940		methyldopate	1.46e-05	HL60	0.586409	0	0
5582	DB00313	valproic acid	5e-05	MCF7	0.586263	0	0
4538	DB00780	phenelzine	1.7e-05	PC3	0.586186	0	0
2724	DB01427	amrinone	2.14e-05	HL60	0.586011	0	0
6484	DB01586	ursodeoxycholic acid	1.02e-05	MCF7	0.585818	0	0
2556		eucatropine	1.22e-05	HL60	0.584936	0	0
3342	DB00726	trimipramine	9.8e-06	MCF7	0.584878	0	0
6500	DB08849	nipecotic acid	3.1e-05	MCF7	0.584604	0	0
6273		tremorine	1.5e-05	MCF7	0.584232	0	0
7137	DB00959	methylprednisolone	1.06e-05	PC3	0.584135	0	0
2468	DB00341	cetirizine	8.6e-06	HL60	0.583296	0.01	0.05365
3445	DB00194	vidarabine	1.5e-05	MCF7	0.582893	0.02	0.0794788
6501	DB00513	aminocaproic acid	3.04e-05	MCF7	0.58272	0	0
6462		N-acetyl-L-leucine	2.3e-05	MCF7	0.582498	0	0
3085		N-acetyl-L-leucine	2.3e-05	HL60	0.582238	0	0
2840	DB00730	tiabendazole	1.98e-05	MCF7	0.581731	0	0
6305	DB00585	nizatidine	1.2e-05	PC3	0.581512	0.01	0.05365
3523		S-propranolol	1.36e-05	MCF7	0.580401	0	0
7293	DB00752	tranylcypromine	2.36e-05	PC3	0.580288	0	0
2347	DB00809	tropicamide	1.4e-05	HL60	0.57937	0	0
2812		hydroxyachillin	1.42e-05	MCF7	0.579327	0	0
3138	DB09009	articaine	1.24e-05	HL60	0.578913	0	0
4815	DB00341	cetirizine	8.6e-06	MCF7	0.578669	0.01	0.05365
6172	DB12442	alvespimycin	1e-07	HL60	0.577313	0	0
2811	DB00378	dydrogesterone	1.28e-05	MCF7	0.576629	0.01	0.05365
6133	DB00460	verteporfin	2.8e-06	HL60	0.576214	0	0
3076	DB00345	aminohippuric acid	2.06e-05	HL60	0.575918	0.01	0.05365
3184	DB06691	mepyramine	1e-05	MCF7	0.575773	0	0
2761	DB00572	atropine	5.8e-06	MCF7	0.575456	0	0
3799		parbendazole	1.62e-05	PC3	0.575234	0	0
3544		meprylcaine	1.48e-05	MCF7	0.575089	0.01	0.05365
5593	DB00412	rosiglitazone	1e-05	MCF7	0.574227	0	0
3101	DB11221	dioxybenzone	1.64e-05	HL60	0.574174	0	0
3067	DB13443	(-)-atenolol	1.5e-05	HL60	0.572946	0	0
3522	DB14075	imidurea	1.04e-05	MCF7	0.572842	0	0
2568	DB00911	tinidazole	1.62e-05	HL60	0.572488	0	0
4772	DB00674	galantamine	1.08e-05	MCF7	0.572406	0.01	0.05365
4553	DB12704	spiradoline	1e-06	PC3	0.572115	0	0
2872	DB12401	bromperidol	9.6e-06	MCF7	0.571865	0	0
4610	DB00997	doxorubicin	6.8e-06	PC3	0.571357	0	0
3260	DB06743	ginkgolide A	9.8e-06	MCF7	0.570932	0.01	0.05365
6444	DB13443	(-)-atenolol	1.5e-05	MCF7	0.570876	0	0
7282	DB13284	meticrane	1.46e-05	PC3	0.570627	0	0
4825		amprolium	1.26e-05	MCF7	0.56936	0.01	0.05365
4816		salsolinol	1.54e-05	MCF7	0.569256	0	0
2398	DB13785	dropropizine	1.7e-05	HL60	0.56891	0	0
6246	DB01232	saquinavir	5.2e-06	MCF7	0.56891	0	0
4533	DB11064	homosalate	1.52e-05	PC3	0.568599	0.01	0.05365
2799		gramine	2.3e-05	MCF7	0.568494	0.01	0.05365
2902		pronetalol	1.5e-05	HL60	0.56797	0.01	0.05365
4957		palmatine	1.04e-05	MCF7	0.567865	0.01	0.05365
6492	DB00807	proxymetacaine	1.2e-05	MCF7	0.567668	0.01	0.05365
1181	DB00313	valproic acid	0.0005	HL60	0.567308	0.01	0.05365
6262	DB01061	azlocillin	8.2e-06	MCF7	0.567296	0.01	0.05365
2918	DB00489	sotalol	1.3e-05	HL60	0.567015	0.01	0.05365
6162	DB00244	mesalazine	2.62e-05	HL60	0.566569	0	0
4991	DB01067	glipizide	9e-06	MCF7	0.566506	0	0
5766		skimmianine	1.54e-05	PC3	0.566116	0	0
2984	DB00279	liothyronine	6.2e-06	HL60	0.565282	0	0
3517	DB00214	torasemide	1.14e-05	MCF7	0.563321	0.01	0.05365
2362	DB00692	phentolamine	1.26e-05	HL60	0.563301	0.01	0.05365
3503	DB12017	ozagrel	1.52e-05	MCF7	0.562399	0.01	0.05365
2751	DB00165	pyridoxine	1.94e-05	MCF7	0.561977	0.04	0.113488
6146	DB01607	ticarcillin	9.4e-06	HL60	0.561914	0.01	0.05365
2235	DB00493	cefotaxime	8.4e-06	MCF7	0.561699	0	0
4354		Prestwick-1080	1.5e-05	MCF7	0.561452	0	0
1796	DB00721	procaine	1.46e-05	PC3	0.560983	0	0
5601	DB00783	estradiol	1e-08	MCF7	0.560733	0	0
4950		lactobionic acid	1.12e-05	MCF7	0.560244	0	0
3043	DB00627	nicotinic acid	3.24e-05	HL60	0.559013	0	0
2907	DB08984	etofenamate	1.08e-05	HL60	0.558999	0.02	0.0794788
4266	DB00253	medrysone	1.16e-05	PC3	0.558941	0	0
3035	DB06820	sulconazole	8.6e-06	HL60	0.558686	0	0
5569	DB00313	valproic acid	0.001	MCF7	0.558459	0	0
5390		zoxazolamine	2.38e-05	MCF7	0.557393	0	0
4197	DB01833	canavanine	1.36e-05	PC3	0.55721	0	0
6927	DB00877	sirolimus	1e-07	MCF7	0.556292	0	0
2381	DB04841	flunarizine	8.4e-06	HL60	0.556223	0	0
4494	DB01614	acepromazine	9e-06	PC3	0.55609	0	0
2262		scopolamine N-oxide	1e-05	MCF7	0.555959	0	0
5092	DB00896	rimexolone	1.08e-05	PC3	0.555949	0	0
4239		fosfosal	1.84e-05	PC3	0.55555	0	0
5576	DB02656	LY-294002	1e-07	MCF7	0.555305	0	0
2718		mevalolactone	3.08e-05	HL60	0.555071	0	0
2434	DB01118	amiodarone	5.8e-06	HL60	0.555051	0	0
2670		alpha-estradiol	1e-08	HL60	0.553729	0	0
2807	DB13683	quinisocaine	1.3e-05	MCF7	0.553686	0.01	0.05365
4284	DB00750	prilocaine	1.56e-05	PC3	0.553686	0	0
6792	DB00178	ramipril	9.6e-06	MCF7	0.553576	0.01	0.05365
5860	DB13642	pridinol	1.02e-05	PC3	0.553101	0	0
2509	DB00324	fluorometholone	1.06e-05	HL60	0.552758	0	0
2867	DB08814	triflusal	1.62e-05	MCF7	0.552602	0	0
3038	DB00392	profenamine	1.14e-05	HL60	0.552362	0	0
6126	DB00826	natamycin	6e-06	HL60	0.552253	0	0
2826	DB01037	selegiline	1.78e-05	MCF7	0.552083	0	0
6186	DB02656	LY-294002	1e-05	HL60	0.551597	0	0
3818	DB12704	spiradoline	1e-06	PC3	0.55152	0	0
3110	DB00465	ketorolac	1.06e-05	HL60	0.551063	0	0
2712	DB06821	sulfametoxydiazine	1.42e-05	HL60	0.550875	0	0
2371	DB00722	lisinopril	9e-06	HL60	0.550698	0	0
4276		Prestwick-674	1.44e-05	PC3	0.550481	0.01	0.05365
2802		trimethylcolchicinic acid	1.16e-05	MCF7	0.550188	0	0
3797	DB11064	homosalate	1.52e-05	PC3	0.550168	0	0
2873	DB01598	imipenem	1.34e-05	MCF7	0.549919	0.01	0.05365
2809	DB00222	glimepiride	8.2e-06	MCF7	0.549437	0.03	0.09844
4267	DB00618	demeclocycline	8e-06	PC3	0.549384	0	0
4777		conessine	1.12e-05	MCF7	0.549204	0	0
999		monorden	1e-07	MCF7	0.548878	0	0
3525	DB00657	mecamylamine	1.96e-05	MCF7	0.548878	0	0
6450	DB01099	flucytosine	3.1e-05	MCF7	0.548339	0	0
3079		lorglumide	8.4e-06	HL60	0.548077	0	0
4277		heliotrine	1.28e-05	PC3	0.547791	0	0
6052	DB00754	ethotoin	1.96e-05	MCF7	0.547657	0	0
3509	DB01106	levocabastine	8.8e-06	MCF7	0.547368	0	0
2883		Trolox C	1.6e-05	MCF7	0.546915	0	0
2758		ellipticine	1.62e-05	MCF7	0.546664	0	0
3234	DB00968	methyldopa	1.9e-05	MCF7	0.546302	0	0
3042	DB00411	carbachol	2.18e-05	HL60	0.546032	0	0
2720	DB01625	isopropamide iodide	8.4e-06	HL60	0.545769	0	0
2547	DB00367	levonorgestrel	1.28e-05	HL60	0.545716	0	0
6041		Prestwick-665	1.16e-05	MCF7	0.545426	0	0
6614	DB04626	apramycin	7.4e-06	PC3	0.545359	0	0
3989	DB08984	etofenamate	1.08e-05	PC3	0.545214	0	0
3272		SR-95639A	1e-05	MCF7	0.545189	0.01	0.05365
4074	DB00208	ticlopidine	1.34e-05	PC3	0.545182	0	0
2874	DB00933	mesoridazine	7.4e-06	MCF7	0.544647	0.01	0.05365
6771		monocrotaline	1.22e-05	MCF7	0.544503	0.01	0.05365
2517	DB00456	cefalotin	9.6e-06	HL60	0.544196	0.01	0.05365
3338		tetroquinone	2.1e-05	MCF7	0.544035	0	0
3098	DB00457	prazosin	9.6e-06	HL60	0.543755	0.02	0.0794788
2105		trichostatin A	1e-07	PC3	0.543711	0.01	0.05365
7163	DB13232	suxibuzone	9.2e-06	MCF7	0.543269	0	0
4002	DB06743	ginkgolide A	9.8e-06	PC3	0.543254	0	0
4990	DB04819	methapyrilene	1.34e-05	MCF7	0.542318	0.01	0.05365
4963		protoveratrine A	5e-06	MCF7	0.542286	0.01	0.05365
1793		trichostatin A	1e-07	PC3	0.541993	0.01	0.05365
3033	DB13248	phthalylsulfathiazole	1e-05	HL60	0.541902	0	0
6030	DB04817	metamizole sodium	1.2e-05	MCF7	0.54169	0	0
4291		PNU-0230031	1e-06	PC3	0.541667	0	0
4572	DB00115	cyanocobalamin	3e-06	PC3	0.541582	0	0
2373	DB01148	flavoxate	9.4e-06	HL60	0.541028	0.04	0.113488
3747	DB00180	flunisolide	9.2e-06	PC3	0.540865	0	0
4649	DB11186	pentoxyverine	7.6e-06	PC3	0.540591	0	0
5984	DB13284	meticrane	1.46e-05	MCF7	0.540057	0	0
4810		salsolidin	1.64e-05	MCF7	0.540015	0	0
6830		clofilium tosylate	7.8e-06	MCF7	0.539263	0	0
3512	DB12478	piribedil	1.2e-05	MCF7	0.539015	0.01	0.05365
2924	DB01096	oxamniquine	1.44e-05	HL60	0.538847	0	0
6140	DB04573	estriol	1.38e-05	HL60	0.537919	0	0
4616	DB09020	bisacodyl	1.1e-05	PC3	0.537753	0	0
2305	DB01090	pentolonium	7.4e-06	MCF7	0.537726	0	0
4280	DB00809	tropicamide	1.4e-05	PC3	0.53766	0	0
2705	DB03615	ribostamycin	7.2e-06	HL60	0.537302	0	0
4355	DB11064	homosalate	1.52e-05	MCF7	0.537105	0.01	0.05365
5007	DB00553	methoxsalen	1.86e-05	MCF7	0.537084	0	0
2866	DB01222	budesonide	9.2e-06	MCF7	0.536082	0	0
6924	DB00945	acetylsalicylic acid	0.0001	MCF7	0.536058	0.02	0.0794788
4653	DB13248	phthalylsulfathiazole	1e-05	PC3	0.536008	0	0
3766	DB00266	dicoumarol	1.18e-05	PC3	0.535796	0	0
2433	DB01023	felodipine	1.04e-05	HL60	0.535719	0.03	0.09844
2804		boldine	1.22e-05	MCF7	0.535614	0.01	0.05365
4567	DB00671	cefixime	8.8e-06	PC3	0.535537	0	0
6036	DB01581	sulfamerazine	1.52e-05	MCF7	0.535453	0	0
3474	DB00703	methazolamide	1.7e-05	MCF7	0.535269	0.02	0.0794788
4358	DB01000	ciclacillin	1.18e-05	MCF7	0.535265	0	0
4395	DB00115	cyanocobalamin	3e-06	MCF7	0.535101	0	0
3380	DB00411	carbachol	2.18e-05	MCF7	0.53467	0	0
3105	DB01586	ursodeoxycholic acid	1.02e-05	HL60	0.534022	0.01	0.05365
2271	DB00424	hyoscyamine	1.38e-05	MCF7	0.534001	0.01	0.05365
2265	DB01626	pargyline	2.04e-05	MCF7	0.533773	0	0
6139	DB00260	cycloserine	3.92e-05	HL60	0.533654	0.01	0.05365
6795	DB12554	mebeverine	8.6e-06	MCF7	0.53363	0.01	0.05365
418	DB00502	haloperidol	1e-05	MCF7	0.533339	0.01	0.05365
6277		propidium iodide	6e-06	MCF7	0.532948	0.01	0.05365
2376	DB00427	triprolidine	1.28e-05	HL60	0.532736	0.01	0.05365
2560	DB01582	sulfadimidine	1.34e-05	HL60	0.532413	0	0
6457	DB09552	tonzonium bromide	6.8e-06	MCF7	0.532342	0	0
6461	DB04815	clioquinol	1.3e-05	MCF7	0.532254	0	0
2312	DB00914	phenformin	1.66e-05	MCF7	0.532227	0	0
6496	DB09186	nisoxetine	1.3e-05	MCF7	0.532165	0.01	0.05365
6164	DB00945	acetylsalicylic acid	0.0001	HL60	0.532081	0	0
4268	DB13758	meclofenoxate	1.36e-05	PC3	0.531873	0	0
4292		0179445-0000	1e-06	PC3	0.531854	0	0
2523		trichostatin A	1e-07	HL60	0.531829	0.01	0.05365
3461	DB01625	isopropamide iodide	8.4e-06	MCF7	0.531709	0	0
4285	DB01233	metoclopramide	1.18e-05	PC3	0.531656	0	0
3068		meglumine	2.04e-05	HL60	0.531569	0	0
6284	DB00316	paracetamol	2.64e-05	PC3	0.531501	0.01	0.05365
5574	DB00313	valproic acid	0.0002	MCF7	0.531147	0	0
6134		ronidazole	2e-05	HL60	0.531117	0	0
6452	DB06439	tyloxapol	4e-06	MCF7	0.53077	0.01	0.05365
6658	DB15584	luteolin	1.4e-05	PC3	0.530675	0	0
2719		pipenzolate bromide	9.2e-06	HL60	0.529819	0	0
3041	DB15584	luteolin	1.4e-05	HL60	0.52894	0	0
4278	DB09018	bromopride	1.16e-05	PC3	0.528874	0	0
3060	DB03671	digoxigenin	1.02e-05	HL60	0.528128	0.01	0.05365
7231	DB11376	azaperone	1.22e-05	MCF7	0.527665	0	0
2505		ricinine	2.44e-05	HL60	0.527558	0	0
3040		Prestwick-860	3.5e-05	HL60	0.527526	0	0
5220	DB00179	nordihydroguaiaretic acid	1e-06	MCF7	0.527184	0.01	0.05365
4352	DB00991	oxaprozin	1.36e-05	MCF7	0.526966	0	0
5941		H-7	0.0001	PC3	0.526908	0	0
2301		clemizole	1.1e-05	MCF7	0.526716	0	0
4479	DB04828	zomepirac	1.28e-05	PC3	0.526488	0	0
7067		GW-8510	1e-05	PC3	0.526447	0	0
576	DB01051	novobiocin	0.0001	MCF7	0.525712	0	0
2399	DB04552	niflumic acid	1.42e-05	HL60	0.525649	0	0
2425		naringin	6.6e-06	HL60	0.525341	0	0
3026	DB09134	ioversol	5e-06	HL60	0.525243	0	0
3052	DB13155	esculin	1.18e-05	HL60	0.524916	0	0
6291	DB00672	chlorpropamide	1.44e-05	PC3	0.524881	0.02	0.0794788
6973	DB12442	alvespimycin	1e-07	MCF7	0.52484	0	0
2930	DB08985	etilefrine	1.84e-05	HL60	0.524798	0.02	0.0794788
2175	DB04817	metamizole sodium	1.2e-05	HL60	0.524548	0.01	0.05365
521	DB05134	tanespimycin	1e-06	ssMCF7	0.524332	0.01	0.05365
3793	DB01325	quinethazone	1.38e-05	PC3	0.523563	0	0
2521		fluorocurarine	1.16e-05	HL60	0.523411	0.01	0.05365
5993	DB13449	proxyphylline	1.68e-05	MCF7	0.523237	0.03	0.09844
3829	DB04843	mepenzolate bromide	9.6e-06	MCF7	0.522961	0.01	0.05365
6165	DB00947	fulvestrant	1e-06	HL60	0.522436	0	0
2636	DB00514	dextromethorphan	1.08e-05	MCF7	0.522254	0	0
6619		tracazolate	1.18e-05	PC3	0.521363	0	0
6063		betonicine	2.52e-05	MCF7	0.521248	0.01	0.05365
3378		Prestwick-860	3.5e-05	MCF7	0.520833	0.02	0.0794788
2307	DB00440	trimethoprim	1.38e-05	MCF7	0.520376	0.01	0.05365
5485	DB00711	diethylcarbamazine	1.02e-05	MCF7	0.51978	0.01	0.05365
3796		Prestwick-1080	1.5e-05	PC3	0.519437	0	0
6478	DB11221	dioxybenzone	1.64e-05	MCF7	0.519366	0	0
1484	DB12532	oxetacaine	8.6e-06	MCF7	0.519231	0.02	0.0794788
5732	DB06821	sulfametoxydiazine	1.42e-05	PC3	0.519231	0	0
2436	DB00169	colecalciferol	1.04e-05	HL60	0.519219	0.03	0.09844
6145	DB01580	oxprenolol	1.32e-05	HL60	0.519104	0.02	0.0794788
3806		2,6-dimethylpiperidine	2.68e-05	PC3	0.518879	0.02	0.0794788
4785	DB00249	idoxuridine	1.12e-05	MCF7	0.518381	0.01	0.05365
3945		helveticoside	7.4e-06	MCF7	0.518264	0	0
5753	DB01138	sulfinpyrazone	9.8e-06	PC3	0.51825	0.03	0.09844
6173	DB00313	valproic acid	0.0002	HL60	0.518203	0	0
6038	DB09401	isosorbide	1.7e-05	MCF7	0.517994	0	0
4559		PHA-00745360	1e-05	PC3	0.517904	0.02	0.0794788
2284		mefexamide	1.26e-05	MCF7	0.517628	0.01	0.05365
3615		heliotrine	1.28e-05	MCF7	0.517628	0.01	0.05365
5996	DB00752	tranylcypromine	2.36e-05	MCF7	0.517628	0	0
3099		desoxycortone	1.22e-05	HL60	0.517517	0.04	0.113488
6783	DB09015	canrenoic acid	1e-05	MCF7	0.517186	0.01	0.05365
6873		H-89	5e-07	PC3	0.516974	0.02	0.0794788
2382	DB13346	bufexamac	1.8e-05	HL60	0.516948	0.02	0.0794788
4525	DB04820	nialamide	1.34e-05	PC3	0.516839	0	0
6497		Prestwick-920	1.36e-05	MCF7	0.516165	0.03	0.09844
5585	DB05134	tanespimycin	1e-06	MCF7	0.516133	0.02	0.0794788
3847	DB01582	sulfadimidine	1.34e-05	MCF7	0.516026	0.03	0.09844
3135	DB11371	alfaxalone	1.2e-05	HL60	0.51551	0	0
2871	DB01182	propafenone	1.06e-05	MCF7	0.515224	0.01	0.05365
2445	DB00485	dicloxacillin	8.2e-06	HL60	0.514856	0.01	0.05365
3249	DB00451	levothyroxine sodium	5.2e-06	MCF7	0.514043	0.03	0.09844
6661	DB00553	methoxsalen	1.86e-05	PC3	0.513622	0	0
3075	DB12328	cantharidin	2.04e-05	HL60	0.513418	0.01	0.05365
2923	DB09242	moxonidine	1.66e-05	HL60	0.513397	0.03	0.09844
5464		adrenosterone	1.34e-05	MCF7	0.51327	0.01	0.05365
3326	DB00277	theophylline	2.02e-05	MCF7	0.513025	0.01	0.05365
6027		pempidine	1.3e-05	MCF7	0.512531	0	0
7532		CP-319743	1e-05	MCF7	0.512338	0	0
5989	DB11473	metrifonate	1.56e-05	MCF7	0.512273	0.02	0.0794788
3757	DB01047	fluocinonide	8e-06	PC3	0.510685	0	0
3363	DB00590	doxazosin	7.4e-06	MCF7	0.510234	0.03	0.09844
4996	DB00543	amoxapine	1.28e-05	MCF7	0.510021	0.04	0.113488
3131		scopoletin	2.08e-05	HL60	0.509615	0.01	0.05365
5765	DB00704	naltrexone	9.6e-06	PC3	0.509549	0	0
4611	DB06439	tyloxapol	4e-06	PC3	0.509418	0.02	0.0794788
6337	DB01142	doxepin	1.26e-05	PC3	0.508984	0.04	0.113488
2552	DB11518	flunixin	8.2e-06	HL60	0.508172	0	0
4359	DB01173	orphenadrine	1.3e-05	MCF7	0.50811	0	0
3074	DB06439	tyloxapol	4e-06	HL60	0.508064	0	0
2889		hydrastine hydrochloride	9.6e-06	MCF7	0.508013	0	0
2225	DB00844	nalbuphine	1.02e-05	MCF7	0.507993	0.01	0.05365
6181	DB00313	valproic acid	5e-05	HL60	0.507992	0.01	0.05365
5249	DB13248	phthalylsulfathiazole	1e-05	MCF7	0.507965	0.01	0.05365
2722	DB00827	cinoxacin	1.52e-05	HL60	0.507944	0	0
6304	DB01054	nitrendipine	1.1e-05	PC3	0.507869	0.04	0.113488
4608	DB00195	betaxolol	1.16e-05	PC3	0.507768	0	0
5610	DB11186	pentoxyverine	7.6e-06	MCF7	0.507233	0	0
5258	DB04815	clioquinol	1.3e-05	MCF7	0.506928	0.01	0.05365
4715		0173570-0000	1e-06	MCF7	0.506899	0.02	0.0794788
4168		sanguinarine	1.2e-05	MCF7	0.506601	0	0
5787	DB01112	cefuroxime	9e-06	PC3	0.506508	0	0
1209	DB00313	valproic acid	0.001	PC3	0.506479	0.04	0.113488
5565	DB00947	fulvestrant	1e-06	MCF7	0.50641	0.02	0.0794788
5672	DB06439	tyloxapol	4e-06	MCF7	0.50632	0	0
2229	DB00994	neomycin	4.2e-06	MCF7	0.506016	0.01	0.05365
2048	DB00358	mefloquine	9.6e-06	PC3	0.505762	0.02	0.0794788
825		rottlerin	1e-05	MCF7	0.505456	0.07	0.147394
6168	DB00313	valproic acid	0.001	HL60	0.505163	0	0
6894		SB-203580	1e-06	PC3	0.505125	0	0
487		pirinixic acid	0.0001	MCF7	0.505015	0	0
2387		glafenine	9.8e-06	HL60	0.50489	0.05	0.125308
2397	DB00584	enalapril	8.2e-06	HL60	0.504808	0.02	0.0794788
3289	DB00121	biotin	1.64e-05	MCF7	0.504808	0.03	0.09844
6340		trichostatin A	1e-07	PC3	0.503698	0.05	0.125308
4337	DB13431	proglumide	1.2e-05	PC3	0.503449	0.02	0.0794788
4612	DB06774	capsaicin	1.3e-05	PC3	0.50324	0.01	0.05365
2510	DB12736	etanidazole	1.86e-05	HL60	0.503042	0.03	0.09844
6806	DB04839	cyproterone	9.6e-06	MCF7	0.50287	0.05	0.125308
6647	DB00655	estrone	1.48e-05	PC3	0.502644	0.01	0.05365
4964		tracazolate	1.18e-05	MCF7	0.502404	0.01	0.05365
2267	DB02266	flufenamic acid	1.42e-05	MCF7	0.502368	0	0
4446	DB00313	valproic acid	5e-05	PC3	0.502248	0.01	0.05365
2824		salsolidin	1.64e-05	MCF7	0.501783	0.04	0.113488
507		SC-58125	1e-05	SKMEL5	0.501765	0	0
4269	DB00367	levonorgestrel	1.28e-05	PC3	0.501329	0	0
7288	DB01041	thalidomide	1.54e-05	PC3	0.501258	0.01	0.05365
2725	DB00748	carbinoxamine	9.8e-06	HL60	0.501119	0.01	0.05365
3794	DB00991	oxaprozin	1.36e-05	PC3	0.500801	0.01	0.05365
3804	DB01124	tolbutamide	1.48e-05	PC3	0.500801	0	0
4204		epitiostanol	1.3e-05	PC3	0.500216	0	0
882		ionomycin	2e-06	MCF7	0.499945	0.02	0.0794788
5575	DB00433	prochlorperazine	1e-05	MCF7	0.499804	0.01	0.05365
6616	DB14476	dl-alpha tocopherol	9.2e-06	PC3	0.499691	0.02	0.0794788
4247	DB12582	piperine	1.4e-05	PC3	0.499199	0.01	0.05365
5061		denatonium benzoate	9e-06	PC3	0.499199	0.01	0.05365
5564	DB00945	acetylsalicylic acid	0.0001	MCF7	0.499114	0.01	0.05365
5222	DB05134	tanespimycin	1e-06	MCF7	0.499059	0.05	0.125308
2677	DB00477	chlorpromazine	1e-06	HL60	0.498875	0	0
6876		BAS-012416453	3.8e-05	PC3	0.498834	0	0
5598	DB00947	fulvestrant	1e-08	MCF7	0.498628	0.01	0.05365
4370	DB00911	tinidazole	1.62e-05	MCF7	0.498492	0.01	0.05365
7363	DB00400	griseofulvin	1.12e-05	PC3	0.497076	0	0
4650		cotinine	2.26e-05	PC3	0.496795	0.01	0.05365
6024	DB04843	mepenzolate bromide	9.6e-06	MCF7	0.496795	0.01	0.05365
6043		Prestwick-685	1.06e-05	MCF7	0.496795	0.01	0.05365
6031	DB13442	citiolone	2.52e-05	MCF7	0.496465	0	0
4353		santonin	1.62e-05	MCF7	0.496317	0.01	0.05365
3129	DB00270	isradipine	1.08e-05	HL60	0.496312	0.01	0.05365
6044		acacetin	1.4e-05	MCF7	0.495324	0	0
4738		Prestwick-674	1.44e-05	MCF7	0.495255	0.01	0.05365
4748		6-benzylaminopurine	1.78e-05	MCF7	0.495192	0.02	0.0794788
4592	DB01602	bacampicillin	8e-06	PC3	0.495021	0.02	0.0794788
2522		napelline	1.12e-05	HL60	0.494942	0	0
2996	DB13744	piromidic acid	1.38e-05	HL60	0.494751	0	0
3185	DB00834	mifepristone	9.4e-06	MCF7	0.494196	0.01	0.05365
490	DB00623	fluphenazine	1e-05	MCF7	0.494002	0	0
2998	DB01021	trichlormethiazide	1.06e-05	HL60	0.49399	0.02	0.0794788
5261	DB01599	probucol	7.8e-06	MCF7	0.493837	0.02	0.0794788
5537	DB00297	bupivacaine	1.24e-05	MCF7	0.49359	0.03	0.09844
5571	DB00755	tretinoin	1e-06	MCF7	0.49359	0.03	0.09844
6125		Prestwick-1084	1.62e-05	HL60	0.4925	0.01	0.05365
3051	DB13740	bemegride	2.58e-05	HL60	0.492238	0.01	0.05365
5630	DB00363	clozapine	1.22e-05	MCF7	0.492084	0	0
3753		famprofazone	1.06e-05	PC3	0.492058	0	0
2266	DB13627	oxolinic acid	1.54e-05	MCF7	0.491748	0	0
4420	DB01421	paromomycin	5.6e-06	MCF7	0.491638	0	0
5616	DB00467	enoxacin	1.24e-05	MCF7	0.491186	0.01	0.05365
5617	DB00975	dipyridamole	8e-06	MCF7	0.491186	0	0
3283	DB00390	digoxin	5.2e-06	MCF7	0.49112	0.02	0.0794788
5563	DB00502	haloperidol	1e-05	MCF7	0.490999	0.04	0.113488
2656	DB01092	ouabain	5.4e-06	MCF7	0.490564	0.04	0.113488
3327	DB00919	spectinomycin	9.8e-06	MCF7	0.490385	0	0
2389	DB00831	trifluoperazine	8.4e-06	HL60	0.490254	0.04	0.113488
3633		0179445-0000	1e-06	MCF7	0.490007	0.02	0.0794788
2717	DB12610	ebselen	1.46e-05	HL60	0.489677	0	0
2927		sanguinarine	1.2e-05	HL60	0.48922	0.02	0.0794788
5579		monorden	1e-07	MCF7	0.488782	0.01	0.05365
3170	DB00595	oxytetracycline	8e-06	MCF7	0.488644	0.02	0.0794788
6048	DB13467	lanatoside C	4e-06	MCF7	0.48824	0.01	0.05365
3944	DB11461	sulfachlorpyridazine	1.4e-05	MCF7	0.488192	0.01	0.05365
5596	DB02656	LY-294002	1e-05	MCF7	0.487981	0.02	0.0794788
3683		Prestwick-685	1.06e-05	PC3	0.487825	0.01	0.05365
3668	DB00779	nalidixic acid	1.46e-05	PC3	0.487176	0.03	0.09844
4316		eucatropine	1.22e-05	PC3	0.48713	0	0
7371		clemizole	1.1e-05	PC3	0.487104	0.05	0.125308
5859	DB12131	vinpocetine	1.14e-05	PC3	0.486927	0.03	0.09844
4549	DB00874	guaifenesin	2.02e-05	PC3	0.486356	0.05	0.125308
3665	DB13715	dilazep	6e-06	PC3	0.48595	0.01	0.05365
3029		dimethadione	3.1e-05	HL60	0.485945	0	0
2304	DB13583	mephenesin	2.2e-05	MCF7	0.485556	0.01	0.05365
2997		fosfosal	1.84e-05	HL60	0.485421	0.02	0.0794788
3555	DB00979	cyclopentolate	1.22e-05	MCF7	0.48537	0.03	0.09844
4648	DB04570	latamoxef	7e-06	PC3	0.485141	0	0
3505	DB01131	proguanil	1.38e-05	MCF7	0.484776	0.02	0.0794788
4226		salsolidin	1.64e-05	PC3	0.48462	0	0
6824		napelline	1.12e-05	MCF7	0.483835	0.02	0.0794788
61	DB00331	metformin	1e-05	MCF7	0.483677	0.05	0.125308
3037		ethaverine	9.2e-06	HL60	0.483393	0	0
6183	DB00831	trifluoperazine	1e-05	HL60	0.483332	0.01	0.05365
5045		adrenosterone	1.34e-05	PC3	0.48304	0	0
2518		butirosin	5.4e-06	HL60	0.482372	0.01	0.05365
6033		Prestwick-664	8.4e-06	MCF7	0.482372	0	0
3552	DB00235	milrinone	1.9e-05	MCF7	0.48232	0.03	0.09844
6155	DB01053	benzylpenicillin	1.12e-05	HL60	0.482101	0.02	0.0794788
2473	DB00738	pentamidine	6.8e-06	HL60	0.481774	0.02	0.0794788
4273	DB11518	flunixin	8.2e-06	PC3	0.481753	0.01	0.05365
606	DB01041	thalidomide	0.0001	MCF7	0.481685	0	0
361	DB02656	LY-294002	1e-05	HL60	0.481551	0.03	0.09844
5586	DB05134	tanespimycin	1e-06	MCF7	0.480924	0.01	0.05365
4440	DB02656	LY-294002	1e-07	PC3	0.480866	0.01	0.05365
5566	DB05134	tanespimycin	1e-06	MCF7	0.480769	0.04	0.113488
6011		hydrastine hydrochloride	9.6e-06	MCF7	0.480334	0.02	0.0794788
4481	DB01424	aminophenazone	1.72e-05	PC3	0.480146	0.03	0.09844
5685	DB01026	ketoconazole	7.6e-06	MCF7	0.479777	0.01	0.05365
2299		kawain	1.74e-05	MCF7	0.479705	0	0
6034		Prestwick-674	1.44e-05	MCF7	0.478677	0	0
2757		piperlongumine	1.26e-05	MCF7	0.478365	0.03	0.09844
5615	DB00567	cefalexin	1.1e-05	MCF7	0.478365	0.01	0.05365
4820		SR-95531	1.08e-05	MCF7	0.478169	0.03	0.09844
2379	DB00656	trazodone	9.8e-06	HL60	0.477977	0.01	0.05365
2451	DB00340	metixene	1.16e-05	HL60	0.477906	0.02	0.0794788
4564	DB01077	etidronic acid	1.6e-05	PC3	0.477499	0.06	0.137491
3373	DB06820	sulconazole	8.6e-06	MCF7	0.477183	0.03	0.09844
6900		0297417-0002B	1e-05	MCF7	0.477163	0.02	0.0794788
3024	DB00590	doxazosin	7.4e-06	HL60	0.477005	0	0
5577	DB00477	chlorpromazine	1e-06	MCF7	0.476763	0.02	0.0794788
6625	DB00999	hydrochlorothiazide	1.34e-05	PC3	0.476317	0.02	0.0794788
5588	DB02424	geldanamycin	1e-06	MCF7	0.476287	0.01	0.05365
6789	DB00866	alprenolol	1.4e-05	MCF7	0.475969	0.02	0.0794788
4009		sulmazole	1.4e-05	PC3	0.475962	0	0
3163	DB01016	glibenclamide	8e-06	MCF7	0.475371	0.01	0.05365
3311	DB08839	serotonin	1.88e-05	MCF7	0.47516	0.02	0.0794788
7511	DB00694	daunorubicin	1e-06	PC3	0.47516	0.05	0.125308
6194	DB01645	genistein	1e-05	HL60	0.474862	0.01	0.05365
6494	DB13449	proxyphylline	1.68e-05	MCF7	0.474531	0.01	0.05365
7323		Prestwick-984	9.2e-06	MCF7	0.474139	0.04	0.113488
4233	DB00387	procyclidine	1.24e-05	PC3	0.474133	0.01	0.05365
3382		3-acetylcoumarin	2.12e-05	MCF7	0.474091	0.05	0.125308
4069	DB00451	levothyroxine sodium	5.2e-06	PC3	0.473558	0	0
5060	DB09069	trimetazidine	1.18e-05	PC3	0.473558	0.01	0.05365
7029	DB06736	aceclofenac	1.12e-05	MCF7	0.473425	0.02	0.0794788
6087		strophanthidin	9.8e-06	MCF7	0.473246	0.01	0.05365
5521		telenzepine	9e-06	MCF7	0.47309	0.06	0.137491
6502		denatonium benzoate	9e-06	MCF7	0.473012	0.03	0.09844
6875		0175029-0000	1e-05	PC3	0.472503	0	0
4311	DB13442	citiolone	2.52e-05	PC3	0.47244	0.01	0.05365
6460	DB11413	florfenicol	1.12e-05	MCF7	0.472343	0.03	0.09844
667	DB01033	mercaptopurine	1e-05	PC3	0.472322	0.03	0.09844
2488	DB00723	methoxamine	1.62e-05	HL60	0.472203	0.1	0.175136
4751	DB01009	ketoprofen	1.58e-05	MCF7	0.471804	0.02	0.0794788
4652	DB00925	phenoxybenzamine	1.18e-05	PC3	0.471631	0.01	0.05365
3341	DB00206	reserpine	6.6e-06	MCF7	0.471611	0.01	0.05365
5701	DB01184	domperidone	7.4e-06	MCF7	0.471544	0.05	0.125308
6045		methylbenzethonium chloride	8.6e-06	MCF7	0.471523	0.02	0.0794788
2482	DB00839	tolazamide	1.28e-05	HL60	0.471315	0.01	0.05365
6025		solasodine	9.6e-06	MCF7	0.471158	0.01	0.05365
3749		solasodine	9.6e-06	PC3	0.471154	0.03	0.09844
6652	DB06820	sulconazole	8.6e-06	PC3	0.471087	0.01	0.05365
6056		benzamil	1.12e-05	MCF7	0.469952	0.03	0.09844
4272	DB00663	flumetasone	9.8e-06	PC3	0.469857	0.01	0.05365
3788	DB00291	chlorambucil	1.32e-05	PC3	0.469551	0.03	0.09844
6816	DB00851	dacarbazine	2.2e-05	MCF7	0.469551	0.07	0.147394
2484	DB00251	terconazole	7.6e-06	HL60	0.469359	0.02	0.0794788
523	DB00947	fulvestrant	1e-06	ssMCF7	0.469032	0	0
6643		thioguanosine	1.26e-05	PC3	0.468959	0	0
362	DB00877	sirolimus	1e-07	HL60	0.468579	0.02	0.0794788
6507	DB00301	flucloxacillin	8.4e-06	MCF7	0.468524	0.05	0.125308
6006	DB01115	nifedipine	1.16e-05	MCF7	0.468213	0.04	0.113488
2713	DB04828	zomepirac	1.28e-05	HL60	0.468067	0.03	0.09844
4357		parbendazole	1.62e-05	MCF7	0.468014	0.02	0.0794788
5506	DB01131	proguanil	1.38e-05	MCF7	0.467949	0.07	0.147394
3001	DB00394	beclometasone	7.6e-06	HL60	0.467817	0.01	0.05365
402	DB00877	sirolimus	1e-07	ssMCF7	0.4675	0	0
6668	DB13740	bemegride	2.58e-05	PC3	0.467106	0.01	0.05365
5997	DB01598	imipenem	1.34e-05	MCF7	0.466346	0.04	0.113488
2490	DB13855	nifuroxazide	1.46e-05	HL60	0.466065	0.04	0.113488
3711	DB13773	sulfamethoxypyridazine	1.42e-05	PC3	0.466028	0.02	0.0794788
3908		CP-320650-01	1e-06	MCF7	0.465958	0.03	0.09844
4457	DB00412	rosiglitazone	1e-05	PC3	0.4658	0.03	0.09844
3288	DB00639	butoconazole	8.4e-06	MCF7	0.465646	0.01	0.05365
4644	DB00346	alfuzosin	9.4e-06	PC3	0.465349	0.01	0.05365
4282	DB01275	hydralazine	2.04e-05	PC3	0.464933	0.01	0.05365
6424		F0447-0125	1e-05	MCF7	0.464813	0.03	0.09844
3531	DB02527	cyclic adenosine monophosphate	1.22e-05	MCF7	0.464744	0.02	0.0794788
5396	DB04209	dequalinium chloride	7.6e-06	MCF7	0.464744	0.06	0.137491
3176	DB13790	fipexide	9.4e-06	MCF7	0.464725	0.02	0.0794788
4603	DB01297	practolol	1.5e-05	PC3	0.464559	0.01	0.05365
2209	DB00704	naltrexone	9.6e-06	MCF7	0.464084	0.05	0.125308
2298	DB00610	metaraminol	8.6e-06	MCF7	0.463942	0.01	0.05365
3789		levcycloserine	3.92e-05	PC3	0.463942	0.01	0.05365
6174	DB00433	prochlorperazine	1e-05	HL60	0.463927	0.02	0.0794788
3681		Prestwick-665	1.16e-05	PC3	0.463786	0	0
2223		acetylsalicylsalicylic acid	1.34e-05	MCF7	0.463736	0.05	0.125308
5967		PF-00875133-00	1e-05	MCF7	0.46364	0	0
6485	DB15581	chrysin	1.58e-05	MCF7	0.463536	0.05	0.125308
4527	DB00615	rifabutin	4.8e-06	PC3	0.463354	0.02	0.0794788
4255		(+/-)-catechin	1.38e-05	PC3	0.463141	0.04	0.113488
6773	DB01114	chlorphenamine	1.02e-05	MCF7	0.462596	0.06	0.137491
2561	DB00266	dicoumarol	1.18e-05	HL60	0.462286	0.02	0.0794788
3370	DB01095	fluvastatin	9.2e-06	MCF7	0.462246	0.02	0.0794788
5517	DB00896	rimexolone	1.08e-05	MCF7	0.462157	0.08	0.157369
2515	DB07931	hexestrol	1.48e-05	HL60	0.462018	0.03	0.09844
4118		gramine	2.3e-05	MCF7	0.461783	0.02	0.0794788
4113		Prestwick-864	3.5e-05	MCF7	0.461496	0.01	0.05365
4257	DB13726	sulfaguanidine	1.86e-05	PC3	0.461408	0	0
336	DB01054	nitrendipine	1e-05	MCF7	0.460946	0	0
2226	DB00421	spironolactone	9.6e-06	MCF7	0.460737	0.04	0.113488
2480	DB01117	atovaquone	1.1e-05	HL60	0.460737	0.05	0.125308
2862	DB09282	molsidomine	1.66e-05	MCF7	0.460737	0.04	0.113488
4306		eldeline	7.8e-06	PC3	0.460491	0.01	0.05365
4390	DB00671	cefixime	8.8e-06	MCF7	0.460081	0.02	0.0794788
3025	DB00316	paracetamol	2.64e-05	HL60	0.460067	0.05	0.125308
4305		solasodine	9.6e-06	PC3	0.460035	0.01	0.05365
6472	DB00712	flurbiprofen	1.64e-05	MCF7	0.45958	0.04	0.113488
4154	DB14038	sitosterol	9.6e-06	MCF7	0.45936	0.01	0.05365
3034	DB06774	capsaicin	1.3e-05	HL60	0.459173	0.01	0.05365
6618		protoveratrine A	5e-06	PC3	0.459135	0.1	0.175136
498		tetraethylenepentamine	0.0001	ssMCF7	0.458985	0.04	0.113488
4645	DB01183	naloxone	1.1e-05	PC3	0.458805	0.04	0.113488
6506		alfadolone	1.02e-05	MCF7	0.45792	0.05	0.125308
2282	DB00355	aztreonam	9.2e-06	MCF7	0.45779	0.03	0.09844
3892	DB00754	ethotoin	1.96e-05	MCF7	0.457771	0.02	0.0794788
5043	DB09210	piracetam	2.82e-05	PC3	0.4577	0.03	0.09844
5614	DB13248	phthalylsulfathiazole	1e-05	MCF7	0.457296	0.03	0.09844
3670		kawain	1.74e-05	PC3	0.456793	0.01	0.05365
4109	DB00594	amiloride	1.32e-05	MCF7	0.456512	0.02	0.0794788
491	DB00988	dopamine	1e-06	MCF7	0.45643	0.06	0.137491
5774		Prestwick-1085	1.46e-05	PC3	0.455828	0.01	0.05365
3050	DB00265	crotamiton	1.96e-05	HL60	0.45576	0.04	0.113488
3624	DB00750	prilocaine	1.56e-05	MCF7	0.455599	0.01	0.05365
4614	DB01394	colchicine	1e-05	PC3	0.455516	0.01	0.05365
3705	DB00253	medrysone	1.16e-05	PC3	0.455153	0.04	0.113488
5578	DB05134	tanespimycin	1e-06	MCF7	0.455065	0.02	0.0794788
574		tetraethylenepentamine	0.0001	MCF7	0.454511	0.03	0.09844
2545	DB00618	demeclocycline	8e-06	HL60	0.454406	0.03	0.09844
610	DB04331	monastrol	0.0001	MCF7	0.45428	0.05	0.125308
5096		telenzepine	9e-06	PC3	0.454095	0.06	0.137491
3169	DB09084	benzydamine	1.16e-05	MCF7	0.453939	0.06	0.137491
2390	DB00357	aminoglutethimide	1.72e-05	HL60	0.453526	0.05	0.125308
612		LM-1685	1e-05	MCF7	0.453314	0.03	0.09844
3933	DB01047	fluocinonide	8e-06	MCF7	0.453134	0.05	0.125308
2478	DB00339	pyrazinamide	3.24e-05	HL60	0.452906	0.04	0.113488
5090	DB13346	bufexamac	1.8e-05	PC3	0.452825	0	0
5680	DB00867	ritodrine	1.24e-05	MCF7	0.452812	0	0
3932		furaltadone	1.1e-05	MCF7	0.452724	0	0
6176	DB00477	chlorpromazine	1e-06	HL60	0.451474	0.03	0.09844
4992	DB00396	progesterone	1.28e-05	MCF7	0.451122	0.04	0.113488
5611		cotinine	2.26e-05	MCF7	0.451122	0.03	0.09844
2881		trichostatin A	1e-07	MCF7	0.451091	0.05	0.125308
4281	DB00978	lomefloxacin	1.04e-05	PC3	0.450914	0.03	0.09844
6082	DB14066	tetrandrine	6.4e-06	MCF7	0.45041	0.02	0.0794788
3942		acacetin	1.4e-05	MCF7	0.449373	0.03	0.09844
4068	DB00527	cinchocaine	1.16e-05	PC3	0.448739	0.01	0.05365
3087	DB01054	nitrendipine	1.1e-05	HL60	0.448626	0.01	0.05365
4289		0179445-0000	1e-05	PC3	0.448527	0.02	0.0794788
5570		alpha-estradiol	1e-08	MCF7	0.448522	0.01	0.05365
6723	DB00794	primidone	1.84e-05	PC3	0.448347	0.01	0.05365
2546	DB13758	meclofenoxate	1.36e-05	HL60	0.44805	0.03	0.09844
4803	DB00747	scopolamine	1.18e-05	MCF7	0.447923	0.05	0.125308
2635	DB00867	ritodrine	1.24e-05	MCF7	0.447885	0.08	0.157369
3931	DB11748	benfotiamine	8.6e-06	MCF7	0.447349	0.04	0.113488
3767		acacetin	1.4e-05	PC3	0.447293	0.01	0.05365
6388	DB01083	orlistat	1e-05	PC3	0.447105	0	0
2410	DB01074	perhexiline	1.02e-05	HL60	0.446594	0.07	0.147394
4408		harman	1.82e-05	MCF7	0.446282	0.03	0.09844
6893	DB01132	pioglitazone	1e-05	PC3	0.446172	0.03	0.09844
2729		securinine	1.84e-05	HL60	0.446114	0.03	0.09844
5968		H-7	0.0001	PC3	0.445964	0.03	0.09844
4845	DB01087	primaquine	8.8e-06	MCF7	0.445742	0.03	0.09844
4242		7-aminocephalosporanic acid	1.46e-05	PC3	0.444946	0.03	0.09844
3712	DB00663	flumetasone	9.8e-06	PC3	0.444861	0.04	0.113488
4231	DB00341	cetirizine	8.6e-06	PC3	0.444849	0	0
3166	DB00257	clotrimazole	1.16e-05	MCF7	0.444813	0.02	0.0794788
3872		trichostatin A	1e-07	MCF7	0.444616	0.03	0.09844
4079	DB00489	sotalol	1.3e-05	PC3	0.444325	0.05	0.125308
3368	DB01004	ganciclovir	1.56e-05	MCF7	0.44391	0.02	0.0794788
3756		furaltadone	1.1e-05	PC3	0.44391	0.02	0.0794788
6645	DB01067	glipizide	9e-06	PC3	0.44391	0.04	0.113488
4075	DB01578	metrizamide	5e-06	PC3	0.443511	0.04	0.113488
364		trichostatin A	1e-07	HL60	0.443461	0.04	0.113488
3930	DB13442	citiolone	2.52e-05	MCF7	0.443355	0	0
3707	DB13758	meclofenoxate	1.36e-05	PC3	0.4428	0.02	0.0794788
7226	DB00670	pirenzepine	9.4e-06	MCF7	0.442563	0.09	0.166566
3179	DB01103	mepacrine	7.8e-06	MCF7	0.44255	0.03	0.09844
5937	DB02656	LY-294002	1e-05	MCF7	0.44244	0.02	0.0794788
6046	DB11461	sulfachlorpyridazine	1.4e-05	MCF7	0.442308	0.02	0.0794788
5699	DB11221	dioxybenzone	1.64e-05	MCF7	0.442213	0.03	0.09844
2444		epiandrosterone	1.38e-05	HL60	0.44196	0.01	0.05365
3750		eldeline	7.8e-06	PC3	0.441346	0.02	0.0794788
3928		famprofazone	1.06e-05	MCF7	0.440869	0.02	0.0794788
2274	DB00423	methocarbamol	1.66e-05	MCF7	0.440705	0.05	0.125308
3297	DB09020	bisacodyl	1.1e-05	MCF7	0.440705	0.06	0.137491
4189	DB01783	calcium pantothenate	8e-06	PC3	0.440705	0.05	0.125308
6644	DB04819	methapyrilene	1.34e-05	PC3	0.440705	0.02	0.0794788
6646	DB00396	progesterone	1.28e-05	PC3	0.440705	0.02	0.0794788
4618		Prestwick-860	3.5e-05	PC3	0.440346	0.02	0.0794788
4143	DB00931	metacycline	8.4e-06	MCF7	0.440288	0.03	0.09844
4078		tetroquinone	2.1e-05	PC3	0.440252	0.05	0.125308
5694	DB13399	terguride	8.8e-06	MCF7	0.439951	0.02	0.0794788
4157	DB00550	propylthiouracil	2.34e-05	MCF7	0.43963	0.01	0.05365
3379	DB15584	luteolin	1.4e-05	MCF7	0.439301	0.04	0.113488
4475	DB01153	sertaconazole	8e-06	PC3	0.438648	0.04	0.113488
3374	DB01223	aminophylline	9.6e-06	MCF7	0.438609	0.06	0.137491
3603	DB00253	medrysone	1.16e-05	MCF7	0.438301	0.03	0.09844
5044	DB08954	ifenprodil	8.4e-06	PC3	0.438301	0.02	0.0794788
4469	DB04284	stachydrine	2.22e-05	PC3	0.437891	0.04	0.113488
2526	DB01112	cefuroxime	9e-06	HL60	0.437878	0.08	0.157369
6095	DB11750	clobetasol	8.6e-06	MCF7	0.437612	0.02	0.0794788
3691		0175029-0000	1e-05	PC3	0.437589	0.04	0.113488
3519	DB00292	etomidate	1.64e-05	MCF7	0.437046	0.04	0.113488
4202		trimethylcolchicinic acid	1.16e-05	PC3	0.437035	0.02	0.0794788
4279	DB08981	fenbufen	1.58e-05	PC3	0.436699	0.03	0.09844
6610	DB00395	carisoprodol	1.54e-05	PC3	0.43633	0.05	0.125308
6405		PF-01378883-00	1e-05	MCF7	0.436304	0	0
4338	DB00379	mexiletine	1.86e-05	PC3	0.436101	0.05	0.125308
3968		PHA-00851261E	1e-06	MCF7	0.436076	0.06	0.137491
2544	DB00253	medrysone	1.16e-05	HL60	0.435992	0.04	0.113488
6058	DB13044	gossypol	7.8e-06	MCF7	0.43579	0.05	0.125308
6475	DB00457	prazosin	9.6e-06	MCF7	0.435465	0.02	0.0794788
4148	DB13499	cefsulodin	7.2e-06	MCF7	0.435318	0.04	0.113488
3840	DB00436	bendroflumethiazide	9.4e-06	MCF7	0.434474	0.05	0.125308
6086	DB00274	cefmetazole	8.2e-06	MCF7	0.434468	0.02	0.0794788
4259		R-atenolol	1.5e-05	PC3	0.43412	0.01	0.05365
3086	DB04842	fluspirilene	8.4e-06	HL60	0.433864	0.06	0.137491
4757		PNU-0230031	1e-06	MCF7	0.433494	0.1	0.175136
4091	DB01600	tiaprofenic acid	1.54e-05	PC3	0.432692	0.02	0.0794788
4225		carcinine	2.2e-05	PC3	0.432692	0.03	0.09844
6649	DB12465	ketanserin	7e-06	PC3	0.432692	0.01	0.05365
6630	DB08966	fursultiamine	9.2e-06	PC3	0.432548	0.07	0.147394
4356		Prestwick-1100	9e-06	MCF7	0.431608	0.01	0.05365
5256	DB01018	guanfacine	1.42e-05	MCF7	0.431567	0.06	0.137491
2543	DB00264	metoprolol	5.8e-06	HL60	0.431489	0.03	0.09844
4063	DB00501	cimetidine	1.58e-05	PC3	0.431385	0.02	0.0794788
6163	DB00502	haloperidol	1e-05	HL60	0.431287	0.03	0.09844
3869	DB00291	chlorambucil	1.32e-05	MCF7	0.43109	0.13	0.196579
4192	DB00778	roxithromycin	4.8e-06	PC3	0.430733	0.05	0.125308
5683		N-acetyl-L-leucine	2.3e-05	MCF7	0.430274	0.02	0.0794788
5664	DB01297	practolol	1.5e-05	MCF7	0.429658	0.02	0.0794788
4839	DB13726	sulfaguanidine	1.86e-05	MCF7	0.429487	0.06	0.137491
3721	DB08981	fenbufen	1.58e-05	PC3	0.429132	0.04	0.113488
3995	DB00176	fluvoxamine	9.2e-06	PC3	0.42906	0.07	0.147394
206	DB00482	celecoxib	1e-05	MCF7	0.427737	0.03	0.09844
2220	DB00699	nicergoline	8.2e-06	MCF7	0.427697	0.05	0.125308
6654	DB00563	methotrexate	8.8e-06	PC3	0.42767	0.04	0.113488
4158	DB00223	diflorasone	8e-06	MCF7	0.427625	0.03	0.09844
609		5666823	0.0001	MCF7	0.427305	0.07	0.147394
3383	DB07118	hymecromone	2.28e-05	MCF7	0.427298	0.06	0.137491
2042	DB09093	chlortetracycline	7.8e-06	HL60	0.426458	0.03	0.09844
5215	DB05134	tanespimycin	1e-06	MCF7	0.426282	0.07	0.147394
4241		amprolium	1.26e-05	PC3	0.426239	0.04	0.113488
4663	DB04815	clioquinol	1.3e-05	PC3	0.425927	0.05	0.125308
2732	DB08947	iopamidol	5.2e-06	HL60	0.425591	0.08	0.157369
4668		bephenium hydroxynaphthoate	9e-06	PC3	0.425513	0.01	0.05365
4067	DB13499	cefsulodin	7.2e-06	PC3	0.425481	0.05	0.125308
2256		etofylline	1.78e-05	MCF7	0.425481	0.07	0.147394
5383	DB00733	pralidoxime	2.32e-05	MCF7	0.42523	0.05	0.125308
6648	DB00882	clomifene	6.6e-06	PC3	0.424615	0.05	0.125308
5965	DB02656	LY-294002	1e-05	MCF7	0.424603	0.01	0.05365
2549	DB09002	cloperastine	1.1e-05	HL60	0.42452	0.07	0.147394
2992	DB00778	roxithromycin	4.8e-06	HL60	0.424073	0.07	0.147394
3366	DB01144	diclofenamide	1.32e-05	MCF7	0.423878	0.04	0.113488
4485	DB00140	riboflavin	1.06e-05	PC3	0.423878	0.09	0.166566
4210	DB00861	diflunisal	1.6e-05	PC3	0.423193	0.04	0.113488
4622		N-acetyl-L-leucine	2.3e-05	PC3	0.422965	0.08	0.157369
5963		H-7	0.0001	MCF7	0.422387	0.05	0.125308
3164	DB00518	albendazole	1.5e-05	MCF7	0.422295	0.03	0.09844
4625	DB01172	kanamycin	6.8e-06	PC3	0.422276	0.11	0.183484
643		W-13	1e-05	MCF7	0.422206	0.04	0.113488
4558		CP-690334-01	1e-05	PC3	0.422136	0.05	0.125308
6076		Prestwick-689	1.02e-05	MCF7	0.421693	0.07	0.147394
2430		velnacrine	1.22e-05	HL60	0.421039	0.04	0.113488
508	DB02010	staurosporine	1e-08	SKMEL5	0.420715	0.08	0.157369
2440	DB13661	niridazole	1.86e-05	HL60	0.420673	0.12	0.19013
4374		alpha-ergocryptine	7e-06	MCF7	0.42053	0.04	0.113488
3754	DB04817	metamizole sodium	1.2e-05	PC3	0.419872	0.01	0.05365
5619		lorglumide	8.4e-06	MCF7	0.419872	0.03	0.09844
4296	DB13044	gossypol	7.8e-06	PC3	0.419857	0.04	0.113488
5770	DB01232	saquinavir	5.2e-06	PC3	0.419529	0.05	0.125308
3877		santonin	1.62e-05	MCF7	0.419071	0.06	0.137491
2254	DB00749	etodolac	1.4e-05	MCF7	0.418659	0.11	0.183484
2423	DB00390	digoxin	5.2e-06	HL60	0.418605	0.05	0.125308
4250		Prestwick-967	2.58e-05	PC3	0.418012	0.04	0.113488
2527		altizide	1.04e-05	HL60	0.417838	0.07	0.147394
3680	DB06786	halcinonide	8.8e-06	PC3	0.417828	0.07	0.147394
3	DB00331	metformin	1e-07	MCF7	0.417354	0.08	0.157369
2569	DB00874	guaifenesin	2.02e-05	HL60	0.416837	0.01	0.05365
4317	DB00746	deferoxamine	6e-06	PC3	0.416416	0.05	0.125308
4230	DB00805	minaprine	1.08e-05	PC3	0.416131	0.05	0.125308
4476		atropine oxide	1.18e-05	PC3	0.415865	0.03	0.09844
455	DB00433	prochlorperazine	1e-05	MCF7	0.4156	0.1	0.175136
4396	DB00738	pentamidine	6.8e-06	MCF7	0.415441	0.06	0.137491
3936	DB00746	deferoxamine	6e-06	MCF7	0.41541	0.07	0.147394
5089	DB01120	gliclazide	1.24e-05	PC3	0.415321	0.02	0.0794788
401	DB02656	LY-294002	1e-05	ssMCF7	0.415133	0.03	0.09844
4314	DB01047	fluocinonide	8e-06	PC3	0.415116	0.11	0.183484
3616	DB01581	sulfamerazine	1.52e-05	MCF7	0.415064	0.05	0.125308
5119	DB01130	prednicarbate	8.2e-06	PC3	0.415064	0.09	0.166566
6201	DB00877	sirolimus	1e-07	HL60	0.414625	0.04	0.113488
3963	DB13467	lanatoside C	4e-06	MCF7	0.414559	0.03	0.09844
255	DB01234	dexamethasone	1e-06	MCF7	0.41448	0.02	0.0794788
3816		lithocholic acid	1.06e-05	PC3	0.414447	0.04	0.113488
2407	DB00982	isotretinoin	1.34e-05	HL60	0.413551	0.11	0.183484
6709		trichostatin A	1e-07	PC3	0.413462	0.04	0.113488
5808		tomatidine	9.6e-06	PC3	0.413072	0.06	0.137491
2504		skimmianine	1.54e-05	HL60	0.41266	0.03	0.09844
4351	DB01325	quinethazone	1.38e-05	MCF7	0.41266	0.09	0.166566
5690	DB00450	droperidol	1.06e-05	MCF7	0.412545	0.04	0.113488
4793	DB02918	zardaverine	1.5e-05	MCF7	0.411859	0.08	0.157369
4657	DB01118	amiodarone	5.8e-06	PC3	0.411612	0.04	0.113488
3678	DB00440	trimethoprim	1.38e-05	PC3	0.411318	0.07	0.147394
4709	DB00986	glycopyrronium bromide	1e-05	MCF7	0.410456	0.09	0.166566
3833	DB00420	promazine	1.24e-05	MCF7	0.409455	0.09	0.166566
5065		trichostatin A	1e-07	PC3	0.409264	0.06	0.137491
5864		abamectin	4.8e-06	PC3	0.409127	0.06	0.137491
6655	DB01010	edrophonium chloride	1.98e-05	PC3	0.408729	0.05	0.125308
3708	DB00367	levonorgestrel	1.28e-05	PC3	0.408706	0.04	0.113488
2516	DB04571	trioxysalen	1.76e-05	HL60	0.408659	0.08	0.157369
6192	DB00412	rosiglitazone	1e-05	HL60	0.408218	0.04	0.113488
4606	DB01011	metyrapone	1.76e-05	PC3	0.408006	0.07	0.147394
573	DB00746	deferoxamine	0.0001	MCF7	0.407878	0.05	0.125308
3577	DB01053	benzylpenicillin	1.12e-05	MCF7	0.407469	0.08	0.157369
6665	DB00927	famotidine	1.18e-05	PC3	0.407316	0.04	0.113488
4462	DB00947	fulvestrant	1e-08	PC3	0.407101	0.1	0.175136
6029		famprofazone	1.06e-05	MCF7	0.407051	0.06	0.137491
2449	DB08839	serotonin	1.88e-05	HL60	0.406722	0.1	0.175136
2476	DB00550	propylthiouracil	2.34e-05	HL60	0.406579	0.02	0.0794788
5677	DB09020	bisacodyl	1.1e-05	MCF7	0.406454	0.06	0.137491
3623		6-benzylaminopurine	1.78e-05	MCF7	0.405863	0.06	0.137491
2463		salsolidin	1.64e-05	HL60	0.405449	0.11	0.183484
3759		eucatropine	1.22e-05	PC3	0.405448	0.05	0.125308
6193		trichostatin A	1e-06	HL60	0.404647	0.04	0.113488
3175	DB00568	cinnarizine	1.08e-05	MCF7	0.404384	0.06	0.137491
2246	DB00951	isoniazid	2.92e-05	MCF7	0.403846	0.07	0.147394
371	DB00533	rofecoxib	1e-05	HL60	0.403386	0.12	0.19013
4229	DB13532	cyclopenthiazide	1.06e-05	PC3	0.403218	0.01	0.05365
6132	DB00979	cyclopentolate	1.22e-05	HL60	0.402664	0.06	0.137491
4004		boldine	1.22e-05	PC3	0.402284	0.05	0.125308
605	DB04331	monastrol	2e-05	MCF7	0.402105	0.03	0.09844
454	DB14206	cobalt chloride	0.0001	MCF7	0.401659	0.06	0.137491
343	DB08162	fasudil	1e-05	MCF7	0.401597	0.09	0.166566
3348	DB00928	azacitidine	1.64e-05	MCF7	0.401442	0.04	0.113488
5663	DB01035	procainamide	1.48e-05	MCF7	0.401442	0.09	0.166566
256	DB00533	rofecoxib	1e-05	MCF7	0.401241	0.03	0.09844
4083	DB00726	trimipramine	9.8e-06	PC3	0.400799	0.04	0.113488
6518		enilconazole	1.34e-05	MCF7	0.400641	0.04	0.113488
5504	DB00722	lisinopril	9e-06	MCF7	0.39984	0.1	0.175136
419	DB00477	chlorpromazine	1e-05	MCF7	0.399705	0.1	0.175136
6035		heliotrine	1.28e-05	MCF7	0.399367	0.07	0.147394
2195		lycorine	1.24e-05	HL60	0.399167	0.11	0.183484
3966		0317956-0000	1e-05	MCF7	0.398975	0.03	0.09844
5451	DB11371	alfaxalone	1.2e-05	MCF7	0.398404	0.05	0.125308
5062	DB14075	imidurea	1.04e-05	PC3	0.398237	0.07	0.147394
5075		hydrastinine	1.64e-05	PC3	0.397947	0.06	0.137491
3384		(+)-isoprenaline	1.1e-05	MCF7	0.397714	0.15	0.210103
6403	DB00580	valdecoxib	1e-05	MCF7	0.39754	0.01	0.05365
5771	DB00324	fluorometholone	1.06e-05	PC3	0.397479	0.11	0.183484
205	DB00533	rofecoxib	1e-05	MCF7	0.397364	0.11	0.183484
3807		beta-escin	3.2e-06	PC3	0.397017	0.07	0.147394
2255	DB13415	pentetrazol	2.9e-05	MCF7	0.396826	0.12	0.19013
4615	DB11442	oleandomycin	5e-06	PC3	0.396743	0.11	0.183484
1208	DB00783	estradiol	1e-07	PC3	0.396635	0.03	0.09844
3563	DB04573	estriol	1.38e-05	MCF7	0.396635	0.09	0.166566
4147	DB11477	xylazine	1.82e-05	MCF7	0.396635	0.05	0.125308
4703	DB06786	halcinonide	8.8e-06	MCF7	0.396635	0.08	0.157369
6394		C-75	1e-05	MCF7	0.395936	0.01	0.05365
3923	DB00180	flunisolide	9.2e-06	MCF7	0.395844	0.03	0.09844
4430	DB05134	tanespimycin	1e-06	PC3	0.395413	0.08	0.157369
3568	DB01580	oxprenolol	1.32e-05	MCF7	0.395358	0.04	0.113488
3717		heliotrine	1.28e-05	PC3	0.395249	0.06	0.137491
3566		trichostatin A	1e-07	MCF7	0.395032	0.08	0.157369
3805	DB11410	fenbendazole	1.34e-05	PC3	0.394688	0.05	0.125308
4367	DB08936	chlorcyclizine	1.18e-05	MCF7	0.393721	0.05	0.125308
4089	DB09088	amylocaine	1.48e-05	PC3	0.392679	0.06	0.137491
6504		Prestwick-981	1.08e-05	MCF7	0.392671	0.06	0.137491
1416	DB00356	chlorzoxazone	2.36e-05	HL60	0.391249	0.07	0.147394
6620	DB08960	hexamethonium bromide	1e-05	PC3	0.391026	0.16	0.217178
3800	DB01000	ciclacillin	1.18e-05	PC3	0.390797	0.05	0.125308
2038	DB01406	danazol	1.18e-05	HL60	0.390294	0.06	0.137491
404	DB08059	wortmannin	1e-08	ssMCF7	0.389158	0.03	0.09844
7533		11-deoxy-16,16-dimethylprostaglandin E2	1e-05	MCF7	0.38887	0.07	0.147394
499	DB01051	novobiocin	0.0001	ssMCF7	0.388645	0.09	0.166566
6159	DB01413	cefepime	7.4e-06	HL60	0.388636	0.16	0.217178
3762	DB06145	spiramycin	4.8e-06	PC3	0.388622	0.05	0.125308
3992	DB03783	phenacetin	2.24e-05	PC3	0.388125	0.07	0.147394
6040	DB06786	halcinonide	8.8e-06	MCF7	0.38802	0.09	0.166566
2687	DB02656	LY-294002	1e-05	HL60	0.387821	0.08	0.157369
5460	DB13783	acemetacin	9.6e-06	MCF7	0.38766	0.16	0.217178
4206		pepstatin	5.8e-06	PC3	0.386928	0.04	0.113488
4274	DB00573	fenoprofen	7.2e-06	PC3	0.3868	0.08	0.157369
442		oligomycin	1e-06	MCF7	0.386702	0.15	0.210103
3906		CP-690334-01	1e-05	MCF7	0.386209	0.1	0.175136
335	DB01115	nifedipine	1e-05	MCF7	0.385769	0.03	0.09844
5674	DB01244	bepridil	1e-05	MCF7	0.385681	0.07	0.147394
2737	DB00254	doxycycline	8.4e-06	HL60	0.385507	0.09	0.166566
6070	DB11125	benzethonium chloride	9e-06	MCF7	0.385417	0.07	0.147394
3054	DB00600	monobenzone	2e-05	HL60	0.385193	0.15	0.210103
5779		ellipticine	1.62e-05	PC3	0.384243	0.06	0.137491
3113	DB00807	proxymetacaine	1.2e-05	HL60	0.383673	0.08	0.157369
1770	DB05137	lobeline	1.06e-05	HL60	0.382765	0.11	0.183484
3929	DB04817	metamizole sodium	1.2e-05	MCF7	0.382702	0.07	0.147394
3048	DB00818	propofol	2.24e-05	HL60	0.382256	0.06	0.137491
2251	DB00863	ranitidine	1.14e-05	MCF7	0.382212	0.08	0.157369
3836	DB13442	citiolone	2.52e-05	MCF7	0.382212	0.06	0.137491
4073	DB14038	sitosterol	9.6e-06	PC3	0.381566	0.07	0.147394
6088	DB01112	cefuroxime	9e-06	MCF7	0.381311	0.07	0.147394
3998		etifenin	1.24e-05	PC3	0.381193	0.13	0.196579
3671	DB00643	mebendazole	1.36e-05	PC3	0.380529	0.19	0.238085
434	DB06819	sodium phenylbutyrate	0.001	PC3	0.380303	0.04	0.113488
4491		altizide	1.04e-05	PC3	0.379006	0.09	0.166566
3710	DB09002	cloperastine	1.1e-05	PC3	0.378981	0.08	0.157369
2258	DB01041	thalidomide	1.54e-05	MCF7	0.378251	0.11	0.183484
7534	DB00947	fulvestrant	1e-06	MCF7	0.378214	0.03	0.09844
3618	DB08981	fenbufen	1.58e-05	MCF7	0.378085	0.11	0.183484
2681	DB00877	sirolimus	1e-07	HL60	0.377963	0.06	0.137491
7043		trichostatin A	1e-06	MCF7	0.3779	0.09	0.166566
6384		0225151-0000	1e-05	MCF7	0.377605	0.06	0.137491
4458		trichostatin A	1e-06	PC3	0.377489	0.09	0.166566
5679		Prestwick-860	3.5e-05	MCF7	0.376761	0.1	0.175136
485	DB00746	deferoxamine	0.0001	MCF7	0.376753	0.07	0.147394
6642	DB00590	doxazosin	7.4e-06	PC3	0.376725	0.08	0.157369
3182	DB01242	clomipramine	1.14e-05	MCF7	0.375741	0.04	0.113488
642	DB00352	tioguanine	1e-05	MCF7	0.375498	0.13	0.196579
4659	DB02187	equilin	1.5e-05	PC3	0.375284	0.09	0.166566
3669	DB00610	metaraminol	8.6e-06	PC3	0.375091	0.09	0.166566
4747	DB00914	phenformin	1.66e-05	MCF7	0.374127	0.13	0.196579
3924		solasodine	9.6e-06	MCF7	0.373866	0.11	0.183484
333	DB00586	diclofenac	1e-05	MCF7	0.373561	0.16	0.217178
2672		trichostatin A	1e-07	HL60	0.373397	0.07	0.147394
3028	DB04570	latamoxef	7e-06	HL60	0.372163	0.03	0.09844
5768	DB00473	hexylcaine	1.34e-05	PC3	0.371703	0.08	0.157369
3763	DB00319	piperacillin	7.4e-06	PC3	0.370525	0.11	0.183484
5775	DB00699	nicergoline	8.2e-06	PC3	0.370511	0.12	0.19013
3996	DB00892	oxybuprocaine	1.16e-05	PC3	0.370203	0.09	0.166566
4249	DB08951	indoprofen	1.42e-05	PC3	0.369499	0.14	0.203382
3346	DB01357	mestranol	1.28e-05	MCF7	0.369447	0.07	0.147394
3969		0317956-0000	1e-06	MCF7	0.36943	0.12	0.19013
2669	DB00313	valproic acid	0.001	HL60	0.369391	0.14	0.203382
639	DB00738	pentamidine	0.0001	MCF7	0.369299	0.13	0.196579
2242	DB01234	dexamethasone	9.2e-06	MCF7	0.369235	0.14	0.203382
3830		solasodine	9.6e-06	MCF7	0.36848	0.08	0.157369
6615	DB01110	miconazole	9.6e-06	PC3	0.367615	0.09	0.166566
2537	DB01438	phenazopyridine	1.6e-05	HL60	0.366505	0.11	0.183484
593	DB02424	geldanamycin	1e-06	MCF7	0.365544	0.08	0.157369
5078	DB00250	dapsone	1.62e-05	PC3	0.364429	0.15	0.210103
445	DB00586	diclofenac	1e-05	PC3	0.364362	0.14	0.203382
6367		3-nitropropionic acid	1e-05	MCF7	0.36427	0.04	0.113488
6729	DB00199	erythromycin	5.4e-06	PC3	0.362623	0.14	0.203382
3395		trichostatin A	1e-07	MCF7	0.362179	0.15	0.210103
4674	DB00712	flurbiprofen	1.64e-05	PC3	0.362179	0.09	0.166566
4313		furaltadone	1.1e-05	PC3	0.361835	0.1	0.175136
7531		BCB000039	1e-05	MCF7	0.360857	0.09	0.166566
4327		helveticoside	7.4e-06	PC3	0.360758	0.16	0.217178
253		LM-1685	1e-05	MCF7	0.36039	0.03	0.09844
4349	DB00615	rifabutin	4.8e-06	MCF7	0.359895	0.1	0.175136
4620	DB11622	dehydrocholic acid	9.6e-06	PC3	0.359861	0.11	0.183484
4188	DB13478	meptazinol	1.48e-05	PC3	0.359776	0.12	0.19013
363	DB06819	sodium phenylbutyrate	0.0001	HL60	0.359509	0.11	0.183484
3674	DB00698	nitrofurantoin	1.68e-05	PC3	0.358764	0.14	0.203382
5047	DB00446	chloramphenicol	1.24e-05	PC3	0.358173	0.08	0.157369
6051		lycorine	1.24e-05	MCF7	0.35753	0.17	0.224653
5927	DB00877	sirolimus	1e-07	MCF7	0.355384	0.11	0.183484
3973	DB00379	mexiletine	1.86e-05	MCF7	0.354968	0.14	0.203382
5053		antimycin A	7.2e-06	PC3	0.354618	0.06	0.137491
5071	DB04552	niflumic acid	1.42e-05	PC3	0.353985	0.09	0.166566
6079	DB00456	cefalotin	9.6e-06	MCF7	0.353912	0.12	0.19013
4302		trichostatin A	1e-07	PC3	0.353233	0.11	0.183484
481		pirinixic acid	0.0001	PC3	0.353054	0.08	0.157369
5794	DB00703	methazolamide	1.7e-05	PC3	0.352668	0.13	0.196579
3832		pempidine	1.3e-05	MCF7	0.352077	0.1	0.175136
1373	DB01190	clindamycin	8.6e-06	HL60	0.351287	0.11	0.183484
3715		Prestwick-664	8.4e-06	PC3	0.350962	0.17	0.224653
4234	DB07814	gibberellic acid	1.16e-05	PC3	0.350962	0.1	0.175136
6189	DB00679	thioridazine	1e-05	HL60	0.350962	0.1	0.175136
4160	DB00489	sotalol	1.3e-05	MCF7	0.35001	0.11	0.183484
6423		C-75	1e-05	MCF7	0.34849	0.09	0.166566
602	DB00091	ciclosporin	1e-06	MCF7	0.347553	0.21	0.254773
486		calmidazolium	5e-06	MCF7	0.345573	0.17	0.224653
6047		helveticoside	7.4e-06	MCF7	0.344419	0.15	0.210103
3685	DB01365	mephentermine	9.4e-06	PC3	0.342737	0.14	0.203382
3844	DB06145	spiramycin	4.8e-06	MCF7	0.342147	0.14	0.203382
4096	DB00521	carteolol	1.22e-05	PC3	0.342146	0.13	0.196579
4450	DB05134	tanespimycin	1e-06	PC3	0.340153	0.15	0.210103
2694		trichostatin A	1e-06	HL60	0.340025	0.2	0.245968
5780		methanthelinium bromide	9.6e-06	PC3	0.338631	0.14	0.203382
6435		AG-013608	1e-05	MCF7	0.338609	0.1	0.175136
6069	DB06764	tetryzoline	1.68e-05	MCF7	0.3386	0.08	0.157369
6402		3-nitropropionic acid	1e-05	MCF7	0.338584	0.06	0.137491
5987		trichostatin A	1e-07	MCF7	0.335266	0.21	0.254773
5960	DB00783	estradiol	1e-08	PC3	0.334135	0.12	0.19013
5388	DB00639	butoconazole	8.4e-06	MCF7	0.333524	0.13	0.196579
2699	DB02656	LY-294002	1e-05	HL60	0.330969	0.16	0.217178
3177		trichostatin A	1e-07	MCF7	0.330497	0.19	0.238085
5055	DB00717	norethisterone	1.34e-05	PC3	0.328526	0.1	0.175136
208		SC-58125	1e-05	MCF7	0.328477	0.09	0.166566
1712	DB00954	dirithromycin	4.8e-06	HL60	0.327502	0.13	0.196579
3676	DB01090	pentolonium	7.4e-06	PC3	0.327477	0.13	0.196579
316	DB02266	flufenamic acid	1e-05	MCF7	0.327247	0.09	0.166566
2257	DB00848	levamisole	1.66e-05	MCF7	0.326923	0.14	0.203382
5911	DB14057	valinomycin	1e-07	PC3	0.325443	0.16	0.217178
6427		STOCK1N-35215	1e-05	PC3	0.325045	0.18	0.231158
3629		PNU-0230031	1e-05	MCF7	0.324519	0.23	0.273276
3761	DB01195	flecainide	8.4e-06	PC3	0.322917	0.13	0.196579
6711	DB08437	puromycin	7.4e-06	PC3	0.322378	0.15	0.210103
2236	DB01622	thioproperazine	6.2e-06	MCF7	0.322114	0.2	0.245968
6415	DB01083	orlistat	1e-05	MCF7	0.320513	0.17	0.224653
6364		erastin	2e-05	MCF7	0.320321	0.17	0.224653
4664		3-acetylcoumarin	2.12e-05	PC3	0.318773	0.15	0.210103
5693		trichostatin A	1e-07	MCF7	0.316946	0.15	0.210103
4161	DB01140	cefadroxil	1.1e-05	MCF7	0.316685	0.12	0.19013
5935		trichostatin A	1e-06	MCF7	0.316276	0.2	0.245968
3196		tremorine	1.5e-05	MCF7	0.315925	0.15	0.210103
4262	DB00797	tolazoline	2.04e-05	PC3	0.30881	0.23	0.273276
433	DB00313	valproic acid	0.001	PC3	0.308695	0.16	0.217178
6395		AG-013608	1e-05	MCF7	0.308671	0.07	0.147394
5052	DB11100	allantoin	2.52e-05	PC3	0.308494	0.17	0.224653
5920	DB11457	rotenone	1e-06	PC3	0.306891	0.24	0.28268
315	DB00945	acetylsalicylic acid	0.0001	MCF7	0.306491	0.11	0.183484
264		MK-886	1e-06	MCF7	0.305957	0.17	0.224653
5625		trichostatin A	1e-07	MCF7	0.304945	0.19	0.238085
223	DB02877	TTNPB	1e-07	MCF7	0.303089	0.15	0.210103
6378	DB00580	valdecoxib	1e-05	PC3	0.300478	0.2	0.245968
5116	DB00764	mometasone	7.6e-06	PC3	0.299854	0.15	0.210103
2987	DB00919	spectinomycin	9.8e-06	HL60	0.296856	0.18	0.231158
3738		benzamil	1.12e-05	PC3	0.294872	0.22	0.264017
448		trichostatin A	1e-07	PC3	0.294666	0.21	0.254773
4006	DB01096	oxamniquine	1.44e-05	PC3	0.292468	0.16	0.217178
403		alpha-estradiol	1e-08	ssMCF7	0.288507	0.13	0.196579
4090	DB02375	myricetin	1.26e-05	PC3	0.287785	0.23	0.273276
5919	DB05134	tanespimycin	1e-06	PC3	0.285172	0.13	0.196579
1749	DB01426	ajmaline	1.22e-05	HL60	0.285012	0.25	0.292875
4451	DB02656	LY-294002	1e-05	PC3	0.274077	0.2	0.245968
331		trichostatin A	1e-07	MCF7	0.271855	0.26	0.302903
5915	DB11457	rotenone	1e-06	MCF7	0.221161	0.16	0.217178
1	DB00331	metformin	1e-05	MCF7	0	0.18	0.231158
2	DB00331	metformin	1e-05	MCF7	0	0.21	0.254773
4	DB00331	metformin	0.001	MCF7	0	0.12	0.19013
21	DB00914	phenformin	1e-05	MCF7	0	0.13	0.196579
22		phenyl biguanide	1e-05	MCF7	0	0.07	0.147394
23	DB00313	valproic acid	0.001	MCF7	0	0.12	0.19013
121	DB00783	estradiol	1e-08	MCF7	0	0.07	0.147394
122		alpha-estradiol	1e-08	MCF7	0	0.04	0.113488
123	DB01234	dexamethasone	1e-06	MCF7	0	0.04	0.113488
124	DB00244	mesalazine	0.0001	MCF7	0	0.02	0.0794788
141	DB00672	chlorpropamide	0.0001	MCF7	0	0.08	0.157369
143	DB00675	tamoxifen	1e-06	MCF7	0	0.08	0.157369
161	DB00661	verapamil	1e-05	MCF7	0	0.01	0.05365
164	DB14063	dexverapamil	1e-05	MCF7	0	0.02	0.0794788
165	DB00990	exemestane	1e-08	MCF7	0	0.03	0.09844
166	DB00533	rofecoxib	1e-05	MCF7	0	0	0
167	DB00321	amitriptyline	1e-06	MCF7	0	0.16	0.217178
168	DB00605	sulindac	0.0001	MCF7	0	0.07	0.147394
169	DB00864	tacrolimus	1e-06	MCF7	0	0.09	0.166566
201		15-delta prostaglandin J2	1e-05	MCF7	0	0.22	0.264017
202	DB00481	raloxifene	1e-07	MCF7	0	0.1	0.175136
203	DB00179	nordihydroguaiaretic acid	1e-06	MCF7	0	0.17	0.224653
204	DB00795	sulfasalazine	0.0001	MCF7	0	0.07	0.147394
207		LM-1685	1e-05	MCF7	0	0.12	0.19013
221	DB05134	tanespimycin	1e-07	MCF7	0	0.28	0.324099
224	DB00755	tretinoin	1e-06	MCF7	0	0.26	0.302903
251	DB00533	rofecoxib	1e-05	MCF7	0	0.22	0.264017
252	DB00482	celecoxib	1e-05	MCF7	0	0.26	0.302903
254		SC-58125	1e-05	MCF7	0	0.22	0.264017
258	DB02656	LY-294002	1e-05	MCF7	0	0.16	0.217178
261	DB00091	ciclosporin	1e-06	MCF7	0	0.27	0.313177
262	DB00328	indometacin	2e-05	MCF7	0	0.27	0.313177
263	DB00636	clofibrate	0.00015	MCF7	0	0.27	0.313177
266	DB01041	thalidomide	0.0001	MCF7	0	0.3	0.346263
267	DB01645	genistein	1e-06	MCF7	0	0.31	0.357264
268	DB01645	genistein	1e-06	MCF7	0	0.29	0.335165
282	DB00687	fludrocortisone	1e-06	MCF7	0	0.26	0.302903
283	DB04216	quercetin	1e-06	MCF7	0	0.12	0.19013
307	DB00605	sulindac	5e-05	MCF7	0	0.15	0.210103
308		sulindac sulfide	5e-05	MCF7	0	0.05	0.125308
309	DB06246	exisulind	5e-05	MCF7	0	0.09	0.166566
310	DB00947	fulvestrant	1e-08	MCF7	0	0.07	0.147394
313		NU-1025	0.0001	MCF7	0	0.21	0.254773
314	DB06246	exisulind	5e-05	MCF7	0	0.26	0.302903
317		N-phenylanthranilic acid	1e-05	MCF7	0	0.31	0.357264
318	DB02656	LY-294002	1e-05	MCF7	0	0.26	0.302903
327		arachidonyltrifluoromethane	1e-05	MCF7	0	0.12	0.19013
328	DB02656	LY-294002	1e-05	MCF7	0	0.12	0.19013
334	DB01033	mercaptopurine	0.0001	MCF7	0	0.19	0.238085
337	DB01023	felodipine	1e-05	MCF7	0	0.24	0.28268
341	DB06819	sodium phenylbutyrate	0.0001	MCF7	0	0.16	0.217178
342	DB01051	novobiocin	0.0001	MCF7	0	0.17	0.224653
344	DB08831	2-deoxy-D-glucose	0.01	MCF7	0	0.21	0.254773
346	DB00313	valproic acid	0.002	MCF7	0	0.17	0.224653
347	DB00313	valproic acid	0.0005	MCF7	0	0.16	0.217178
348	DB00313	valproic acid	5e-05	MCF7	0	0.16	0.217178
365	DB00783	estradiol	1e-07	MCF7	0	0.18	0.231158
367	DB00947	fulvestrant	1e-06	MCF7	0	0.26	0.302903
368		pirinixic acid	0.0001	MCF7	0	0.23	0.273276
370	DB00197	troglitazone	1e-05	HL60	0	0.14	0.203382
373	DB00783	estradiol	1e-08	ssMCF7	0	0.18	0.231158
375	DB00675	tamoxifen	1e-06	ssMCF7	0	0.11	0.183484
376	DB00481	raloxifene	1e-07	ssMCF7	0	0.13	0.196579
378	DB00864	tacrolimus	1e-06	MCF7	0	0.05	0.125308
380	DB00675	tamoxifen	1e-06	MCF7	0	0.07	0.147394
382	DB01645	genistein	1e-05	MCF7	0	0.15	0.210103
383	DB14206	cobalt chloride	0.0001	MCF7	0	0.17	0.224653
387	DB00783	estradiol	1e-08	HL60	0	0.13	0.196579
388	DB00481	raloxifene	1e-07	HL60	0	0.19	0.238085
389	DB08059	wortmannin	1e-08	HL60	0	0.12	0.19013
390	DB00755	tretinoin	1e-06	HL60	0	0.1	0.175136
405		tetraethylenepentamine	1e-05	MCF7	0	0.27	0.313177
406		tetraethylenepentamine	0.0001	MCF7	0	0.2	0.245968
407	DB06819	sodium phenylbutyrate	0.001	MCF7	0	0.17	0.224653
408	DB06819	sodium phenylbutyrate	0.001	MCF7	0	0.13	0.196579
409	DB00313	valproic acid	0.001	HL60	0	0.25	0.292875
410	DB00313	valproic acid	0.01	HL60	0	0.15	0.210103
412		tetraethylenepentamine	0.0001	HL60	0	0.09	0.166566
413		trichostatin A	1e-07	ssMCF7	0	0.24	0.28268
414	DB00783	estradiol	1e-08	ssMCF7	0	0.2	0.245968
415	DB00179	nordihydroguaiaretic acid	1e-06	ssMCF7	0	0.23	0.273276
416	DB00363	clozapine	1e-05	MCF7	0	0.12	0.19013
417	DB00679	thioridazine	1e-05	MCF7	0	0.12	0.19013
422	DB00679	thioridazine	1e-06	MCF7	0	0.05	0.125308
425	DB02010	staurosporine	1e-08	MCF7	0	0.07	0.147394
426	DB00477	chlorpromazine	1e-06	MCF7	0	0.07	0.147394
427	DB01088	iloprost	1e-06	MCF7	0	0.11	0.183484
428	DB05134	tanespimycin	1e-06	MCF7	0	0.09	0.166566
429	DB02656	LY-294002	1e-05	PC3	0	0.16	0.217178
431	DB00197	troglitazone	1e-05	PC3	0	0.2	0.245968
435	DB01051	novobiocin	0.0001	PC3	0	0.28	0.324099
436	DB08162	fasudil	1e-05	PC3	0	0.11	0.183484
437	DB01051	novobiocin	0.0001	MCF7	0	0.14	0.203382
439	DB03940	oxamic acid	0.01	MCF7	0	0.11	0.183484
441	DB04557	arachidonic acid	1e-05	MCF7	0	0.12	0.19013
443	DB04557	arachidonic acid	1e-05	MCF7	0	0.12	0.19013
444	DB00636	clofibrate	0.0001	MCF7	0	0.13	0.196579
446		15-delta prostaglandin J2	1e-05	PC3	0	0.18	0.231158
447	DB00755	tretinoin	1e-06	PC3	0	0.15	0.210103
452	DB00328	indometacin	0.0001	PC3	0	0.17	0.224653
453	DB00328	indometacin	0.0001	MCF7	0	0.07	0.147394
456		quinpirole	1e-06	MCF7	0	0.19	0.238085
458	DB00313	valproic acid	0.001	PC3	0	0.02	0.0794788
459	DB06778	copper sulfate	0.0001	PC3	0	0.02	0.0794788
460	DB00746	deferoxamine	0.0001	PC3	0	0.04	0.113488
461	DB02656	LY-294002	1e-05	PC3	0	0.12	0.19013
462	DB00197	troglitazone	1e-05	PC3	0	0.19	0.238085
463	DB00533	rofecoxib	1e-05	PC3	0	0.12	0.19013
464		pirinixic acid	0.0001	PC3	0	0.11	0.183484
482	DB00482	celecoxib	1e-05	PC3	0	0.24	0.28268
483	DB00619	imatinib	1e-05	PC3	0	0.22	0.264017
484		monorden	1e-07	PC3	0	0.23	0.273276
488	DB01088	iloprost	1e-06	MCF7	0	0.15	0.210103
489		monorden	1e-07	MCF7	0	0.14	0.203382
492	DB00502	haloperidol	1e-05	MCF7	0	0.17	0.224653
494	DB00623	fluphenazine	1e-05	SKMEL5	0	0.16	0.217178
495		pirinixic acid	0.0001	SKMEL5	0	0.07	0.147394
497	DB00313	valproic acid	0.001	ssMCF7	0	0.21	0.254773
500	DB06778	copper sulfate	0.0001	ssMCF7	0	0.14	0.203382
502	DB06819	sodium phenylbutyrate	0.0002	SKMEL5	0	0.22	0.264017
503	DB00328	indometacin	0.0001	SKMEL5	0	0.13	0.196579
504	DB00197	troglitazone	1e-05	SKMEL5	0	0.1	0.175136
505	DB05134	tanespimycin	1e-06	SKMEL5	0	0.1	0.175136
506	DB08059	wortmannin	1e-08	SKMEL5	0	0.15	0.210103
524	DB00179	nordihydroguaiaretic acid	1e-06	ssMCF7	0	0.06	0.137491
541	DB00317	gefitinib	1e-05	HL60	0	0.05	0.125308
542		SC-58125	1e-05	HL60	0	0.07	0.147394
543		1,5-isoquinolinediol	0.0001	HL60	0	0.08	0.157369
544		monorden	1e-07	HL60	0	0.05	0.125308
564		15-delta prostaglandin J2	1e-05	SKMEL5	0	0.03	0.09844
575	DB06778	copper sulfate	0.0001	MCF7	0	0.14	0.203382
578		4,5-dianilinophthalimide	1e-05	PC3	0	0.03	0.09844
579	DB07795	fisetin	5e-05	PC3	0	0	0
583		HNMPA-(AM)3	5e-06	PC3	0	0.15	0.210103
584		dimethyloxalylglycine	0.001	PC3	0	0.14	0.203382
590		3-aminobenzamide	0.01	MCF7	0	0.03	0.09844
591	DB13242	bucladesine	2e-05	MCF7	0	0.04	0.113488
592	DB01599	probucol	1e-05	MCF7	0	0.12	0.19013
594		arachidonyltrifluoromethane	1e-05	MCF7	0	0.07	0.147394
595	DB02709	resveratrol	5e-05	MCF7	0	0.14	0.203382
601		MK-886	1e-06	MCF7	0	0.2	0.245968
603	DB01115	nifedipine	1e-05	MCF7	0	0.19	0.238085
604	DB04557	arachidonic acid	1e-05	MCF7	0	0.09	0.166566
608		NU-1025	0.0001	MCF7	0	0.22	0.264017
611	DB02424	geldanamycin	1e-06	MCF7	0	0.04	0.113488
614	DB04331	monastrol	2e-05	MCF7	0	0	0
621	DB08313	nocodazole	1e-06	MCF7	0	0.01	0.05365
622	DB02709	resveratrol	5e-05	MCF7	0	0	0
624		4,5-dianilinophthalimide	1e-05	MCF7	0	0.01	0.05365
627	DB04331	monastrol	0.0001	MCF7	0	0	0
629	DB00313	valproic acid	0.001	SKMEL5	0	0.01	0.05365
630	DB01394	colchicine	1e-06	SKMEL5	0	0	0
631	DB12783	benserazide	1e-05	SKMEL5	0	0.02	0.0794788
632	DB01051	novobiocin	0.0001	SKMEL5	0	0.01	0.05365
638	DB01645	genistein	1e-05	MCF7	0	0.12	0.19013
640	DB01229	paclitaxel	1e-07	MCF7	0	0.07	0.147394
644	DB01394	colchicine	1e-07	MCF7	0	0.14	0.203382
661		splitomicin	2e-05	PC3	0	0.1	0.175136
662	DB02709	resveratrol	5e-05	PC3	0	0.08	0.157369
663		U0125	1e-06	PC3	0	0.1	0.175136
664		docosahexaenoic acid ethyl ester	0.0001	PC3	0	0.08	0.157369
665	DB00783	estradiol	1e-08	PC3	0	0.13	0.196579
666		butirosin	1e-05	PC3	0	0.15	0.210103
668	DB04331	monastrol	0.0001	PC3	0	0.09	0.166566
681	DB04331	monastrol	0.0001	MCF7	0	0.01	0.05365
702		alpha-estradiol	1e-08	PC3	0	0.04	0.113488
703	DB01645	genistein	1e-05	PC3	0	0.01	0.05365
704	DB00947	fulvestrant	1e-06	PC3	0	0	0
762		alpha-estradiol	1e-08	MCF7	0	0.03	0.09844
782	DB00783	estradiol	1e-08	HL60	0	0	0
783	DB02587	colforsin	5e-05	HL60	0	0	0
826	DB00457	prazosin	1e-05	MCF7	0	0.01	0.05365
828		5252917	1.4e-05	MCF7	0	0.03	0.09844
832		Y-27632	3e-06	MCF7	0	0.01	0.05365
833		5255229	1.3e-05	MCF7	0	0	0
834		5211181	1.2e-05	MCF7	0	0.01	0.05365
835	DB00564	carbamazepine	1e-07	MCF7	0	0.02	0.0794788
836		monorden	1e-07	MCF7	0	0	0
837		blebbistatin	1.7e-05	MCF7	0	0.03	0.09844
838		5248896	1.1e-05	MCF7	0	0.03	0.09844
839		5224221	1.2e-05	MCF7	0	0.02	0.0794788
841	DB02709	resveratrol	1e-05	MCF7	0	0.02	0.0794788
842	DB13242	bucladesine	2e-06	MCF7	0	0.01	0.05365
843		5279552	2.2e-05	MCF7	0	0	0
844		5253409	1.7e-05	MCF7	0	0.06	0.137491
848	DB01023	felodipine	1e-05	MCF7	0	0.03	0.09844
862		5230742	1.7e-05	MCF7	0	0.04	0.113488
863	DB00991	oxaprozin	0.0003	MCF7	0	0.02	0.0794788
864	DB02424	geldanamycin	1e-06	MCF7	0	0.06	0.137491
865		quinostatin	1e-05	MCF7	0	0.02	0.0794788
866		ikarugamycin	2e-06	MCF7	0	0.04	0.113488
868		5182598	2.5e-05	MCF7	0	0.04	0.113488
869	DB08059	wortmannin	1e-06	MCF7	0	0.04	0.113488
870	DB06816	pyrvinium	1.25e-06	MCF7	0	0.05	0.125308
871		ionomycin	2e-06	MCF7	0	0.06	0.137491
873		trichostatin A	1e-06	MCF7	0	0.06	0.137491
874		depudecin	1e-06	MCF7	0	0.03	0.09844
881		docosahexaenoic acid ethyl ester	0.0001	MCF7	0	0.01	0.05365
885		5186223	1.2e-05	MCF7	0	0.02	0.0794788
887		celastrol	2.5e-06	MCF7	0	0.02	0.0794788
889		5286656	5e-05	MCF7	0	0.03	0.09844
890		5149715	1e-05	MCF7	0	0.06	0.137491
892		5162773	7e-06	MCF7	0	0.01	0.05365
893		pararosaniline	1e-05	MCF7	0	0.02	0.0794788
896		5152487	1e-05	MCF7	0	0.01	0.05365
898		5213008	1.8e-05	MCF7	0	0.01	0.05365
900		5186324	2e-06	MCF7	0	0.02	0.0794788
901		5114445	1e-05	MCF7	0	0.04	0.113488
903		5151277	1.4e-05	MCF7	0	0.02	0.0794788
904		5109870	2.5e-05	MCF7	0	0	0
905	DB00257	clotrimazole	5e-05	MCF7	0	0.01	0.05365
908		5140203	1.5e-05	MCF7	0	0.01	0.05365
909		HC toxin	1e-07	MCF7	0	0.02	0.0794788
910	DB00831	trifluoperazine	1e-05	MCF7	0	0	0
911	DB08059	wortmannin	1e-08	MCF7	0	0.05	0.125308
913	DB02587	colforsin	5e-05	MCF7	0	0.01	0.05365
914		rottlerin	1e-05	MCF7	0	0.03	0.09844
915	DB00273	topiramate	3e-06	MCF7	0	0.02	0.0794788
916	DB05134	tanespimycin	1e-06	MCF7	0	0.05	0.125308
917	DB04216	quercetin	1e-06	MCF7	0	0.02	0.0794788
918		ikarugamycin	2e-06	MCF7	0	0.02	0.0794788
919	DB00564	carbamazepine	1e-07	MCF7	0	0.05	0.125308
920	DB01262	decitabine	1e-07	MCF7	0	0.04	0.113488
921	DB00877	sirolimus	1e-07	MCF7	0	0.06	0.137491
941		rottlerin	1e-05	MCF7	0	0.01	0.05365
942	DB00457	prazosin	1e-05	MCF7	0	0.03	0.09844
944		5252917	1.4e-05	MCF7	0	0.01	0.05365
947	DB05134	tanespimycin	1e-06	MCF7	0	0.02	0.0794788
948		Y-27632	3e-06	MCF7	0	0.01	0.05365
949		5255229	1.3e-05	MCF7	0	0.01	0.05365
950		5211181	1.2e-05	MCF7	0	0	0
952	DB00564	carbamazepine	1e-07	MCF7	0	0	0
953		monorden	1e-07	MCF7	0	0	0
954		blebbistatin	1.7e-05	MCF7	0	0.01	0.05365
955		5248896	1.1e-05	MCF7	0	0	0
956		5224221	1.2e-05	MCF7	0	0.02	0.0794788
958	DB02709	resveratrol	1e-05	MCF7	0	0.03	0.09844
959	DB13242	bucladesine	2e-06	MCF7	0	0	0
960		5279552	2.2e-05	MCF7	0	0.03	0.09844
961		5253409	1.7e-05	MCF7	0	0.03	0.09844
965	DB01023	felodipine	1e-05	MCF7	0	0.01	0.05365
966	DB00755	tretinoin	1e-06	MCF7	0	0.02	0.0794788
970		5230742	1.7e-05	MCF7	0	0	0
971	DB00991	oxaprozin	0.0003	MCF7	0	0.03	0.09844
972	DB02424	geldanamycin	1e-06	MCF7	0	0.02	0.0794788
973		quinostatin	1e-05	MCF7	0	0.02	0.0794788
976		5182598	2.5e-05	MCF7	0	0.01	0.05365
977	DB08059	wortmannin	1e-06	MCF7	0	0	0
978	DB06816	pyrvinium	1.25e-06	MCF7	0	0.02	0.0794788
981		trichostatin A	1e-06	MCF7	0	0.07	0.147394
982		depudecin	1e-06	MCF7	0	0.03	0.09844
983	DB00502	haloperidol	1e-05	MCF7	0	0.04	0.113488
984	DB00945	acetylsalicylic acid	0.0001	MCF7	0	0.02	0.0794788
985	DB00947	fulvestrant	1e-06	MCF7	0	0.02	0.0794788
986	DB05134	tanespimycin	1e-06	MCF7	0	0.05	0.125308
987	DB00877	sirolimus	1e-07	MCF7	0	0.07	0.147394
988	DB00783	estradiol	1e-07	MCF7	0	0	0
989	DB00313	valproic acid	0.001	MCF7	0	0.01	0.05365
990		alpha-estradiol	1e-08	MCF7	0	0	0
991	DB00755	tretinoin	1e-06	MCF7	0	0.02	0.0794788
992		trichostatin A	1e-07	MCF7	0	0.04	0.113488
993	DB12442	alvespimycin	1e-07	MCF7	0	0.02	0.0794788
994	DB00313	valproic acid	0.0002	MCF7	0	0.02	0.0794788
995	DB00433	prochlorperazine	1e-05	MCF7	0	0.01	0.05365
996	DB02656	LY-294002	1e-07	MCF7	0	0.03	0.09844
997	DB00477	chlorpromazine	1e-06	MCF7	0	0.01	0.05365
998	DB05134	tanespimycin	1e-06	MCF7	0	0.01	0.05365
1000	DB02546	vorinostat	1e-05	MCF7	0	0.02	0.0794788
1001	DB00877	sirolimus	1e-07	MCF7	0	0	0
1002	DB00313	valproic acid	5e-05	MCF7	0	0.04	0.113488
1003	DB00179	nordihydroguaiaretic acid	1e-06	MCF7	0	0.01	0.05365
1004	DB00831	trifluoperazine	1e-05	MCF7	0	0.03	0.09844
1005	DB05134	tanespimycin	1e-06	MCF7	0	0.02	0.0794788
1006	DB05134	tanespimycin	1e-06	MCF7	0	0.01	0.05365
1007	DB02656	LY-294002	1e-05	MCF7	0	0.02	0.0794788
1008	DB02424	geldanamycin	1e-06	MCF7	0	0	0
1009	DB00363	clozapine	1e-05	MCF7	0	0.01	0.05365
1010	DB00679	thioridazine	1e-05	MCF7	0	0	0
1011		15-delta prostaglandin J2	1e-05	MCF7	0	0	0
1012	DB00197	troglitazone	1e-05	MCF7	0	0.02	0.0794788
1013	DB00412	rosiglitazone	1e-05	MCF7	0	0	0
1014		trichostatin A	1e-06	MCF7	0	0	0
1015	DB01645	genistein	1e-05	MCF7	0	0.02	0.0794788
1016	DB02656	LY-294002	1e-05	MCF7	0	0.01	0.05365
1017	DB00623	fluphenazine	1e-05	MCF7	0	0.02	0.0794788
1019	DB02656	LY-294002	1e-05	MCF7	0	0.01	0.05365
1020	DB00313	valproic acid	0.0005	MCF7	0	0.02	0.0794788
1021	DB00783	estradiol	1e-08	MCF7	0	0.08	0.157369
1022	DB00877	sirolimus	1e-07	MCF7	0	0.04	0.113488
1023	DB08059	wortmannin	1e-08	MCF7	0	0.06	0.137491
1024	DB00502	haloperidol	1e-05	MCF7	0	0.02	0.0794788
1041	DB00502	haloperidol	1e-05	MCF7	0	0	0
1042	DB00945	acetylsalicylic acid	0.0001	MCF7	0	0.01	0.05365
1043	DB00947	fulvestrant	1e-06	MCF7	0	0	0
1044	DB05134	tanespimycin	1e-06	MCF7	0	0	0
1045	DB00877	sirolimus	1e-07	MCF7	0	0	0
1047	DB00313	valproic acid	0.001	MCF7	0	0.01	0.05365
1048		alpha-estradiol	1e-08	MCF7	0	0	0
1049	DB00755	tretinoin	1e-06	MCF7	0	0	0
1050		trichostatin A	1e-07	MCF7	0	0.01	0.05365
1051	DB12442	alvespimycin	1e-07	MCF7	0	0	0
1053	DB00433	prochlorperazine	1e-05	MCF7	0	0	0
1054	DB02656	LY-294002	1e-07	MCF7	0	0	0
1055	DB00477	chlorpromazine	1e-06	MCF7	0	0	0
1056	DB05134	tanespimycin	1e-06	MCF7	0	0	0
1057		monorden	1e-07	MCF7	0	0.01	0.05365
1058	DB02546	vorinostat	1e-05	MCF7	0	0.01	0.05365
1059	DB00877	sirolimus	1e-07	MCF7	0	0	0
1060	DB00313	valproic acid	5e-05	MCF7	0	0.01	0.05365
1061	DB00179	nordihydroguaiaretic acid	1e-06	MCF7	0	0.01	0.05365
1063	DB05134	tanespimycin	1e-06	MCF7	0	0	0
1064	DB05134	tanespimycin	1e-06	MCF7	0	0	0
1065	DB02656	LY-294002	1e-05	MCF7	0	0	0
1066	DB02424	geldanamycin	1e-06	MCF7	0	0.01	0.05365
1068	DB00679	thioridazine	1e-05	MCF7	0	0	0
1069		15-delta prostaglandin J2	1e-05	MCF7	0	0.02	0.0794788
1070	DB00197	troglitazone	1e-05	MCF7	0	0	0
1071	DB00412	rosiglitazone	1e-05	MCF7	0	0	0
1072		trichostatin A	1e-06	MCF7	0	0.03	0.09844
1073	DB01645	genistein	1e-05	MCF7	0	0.01	0.05365
1074	DB02656	LY-294002	1e-05	MCF7	0	0.01	0.05365
1075	DB00623	fluphenazine	1e-05	MCF7	0	0	0
1076	DB00947	fulvestrant	1e-08	MCF7	0	0	0
1077	DB02656	LY-294002	1e-05	MCF7	0	0	0
1078	DB00313	valproic acid	0.0005	MCF7	0	0.01	0.05365
1079	DB00783	estradiol	1e-08	MCF7	0	0	0
1080	DB00877	sirolimus	1e-07	MCF7	0	0.01	0.05365
1081	DB08059	wortmannin	1e-08	MCF7	0	0.01	0.05365
1082	DB00502	haloperidol	1e-05	MCF7	0	0.03	0.09844
1101		(-)-catechin	1.1e-05	MCF7	0	0	0
1103	DB13318	demecolcine	1.17e-05	MCF7	0	0.01	0.05365
1105	DB11430	monensin	1.09e-05	MCF7	0	0.01	0.05365
1108		12,13-EODE	2e-07	MCF7	0	0	0
1109		3-hydroxy-DL-kynurenine	9.2e-06	MCF7	0	0	0
1112		trichostatin A	1e-07	MCF7	0	0	0
1113	DB00254	doxycycline	1.44e-05	MCF7	0	0	0
1114		tyrphostin AG-825	2.52e-05	MCF7	0	0	0
1115		phenanthridinone	5.12e-05	MCF7	0	0	0
1119	DB01392	yohimbine	2.29e-05	MCF7	0	0	0
1121		DL-PPMP	2e-06	MCF7	0	0	0
1122		cytochalasin B	2.08e-05	MCF7	0	0	0
1132		BW-B70C	3.16e-05	MCF7	0	0.01	0.05365
1135	DB01017	minocycline	1.05e-05	MCF7	0	0	0
1138	DB00692	phentolamine	1.15e-05	MCF7	0	0	0
1140		MG-132	2.1e-05	MCF7	0	0	0
1141		tyrphostin AG-1478	3.16e-05	MCF7	0	0.01	0.05365
1144	DB00502	haloperidol	1e-05	HL60	0	0.01	0.05365
1145	DB00945	acetylsalicylic acid	0.0001	HL60	0	0.02	0.0794788
1146	DB00947	fulvestrant	1e-06	HL60	0	0	0
1147	DB05134	tanespimycin	1e-06	HL60	0	0.01	0.05365
1148	DB00877	sirolimus	1e-07	HL60	0	0	0
1149	DB00783	estradiol	1e-07	HL60	0	0.04	0.113488
1150	DB00313	valproic acid	0.001	HL60	0	0.05	0.125308
1151		alpha-estradiol	1e-08	HL60	0	0.01	0.05365
1152	DB00755	tretinoin	1e-06	HL60	0	0.03	0.09844
1153		trichostatin A	1e-07	HL60	0	0.02	0.0794788
1154	DB12442	alvespimycin	1e-07	HL60	0	0	0
1155	DB00313	valproic acid	0.0002	HL60	0	0.04	0.113488
1156	DB00433	prochlorperazine	1e-05	HL60	0	0	0
1157	DB02656	LY-294002	1e-07	HL60	0	0.01	0.05365
1158	DB00477	chlorpromazine	1e-06	HL60	0	0.01	0.05365
1159	DB05134	tanespimycin	1e-06	HL60	0	0	0
1160		monorden	1e-07	HL60	0	0.01	0.05365
1161	DB02546	vorinostat	1e-05	HL60	0	0.03	0.09844
1162	DB00877	sirolimus	1e-07	HL60	0	0.02	0.0794788
1163	DB00313	valproic acid	5e-05	HL60	0	0	0
1164	DB00179	nordihydroguaiaretic acid	1e-06	HL60	0	0	0
1165	DB00831	trifluoperazine	1e-05	HL60	0	0.01	0.05365
1166	DB05134	tanespimycin	1e-06	HL60	0	0.02	0.0794788
1168	DB02656	LY-294002	1e-05	HL60	0	0.04	0.113488
1169	DB02424	geldanamycin	1e-06	HL60	0	0.02	0.0794788
1170	DB00363	clozapine	1e-05	HL60	0	0.03	0.09844
1172		15-delta prostaglandin J2	1e-05	HL60	0	0.01	0.05365
1173	DB00197	troglitazone	1e-05	HL60	0	0.03	0.09844
1174	DB00412	rosiglitazone	1e-05	HL60	0	0.03	0.09844
1175		trichostatin A	1e-06	HL60	0	0.01	0.05365
1176	DB01645	genistein	1e-05	HL60	0	0.05	0.125308
1177	DB02656	LY-294002	1e-05	HL60	0	0.02	0.0794788
1178	DB00623	fluphenazine	1e-05	HL60	0	0.03	0.09844
1179	DB00947	fulvestrant	1e-08	HL60	0	0.04	0.113488
1180	DB02656	LY-294002	1e-05	HL60	0	0.01	0.05365
1182	DB00783	estradiol	1e-08	HL60	0	0.05	0.125308
1183	DB00877	sirolimus	1e-07	HL60	0	0.02	0.0794788
1184	DB08059	wortmannin	1e-08	HL60	0	0.05	0.125308
1203	DB00502	haloperidol	1e-05	PC3	0	0.06	0.137491
1204	DB00945	acetylsalicylic acid	0.0001	PC3	0	0.01	0.05365
1205	DB00947	fulvestrant	1e-06	PC3	0	0.06	0.137491
1206	DB05134	tanespimycin	1e-06	PC3	0	0.03	0.09844
1210		alpha-estradiol	1e-08	PC3	0	0.05	0.125308
1212		trichostatin A	1e-07	PC3	0	0.06	0.137491
1213	DB12442	alvespimycin	1e-07	PC3	0	0.04	0.113488
1216	DB02656	LY-294002	1e-07	PC3	0	0.04	0.113488
1217	DB00477	chlorpromazine	1e-06	PC3	0	0.06	0.137491
1218	DB05134	tanespimycin	1e-06	PC3	0	0.05	0.125308
1219		monorden	1e-07	PC3	0	0.01	0.05365
1220	DB02546	vorinostat	1e-05	PC3	0	0.03	0.09844
1221	DB00877	sirolimus	1e-07	PC3	0	0.05	0.125308
1225	DB05134	tanespimycin	1e-06	PC3	0	0.02	0.0794788
1226	DB05134	tanespimycin	1e-06	PC3	0	0.06	0.137491
1227	DB02656	LY-294002	1e-05	PC3	0	0.01	0.05365
1228	DB02424	geldanamycin	1e-06	PC3	0	0.06	0.137491
1231		15-delta prostaglandin J2	1e-05	PC3	0	0.02	0.0794788
1232	DB00197	troglitazone	1e-05	PC3	0	0.05	0.125308
1233	DB00412	rosiglitazone	1e-05	PC3	0	0.03	0.09844
1235	DB01645	genistein	1e-05	PC3	0	0.07	0.147394
1238	DB00947	fulvestrant	1e-08	PC3	0	0.09	0.166566
1239	DB02656	LY-294002	1e-05	PC3	0	0.13	0.196579
1241	DB00783	estradiol	1e-08	PC3	0	0.1	0.175136
1243	DB08059	wortmannin	1e-08	PC3	0	0.09	0.166566
1263	DB01035	procainamide	1.48e-05	HL60	0	0.03	0.09844
1264		thioguanosine	1.26e-05	HL60	0	0	0
1265	DB01060	amoxicillin	1.1e-05	HL60	0	0.01	0.05365
1266	DB09022	benfluorex	1.04e-05	HL60	0	0	0
1267	DB13588	naftidrofuryl	8.4e-06	HL60	0	0	0
1268	DB11186	pentoxyverine	7.6e-06	HL60	0	0	0
1269	DB00882	clomifene	6.6e-06	HL60	0	0.01	0.05365
1270		zoxazolamine	2.38e-05	HL60	0	0.01	0.05365
1271		N6-methyladenosine	1.42e-05	HL60	0	0.01	0.05365
1272	DB01239	chlorprothixene	1.14e-05	HL60	0	0	0
1273	DB00567	cefalexin	1.1e-05	HL60	0	0	0
1274	DB01244	bepridil	1e-05	HL60	0	0.01	0.05365
1275	DB01393	bezafibrate	1.1e-05	HL60	0	0.04	0.113488
1276	DB04209	dequalinium chloride	7.6e-06	HL60	0	0	0
1278	DB00382	tacrine	1.58e-05	HL60	0	0.01	0.05365
1279	DB01018	guanfacine	1.42e-05	HL60	0	0.01	0.05365
1280	DB00867	ritodrine	1.24e-05	HL60	0	0.01	0.05365
1281	DB00514	dextromethorphan	1.08e-05	HL60	0	0	0
1282	DB00490	buspirone	9.4e-06	HL60	0	0	0
1284		trichostatin A	1e-07	HL60	0	0.04	0.113488
1285	DB01026	ketoconazole	7.6e-06	HL60	0	0.04	0.113488
1286	DB00433	prochlorperazine	6.6e-06	HL60	0	0.06	0.137491
1287	DB00612	bisoprolol	9e-06	HL60	0	0	0
1288	DB00875	flupentixol	7.8e-06	HL60	0	0	0
1289	DB00363	clozapine	1.22e-05	HL60	0	0.02	0.0794788
1290	DB00450	droperidol	1.06e-05	HL60	0	0.06	0.137491
1291	DB12319	benzbromarone	9.4e-06	HL60	0	0.01	0.05365
1292	DB13511	clebopride	8.2e-06	HL60	0	0	0
1293	DB02703	fusidic acid	7.4e-06	HL60	0	0.02	0.0794788
1294	DB04703	hesperidin	6.6e-06	HL60	0	0.03	0.09844
1295	DB00624	testosterone	1.16e-05	HL60	0	0	0
1296		androsterone	1.38e-05	HL60	0	0.01	0.05365
1297	DB13340	suloctidil	1.18e-05	HL60	0	0.01	0.05365
1298		coralyne	9.6e-06	HL60	0	0.03	0.09844
1299	DB00783	estradiol	1.46e-05	HL60	0	0.03	0.09844
1300		3-hydroxy-DL-kynurenine	1.78e-05	HL60	0	0.02	0.0794788
1301	DB01184	domperidone	7.4e-06	HL60	0	0	0
1302	DB01092	ouabain	5.4e-06	HL60	0	0.03	0.09844
1303	DB04365	arecoline	1.7e-05	HL60	0	0.05	0.125308
1304	DB07374	anisomycin	1.5e-05	HL60	0	0.04	0.113488
1305		carcinine	2.2e-05	HL60	0	0	0
1306		trichostatin A	1e-07	HL60	0	0.01	0.05365
1307	DB04652	corticosterone	1.16e-05	HL60	0	0.07	0.147394
1308		fusaric acid	2.24e-05	HL60	0	0	0
1310	DB00671	cefixime	8.8e-06	HL60	0	0.07	0.147394
1311	DB01783	calcium pantothenate	8e-06	HL60	0	0.01	0.05365
1312	DB00451	levothyroxine sodium	5.2e-06	HL60	0	0.02	0.0794788
1313		carbarsone	1.54e-05	HL60	0	0.03	0.09844
1315	DB00115	cyanocobalamin	3e-06	HL60	0	0.01	0.05365
1316		SR-95531	1.08e-05	HL60	0	0.01	0.05365
1317		lumicolchicine	1e-05	HL60	0	0.03	0.09844
1318	DB01578	metrizamide	5e-06	HL60	0	0.02	0.0794788
1319	DB01330	cefotetan	7e-06	HL60	0	0.02	0.0794788
1320	DB14476	dl-alpha tocopherol	9.2e-06	HL60	0	0.01	0.05365
1321	DB07352	apigenin	1.48e-05	HL60	0	0	0
1322		7-aminocephalosporanic acid	1.46e-05	HL60	0	0.02	0.0794788
1323	DB01140	cefadroxil	1.1e-05	HL60	0	0.02	0.0794788
1324	DB06743	ginkgolide A	9.8e-06	HL60	0	0	0
1325		lysergol	1.58e-05	HL60	0	0.05	0.125308
1326		N-acetylmuramic acid	1.36e-05	HL60	0	0.03	0.09844
1328		pepstatin	5.8e-06	HL60	0	0.01	0.05365
1329		N-acetyl-L-aspartic acid	2.28e-05	HL60	0	0.03	0.09844
1330		Chicago Sky Blue 6B	4e-06	HL60	0	0.04	0.113488
1331	DB00091	ciclosporin	3.4e-06	HL60	0	0	0
1332	DB00924	cyclobenzaprine	1.28e-05	HL60	0	0.05	0.125308
1335	DB00835	brompheniramine	9.2e-06	HL60	0	0.04	0.113488
1337	DB01602	bacampicillin	8e-06	HL60	0	0	0
1338	DB13510	buflomedil	1.16e-05	HL60	0	0.01	0.05365
1339		digitoxigenin	1.06e-05	HL60	0	0.01	0.05365
1340	DB00521	carteolol	1.22e-05	HL60	0	0.01	0.05365
1341	DB13092	meclocycline	5.8e-06	HL60	0	0.04	0.113488
1342	DB03467	naringenin	1.46e-05	HL60	0	0.02	0.0794788
1343	DB01087	primaquine	8.8e-06	HL60	0	0.05	0.125308
1344	DB00915	amantadine	9.6e-06	HL60	0	0.02	0.0794788
1345	DB12480	betulinic acid	8.8e-06	HL60	0	0.01	0.05365
1346	DB12029	chlorogenic acid	1.12e-05	HL60	0	0.02	0.0794788
1363	DB00704	naltrexone	9.6e-06	HL60	0	0.01	0.05365
1364	DB00358	mefloquine	9.6e-06	HL60	0	0	0
1365	DB00637	astemizole	8.8e-06	HL60	0	0	0
1366	DB00675	tamoxifen	7e-06	HL60	0	0.01	0.05365
1367	DB00602	ivermectin	4.6e-06	HL60	0	0.01	0.05365
1368	DB01119	diazoxide	1.74e-05	HL60	0	0.01	0.05365
1369	DB00822	disulfiram	1.34e-05	HL60	0	0.02	0.0794788
1370		atropine oxide	1.18e-05	HL60	0	0	0
1371	DB01114	chlorphenamine	1.02e-05	HL60	0	0	0
1372	DB08943	isoconazole	9.6e-06	HL60	0	0	0
1374	DB00699	nicergoline	8.2e-06	HL60	0	0.01	0.05365
1375	DB00483	gallamine triethiodide	4.4e-06	HL60	0	0.02	0.0794788
1376	DB01424	aminophenazone	1.72e-05	HL60	0	0	0
1377		acetylsalicylsalicylic acid	1.34e-05	HL60	0	0.01	0.05365
1378	DB04821	nomifensine	1.12e-05	HL60	0	0.03	0.09844
1379	DB00844	nalbuphine	1.02e-05	HL60	0	0.01	0.05365
1380	DB00421	spironolactone	9.6e-06	HL60	0	0.02	0.0794788
1381	DB00342	terfenadine	8.4e-06	HL60	0	0.02	0.0794788
1383	DB00994	neomycin	4.2e-06	HL60	0	0.03	0.09844
1385	DB06148	mianserin	1.32e-05	HL60	0	0.01	0.05365
1386		dizocilpine	1.18e-05	HL60	0	0.01	0.05365
1387	DB13327	picotamide	1.02e-05	HL60	0	0.02	0.0794788
1388	DB00670	pirenzepine	9.4e-06	HL60	0	0.01	0.05365
1389	DB00493	cefotaxime	8.4e-06	HL60	0	0.01	0.05365
1390	DB01622	thioproperazine	6.2e-06	HL60	0	0.03	0.09844
1391	DB11512	dihydrostreptomycin	2.8e-06	HL60	0	0.02	0.0794788
1392	DB00960	pindolol	1.62e-05	HL60	0	0.05	0.125308
1393	DB08313	nocodazole	1.32e-05	HL60	0	0.04	0.113488
1394	DB01418	acenocoumarol	1.14e-05	HL60	0	0.01	0.05365
1395	DB00620	triamcinolone	1.02e-05	HL60	0	0	0
1396	DB01234	dexamethasone	9.2e-06	HL60	0	0.01	0.05365
1397	DB00759	tetracycline	8.4e-06	HL60	0	0.05	0.125308
1398	DB00320	dihydroergotamine	3e-06	HL60	0	0	0
1399	DB00951	isoniazid	2.92e-05	HL60	0	0.01	0.05365
1400		trichostatin A	1e-07	HL60	0	0.02	0.0794788
1401	DB00302	tranexamic acid	2.54e-05	HL60	0	0.01	0.05365
1402		ampyrone	1.96e-05	HL60	0	0.21	0.254773
1403	DB00211	midodrine	1.38e-05	HL60	0	0.07	0.147394
1404	DB00863	ranitidine	1.14e-05	HL60	0	0.02	0.0794788
1405	DB00554	piroxicam	1.2e-05	HL60	0	0.05	0.125308
1406	DB01059	norfloxacin	1.26e-05	HL60	0	0	0
1407	DB00749	etodolac	1.4e-05	HL60	0	0	0
1409		etofylline	1.78e-05	HL60	0	0.01	0.05365
1410	DB00848	levamisole	1.66e-05	HL60	0	0.01	0.05365
1411	DB01041	thalidomide	1.54e-05	HL60	0	0	0
1412	DB03604	tiratricol	6.4e-06	HL60	0	0	0
1413	DB11156	pyrantel	1.12e-05	HL60	0	0	0
1414		antimycin A	7.2e-06	HL60	0	0.01	0.05365
1415		scopolamine N-oxide	1e-05	HL60	0	0.05	0.125308
1417	DB00752	tranylcypromine	2.36e-05	HL60	0	0.01	0.05365
1418	DB01626	pargyline	2.04e-05	HL60	0	0.01	0.05365
1419	DB13627	oxolinic acid	1.54e-05	HL60	0	0	0
1420	DB02266	flufenamic acid	1.42e-05	HL60	0	0.02	0.0794788
1421		trichostatin A	1e-07	HL60	0	0.03	0.09844
1422	DB08979	fenspiride	1.34e-05	HL60	0	0.02	0.0794788
1423	DB06694	xylometazoline	1.42e-05	HL60	0	0.01	0.05365
1425	DB13026	ornidazole	1.82e-05	HL60	0	0.03	0.09844
1426	DB01616	alverine	8.4e-06	HL60	0	0.02	0.0794788
1428	DB04743	nimesulide	1.3e-05	HL60	0	0	0
1429	DB08972	flumequine	1.54e-05	HL60	0	0.01	0.05365
1430	DB01241	gemfibrozil	1.6e-05	HL60	0	0	0
1431	DB00935	oxymetazoline	1.34e-05	HL60	0	0.01	0.05365
1432	DB00856	chlorphenesin	1.62e-05	HL60	0	0.02	0.0794788
1433	DB00593	ethosuximide	2.84e-05	HL60	0	0.03	0.09844
1435	DB00355	aztreonam	9.2e-06	HL60	0	0	0
1436		hydrastinine	1.64e-05	HL60	0	0.06	0.137491
1437	DB09216	tolfenamic acid	1.52e-05	HL60	0	0.02	0.0794788
1438		mefexamide	1.26e-05	HL60	0	0.02	0.0794788
1439	DB13407	nifenazone	1.3e-05	HL60	0	0	0
1440	DB13836	metampicillin	1.04e-05	HL60	0	0.01	0.05365
1441	DB06795	mafenide	1.8e-05	HL60	0	0.02	0.0794788
1443	DB01147	cloxacillin	8.8e-06	HL60	0	0.03	0.09844
1444	DB00806	pentoxifylline	1.44e-05	HL60	0	0.01	0.05365
1445	DB00939	meclofenamic acid	1.18e-05	HL60	0	0.02	0.0794788
1463	DB06147	sulfathiazole	1.56e-05	MCF7	0	0.06	0.137491
1464	DB00501	cimetidine	1.58e-05	MCF7	0	0.11	0.183484
1465	DB13179	troleandomycin	5e-06	MCF7	0	0.09	0.166566
1466	DB06711	naphazoline	1.62e-05	MCF7	0	0.08	0.157369
1468	DB00805	minaprine	1.08e-05	MCF7	0	0.04	0.113488
1469	DB00527	cinchocaine	1.16e-05	MCF7	0	0.11	0.183484
1470	DB00594	amiloride	1.32e-05	MCF7	0	0.05	0.125308
1471		trichostatin A	1e-07	MCF7	0	0.06	0.137491
1472	DB01235	levodopa	2.02e-05	MCF7	0	0.06	0.137491
1473	DB00366	doxylamine	1.02e-05	MCF7	0	0.04	0.113488
1474	DB00205	pyrimethamine	1.6e-05	MCF7	0	0.08	0.157369
1475	DB00208	ticlopidine	1.34e-05	MCF7	0	0.08	0.157369
1476	DB00892	oxybuprocaine	1.16e-05	MCF7	0	0.03	0.09844
1478	DB00635	prednisone	1.12e-05	MCF7	0	0.03	0.09844
1479		amprolium	1.26e-05	MCF7	0	0.05	0.125308
1480	DB00249	idoxuridine	1.12e-05	MCF7	0	0.08	0.157369
1481	DB00330	ethambutol	1.44e-05	MCF7	0	0.1	0.175136
1482	DB08960	hexamethonium bromide	1e-05	MCF7	0	0.05	0.125308
1483	DB00804	dicycloverine	1.16e-05	MCF7	0	0.05	0.125308
1485	DB08941	isoxsuprine	1.18e-05	MCF7	0	0.04	0.113488
1487	DB00999	hydrochlorothiazide	1.34e-05	MCF7	0	0.12	0.19013
1488	DB01197	captopril	1.72e-05	MCF7	0	0.07	0.147394
1489	DB01435	phenazone	2.12e-05	MCF7	0	0.07	0.147394
1490	DB00861	diflunisal	1.6e-05	MCF7	0	0.08	0.157369
1491	DB09088	amylocaine	1.48e-05	MCF7	0	0.05	0.125308
1492	DB01620	pheniramine	1.12e-05	MCF7	0	0.09	0.166566
1493	DB01193	acebutolol	1.08e-05	MCF7	0	0.08	0.157369
1494	DB13720	diphemanil metilsulfate	1.02e-05	MCF7	0	0.06	0.137491
1495	DB13726	sulfaguanidine	1.86e-05	MCF7	0	0.07	0.147394
1496	DB00350	minoxidil	1.92e-05	MCF7	0	0.1	0.175136
1497		4-hydroxyphenazone	1.96e-05	MCF7	0	0.06	0.137491
1498	DB06803	niclosamide	1.22e-05	MCF7	0	0.06	0.137491
1499	DB00281	lidocaine	1.48e-05	MCF7	0	0.05	0.125308
1500	DB00797	tolazoline	2.04e-05	MCF7	0	0.08	0.157369
1501	DB00525	tolnaftate	1.3e-05	MCF7	0	0.06	0.137491
1502	DB00662	trimethobenzamide	9.4e-06	MCF7	0	0.09	0.166566
1503	DB00916	metronidazole	2.34e-05	MCF7	0	0.08	0.157369
1504		khellin	1.54e-05	MCF7	0	0.07	0.147394
1505	DB00714	apomorphine	6.4e-06	MCF7	0	0.08	0.157369
1506	DB01183	naloxone	1.1e-05	MCF7	0	0.07	0.147394
1507	DB01200	bromocriptine	5.4e-06	MCF7	0	0.06	0.137491
1510	DB00199	erythromycin	5.4e-06	MCF7	0	0.08	0.157369
1511		cotinine	2.26e-05	MCF7	0	0.1	0.175136
1512	DB04832	zimeldine	9.8e-06	MCF7	0	0.09	0.166566
1513	DB00543	amoxapine	1.28e-05	MCF7	0	0.06	0.137491
1514	DB00524	metolazone	1.1e-05	MCF7	0	0.07	0.147394
1515		metanephrine	1.72e-05	MCF7	0	0.08	0.157369
1516	DB00408	loxapine	9e-06	MCF7	0	0.07	0.147394
1517	DB00975	dipyridamole	8e-06	MCF7	0	0.13	0.196579
1518	DB11442	oleandomycin	5e-06	MCF7	0	0.08	0.157369
1519	DB01010	edrophonium chloride	1.98e-05	MCF7	0	0.13	0.196579
1520		azacyclonol	1.5e-05	MCF7	0	0.11	0.183484
1522	DB00537	ciprofloxacin	1.08e-05	MCF7	0	0.08	0.157369
1523	DB11622	dehydrocholic acid	9.6e-06	MCF7	0	0.1	0.175136
1524	DB00557	hydroxyzine	9e-06	MCF7	0	0.06	0.137491
1525	DB00878	chlorhexidine	8e-06	MCF7	0	0.09	0.166566
1526	DB13456	midecamycin	5e-06	MCF7	0	0.08	0.157369
1528	DB00993	azathioprine	1.44e-05	MCF7	0	0.09	0.166566
1529	DB00927	famotidine	1.18e-05	MCF7	0	0.07	0.147394
1530	DB00415	ampicillin	1e-05	MCF7	0	0.07	0.147394
1531	DB01094	hesperetin	1.32e-05	MCF7	0	0.05	0.125308
1532	DB00343	diltiazem	8.8e-06	MCF7	0	0.08	0.157369
1533	DB00836	loperamide	7.8e-06	MCF7	0	0.1	0.175136
1534	DB01321	josamycin	4.8e-06	MCF7	0	0.06	0.137491
1535		trichostatin A	1e-07	MCF7	0	0.12	0.19013
1536	DB00181	baclofen	1.88e-05	MCF7	0	0.07	0.147394
1539	DB00502	haloperidol	1.06e-05	MCF7	0	0.08	0.157369
1540	DB00850	perphenazine	1e-05	MCF7	0	0.12	0.19013
1541	DB09093	chlortetracycline	7.8e-06	MCF7	0	0.13	0.196579
1542	DB01229	paclitaxel	4.6e-06	MCF7	0	0.14	0.203382
1543	DB00787	aciclovir	1.78e-05	MCF7	0	0.08	0.157369
1544	DB00629	guanabenz	1.38e-05	MCF7	0	0.07	0.147394
1545	DB00589	lisuride	1.18e-05	MCF7	0	0.12	0.19013
1546	DB01016	glibenclamide	8e-06	HL60	0	0.22	0.264017
1547	DB00518	albendazole	1.5e-05	HL60	0	0	0
1548	DB00755	tretinoin	1.34e-05	HL60	0	0.03	0.09844
1549	DB00257	clotrimazole	1.16e-05	HL60	0	0.04	0.113488
1550	DB00598	labetalol	1.1e-05	HL60	0	0	0
1551	DB01062	oxybutynin	1.02e-05	HL60	0	0.02	0.0794788
1552	DB09084	benzydamine	1.16e-05	HL60	0	0.02	0.0794788
1553	DB00595	oxytetracycline	8e-06	HL60	0	0.01	0.05365
1554	DB01170	guanethidine	1.34e-05	HL60	0	0.01	0.05365
1555	DB00575	clonidine	1.5e-05	HL60	0	0.01	0.05365
1556	DB08799	antazoline	1.32e-05	HL60	0	0.01	0.05365
1557	DB12131	vinpocetine	1.14e-05	HL60	0	0.01	0.05365
1558	DB00568	cinnarizine	1.08e-05	HL60	0	0	0
1559		spiperone	1.02e-05	HL60	0	0.02	0.0794788
1560	DB13790	fipexide	9.4e-06	HL60	0	0	0
1561		trichostatin A	1e-07	HL60	0	0.01	0.05365
1562	DB01100	pimozide	8.6e-06	HL60	0	0.01	0.05365
1563	DB01103	mepacrine	7.8e-06	HL60	0	0.01	0.05365
1564	DB01156	bupropion	1.44e-05	HL60	0	0.03	0.09844
1565	DB00903	etacrynic acid	1.32e-05	HL60	0	0.03	0.09844
1566	DB01242	clomipramine	1.14e-05	HL60	0	0.01	0.05365
1567	DB00959	methylprednisolone	1.06e-05	HL60	0	0	0
1568	DB06691	mepyramine	1e-05	HL60	0	0.05	0.125308
1569	DB00834	mifepristone	9.4e-06	HL60	0	0.03	0.09844
1570	DB00613	amodiaquine	8.6e-06	HL60	0	0.02	0.0794788
1571	DB00866	alprenolol	1.4e-05	HL60	0	0.01	0.05365
1572	DB01058	praziquantel	1.28e-05	HL60	0	0.02	0.0794788
1573	DB08980	fendiline	1.14e-05	HL60	0	0	0
1574	DB01138	sulfinpyrazone	9.8e-06	HL60	0	0	0
1576	DB12554	mebeverine	8.6e-06	HL60	0	0	0
1577	DB00623	fluphenazine	7.8e-06	HL60	0	0.02	0.0794788
1578	DB01082	streptomycin	2.8e-06	HL60	0	0	0
1579		tremorine	1.5e-05	HL60	0	0	0
1580	DB00695	furosemide	1.2e-05	HL60	0	0.01	0.05365
1581	DB00310	chlortalidone	1.18e-05	HL60	0	0	0
1582	DB01408	bambuterol	1e-05	HL60	0	0.02	0.0794788
1583	DB00920	ketotifen	9.4e-06	HL60	0	0	0
1585	DB00871	terbutaline	7.2e-06	HL60	0	0.01	0.05365
1586	DB00346	alfuzosin	9.4e-06	HL60	0	0.01	0.05365
1587	DB01297	practolol	1.5e-05	HL60	0	0.02	0.0794788
1588	DB04819	methapyrilene	1.34e-05	HL60	0	0.01	0.05365
1589	DB00841	dobutamine	1.18e-05	HL60	0	0.01	0.05365
1590	DB00443	betamethasone	1.02e-05	HL60	0	0.02	0.0794788
1591	DB04840	debrisoquine	9e-06	HL60	0	0	0
1592	DB00195	betaxolol	1.16e-05	HL60	0	0.01	0.05365
1593	DB12465	ketanserin	7e-06	HL60	0	0.02	0.0794788
1594	DB00672	chlorpropamide	1.44e-05	HL60	0	0.02	0.0794788
1595	DB00495	zidovudine	1.5e-05	HL60	0	0.02	0.0794788
1596	DB01151	desipramine	1.32e-05	HL60	0	0	0
1597	DB00467	enoxacin	1.24e-05	HL60	0	0	0
1598	DB01394	colchicine	1e-05	HL60	0	0	0
1599	DB00563	methotrexate	8.8e-06	HL60	0	0.03	0.09844
1600	DB00622	nicardipine	7.8e-06	HL60	0	0	0
1601		hemicholinium	7e-06	HL60	0	0	0
1602	DB00397	phenylpropanolamine	2.14e-05	HL60	0	0	0
1603	DB00263	sulfafurazole	1.5e-05	HL60	0	0	0
1604	DB04017	clorgiline	1.3e-05	HL60	0	0.01	0.05365
1605	DB13792	clopamide	1.16e-05	HL60	0	0.09	0.166566
1606	DB13520	metergoline	1e-05	HL60	0	0.01	0.05365
1607	DB00353	methylergometrine	8.8e-06	HL60	0	0	0
1608	DB01599	probucol	7.8e-06	HL60	0	0.02	0.0794788
1609	DB01172	kanamycin	6.8e-06	HL60	0	0.02	0.0794788
1610	DB00126	ascorbic acid	2.24e-05	HL60	0	0	0
1611		zaprinast	1.48e-05	HL60	0	0.02	0.0794788
1612		trichostatin A	1e-07	HL60	0	0	0
1613	DB01407	clenbuterol	1.28e-05	HL60	0	0	0
1614	DB14061	hycanthone	1.12e-05	HL60	0	0.03	0.09844
1615	DB01194	brinzolamide	1.04e-05	HL60	0	0	0
1616		metitepine	8.4e-06	HL60	0	0	0
1618	DB00479	amikacin	6.6e-06	HL60	0	0.01	0.05365
1619	DB00968	methyldopa	1.9e-05	HL60	0	0	0
1620	DB01178	chlormezanone	1.46e-05	HL60	0	0	0
1621	DB00934	maprotiline	1.28e-05	HL60	0	0.04	0.113488
1622	DB00131	adenosine phosphate	1.1e-05	HL60	0	0.02	0.0794788
1623	DB06742	ambroxol	9.6e-06	HL60	0	0.02	0.0794788
1624	DB00845	clofazimine	8.4e-06	HL60	0	0	0
1625	DB03701	vanoxerine	7.6e-06	HL60	0	0	0
1626	DB00773	etoposide	6.8e-06	HL60	0	0.01	0.05365
1627	DB01329	cefoperazone	5.8e-06	HL60	0	0.01	0.05365
1628	DB00502	haloperidol	1e-05	MCF7	0	0.02	0.0794788
1629	DB00945	acetylsalicylic acid	0.0001	MCF7	0	0.02	0.0794788
1630	DB00947	fulvestrant	1e-06	MCF7	0	0.03	0.09844
1631	DB05134	tanespimycin	1e-06	MCF7	0	0.01	0.05365
1632	DB00877	sirolimus	1e-07	MCF7	0	0	0
1633	DB00783	estradiol	1e-07	MCF7	0	0	0
1634	DB00313	valproic acid	0.001	MCF7	0	0.04	0.113488
1635		alpha-estradiol	1e-08	MCF7	0	0.03	0.09844
1636	DB00755	tretinoin	1e-06	MCF7	0	0	0
1637		trichostatin A	1e-07	MCF7	0	0.04	0.113488
1638	DB12442	alvespimycin	1e-07	MCF7	0	0.02	0.0794788
1639	DB00313	valproic acid	0.0002	MCF7	0	0	0
1640	DB00433	prochlorperazine	1e-05	MCF7	0	0.05	0.125308
1641	DB02656	LY-294002	1e-07	MCF7	0	0	0
1642	DB00477	chlorpromazine	1e-06	MCF7	0	0	0
1643	DB05134	tanespimycin	1e-06	MCF7	0	0	0
1644		monorden	1e-07	MCF7	0	0	0
1645	DB02546	vorinostat	1e-05	MCF7	0	0.04	0.113488
1646	DB00877	sirolimus	1e-07	MCF7	0	0	0
1647	DB00313	valproic acid	5e-05	MCF7	0	0.02	0.0794788
1648	DB00179	nordihydroguaiaretic acid	1e-06	MCF7	0	0.02	0.0794788
1649	DB00831	trifluoperazine	1e-05	MCF7	0	0.01	0.05365
1650	DB05134	tanespimycin	1e-06	MCF7	0	0.03	0.09844
1651	DB05134	tanespimycin	1e-06	MCF7	0	0	0
1652	DB02656	LY-294002	1e-05	MCF7	0	0.02	0.0794788
1653	DB02424	geldanamycin	1e-06	MCF7	0	0.01	0.05365
1654	DB00363	clozapine	1e-05	MCF7	0	0.02	0.0794788
1655	DB00679	thioridazine	1e-05	MCF7	0	0.02	0.0794788
1656		15-delta prostaglandin J2	1e-05	MCF7	0	0.03	0.09844
1657	DB00197	troglitazone	1e-05	MCF7	0	0.02	0.0794788
1658	DB00412	rosiglitazone	1e-05	MCF7	0	0.02	0.0794788
1659		trichostatin A	1e-06	MCF7	0	0.08	0.157369
1660	DB01645	genistein	1e-05	MCF7	0	0.01	0.05365
1661	DB02656	LY-294002	1e-05	MCF7	0	0	0
1662	DB00623	fluphenazine	1e-05	MCF7	0	0	0
1663	DB00947	fulvestrant	1e-08	MCF7	0	0.02	0.0794788
1664	DB02656	LY-294002	1e-05	MCF7	0	0.03	0.09844
1665	DB00313	valproic acid	0.0005	MCF7	0	0.07	0.147394
1666	DB00783	estradiol	1e-08	MCF7	0	0.06	0.137491
1667	DB00877	sirolimus	1e-07	MCF7	0	0.09	0.166566
1668	DB08059	wortmannin	1e-08	MCF7	0	0.06	0.137491
1669	DB00502	haloperidol	1e-05	MCF7	0	0.02	0.0794788
1670	DB01667	8-azaguanine	2.62e-05	MCF7	0	0.02	0.0794788
1671	DB13284	meticrane	1.46e-05	MCF7	0	0.01	0.05365
1672		trichostatin A	1e-07	MCF7	0	0.03	0.09844
1674	DB00721	procaine	1.46e-05	MCF7	0	0.02	0.0794788
1675	DB11473	metrifonate	1.56e-05	MCF7	0	0.03	0.09844
1676		morantel	1.08e-05	MCF7	0	0.01	0.05365
1677		todralazine	1.48e-05	MCF7	0	0.01	0.05365
1678	DB11100	allantoin	2.52e-05	MCF7	0	0.02	0.0794788
1679	DB00868	benzonatate	6.6e-06	MCF7	0	0.01	0.05365
1680	DB09357	dexpanthenol	1.94e-05	MCF7	0	0.01	0.05365
1681	DB08991	epirizole	1.7e-05	MCF7	0	0.02	0.0794788
1682	DB09205	moxisylyte	1.26e-05	MCF7	0	0.01	0.05365
1683	DB00564	carbamazepine	1.7e-05	MCF7	0	0.03	0.09844
1684	DB11181	homatropine	1.12e-05	MCF7	0	0.03	0.09844
1685	DB00458	imipramine	1.26e-05	MCF7	0	0.01	0.05365
1686	DB00819	acetazolamide	1.8e-05	MCF7	0	0	0
1687	DB00774	hydroflumethiazide	1.2e-05	MCF7	0	0.01	0.05365
1688	DB00359	sulfadiazine	1.6e-05	MCF7	0	0.01	0.05365
1689	DB00651	diprophylline	1.58e-05	MCF7	0	0.04	0.113488
1690	DB00272	betazole	2.7e-05	MCF7	0	0.04	0.113488
1691	DB00508	triflupromazine	1.02e-05	MCF7	0	0.02	0.0794788
1692	DB01115	nifedipine	1.16e-05	MCF7	0	0.02	0.0794788
1693	DB00605	sulindac	1.12e-05	MCF7	0	0.03	0.09844
1694	DB00331	metformin	2.42e-05	MCF7	0	0.06	0.137491
1695	DB00634	sulfacetamide	1.58e-05	MCF7	0	0	0
1696	DB09371	noretynodrel	1.34e-05	MCF7	0	0.02	0.0794788
1697	DB00384	triamterene	1.58e-05	MCF7	0	0.01	0.05365
1698	DB08942	isoxicam	1.2e-05	MCF7	0	0.05	0.125308
1699	DB00784	mefenamic acid	1.66e-05	MCF7	0	0	0
1700	DB00477	chlorpromazine	1.12e-05	MCF7	0	0.02	0.0794788
1702	DB00732	atracurium besilate	3.2e-06	MCF7	0	0.03	0.09844
1703	DB13574	heptaminol	2.2e-05	MCF7	0	0.06	0.137491
1704	DB08621	thiamphenicol	1.12e-05	MCF7	0	0.01	0.05365
1706	DB00788	naproxen	1.74e-05	MCF7	0	0.05	0.125308
1707	DB00414	acetohexamide	1.24e-05	MCF7	0	0.06	0.137491
1708	DB01075	diphenhydramine	1.38e-05	MCF7	0	0.08	0.157369
1710	DB09210	piracetam	2.82e-05	HL60	0	0.02	0.0794788
1711	DB09282	molsidomine	1.66e-05	HL60	0	0.01	0.05365
1713	DB09167	dosulepin	1.2e-05	HL60	0	0.01	0.05365
1715	DB02709	resveratrol	1.76e-05	HL60	0	0.01	0.05365
1716	DB01222	budesonide	9.2e-06	HL60	0	0.02	0.0794788
1717	DB08814	triflusal	1.62e-05	HL60	0	0	0
1718	DB00498	phenindione	1.8e-05	HL60	0	0.01	0.05365
1719	DB00608	chloroquine	7.8e-06	HL60	0	0.01	0.05365
1720	DB01120	gliclazide	1.24e-05	HL60	0	0	0
1721	DB00438	ceftazidime	6.2e-06	HL60	0	0.01	0.05365
1722	DB01182	propafenone	1.06e-05	HL60	0	0.01	0.05365
1723	DB12401	bromperidol	9.6e-06	HL60	0	0.02	0.0794788
1724	DB01598	imipenem	1.34e-05	HL60	0	0	0
1725	DB00933	mesoridazine	7.4e-06	HL60	0	0.02	0.0794788
1726	DB11582	thiocolchicoside	7e-06	HL60	0	0.01	0.05365
1727	DB09069	trimetazidine	1.18e-05	HL60	0	0.02	0.0794788
1728		Prestwick-559	8.2e-06	HL60	0	0.03	0.09844
1729	DB06704	iobenguane	1.08e-05	HL60	0	0	0
1730	DB08989	etamivan	1.8e-05	HL60	0	0.09	0.166566
1731	DB01176	cyclizine	1.32e-05	HL60	0	0.03	0.09844
1732		trichostatin A	1e-07	HL60	0	0.02	0.0794788
1733	DB00795	sulfasalazine	1e-05	HL60	0	0.02	0.0794788
1734		Trolox C	1.6e-05	HL60	0	0.04	0.113488
1735	DB11389	clorsulon	1.06e-05	HL60	0	0.06	0.137491
1736	DB13063	parthenolide	1.62e-05	HL60	0	0.03	0.09844
1737	DB04825	prenylamine	9.6e-06	HL60	0	0.01	0.05365
1738	DB01199	tubocurarine chloride	5.2e-06	HL60	0	0.01	0.05365
1739	DB09085	tetracaine	1.32e-05	HL60	0	0.03	0.09844
1740		hydrastine hydrochloride	9.6e-06	HL60	0	0.03	0.09844
1741		laudanosine	1.12e-05	HL60	0	0.01	0.05365
1743		10-methoxyharmalan	1.86e-05	HL60	0	0	0
1744	DB00152	thiamine	1.18e-05	HL60	0	0.01	0.05365
1746	DB00764	mometasone	7.6e-06	HL60	0	0.02	0.0794788
1748		raubasine	1.02e-05	HL60	0	0.01	0.05365
1750		harmol	1.58e-05	HL60	0	0.04	0.113488
1751	DB04284	stachydrine	2.22e-05	HL60	0	0.02	0.0794788
1752	DB00449	dipivefrine	1.04e-05	HL60	0	0.05	0.125308
1753	DB06174	noscapine	9.6e-06	HL60	0	0.03	0.09844
1754		tomatidine	9.6e-06	HL60	0	0.07	0.147394
1755	DB01113	papaverine	1.06e-05	HL60	0	0.04	0.113488
1756		tetrahydroalstonine	1.14e-05	HL60	0	0.01	0.05365
1757		monocrotaline	1.22e-05	HL60	0	0	0
1758		harmine	1.6e-05	HL60	0	0	0
1759	DB00165	pyridoxine	1.94e-05	HL60	0	0	0
1761		syrosingopine	6e-06	HL60	0	0	0
1762	DB00851	dacarbazine	2.2e-05	HL60	0	0	0
1763	DB01392	yohimbine	1.02e-05	HL60	0	0.01	0.05365
1764		piperlongumine	1.26e-05	HL60	0	0	0
1765		ellipticine	1.62e-05	HL60	0	0.01	0.05365
1766	DB09028	cytisine	2.1e-05	HL60	0	0.02	0.0794788
1767	DB00140	riboflavin	1.06e-05	HL60	0	0	0
1768	DB00572	atropine	5.8e-06	HL60	0	0.01	0.05365
1769	DB00332	ipratropium bromide	9.8e-06	HL60	0	0	0
1771		calycanthine	1.16e-05	HL60	0	0.03	0.09844
1772		hydrocotarnine	1.32e-05	HL60	0	0	0
1773		1,4-chrysenequinone	1.54e-05	HL60	0	0.01	0.05365
1774		pseudopelletierine	2.1e-05	HL60	0	0.07	0.147394
1776	DB00981	physostigmine	6.2e-06	HL60	0	0.06	0.137491
1777	DB01614	acepromazine	9e-06	HL60	0	0.04	0.113488
1778	DB04115	berberine	1.08e-05	HL60	0	0.01	0.05365
1779		convolamine	1.18e-05	HL60	0	0	0
1780		cinchonidine	1.36e-05	HL60	0	0	0
1781	DB00944	demecarium bromide	5.6e-06	HL60	0	0.06	0.137491
1782	DB11696	racecadotril	1.04e-05	HL60	0	0.07	0.147394
1783		epivincamine	1.12e-05	HL60	0	0.01	0.05365
1784		aconitine	6.2e-06	HL60	0	0.01	0.05365
1785		trichostatin A	1e-07	HL60	0	0.05	0.125308
1786		(+)-chelidonine	1.08e-05	HL60	0	0.01	0.05365
1787		isocorydine	1.18e-05	HL60	0	0.07	0.147394
1788	DB13793	vinburnine	1.36e-05	HL60	0	0.04	0.113488
1789		quipazine	9e-06	HL60	0	0.01	0.05365
1790	DB00158	folic acid	9e-06	HL60	0	0.01	0.05365
1791	DB01667	8-azaguanine	2.62e-05	PC3	0	0	0
1792	DB13284	meticrane	1.46e-05	PC3	0	0	0
1795	DB00446	chloramphenicol	1.24e-05	PC3	0	0	0
1797	DB11473	metrifonate	1.56e-05	PC3	0	0.04	0.113488
1798		morantel	1.08e-05	PC3	0	0.01	0.05365
1799		todralazine	1.48e-05	PC3	0	0.02	0.0794788
1800	DB11100	allantoin	2.52e-05	PC3	0	0.03	0.09844
1802	DB09357	dexpanthenol	1.94e-05	PC3	0	0.04	0.113488
1803	DB08991	epirizole	1.7e-05	PC3	0	0.06	0.137491
1804	DB09205	moxisylyte	1.26e-05	PC3	0	0	0
1805	DB00564	carbamazepine	1.7e-05	PC3	0	0.03	0.09844
1806	DB11181	homatropine	1.12e-05	PC3	0	0.02	0.0794788
1807	DB00458	imipramine	1.26e-05	PC3	0	0.03	0.09844
1808	DB00819	acetazolamide	1.8e-05	PC3	0	0.04	0.113488
1809	DB00774	hydroflumethiazide	1.2e-05	PC3	0	0.04	0.113488
1810	DB00359	sulfadiazine	1.6e-05	PC3	0	0.03	0.09844
1811	DB00651	diprophylline	1.58e-05	PC3	0	0.02	0.0794788
1812	DB00272	betazole	2.7e-05	PC3	0	0.07	0.147394
1814	DB01115	nifedipine	1.16e-05	PC3	0	0.03	0.09844
1815	DB00605	sulindac	1.12e-05	PC3	0	0.05	0.125308
1816	DB00331	metformin	2.42e-05	PC3	0	0.04	0.113488
1817	DB00634	sulfacetamide	1.58e-05	PC3	0	0.03	0.09844
1818	DB09371	noretynodrel	1.34e-05	PC3	0	0.05	0.125308
1819	DB00384	triamterene	1.58e-05	PC3	0	0.05	0.125308
1820	DB08942	isoxicam	1.2e-05	PC3	0	0.1	0.175136
1821	DB00784	mefenamic acid	1.66e-05	PC3	0	0.05	0.125308
1824	DB00732	atracurium besilate	3.2e-06	PC3	0	0.07	0.147394
1826	DB08621	thiamphenicol	1.12e-05	PC3	0	0.02	0.0794788
1827	DB00250	dapsone	1.62e-05	PC3	0	0.03	0.09844
1828	DB00788	naproxen	1.74e-05	PC3	0	0.01	0.05365
1830	DB01075	diphenhydramine	1.38e-05	PC3	0	0.02	0.0794788
1831		adiphenine	1.14e-05	PC3	0	0.07	0.147394
1832	DB11522	isoflupredone	9.6e-06	PC3	0	0.04	0.113488
1833	DB01667	8-azaguanine	2.62e-05	HL60	0	0.02	0.0794788
1834	DB13284	meticrane	1.46e-05	HL60	0	0	0
1835		trichostatin A	1e-07	HL60	0	0.01	0.05365
1836	DB06729	sulfaphenazole	1.28e-05	HL60	0	0	0
1837	DB00446	chloramphenicol	1.24e-05	HL60	0	0	0
1838	DB00721	procaine	1.46e-05	HL60	0	0.03	0.09844
1839	DB11473	metrifonate	1.56e-05	HL60	0	0	0
1840		morantel	1.08e-05	HL60	0	0	0
1841		todralazine	1.48e-05	HL60	0	0	0
1842	DB11100	allantoin	2.52e-05	HL60	0	0	0
1843	DB00868	benzonatate	6.6e-06	HL60	0	0.01	0.05365
1844	DB09357	dexpanthenol	1.94e-05	HL60	0	0.02	0.0794788
1845	DB08991	epirizole	1.7e-05	HL60	0	0	0
1846	DB09205	moxisylyte	1.26e-05	HL60	0	0.03	0.09844
1847	DB00564	carbamazepine	1.7e-05	HL60	0	0.02	0.0794788
1848	DB11181	homatropine	1.12e-05	HL60	0	0.01	0.05365
1849	DB00458	imipramine	1.26e-05	HL60	0	0.01	0.05365
1850	DB00819	acetazolamide	1.8e-05	HL60	0	0	0
1851	DB00774	hydroflumethiazide	1.2e-05	HL60	0	0.01	0.05365
1852	DB00359	sulfadiazine	1.6e-05	HL60	0	0	0
1853	DB00651	diprophylline	1.58e-05	HL60	0	0.05	0.125308
1854	DB00272	betazole	2.7e-05	HL60	0	0.04	0.113488
1855	DB00508	triflupromazine	1.02e-05	HL60	0	0	0
1856	DB01115	nifedipine	1.16e-05	HL60	0	0	0
1857	DB00605	sulindac	1.12e-05	HL60	0	0.05	0.125308
1859	DB00634	sulfacetamide	1.58e-05	HL60	0	0.01	0.05365
1860	DB09371	noretynodrel	1.34e-05	HL60	0	0.02	0.0794788
1861	DB00384	triamterene	1.58e-05	HL60	0	0.01	0.05365
1862	DB08942	isoxicam	1.2e-05	HL60	0	0.03	0.09844
1863	DB00784	mefenamic acid	1.66e-05	HL60	0	0.02	0.0794788
1864	DB00477	chlorpromazine	1.12e-05	HL60	0	0.04	0.113488
1865	DB00321	amitriptyline	1.28e-05	HL60	0	0.03	0.09844
1866	DB13574	heptaminol	2.2e-05	HL60	0	0.04	0.113488
1867	DB08621	thiamphenicol	1.12e-05	HL60	0	0.04	0.113488
1869	DB00788	naproxen	1.74e-05	HL60	0	0.01	0.05365
1870	DB00414	acetohexamide	1.24e-05	HL60	0	0.03	0.09844
1871	DB01075	diphenhydramine	1.38e-05	HL60	0	0.02	0.0794788
1872		adiphenine	1.14e-05	HL60	0	0.02	0.0794788
1873	DB11522	isoflupredone	9.6e-06	HL60	0	0.04	0.113488
1883	DB06147	sulfathiazole	1.56e-05	PC3	0	0	0
1884	DB00501	cimetidine	1.58e-05	PC3	0	0.22	0.264017
1885	DB13179	troleandomycin	5e-06	PC3	0	0.02	0.0794788
1886	DB06711	naphazoline	1.62e-05	PC3	0	0.01	0.05365
1887	DB00391	sulpiride	1.18e-05	PC3	0	0.02	0.0794788
1888	DB00805	minaprine	1.08e-05	PC3	0	0	0
1889	DB00527	cinchocaine	1.16e-05	PC3	0	0.01	0.05365
1890	DB00594	amiloride	1.32e-05	PC3	0	0.01	0.05365
1891		trichostatin A	1e-07	PC3	0	0.01	0.05365
1893	DB00366	doxylamine	1.02e-05	PC3	0	0.03	0.09844
1894	DB00205	pyrimethamine	1.6e-05	PC3	0	0.06	0.137491
1895	DB00208	ticlopidine	1.34e-05	PC3	0	0.02	0.0794788
1896	DB01110	miconazole	9.6e-06	PC3	0	0	0
1897	DB00635	prednisone	1.12e-05	PC3	0	0.01	0.05365
1898		amprolium	1.26e-05	PC3	0	0.01	0.05365
1899	DB00249	idoxuridine	1.12e-05	PC3	0	0.03	0.09844
1900	DB00330	ethambutol	1.44e-05	PC3	0	0.04	0.113488
1901	DB08960	hexamethonium bromide	1e-05	PC3	0	0.02	0.0794788
1903	DB12532	oxetacaine	8.6e-06	PC3	0	0	0
1904	DB08941	isoxsuprine	1.18e-05	PC3	0	0	0
[truncated: 4,101 more rows]

## Sheet: hECDAAnet_GSE147528
Instance ID in the Cmap database	DrugBank ID	Drug Name	Drug Dose in Cmap database	Cell lines in Cmap database	Eneichment Score (ES)	P-value	adjusted p-value (FDR)
5886	DB13242	bucladesine	7.8e-06	PC3	1.08563	0	0
3875	DB01325	quinethazone	1.38e-05	MCF7	0.954863	0	0
6353	DB00321	amitriptyline	1.28e-05	PC3	0.942824	0	0
7097		AR-A014418	1e-05	PC3	0.921965	0	0
1867	DB08621	thiamphenicol	1.12e-05	HL60	0.890867	0.01	0.367555
1668	DB08059	wortmannin	1e-08	MCF7	0.889699	0	0
1822	DB00477	chlorpromazine	1.12e-05	PC3	0.879518	0	0
2993		trichostatin A	1e-07	HL60	0.879471	0	0
6606	DB00338	omeprazole	1.16e-05	PC3	0.876265	0	0
1589	DB00841	dobutamine	1.18e-05	HL60	0.866667	0.01	0.367555
6223		dizocilpine	1.18e-05	MCF7	0.861657	0	0
7312	DB01605	pivmecillinam	8.4e-06	PC3	0.848621	0	0
5410	DB01428	oxybenzone	1.76e-05	MCF7	0.848581	0.01	0.367555
1329		N-acetyl-L-aspartic acid	2.28e-05	HL60	0.846038	0.02	0.367555
4946		retrorsine	1.14e-05	MCF7	0.842069	0	0
1627	DB01329	cefoperazone	5.8e-06	HL60	0.831878	0.02	0.367555
3786	DB01219	dantrolene	1.18e-05	PC3	0.827248	0	0
6516	DB11549	tiletamine	1.54e-05	MCF7	0.825731	0	0
825		rottlerin	1e-05	MCF7	0.823095	0	0
6106	DB00264	metoprolol	5.8e-06	MCF7	0.81897	0	0
204	DB00795	sulfasalazine	0.0001	MCF7	0.815107	0.01	0.367555
6361	DB13783	acemetacin	9.6e-06	PC3	0.809793	0	0
7399	DB01403	levomepromazine	9e-06	PC3	0.808012	0	0
4211	DB13808	mebhydrolin	4.8e-06	PC3	0.807986	0	0
2961		S-propranolol	1.36e-05	HL60	0.802848	0	0
1601		hemicholinium	7e-06	HL60	0.8	0.03	0.367555
5074	DB00477	chlorpromazine	1.12e-05	PC3	0.794944	0	0
6806	DB04839	cyproterone	9.6e-06	MCF7	0.792693	0	0
2058	DB00699	nicergoline	8.2e-06	PC3	0.792502	0.02	0.367555
6468	DB00351	megestrol	1.04e-05	MCF7	0.786227	0.02	0.367555
4785	DB00249	idoxuridine	1.12e-05	MCF7	0.780966	0.01	0.367555
1278	DB00382	tacrine	1.58e-05	HL60	0.777014	0.03	0.367555
1743		10-methoxyharmalan	1.86e-05	HL60	0.775758	0.04	0.367555
4190		norcyclobenzaprine	1.54e-05	PC3	0.773068	0.01	0.367555
5342	DB00411	carbachol	2.18e-05	MCF7	0.7725	0	0
6571	DB00770	alprostadil	1e-05	PC3	0.771205	0.04	0.367555
871		ionomycin	2e-06	MCF7	0.766382	0.06	0.367555
4166		solanine	4.6e-06	MCF7	0.765866	0.01	0.367555
1807	DB00458	imipramine	1.26e-05	PC3	0.763658	0.02	0.367555
7295		homochlorcyclizine	1.04e-05	PC3	0.76351	0.04	0.367555
4634	DB15492	eticlopride	1.06e-05	PC3	0.760583	0.01	0.367555
5082	DB06706	isometheptene	8.2e-06	PC3	0.757734	0.02	0.367555
3752	DB00420	promazine	1.24e-05	PC3	0.757429	0.01	0.367555
1654	DB00363	clozapine	1e-05	MCF7	0.757351	0.02	0.367555
2077	DB01418	acenocoumarol	1.14e-05	PC3	0.75284	0.06	0.367555
2383	DB00717	norethisterone	1.34e-05	HL60	0.751515	0	0
6246	DB01232	saquinavir	5.2e-06	MCF7	0.751515	0.01	0.367555
6818	DB01424	aminophenazone	1.72e-05	MCF7	0.751515	0.01	0.367555
7098		0316684-0000	1e-05	PC3	0.749711	0.1	0.367555
5013	DB00351	megestrol	1.04e-05	MCF7	0.747155	0.01	0.367555
7095		SC-19220	1e-05	PC3	0.746831	0.02	0.367555
4589	DB08800	chloropyramine	1.22e-05	PC3	0.745297	0.03	0.367555
1847	DB00564	carbamazepine	1.7e-05	HL60	0.745292	0.02	0.367555
7402	DB11430	monensin	5.8e-06	PC3	0.739301	0.03	0.367555
2945	DB01604	pivampicillin	8.6e-06	HL60	0.738292	0.01	0.367555
1550	DB00598	labetalol	1.1e-05	HL60	0.737349	0.02	0.367555
7222	DB00274	cefmetazole	8.2e-06	MCF7	0.735821	0.07	0.367555
7145	DB08313	nocodazole	1.32e-05	PC3	0.735795	0.03	0.367555
5118	DB13466	deptropine	7.6e-06	PC3	0.734622	0.01	0.367555
1744	DB00152	thiamine	1.18e-05	HL60	0.733333	0.08	0.367555
1971		trichostatin A	1e-07	HL60	0.733333	0.06	0.367555
1312	DB00451	levothyroxine sodium	5.2e-06	HL60	0.728231	0.04	0.367555
917	DB04216	quercetin	1e-06	MCF7	0.727624	0.06	0.367555
1838	DB00721	procaine	1.46e-05	HL60	0.727076	0.04	0.367555
1319	DB01330	cefotetan	7e-06	HL60	0.725679	0.04	0.367555
6099	DB00576	sulfamethizole	1.48e-05	MCF7	0.724741	0.03	0.367555
3538		Prestwick-1083	8.8e-06	MCF7	0.723782	0.02	0.367555
2140		seneciphylline	1.2e-05	HL60	0.72146	0.04	0.367555
4829	DB12532	oxetacaine	8.6e-06	MCF7	0.720974	0	0
4194	DB00205	pyrimethamine	1.6e-05	PC3	0.718488	0.01	0.367555
5944		AG-013608	1e-05	MCF7	0.717467	0.01	0.367555
7527		CP-645525-01	1e-05	PC3	0.712845	0.03	0.367555
1888	DB00805	minaprine	1.08e-05	PC3	0.712255	0.04	0.367555
5594		trichostatin A	1e-06	MCF7	0.711893	0.02	0.367555
1498	DB06803	niclosamide	1.22e-05	MCF7	0.711662	0.03	0.367555
3533	DB01168	procarbazine	1.56e-05	MCF7	0.711324	0	0
5838	DB00254	doxycycline	8.4e-06	PC3	0.709411	0.04	0.367555
7477	DB00732	atracurium besilate	3.2e-06	MCF7	0.709207	0.06	0.367555
1425	DB13026	ornidazole	1.82e-05	HL60	0.709091	0.04	0.367555
2021	DB00434	cyproheptadine	1.24e-05	HL60	0.709091	0.07	0.367555
2393	DB00860	prednisolone	1.1e-05	HL60	0.709091	0.03	0.367555
2391	DB00540	nortriptyline	1.34e-05	HL60	0.708117	0.03	0.367555
3377	DB02187	equilin	1.5e-05	MCF7	0.70616	0.01	0.367555
3207	DB04840	debrisoquine	9e-06	MCF7	0.705483	0.04	0.367555
3048	DB00818	propofol	2.24e-05	HL60	0.705367	0	0
921	DB00877	sirolimus	1e-07	MCF7	0.705085	0.08	0.367555
5689	DB00265	crotamiton	1.96e-05	MCF7	0.704266	0.01	0.367555
5531	DB13785	dropropizine	1.7e-05	MCF7	0.702556	0.05	0.367555
2073	DB01622	thioproperazine	6.2e-06	PC3	0.700803	0.05	0.367555
3704	DB11430	monensin	5.8e-06	PC3	0.698556	0.03	0.367555
1817	DB00634	sulfacetamide	1.58e-05	PC3	0.697963	0.05	0.367555
1555	DB00575	clonidine	1.5e-05	HL60	0.697299	0.03	0.367555
7244	DB14081	asiaticoside	4.2e-06	PC3	0.696532	0.08	0.367555
2893		10-methoxyharmalan	1.86e-05	MCF7	0.694976	0.03	0.367555
1731	DB01176	cyclizine	1.32e-05	HL60	0.694731	0.02	0.367555
987	DB00877	sirolimus	1e-07	MCF7	0.694428	0.02	0.367555
6201	DB00877	sirolimus	1e-07	HL60	0.693385	0.02	0.367555
2376	DB00427	triprolidine	1.28e-05	HL60	0.693112	0.05	0.367555
3579		kaempferol	1.4e-05	MCF7	0.692866	0.02	0.367555
7342		epitiostanol	1.3e-05	MCF7	0.692385	0.07	0.367555
1325		lysergol	1.58e-05	HL60	0.691073	0.09	0.367555
1337	DB01602	bacampicillin	8e-06	HL60	0.691062	0.04	0.367555
3618	DB08981	fenbufen	1.58e-05	MCF7	0.688825	0.01	0.367555
2409	DB00887	bumetanide	1.1e-05	HL60	0.688625	0.02	0.367555
7146	DB00788	naproxen	1.58e-05	PC3	0.687816	0.05	0.367555
2862	DB09282	molsidomine	1.66e-05	MCF7	0.686837	0.04	0.367555
1735	DB11389	clorsulon	1.06e-05	HL60	0.68608	0.04	0.367555
1956	DB00850	perphenazine	1e-05	PC3	0.684848	0.02	0.367555
2946	DB13227	tribenoside	8.4e-06	HL60	0.6839	0.04	0.367555
1326		N-acetylmuramic acid	1.36e-05	HL60	0.683714	0.06	0.367555
7274	DB08621	thiamphenicol	1.12e-05	PC3	0.683712	0.09	0.367555
3203	DB00346	alfuzosin	9.4e-06	MCF7	0.683535	0.03	0.367555
2373	DB01148	flavoxate	9.4e-06	HL60	0.68333	0.05	0.367555
2147		yohimbic acid	1.12e-05	HL60	0.682085	0.03	0.367555
447	DB00755	tretinoin	1e-06	PC3	0.681718	0.03	0.367555
6959	DB08059	wortmannin	1e-08	MCF7	0.681426	0.09	0.367555
7147	DB12554	mebeverine	8.6e-06	PC3	0.681137	0.08	0.367555
6803	DB09342	propoxycaine	1.2e-05	MCF7	0.678372	0.04	0.367555
6816	DB00851	dacarbazine	2.2e-05	MCF7	0.678202	0.02	0.367555
6001	DB08979	fenspiride	1.34e-05	MCF7	0.676955	0.05	0.367555
5261	DB01599	probucol	7.8e-06	MCF7	0.676848	0.03	0.367555
2338	DB00643	mebendazole	1.36e-05	HL60	0.676788	0.07	0.367555
3320	DB00336	nitrofural	2.02e-05	MCF7	0.676678	0.02	0.367555
7163	DB13232	suxibuzone	9.2e-06	MCF7	0.675434	0.02	0.367555
4752	DB12293	nefopam	1.38e-05	MCF7	0.672638	0.06	0.367555
6732		N6-methyladenosine	1.42e-05	PC3	0.671573	0.06	0.367555
7153	DB13331	pyrithyldione	2.4e-05	PC3	0.670435	0.07	0.367555
7212		delsoline	8.6e-06	MCF7	0.669984	0.06	0.367555
3097	DB01708	prasterone	1.22e-05	HL60	0.669909	0.05	0.367555
3403	DB00253	medrysone	1.16e-05	MCF7	0.667738	0.05	0.367555
3432	DB00763	thiamazole	3.5e-05	MCF7	0.667721	0.03	0.367555
1378	DB04821	nomifensine	1.12e-05	HL60	0.666667	0.07	0.367555
1468	DB00805	minaprine	1.08e-05	MCF7	0.666667	0.06	0.367555
501	DB02656	LY-294002	1e-05	SKMEL5	0.666224	0.05	0.367555
7273	DB00735	naftifine	1.24e-05	PC3	0.665112	0.07	0.367555
5394	DB00345	aminohippuric acid	2.06e-05	MCF7	0.664643	0.03	0.367555
2410	DB01074	perhexiline	1.02e-05	HL60	0.664488	0.06	0.367555
2060	DB01424	aminophenazone	1.72e-05	PC3	0.663798	0.1	0.367555
4399	DB13483	etamsylate	1.52e-05	MCF7	0.662584	0.05	0.367555
2971	DB01168	procarbazine	1.56e-05	HL60	0.662225	0.06	0.367555
3832		pempidine	1.3e-05	MCF7	0.661578	0.01	0.367555
7175		hecogenin	9.2e-06	MCF7	0.660606	0.09	0.367555
2622	DB13588	naftidrofuryl	8.4e-06	MCF7	0.660568	0.04	0.367555
7197	DB00951	isoniazid	2.92e-05	MCF7	0.660232	0.09	0.367555
4988	DB00590	doxazosin	7.4e-06	MCF7	0.660217	0.08	0.367555
1823	DB00321	amitriptyline	1.28e-05	PC3	0.659051	0.15	0.367555
3426	DB01327	cefazolin	8.4e-06	MCF7	0.658779	0.09	0.367555
1943	DB13456	midecamycin	5e-06	PC3	0.658226	0.09	0.367555
7059	DB02587	colforsin	5e-07	PC3	0.658055	0.08	0.367555
4580	DB00394	beclometasone	7.6e-06	PC3	0.657898	0	0
6838		epivincamine	1.12e-05	MCF7	0.657104	0.06	0.367555
1613	DB01407	clenbuterol	1.28e-05	HL60	0.656164	0.05	0.367555
6907		PF-00562151-00	1e-05	PC3	0.65614	0.06	0.367555
3537	DB01019	bethanechol	2.04e-05	MCF7	0.655663	0.02	0.367555
3084	DB04815	clioquinol	1.3e-05	HL60	0.655424	0.01	0.367555
4672	DB00836	loperamide	7.8e-06	PC3	0.653377	0.03	0.367555
1832	DB11522	isoflupredone	9.6e-06	PC3	0.651672	0.12	0.367555
5880	DB00623	fluphenazine	7.8e-06	PC3	0.651059	0.06	0.367555
3346	DB01357	mestranol	1.28e-05	MCF7	0.649937	0.03	0.367555
7128	DB08799	antazoline	1.32e-05	PC3	0.649898	0.1	0.367555
7276	DB00280	disopyramide	1.18e-05	PC3	0.649453	0.1	0.367555
5528	DB00605	sulindac	1.12e-05	MCF7	0.648667	0.03	0.367555
2552	DB11518	flunixin	8.2e-06	HL60	0.648284	0	0
7457	DB12401	bromperidol	9.6e-06	MCF7	0.647182	0.03	0.367555
6100	DB01438	phenazopyridine	1.6e-05	MCF7	0.646869	0.06	0.367555
3029		dimethadione	3.1e-05	HL60	0.645642	0.02	0.367555
6830		clofilium tosylate	7.8e-06	MCF7	0.643016	0.03	0.367555
1718	DB00498	phenindione	1.8e-05	HL60	0.642424	0.03	0.367555
1732		trichostatin A	1e-07	HL60	0.642424	0.16	0.367555
3735		PNU-0230031	1e-06	PC3	0.642424	0.05	0.367555
6091	DB14128	nadide	6e-06	MCF7	0.642424	0.06	0.367555
5515	DB13346	bufexamac	1.8e-05	MCF7	0.641393	0.09	0.367555
2075	DB00960	pindolol	1.62e-05	PC3	0.641127	0.1	0.367555
1271		N6-methyladenosine	1.42e-05	HL60	0.639598	0.08	0.367555
6706	DB00604	cisapride	8.6e-06	PC3	0.639011	0.05	0.367555
3081		(-)-MK-801	1.18e-05	HL60	0.638769	0.03	0.367555
6497		Prestwick-920	1.36e-05	MCF7	0.638707	0.1	0.367555
5535	DB00355	aztreonam	9.2e-06	MCF7	0.637958	0.1	0.367555
6240	DB00871	terbutaline	7.2e-06	MCF7	0.637307	0.06	0.367555
5741		fluorocurarine	1.16e-05	PC3	0.637139	0.11	0.367555
3412	DB00573	fenoprofen	7.2e-06	MCF7	0.63707	0.02	0.367555
6648	DB00882	clomifene	6.6e-06	PC3	0.636846	0.03	0.367555
2806		harman	1.82e-05	MCF7	0.636364	0.06	0.367555
3835	DB04817	metamizole sodium	1.2e-05	MCF7	0.635731	0.08	0.367555
7284	DB09167	dosulepin	1.2e-05	PC3	0.635352	0.08	0.367555
5881	DB01246	alimemazine	5.4e-06	PC3	0.634255	0.06	0.367555
2728	DB11502	butacaine	1.3e-05	HL60	0.633463	0.05	0.367555
2372	DB08954	ifenprodil	8.4e-06	HL60	0.633214	0.12	0.367555
5273	DB00502	haloperidol	1.06e-05	MCF7	0.632348	0.02	0.367555
1209	DB00313	valproic acid	0.001	PC3	0.631654	0.11	0.367555
266	DB01041	thalidomide	0.0001	MCF7	0.630828	0.04	0.367555
6489	DB00465	ketorolac	1.06e-05	MCF7	0.630418	0.05	0.367555
2943	DB14081	asiaticoside	4.2e-06	HL60	0.629771	0.13	0.367555
3413		furaltadone	1.1e-05	MCF7	0.629089	0.08	0.367555
2703	DB08059	wortmannin	1e-08	HL60	0.628813	0.08	0.367555
1203	DB00502	haloperidol	1e-05	PC3	0.628039	0.1	0.367555
3984		pronetalol	1.5e-05	PC3	0.628033	0.02	0.367555
3736		0179445-0000	1e-06	PC3	0.627319	0.06	0.367555
6639	DB11423	lasalocid	6.6e-06	PC3	0.626566	0.06	0.367555
3740	DB13044	gossypol	7.8e-06	PC3	0.626238	0.05	0.367555
4840	DB13510	buflomedil	1.16e-05	MCF7	0.625165	0.13	0.367555
6843		isocorydine	1.18e-05	MCF7	0.625125	0.04	0.367555
2856	DB02789	pregnenolone	1.26e-05	MCF7	0.625001	0.07	0.367555
2399	DB04552	niflumic acid	1.42e-05	HL60	0.622738	0.1	0.367555
3548	DB00826	natamycin	6e-06	MCF7	0.622434	0.05	0.367555
7058		SB-202190	1e-06	PC3	0.621818	0.1	0.367555
6239	DB13337	pheneticillin	1e-05	MCF7	0.621367	0.07	0.367555
7390		PNU-0251126	1e-06	PC3	0.621149	0.07	0.367555
6243	DB00755	tretinoin	1.34e-05	MCF7	0.620684	0.08	0.367555
885		5186223	1.2e-05	MCF7	0.620347	0.08	0.367555
4741	DB09018	bromopride	1.16e-05	MCF7	0.619639	0.03	0.367555
6929	DB00313	valproic acid	0.001	MCF7	0.619625	0.08	0.367555
4761		foliosidine	1.3e-05	MCF7	0.618744	0.07	0.367555
6667	DB00351	megestrol	1.04e-05	PC3	0.618394	0.02	0.367555
364		trichostatin A	1e-07	HL60	0.618182	0.09	0.367555
3876	DB00991	oxaprozin	1.36e-05	MCF7	0.618182	0.09	0.367555
5360	DB09093	chlortetracycline	7.8e-06	MCF7	0.618087	0.04	0.367555
6101	DB00891	sulfapyridine	1.6e-05	MCF7	0.618057	0.07	0.367555
4765	DB01146	diphenylpyraline	1.26e-05	MCF7	0.617428	0.05	0.367555
3393	DB15492	eticlopride	1.06e-05	MCF7	0.616883	0.06	0.367555
7458	DB14681	cortisone	1.1e-05	MCF7	0.616746	0.15	0.367555
1489	DB01435	phenazone	2.12e-05	MCF7	0.616721	0.12	0.367555
2398	DB13785	dropropizine	1.7e-05	HL60	0.615314	0.08	0.367555
4360	DB00780	phenelzine	1.7e-05	MCF7	0.615052	0	0
7074	DB11841	MS-275	1e-05	PC3	0.614953	0.14	0.367555
5485	DB00711	diethylcarbamazine	1.02e-05	MCF7	0.61468	0.02	0.367555
1819	DB00384	triamterene	1.58e-05	PC3	0.614275	0.09	0.367555
3641	DB01216	finasteride	1.08e-05	MCF7	0.614074	0.03	0.367555
4972	DB00723	methoxamine	1.62e-05	MCF7	0.613785	0.09	0.367555
6400		AG-013608	1e-05	PC3	0.613262	0.04	0.367555
2654		3-hydroxy-DL-kynurenine	1.78e-05	MCF7	0.612387	0.07	0.367555
5071	DB04552	niflumic acid	1.42e-05	PC3	0.611801	0.06	0.367555
6846	DB00264	metoprolol	5.8e-06	MCF7	0.611578	0.05	0.367555
6867	DB00947	fulvestrant	1e-06	PC3	0.6113	0.08	0.367555
7084	DB11841	MS-275	1e-05	PC3	0.61125	0.07	0.367555
3304	DB00153	ergocalciferol	1e-05	MCF7	0.611149	0.14	0.367555
3311	DB08839	serotonin	1.88e-05	MCF7	0.610691	0.05	0.367555
7308	DB00593	ethosuximide	2.84e-05	PC3	0.610136	0.12	0.367555
5520	DB11582	thiocolchicoside	7e-06	MCF7	0.609706	0.08	0.367555
5764	DB00871	terbutaline	7.2e-06	PC3	0.609256	0.1	0.367555
2295	DB00740	riluzole	1.48e-05	MCF7	0.608889	0.03	0.367555
5460	DB13783	acemetacin	9.6e-06	MCF7	0.608775	0.08	0.367555
6137		methanthelinium bromide	9.6e-06	HL60	0.608197	0.05	0.367555
3864		ethisterone	1.28e-05	MCF7	0.608182	0.09	0.367555
448		trichostatin A	1e-07	PC3	0.607732	0.08	0.367555
6980	DB02546	vorinostat	1e-05	MCF7	0.607677	0.14	0.367555
6447	DB01011	metyrapone	1.76e-05	MCF7	0.607095	0.08	0.367555
3862	DB00379	mexiletine	1.86e-05	MCF7	0.606651	0.05	0.367555
4729	DB13758	meclofenoxate	1.36e-05	MCF7	0.606533	0.09	0.367555
7543		IC-86621	1e-06	MCF7	0.605778	0.07	0.367555
3408	DB09002	cloperastine	1.1e-05	MCF7	0.604681	0.06	0.367555
4640	DB01184	domperidone	7.4e-06	PC3	0.604484	0.06	0.367555
1917	DB00281	lidocaine	1.48e-05	PC3	0.604292	0.12	0.367555
4093	DB02329	carbenoxolone	6.6e-06	PC3	0.603763	0.1	0.367555
6808	DB04574	estropipate	9.2e-06	MCF7	0.603529	0.13	0.367555
826	DB00457	prazosin	1e-05	MCF7	0.602966	0.07	0.367555
7329	DB01337	pancuronium bromide	5.4e-06	MCF7	0.602621	0.17	0.367555
7241	DB00244	mesalazine	2.62e-05	MCF7	0.602434	0.1	0.367555
1799		todralazine	1.48e-05	PC3	0.602065	0.13	0.367555
5869	DB06691	mepyramine	1e-05	PC3	0.601412	0.1	0.367555
1421		trichostatin A	1e-07	HL60	0.601136	0.07	0.367555
5510	DB04711	adipiodone	3.6e-06	MCF7	0.600378	0.05	0.367555
1240	DB00313	valproic acid	0.0005	PC3	0.600236	0.1	0.367555
6002	DB06704	iobenguane	1.08e-05	MCF7	0.600055	0.09	0.367555
1492	DB01620	pheniramine	1.12e-05	MCF7	0.6	0.08	0.367555
1659		trichostatin A	1e-06	MCF7	0.6	0.06	0.367555
2847	DB01045	rifampicin	4.8e-06	MCF7	0.6	0.14	0.367555
5301	DB00627	nicotinic acid	3.24e-05	MCF7	0.6	0.05	0.367555
6939	DB02546	vorinostat	1e-05	MCF7	0.6	0.09	0.367555
2571		lithocholic acid	1.06e-05	HL60	0.599536	0.07	0.367555
3542	DB01130	prednicarbate	8.2e-06	MCF7	0.599263	0.09	0.367555
4207	DB13683	quinisocaine	1.3e-05	PC3	0.599024	0.06	0.367555
2803		yohimbic acid	1.12e-05	MCF7	0.598936	0.1	0.367555
5300	DB11413	florfenicol	1.12e-05	MCF7	0.598881	0.05	0.367555
3351		(+/-)-catechin	1.38e-05	MCF7	0.59779	0.1	0.367555
2970	DB00447	loracarbef	1.08e-05	HL60	0.597543	0.11	0.367555
3268	DB00924	cyclobenzaprine	1.28e-05	MCF7	0.597045	0.07	0.367555
4839	DB13726	sulfaguanidine	1.86e-05	MCF7	0.596249	0.08	0.367555
5790		tropine	2.84e-05	PC3	0.594486	0.12	0.367555
1821	DB00784	mefenamic acid	1.66e-05	PC3	0.594126	0.09	0.367555
3218	DB00263	sulfafurazole	1.5e-05	MCF7	0.593939	0.07	0.367555
3067	DB13443	(-)-atenolol	1.5e-05	HL60	0.593845	0.07	0.367555
2460	DB00810	biperiden	1.14e-05	HL60	0.593706	0.11	0.367555
2879	DB08989	etamivan	1.8e-05	MCF7	0.593666	0.08	0.367555
5737	DB13790	fipexide	9.4e-06	PC3	0.592585	0.08	0.367555
4625	DB01172	kanamycin	6.8e-06	PC3	0.592509	0.11	0.367555
2079	DB01234	dexamethasone	9.2e-06	PC3	0.592336	0.15	0.367555
7474	DB01039	fenofibrate	1.1e-05	MCF7	0.592072	0.15	0.367555
3340	DB00641	simvastatin	9.6e-06	MCF7	0.592015	0.08	0.367555
5576	DB02656	LY-294002	1e-07	MCF7	0.591729	0.04	0.367555
6390		5707885	5e-05	PC3	0.591583	0.05	0.367555
3463	DB00827	cinoxacin	1.52e-05	MCF7	0.591537	0.09	0.367555
3306		epiandrosterone	1.38e-05	MCF7	0.590866	0.07	0.367555
5733		syrosingopine	6e-06	PC3	0.590788	0.04	0.367555
5703	DB00629	guanabenz	1.38e-05	MCF7	0.588275	0.09	0.367555
3165	DB00755	tretinoin	1.34e-05	MCF7	0.58795	0.07	0.367555
1543	DB00787	aciclovir	1.78e-05	MCF7	0.586157	0.14	0.367555
5387	DB00661	verapamil	8.2e-06	MCF7	0.585995	0.11	0.367555
6055		myosmine	2.74e-05	MCF7	0.585316	0.07	0.367555
7544		CP-944629	1e-05	MCF7	0.58531	0.11	0.367555
6759	DB00571	propranolol	1.36e-05	PC3	0.585255	0.06	0.367555
4321		ethoxyquin	1.84e-05	PC3	0.584476	0.12	0.367555
2506	DB04574	estropipate	9.2e-06	HL60	0.584343	0.06	0.367555
4820		SR-95531	1.08e-05	MCF7	0.583723	0.08	0.367555
3083	DB11413	florfenicol	1.12e-05	HL60	0.58355	0.15	0.367555
4599		Prestwick-692	7.4e-06	PC3	0.583448	0.1	0.367555
6923	DB00502	haloperidol	1e-05	MCF7	0.583051	0.11	0.367555
6617	DB00339	pyrazinamide	3.24e-05	PC3	0.582813	0.11	0.367555
7267		Prestwick-1082	1.2e-05	PC3	0.582587	0.13	0.367555
5517	DB00896	rimexolone	1.08e-05	MCF7	0.582166	0.04	0.367555
5451	DB11371	alfaxalone	1.2e-05	MCF7	0.582156	0.13	0.367555
2371	DB00722	lisinopril	9e-06	HL60	0.582155	0.1	0.367555
3836	DB13442	citiolone	2.52e-05	MCF7	0.581846	0.13	0.367555
6401		F0447-0125	1e-05	PC3	0.581255	0.06	0.367555
3549	DB01232	saquinavir	5.2e-06	MCF7	0.580259	0.1	0.367555
4637	DB00850	perphenazine	1e-05	PC3	0.578749	0.1	0.367555
1232	DB00197	troglitazone	1e-05	PC3	0.578694	0.16	0.367555
6708	DB00875	flupentixol	7.8e-06	PC3	0.577917	0.05	0.367555
2357	DB00780	phenelzine	1.7e-05	HL60	0.577052	0.13	0.367555
5479	DB09069	trimetazidine	1.18e-05	MCF7	0.576816	0.1	0.367555
6865		SC-560	1e-05	PC3	0.576585	0.09	0.367555
6213		syrosingopine	6e-06	MCF7	0.576189	0.11	0.367555
5506	DB01131	proguanil	1.38e-05	MCF7	0.575816	0.07	0.367555
388	DB00481	raloxifene	1e-07	HL60	0.575758	0.07	0.367555
1628	DB00502	haloperidol	1e-05	MCF7	0.575758	0.06	0.367555
2396	DB01127	econazole	9e-06	HL60	0.575758	0.17	0.367555
2869	DB00608	chloroquine	7.8e-06	MCF7	0.575758	0.1	0.367555
6908		BAS-012416453	3.8e-05	MCF7	0.575758	0.1	0.367555
7322		pronetalol	1.5e-05	MCF7	0.575758	0.08	0.367555
5909		AG-013608	1e-05	PC3	0.57554	0.08	0.367555
6697	DB00392	profenamine	1.14e-05	PC3	0.575114	0.07	0.367555
5254		lorglumide	8.4e-06	MCF7	0.574678	0.11	0.367555
6085		trichostatin A	1e-07	MCF7	0.574585	0.07	0.367555
4205	DB08941	isoxsuprine	1.18e-05	PC3	0.574485	0.06	0.367555
4492		clofilium tosylate	7.8e-06	PC3	0.574296	0.08	0.367555
5815	DB01190	clindamycin	8.6e-06	PC3	0.574081	0.06	0.367555
7340	DB13307	proscillaridin	7.6e-06	MCF7	0.573972	0.09	0.367555
5820	DB00844	nalbuphine	1.02e-05	PC3	0.573542	0.14	0.367555
4969	DB13216	oxolamine	9.2e-06	MCF7	0.572997	0.1	0.367555
401	DB02656	LY-294002	1e-05	ssMCF7	0.571897	0.15	0.367555
4083	DB00726	trimipramine	9.8e-06	PC3	0.571866	0.03	0.367555
2644	DB00363	clozapine	1.22e-05	MCF7	0.571655	0.06	0.367555
5269	DB00712	flurbiprofen	1.64e-05	MCF7	0.570912	0.1	0.367555
5593	DB00412	rosiglitazone	1e-05	MCF7	0.570669	0.09	0.367555
2432	DB01400	neostigmine bromide	1.32e-05	HL60	0.570328	0.1	0.367555
4762	DB13044	gossypol	7.8e-06	MCF7	0.570032	0.12	0.367555
4317	DB00746	deferoxamine	6e-06	PC3	0.569932	0.1	0.367555
4393	DB01337	pancuronium bromide	5.4e-06	MCF7	0.569676	0.06	0.367555
5877	DB11376	azaperone	1.22e-05	PC3	0.569666	0.11	0.367555
4671	DB01407	clenbuterol	1.28e-05	PC3	0.569152	0.05	0.367555
5850	DB00194	vidarabine	1.5e-05	PC3	0.569151	0.07	0.367555
5728		tetrahydroalstonine	1.14e-05	PC3	0.569053	0.08	0.367555
1233	DB00412	rosiglitazone	1e-05	PC3	0.568879	0.11	0.367555
5975	DB00877	sirolimus	1e-07	MCF7	0.56879	0.07	0.367555
4024	DB12029	chlorogenic acid	1.12e-05	PC3	0.568545	0.09	0.367555
4183	DB06147	sulfathiazole	1.56e-05	PC3	0.568286	0.06	0.367555
4245	DB11385	cefalonium	8.8e-06	PC3	0.568094	0.05	0.367555
2680	DB02546	vorinostat	1e-05	HL60	0.567907	0.09	0.367555
4990	DB04819	methapyrilene	1.34e-05	MCF7	0.567881	0.1	0.367555
6824		napelline	1.12e-05	MCF7	0.567797	0.04	0.367555
7265	DB00584	enalapril	8.2e-06	PC3	0.567651	0.1	0.367555
3745		betonicine	2.52e-05	PC3	0.567293	0.09	0.367555
5755	DB11696	racecadotril	1.04e-05	PC3	0.566997	0.11	0.367555
7316	DB00811	ribavirin	1.64e-05	PC3	0.566466	0.19	0.367555
6268	DB00703	methazolamide	1.7e-05	MCF7	0.566014	0.07	0.367555
4215	DB00943	zalcitabine	1.9e-05	PC3	0.565718	0.06	0.367555
5859	DB12131	vinpocetine	1.14e-05	PC3	0.565473	0.13	0.367555
5336		trichostatin A	1e-07	MCF7	0.565056	0.1	0.367555
1771		calycanthine	1.16e-05	HL60	0.564822	0.1	0.367555
2992	DB00778	roxithromycin	4.8e-06	HL60	0.564577	0.04	0.367555
4389	DB00391	sulpiride	1.18e-05	MCF7	0.564468	0.1	0.367555
5993	DB13449	proxyphylline	1.68e-05	MCF7	0.564449	0.12	0.367555
6357		Prestwick-1083	8.8e-06	PC3	0.563229	0.11	0.367555
6379		PF-00539758-00	1e-05	PC3	0.562227	0.09	0.367555
496	DB01088	iloprost	1e-06	SKMEL5	0.561818	0.13	0.367555
2072	DB00493	cefotaxime	8.4e-06	PC3	0.561798	0.19	0.367555
7529	DB04786	suramin sodium	1e-05	PC3	0.561401	0.16	0.367555
2537	DB01438	phenazopyridine	1.6e-05	HL60	0.560935	0.12	0.367555
414	DB00783	estradiol	1e-08	ssMCF7	0.560815	0.13	0.367555
2694		trichostatin A	1e-06	HL60	0.559735	0.15	0.367555
7075		AH-6809	1e-06	PC3	0.559619	0.17	0.367555
5774		Prestwick-1085	1.46e-05	PC3	0.559578	0.09	0.367555
3111	DB04711	adipiodone	3.6e-06	HL60	0.558974	0.14	0.367555
3684	DB01247	isocarboxazid	1.72e-05	PC3	0.558879	0.13	0.367555
6642	DB00590	doxazosin	7.4e-06	PC3	0.558815	0.15	0.367555
2902		pronetalol	1.5e-05	HL60	0.558153	0.11	0.367555
2407	DB00982	isotretinoin	1.34e-05	HL60	0.558061	0.1	0.367555
5264	DB14007	pentetic acid	1.02e-05	MCF7	0.557597	0.12	0.367555
1479		amprolium	1.26e-05	MCF7	0.557215	0.1	0.367555
6814	DB00575	clonidine	1.5e-05	MCF7	0.556631	0.11	0.367555
4837		(+/-)-catechin	1.38e-05	MCF7	0.556465	0.08	0.367555
6199	DB00313	valproic acid	0.0005	HL60	0.556432	0.09	0.367555
411	DB06819	sodium phenylbutyrate	0.001	HL60	0.555881	0.11	0.367555
5545	DB11522	isoflupredone	9.6e-06	MCF7	0.555152	0.11	0.367555
7071		CAY-10397	1e-05	PC3	0.554872	0.14	0.367555
4159		tetroquinone	2.1e-05	MCF7	0.554064	0.13	0.367555
890		5149715	1e-05	MCF7	0.553759	0.15	0.367555
3074	DB06439	tyloxapol	4e-06	HL60	0.553332	0.09	0.367555
4586	DB00091	ciclosporin	3.4e-06	PC3	0.552985	0.07	0.367555
2696	DB02656	LY-294002	1e-05	HL60	0.552964	0.03	0.367555
7214	DB13642	pridinol	1.02e-05	MCF7	0.552574	0.13	0.367555
3132		Prestwick-972	2.26e-05	HL60	0.551984	0.18	0.367555
7102		0198306-0000	1e-05	PC3	0.551651	0.13	0.367555
224	DB00755	tretinoin	1e-06	MCF7	0.551515	0.05	0.367555
2397	DB00584	enalapril	8.2e-06	HL60	0.551515	0.15	0.367555
2400	DB00985	dimenhydrinate	8.6e-06	HL60	0.551515	0.05	0.367555
5207		alpha-estradiol	1e-08	MCF7	0.551515	0.08	0.367555
5456	DB06762	pinacidil	1.64e-05	MCF7	0.551515	0.08	0.367555
5496	DB01017	minocycline	8e-06	MCF7	0.551515	0.12	0.367555
2156	DB00378	dydrogesterone	1.28e-05	HL60	0.551238	0.1	0.367555
2253	DB01059	norfloxacin	1.26e-05	MCF7	0.551214	0.08	0.367555
1154	DB12442	alvespimycin	1e-07	HL60	0.551198	0.13	0.367555
5849	DB01016	glibenclamide	8e-06	PC3	0.550126	0.07	0.367555
2173	DB00420	promazine	1.24e-05	HL60	0.550055	0.13	0.367555
6585	DB03444	6-bromoindirubin-3'-oxime	5e-07	PC3	0.549826	0.16	0.367555
5056		Prestwick-920	1.36e-05	PC3	0.54918	0.13	0.367555
2874	DB00933	mesoridazine	7.4e-06	MCF7	0.548528	0.13	0.367555
3283	DB00390	digoxin	5.2e-06	MCF7	0.548324	0.19	0.367555
5825	DB15588	ursolic acid	8.8e-06	PC3	0.548116	0.13	0.367555
2819		Prestwick-682	6e-06	MCF7	0.548021	0.11	0.367555
4800	DB00350	minoxidil	1.92e-05	MCF7	0.547485	0.14	0.367555
6017	DB00982	isotretinoin	1.34e-05	MCF7	0.547433	0.16	0.367555
5025	DB08792	diloxanide	1.22e-05	MCF7	0.54726	0.18	0.367555
7271	DB01186	pergolide	9.8e-06	PC3	0.546496	0.17	0.367555
2998	DB01021	trichlormethiazide	1.06e-05	HL60	0.546339	0.07	0.367555
3387	DB14007	pentetic acid	1.02e-05	MCF7	0.545798	0.14	0.367555
4572	DB00115	cyanocobalamin	3e-06	PC3	0.543706	0.1	0.367555
5064	DB13026	ornidazole	1.82e-05	PC3	0.543622	0.11	0.367555
2128	DB00939	meclofenamic acid	1.18e-05	PC3	0.543445	0.17	0.367555
6491	DB13251	octopamine	2.1e-05	MCF7	0.543355	0.07	0.367555
5871	DB01580	oxprenolol	1.32e-05	PC3	0.543128	0.08	0.367555
6484	DB01586	ursodeoxycholic acid	1.02e-05	MCF7	0.54305	0.08	0.367555
2266	DB13627	oxolinic acid	1.54e-05	MCF7	0.54304	0.08	0.367555
3682		Prestwick-675	1e-05	PC3	0.542731	0.08	0.367555
4257	DB13726	sulfaguanidine	1.86e-05	PC3	0.542607	0.09	0.367555
2067	DB15588	ursolic acid	8.8e-06	PC3	0.541723	0.16	0.367555
3701	DB01403	levomepromazine	9e-06	PC3	0.541539	0.12	0.367555
6618		protoveratrine A	5e-06	PC3	0.541103	0.09	0.367555
5976		trichostatin A	1e-06	MCF7	0.540675	0.08	0.367555
7558		CP-863187	1e-05	PC3	0.54066	0.11	0.367555
5500		lobelanidine	1.06e-05	MCF7	0.540612	0.12	0.367555
3087	DB01054	nitrendipine	1.1e-05	HL60	0.540486	0.1	0.367555
3554		Prestwick-1085	1.46e-05	MCF7	0.540322	0.09	0.367555
4790		pepstatin	5.8e-06	MCF7	0.540304	0.12	0.367555
3224	DB01172	kanamycin	6.8e-06	MCF7	0.540202	0.15	0.367555
6206		ricinine	2.44e-05	MCF7	0.539922	0.14	0.367555
3834		famprofazone	1.06e-05	MCF7	0.539837	0.13	0.367555
3720	DB09401	isosorbide	1.7e-05	PC3	0.539235	0.18	0.367555
3239	DB00845	clofazimine	8.4e-06	MCF7	0.538589	0.15	0.367555
5610	DB11186	pentoxyverine	7.6e-06	MCF7	0.538371	0.04	0.367555
2385	DB14681	cortisone	1.1e-05	HL60	0.537972	0.14	0.367555
6691	DB01095	fluvastatin	9.2e-06	PC3	0.537936	0.16	0.367555
6889		AG-012559	1e-05	MCF7	0.537516	0.13	0.367555
5683		N-acetyl-L-leucine	2.3e-05	MCF7	0.537242	0.07	0.367555
5275	DB03671	digoxigenin	1.02e-05	MCF7	0.536879	0.14	0.367555
1224	DB00831	trifluoperazine	1e-05	PC3	0.536115	0.11	0.367555
2403	DB01186	pergolide	9.8e-06	HL60	0.535653	0.12	0.367555
2641	DB00433	prochlorperazine	6.6e-06	MCF7	0.535637	0.18	0.367555
6378	DB00580	valdecoxib	1e-05	PC3	0.535537	0.12	0.367555
4989		thioguanosine	1.26e-05	MCF7	0.535378	0.1	0.367555
5048		etofylline	1.78e-05	PC3	0.535197	0.09	0.367555
6570	DB11296	Gly-His-Lys	1e-06	PC3	0.535024	0.15	0.367555
2738	DB00481	raloxifene	7.8e-06	HL60	0.534556	0.02	0.367555
4015	DB00376	trihexyphenidyl	1.18e-05	PC3	0.533414	0.09	0.367555
541	DB00317	gefitinib	1e-05	HL60	0.533333	0.08	0.367555
3850		methylbenzethonium chloride	8.6e-06	MCF7	0.533333	0.08	0.367555
5308		trichostatin A	1e-07	MCF7	0.533333	0.07	0.367555
5327	DB09022	benfluorex	1.04e-05	MCF7	0.533333	0.09	0.367555
2773	DB00944	demecarium bromide	5.6e-06	MCF7	0.533025	0.06	0.367555
6518		enilconazole	1.34e-05	MCF7	0.532489	0.12	0.367555
2787	DB00674	galantamine	1.08e-05	MCF7	0.531678	0.12	0.367555
3024	DB00590	doxazosin	7.4e-06	HL60	0.531434	0.09	0.367555
7248	DB00427	triprolidine	1.28e-05	PC3	0.531331	0.24	0.367555
6910		trichostatin A	1e-06	MCF7	0.530656	0.19	0.367555
4508	DB00264	metoprolol	5.8e-06	PC3	0.529047	0.11	0.367555
7381		Prestwick-675	1e-05	PC3	0.528524	0.11	0.367555
2202	DB13044	gossypol	7.8e-06	HL60	0.528286	0.14	0.367555
5096		telenzepine	9e-06	PC3	0.528259	0.14	0.367555
3102	DB13866	etynodiol	1.04e-05	HL60	0.528202	0.15	0.367555
3275		digitoxigenin	1.06e-05	MCF7	0.527505	0.18	0.367555
2123	DB13836	metampicillin	1.04e-05	PC3	0.52742	0.12	0.367555
6065	DB13232	suxibuzone	9.2e-06	MCF7	0.527311	0.15	0.367555
2382	DB13346	bufexamac	1.8e-05	HL60	0.527273	0.13	0.367555
4505		isocorydine	1.18e-05	PC3	0.526657	0.07	0.367555
2504		skimmianine	1.54e-05	HL60	0.525504	0.1	0.367555
5099	DB00424	hyoscyamine	1.38e-05	PC3	0.525474	0.11	0.367555
7280	DB00939	meclofenamic acid	1.18e-05	PC3	0.525071	0.15	0.367555
574		tetraethylenepentamine	0.0001	MCF7	0.524416	0.13	0.367555
2727	DB01061	azlocillin	8.2e-06	HL60	0.524254	0.13	0.367555
365	DB00783	estradiol	1e-07	MCF7	0.524089	0.12	0.367555
6654	DB00563	methotrexate	8.8e-06	PC3	0.523707	0.08	0.367555
1243	DB08059	wortmannin	1e-08	PC3	0.523196	0.2	0.367555
889		5286656	5e-05	MCF7	0.522838	0.15	0.367555
5695	DB15492	eticlopride	1.06e-05	MCF7	0.522706	0.13	0.367555
7507	DB00694	daunorubicin	1e-06	MCF7	0.522453	0.15	0.367555
6723	DB00794	primidone	1.84e-05	PC3	0.522418	0.1	0.367555
6458		(-)-MK-801	1.18e-05	MCF7	0.522378	0.1	0.367555
6018	DB00811	ribavirin	1.64e-05	MCF7	0.521983	0.14	0.367555
6241	DB00704	naltrexone	9.6e-06	MCF7	0.521539	0.21	0.367555
4799	DB00943	zalcitabine	1.9e-05	MCF7	0.520057	0.18	0.367555
6510		scopoletin	2.08e-05	MCF7	0.519998	0.17	0.367555
3563	DB04573	estriol	1.38e-05	MCF7	0.519344	0.11	0.367555
4198	DB01021	trichlormethiazide	1.06e-05	PC3	0.51934	0.12	0.367555
6845		ampyrone	1.96e-05	MCF7	0.518791	0.16	0.367555
2401	DB01039	fenofibrate	1.1e-05	HL60	0.51855	0.18	0.367555
2198	DB09345	pramocaine	1.22e-05	HL60	0.518262	0.19	0.367555
1229	DB00363	clozapine	1e-05	PC3	0.517982	0.11	0.367555
6721	DB00336	nitrofural	2.02e-05	PC3	0.517662	0.06	0.367555
3810	DB08936	chlorcyclizine	1.18e-05	PC3	0.517631	0.08	0.367555
6339	DB06816	pyrvinium	3.4e-06	PC3	0.517566	0.18	0.367555
4669	DB14007	pentetic acid	1.02e-05	PC3	0.51728	0.17	0.367555
445	DB00586	diclofenac	1e-05	PC3	0.517254	0.19	0.367555
2313		6-benzylaminopurine	1.78e-05	MCF7	0.516806	0.19	0.367555
2195		lycorine	1.24e-05	HL60	0.515589	0.2	0.367555
7305	DB01127	econazole	9e-06	PC3	0.515476	0.19	0.367555
6569		5155877	1e-05	PC3	0.515452	0.18	0.367555
3186	DB00613	amodiaquine	8.6e-06	MCF7	0.515103	0.03	0.367555
2083	DB00951	isoniazid	2.92e-05	PC3	0.515054	0.16	0.367555
1241	DB00783	estradiol	1e-08	PC3	0.514587	0.12	0.367555
5743		cicloheximide	1.42e-05	PC3	0.513974	0.07	0.367555
3269	DB13808	mebhydrolin	4.8e-06	MCF7	0.513919	0.15	0.367555
5570		alpha-estradiol	1e-08	MCF7	0.513799	0.21	0.367555
2127	DB00806	pentoxifylline	1.44e-05	PC3	0.513669	0.25	0.367555
3926		pempidine	1.3e-05	MCF7	0.513503	0.11	0.367555
4318	DB01195	flecainide	8.4e-06	PC3	0.513305	0.17	0.367555
2270	DB06694	xylometazoline	1.42e-05	MCF7	0.512924	0.12	0.367555
3466	DB00748	carbinoxamine	9.8e-06	MCF7	0.51276	0.12	0.367555
3868		trichostatin A	1e-07	MCF7	0.512674	0.22	0.367555
6786	DB00748	carbinoxamine	9.8e-06	MCF7	0.51258	0.21	0.367555
7277	DB07402	azapropazone	1.34e-05	PC3	0.512338	0.18	0.367555
6611	DB06698	betahistine	1.72e-05	PC3	0.512269	0.13	0.367555
3979		trichostatin A	1e-07	MCF7	0.512167	0.14	0.367555
4581	DB00804	dicycloverine	1.16e-05	PC3	0.511629	0.12	0.367555
2326		ethisterone	1.28e-05	MCF7	0.511624	0.07	0.367555
3761	DB01195	flecainide	8.4e-06	PC3	0.511528	0.12	0.367555
7491		CP-319743	1e-05	PC3	0.511155	0.13	0.367555
1014		trichostatin A	1e-06	MCF7	0.511117	0.08	0.367555
2623	DB11186	pentoxyverine	7.6e-06	MCF7	0.511044	0.21	0.367555
267	DB01645	genistein	1e-06	MCF7	0.510803	0.09	0.367555
3741		karakoline	1.06e-05	PC3	0.510718	0.13	0.367555
2380	DB01627	lincomycin	9e-06	HL60	0.510417	0.14	0.367555
2689	DB00363	clozapine	1e-05	HL60	0.510394	0.14	0.367555
6683	DB00714	apomorphine	6.4e-06	PC3	0.510384	0.09	0.367555
2549	DB09002	cloperastine	1.1e-05	HL60	0.510367	0.14	0.367555
4773	DB00919	spectinomycin	9.8e-06	MCF7	0.510219	0.16	0.367555
2433	DB01023	felodipine	1.04e-05	HL60	0.509653	0.13	0.367555
3359	DB01203	nadolol	1.3e-05	MCF7	0.509514	0.11	0.367555
4487	DB01242	clomipramine	1.14e-05	PC3	0.509133	0.17	0.367555
1513	DB00543	amoxapine	1.28e-05	MCF7	0.509091	0.18	0.367555
2449	DB08839	serotonin	1.88e-05	HL60	0.509091	0.15	0.367555
4415	DB08985	etilefrine	1.84e-05	MCF7	0.509091	0.13	0.367555
5232	DB01645	genistein	1e-05	MCF7	0.509091	0.13	0.367555
5524	DB00424	hyoscyamine	1.38e-05	MCF7	0.509091	0.21	0.367555
3889		2,6-dimethylpiperidine	2.68e-05	MCF7	0.508748	0.14	0.367555
2734	DB00771	clidinium bromide	9.2e-06	HL60	0.508557	0.14	0.367555
3049	DB14007	pentetic acid	1.02e-05	HL60	0.50848	0.09	0.367555
6302	DB00878	chlorhexidine	8e-06	PC3	0.508214	0.19	0.367555
7143	DB04115	berberine	1.08e-05	PC3	0.508129	0.15	0.367555
918		ikarugamycin	2e-06	MCF7	0.508042	0.15	0.367555
3739		foliosidine	1.3e-05	PC3	0.507754	0.08	0.367555
6828	DB02925	piretanide	1.1e-05	MCF7	0.507397	0.14	0.367555
2524	DB00274	cefmetazole	8.2e-06	HL60	0.50714	0.19	0.367555
6045		methylbenzethonium chloride	8.6e-06	MCF7	0.506977	0.14	0.367555
2406	DB06762	pinacidil	1.64e-05	HL60	0.506701	0.11	0.367555
3640	DB01146	diphenylpyraline	1.26e-05	MCF7	0.506548	0.09	0.367555
5686	DB01172	kanamycin	6.8e-06	MCF7	0.506191	0.16	0.367555
6175	DB02656	LY-294002	1e-07	HL60	0.505995	0.12	0.367555
332		trichostatin A	1e-07	MCF7	0.505884	0.14	0.367555
2050	DB00675	tamoxifen	7e-06	PC3	0.505573	0.14	0.367555
4013	DB00835	brompheniramine	9.2e-06	PC3	0.505543	0.16	0.367555
3526	DB00505	tridihexethyl	1.14e-05	MCF7	0.505256	0.18	0.367555
3909		CP-690334-01	1e-06	MCF7	0.505187	0.21	0.367555
3620	DB00978	lomefloxacin	1.04e-05	MCF7	0.504741	0.09	0.367555
7508		CP-863187	1e-05	MCF7	0.504733	0.18	0.367555
6694	DB00408	loxapine	9e-06	PC3	0.504509	0.2	0.367555
439	DB03940	oxamic acid	0.01	MCF7	0.504343	0.17	0.367555
3360	DB11423	lasalocid	6.6e-06	MCF7	0.503888	0.18	0.367555
1801	DB00868	benzonatate	6.6e-06	PC3	0.50384	0.13	0.367555
6327	DB00461	nabumetone	1.76e-05	PC3	0.503545	0.1	0.367555
2712	DB06821	sulfametoxydiazine	1.42e-05	HL60	0.503476	0.15	0.367555
6822	DB00140	riboflavin	1.06e-05	MCF7	0.503313	0.16	0.367555
1181	DB00313	valproic acid	0.0005	HL60	0.503141	0.25	0.367555
5618	DB01118	amiodarone	5.8e-06	MCF7	0.50303	0.08	0.367555
6363		PF-01378883-00	1e-05	MCF7	0.502515	0.11	0.367555
6081		abamectin	4.8e-06	MCF7	0.50246	0.13	0.367555
5061		denatonium benzoate	9e-06	PC3	0.50213	0.13	0.367555
6058	DB13044	gossypol	7.8e-06	MCF7	0.501713	0.13	0.367555
4417	DB01602	bacampicillin	8e-06	MCF7	0.501458	0.06	0.367555
5508	DB13415	pentetrazol	2.9e-05	MCF7	0.501256	0.19	0.367555
4993	DB00655	estrone	1.48e-05	MCF7	0.500858	0.08	0.367555
3623		6-benzylaminopurine	1.78e-05	MCF7	0.500695	0.18	0.367555
2246	DB00951	isoniazid	2.92e-05	MCF7	0.500432	0.16	0.367555
3555	DB00979	cyclopentolate	1.22e-05	MCF7	0.500132	0.11	0.367555
3504	DB14081	asiaticoside	4.2e-06	MCF7	0.49993	0.16	0.367555
2381	DB04841	flunarizine	8.4e-06	HL60	0.499538	0.21	0.367555
6494	DB13449	proxyphylline	1.68e-05	MCF7	0.499152	0.08	0.367555
5110	DB00355	aztreonam	9.2e-06	PC3	0.49833	0.14	0.367555
2740	DB13331	pyrithyldione	2.4e-05	HL60	0.49752	0.14	0.367555
6796	DB01331	cefoxitin	8.8e-06	MCF7	0.497428	0.21	0.367555
6303	DB00681	amphotericin B	4.4e-06	PC3	0.497311	0.14	0.367555
4789	DB08941	isoxsuprine	1.18e-05	MCF7	0.497031	0.24	0.367555
5984	DB13284	meticrane	1.46e-05	MCF7	0.496923	0.11	0.367555
5854	DB06707	corbadrine	2.18e-05	PC3	0.496269	0.19	0.367555
5223	DB05134	tanespimycin	1e-06	MCF7	0.496179	0.12	0.367555
4095		4-hydroxyphenazone	1.96e-05	PC3	0.495707	0.12	0.367555
1803	DB08991	epirizole	1.7e-05	PC3	0.495075	0.18	0.367555
6925	DB00947	fulvestrant	1e-06	MCF7	0.494986	0.16	0.367555
1480	DB00249	idoxuridine	1.12e-05	MCF7	0.494939	0.21	0.367555
5972	DB01132	pioglitazone	1e-05	MCF7	0.494928	0.18	0.367555
5432	DB01288	fenoterol	1.04e-05	MCF7	0.494195	0.19	0.367555
5253	DB01118	amiodarone	5.8e-06	MCF7	0.494082	0.17	0.367555
3559	DB00432	trifluridine	1.36e-05	MCF7	0.493763	0.15	0.367555
2159	DB09355	sulfabenzamide	1.44e-05	HL60	0.493683	0.2	0.367555
3838		furaltadone	1.1e-05	MCF7	0.493572	0.16	0.367555
3251	DB00395	carisoprodol	1.54e-05	MCF7	0.492988	0.08	0.367555
7206	DB00602	ivermectin	4.6e-06	MCF7	0.492316	0.18	0.367555
4610	DB00997	doxorubicin	6.8e-06	PC3	0.491602	0.15	0.367555
4186	DB00674	galantamine	1.08e-05	PC3	0.491202	0.15	0.367555
4608	DB00195	betaxolol	1.16e-05	PC3	0.49113	0.16	0.367555
5097	DB00832	phensuximide	2.12e-05	PC3	0.48927	0.14	0.367555
6653	DB01393	bezafibrate	1.1e-05	PC3	0.488985	0.17	0.367555
5464		adrenosterone	1.34e-05	MCF7	0.487544	0.16	0.367555
7279		adiphenine	1.14e-05	PC3	0.487466	0.23	0.367555
6479	DB13866	etynodiol	1.04e-05	MCF7	0.487294	0.23	0.367555
7444	DB01667	8-azaguanine	2.62e-05	MCF7	0.487081	0.12	0.367555
3545	DB04839	cyproterone	9.6e-06	MCF7	0.48651	0.17	0.367555
4810		salsolidin	1.64e-05	MCF7	0.486343	0.2	0.367555
6951		trichostatin A	1e-06	MCF7	0.485823	0.11	0.367555
5835	DB00620	triamcinolone	1.02e-05	PC3	0.485497	0.16	0.367555
1942	DB00878	chlorhexidine	8e-06	PC3	0.485198	0.18	0.367555
1649	DB00831	trifluoperazine	1e-05	MCF7	0.484848	0.1	0.367555
3090	DB00488	altretamine	1.9e-05	HL60	0.484315	0.17	0.367555
3046		(+)-isoprenaline	1.1e-05	HL60	0.484226	0.22	0.367555
6749		zaprinast	1.48e-05	PC3	0.483731	0.13	0.367555
6742	DB00411	carbachol	2.18e-05	PC3	0.483125	0.18	0.367555
1511		cotinine	2.26e-05	MCF7	0.482522	0.19	0.367555
3633		0179445-0000	1e-06	MCF7	0.482318	0.13	0.367555
7315	DB00982	isotretinoin	1.34e-05	PC3	0.481892	0.13	0.367555
6434		trichostatin A	1e-06	MCF7	0.481519	0.17	0.367555
7048	DB03444	6-bromoindirubin-3'-oxime	5e-07	PC3	0.480533	0.15	0.367555
6317		coralyne	9.6e-06	PC3	0.480344	0.16	0.367555
3944	DB11461	sulfachlorpyridazine	1.4e-05	MCF7	0.479767	0.14	0.367555
4438	DB00313	valproic acid	0.0002	PC3	0.479556	0.16	0.367555
3398	DB07477	felbinac	1.88e-05	MCF7	0.479371	0.15	0.367555
2546	DB13758	meclofenoxate	1.36e-05	HL60	0.478638	0.14	0.367555
6005	DB00955	netilmicin	2.8e-06	MCF7	0.478608	0.14	0.367555
2739	DB09156	iopromide	5e-06	HL60	0.478444	0.19	0.367555
7294	DB01598	imipenem	1.34e-05	PC3	0.478245	0.15	0.367555
3353	DB02329	carbenoxolone	6.6e-06	MCF7	0.47797	0.18	0.367555
3827		PHA-00745360	1e-06	PC3	0.477145	0.17	0.367555
4140	DB01053	benzathine benzylpenicillin	4.2e-06	MCF7	0.477019	0.19	0.367555
6684	DB00741	hydrocortisone	1.1e-05	PC3	0.476539	0.19	0.367555
316	DB02266	flufenamic acid	1e-05	MCF7	0.476528	0.14	0.367555
6974	DB00313	valproic acid	0.0002	MCF7	0.476368	0.14	0.367555
223	DB02877	TTNPB	1e-07	MCF7	0.475151	0.11	0.367555
384	DB00755	tretinoin	1e-06	MCF7	0.474904	0.14	0.367555
4715		0173570-0000	1e-06	MCF7	0.47471	0.23	0.367555
3642		betonicine	2.52e-05	MCF7	0.474694	0.19	0.367555
6305	DB00585	nizatidine	1.2e-05	PC3	0.474509	0.22	0.367555
3175	DB00568	cinnarizine	1.08e-05	MCF7	0.474439	0.13	0.367555
3237	DB00131	adenosine phosphate	1.1e-05	MCF7	0.474127	0.12	0.367555
3338		tetroquinone	2.1e-05	MCF7	0.473573	0.15	0.367555
4094	DB01245	decamethonium bromide	9.6e-06	PC3	0.473333	0.1	0.367555
5443	DB00409	remoxipride	9.8e-06	MCF7	0.473176	0.23	0.367555
3209	DB12465	ketanserin	7e-06	MCF7	0.47299	0.2	0.367555
4830	DB12582	piperine	1.4e-05	MCF7	0.472804	0.18	0.367555
4841		R-atenolol	1.5e-05	MCF7	0.471905	0.23	0.367555
6476		desoxycortone	1.22e-05	MCF7	0.470786	0.22	0.367555
6798	DB09203	oxedrine	2.4e-05	MCF7	0.47078	0.18	0.367555
5995	DB08991	epirizole	1.7e-05	MCF7	0.470663	0.2	0.367555
3664	DB00400	griseofulvin	1.12e-05	PC3	0.470465	0.15	0.367555
3610	DB00663	flumetasone	9.8e-06	MCF7	0.470267	0.26	0.367555
4793	DB02918	zardaverine	1.5e-05	MCF7	0.469466	0.21	0.367555
5817	DB00568	cinnarizine	1.08e-05	PC3	0.469136	0.22	0.367555
6555	DB00770	alprostadil	1e-05	PC3	0.468703	0.16	0.367555
5773	DB06709	methacholine chloride	2.04e-05	PC3	0.468434	0.24	0.367555
7505		16-phenyltetranorprostaglandin E2	1e-05	MCF7	0.468352	0.21	0.367555
5246		cotinine	2.26e-05	MCF7	0.467582	0.22	0.367555
4642	DB00629	guanabenz	1.38e-05	PC3	0.467564	0.14	0.367555
4603	DB01297	practolol	1.5e-05	PC3	0.467523	0.16	0.367555
6717	DB01069	promethazine	1.24e-05	PC3	0.466889	0.2	0.367555
5804	DB13766	lidoflazine	8.2e-06	PC3	0.466801	0.2	0.367555
1702	DB00732	atracurium besilate	3.2e-06	MCF7	0.466667	0.15	0.367555
5023	DB01188	ciclopirox	1.5e-05	MCF7	0.466667	0.18	0.367555
7550		trichostatin A	1e-06	MCF7	0.466667	0.16	0.367555
3402	DB00794	primidone	1.84e-05	MCF7	0.466433	0.18	0.367555
7353	DB01245	decamethonium bromide	9.6e-06	MCF7	0.466241	0.12	0.367555
5274		pirenperone	1.02e-05	MCF7	0.466188	0.14	0.367555
5532	DB11738	rilmenidine	8.4e-06	MCF7	0.465628	0.17	0.367555
4583	DB00251	terconazole	7.6e-06	PC3	0.465618	0.13	0.367555
6521	DB00811	ribavirin	1.64e-05	MCF7	0.465496	0.12	0.367555
5469	DB13251	octopamine	2.1e-05	MCF7	0.465481	0.14	0.367555
6073	DB11336	kinetin	1.86e-05	MCF7	0.465089	0.17	0.367555
5691	DB14061	hycanthone	1.12e-05	MCF7	0.465083	0.17	0.367555
4252	DB00924	cyclobenzaprine	1.28e-05	PC3	0.464698	0.11	0.367555
3445	DB00194	vidarabine	1.5e-05	MCF7	0.464394	0.09	0.367555
5863	DB04821	nomifensine	1.12e-05	PC3	0.464265	0.2	0.367555
4456	DB00197	troglitazone	1e-05	PC3	0.464182	0.15	0.367555
4774	DB13478	meptazinol	1.48e-05	MCF7	0.463954	0.21	0.367555
6227		chloropyrazine	3.5e-05	MCF7	0.463759	0.15	0.367555
6350	DB00935	oxymetazoline	1.34e-05	PC3	0.461783	0.21	0.367555
7070		AR-A014418	1e-05	PC3	0.461465	0.11	0.367555
2192		helveticoside	7.4e-06	HL60	0.461401	0.16	0.367555
336	DB01054	nitrendipine	1e-05	MCF7	0.460917	0.19	0.367555
2985	DB01077	etidronic acid	1.6e-05	HL60	0.460858	0.17	0.367555
4737		Prestwick-664	8.4e-06	MCF7	0.460651	0.2	0.367555
2490	DB13855	nifuroxazide	1.46e-05	HL60	0.460606	0.22	0.367555
2810		vitexin	9.2e-06	MCF7	0.460606	0.16	0.367555
4435	DB00755	tretinoin	1e-06	PC3	0.460606	0.17	0.367555
4600	DB09403	iocetamic acid	6.6e-06	PC3	0.460606	0.2	0.367555
410	DB00313	valproic acid	0.01	HL60	0.460409	0.2	0.367555
5953	DB05134	tanespimycin	1e-06	MCF7	0.460232	0.09	0.367555
4465	DB00783	estradiol	1e-08	PC3	0.460131	0.2	0.367555
4324		acacetin	1.4e-05	PC3	0.459876	0.19	0.367555
6903		AH-23848	1e-06	MCF7	0.459826	0.28	0.374397
6319	DB08958	hexetidine	1.18e-05	PC3	0.459112	0.16	0.367555
5632	DB00836	loperamide	7.8e-06	MCF7	0.45902	0.26	0.367555
4189	DB01783	calcium pantothenate	8e-06	PC3	0.458918	0.12	0.367555
6057		foliosidine	1.3e-05	MCF7	0.458553	0.21	0.367555
4185	DB01032	probenecid	1.4e-05	PC3	0.458464	0.14	0.367555
5021	DB13340	suloctidil	1.18e-05	MCF7	0.45785	0.19	0.367555
2642	DB00612	bisoprolol	9e-06	MCF7	0.457608	0.28	0.374397
4457	DB00412	rosiglitazone	1e-05	PC3	0.457571	0.15	0.367555
2047	DB00704	naltrexone	9.6e-06	PC3	0.456865	0.1	0.367555
7522		CP-645525-01	1e-05	MCF7	0.4568	0.26	0.367555
7546		16-phenyltetranorprostaglandin E2	1e-05	PC3	0.456023	0.23	0.367555
3335	DB13744	piromidic acid	1.38e-05	MCF7	0.454507	0.21	0.367555
6495		atropine methonitrate	1.1e-05	MCF7	0.454087	0.13	0.367555
7330	DB07814	gibberellic acid	1.16e-05	MCF7	0.454001	0.17	0.367555
5424	DB01329	cefoperazone	5.8e-06	MCF7	0.453825	0.17	0.367555
4264	DB04216	quercetin	1.18e-05	PC3	0.453129	0.2	0.367555
3732		PNU-0230031	1e-05	PC3	0.452005	0.2	0.367555
4204		epitiostanol	1.3e-05	PC3	0.451817	0.14	0.367555
2800		protoveratrine A	5e-06	MCF7	0.451023	0.14	0.367555
5630	DB00363	clozapine	1.22e-05	MCF7	0.451021	0.13	0.367555
1632	DB00877	sirolimus	1e-07	MCF7	0.450951	0.09	0.367555
4466	DB00877	sirolimus	1e-07	PC3	0.450839	0.15	0.367555
4199	DB01618	molindone	1.28e-05	PC3	0.450459	0.12	0.367555
3287	DB00396	progesterone	1.28e-05	MCF7	0.450419	0.15	0.367555
2170		solasodine	9.6e-06	HL60	0.450163	0.23	0.367555
2797		seneciphylline	1.2e-05	MCF7	0.449662	0.18	0.367555
7307	DB00384	triamterene	1.58e-05	PC3	0.449089	0.17	0.367555
6093	DB11148	butamben	2.06e-05	MCF7	0.448622	0.24	0.367555
4223	DB00646	nystatin	4.4e-06	PC3	0.448159	0.16	0.367555
4297		karakoline	1.06e-05	PC3	0.448046	0.17	0.367555
4423	DB00512	vancomycin	2.6e-06	MCF7	0.447939	0.18	0.367555
1784		aconitine	6.2e-06	HL60	0.44791	0.12	0.367555
5964	DB00947	fulvestrant	1e-06	MCF7	0.447773	0.18	0.367555
5668		dimethadione	3.1e-05	MCF7	0.446917	0.14	0.367555
5671	DB00997	doxorubicin	6.8e-06	MCF7	0.446504	0.2	0.367555
5967		PF-00875133-00	1e-05	MCF7	0.446061	0.15	0.367555
6156	DB09203	oxedrine	2.4e-05	HL60	0.445509	0.19	0.367555
3034	DB06774	capsaicin	1.3e-05	HL60	0.445297	0.18	0.367555
575	DB06778	copper sulfate	0.0001	MCF7	0.445273	0.18	0.367555
3970	DB00808	indapamide	1.06e-05	MCF7	0.444756	0.23	0.367555
2699	DB02656	LY-294002	1e-05	HL60	0.444319	0.12	0.367555
4206		pepstatin	5.8e-06	PC3	0.444081	0.16	0.367555
1485	DB08941	isoxsuprine	1.18e-05	MCF7	0.443774	0.13	0.367555
1830	DB01075	diphenhydramine	1.38e-05	PC3	0.443476	0.23	0.367555
7495	DB00947	fulvestrant	1e-06	PC3	0.443245	0.18	0.367555
5629	DB14007	pentetic acid	1.02e-05	MCF7	0.442794	0.19	0.367555
7528	DB01132	pioglitazone	1e-05	PC3	0.442747	0.17	0.367555
2721		trichostatin A	1e-07	HL60	0.442424	0.14	0.367555
4202		trimethylcolchicinic acid	1.16e-05	PC3	0.441926	0.12	0.367555
4727	DB00253	medrysone	1.16e-05	MCF7	0.441284	0.23	0.367555
5777		spiperone	1.02e-05	PC3	0.44123	0.23	0.367555
2274	DB00423	methocarbamol	1.66e-05	MCF7	0.441035	0.19	0.367555
2984	DB00279	liothyronine	6.2e-06	HL60	0.440779	0.14	0.367555
4098	DB00614	furazolidone	1.78e-05	PC3	0.440299	0.14	0.367555
4523	DB00291	chlorambucil	1.32e-05	PC3	0.439945	0.16	0.367555
3569		tropine	2.84e-05	MCF7	0.439852	0.11	0.367555
4545	DB00754	ethotoin	1.96e-05	PC3	0.439748	0.33	0.416253
436	DB08162	fasudil	1e-05	PC3	0.439361	0.11	0.367555
3966		0317956-0000	1e-05	MCF7	0.439015	0.21	0.367555
2255	DB13415	pentetrazol	2.9e-05	MCF7	0.438926	0.13	0.367555
2523		trichostatin A	1e-07	HL60	0.438892	0.16	0.367555
3860	DB00692	phentolamine	1.26e-05	MCF7	0.438778	0.21	0.367555
7266		Prestwick-972	2.26e-05	PC3	0.438496	0.16	0.367555
6670	DB01194	brinzolamide	1.04e-05	PC3	0.437197	0.29	0.378801
4500		epivincamine	1.12e-05	PC3	0.437143	0.2	0.367555
5083	DB06793	levopropoxyphene	7.4e-06	PC3	0.437034	0.12	0.367555
6067		ricinine	2.44e-05	MCF7	0.436563	0.17	0.367555
4220	DB12831	gabexate	9.6e-06	PC3	0.436364	0.19	0.367555
882		ionomycin	2e-06	MCF7	0.435793	0.19	0.367555
5943	DB11457	rotenone	1e-06	MCF7	0.4357	0.24	0.367555
3043	DB00627	nicotinic acid	3.24e-05	HL60	0.435225	0.17	0.367555
4000		amiprilose	1.18e-05	PC3	0.43493	0.19	0.367555
6686	DB01144	diclofenamide	1.32e-05	PC3	0.4347	0.21	0.367555
3663	DB13025	tiapride	1.1e-05	PC3	0.432747	0.24	0.367555
4410	DB01197	captopril	1.72e-05	MCF7	0.431701	0.2	0.367555
4225		carcinine	2.2e-05	PC3	0.431517	0.1	0.367555
2646	DB13511	clebopride	8.2e-06	MCF7	0.430866	0.23	0.367555
4107		cinchonine	1.36e-05	MCF7	0.429073	0.24	0.367555
2795		palmatine	1.04e-05	MCF7	0.428776	0.25	0.367555
6481	DB00665	nilutamide	1.26e-05	MCF7	0.427452	0.18	0.367555
2619		thioguanosine	1.26e-05	MCF7	0.42719	0.2	0.367555
4759		myosmine	2.74e-05	MCF7	0.426658	0.21	0.367555
4296	DB13044	gossypol	7.8e-06	PC3	0.425165	0.22	0.367555
2445	DB00485	dicloxacillin	8.2e-06	HL60	0.425029	0.21	0.367555
333	DB00586	diclofenac	1e-05	MCF7	0.424726	0.23	0.367555
5518	DB00564	carbamazepine	1.7e-05	MCF7	0.424649	0.18	0.367555
6657		(-)-MK-801	1.18e-05	PC3	0.424583	0.15	0.367555
2698	DB00947	fulvestrant	1e-08	HL60	0.423996	0.24	0.367555
3890		beta-escin	3.2e-06	MCF7	0.422588	0.19	0.367555
2265	DB01626	pargyline	2.04e-05	MCF7	0.42194	0.29	0.378801
5965	DB02656	LY-294002	1e-05	MCF7	0.421831	0.21	0.367555
4405	DB00804	dicycloverine	1.16e-05	MCF7	0.421651	0.16	0.367555
6734		metanephrine	1.72e-05	PC3	0.421507	0.14	0.367555
4019	DB01024	mycophenolic acid	1.24e-05	PC3	0.420907	0.22	0.367555
2526	DB01112	cefuroxime	9e-06	HL60	0.420411	0.19	0.367555
7069		0198306-0000	1e-05	PC3	0.420309	0.19	0.367555
6016	DB13407	nifenazone	1.3e-05	MCF7	0.4203	0.16	0.367555
4251	DB01435	phenazone	2.12e-05	PC3	0.420283	0.21	0.367555
3018	DB00747	scopolamine	1.18e-05	HL60	0.420279	0.2	0.367555
2672		trichostatin A	1e-07	HL60	0.419942	0.21	0.367555
6641		khellin	1.54e-05	PC3	0.419109	0.18	0.367555
5257	DB00263	sulfafurazole	1.5e-05	MCF7	0.418619	0.18	0.367555
3692		PNU-0251126	1e-06	PC3	0.418182	0.29	0.378801
4196	DB12867	benperidol	1.04e-05	PC3	0.417597	0.23	0.367555
3513		betulin	9e-06	MCF7	0.416995	0.13	0.367555
3801	DB01173	orphenadrine	1.3e-05	PC3	0.416652	0.16	0.367555
4740	DB01581	sulfamerazine	1.52e-05	MCF7	0.415563	0.18	0.367555
3217	DB00397	phenylpropanolamine	2.14e-05	MCF7	0.415554	0.22	0.367555
5888	DB00244	mesalazine	2.62e-05	PC3	0.415537	0.25	0.367555
4633	DB13399	terguride	8.8e-06	PC3	0.415297	0.21	0.367555
6562		16,16-dimethylprostaglandin E2	1e-05	PC3	0.415087	0.19	0.367555
5049	DB00328	indometacin	1.12e-05	PC3	0.414648	0.17	0.367555
5963		H-7	0.0001	MCF7	0.414503	0.2	0.367555
2158	DB00376	trihexyphenidyl	1.18e-05	HL60	0.414455	0.25	0.367555
5752	DB00240	alclometasone	7.6e-06	PC3	0.413903	0.22	0.367555
4598	DB00512	vancomycin	2.6e-06	PC3	0.413788	0.25	0.367555
6186	DB02656	LY-294002	1e-05	HL60	0.413683	0.23	0.367555
3624	DB00750	prilocaine	1.56e-05	MCF7	0.413122	0.16	0.367555
222		tomelukast	1e-06	MCF7	0.411605	0.17	0.367555
2550	DB13773	sulfamethoxypyridazine	1.42e-05	HL60	0.411148	0.22	0.367555
2708	DB00473	hexylcaine	1.34e-05	HL60	0.4109	0.28	0.374397
5080		lobelanidine	1.06e-05	PC3	0.410546	0.24	0.367555
6629		arcaine	1.48e-05	PC3	0.410487	0.23	0.367555
1534	DB01321	josamycin	4.8e-06	MCF7	0.410252	0.21	0.367555
6358	DB00788	naproxen	1.74e-05	PC3	0.410074	0.23	0.367555
4530	DB00991	oxaprozin	1.36e-05	PC3	0.40999	0.26	0.367555
3045	DB07118	hymecromone	2.28e-05	HL60	0.409305	0.17	0.367555
3261		lysergol	1.58e-05	MCF7	0.408131	0.21	0.367555
2742		sulfamonomethoxine	1.42e-05	HL60	0.407396	0.22	0.367555
6035		heliotrine	1.28e-05	MCF7	0.407391	0.29	0.378801
3609	DB13773	sulfamethoxypyridazine	1.42e-05	MCF7	0.406775	0.2	0.367555
7377	DB00440	trimethoprim	1.38e-05	PC3	0.406627	0.23	0.367555
6007		Trolox C	1.6e-05	MCF7	0.405386	0.24	0.367555
2493	DB12604	sisomicin	2.8e-06	HL60	0.40476	0.23	0.367555
4090	DB02375	myricetin	1.26e-05	PC3	0.404316	0.2	0.367555
3522	DB14075	imidurea	1.04e-05	MCF7	0.403491	0.21	0.367555
4091	DB01600	tiaprofenic acid	1.54e-05	PC3	0.403082	0.22	0.367555
2564	DB01327	cefazolin	8.4e-06	HL60	0.402455	0.21	0.367555
6482	DB12783	benserazide	1.36e-05	MCF7	0.402323	0.13	0.367555
3826		CP-690334-01	1e-06	PC3	0.402128	0.2	0.367555
3199	DB01408	bambuterol	1e-05	MCF7	0.401566	0.19	0.367555
2311	DB01275	hydralazine	2.04e-05	MCF7	0.401537	0.22	0.367555
7283	DB01059	norfloxacin	1.26e-05	PC3	0.401227	0.19	0.367555
4845	DB01087	primaquine	8.8e-06	MCF7	0.401051	0.17	0.367555
4628	DB00265	crotamiton	1.96e-05	PC3	0.400252	0.23	0.367555
4128	DB00928	azacitidine	1.64e-05	MCF7	0.400044	0.24	0.367555
7050	DB01206	lomustine	0.0001	PC3	0.399666	0.21	0.367555
4733	DB13773	sulfamethoxypyridazine	1.42e-05	MCF7	0.39929	0.16	0.367555
2544	DB00253	medrysone	1.16e-05	HL60	0.399222	0.3	0.38632
3825		CP-320650-01	1e-06	PC3	0.398678	0.24	0.367555
3571		(-)-isoprenaline	1.62e-05	MCF7	0.398315	0.18	0.367555
3817		alpha-ergocryptine	7e-06	PC3	0.398104	0.22	0.367555
6710	DB00343	diltiazem	8.8e-06	PC3	0.398039	0.17	0.367555
6763	DB00665	nilutamide	1.26e-05	PC3	0.397886	0.25	0.367555
3333		Prestwick-864	3.5e-05	MCF7	0.396798	0.18	0.367555
5271	DB00624	testosterone	1.16e-05	MCF7	0.395884	0.22	0.367555
2741	DB13242	bucladesine	7.8e-06	HL60	0.395175	0.15	0.367555
5426	DB09282	molsidomine	1.66e-05	MCF7	0.395008	0.22	0.367555
7397		alexidine	6.8e-06	PC3	0.394191	0.22	0.367555
3061	DB07477	felbinac	1.88e-05	HL60	0.393801	0.25	0.367555
4772	DB00674	galantamine	1.08e-05	MCF7	0.393557	0.22	0.367555
4077	DB00223	diflorasone	8e-06	PC3	0.393148	0.18	0.367555
4461	DB00623	fluphenazine	1e-05	PC3	0.392502	0.21	0.367555
5957	DB14057	valinomycin	1e-07	MCF7	0.392478	0.29	0.378801
2310	DB00978	lomefloxacin	1.04e-05	MCF7	0.392323	0.21	0.367555
3798		Prestwick-1100	9e-06	PC3	0.391506	0.28	0.374397
6368		PF-01378883-00	1e-05	PC3	0.390218	0.25	0.367555
2405	DB01017	minocycline	8e-06	HL60	0.3901	0.22	0.367555
4228	DB00277	theophylline	2.02e-05	PC3	0.388626	0.27	0.369863
3345	DB08951	indoprofen	1.42e-05	MCF7	0.388375	0.18	0.367555
2999		tetroquinone	2.1e-05	HL60	0.38755	0.21	0.367555
3065	DB00794	primidone	1.84e-05	HL60	0.387351	0.14	0.367555
6438		5707885	5e-05	PC3	0.387333	0.22	0.367555
3584	DB00244	mesalazine	2.62e-05	MCF7	0.38597	0.22	0.367555
5844	DB00158	folic acid	9e-06	PC3	0.385534	0.19	0.367555
5910	DB00783	estradiol	1e-08	PC3	0.385477	0.22	0.367555
3639		etiocholanolone	1.38e-05	MCF7	0.385053	0.23	0.367555
4497	DB11750	clobetasol	8.6e-06	PC3	0.384844	0.22	0.367555
6876		BAS-012416453	3.8e-05	PC3	0.382321	0.22	0.367555
6713	DB00600	monobenzone	2e-05	PC3	0.382159	0.23	0.367555
6605		lactobionic acid	1.12e-05	PC3	0.381497	0.19	0.367555
4064	DB04652	corticosterone	1.16e-05	PC3	0.381365	0.22	0.367555
434	DB06819	sodium phenylbutyrate	0.001	PC3	0.380695	0.17	0.367555
6015	DB13574	heptaminol	2.2e-05	MCF7	0.379738	0.24	0.367555
6601		retrorsine	1.14e-05	PC3	0.379594	0.33	0.416253
6724	DB00390	digoxin	5.2e-06	PC3	0.376969	0.23	0.367555
6702	DB00627	nicotinic acid	3.24e-05	PC3	0.376639	0.22	0.367555
4403	DB00394	beclometasone	7.6e-06	MCF7	0.376256	0.18	0.367555
3114		trichostatin A	1e-07	HL60	0.376045	0.28	0.374397
2240	DB01418	acenocoumarol	1.14e-05	MCF7	0.375758	0.15	0.367555
3255	DB01578	metrizamide	5e-06	MCF7	0.375758	0.27	0.369863
4796	DB00803	colistin	3e-06	MCF7	0.375758	0.2	0.367555
4179	DB00770	alprostadil	1.12e-05	MCF7	0.37509	0.33	0.416253
4113		Prestwick-864	3.5e-05	MCF7	0.374675	0.25	0.367555
6869		STOCK1N-28457	2e-05	MCF7	0.374453	0.22	0.367555
5421	DB00393	nimodipine	9.6e-06	MCF7	0.373549	0.28	0.374397
6863		PF-00562151-00	1e-05	PC3	0.373052	0.23	0.367555
5911	DB14057	valinomycin	1e-07	PC3	0.373014	0.18	0.367555
4420	DB01421	paromomycin	5.6e-06	MCF7	0.370914	0.22	0.367555
5949		AG-013608	1e-05	PC3	0.370702	0.22	0.367555
5573	DB12442	alvespimycin	1e-07	MCF7	0.370675	0.29	0.378801
3535	DB01605	pivmecillinam	8.4e-06	MCF7	0.369855	0.19	0.367555
5249	DB13248	phthalylsulfathiazole	1e-05	MCF7	0.369697	0.25	0.367555
4172		Prestwick-691	1.38e-05	MCF7	0.369527	0.19	0.367555
6703	DB01055	mimosine	2.02e-05	PC3	0.368733	0.25	0.367555
4087		solanine	4.6e-06	PC3	0.367637	0.21	0.367555
5749	DB00981	physostigmine	6.2e-06	PC3	0.366148	0.18	0.367555
3574		piperacetazine	9.8e-06	MCF7	0.365572	0.22	0.367555
268	DB01645	genistein	1e-06	MCF7	0.365407	0.26	0.367555
2566		trichostatin A	1e-07	HL60	0.365291	0.25	0.367555
2561	DB00266	dicoumarol	1.18e-05	HL60	0.365087	0.27	0.369863
5571	DB00755	tretinoin	1e-06	MCF7	0.364405	0.27	0.369863
4152	DB01049	co-dergocrine mesilate	6.4e-06	MCF7	0.363909	0.2	0.367555
6633	DB00227	lovastatin	9.8e-06	PC3	0.360853	0.24	0.367555
2145	DB13393	emetine	7.2e-06	HL60	0.359336	0.27	0.369863
4001	DB00330	ethambutol	1.44e-05	PC3	0.359315	0.23	0.367555
2269	DB08979	fenspiride	1.34e-05	MCF7	0.358974	0.21	0.367555
6832	DB01614	acepromazine	9e-06	MCF7	0.35878	0.29	0.378801
6769	DB06764	tetryzoline	1.68e-05	MCF7	0.354637	0.2	0.367555
7526		15(S)-15-methylprostaglandin E2	1e-05	PC3	0.35414	0.21	0.367555
6716	DB02691	glycocholic acid	8.6e-06	PC3	0.350218	0.27	0.369863
5481	DB14075	imidurea	1.04e-05	MCF7	0.34986	0.16	0.367555
3524	DB00955	netilmicin	2.8e-06	MCF7	0.34755	0.22	0.367555
7299	DB06704	iobenguane	1.08e-05	PC3	0.347371	0.21	0.367555
252	DB00482	celecoxib	1e-05	MCF7	0.347129	0.3	0.38632
6635		Prestwick-857	1.22e-05	PC3	0.346745	0.22	0.367555
5840	DB00951	isoniazid	2.92e-05	PC3	0.346652	0.22	0.367555
6090	DB11464	sulfaquinoxaline	1.24e-05	MCF7	0.345455	0.21	0.367555
6739		hemicholinium	7e-06	PC3	0.344498	0.31	0.394698
4258	DB13510	buflomedil	1.16e-05	PC3	0.342732	0.22	0.367555
4084	DB09242	moxonidine	1.66e-05	PC3	0.338783	0.2	0.367555
6692	DB01239	chlorprothixene	1.14e-05	PC3	0.335626	0.28	0.374397
4157	DB00550	propylthiouracil	2.34e-05	MCF7	0.335279	0.24	0.367555
5117	DB00887	bumetanide	1.1e-05	PC3	0.333915	0.24	0.367555
4114	DB00176	fluvoxamine	9.2e-06	MCF7	0.333001	0.22	0.367555
6669	DB12319	benzbromarone	9.4e-06	PC3	0.331664	0.25	0.367555
6613	DB01412	theobromine	2.22e-05	PC3	0.322729	0.22	0.367555
6687	DB13588	naftidrofuryl	8.4e-06	PC3	0.320357	0.29	0.378801
3975		ethisterone	1.28e-05	MCF7	0.317639	0.27	0.369863
6075		delsoline	8.6e-06	MCF7	0.315532	0.19	0.367555
4495		(-)-isoprenaline	1.62e-05	PC3	0.312361	0.24	0.367555
3695		atractyloside	5e-06	PC3	0.312121	0.28	0.374397
4507		ampyrone	1.96e-05	PC3	0.310884	0.27	0.369863
5734	DB00979	cyclopentolate	1.22e-05	PC3	0.309585	0.18	0.367555
4078		tetroquinone	2.1e-05	PC3	0.308973	0.22	0.367555
5789	DB13718	hydroquinine	9.4e-06	PC3	0.261574	0.23	0.367555
1	DB00331	metformin	1e-05	MCF7	0	0.21	0.367555
2	DB00331	metformin	1e-05	MCF7	0	0.2	0.367555
4	DB00331	metformin	0.001	MCF7	0	0.19	0.367555
21	DB00914	phenformin	1e-05	MCF7	0	0.17	0.367555
61	DB00331	metformin	1e-05	MCF7	0	0.19	0.367555
121	DB00783	estradiol	1e-08	MCF7	0	0.2	0.367555
122		alpha-estradiol	1e-08	MCF7	0	0.11	0.367555
123	DB01234	dexamethasone	1e-06	MCF7	0	0.19	0.367555
124	DB00244	mesalazine	0.0001	MCF7	0	0.11	0.367555
141	DB00672	chlorpropamide	0.0001	MCF7	0	0.14	0.367555
143	DB00675	tamoxifen	1e-06	MCF7	0	0.2	0.367555
144	DB00672	chlorpropamide	0.0001	MCF7	0	0.13	0.367555
161	DB00661	verapamil	1e-05	MCF7	0	0.08	0.367555
164	DB14063	dexverapamil	1e-05	MCF7	0	0.1	0.367555
165	DB00990	exemestane	1e-08	MCF7	0	0.1	0.367555
166	DB00533	rofecoxib	1e-05	MCF7	0	0.06	0.367555
167	DB00321	amitriptyline	1e-06	MCF7	0	0.2	0.367555
168	DB00605	sulindac	0.0001	MCF7	0	0.15	0.367555
202	DB00481	raloxifene	1e-07	MCF7	0	0.15	0.367555
203	DB00179	nordihydroguaiaretic acid	1e-06	MCF7	0	0.29	0.378801
205	DB00533	rofecoxib	1e-05	MCF7	0	0.28	0.374397
206	DB00482	celecoxib	1e-05	MCF7	0	0.15	0.367555
207		LM-1685	1e-05	MCF7	0	0.19	0.367555
208		SC-58125	1e-05	MCF7	0	0.22	0.367555
221	DB05134	tanespimycin	1e-07	MCF7	0	0.3	0.38632
253		LM-1685	1e-05	MCF7	0	0.2	0.367555
254		SC-58125	1e-05	MCF7	0	0.23	0.367555
255	DB01234	dexamethasone	1e-06	MCF7	0	0.29	0.378801
256	DB00533	rofecoxib	1e-05	MCF7	0	0.27	0.369863
258	DB02656	LY-294002	1e-05	MCF7	0	0.3	0.38632
261	DB00091	ciclosporin	1e-06	MCF7	0	0.22	0.367555
262	DB00328	indometacin	2e-05	MCF7	0	0.27	0.369863
263	DB00636	clofibrate	0.00015	MCF7	0	0.25	0.367555
264		MK-886	1e-06	MCF7	0	0.25	0.367555
265	DB00860	prednisolone	1e-06	MCF7	0	0.42	0.526294
281	DB00687	fludrocortisone	1e-06	MCF7	0	0.15	0.367555
282	DB00687	fludrocortisone	1e-06	MCF7	0	0.25	0.367555
283	DB04216	quercetin	1e-06	MCF7	0	0.2	0.367555
284	DB00864	tacrolimus	1e-06	MCF7	0	0.23	0.367555
307	DB00605	sulindac	5e-05	MCF7	0	0.2	0.367555
311	DB04331	monastrol	0.0001	MCF7	0	0.3	0.38632
312	DB02010	staurosporine	1e-06	MCF7	0	0.24	0.367555
313		NU-1025	0.0001	MCF7	0	0.27	0.369863
314	DB06246	exisulind	5e-05	MCF7	0	0.26	0.367555
315	DB00945	acetylsalicylic acid	0.0001	MCF7	0	0.18	0.367555
317		N-phenylanthranilic acid	1e-05	MCF7	0	0.32	0.405316
318	DB02656	LY-294002	1e-05	MCF7	0	0.2	0.367555
326	DB00877	sirolimus	1e-07	MCF7	0	0.24	0.367555
327		arachidonyltrifluoromethane	1e-05	MCF7	0	0.29	0.378801
328	DB02656	LY-294002	1e-05	MCF7	0	0.22	0.367555
334	DB01033	mercaptopurine	0.0001	MCF7	0	0.22	0.367555
335	DB01115	nifedipine	1e-05	MCF7	0	0.23	0.367555
337	DB01023	felodipine	1e-05	MCF7	0	0.27	0.369863
344	DB08831	2-deoxy-D-glucose	0.01	MCF7	0	0.28	0.374397
345	DB00313	valproic acid	0.01	MCF7	0	0.38	0.476367
347	DB00313	valproic acid	0.0005	MCF7	0	0.2	0.367555
361	DB02656	LY-294002	1e-05	HL60	0	0.21	0.367555
362	DB00877	sirolimus	1e-07	HL60	0	0.16	0.367555
363	DB06819	sodium phenylbutyrate	0.0001	HL60	0	0.24	0.367555
367	DB00947	fulvestrant	1e-06	MCF7	0	0.24	0.367555
368		pirinixic acid	0.0001	MCF7	0	0.28	0.374397
369	DB00412	rosiglitazone	1e-05	HL60	0	0.23	0.367555
370	DB00197	troglitazone	1e-05	HL60	0	0.16	0.367555
371	DB00533	rofecoxib	1e-05	HL60	0	0.12	0.367555
373	DB00783	estradiol	1e-08	ssMCF7	0	0.23	0.367555
376	DB00481	raloxifene	1e-07	ssMCF7	0	0.23	0.367555
377	DB00482	celecoxib	1e-05	MCF7	0	0.17	0.367555
378	DB00864	tacrolimus	1e-06	MCF7	0	0.15	0.367555
379	DB14206	cobalt chloride	0.0001	MCF7	0	0.22	0.367555
380	DB00675	tamoxifen	1e-06	MCF7	0	0.18	0.367555
387	DB00783	estradiol	1e-08	HL60	0	0.3	0.38632
389	DB08059	wortmannin	1e-08	HL60	0	0.16	0.367555
390	DB00755	tretinoin	1e-06	HL60	0	0.31	0.394698
402	DB00877	sirolimus	1e-07	ssMCF7	0	0.27	0.369863
403		alpha-estradiol	1e-08	ssMCF7	0	0.18	0.367555
404	DB08059	wortmannin	1e-08	ssMCF7	0	0.22	0.367555
405		tetraethylenepentamine	1e-05	MCF7	0	0.31	0.394698
408	DB06819	sodium phenylbutyrate	0.001	MCF7	0	0.21	0.367555
412		tetraethylenepentamine	0.0001	HL60	0	0.15	0.367555
415	DB00179	nordihydroguaiaretic acid	1e-06	ssMCF7	0	0.33	0.416253
417	DB00679	thioridazine	1e-05	MCF7	0	0.22	0.367555
418	DB00502	haloperidol	1e-05	MCF7	0	0.13	0.367555
419	DB00477	chlorpromazine	1e-05	MCF7	0	0.2	0.367555
423	DB02010	staurosporine	1e-07	MCF7	0	0.15	0.367555
424	DB02656	LY-294002	1e-07	MCF7	0	0.19	0.367555
425	DB02010	staurosporine	1e-08	MCF7	0	0.21	0.367555
426	DB00477	chlorpromazine	1e-06	MCF7	0	0.25	0.367555
427	DB01088	iloprost	1e-06	MCF7	0	0.16	0.367555
429	DB02656	LY-294002	1e-05	PC3	0	0.25	0.367555
430	DB00412	rosiglitazone	1e-05	PC3	0	0.26	0.367555
431	DB00197	troglitazone	1e-05	PC3	0	0.27	0.369863
433	DB00313	valproic acid	0.001	PC3	0	0.2	0.367555
437	DB01051	novobiocin	0.0001	MCF7	0	0.27	0.369863
442		oligomycin	1e-06	MCF7	0	0.3	0.38632
443	DB04557	arachidonic acid	1e-05	MCF7	0	0.16	0.367555
444	DB00636	clofibrate	0.0001	MCF7	0	0.21	0.367555
446		15-delta prostaglandin J2	1e-05	PC3	0	0.23	0.367555
451	DB02877	TTNPB	1e-07	PC3	0	0.3	0.38632
452	DB00328	indometacin	0.0001	PC3	0	0.2	0.367555
453	DB00328	indometacin	0.0001	MCF7	0	0.18	0.367555
455	DB00433	prochlorperazine	1e-05	MCF7	0	0.22	0.367555
458	DB00313	valproic acid	0.001	PC3	0	0.15	0.367555
459	DB06778	copper sulfate	0.0001	PC3	0	0.17	0.367555
460	DB00746	deferoxamine	0.0001	PC3	0	0.13	0.367555
461	DB02656	LY-294002	1e-05	PC3	0	0.23	0.367555
464		pirinixic acid	0.0001	PC3	0	0.23	0.367555
481		pirinixic acid	0.0001	PC3	0	0.17	0.367555
483	DB00619	imatinib	1e-05	PC3	0	0.34	0.427805
484		monorden	1e-07	PC3	0	0.29	0.378801
487		pirinixic acid	0.0001	MCF7	0	0.28	0.374397
490	DB00623	fluphenazine	1e-05	MCF7	0	0.19	0.367555
491	DB00988	dopamine	1e-06	MCF7	0	0.21	0.367555
492	DB00502	haloperidol	1e-05	MCF7	0	0.25	0.367555
493		monorden	1e-07	SKMEL5	0	0.2	0.367555
494	DB00623	fluphenazine	1e-05	SKMEL5	0	0.26	0.367555
495		pirinixic acid	0.0001	SKMEL5	0	0.22	0.367555
498		tetraethylenepentamine	0.0001	ssMCF7	0	0.25	0.367555
499	DB01051	novobiocin	0.0001	ssMCF7	0	0.33	0.416253
502	DB06819	sodium phenylbutyrate	0.0002	SKMEL5	0	0.26	0.367555
506	DB08059	wortmannin	1e-08	SKMEL5	0	0.28	0.374397
508	DB02010	staurosporine	1e-08	SKMEL5	0	0.26	0.367555
542		SC-58125	1e-05	HL60	0	0.25	0.367555
543		1,5-isoquinolinediol	0.0001	HL60	0	0.2	0.367555
544		monorden	1e-07	HL60	0	0.25	0.367555
573	DB00746	deferoxamine	0.0001	MCF7	0	0.26	0.367555
578		4,5-dianilinophthalimide	1e-05	PC3	0	0.09	0.367555
579	DB07795	fisetin	5e-05	PC3	0	0.07	0.367555
583		HNMPA-(AM)3	5e-06	PC3	0	0.27	0.369863
584		dimethyloxalylglycine	0.001	PC3	0	0.23	0.367555
590		3-aminobenzamide	0.01	MCF7	0	0.17	0.367555
592	DB01599	probucol	1e-05	MCF7	0	0.17	0.367555
595	DB02709	resveratrol	5e-05	MCF7	0	0.21	0.367555
596	DB04331	monastrol	0.0001	MCF7	0	0.25	0.367555
601		MK-886	1e-06	MCF7	0	0.27	0.369863
602	DB00091	ciclosporin	1e-06	MCF7	0	0.17	0.367555
603	DB01115	nifedipine	1e-05	MCF7	0	0.24	0.367555
604	DB04557	arachidonic acid	1e-05	MCF7	0	0.23	0.367555
610	DB04331	monastrol	0.0001	MCF7	0	0.15	0.367555
614	DB04331	monastrol	2e-05	MCF7	0	0	0
622	DB02709	resveratrol	5e-05	MCF7	0	0.04	0.367555
624		4,5-dianilinophthalimide	1e-05	MCF7	0	0.03	0.367555
629	DB00313	valproic acid	0.001	SKMEL5	0	0.09	0.367555
630	DB01394	colchicine	1e-06	SKMEL5	0	0.07	0.367555
631	DB12783	benserazide	1e-05	SKMEL5	0	0.09	0.367555
632	DB01051	novobiocin	0.0001	SKMEL5	0	0.12	0.367555
641	DB12783	benserazide	1e-05	MCF7	0	0.19	0.367555
642	DB00352	tioguanine	1e-05	MCF7	0	0.21	0.367555
643		W-13	1e-05	MCF7	0	0.19	0.367555
644	DB01394	colchicine	1e-07	MCF7	0	0.24	0.367555
661		splitomicin	2e-05	PC3	0	0.13	0.367555
662	DB02709	resveratrol	5e-05	PC3	0	0.26	0.367555
663		U0125	1e-06	PC3	0	0.28	0.374397
664		docosahexaenoic acid ethyl ester	0.0001	PC3	0	0.22	0.367555
665	DB00783	estradiol	1e-08	PC3	0	0.29	0.378801
666		butirosin	1e-05	PC3	0	0.18	0.367555
668	DB04331	monastrol	0.0001	PC3	0	0.17	0.367555
702		alpha-estradiol	1e-08	PC3	0	0.15	0.367555
703	DB01645	genistein	1e-05	PC3	0	0.18	0.367555
704	DB00947	fulvestrant	1e-06	PC3	0	0.15	0.367555
762		alpha-estradiol	1e-08	MCF7	0	0.16	0.367555
782	DB00783	estradiol	1e-08	HL60	0	0.09	0.367555
783	DB02587	colforsin	5e-05	HL60	0	0.05	0.367555
828		5252917	1.4e-05	MCF7	0	0.13	0.367555
833		5255229	1.3e-05	MCF7	0	0.11	0.367555
834		5211181	1.2e-05	MCF7	0	0.11	0.367555
835	DB00564	carbamazepine	1e-07	MCF7	0	0.19	0.367555
837		blebbistatin	1.7e-05	MCF7	0	0.14	0.367555
838		5248896	1.1e-05	MCF7	0	0.11	0.367555
841	DB02709	resveratrol	1e-05	MCF7	0	0.2	0.367555
842	DB13242	bucladesine	2e-06	MCF7	0	0.16	0.367555
843		5279552	2.2e-05	MCF7	0	0.16	0.367555
849	DB00755	tretinoin	1e-06	MCF7	0	0.16	0.367555
862		5230742	1.7e-05	MCF7	0	0.08	0.367555
864	DB02424	geldanamycin	1e-06	MCF7	0	0.21	0.367555
865		quinostatin	1e-05	MCF7	0	0.2	0.367555
868		5182598	2.5e-05	MCF7	0	0.1	0.367555
869	DB08059	wortmannin	1e-06	MCF7	0	0.16	0.367555
881		docosahexaenoic acid ethyl ester	0.0001	MCF7	0	0.14	0.367555
893		pararosaniline	1e-05	MCF7	0	0.11	0.367555
896		5152487	1e-05	MCF7	0	0.08	0.367555
900		5186324	2e-06	MCF7	0	0.06	0.367555
901		5114445	1e-05	MCF7	0	0.11	0.367555
903		5151277	1.4e-05	MCF7	0	0.1	0.367555
904		5109870	2.5e-05	MCF7	0	0.14	0.367555
905	DB00257	clotrimazole	5e-05	MCF7	0	0.08	0.367555
906		calmidazolium	5e-06	MCF7	0	0.2	0.367555
908		5140203	1.5e-05	MCF7	0	0.15	0.367555
909		HC toxin	1e-07	MCF7	0	0.14	0.367555
911	DB08059	wortmannin	1e-08	MCF7	0	0.11	0.367555
913	DB02587	colforsin	5e-05	MCF7	0	0.17	0.367555
914		rottlerin	1e-05	MCF7	0	0.11	0.367555
915	DB00273	topiramate	3e-06	MCF7	0	0.23	0.367555
916	DB05134	tanespimycin	1e-06	MCF7	0	0.15	0.367555
919	DB00564	carbamazepine	1e-07	MCF7	0	0.18	0.367555
920	DB01262	decitabine	1e-07	MCF7	0	0.16	0.367555
922	DB00482	celecoxib	1e-05	MCF7	0	0.2	0.367555
941		rottlerin	1e-05	MCF7	0	0.18	0.367555
942	DB00457	prazosin	1e-05	MCF7	0	0.11	0.367555
948		Y-27632	3e-06	MCF7	0	0.14	0.367555
949		5255229	1.3e-05	MCF7	0	0.14	0.367555
950		5211181	1.2e-05	MCF7	0	0.09	0.367555
958	DB02709	resveratrol	1e-05	MCF7	0	0.14	0.367555
959	DB13242	bucladesine	2e-06	MCF7	0	0.03	0.367555
966	DB00755	tretinoin	1e-06	MCF7	0	0.09	0.367555
970		5230742	1.7e-05	MCF7	0	0.18	0.367555
972	DB02424	geldanamycin	1e-06	MCF7	0	0.1	0.367555
976		5182598	2.5e-05	MCF7	0	0.08	0.367555
977	DB08059	wortmannin	1e-06	MCF7	0	0.14	0.367555
978	DB06816	pyrvinium	1.25e-06	MCF7	0	0.12	0.367555
979		ionomycin	2e-06	MCF7	0	0.14	0.367555
981		trichostatin A	1e-06	MCF7	0	0.1	0.367555
982		depudecin	1e-06	MCF7	0	0.13	0.367555
983	DB00502	haloperidol	1e-05	MCF7	0	0.2	0.367555
985	DB00947	fulvestrant	1e-06	MCF7	0	0.17	0.367555
988	DB00783	estradiol	1e-07	MCF7	0	0.13	0.367555
989	DB00313	valproic acid	0.001	MCF7	0	0.14	0.367555
990		alpha-estradiol	1e-08	MCF7	0	0.15	0.367555
991	DB00755	tretinoin	1e-06	MCF7	0	0.12	0.367555
992		trichostatin A	1e-07	MCF7	0	0.2	0.367555
994	DB00313	valproic acid	0.0002	MCF7	0	0.11	0.367555
995	DB00433	prochlorperazine	1e-05	MCF7	0	0.09	0.367555
996	DB02656	LY-294002	1e-07	MCF7	0	0.13	0.367555
997	DB00477	chlorpromazine	1e-06	MCF7	0	0.1	0.367555
999		monorden	1e-07	MCF7	0	0.13	0.367555
1001	DB00877	sirolimus	1e-07	MCF7	0	0.06	0.367555
1003	DB00179	nordihydroguaiaretic acid	1e-06	MCF7	0	0.06	0.367555
1004	DB00831	trifluoperazine	1e-05	MCF7	0	0.2	0.367555
1005	DB05134	tanespimycin	1e-06	MCF7	0	0.15	0.367555
1006	DB05134	tanespimycin	1e-06	MCF7	0	0.13	0.367555
1007	DB02656	LY-294002	1e-05	MCF7	0	0.08	0.367555
1009	DB00363	clozapine	1e-05	MCF7	0	0.18	0.367555
1013	DB00412	rosiglitazone	1e-05	MCF7	0	0.04	0.367555
1015	DB01645	genistein	1e-05	MCF7	0	0.13	0.367555
1016	DB02656	LY-294002	1e-05	MCF7	0	0.18	0.367555
1017	DB00623	fluphenazine	1e-05	MCF7	0	0.16	0.367555
1019	DB02656	LY-294002	1e-05	MCF7	0	0.17	0.367555
1020	DB00313	valproic acid	0.0005	MCF7	0	0.17	0.367555
1021	DB00783	estradiol	1e-08	MCF7	0	0.17	0.367555
1022	DB00877	sirolimus	1e-07	MCF7	0	0.09	0.367555
1023	DB08059	wortmannin	1e-08	MCF7	0	0.1	0.367555
1024	DB00502	haloperidol	1e-05	MCF7	0	0.18	0.367555
1041	DB00502	haloperidol	1e-05	MCF7	0	0.02	0.367555
1042	DB00945	acetylsalicylic acid	0.0001	MCF7	0	0.08	0.367555
1045	DB00877	sirolimus	1e-07	MCF7	0	0.02	0.367555
1047	DB00313	valproic acid	0.001	MCF7	0	0.03	0.367555
1048		alpha-estradiol	1e-08	MCF7	0	0.06	0.367555
1049	DB00755	tretinoin	1e-06	MCF7	0	0.02	0.367555
1050		trichostatin A	1e-07	MCF7	0	0.08	0.367555
1054	DB02656	LY-294002	1e-07	MCF7	0	0.03	0.367555
1055	DB00477	chlorpromazine	1e-06	MCF7	0	0.07	0.367555
1059	DB00877	sirolimus	1e-07	MCF7	0	0.01	0.367555
1060	DB00313	valproic acid	5e-05	MCF7	0	0.09	0.367555
1061	DB00179	nordihydroguaiaretic acid	1e-06	MCF7	0	0.09	0.367555
1065	DB02656	LY-294002	1e-05	MCF7	0	0.1	0.367555
1071	DB00412	rosiglitazone	1e-05	MCF7	0	0.1	0.367555
1073	DB01645	genistein	1e-05	MCF7	0	0.09	0.367555
1074	DB02656	LY-294002	1e-05	MCF7	0	0.16	0.367555
1077	DB02656	LY-294002	1e-05	MCF7	0	0.11	0.367555
1078	DB00313	valproic acid	0.0005	MCF7	0	0.16	0.367555
1079	DB00783	estradiol	1e-08	MCF7	0	0.05	0.367555
1080	DB00877	sirolimus	1e-07	MCF7	0	0.1	0.367555
1081	DB08059	wortmannin	1e-08	MCF7	0	0.11	0.367555
1082	DB00502	haloperidol	1e-05	MCF7	0	0.09	0.367555
1103	DB13318	demecolcine	1.17e-05	MCF7	0	0.04	0.367555
1105	DB11430	monensin	1.09e-05	MCF7	0	0.04	0.367555
1108		12,13-EODE	2e-07	MCF7	0	0.05	0.367555
1113	DB00254	doxycycline	1.44e-05	MCF7	0	0.04	0.367555
1114		tyrphostin AG-825	2.52e-05	MCF7	0	0.05	0.367555
1115		phenanthridinone	5.12e-05	MCF7	0	0.07	0.367555
1121		DL-PPMP	2e-06	MCF7	0	0.07	0.367555
1122		cytochalasin B	2.08e-05	MCF7	0	0.04	0.367555
1132		BW-B70C	3.16e-05	MCF7	0	0.11	0.367555
1135	DB01017	minocycline	1.05e-05	MCF7	0	0.09	0.367555
1138	DB00692	phentolamine	1.15e-05	MCF7	0	0.09	0.367555
1141		tyrphostin AG-1478	3.16e-05	MCF7	0	0.13	0.367555
1144	DB00502	haloperidol	1e-05	HL60	0	0.1	0.367555
1145	DB00945	acetylsalicylic acid	0.0001	HL60	0	0.13	0.367555
1146	DB00947	fulvestrant	1e-06	HL60	0	0.13	0.367555
1147	DB05134	tanespimycin	1e-06	HL60	0	0.1	0.367555
1148	DB00877	sirolimus	1e-07	HL60	0	0.11	0.367555
1149	DB00783	estradiol	1e-07	HL60	0	0.14	0.367555
1150	DB00313	valproic acid	0.001	HL60	0	0.13	0.367555
1151		alpha-estradiol	1e-08	HL60	0	0.13	0.367555
1152	DB00755	tretinoin	1e-06	HL60	0	0.13	0.367555
1153		trichostatin A	1e-07	HL60	0	0.09	0.367555
1155	DB00313	valproic acid	0.0002	HL60	0	0.18	0.367555
1156	DB00433	prochlorperazine	1e-05	HL60	0	0.09	0.367555
1157	DB02656	LY-294002	1e-07	HL60	0	0.08	0.367555
1158	DB00477	chlorpromazine	1e-06	HL60	0	0.12	0.367555
1160		monorden	1e-07	HL60	0	0.21	0.367555
1161	DB02546	vorinostat	1e-05	HL60	0	0.14	0.367555
1162	DB00877	sirolimus	1e-07	HL60	0	0.1	0.367555
1163	DB00313	valproic acid	5e-05	HL60	0	0.08	0.367555
1164	DB00179	nordihydroguaiaretic acid	1e-06	HL60	0	0.13	0.367555
1165	DB00831	trifluoperazine	1e-05	HL60	0	0.1	0.367555
1167	DB05134	tanespimycin	1e-06	HL60	0	0.16	0.367555
1168	DB02656	LY-294002	1e-05	HL60	0	0.14	0.367555
1169	DB02424	geldanamycin	1e-06	HL60	0	0.14	0.367555
1170	DB00363	clozapine	1e-05	HL60	0	0.17	0.367555
1171	DB00679	thioridazine	1e-05	HL60	0	0.17	0.367555
1173	DB00197	troglitazone	1e-05	HL60	0	0.15	0.367555
[truncated: 4,838 more rows]

## Sheet: hSFGDAAnet_GSE147528
Instance ID in the Cmap database	DrugBank ID	Drug Name	Drug Dose in Cmap database	Cell lines in Cmap database	Eneichment Score (ES)	P-value	adjusted p-value (FDR)
[truncated: 6,100 more rows]

[truncated: 1 more sheets: hDAAnet_GSE138852]
